# Supplementary material for: Evidence for evolutionary divergence of activity-dependent gene expression in developing neurons
Source: eLife journal article supplement (doi:10.7554/elife.20337), 2016-10-01
Supplement: supp [file elife-20337-supp-v1.zip]

**Figure 3-figure supplement 1.**

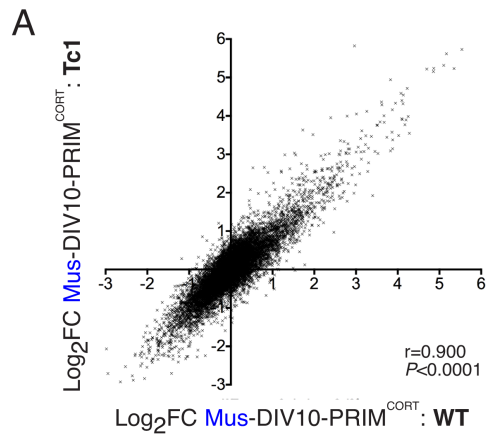

**Figure 3-figure supplement 1. A)** Correlation of KCl/FPL-induced fold-change in the same 11,302 mouse genes analysed in Figs 1 and 2, in DIV10 Mus-ESC<sup>CORT</sup>-neurons from wild-type vs. Tc1 primary cortical neurons, showing the expected high correlation.
