# Supplementary material for: Evidence for evolutionary divergence of activity-dependent gene expression in developing neurons
Source: eLife journal article supplement (doi:10.7554/elife.20337), 2016-10-01
Supplement: supp [file elife-20337-supp-v1.zip]

Archive with 14 entries (14 files):
- elife_poa_e20337_Figure_3_source_data_1.xlsx
- elife_poa_e20337_Figure_1_source_data_4.xlsx
- elife_poa_e20337_Figure_1_source_data_3.xlsx
- elife_poa_e20337_Figure_1_figure_supplement_1.pdf
- elife_poa_e20337_Figure_3_source_data_2.xlsx
- elife_poa_e20337_Figure_2_source_data_1.xlsx
- elife_poa_e20337_Figure_3_figure_supplement_1.pdf
- elife_poa_e20337_Figure_1_source_data_5.xlsx
- elife_poa_e20337_Figure_2_figure_supplement_1.pdf
- elife_poa_e20337_Figure_2_source_data_2.xlsx
- elife_poa_e20337_Figure_1_source_data_2.xlsx
- elife_poa_e20337_Figure_2_source_data_3.xlsx
- elife_poa_e20337_Figure_3_source_data_3.xlsx
- elife_poa_e20337_Figure_1_source_data_1.xlsx
