# Supplementary material for: Evidence for evolutionary divergence of activity-dependent gene expression in developing neurons
Source: eLife journal article supplement (doi:10.7554/elife.20337), 2016-10-01
Supplement: supp [file elife-20337-supp-v1.zip › elife_poa_e20337_Figure_1_figure_supplement_1.pdf]

**Figure 1-figure supplement 1.**

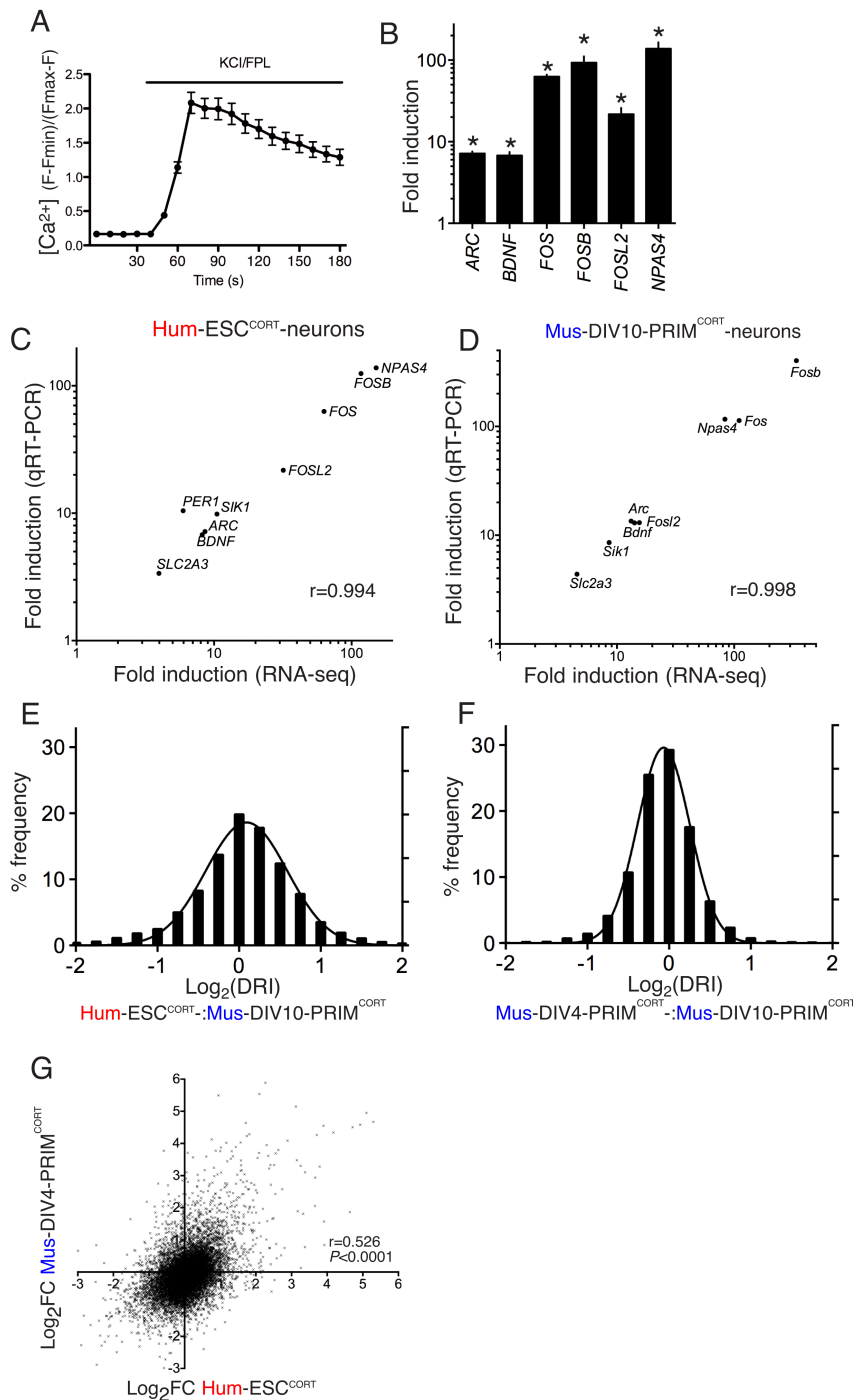

**Figure 1-figure supplement 1.** **A)** Example fluo-3  $Ca^{2+}$  imaging trace of KCL/FPL-treated Hum-ESC<sup>CORT</sup>-neurons. **B)** qPCR analysis of the fold induction of the indicated genes in Hum-ESC<sup>CORT</sup>-neurons after 4h of KCl/FPL treatment. \* $P=0.0001$ ,  $0.0013$ ,  $6E-05$ ,  $0.0005$ ,  $0.0086$ ,  $0.0010$ , 2-tailed  $t$ -test ( $n=3$ ). **C,D)** A comparison of the magnitude of gene induction of a selection of human (C) and mouse (D) genes, as assayed by RNA-seq and by qRT-PCR. In both cases identical sets of 3 independent replicates were assayed and the mean calculated. **E)** For the 11,302 orthologous pairs, the "differential regulation index" (DRI) was calculated, defined as the fold-change (Hum-ESC<sup>CORT</sup>-neurons) divided by the fold-change (DIV10 Mus-PRIM<sup>CORT</sup>-neurons). The distribution of the  $\log_2$  of the DRIs is shown. **F)** As for (E) except the DRI was calculated for DIV4 vs. DIV10 Mus-PRIM<sup>CORT</sup>-neurons. **G)** Correlation of KCl/FPL-induced fold-change in 11,302 ortholog pairs in DIV4 Mus-PRIM<sup>CORT</sup>-neurons vs. Hum-ESC<sup>CORT</sup>-neurons.
