# Supplementary material for: Evidence for evolutionary divergence of activity-dependent gene expression in developing neurons
Source: eLife journal article supplement (doi:10.7554/elife.20337), 2016-10-01
Supplement: supp [file elife-20337-supp-v1.zip › elife_poa_e20337_Figure_1_source_data_2.xlsx]

## Sheet: Fig. S1a
Time	Mean [CA2+]: ((F-Fmin)/(Fmax-F))	SD	n
10	0.335533	0.0341193	45
20	0.33988	0.0349971	45
30	0.339108	0.0349278	45
40	0.335831	0.0348999	45
50	0.333674	0.0333766	45
60	0.333652	0.0331067	45
70	0.330127	0.032054	45
80	1.58495	0.0856076	45
90	2.99721	0.185135	45
100	2.9491	0.173908	45
110	2.83049	0.152779	45
120	2.50542	0.12217	45
130	2.38182	0.114186	45
140	2.17579	0.103696	45
150	2.12942	0.0982404	45
160	2.03911	0.0944579	45
170	1.96846	0.090775	45
180	1.90294	0.0883642	45
190	1.8791	0.08729	45
200	1.85697	0.0875167	45
210	1.74869	0.083609	45
