# Supplementary material for: Evidence for evolutionary divergence of activity-dependent gene expression in developing neurons
Source: eLife journal article supplement (doi:10.7554/elife.20337), 2016-10-01
Supplement: supp [file elife-20337-supp-v1.zip › elife_poa_e20337_Figure_1_source_data_3.xlsx]

## Sheet: FigS1b
arc	ctr	4hr		mean fold change	ctr	4 hr
1	1	7.91722		FOSL2	1	29.8148
2	1	6.45246			1	20.1471
3	1	7.17082			1	15.1589
mean	1	7.18017	0.422865	mean	1	21.7069	4.30207
mean fold change	ctr	4 hr		mean fold change	ctr	4 hr
BDNF	1	5.32708		NPAS4	1	174.168
	1	7.46448			1	119.887
	1	7.53155			1	174.398
mean	1	6.77437	0.723901	mean	1	156.151	18.1321
mean fold change	ctr	4 hr		mean fold change	ctr	4 hr
FOS	1	57.3043		FOS	1	189.489
	1	69.3135			1	83.6669
	1	61.9299			1	60.139
mean	1	62.8492	3.49709		1	85.953
					1	132.885
					1	40.1657
					1	60.0294
				mean		93.1898	19.5155
