# Supplementary material for: Evidence for evolutionary divergence of activity-dependent gene expression in developing neurons
Source: eLife journal article supplement (doi:10.7554/elife.20337), 2016-10-01
Supplement: supp [file elife-20337-supp-v1.zip › elife_poa_e20337_Figure_1_source_data_4.xlsx]

## Sheet: Fig. S1c,d
		Mouse-RNAseq	Mouse-qPCR				Human-RNAseq	Human-qPCR
	Fosb	339.741	402.881	n=3		NPAS4	150.737	138.336	n=3
	Npas4	83.4302	116.659	n=3		FOSB	117.058	124.702	n=3
	Fos	110.461	113.318	n=3		FOS	63.005	62.8492	n=3
	Fosl2	13.2117	13.4837	n=3		FOSL2	31.8659	21.7069	n=3
	Arc	15.5508	13.0345	n=3		PER1	5.95708	10.4529	n=3
	Bdnf	14.1167	12.9952	n=3		SIK1	10.4925	9.85468	n=3
	Sik1	8.57453	8.55475	n=3		ARC	8.59012	7.18017	n=3
	Slc2a3	4.55847	4.38424	n=3		BDNF	8.19888	6.77437	n=3
						SLC2A3	3.97872	3.36781	n=3
