# Supplementary material for: Evidence for evolutionary divergence of activity-dependent gene expression in developing neurons
Source: eLife journal article supplement (doi:10.7554/elife.20337), 2016-10-01
Supplement: supp [file elife-20337-supp-v1.zip › elife_poa_e20337_Figure_1_source_data_5.xlsx]

## Sheet: Fig. S1e,f
human_gene	human_gene_name	human_description	Fold Change (Hum-ESC-neurons)	Fold Change Mus DIV10 CORT neurons	LOG2(DRI)-Hum-ESC vs Mus DIV10 CORT	.	Fold Change Mus DIV4 CORT neurons	Fold Change Mus DIV10 CORT neurons	LOG2(DRI)-Hum-ESC vs Mus DIV10 CORT
ENSG00000111262	KCNA1	potassium channel, voltage gated shaker related subfamily A, member 1 [Source:HGNC Symbol;Acc:HGNC:6218]	12.6156	1.08472	3.53982		4.15182	1.08472	1.93642
ENSG00000186594	MIR22HG	MIR22 host gene [Source:HGNC Symbol;Acc:HGNC:28219]	10.0308	1.00211	3.32332		3.51588	1.00211	1.81084
ENSG00000171246	NPTX1	neuronal pentraxin I [Source:HGNC Symbol;Acc:HGNC:7952]	15.013	1.59155	3.23771		2.97159	1.59155	0.900801
ENSG00000197921	HES5	hes family bHLH transcription factor 5 [Source:HGNC Symbol;Acc:HGNC:19764]	0.981226	0.111875	3.1327		0.821107	0.111875	2.87568
ENSG00000187626	ZKSCAN4	zinc finger with KRAB and SCAN domains 4 [Source:HGNC Symbol;Acc:HGNC:13854]	0.669287	0.0777075	3.1065		0.126339	0.0777075	0.701174
ENSG00000160179	ABCG1	ATP-binding cassette, sub-family G (WHITE), member 1 [Source:HGNC Symbol;Acc:HGNC:73]	3.28377	0.39969	3.0384		0.679571	0.39969	0.765742
ENSG00000278129	ZNF8	zinc finger protein 8 [Source:HGNC Symbol;Acc:HGNC:13154]	1.05488	0.131004	3.00939		0.261084	0.131004	0.9949
ENSG00000179388	EGR3	early growth response 3 [Source:HGNC Symbol;Acc:HGNC:3240]	26.2577	3.80006	2.78865		22.6978	3.80006	2.57846
ENSG00000144647	POMGNT2	protein O-linked mannose N-acetylglucosaminyltransferase 2 (beta 1,4-) [Source:HGNC Symbol;Acc:HGNC:25902]	1.39975	0.217673	2.68494		0.332976	0.217673	0.613254
ENSG00000207870	MIR221	microRNA 221 [Source:HGNC Symbol;Acc:HGNC:31601]	15.1639	2.40108	2.65888		1.78913	2.40108	-0.424427
ENSG00000135750	KCNK1	potassium channel, two pore domain subfamily K, member 1 [Source:HGNC Symbol;Acc:HGNC:6272]	5.74274	0.930657	2.62542		0.84115	0.930657	-0.145887
ENSG00000119737	GPR75	G protein-coupled receptor 75 [Source:HGNC Symbol;Acc:HGNC:4526]	3.50633	0.575449	2.6072		0.706937	0.575449	0.296895
ENSG00000198435	NRARP	NOTCH-regulated ankyrin repeat protein [Source:HGNC Symbol;Acc:HGNC:33843]	1.89951	0.321371	2.56332		0.922591	0.321371	1.52145
ENSG00000164086	DUSP7	dual specificity phosphatase 7 [Source:HGNC Symbol;Acc:HGNC:3073]	1.53386	0.263791	2.5397		0.549247	0.263791	1.05806
ENSG00000128285	MCHR1	melanin-concentrating hormone receptor 1 [Source:HGNC Symbol;Acc:HGNC:4479]	5.9918	1.0333	2.53573		1.34547	1.0333	0.380844
ENSG00000130164	LDLR	low density lipoprotein receptor [Source:HGNC Symbol;Acc:HGNC:6547]	4.43166	0.777664	2.51063		1.13906	0.777664	0.550628
ENSG00000167550	RHEBL1	Ras homolog enriched in brain like 1 [Source:HGNC Symbol;Acc:HGNC:21166]	3.21047	0.572703	2.48693		0.787038	0.572703	0.458647
ENSG00000158792	SPATA2L	spermatogenesis associated 2-like [Source:HGNC Symbol;Acc:HGNC:28393]	4.39331	0.789525	2.47625		0.983157	0.789525	0.316436
ENSG00000099625	CBARP	calcium channel, voltage-dependent, beta subunit associated regulatory protein [Source:HGNC Symbol;Acc:HGNC:28617]	5.34159	0.969747	2.46159		1.18101	0.969747	0.284345
ENSG00000185924	RTN4RL1	reticulon 4 receptor-like 1 [Source:HGNC Symbol;Acc:HGNC:21329]	2.53812	0.466999	2.44227		0.584303	0.466999	0.323298
ENSG00000281398	SNHG4	small nucleolar RNA host gene 4 [Source:HGNC Symbol;Acc:HGNC:32964]	3.38588	0.626945	2.43312		0.814022	0.626945	0.37673
ENSG00000273274	ZBTB8B	zinc finger and BTB domain containing 8B [Source:HGNC Symbol;Acc:HGNC:37057]	0.615236	0.115898	2.40828		0.161096	0.115898	0.475068
ENSG00000100219	XBP1	X-box binding protein 1 [Source:HGNC Symbol;Acc:HGNC:12801]	3.46146	0.654314	2.40332		1.00335	0.654314	0.616766
ENSG00000122254	HS3ST2	heparan sulfate (glucosamine) 3-O-sulfotransferase 2 [Source:HGNC Symbol;Acc:HGNC:5195]	6.52271	1.24247	2.39226		1.43452	1.24247	0.207361
ENSG00000276600	RAB7B	RAB7B, member RAS oncogene family [Source:HGNC Symbol;Acc:HGNC:30513]	3.78533	0.732494	2.36953		0.690923	0.732494	-0.0842927
ENSG00000142544	CTU1	cytosolic thiouridylase subunit 1 [Source:HGNC Symbol;Acc:HGNC:29590]	0.860693	0.167284	2.3632		0.361615	0.167284	1.11216
ENSG00000163961	RNF168	ring finger protein 168, E3 ubiquitin protein ligase [Source:HGNC Symbol;Acc:HGNC:26661]	2.03754	0.405341	2.32962		0.611979	0.405341	0.594345
ENSG00000170214	ADRA1B	adrenoceptor alpha 1B [Source:HGNC Symbol;Acc:HGNC:278]	4.28919	0.856586	2.32403		1.10151	0.856586	0.362815
ENSG00000145506	NKD2	naked cuticle homolog 2 (Drosophila) [Source:HGNC Symbol;Acc:HGNC:17046]	5.4227	1.10721	2.29208		0.656865	1.10721	-0.753262
ENSG00000173258	ZNF483	zinc finger protein 483 [Source:HGNC Symbol;Acc:HGNC:23384]	1.05258	0.215481	2.2883		0.261483	0.215481	0.279152
ENSG00000109089	CDR2L	cerebellar degeneration-related protein 2-like [Source:HGNC Symbol;Acc:HGNC:29999]	2.77861	0.577638	2.26613		0.5915	0.577638	0.034212
ENSG00000100285	NEFH	neurofilament, heavy polypeptide [Source:HGNC Symbol;Acc:HGNC:7737]	1.53418	0.330391	2.21522		0.31316	0.330391	-0.0772748
ENSG00000066735	KIF26A	kinesin family member 26A [Source:HGNC Symbol;Acc:HGNC:20226]	1.84386	0.39771	2.21294		0.491053	0.39771	0.304164
ENSG00000182318	ZSCAN22	zinc finger and SCAN domain containing 22 [Source:HGNC Symbol;Acc:HGNC:4929]	1.21854	0.265537	2.19817		0.499505	0.265537	0.911587
ENSG00000204060	FOXO6	forkhead box O6 [Source:HGNC Symbol;Acc:HGNC:24814]	2.66213	0.581152	2.19559		0.577712	0.581152	-0.00856535
ENSG00000198805	PNP	purine nucleoside phosphorylase [Source:HGNC Symbol;Acc:HGNC:7892]	2.39551	0.524145	2.1923		0.715266	0.524145	0.448514
ENSG00000143067	ZNF697	zinc finger protein 697 [Source:HGNC Symbol;Acc:HGNC:32034]	1.28391	0.281755	2.18803		0.285965	0.281755	0.0213964
ENSG00000197362	ZNF786	zinc finger protein 786 [Source:HGNC Symbol;Acc:HGNC:21806]	0.687899	0.151126	2.18645		0.15183	0.151126	0.00671393
ENSG00000171621	SPSB1	splA/ryanodine receptor domain and SOCS box containing 1 [Source:HGNC Symbol;Acc:HGNC:30628]	6.99343	1.55077	2.17302		1.6784	1.55077	0.11411
ENSG00000214309	MBLAC1	metallo-beta-lactamase domain containing 1 [Source:HGNC Symbol;Acc:HGNC:22180]	1.81024	0.406356	2.15536		0.29111	0.406356	-0.481176
ENSG00000171174	RBKS	ribokinase [Source:HGNC Symbol;Acc:HGNC:30325]	3.75953	0.84541	2.15283		1.75618	0.84541	1.05472
ENSG00000260001	TGFBR3L	transforming growth factor, beta receptor III-like [Source:HGNC Symbol;Acc:HGNC:44152]	0.888442	0.200092	2.15062		0.849112	0.200092	2.08529
ENSG00000136213	CHST12	carbohydrate (chondroitin 4) sulfotransferase 12 [Source:HGNC Symbol;Acc:HGNC:17423]	0.867833	0.196503	2.14287		0.280533	0.196503	0.513618
ENSG00000116903	EXOC8	exocyst complex component 8 [Source:HGNC Symbol;Acc:HGNC:24659]	1.08581	0.246656	2.1382		0.384242	0.246656	0.639513
ENSG00000151470	C4orf33	chromosome 4 open reading frame 33 [Source:HGNC Symbol;Acc:HGNC:27025]	4.17285	0.955861	2.12616		0.729967	0.955861	-0.38897
ENSG00000104856	RELB	v-rel avian reticuloendotheliosis viral oncogene homolog B [Source:HGNC Symbol;Acc:HGNC:9956]	9.02962	2.09415	2.1083		3.70376	2.09415	0.822627
ENSG00000183307	CECR6	cat eye syndrome chromosome region, candidate 6 [Source:HGNC Symbol;Acc:HGNC:1844]	0.994725	0.231397	2.10393		0.247421	0.231397	0.0965954
ENSG00000134480	CCNH	cyclin H [Source:HGNC Symbol;Acc:HGNC:1594]	3.67807	0.868252	2.08276		0.811821	0.868252	-0.0969516
ENSG00000166002	SMCO4	single-pass membrane protein with coiled-coil domains 4 [Source:HGNC Symbol;Acc:HGNC:24810]	2.08001	0.492261	2.0791		0.463864	0.492261	-0.0857211
ENSG00000183665	TRMT12	tRNA methyltransferase 12 homolog (S. cerevisiae) [Source:HGNC Symbol;Acc:HGNC:26091]	1.25085	0.296368	2.07745		0.401116	0.296368	0.436628
ENSG00000166886	NAB2	NGFI-A binding protein 2 (EGR1 binding protein 2) [Source:HGNC Symbol;Acc:HGNC:7627]	4.37924	1.04254	2.07057		1.02325	1.04254	-0.0269487
ENSG00000159167	STC1	stanniocalcin 1 [Source:HGNC Symbol;Acc:HGNC:11373]	3.96951	0.945768	2.0694		1.82397	0.945768	0.947526
ENSG00000144815	NXPE3	neurexophilin and PC-esterase domain family, member 3 [Source:HGNC Symbol;Acc:HGNC:28238]	1.25571	0.299321	2.06874		0.391449	0.299321	0.387132
ENSG00000170425	ADORA2B	adenosine A2b receptor [Source:HGNC Symbol;Acc:HGNC:264]	1.64671	0.393471	2.06526		0.888961	0.393471	1.17586
ENSG00000254470	AP5B1	adaptor-related protein complex 5, beta 1 subunit [Source:HGNC Symbol;Acc:HGNC:25104]	1.44605	0.348284	2.05378		0.455161	0.348284	0.386111
ENSG00000106346	USP42	ubiquitin specific peptidase 42 [Source:HGNC Symbol;Acc:HGNC:20068]	1.7098	0.413781	2.04689		0.654526	0.413781	0.661582
ENSG00000203952	CCDC160	coiled-coil domain containing 160 [Source:HGNC Symbol;Acc:HGNC:37286]	1.60687	0.390337	2.04146		0.596724	0.390337	0.612343
ENSG00000151151	IPMK	inositol polyphosphate multikinase [Source:HGNC Symbol;Acc:HGNC:20739]	2.05152	0.499655	2.03769		0.566389	0.499655	0.180863
ENSG00000171303	KCNK3	potassium channel, two pore domain subfamily K, member 3 [Source:HGNC Symbol;Acc:HGNC:6278]	2.0856	0.512549	2.0247		0.516524	0.512549	0.0111439
ENSG00000215012	C22orf29	chromosome 22 open reading frame 29 [Source:HGNC Symbol;Acc:HGNC:26112]	0.935403	0.229895	2.02461		0.338625	0.229895	0.55871
ENSG00000137962	ARHGAP29	Rho GTPase activating protein 29 [Source:HGNC Symbol;Acc:HGNC:30207]	3.3104	0.814318	2.02334		0.907937	0.814318	0.157
ENSG00000157613	CREB3L1	cAMP responsive element binding protein 3-like 1 [Source:HGNC Symbol;Acc:HGNC:18856]	3.36335	0.833354	2.0129		1.02322	0.833354	0.296111
ENSG00000060138	YBX3	Y box binding protein 3 [Source:HGNC Symbol;Acc:HGNC:2428]	2.81436	0.702423	2.00239		0.904149	0.702423	0.364221
ENSG00000254656	RTL1	retrotransposon-like 1 [Source:HGNC Symbol;Acc:HGNC:14665]	2.19907	0.553574	1.99005		1.63067	0.553574	1.55862
ENSG00000182362	YBEY	ybeY metallopeptidase (putative) [Source:HGNC Symbol;Acc:HGNC:1299]	0.902959	0.227427	1.98926		0.258826	0.227427	0.186579
ENSG00000146858	ZC3HAV1L	zinc finger CCCH-type, antiviral 1-like [Source:HGNC Symbol;Acc:HGNC:22423]	1.02834	0.261543	1.9752		0.413196	0.261543	0.659782
ENSG00000160062	ZBTB8A	zinc finger and BTB domain containing 8A [Source:HGNC Symbol;Acc:HGNC:24172]	0.759879	0.193495	1.97348		0.237904	0.193495	0.298084
ENSG00000151025	GPR158	G protein-coupled receptor 158 [Source:HGNC Symbol;Acc:HGNC:23689]	2.73381	0.703372	1.95855		0.917517	0.703372	0.383446
ENSG00000103642	LACTB	lactamase, beta [Source:HGNC Symbol;Acc:HGNC:16468]	1.37726	0.354841	1.95656		0.395759	0.354841	0.157452
ENSG00000250366	TUNAR	TCL1 upstream neural differentiation-associated RNA [Source:HGNC Symbol;Acc:HGNC:44088]	3.77257	0.980423	1.94407		0.764501	0.980423	-0.358886
ENSG00000172171	TEFM	transcription elongation factor, mitochondrial [Source:HGNC Symbol;Acc:HGNC:26223]	0.916021	0.238992	1.93842		0.214869	0.238992	-0.153503
ENSG00000116133	DHCR24	24-dehydrocholesterol reductase [Source:HGNC Symbol;Acc:HGNC:2859]	3.28923	0.85878	1.93739		0.74768	0.85878	-0.199868
ENSG00000158470	B4GALT5	UDP-Gal:betaGlcNAc beta 1,4- galactosyltransferase, polypeptide 5 [Source:HGNC Symbol;Acc:HGNC:928]	1.90833	0.501777	1.9272		0.453452	0.501777	-0.146095
ENSG00000207864	MIR27B	microRNA 27b [Source:HGNC Symbol;Acc:HGNC:31614]	1.6231	0.427238	1.92564		0.730192	0.427238	0.773235
ENSG00000040608	RTN4R	reticulon 4 receptor [Source:HGNC Symbol;Acc:HGNC:18601]	1.44754	0.383208	1.9174		0.189677	0.383208	-1.01458
ENSG00000169981	ZNF35	zinc finger protein 35 [Source:HGNC Symbol;Acc:HGNC:13099]	1.67083	0.44518	1.9081		0.486085	0.44518	0.126818
ENSG00000205903	ZNF316	zinc finger protein 316 [Source:HGNC Symbol;Acc:HGNC:13843]	1.51835	0.406147	1.90243		0.506297	0.406147	0.317981
ENSG00000117143	UAP1	UDP-N-acetylglucosamine pyrophosphorylase 1 [Source:HGNC Symbol;Acc:HGNC:12457]	3.63377	0.977211	1.89472		1.15286	0.977211	0.238474
ENSG00000177125	ZBTB34	zinc finger and BTB domain containing 34 [Source:HGNC Symbol;Acc:HGNC:31446]	1.53549	0.413072	1.89423		0.732056	0.413072	0.82556
ENSG00000162413	KLHL21	kelch-like family member 21 [Source:HGNC Symbol;Acc:HGNC:29041]	2.10709	0.569206	1.88823		1.05516	0.569206	0.890436
ENSG00000173805	HAP1	huntingtin-associated protein 1 [Source:HGNC Symbol;Acc:HGNC:4812]	3.57943	0.969892	1.88383		0.993368	0.969892	0.0345037
ENSG00000178163	ZNF518B	zinc finger protein 518B [Source:HGNC Symbol;Acc:HGNC:29365]	1.36747	0.373466	1.87246		0.441393	0.373466	0.24109
ENSG00000175087	PDIK1L	PDLIM1 interacting kinase 1 like [Source:HGNC Symbol;Acc:HGNC:18981]	0.806938	0.22067	1.87057		0.383503	0.22067	0.797347
ENSG00000143171	RXRG	retinoid X receptor, gamma [Source:HGNC Symbol;Acc:HGNC:10479]	1.09792	0.30062	1.86876		0.591842	0.30062	0.977269
ENSG00000249992	TMEM158	transmembrane protein 158 (gene/pseudogene) [Source:HGNC Symbol;Acc:HGNC:30293]	2.23077	0.612258	1.86533		1.09725	0.612258	0.841683
ENSG00000185338	SOCS1	suppressor of cytokine signaling 1 [Source:HGNC Symbol;Acc:HGNC:19383]	2.01621	0.553478	1.86505		0.827552	0.553478	0.580325
ENSG00000187867	PALM3	paralemmin 3 [Source:HGNC Symbol;Acc:HGNC:33274]	2.19549	0.602841	1.86469		0.339393	0.602841	-0.828822
ENSG00000164615	CAMLG	calcium modulating ligand [Source:HGNC Symbol;Acc:HGNC:1471]	1.48297	0.407971	1.86195		0.495761	0.407971	0.281179
ENSG00000157557	ETS2	v-ets avian erythroblastosis virus E26 oncogene homolog 2 [Source:HGNC Symbol;Acc:HGNC:3489]	3.806	1.05271	1.85417		1.05403	1.05271	0.00181526
ENSG00000124659	TBCC	tubulin folding cofactor C [Source:HGNC Symbol;Acc:HGNC:11580]	0.966851	0.268204	1.84997		0.484214	0.268204	0.852317
ENSG00000127993	RBM48	RNA binding motif protein 48 [Source:HGNC Symbol;Acc:HGNC:21785]	1.29287	0.359305	1.84729		0.578106	0.359305	0.686126
ENSG00000173875	ZNF791	zinc finger protein 791 [Source:HGNC Symbol;Acc:HGNC:26895]	1.29248	0.360066	1.8438		0.322989	0.360066	-0.156775
ENSG00000172893	DHCR7	7-dehydrocholesterol reductase [Source:HGNC Symbol;Acc:HGNC:2860]	2.41579	0.674831	1.8399		0.619722	0.674831	-0.122904
ENSG00000135953	MFSD9	major facilitator superfamily domain containing 9 [Source:HGNC Symbol;Acc:HGNC:28158]	1.25383	0.350717	1.83797		0.357984	0.350717	0.0295872
ENSG00000109084	TMEM97	transmembrane protein 97 [Source:HGNC Symbol;Acc:HGNC:28106]	3.26619	0.914466	1.83661		1.022	0.914466	0.160397
ENSG00000178074	C2orf69	chromosome 2 open reading frame 69 [Source:HGNC Symbol;Acc:HGNC:26799]	2.2922	0.647354	1.82411		0.67302	0.647354	0.0560947
ENSG00000119326	CTNNAL1	catenin (cadherin-associated protein), alpha-like 1 [Source:HGNC Symbol;Acc:HGNC:2512]	4.59152	1.29809	1.82258		1.0315	1.29809	-0.331651
ENSG00000211568	MIR670	microRNA 670 [Source:HGNC Symbol;Acc:HGNC:37304]	39.2989	11.1327	1.81968		25.4683	11.1327	1.1939
ENSG00000121578	B4GALT4	UDP-Gal:betaGlcNAc beta 1,4- galactosyltransferase, polypeptide 4 [Source:HGNC Symbol;Acc:HGNC:927]	1.25983	0.362588	1.79682		0.523143	0.362588	0.528872
ENSG00000164631	ZNF12	zinc finger protein 12 [Source:HGNC Symbol;Acc:HGNC:12902]	1.26006	0.363739	1.79251		0.649777	0.363739	0.83704
ENSG00000054967	RELT	RELT tumor necrosis factor receptor [Source:HGNC Symbol;Acc:HGNC:13764]	5.93585	1.72135	1.78591		1.82899	1.72135	0.0875037
ENSG00000171612	SLC25A33	solute carrier family 25 (pyrimidine nucleotide carrier), member 33 [Source:HGNC Symbol;Acc:HGNC:29681]	2.50553	0.730482	1.77819		0.743854	0.730482	0.0261707
ENSG00000141378	PTRH2	peptidyl-tRNA hydrolase 2 [Source:HGNC Symbol;Acc:HGNC:24265]	1.55248	0.452874	1.77739		0.486256	0.452874	0.102608
ENSG00000166173	LARP6	La ribonucleoprotein domain family, member 6 [Source:HGNC Symbol;Acc:HGNC:24012]	1.62949	0.477032	1.77226		0.468754	0.477032	-0.0252532
ENSG00000127418	FGFRL1	fibroblast growth factor receptor-like 1 [Source:HGNC Symbol;Acc:HGNC:3693]	1.40919	0.413449	1.76909		0.927237	0.413449	1.16523
ENSG00000005513	SOX8	SRY (sex determining region Y)-box 8 [Source:HGNC Symbol;Acc:HGNC:11203]	1.20738	0.354403	1.76841		0.922946	0.354403	1.38085
ENSG00000141750	STAC2	SH3 and cysteine rich domain 2 [Source:HGNC Symbol;Acc:HGNC:23990]	3.84141	1.13052	1.76466		0.936916	1.13052	-0.27099
ENSG00000186480	INSIG1	insulin induced gene 1 [Source:HGNC Symbol;Acc:HGNC:6083]	5.62932	1.65729	1.76413		3.19232	1.65729	0.94578
ENSG00000170485	NPAS2	neuronal PAS domain protein 2 [Source:HGNC Symbol;Acc:HGNC:7895]	2.14178	0.63075	1.76367		1.33169	0.63075	1.07812
ENSG00000105849	TWISTNB	TWIST neighbor [Source:HGNC Symbol;Acc:HGNC:18027]	1.84734	0.544258	1.76309		0.846761	0.544258	0.637663
ENSG00000180530	NRIP1	nuclear receptor interacting protein 1 [Source:HGNC Symbol;Acc:HGNC:8001]	1.73267	0.514402	1.75203		0.440612	0.514402	-0.223386
ENSG00000155090	KLF10	Kruppel-like factor 10 [Source:HGNC Symbol;Acc:HGNC:11810]	3.10931	0.923704	1.75109		1.33312	0.923704	0.529303
ENSG00000152193	RNF219	ring finger protein 219 [Source:HGNC Symbol;Acc:HGNC:20308]	0.94021	0.280385	1.74557		0.479754	0.280385	0.774884
ENSG00000100294	MCAT	malonyl CoA:ACP acyltransferase (mitochondrial) [Source:HGNC Symbol;Acc:HGNC:29622]	1.14294	0.342104	1.74024		0.236129	0.342104	-0.534859
ENSG00000072310	SREBF1	sterol regulatory element binding transcription factor 1 [Source:HGNC Symbol;Acc:HGNC:11289]	1.04898	0.316647	1.72804		0.473897	0.316647	0.581698
ENSG00000112242	E2F3	E2F transcription factor 3 [Source:HGNC Symbol;Acc:HGNC:3115]	1.73972	0.526488	1.72439		0.767027	0.526488	0.542878
ENSG00000174405	LIG4	ligase IV, DNA, ATP-dependent [Source:HGNC Symbol;Acc:HGNC:6601]	1.37929	0.420718	1.71301		0.395731	0.420718	-0.088331
ENSG00000179455	MKRN3	makorin ring finger protein 3 [Source:HGNC Symbol;Acc:HGNC:7114]	1.06538	0.32636	1.70683		0.873286	0.32636	1.41999
ENSG00000134058	CDK7	cyclin-dependent kinase 7 [Source:HGNC Symbol;Acc:HGNC:1778]	1.20487	0.36959	1.70487		0.537021	0.36959	0.539051
ENSG00000110104	CCDC86	coiled-coil domain containing 86 [Source:HGNC Symbol;Acc:HGNC:28359]	1.77677	0.54627	1.70157		0.692336	0.54627	0.341857
ENSG00000058600	POLR3E	polymerase (RNA) III (DNA directed) polypeptide E (80kD) [Source:HGNC Symbol;Acc:HGNC:30347]	1.40694	0.433457	1.6986		0.574459	0.433457	0.406314
ENSG00000132436	FIGNL1	fidgetin-like 1 [Source:HGNC Symbol;Acc:HGNC:13286]	1.55205	0.480071	1.69285		0.37037	0.480071	-0.37428
ENSG00000210112	MT-TM	mitochondrially encoded tRNA methionine [Source:HGNC Symbol;Acc:HGNC:7492]	2.51733	0.779287	1.69167		0.71581	0.779287	-0.122579
ENSG00000177051	FBXO46	F-box protein 46 [Source:HGNC Symbol;Acc:HGNC:25069]	1.0009	0.310651	1.68793		0.521943	0.310651	0.748599
ENSG00000188486	H2AFX	H2A histone family, member X [Source:HGNC Symbol;Acc:HGNC:4739]	1.41467	0.44412	1.67144		0.586406	0.44412	0.40095
ENSG00000110880	CORO1C	coronin, actin binding protein, 1C [Source:HGNC Symbol;Acc:HGNC:2254]	2.25755	0.710838	1.66716		0.692465	0.710838	-0.03778
ENSG00000182963	GJC1	gap junction protein, gamma 1, 45kDa [Source:HGNC Symbol;Acc:HGNC:4280]	2.48342	0.783535	1.66426		0.731558	0.783535	-0.0990253
ENSG00000100003	SEC14L2	SEC14-like lipid binding 2 [Source:HGNC Symbol;Acc:HGNC:10699]	2.09561	0.661232	1.66414		0.692201	0.661232	0.0660342
ENSG00000071205	ARHGAP10	Rho GTPase activating protein 10 [Source:HGNC Symbol;Acc:HGNC:26099]	3.6149	1.14067	1.66408		0.963595	1.14067	-0.243377
ENSG00000196150	ZNF250	zinc finger protein 250 [Source:HGNC Symbol;Acc:HGNC:13044]	0.830015	0.262575	1.66041		0.272294	0.262575	0.0524317
ENSG00000078237	TIGAR	TP53 induced glycolysis regulatory phosphatase [Source:HGNC Symbol;Acc:HGNC:1185]	1.19021	0.376618	1.66004		0.418243	0.376618	0.151239
ENSG00000207563	MIR23B	microRNA 23b [Source:HGNC Symbol;Acc:HGNC:31606]	1.3151	0.416603	1.65842		0.44635	0.416603	0.0995006
ENSG00000240849	TMEM189	transmembrane protein 189 [Source:HGNC Symbol;Acc:HGNC:16735]	2.71944	0.863703	1.6547		0.878303	0.863703	0.0241834
ENSG00000153006	SREK1IP1	SREK1-interacting protein 1 [Source:HGNC Symbol;Acc:HGNC:26716]	1.51975	0.48329	1.65288		0.557292	0.48329	0.205546
ENSG00000146587	RBAK	RB-associated KRAB zinc finger [Source:HGNC Symbol;Acc:HGNC:17680]	0.900258	0.288109	1.64372		0.696453	0.288109	1.27341
ENSG00000143153	ATP1B1	ATPase, Na+/K+ transporting, beta 1 polypeptide [Source:HGNC Symbol;Acc:HGNC:804]	3.62789	1.16758	1.63561		1.64303	1.16758	0.492842
ENSG00000160999	SH2B2	SH2B adaptor protein 2 [Source:HGNC Symbol;Acc:HGNC:17381]	2.10722	0.678364	1.63521		0.714159	0.678364	0.0741854
ENSG00000134594	RAB33A	RAB33A, member RAS oncogene family [Source:HGNC Symbol;Acc:HGNC:9773]	2.4008	0.774501	1.63217		0.440241	0.774501	-0.814973
ENSG00000215193	PEX26	peroxisomal biogenesis factor 26 [Source:HGNC Symbol;Acc:HGNC:22965]	1.01818	0.328958	1.63002		0.391288	0.328958	0.250326
ENSG00000243335	KCTD7	potassium channel tetramerization domain containing 7 [Source:HGNC Symbol;Acc:HGNC:21957]	1.74411	0.564317	1.62791		0.485523	0.564317	-0.216966
ENSG00000125657	TNFSF9	tumor necrosis factor (ligand) superfamily, member 9 [Source:HGNC Symbol;Acc:HGNC:11939]	2.42724	0.786935	1.625		0.578095	0.786935	-0.444937
ENSG00000109762	SNX25	sorting nexin 25 [Source:HGNC Symbol;Acc:HGNC:21883]	2.69808	0.876237	1.62254		0.856565	0.876237	-0.0327584
ENSG00000184916	JAG2	jagged 2 [Source:HGNC Symbol;Acc:HGNC:6189]	1.56933	0.510014	1.62154		0.468248	0.510014	-0.123263
ENSG00000147383	NSDHL	NAD(P) dependent steroid dehydrogenase-like [Source:HGNC Symbol;Acc:HGNC:13398]	2.42469	0.788199	1.62117		0.797956	0.788199	0.0177483
ENSG00000139438	FAM222A	family with sequence similarity 222, member A [Source:HGNC Symbol;Acc:HGNC:25915]	3.10489	1.01099	1.61877		1.46374	1.01099	0.53389
ENSG00000156471	PTDSS1	phosphatidylserine synthase 1 [Source:HGNC Symbol;Acc:HGNC:9587]	3.04611	0.992985	1.61713		0.982303	0.992985	-0.0156034
ENSG00000160161	CILP2	cartilage intermediate layer protein 2 [Source:HGNC Symbol;Acc:HGNC:24213]	1.09633	0.35903	1.6105		0.362015	0.35903	0.0119431
ENSG00000166292	TMEM100	transmembrane protein 100 [Source:HGNC Symbol;Acc:HGNC:25607]	4.50051	1.47721	1.60722		0.894547	1.47721	-0.723643
ENSG00000100564	PIGH	phosphatidylinositol glycan anchor biosynthesis, class H [Source:HGNC Symbol;Acc:HGNC:8964]	1.55746	0.51239	1.60389		0.50267	0.51239	-0.0276306
ENSG00000106086	PLEKHA8	pleckstrin homology domain containing, family A (phosphoinositide binding specific) member 8 [Source:HGNC Symbol;Acc:HGNC:30037]	1.5629	0.515651	1.59976		0.517756	0.515651	0.00587601
ENSG00000204950	LRRC10B	leucine rich repeat containing 10B [Source:HGNC Symbol;Acc:HGNC:37215]	1.3859	0.45726	1.59974		0.617866	0.45726	0.43428
ENSG00000119760	SUPT7L	suppressor of Ty 7 (S. cerevisiae)-like [Source:HGNC Symbol;Acc:HGNC:30632]	1.12643	0.37183	1.59905		0.366456	0.37183	-0.0210027
ENSG00000130734	ATG4D	autophagy related 4D, cysteine peptidase [Source:HGNC Symbol;Acc:HGNC:20789]	1.52846	0.504582	1.59892		0.641865	0.504582	0.347182
ENSG00000244405	ETV5	ets variant 5 [Source:HGNC Symbol;Acc:HGNC:3494]	2.89319	0.956669	1.59657		1.38796	0.956669	0.536872
ENSG00000139354	GAS2L3	growth arrest-specific 2 like 3 [Source:HGNC Symbol;Acc:HGNC:27475]	2.74468	0.910392	1.59208		1.63106	0.910392	0.841249
ENSG00000172336	POP7	POP7 homolog, ribonuclease P/MRP subunit [Source:HGNC Symbol;Acc:HGNC:19949]	1.44959	0.481414	1.59029		0.442825	0.481414	-0.120544
ENSG00000085644	ZNF213	zinc finger protein 213 [Source:HGNC Symbol;Acc:HGNC:13005]	0.746678	0.248219	1.58887		0.173934	0.248219	-0.513075
ENSG00000005175	RPAP3	RNA polymerase II associated protein 3 [Source:HGNC Symbol;Acc:HGNC:26151]	2.0762	0.690916	1.58736		0.59272	0.690916	-0.22116
ENSG00000151689	INPP1	inositol polyphosphate-1-phosphatase [Source:HGNC Symbol;Acc:HGNC:6071]	1.96775	0.655061	1.58684		0.576459	0.655061	-0.184413
ENSG00000102096	PIM2	Pim-2 proto-oncogene, serine/threonine kinase [Source:HGNC Symbol;Acc:HGNC:8987]	3.80593	1.26742	1.58636		1.54233	1.26742	0.283223
ENSG00000156232	WHAMM	WAS protein homolog associated with actin, golgi membranes and microtubules [Source:HGNC Symbol;Acc:HGNC:30493]	1.76632	0.588332	1.58604		0.791732	0.588332	0.428382
ENSG00000197119	SLC25A29	solute carrier family 25 (mitochondrial carnitine/acylcarnitine carrier), member 29 [Source:HGNC Symbol;Acc:HGNC:20116]	1.06699	0.355511	1.58557		0.34123	0.355511	-0.0591503
ENSG00000117868	ESYT2	extended synaptotagmin-like protein 2 [Source:HGNC Symbol;Acc:HGNC:22211]	4.42068	1.47573	1.58284		1.23895	1.47573	-0.252319
ENSG00000170364	SETMAR	SET domain and mariner transposase fusion gene [Source:HGNC Symbol;Acc:HGNC:10762]	0.713268	0.238704	1.57922		0.421933	0.238704	0.821793
ENSG00000198168	SVIP	small VCP/p97-interacting protein [Source:HGNC Symbol;Acc:HGNC:25238]	1.7824	0.598044	1.57549		0.485776	0.598044	-0.299962
ENSG00000240694	PNMA2	paraneoplastic Ma antigen 2 [Source:HGNC Symbol;Acc:HGNC:9159]	0.995407	0.335445	1.56921		0.255294	0.335445	-0.393919
ENSG00000120437	ACAT2	acetyl-CoA acetyltransferase 2 [Source:HGNC Symbol;Acc:HGNC:94]	2.57018	0.869677	1.56332		0.975031	0.869677	0.164969
ENSG00000133818	RRAS2	related RAS viral (r-ras) oncogene homolog 2 [Source:HGNC Symbol;Acc:HGNC:17271]	1.77692	0.601448	1.56287		0.550965	0.601448	-0.126479
ENSG00000183955	SETD8	SET domain containing (lysine methyltransferase) 8 [Source:HGNC Symbol;Acc:HGNC:29489]	2.53887	0.860218	1.56141		1.02897	0.860218	0.258432
ENSG00000169826	CSGALNACT2	chondroitin sulfate N-acetylgalactosaminyltransferase 2 [Source:HGNC Symbol;Acc:HGNC:24292]	2.40678	0.815706	1.56098		0.757727	0.815706	-0.10637
ENSG00000099617	EFNA2	ephrin-A2 [Source:HGNC Symbol;Acc:HGNC:3222]	1.66883	0.566424	1.55888		0.451273	0.566424	-0.327882
ENSG00000122140	MRPS2	mitochondrial ribosomal protein S2 [Source:HGNC Symbol;Acc:HGNC:14495]	1.21466	0.413352	1.55511		0.391771	0.413352	-0.0773598
ENSG00000198894	CIPC	CLOCK-interacting pacemaker [Source:HGNC Symbol;Acc:HGNC:20365]	1.51618	0.516507	1.55358		0.595497	0.516507	0.205305
ENSG00000167508	MVD	mevalonate (diphospho) decarboxylase [Source:HGNC Symbol;Acc:HGNC:7529]	1.98344	0.676418	1.55202		0.629768	0.676418	-0.103096
ENSG00000103005	USB1	U6 snRNA biogenesis 1 [Source:HGNC Symbol;Acc:HGNC:25792]	1.12079	0.383074	1.54882		0.483682	0.383074	0.336434
ENSG00000061337	LZTS1	leucine zipper, putative tumor suppressor 1 [Source:HGNC Symbol;Acc:HGNC:13861]	1.60232	0.548493	1.54661		0.418715	0.548493	-0.389507
ENSG00000116095	PLEKHA3	pleckstrin homology domain containing, family A (phosphoinositide binding specific) member 3 [Source:HGNC Symbol;Acc:HGNC:14338]	1.50982	0.517699	1.54419		0.692482	0.517699	0.419664
ENSG00000139826	ABHD13	abhydrolase domain containing 13 [Source:HGNC Symbol;Acc:HGNC:20293]	1.88734	0.648035	1.54221		0.81168	0.648035	0.324839
ENSG00000131459	GFPT2	glutamine-fructose-6-phosphate transaminase 2 [Source:HGNC Symbol;Acc:HGNC:4242]	2.59863	0.895689	1.53668		0.666166	0.895689	-0.427116
ENSG00000132334	PTPRE	protein tyrosine phosphatase, receptor type, E [Source:HGNC Symbol;Acc:HGNC:9669]	1.36357	0.470051	1.5365		0.674418	0.470051	0.520825
ENSG00000182022	CHST15	carbohydrate (N-acetylgalactosamine 4-sulfate 6-O) sulfotransferase 15 [Source:HGNC Symbol;Acc:HGNC:18137]	1.17118	0.404378	1.53419		0.612046	0.404378	0.597933
ENSG00000034152	MAP2K3	mitogen-activated protein kinase kinase 3 [Source:HGNC Symbol;Acc:HGNC:6843]	2.65397	0.916559	1.53385		0.862051	0.916559	-0.0884551
ENSG00000175592	FOSL1	FOS-like antigen 1 [Source:HGNC Symbol;Acc:HGNC:13718]	9.58141	3.31441	1.53148		1.0924	3.31441	-1.60125
ENSG00000109066	TMEM104	transmembrane protein 104 [Source:HGNC Symbol;Acc:HGNC:25984]	1.71927	0.596199	1.52793		0.581679	0.596199	-0.0355691
ENSG00000177054	ZDHHC13	zinc finger, DHHC-type containing 13 [Source:HGNC Symbol;Acc:HGNC:18413]	0.936439	0.325531	1.52439		0.38855	0.325531	0.255306
ENSG00000042429	MED17	mediator complex subunit 17 [Source:HGNC Symbol;Acc:HGNC:2375]	1.32234	0.459875	1.52378		0.734102	0.459875	0.674739
ENSG00000169427	KCNK9	potassium channel, two pore domain subfamily K, member 9 [Source:HGNC Symbol;Acc:HGNC:6283]	2.41538	0.840366	1.52316		1.30236	0.840366	0.632042
ENSG00000108559	NUP88	nucleoporin 88kDa [Source:HGNC Symbol;Acc:HGNC:8067]	1.85633	0.648207	1.51793		0.828289	0.648207	0.353679
ENSG00000104267	CA2	carbonic anhydrase II [Source:HGNC Symbol;Acc:HGNC:1373]	4.59677	1.60528	1.51779		1.38469	1.60528	-0.213262
ENSG00000179820	MYADM	myeloid-associated differentiation marker [Source:HGNC Symbol;Acc:HGNC:7544]	1.81566	0.634877	1.51594		0.821372	0.634877	0.371557
ENSG00000173166	RAPH1	Ras association (RalGDS/AF-6) and pleckstrin homology domains 1 [Source:HGNC Symbol;Acc:HGNC:14436]	2.08067	0.727546	1.51594		0.759572	0.727546	0.0621491
ENSG00000202566	MIR421	microRNA 421 [Source:HGNC Symbol;Acc:HGNC:32793]	0.757888	0.265147	1.51519		0.718315	0.265147	1.43782
ENSG00000069849	ATP1B3	ATPase, Na+/K+ transporting, beta 3 polypeptide [Source:HGNC Symbol;Acc:HGNC:806]	3.45917	1.2105	1.51482		1.27754	1.2105	0.0777646
ENSG00000143590	EFNA3	ephrin-A3 [Source:HGNC Symbol;Acc:HGNC:3223]	2.05631	0.721915	1.51016		0.583061	0.721915	-0.308182
ENSG00000123607	TTC21B	tetratricopeptide repeat domain 21B [Source:HGNC Symbol;Acc:HGNC:25660]	1.13784	0.399779	1.50902		0.447972	0.399779	0.164205
ENSG00000167695	FAM57A	family with sequence similarity 57, member A [Source:HGNC Symbol;Acc:HGNC:29646]	0.988067	0.348277	1.50437		0.286871	0.348277	-0.27983
ENSG00000167968	DNASE1L2	deoxyribonuclease I-like 2 [Source:HGNC Symbol;Acc:HGNC:2958]	1.00147	0.353457	1.50251		1.08287	0.353457	1.61525
ENSG00000008513	ST3GAL1	ST3 beta-galactoside alpha-2,3-sialyltransferase 1 [Source:HGNC Symbol;Acc:HGNC:10862]	1.69842	0.60037	1.50027		0.520589	0.60037	-0.205708
ENSG00000142065	ZFP14	ZFP14 zinc finger protein [Source:HGNC Symbol;Acc:HGNC:29312]	0.700863	0.247774	1.50011		0.313359	0.247774	0.338792
ENSG00000196588	MKL1	megakaryoblastic leukemia (translocation) 1 [Source:HGNC Symbol;Acc:HGNC:14334]	2.15952	0.763499	1.50001		0.841618	0.763499	0.14054
ENSG00000197483	ZNF628	zinc finger protein 628 [Source:HGNC Symbol;Acc:HGNC:28054]	2.33152	0.824955	1.49888		1.0875	0.824955	0.398621
ENSG00000022567	SLC45A4	solute carrier family 45, member 4 [Source:HGNC Symbol;Acc:HGNC:29196]	2.50837	0.887945	1.49821		0.702472	0.887945	-0.338029
ENSG00000181830	SLC35C1	solute carrier family 35 (GDP-fucose transporter), member C1 [Source:HGNC Symbol;Acc:HGNC:20197]	0.816749	0.289442	1.49662		0.310477	0.289442	0.101213
ENSG00000107443	CCNJ	cyclin J [Source:HGNC Symbol;Acc:HGNC:23434]	1.0254	0.363424	1.49646		0.486867	0.363424	0.421873
ENSG00000185818	NAT8L	N-acetyltransferase 8-like (GCN5-related, putative) [Source:HGNC Symbol;Acc:HGNC:26742]	1.24637	0.442302	1.49462		0.660283	0.442302	0.578054
ENSG00000165661	QSOX2	quiescin Q6 sulfhydryl oxidase 2 [Source:HGNC Symbol;Acc:HGNC:30249]	1.4074	0.499812	1.49358		0.457287	0.499812	-0.128285
ENSG00000177453	NIM1K	NIM1 serine/threonine protein kinase [Source:HGNC Symbol;Acc:HGNC:28646]	1.38404	0.494515	1.4848		1.07485	0.494515	1.12004
ENSG00000210176	MT-TH	mitochondrially encoded tRNA histidine [Source:HGNC Symbol;Acc:HGNC:7487]	1.32589	0.473785	1.48465		0.76534	0.473785	0.69187
ENSG00000215251	FASTKD5	FAST kinase domains 5 [Source:HGNC Symbol;Acc:HGNC:25790]	1.91944	0.686586	1.48317		0.716242	0.686586	0.0610064
ENSG00000101109	STK4	serine/threonine kinase 4 [Source:HGNC Symbol;Acc:HGNC:11408]	1.57282	0.562711	1.48289		0.74543	0.562711	0.405679
ENSG00000184675	AMER1	APC membrane recruitment protein 1 [Source:HGNC Symbol;Acc:HGNC:26837]	1.9572	0.701422	1.48043		0.854287	0.701422	0.284438
ENSG00000196850	PPTC7	PTC7 protein phosphatase homolog [Source:HGNC Symbol;Acc:HGNC:30695]	1.99658	0.716212	1.47907		0.858284	0.716212	0.261068
ENSG00000164169	PRMT9	protein arginine methyltransferase 9 [Source:HGNC Symbol;Acc:HGNC:25099]	2.36539	0.85193	1.47327		0.725637	0.85193	-0.231487
ENSG00000127824	TUBA4A	tubulin, alpha 4a [Source:HGNC Symbol;Acc:HGNC:12407]	2.02846	0.731432	1.47159		1.10402	0.731432	0.593967
ENSG00000169032	MAP2K1	mitogen-activated protein kinase kinase 1 [Source:HGNC Symbol;Acc:HGNC:6840]	2.91026	1.05032	1.47032		0.998633	1.05032	-0.0728038
ENSG00000126903	SLC10A3	solute carrier family 10, member 3 [Source:HGNC Symbol;Acc:HGNC:22979]	1.38984	0.501776	1.4698		0.401366	0.501776	-0.322128
ENSG00000147679	UTP23	UTP23, small subunit (SSU) processome component, homolog (yeast) [Source:HGNC Symbol;Acc:HGNC:28224]	0.913484	0.330222	1.46794		0.579761	0.330222	0.812021
ENSG00000178171	AMER3	APC membrane recruitment protein 3 [Source:HGNC Symbol;Acc:HGNC:26771]	0.618795	0.224067	1.46553		0.27392	0.224067	0.289822
ENSG00000169359	SLC33A1	solute carrier family 33 (acetyl-CoA transporter), member 1 [Source:HGNC Symbol;Acc:HGNC:95]	0.893769	0.324353	1.46234		0.620468	0.324353	0.935794
ENSG00000122386	ZNF205	zinc finger protein 205 [Source:HGNC Symbol;Acc:HGNC:12996]	1.14702	0.417686	1.4574		0.425817	0.417686	0.0278128
ENSG00000106009	BRAT1	BRCA1-associated ATM activator 1 [Source:HGNC Symbol;Acc:HGNC:21701]	0.858027	0.31314	1.45422		0.384391	0.31314	0.295769
ENSG00000100311	PDGFB	platelet-derived growth factor beta polypeptide [Source:HGNC Symbol;Acc:HGNC:8800]	2.44046	0.891656	1.45259		0.947555	0.891656	0.0877232
ENSG00000040199	PHLPP2	PH domain and leucine rich repeat protein phosphatase 2 [Source:HGNC Symbol;Acc:HGNC:29149]	1.55935	0.571616	1.44783		0.760834	0.571616	0.412535
ENSG00000181638	ZFP41	ZFP41 zinc finger protein [Source:HGNC Symbol;Acc:HGNC:26786]	0.817588	0.300056	1.44614		0.327191	0.300056	0.1249
ENSG00000122687	FTSJ2	FtsJ RNA methyltransferase homolog 2 (E. coli) [Source:HGNC Symbol;Acc:HGNC:16352]	0.664446	0.24464	1.44149		0.351891	0.24464	0.524465
ENSG00000171150	SOCS5	suppressor of cytokine signaling 5 [Source:HGNC Symbol;Acc:HGNC:16852]	1.54499	0.569989	1.43859		0.694208	0.569989	0.284434
ENSG00000112972	HMGCS1	3-hydroxy-3-methylglutaryl-CoA synthase 1 (soluble) [Source:HGNC Symbol;Acc:HGNC:5007]	3.8205	1.41105	1.43699		2.89429	1.41105	1.03644
ENSG00000141956	PRDM15	PR domain containing 15 [Source:HGNC Symbol;Acc:HGNC:13999]	1.48234	0.549067	1.43282		1.13037	0.549067	1.04174
ENSG00000221988	PPT2	palmitoyl-protein thioesterase 2 [Source:HGNC Symbol;Acc:HGNC:9326]	1.7985	0.666988	1.43106		0.72985	0.666988	0.12994
ENSG00000181315	ZNF322	zinc finger protein 322 [Source:HGNC Symbol;Acc:HGNC:23640]	1.05562	0.391551	1.43081		0.531368	0.391551	0.440511
ENSG00000171488	LRRC8C	leucine rich repeat containing 8 family, member C [Source:HGNC Symbol;Acc:HGNC:25075]	3.00058	1.11389	1.42963		1.03031	1.11389	-0.112535
ENSG00000198746	GPATCH3	G patch domain containing 3 [Source:HGNC Symbol;Acc:HGNC:25720]	1.2096	0.44942	1.42839		0.844578	0.44942	0.910168
ENSG00000171865	RNASEH1	ribonuclease H1 [Source:HGNC Symbol;Acc:HGNC:18466]	0.761493	0.283133	1.42735		0.345372	0.283133	0.286671
ENSG00000151617	EDNRA	endothelin receptor type A [Source:HGNC Symbol;Acc:HGNC:3179]	2.43249	0.905802	1.42517		0.61846	0.905802	-0.550515
ENSG00000107554	DNMBP	dynamin binding protein [Source:HGNC Symbol;Acc:HGNC:30373]	2.32435	0.866293	1.4239		0.921101	0.866293	0.0885042
ENSG00000114796	KLHL24	kelch-like family member 24 [Source:HGNC Symbol;Acc:HGNC:25947]	1.61169	0.60188	1.42102		1.07079	0.60188	0.831132
ENSG00000160191	PDE9A	phosphodiesterase 9A [Source:HGNC Symbol;Acc:HGNC:8795]	1.44702	0.540787	1.41995		0.695659	0.540787	0.36332
ENSG00000164949	GEM	GTP binding protein overexpressed in skeletal muscle [Source:HGNC Symbol;Acc:HGNC:4234]	24.8533	9.29726	1.41856		3.63899	9.29726	-1.35327
ENSG00000100784	RPS6KA5	ribosomal protein S6 kinase, 90kDa, polypeptide 5 [Source:HGNC Symbol;Acc:HGNC:10434]	1.86866	0.700152	1.41626		0.468808	0.700152	-0.578671
ENSG00000196581	AJAP1	adherens junctions associated protein 1 [Source:HGNC Symbol;Acc:HGNC:30801]	1.7418	0.654479	1.41216		0.674251	0.654479	0.0429373
ENSG00000171368	TPPP	tubulin polymerization promoting protein [Source:HGNC Symbol;Acc:HGNC:24164]	1.63913	0.616511	1.41073		0.496494	0.616511	-0.312351
ENSG00000160908	ZNF394	zinc finger protein 394 [Source:HGNC Symbol;Acc:HGNC:18832]	1.23201	0.463426	1.41061		0.693734	0.463426	0.582042
ENSG00000087448	KLHL42	kelch-like family member 42 [Source:HGNC Symbol;Acc:HGNC:29252]	0.988749	0.372042	1.41014		0.616429	0.372042	0.72847
ENSG00000105447	GRWD1	glutamate-rich WD repeat containing 1 [Source:HGNC Symbol;Acc:HGNC:21270]	1.32097	0.498206	1.40678		0.540759	0.498206	0.118244
ENSG00000261609	GAN	gigaxonin [Source:HGNC Symbol;Acc:HGNC:4137]	1.82656	0.689204	1.40613		0.782479	0.689204	0.18312
ENSG00000134758	RNF138	ring finger protein 138, E3 ubiquitin protein ligase [Source:HGNC Symbol;Acc:HGNC:17765]	1.71221	0.646349	1.40547		0.754192	0.646349	0.222618
ENSG00000234616	JRK	Jrk helix-turn-helix protein [Source:HGNC Symbol;Acc:HGNC:6199]	0.608345	0.230259	1.40163		0.213325	0.230259	-0.110207
ENSG00000197147	LRRC8B	leucine rich repeat containing 8 family, member B [Source:HGNC Symbol;Acc:HGNC:30692]	2.16333	0.822778	1.39468		0.890158	0.822778	0.113558
ENSG00000156427	FGF18	fibroblast growth factor 18 [Source:HGNC Symbol;Acc:HGNC:3674]	0.632685	0.240836	1.39344		0.253399	0.240836	0.0733598
ENSG00000101188	NTSR1	neurotensin receptor 1 (high affinity) [Source:HGNC Symbol;Acc:HGNC:8039]	1.45886	0.555647	1.3926		0.266909	0.555647	-1.05782
ENSG00000169902	TPST1	tyrosylprotein sulfotransferase 1 [Source:HGNC Symbol;Acc:HGNC:12020]	1.92699	0.734801	1.39092		0.617928	0.734801	-0.249915
ENSG00000114450	GNB4	guanine nucleotide binding protein (G protein), beta polypeptide 4 [Source:HGNC Symbol;Acc:HGNC:20731]	2.05741	0.786017	1.38819		0.786908	0.786017	0.00163351
ENSG00000138031	ADCY3	adenylate cyclase 3 [Source:HGNC Symbol;Acc:HGNC:234]	1.36588	0.522141	1.38732		0.580459	0.522141	0.152753
ENSG00000178233	TMEM151B	transmembrane protein 151B [Source:HGNC Symbol;Acc:HGNC:21315]	1.78823	0.684312	1.38581		0.923028	0.684312	0.43172
ENSG00000125772	GPCPD1	glycerophosphocholine phosphodiesterase 1 [Source:HGNC Symbol;Acc:HGNC:26957]	1.82851	0.700089	1.38506		0.698504	0.700089	-0.00327067
ENSG00000154127	UBASH3B	ubiquitin associated and SH3 domain containing B [Source:HGNC Symbol;Acc:HGNC:29884]	2.41181	0.923635	1.38472		0.79756	0.923635	-0.211731
ENSG00000134709	HOOK1	hook microtubule-tethering protein 1 [Source:HGNC Symbol;Acc:HGNC:19884]	1.37915	0.52888	1.38277		0.526483	0.52888	-0.00655253
ENSG00000218891	ZNF579	zinc finger protein 579 [Source:HGNC Symbol;Acc:HGNC:26646]	1.32152	0.507208	1.38155		0.63706	0.507208	0.328851
ENSG00000138617	PARP16	poly (ADP-ribose) polymerase family, member 16 [Source:HGNC Symbol;Acc:HGNC:26040]	0.598646	0.229796	1.38135		0.258951	0.229796	0.172326
ENSG00000149295	DRD2	dopamine receptor D2 [Source:HGNC Symbol;Acc:HGNC:3023]	1.12081	0.430821	1.37939		0.467075	0.430821	0.116567
ENSG00000047056	WDR37	WD repeat domain 37 [Source:HGNC Symbol;Acc:HGNC:31406]	1.8353	0.706421	1.37742		0.767152	0.706421	0.118983
ENSG00000185477	GPRIN3	GPRIN family member 3 [Source:HGNC Symbol;Acc:HGNC:27733]	1.23709	0.476662	1.37591		0.674132	0.476662	0.500064
ENSG00000010295	IFFO1	intermediate filament family orphan 1 [Source:HGNC Symbol;Acc:HGNC:24970]	1.49112	0.574923	1.37495		0.584522	0.574923	0.0238878
ENSG00000006194	ZNF263	zinc finger protein 263 [Source:HGNC Symbol;Acc:HGNC:13056]	1.76549	0.680757	1.37485		1.07525	0.680757	0.659463
ENSG00000171451	DSEL	dermatan sulfate epimerase-like [Source:HGNC Symbol;Acc:HGNC:18144]	2.50684	0.96702	1.37425		1.06221	0.96702	0.135445
ENSG00000183655	KLHL25	kelch-like family member 25 [Source:HGNC Symbol;Acc:HGNC:25732]	1.21486	0.468832	1.37365		0.635923	0.468832	0.439781
ENSG00000114745	GORASP1	golgi reassembly stacking protein 1, 65kDa [Source:HGNC Symbol;Acc:HGNC:16769]	1.73314	0.668873	1.37359		0.559169	0.668873	-0.258448
ENSG00000204386	NEU1	sialidase 1 (lysosomal sialidase) [Source:HGNC Symbol;Acc:HGNC:7758]	1.96031	0.757553	1.37166		1.06507	0.757553	0.491525
ENSG00000103066	PLA2G15	phospholipase A2, group XV [Source:HGNC Symbol;Acc:HGNC:17163]	1.71532	0.663283	1.37078		0.531689	0.663283	-0.319041
ENSG00000154370	TRIM11	tripartite motif containing 11 [Source:HGNC Symbol;Acc:HGNC:16281]	1.59084	0.615351	1.37031		0.790028	0.615351	0.360496
ENSG00000253710	ALG11	ALG11, alpha-1,2-mannosyltransferase [Source:HGNC Symbol;Acc:HGNC:32456]	0.967597	0.374734	1.36854		0.576132	0.374734	0.620534
ENSG00000148331	ASB6	ankyrin repeat and SOCS box containing 6 [Source:HGNC Symbol;Acc:HGNC:17181]	1.35115	0.524361	1.36556		0.907873	0.524361	0.79193
ENSG00000166478	ZNF143	zinc finger protein 143 [Source:HGNC Symbol;Acc:HGNC:12928]	2.13216	0.829179	1.36256		1.20143	0.829179	0.534994
ENSG00000125650	PSPN	persephin [Source:HGNC Symbol;Acc:HGNC:9579]	2.04656	0.799268	1.35645		0.731716	0.799268	-0.127394
ENSG00000106351	AGFG2	ArfGAP with FG repeats 2 [Source:HGNC Symbol;Acc:HGNC:5177]	1.2904	0.504052	1.35617		0.503191	0.504052	-0.00246646
ENSG00000078269	SYNJ2	synaptojanin 2 [Source:HGNC Symbol;Acc:HGNC:11504]	2.16054	0.844134	1.35585		0.977848	0.844134	0.212138
ENSG00000197024	ZNF398	zinc finger protein 398 [Source:HGNC Symbol;Acc:HGNC:18373]	1.08697	0.425141	1.35429		0.615782	0.425141	0.534477
ENSG00000171813	PWWP2B	PWWP domain containing 2B [Source:HGNC Symbol;Acc:HGNC:25150]	3.2484	1.27085	1.35394		1.63558	1.27085	0.364016
ENSG00000099958	DERL3	derlin 3 [Source:HGNC Symbol;Acc:HGNC:14236]	2.3523	0.920405	1.35373		1.14237	0.920405	0.31169
ENSG00000206432	TMEM200C	transmembrane protein 200C [Source:HGNC Symbol;Acc:HGNC:37208]	1.45782	0.570648	1.35314		0.361884	0.570648	-0.657076
ENSG00000131871	VIMP	VCP-interacting membrane selenoprotein [Source:HGNC Symbol;Acc:HGNC:30396]	1.69448	0.66488	1.34968		0.825349	0.66488	0.31191
ENSG00000101189	MRGBP	MRG/MORF4L binding protein [Source:HGNC Symbol;Acc:HGNC:15866]	0.987051	0.388471	1.34532		0.517387	0.388471	0.413438
ENSG00000070961	ATP2B1	ATPase, Ca++ transporting, plasma membrane 1 [Source:HGNC Symbol;Acc:HGNC:814]	2.54808	1.00479	1.34252		1.65718	1.00479	0.721844
ENSG00000135900	MRPL44	mitochondrial ribosomal protein L44 [Source:HGNC Symbol;Acc:HGNC:16650]	1.03433	0.407875	1.3425		0.522813	0.407875	0.358169
ENSG00000259330	INAFM2	InaF-motif containing 2 [Source:HGNC Symbol;Acc:HGNC:35165]	1.01803	0.402509	1.33869		0.643304	0.402509	0.676479
ENSG00000173376	NDNF	neuron-derived neurotrophic factor [Source:HGNC Symbol;Acc:HGNC:26256]	1.23835	0.490694	1.33552		0.568169	0.490694	0.211496
ENSG00000198315	ZKSCAN8	zinc finger with KRAB and SCAN domains 8 [Source:HGNC Symbol;Acc:HGNC:12983]	1.11347	0.441435	1.33479		0.290295	0.441435	-0.604683
ENSG00000213638	ADAT3	adenosine deaminase, tRNA-specific 3 [Source:HGNC Symbol;Acc:HGNC:25151]	1.76825	0.701595	1.33362		1.38817	0.701595	0.984472
ENSG00000135631	RAB11FIP5	RAB11 family interacting protein 5 (class I) [Source:HGNC Symbol;Acc:HGNC:24845]	2.49646	0.993581	1.32918		0.782393	0.993581	-0.344744
ENSG00000079459	FDFT1	farnesyl-diphosphate farnesyltransferase 1 [Source:HGNC Symbol;Acc:HGNC:3629]	2.50755	0.998596	1.3283		0.890558	0.998596	-0.165191
ENSG00000134109	EDEM1	ER degradation enhancer, mannosidase alpha-like 1 [Source:HGNC Symbol;Acc:HGNC:18967]	1.42098	0.566634	1.3264		0.674394	0.566634	0.251176
ENSG00000113456	RAD1	RAD1 checkpoint DNA exonuclease [Source:HGNC Symbol;Acc:HGNC:9806]	1.21435	0.484668	1.32512		0.49373	0.484668	0.0267247
ENSG00000159256	MORC3	MORC family CW-type zinc finger 3 [Source:HGNC Symbol;Acc:HGNC:23572]	1.2515	0.499576	1.32488		0.70874	0.499576	0.504553
ENSG00000129355	CDKN2D	cyclin-dependent kinase inhibitor 2D (p19, inhibits CDK4) [Source:HGNC Symbol;Acc:HGNC:1790]	1.69587	0.677984	1.3227		0.606187	0.677984	-0.161486
ENSG00000108064	TFAM	transcription factor A, mitochondrial [Source:HGNC Symbol;Acc:HGNC:11741]	1.09072	0.436386	1.3216		0.525341	0.436386	0.267649
ENSG00000108557	RAI1	retinoic acid induced 1 [Source:HGNC Symbol;Acc:HGNC:9834]	1.46914	0.588346	1.32024		0.719535	0.588346	0.2904
ENSG00000133687	TMTC1	transmembrane and tetratricopeptide repeat containing 1 [Source:HGNC Symbol;Acc:HGNC:24099]	1.53692	0.615512	1.32018		0.548681	0.615512	-0.165819
ENSG00000178951	ZBTB7A	zinc finger and BTB domain containing 7A [Source:HGNC Symbol;Acc:HGNC:18078]	1.22612	0.491136	1.31991		0.888293	0.491136	0.854913
ENSG00000162992	NEUROD1	neuronal differentiation 1 [Source:HGNC Symbol;Acc:HGNC:7762]	0.740259	0.296983	1.31765		0.507156	0.296983	0.772048
ENSG00000052749	RRP12	ribosomal RNA processing 12 homolog [Source:HGNC Symbol;Acc:HGNC:29100]	1.54141	0.619874	1.3142		0.56191	0.619874	-0.141634
ENSG00000152944	MED21	mediator complex subunit 21 [Source:HGNC Symbol;Acc:HGNC:11473]	2.13615	0.859464	1.3135		0.56221	0.859464	-0.612327
ENSG00000142279	WTIP	Wilms tumor 1 interacting protein [Source:HGNC Symbol;Acc:HGNC:20964]	1.4482	0.583911	1.31044		0.610155	0.583911	0.0634293
ENSG00000119630	PGF	placental growth factor [Source:HGNC Symbol;Acc:HGNC:8893]	0.886833	0.358127	1.30819		0.419011	0.358127	0.226517
ENSG00000148154	UGCG	UDP-glucose ceramide glucosyltransferase [Source:HGNC Symbol;Acc:HGNC:12524]	1.83046	0.739644	1.3073		1.03201	0.739644	0.480559
ENSG00000157538	DSCR3	Down syndrome critical region 3 [Source:HGNC Symbol;Acc:HGNC:3044]	1.43043	0.578584	1.30585		0.628629	0.578584	0.119683
ENSG00000130479	MAP1S	microtubule-associated protein 1S [Source:HGNC Symbol;Acc:HGNC:15715]	1.73645	0.702952	1.30464		0.808892	0.702952	0.20252
ENSG00000165724	ZMYND19	zinc finger, MYND-type containing 19 [Source:HGNC Symbol;Acc:HGNC:21146]	1.72397	0.698151	1.30412		0.85051	0.698151	0.284788
ENSG00000122012	SV2C	synaptic vesicle glycoprotein 2C [Source:HGNC Symbol;Acc:HGNC:30670]	4.00274	1.62309	1.30224		5.82812	1.62309	1.84428
ENSG00000143842	SOX13	SRY (sex determining region Y)-box 13 [Source:HGNC Symbol;Acc:HGNC:11192]	0.786224	0.318981	1.30147		0.386328	0.318981	0.276355
ENSG00000115641	FHL2	four and a half LIM domains 2 [Source:HGNC Symbol;Acc:HGNC:3703]	2.7697	1.12457	1.30036		0.88751	1.12457	-0.341533
ENSG00000138622	HCN4	hyperpolarization activated cyclic nucleotide gated potassium channel 4 [Source:HGNC Symbol;Acc:HGNC:16882]	1.22921	0.500047	1.2976		0.73788	0.500047	0.561322
ENSG00000177374	HIC1	hypermethylated in cancer 1 [Source:HGNC Symbol;Acc:HGNC:4909]	4.38006	1.7821	1.29738		1.50751	1.7821	-0.24141
ENSG00000183114	FAM43B	family with sequence similarity 43, member B [Source:HGNC Symbol;Acc:HGNC:31791]	0.693827	0.282395	1.29686		0.212971	0.282395	-0.407059
ENSG00000008853	RHOBTB2	Rho-related BTB domain containing 2 [Source:HGNC Symbol;Acc:HGNC:18756]	1.43188	0.583298	1.2956		0.855817	0.583298	0.55307
ENSG00000106635	BCL7B	B-cell CLL/lymphoma 7B [Source:HGNC Symbol;Acc:HGNC:1005]	1.27373	0.519603	1.29358		0.760792	0.519603	0.550093
ENSG00000196352	CD55	CD55 molecule, decay accelerating factor for complement (Cromer blood group) [Source:HGNC Symbol;Acc:HGNC:2665]	2.6271	1.07331	1.2914		1.05319	1.07331	-0.0272979
ENSG00000134508	CABLES1	Cdk5 and Abl enzyme substrate 1 [Source:HGNC Symbol;Acc:HGNC:25097]	1.11191	0.454472	1.29078		0.568269	0.454472	0.322384
ENSG00000072401	UBE2D1	ubiquitin-conjugating enzyme E2D 1 [Source:HGNC Symbol;Acc:HGNC:12474]	1.55042	0.633736	1.2907		0.53104	0.633736	-0.255062
ENSG00000160233	LRRC3	leucine rich repeat containing 3 [Source:HGNC Symbol;Acc:HGNC:14965]	1.32295	0.540998	1.29007		0.339994	0.540998	-0.670114
ENSG00000134531	EMP1	epithelial membrane protein 1 [Source:HGNC Symbol;Acc:HGNC:3333]	10.3801	4.2454	1.28984		1.71029	4.2454	-1.31166
ENSG00000103018	CYB5B	cytochrome b5 type B (outer mitochondrial membrane) [Source:HGNC Symbol;Acc:HGNC:24374]	2.1008	0.859447	1.28946		0.892116	0.859447	0.0538236
ENSG00000100426	ZBED4	zinc finger, BED-type containing 4 [Source:HGNC Symbol;Acc:HGNC:20721]	0.980378	0.401258	1.28881		0.604125	0.401258	0.590315
ENSG00000176619	LMNB2	lamin B2 [Source:HGNC Symbol;Acc:HGNC:6638]	1.79084	0.733395	1.28798		0.874633	0.733395	0.254088
ENSG00000170619	COMMD5	COMM domain containing 5 [Source:HGNC Symbol;Acc:HGNC:17902]	0.96796	0.397521	1.28392		0.410057	0.397521	0.0447939
ENSG00000135048	TMEM2	transmembrane protein 2 [Source:HGNC Symbol;Acc:HGNC:11869]	2.53953	1.04312	1.28365		0.927918	1.04312	-0.168842
ENSG00000180667	YOD1	YOD1 deubiquitinase [Source:HGNC Symbol;Acc:HGNC:25035]	1.83511	0.754212	1.28283		0.928551	0.754212	0.300011
ENSG00000182827	ACBD3	acyl-CoA binding domain containing 3 [Source:HGNC Symbol;Acc:HGNC:15453]	1.33539	0.549217	1.28181		0.678396	0.549217	0.304751
ENSG00000188167	TMPPE	transmembrane protein with metallophosphoesterase domain [Source:HGNC Symbol;Acc:HGNC:33865]	1.24435	0.512234	1.28052		0.618354	0.512234	0.271632
ENSG00000177839	PCDHB9	protocadherin beta 9 [Source:HGNC Symbol;Acc:HGNC:8694]	1.76609	0.727691	1.27916		1.15166	0.727691	0.662314
ENSG00000164933	SLC25A32	solute carrier family 25 (mitochondrial folate carrier), member 32 [Source:HGNC Symbol;Acc:HGNC:29683]	1.49074	0.615084	1.27717		0.725015	0.615084	0.237229
ENSG00000185989	RASA3	RAS p21 protein activator 3 [Source:HGNC Symbol;Acc:HGNC:20331]	1.12077	0.462492	1.27699		0.512076	0.462492	0.14693
ENSG00000070444	MNT	MAX network transcriptional repressor [Source:HGNC Symbol;Acc:HGNC:7188]	2.00474	0.827674	1.27628		1.25481	0.827674	0.600338
ENSG00000126261	UBA2	ubiquitin-like modifier activating enzyme 2 [Source:HGNC Symbol;Acc:HGNC:30661]	1.72725	0.713962	1.27456		0.826077	0.713962	0.210429
ENSG00000153487	ING1	inhibitor of growth family, member 1 [Source:HGNC Symbol;Acc:HGNC:6062]	2.18026	0.902017	1.27327		1.19495	0.902017	0.405723
ENSG00000126003	PLAGL2	pleiomorphic adenoma gene-like 2 [Source:HGNC Symbol;Acc:HGNC:9047]	1.51848	0.628315	1.27307		0.877805	0.628315	0.482412
ENSG00000104140	RHOV	ras homolog family member V [Source:HGNC Symbol;Acc:HGNC:18313]	0.955483	0.395943	1.27094		0.248122	0.395943	-0.674241
ENSG00000183624	HMCES	5-hydroxymethylcytosine (hmC) binding, ES cell-specific [Source:HGNC Symbol;Acc:HGNC:24446]	2.04605	0.849485	1.26818		0.791743	0.849485	-0.101555
ENSG00000011105	TSPAN9	tetraspanin 9 [Source:HGNC Symbol;Acc:HGNC:21640]	2.17707	0.90392	1.26812		0.792176	0.90392	-0.190374
ENSG00000169926	KLF13	Kruppel-like factor 13 [Source:HGNC Symbol;Acc:HGNC:13672]	1.72347	0.716326	1.26663		0.952551	0.716326	0.41118
ENSG00000168395	ING5	inhibitor of growth family, member 5 [Source:HGNC Symbol;Acc:HGNC:19421]	1.0926	0.454931	1.26404		0.78913	0.454931	0.794617
ENSG00000083799	CYLD	cylindromatosis (turban tumor syndrome) [Source:HGNC Symbol;Acc:HGNC:2584]	1.73668	0.723644	1.26298		0.612844	0.723644	-0.23976
ENSG00000168061	SAC3D1	SAC3 domain containing 1 [Source:HGNC Symbol;Acc:HGNC:30179]	1.15624	0.482917	1.25959		0.602762	0.482917	0.319813
ENSG00000116525	TRIM62	tripartite motif containing 62 [Source:HGNC Symbol;Acc:HGNC:25574]	1.19477	0.499601	1.25788		0.487253	0.499601	-0.0361047
ENSG00000177427	MIEF2	mitochondrial elongation factor 2 [Source:HGNC Symbol;Acc:HGNC:17920]	0.986669	0.412774	1.25721		0.351088	0.412774	-0.233518
ENSG00000122966	CIT	citron rho-interacting serine/threonine kinase [Source:HGNC Symbol;Acc:HGNC:1985]	1.43597	0.600918	1.25679		0.849163	0.600918	0.498874
ENSG00000069998	CECR5	cat eye syndrome chromosome region, candidate 5 [Source:HGNC Symbol;Acc:HGNC:1843]	1.23987	0.518913	1.25663		0.610165	0.518913	0.233706
ENSG00000132801	ZSWIM3	zinc finger, SWIM-type containing 3 [Source:HGNC Symbol;Acc:HGNC:16157]	0.495344	0.207703	1.25391		0.311671	0.207703	0.585505
ENSG00000008283	CYB561	cytochrome b561 [Source:HGNC Symbol;Acc:HGNC:2571]	1.62314	0.68077	1.25355		0.407232	0.68077	-0.741319
ENSG00000103540	CCP110	centriolar coiled coil protein 110kDa [Source:HGNC Symbol;Acc:HGNC:24342]	1.38066	0.579299	1.25298		0.693461	0.579299	0.259505
ENSG00000103264	FBXO31	F-box protein 31 [Source:HGNC Symbol;Acc:HGNC:16510]	1.64117	0.689034	1.25208		0.589598	0.689034	-0.224844
ENSG00000101745	ANKRD12	ankyrin repeat domain 12 [Source:HGNC Symbol;Acc:HGNC:29135]	1.55163	0.653274	1.24803		1.17106	0.653274	0.842055
ENSG00000170500	LONRF2	LON peptidase N-terminal domain and ring finger 2 [Source:HGNC Symbol;Acc:HGNC:24788]	1.57496	0.663127	1.24796		0.670446	0.663127	0.0158345
ENSG00000187486	KCNJ11	potassium channel, inwardly rectifying subfamily J, member 11 [Source:HGNC Symbol;Acc:HGNC:6257]	1.03213	0.435142	1.24607		0.247178	0.435142	-0.815934
ENSG00000099804	CDC34	cell division cycle 34 [Source:HGNC Symbol;Acc:HGNC:1734]	1.93416	0.815899	1.24525		0.92823	0.815899	0.186091
ENSG00000168275	COA6	cytochrome c oxidase assembly factor 6 [Source:HGNC Symbol;Acc:HGNC:18025]	1.60086	0.675333	1.24517		0.672455	0.675333	-0.00616161
ENSG00000139496	NUPL1	nucleoporin like 1 [Source:HGNC Symbol;Acc:HGNC:20261]	1.95253	0.824269	1.24416		0.969902	0.824269	0.234725
ENSG00000220008	LINGO3	leucine rich repeat and Ig domain containing 3 [Source:HGNC Symbol;Acc:HGNC:21206]	0.935099	0.39492	1.24356		0.352655	0.39492	-0.1633
ENSG00000153113	CAST	calpastatin [Source:HGNC Symbol;Acc:HGNC:1515]	4.23281	1.78866	1.24274		1.20746	1.78866	-0.566902
ENSG00000081189	MEF2C	myocyte enhancer factor 2C [Source:HGNC Symbol;Acc:HGNC:6996]	2.88961	1.22157	1.24213		1.13314	1.22157	-0.10841
ENSG00000108179	PPIF	peptidylprolyl isomerase F [Source:HGNC Symbol;Acc:HGNC:9259]	1.72925	0.731235	1.24174		0.62394	0.731235	-0.228928
ENSG00000262919	FAM58A	family with sequence similarity 58, member A [Source:HGNC Symbol;Acc:HGNC:28434]	1.23989	0.524955	1.23995		0.415348	0.524955	-0.337873
ENSG00000008256	CYTH3	cytohesin 3 [Source:HGNC Symbol;Acc:HGNC:9504]	1.54994	0.656301	1.23978		0.578169	0.656301	-0.182868
ENSG00000168490	PHYHIP	phytanoyl-CoA 2-hydroxylase interacting protein [Source:HGNC Symbol;Acc:HGNC:16865]	1.77453	0.751753	1.23911		0.786287	0.751753	0.0647968
ENSG00000136856	SLC2A8	solute carrier family 2 (facilitated glucose transporter), member 8 [Source:HGNC Symbol;Acc:HGNC:13812]	1.26157	0.534889	1.2379		0.667088	0.534889	0.318636
ENSG00000155275	TRMT44	tRNA methyltransferase 44 homolog (S. cerevisiae) [Source:HGNC Symbol;Acc:HGNC:26653]	1.41971	0.602427	1.23674		0.838711	0.602427	0.477388
ENSG00000131409	LRRC4B	leucine rich repeat containing 4B [Source:HGNC Symbol;Acc:HGNC:25042]	1.15862	0.491743	1.23644		0.705058	0.491743	0.519837
ENSG00000023909	GCLM	glutamate-cysteine ligase, modifier subunit [Source:HGNC Symbol;Acc:HGNC:4312]	1.78059	0.75652	1.2349		0.627451	0.75652	-0.269876
ENSG00000114956	DGUOK	deoxyguanosine kinase [Source:HGNC Symbol;Acc:HGNC:2858]	1.02127	0.433978	1.23467		0.381704	0.433978	-0.18517
ENSG00000143494	VASH2	vasohibin 2 [Source:HGNC Symbol;Acc:HGNC:25723]	1.24785	0.530514	1.23398		0.589632	0.530514	0.152423
ENSG00000244274	DBNDD2	dysbindin (dystrobrevin binding protein 1) domain containing 2 [Source:HGNC Symbol;Acc:HGNC:15881]	1.4909	0.634246	1.23307		1.04359	0.634246	0.718436
ENSG00000186352	ANKRD37	ankyrin repeat domain 37 [Source:HGNC Symbol;Acc:HGNC:29593]	1.20539	0.513316	1.23158		0.777603	0.513316	0.599186
ENSG00000132975	GPR12	G protein-coupled receptor 12 [Source:HGNC Symbol;Acc:HGNC:4466]	0.800579	0.34096	1.23144		0.224525	0.34096	-0.602725
ENSG00000148572	NRBF2	nuclear receptor binding factor 2 [Source:HGNC Symbol;Acc:HGNC:19692]	1.32436	0.564786	1.22952		0.637394	0.564786	0.174481
ENSG00000141542	RAB40B	RAB40B, member RAS oncogene family [Source:HGNC Symbol;Acc:HGNC:18284]	1.23331	0.527601	1.22502		0.400716	0.527601	-0.396867
ENSG00000140950	TLDC1	TBC/LysM-associated domain containing 1 [Source:HGNC Symbol;Acc:HGNC:29325]	0.989948	0.4235	1.22499		0.301152	0.4235	-0.491868
ENSG00000110108	TMEM109	transmembrane protein 109 [Source:HGNC Symbol;Acc:HGNC:28771]	1.09894	0.470906	1.22261		0.74625	0.470906	0.664222
ENSG00000163376	KBTBD8	kelch repeat and BTB (POZ) domain containing 8 [Source:HGNC Symbol;Acc:HGNC:30691]	0.54501	0.23357	1.22243		0.508863	0.23357	1.12342
ENSG00000120137	PANK3	pantothenate kinase 3 [Source:HGNC Symbol;Acc:HGNC:19365]	1.95457	0.837834	1.22212		1.15636	0.837834	0.464853
ENSG00000204315	FKBPL	FK506 binding protein like [Source:HGNC Symbol;Acc:HGNC:13949]	1.22229	0.523943	1.2221		0.597437	0.523943	0.189375
ENSG00000112130	RNF8	ring finger protein 8, E3 ubiquitin protein ligase [Source:HGNC Symbol;Acc:HGNC:10071]	1.36297	0.58456	1.22134		0.74905	0.58456	0.357711
ENSG00000135974	C2orf49	chromosome 2 open reading frame 49 [Source:HGNC Symbol;Acc:HGNC:28772]	1.43868	0.617548	1.22012		0.671983	0.617548	0.121875
ENSG00000167680	SEMA6B	sema domain, transmembrane domain (TM), and cytoplasmic domain, (semaphorin) 6B [Source:HGNC Symbol;Acc:HGNC:10739]	1.59136	0.684181	1.21781		0.508865	0.684181	-0.427096
ENSG00000100281	HMGXB4	HMG box domain containing 4 [Source:HGNC Symbol;Acc:HGNC:5003]	0.822548	0.354269	1.21525		0.564265	0.354269	0.671525
ENSG00000164244	PRRC1	proline-rich coiled-coil 1 [Source:HGNC Symbol;Acc:HGNC:28164]	1.34291	0.578746	1.21436		0.63811	0.578746	0.140875
ENSG00000146856	AGBL3	ATP/GTP binding protein-like 3 [Source:HGNC Symbol;Acc:HGNC:27981]	1.57678	0.679918	1.21355		0.790517	0.679918	0.217434
ENSG00000156097	GPR61	G protein-coupled receptor 61 [Source:HGNC Symbol;Acc:HGNC:13300]	0.667408	0.287816	1.21342		0.345237	0.287816	0.26244
ENSG00000090470	PDCD7	programmed cell death 7 [Source:HGNC Symbol;Acc:HGNC:8767]	0.870635	0.375613	1.21282		0.763817	0.375613	1.02398
ENSG00000169710	FASN	fatty acid synthase [Source:HGNC Symbol;Acc:HGNC:3594]	2.07984	0.89771	1.21215		0.721178	0.89771	-0.315894
ENSG00000088205	DDX18	DEAD (Asp-Glu-Ala-Asp) box polypeptide 18 [Source:HGNC Symbol;Acc:HGNC:2741]	1.16774	0.504048	1.21209		0.558919	0.504048	0.149079
ENSG00000103121	CMC2	C-x(9)-C motif containing 2 [Source:HGNC Symbol;Acc:HGNC:24447]	2.20425	0.952098	1.21111		0.667113	0.952098	-0.513178
ENSG00000124225	PMEPA1	prostate transmembrane protein, androgen induced 1 [Source:HGNC Symbol;Acc:HGNC:14107]	4.90643	2.12056	1.21023		2.0124	2.12056	-0.0755272
ENSG00000136940	PDCL	phosducin-like [Source:HGNC Symbol;Acc:HGNC:8770]	1.25855	0.543952	1.21022		0.659093	0.543952	0.277003
ENSG00000197063	MAFG	v-maf avian musculoaponeurotic fibrosarcoma oncogene homolog G [Source:HGNC Symbol;Acc:HGNC:6781]	2.43027	1.05046	1.2101		1.62306	1.05046	0.627698
ENSG00000110921	MVK	mevalonate kinase [Source:HGNC Symbol;Acc:HGNC:7530]	2.13996	0.925189	1.20976		0.711396	0.925189	-0.379094
ENSG00000131873	CHSY1	chondroitin sulfate synthase 1 [Source:HGNC Symbol;Acc:HGNC:17198]	2.12409	0.919588	1.20778		1.02274	0.919588	0.153379
ENSG00000176915	ANKLE2	ankyrin repeat and LEM domain containing 2 [Source:HGNC Symbol;Acc:HGNC:29101]	1.44175	0.624556	1.20692		0.7559	0.624556	0.275363
ENSG00000184986	TMEM121	transmembrane protein 121 [Source:HGNC Symbol;Acc:HGNC:20511]	1.03814	0.449885	1.20637		0.429102	0.449885	-0.0682361
ENSG00000115421	PAPOLG	poly(A) polymerase gamma [Source:HGNC Symbol;Acc:HGNC:14982]	0.828251	0.358959	1.20625		0.505636	0.358959	0.494278
ENSG00000198912	C1orf174	chromosome 1 open reading frame 174 [Source:HGNC Symbol;Acc:HGNC:27915]	1.01924	0.441766	1.20615		0.49475	0.441766	0.163418
ENSG00000136274	NACAD	NAC alpha domain containing [Source:HGNC Symbol;Acc:HGNC:22196]	0.845978	0.367036	1.2047		0.431642	0.367036	0.233914
ENSG00000176903	PNMA1	paraneoplastic Ma antigen 1 [Source:HGNC Symbol;Acc:HGNC:9158]	1.34277	0.582869	1.20397		0.501384	0.582869	-0.217256
ENSG00000111641	NOP2	NOP2 nucleolar protein [Source:HGNC Symbol;Acc:HGNC:7867]	1.26392	0.548844	1.20343		0.650366	0.548844	0.244855
ENSG00000169991	IFFO2	intermediate filament family orphan 2 [Source:HGNC Symbol;Acc:HGNC:27006]	1.52112	0.660584	1.20332		0.545833	0.660584	-0.275283
ENSG00000132740	IGHMBP2	immunoglobulin mu binding protein 2 [Source:HGNC Symbol;Acc:HGNC:5542]	1.13664	0.494469	1.20082		0.522473	0.494469	0.0794769
ENSG00000003989	SLC7A2	solute carrier family 7 (cationic amino acid transporter, y+ system), member 2 [Source:HGNC Symbol;Acc:HGNC:11060]	1.7428	0.758707	1.19979		1.24303	0.758707	0.712252
ENSG00000187531	SIRT7	sirtuin 7 [Source:HGNC Symbol;Acc:HGNC:14935]	1.3693	0.596836	1.19803		0.778623	0.596836	0.383591
ENSG00000077458	FAM76B	family with sequence similarity 76, member B [Source:HGNC Symbol;Acc:HGNC:28492]	1.29035	0.562482	1.19788		0.999713	0.562482	0.829708
ENSG00000172458	IL17D	interleukin 17D [Source:HGNC Symbol;Acc:HGNC:5984]	1.147	0.500313	1.19696		0.522076	0.500313	0.0614297
ENSG00000115762	PLEKHB2	pleckstrin homology domain containing, family B (evectins) member 2 [Source:HGNC Symbol;Acc:HGNC:19236]	1.89727	0.828136	1.19599		0.958838	0.828136	0.211419
ENSG00000121058	COIL	coilin [Source:HGNC Symbol;Acc:HGNC:2184]	0.954168	0.416488	1.19597		0.464012	0.416488	0.155886
ENSG00000176595	KBTBD11	kelch repeat and BTB (POZ) domain containing 11 [Source:HGNC Symbol;Acc:HGNC:29104]	1.19714	0.522729	1.19545		0.635486	0.522729	0.281795
ENSG00000166446	CDYL2	chromodomain protein, Y-like 2 [Source:HGNC Symbol;Acc:HGNC:23030]	1.32369	0.57799	1.19544		0.619857	0.57799	0.100889
ENSG00000178974	FBXO34	F-box protein 34 [Source:HGNC Symbol;Acc:HGNC:20201]	2.15612	0.943225	1.19276		1.18602	0.943225	0.330449
ENSG00000133069	TMCC2	transmembrane and coiled-coil domain family 2 [Source:HGNC Symbol;Acc:HGNC:24239]	2.07238	0.906725	1.19255		0.814435	0.906725	-0.154865
ENSG00000111450	STX2	syntaxin 2 [Source:HGNC Symbol;Acc:HGNC:3403]	1.67156	0.731429	1.1924		0.831251	0.731429	0.184565
ENSG00000261221	ZNF865	zinc finger protein 865 [Source:HGNC Symbol;Acc:HGNC:38705]	1.31189	0.574091	1.19229		0.707353	0.574091	0.301151
ENSG00000157927	RADIL	Ras association and DIL domains [Source:HGNC Symbol;Acc:HGNC:22226]	0.901518	0.395586	1.18837		0.448048	0.395586	0.179664
ENSG00000168286	THAP11	THAP domain containing 11 [Source:HGNC Symbol;Acc:HGNC:23194]	0.946445	0.41568	1.18705		0.673776	0.41568	0.696797
ENSG00000122696	SLC25A51	solute carrier family 25, member 51 [Source:HGNC Symbol;Acc:HGNC:23323]	1.87146	0.822237	1.18654		0.841084	0.822237	0.0326964
ENSG00000110172	CHORDC1	cysteine and histidine-rich domain (CHORD) containing 1 [Source:HGNC Symbol;Acc:HGNC:14525]	1.83284	0.805888	1.18542		0.775831	0.805888	-0.0548385
ENSG00000104549	SQLE	squalene epoxidase [Source:HGNC Symbol;Acc:HGNC:11279]	3.14327	1.38306	1.1844		1.64199	1.38306	0.247576
ENSG00000234912	SNHG20	small nucleolar RNA host gene 20 [Source:HGNC Symbol;Acc:HGNC:33099]	1.3271	0.584361	1.18335		0.975319	0.584361	0.739015
ENSG00000066248	NGEF	neuronal guanine nucleotide exchange factor [Source:HGNC Symbol;Acc:HGNC:7807]	1.73438	0.764129	1.18253		1.01697	0.764129	0.412383
ENSG00000156735	BAG4	BCL2-associated athanogene 4 [Source:HGNC Symbol;Acc:HGNC:940]	1.12812	0.497212	1.18198		0.577628	0.497212	0.216279
ENSG00000099992	TBC1D10A	TBC1 domain family, member 10A [Source:HGNC Symbol;Acc:HGNC:23609]	1.36647	0.602759	1.1808		0.745302	0.602759	0.306244
ENSG00000137309	HMGA1	high mobility group AT-hook 1 [Source:HGNC Symbol;Acc:HGNC:5010]	2.38481	1.05421	1.17771		1.34994	1.05421	0.356729
ENSG00000177981	ASB8	ankyrin repeat and SOCS box containing 8 [Source:HGNC Symbol;Acc:HGNC:17183]	0.817353	0.361458	1.17713		0.44878	0.361458	0.31218
ENSG00000166848	TERF2IP	telomeric repeat binding factor 2, interacting protein [Source:HGNC Symbol;Acc:HGNC:19246]	1.43003	0.632592	1.1767		0.763892	0.632592	0.272092
ENSG00000223802	CERS1	ceramide synthase 1 [Source:HGNC Symbol;Acc:HGNC:14253]	1.78479	0.790046	1.17575		0.78732	0.790046	-0.0049869
ENSG00000125779	PANK2	pantothenate kinase 2 [Source:HGNC Symbol;Acc:HGNC:15894]	1.41687	0.627292	1.1755		0.650675	0.627292	0.0527987
ENSG00000164484	TMEM200A	transmembrane protein 200A [Source:HGNC Symbol;Acc:HGNC:21075]	1.7665	0.782125	1.17543		0.62186	0.782125	-0.33081
ENSG00000198855	FICD	FIC domain containing [Source:HGNC Symbol;Acc:HGNC:18416]	0.564828	0.250112	1.17524		0.319062	0.250112	0.351264
ENSG00000158445	KCNB1	potassium channel, voltage gated Shab related subfamily B, member 1 [Source:HGNC Symbol;Acc:HGNC:6231]	1.63558	0.724768	1.17421		0.834212	0.724768	0.202896
ENSG00000176058	TPRN	taperin [Source:HGNC Symbol;Acc:HGNC:26894]	1.21833	0.540172	1.17341		0.594921	0.540172	0.13928
ENSG00000166170	BAG5	BCL2-associated athanogene 5 [Source:HGNC Symbol;Acc:HGNC:941]	1.37817	0.611204	1.17302		0.733468	0.611204	0.263079
ENSG00000187650	VMAC	vimentin-type intermediate filament associated coiled-coil protein [Source:HGNC Symbol;Acc:HGNC:33803]	0.853951	0.378824	1.17262		0.52803	0.378824	0.47909
ENSG00000146072	TNFRSF21	tumor necrosis factor receptor superfamily, member 21 [Source:HGNC Symbol;Acc:HGNC:13469]	1.15196	0.511305	1.17184		0.567129	0.511305	0.149492
ENSG00000224470	ATXN1L	ataxin 1-like [Source:HGNC Symbol;Acc:HGNC:33279]	2.04278	0.908777	1.16854		1.15948	0.908777	0.351476
ENSG00000103168	TAF1C	TATA box binding protein (TBP)-associated factor, RNA polymerase I, C, 110kDa [Source:HGNC Symbol;Acc:HGNC:11534]	0.84934	0.377898	1.16834		0.499582	0.377898	0.402725
ENSG00000160539	PPAPDC3	phosphatidic acid phosphatase type 2 domain containing 3 [Source:HGNC Symbol;Acc:HGNC:28174]	1.14724	0.510518	1.16814		0.59097	0.510518	0.211123
ENSG00000065989	PDE4A	phosphodiesterase 4A, cAMP-specific [Source:HGNC Symbol;Acc:HGNC:8780]	1.67213	0.744527	1.16729		0.886203	0.744527	0.251312
ENSG00000075426	FOSL2	FOS-like antigen 2 [Source:HGNC Symbol;Acc:HGNC:3798]	34.3315	15.2887	1.16707		30.9447	15.2887	1.01722
ENSG00000103056	SMPD3	sphingomyelin phosphodiesterase 3, neutral membrane (neutral sphingomyelinase II) [Source:HGNC Symbol;Acc:HGNC:14240]	1.77414	0.790549	1.16619		0.723127	0.790549	-0.128605
ENSG00000143079	CTTNBP2NL	CTTNBP2 N-terminal like [Source:HGNC Symbol;Acc:HGNC:25330]	1.24923	0.557121	1.16498		0.707307	0.557121	0.344345
ENSG00000085788	DDHD2	DDHD domain containing 2 [Source:HGNC Symbol;Acc:HGNC:29106]	1.29299	0.576669	1.1649		0.556131	0.576669	-0.0523177
ENSG00000140280	LYSMD2	LysM, putative peptidoglycan-binding, domain containing 2 [Source:HGNC Symbol;Acc:HGNC:28571]	1.63362	0.729389	1.16331		0.602609	0.729389	-0.275466
ENSG00000133316	WDR74	WD repeat domain 74 [Source:HGNC Symbol;Acc:HGNC:25529]	2.04496	0.913425	1.16272		1.01925	0.913425	0.158145
ENSG00000124201	ZNFX1	zinc finger, NFX1-type containing 1 [Source:HGNC Symbol;Acc:HGNC:29271]	1.26398	0.565225	1.16108		0.703598	0.565225	0.315925
ENSG00000180035	ZNF48	zinc finger protein 48 [Source:HGNC Symbol;Acc:HGNC:13114]	0.973165	0.435278	1.16075		0.707809	0.435278	0.701422
ENSG00000175093	SPSB4	splA/ryanodine receptor domain and SOCS box containing 4 [Source:HGNC Symbol;Acc:HGNC:30630]	0.986943	0.441633	1.16012		0.763023	0.441633	0.788878
ENSG00000196368	NUDT11	nudix (nucleoside diphosphate linked moiety X)-type motif 11 [Source:HGNC Symbol;Acc:HGNC:18011]	2.32383	1.04075	1.15888		1.06595	1.04075	0.034521
ENSG00000170468	C14orf169	chromosome 14 open reading frame 169 [Source:HGNC Symbol;Acc:HGNC:20968]	0.65169	0.291975	1.15834		0.474024	0.291975	0.699115
ENSG00000167394	ZNF668	zinc finger protein 668 [Source:HGNC Symbol;Acc:HGNC:25821]	0.853111	0.38249	1.15731		0.462112	0.38249	0.272821
ENSG00000245532	NEAT1	nuclear paraspeckle assembly transcript 1 (non-protein coding) [Source:HGNC Symbol;Acc:HGNC:30815]	2.63414	1.18168	1.15649		3.64062	1.18168	1.62334
ENSG00000185163	DDX51	DEAD (Asp-Glu-Ala-Asp) box polypeptide 51 [Source:HGNC Symbol;Acc:HGNC:20082]	1.39689	0.627193	1.15524		0.865512	0.627193	0.464644
ENSG00000155760	FZD7	frizzled class receptor 7 [Source:HGNC Symbol;Acc:HGNC:4045]	1.48052	0.666428	1.15158		1.21571	0.666428	0.867279
ENSG00000187231	SESTD1	SEC14 and spectrin domains 1 [Source:HGNC Symbol;Acc:HGNC:18379]	1.41955	0.639366	1.15072		0.858263	0.639366	0.424778
ENSG00000174151	CYB561D1	cytochrome b561 family, member D1 [Source:HGNC Symbol;Acc:HGNC:26804]	1.09143	0.491735	1.15026		0.885118	0.491735	0.847988
ENSG00000106701	FSD1L	fibronectin type III and SPRY domain containing 1-like [Source:HGNC Symbol;Acc:HGNC:13753]	1.56404	0.706644	1.14622		0.634985	0.706644	-0.154262
ENSG00000234127	TRIM26	tripartite motif containing 26 [Source:HGNC Symbol;Acc:HGNC:12962]	1.49372	0.674993	1.14596		0.684275	0.674993	0.019704
ENSG00000150401	DCUN1D2	DCN1, defective in cullin neddylation 1, domain containing 2 [Source:HGNC Symbol;Acc:HGNC:20328]	1.32397	0.598306	1.14591		0.793794	0.598306	0.40788
ENSG00000123297	TSFM	Ts translation elongation factor, mitochondrial [Source:HGNC Symbol;Acc:HGNC:12367]	1.11616	0.504566	1.14542		0.480562	0.504566	-0.0703209
ENSG00000127863	TNFRSF19	tumor necrosis factor receptor superfamily, member 19 [Source:HGNC Symbol;Acc:HGNC:11915]	2.16195	0.978162	1.14419		0.931199	0.978162	-0.070984
ENSG00000168005	C11orf84	chromosome 11 open reading frame 84 [Source:HGNC Symbol;Acc:HGNC:25115]	1.63136	0.738759	1.1429		0.851645	0.738759	0.205148
ENSG00000069966	GNB5	guanine nucleotide binding protein (G protein), beta 5 [Source:HGNC Symbol;Acc:HGNC:4401]	1.99306	0.904626	1.13959		0.940682	0.904626	0.056386
ENSG00000117676	RPS6KA1	ribosomal protein S6 kinase, 90kDa, polypeptide 1 [Source:HGNC Symbol;Acc:HGNC:10430]	2.02058	0.917482	1.13902		0.637893	0.917482	-0.524365
ENSG00000177301	KCNA2	potassium channel, voltage gated shaker related subfamily A, member 2 [Source:HGNC Symbol;Acc:HGNC:6220]	1.07008	0.486039	1.13858		0.631348	0.486039	0.377362
ENSG00000175832	ETV4	ets variant 4 [Source:HGNC Symbol;Acc:HGNC:3493]	1.63637	0.744152	1.13683		1.02954	0.744152	0.468335
ENSG00000182307	C8orf33	chromosome 8 open reading frame 33 [Source:HGNC Symbol;Acc:HGNC:26104]	1.07	0.4872	1.13503		0.487575	0.4872	0.00111204
ENSG00000147912	FBXO10	F-box protein 10 [Source:HGNC Symbol;Acc:HGNC:13589]	0.816113	0.371996	1.13348		0.520089	0.371996	0.483471
ENSG00000116786	PLEKHM2	pleckstrin homology domain containing, family M (with RUN domain) member 2 [Source:HGNC Symbol;Acc:HGNC:29131]	1.34942	0.615733	1.13197		0.755406	0.615733	0.294948
ENSG00000213780	GTF2H4	general transcription factor IIH, polypeptide 4, 52kDa [Source:HGNC Symbol;Acc:HGNC:4658]	1.12501	0.513491	1.13153		0.428723	0.513491	-0.260295
ENSG00000137876	RSL24D1	ribosomal L24 domain containing 1 [Source:HGNC Symbol;Acc:HGNC:18479]	1.63451	0.746579	1.13049		0.743826	0.746579	-0.00532882
ENSG00000153786	ZDHHC7	zinc finger, DHHC-type containing 7 [Source:HGNC Symbol;Acc:HGNC:18459]	1.12725	0.51489	1.13048		0.79164	0.51489	0.620579
ENSG00000010270	STARD3NL	STARD3 N-terminal like [Source:HGNC Symbol;Acc:HGNC:19169]	1.89978	0.868158	1.1298		0.83958	0.868158	-0.0482903
ENSG00000151491	EPS8	epidermal growth factor receptor pathway substrate 8 [Source:HGNC Symbol;Acc:HGNC:3420]	1.70804	0.781593	1.12785		0.923719	0.781593	0.241037
ENSG00000115540	MOB4	MOB family member 4, phocein [Source:HGNC Symbol;Acc:HGNC:17261]	1.24548	0.569976	1.12773		0.646198	0.569976	0.181074
ENSG00000136240	KDELR2	KDEL (Lys-Asp-Glu-Leu) endoplasmic reticulum protein retention receptor 2 [Source:HGNC Symbol;Acc:HGNC:6305]	1.62704	0.745031	1.12688		0.857704	0.745031	0.203179
ENSG00000176845	METRNL	meteorin, glial cell differentiation regulator-like [Source:HGNC Symbol;Acc:HGNC:27584]	3.16613	1.44993	1.12673		1.17387	1.44993	-0.304717
ENSG00000183520	UTP11L	UTP11-like, U3 small nucleolar ribonucleoprotein (yeast) [Source:HGNC Symbol;Acc:HGNC:24329]	1.27248	0.583235	1.12549		0.625451	0.583235	0.100819
ENSG00000128228	SDF2L1	stromal cell-derived factor 2-like 1 [Source:HGNC Symbol;Acc:HGNC:10676]	2.06926	0.948886	1.12481		0.685776	0.948886	-0.468499
ENSG00000156502	SUPV3L1	suppressor of var1, 3-like 1 (S. cerevisiae) [Source:HGNC Symbol;Acc:HGNC:11471]	1.17872	0.540523	1.1248		0.504101	0.540523	-0.100645
ENSG00000038219	BOD1L1	biorientation of chromosomes in cell division 1-like 1 [Source:HGNC Symbol;Acc:HGNC:31792]	1.31033	0.600907	1.12472		0.858569	0.600907	0.514792
ENSG00000114268	PFKFB4	6-phosphofructo-2-kinase/fructose-2,6-biphosphatase 4 [Source:HGNC Symbol;Acc:HGNC:8875]	1.18939	0.545644	1.12419		0.496863	0.545644	-0.135112
ENSG00000125945	ZNF436	zinc finger protein 436 [Source:HGNC Symbol;Acc:HGNC:20814]	0.768715	0.352698	1.12401		0.532155	0.352698	0.593412
ENSG00000128564	VGF	VGF nerve growth factor inducible [Source:HGNC Symbol;Acc:HGNC:12684]	7.39095	3.39208	1.12359		16.9686	3.39208	2.32263
ENSG00000147955	SIGMAR1	sigma non-opioid intracellular receptor 1 [Source:HGNC Symbol;Acc:HGNC:8157]	0.764523	0.351314	1.1218		0.402644	0.351314	0.196744
ENSG00000183186	C2CD4C	C2 calcium-dependent domain containing 4C [Source:HGNC Symbol;Acc:HGNC:29417]	1.07604	0.4945	1.12169		0.377622	0.4945	-0.389026
ENSG00000185049	NELFA	negative elongation factor complex member A [Source:HGNC Symbol;Acc:HGNC:12768]	1.22806	0.565137	1.11971		0.959158	0.565137	0.763167
ENSG00000163156	SCNM1	sodium channel modifier 1 [Source:HGNC Symbol;Acc:HGNC:23136]	1.63612	0.753859	1.11791		0.622915	0.753859	-0.275258
ENSG00000148459	PDSS1	prenyl (decaprenyl) diphosphate synthase, subunit 1 [Source:HGNC Symbol;Acc:HGNC:17759]	0.968264	0.44616	1.11784		0.63741	0.44616	0.514662
ENSG00000133641	C12orf29	chromosome 12 open reading frame 29 [Source:HGNC Symbol;Acc:HGNC:25322]	1.13052	0.520961	1.11774		0.416242	0.520961	-0.323751
ENSG00000186479	RGS7BP	regulator of G-protein signaling 7 binding protein [Source:HGNC Symbol;Acc:HGNC:23271]	3.63347	1.67547	1.11678		2.49955	1.67547	0.577104
ENSG00000168876	ANKRD49	ankyrin repeat domain 49 [Source:HGNC Symbol;Acc:HGNC:25970]	0.637135	0.294102	1.11528		0.346632	0.294102	0.237091
ENSG00000128965	CHAC1	ChaC glutathione-specific gamma-glutamylcyclotransferase 1 [Source:HGNC Symbol;Acc:HGNC:28680]	5.84968	2.70106	1.11483		5.38177	2.70106	0.994554
ENSG00000198355	PIM3	Pim-3 proto-oncogene, serine/threonine kinase [Source:HGNC Symbol;Acc:HGNC:19310]	4.39713	2.03073	1.11456		2.15675	2.03073	0.0868586
ENSG00000183248	PRR36	proline rich 36 [Source:HGNC Symbol;Acc:HGNC:26172]	0.930987	0.43005	1.11426		0.677744	0.43005	0.656237
ENSG00000164323	CFAP97	cilia and flagella associated protein 97 [Source:HGNC Symbol;Acc:HGNC:29276]	0.77332	0.357645	1.11254		0.334053	0.357645	-0.098451
ENSG00000130147	SH3BP4	SH3-domain binding protein 4 [Source:HGNC Symbol;Acc:HGNC:10826]	1.51972	0.703344	1.1115		0.84456	0.703344	0.263969
ENSG00000180921	FAM83H	family with sequence similarity 83, member H [Source:HGNC Symbol;Acc:HGNC:24797]	0.843444	0.390388	1.11138		0.321592	0.390388	-0.279678
ENSG00000102890	ELMO3	engulfment and cell motility 3 [Source:HGNC Symbol;Acc:HGNC:17289]	1.02865	0.476258	1.11093		0.560836	0.476258	0.235835
ENSG00000166016	ABTB2	ankyrin repeat and BTB (POZ) domain containing 2 [Source:HGNC Symbol;Acc:HGNC:23842]	2.78317	1.28992	1.10944		1.30047	1.28992	0.0117452
ENSG00000114383	TUSC2	tumor suppressor candidate 2 [Source:HGNC Symbol;Acc:HGNC:17034]	1.1008	0.510326	1.10906		0.467093	0.510326	-0.127709
ENSG00000067191	CACNB1	calcium channel, voltage-dependent, beta 1 subunit [Source:HGNC Symbol;Acc:HGNC:1401]	2.13384	0.989424	1.10879		0.722589	0.989424	-0.453414
ENSG00000168918	INPP5D	inositol polyphosphate-5-phosphatase, 145kDa [Source:HGNC Symbol;Acc:HGNC:6079]	0.957944	0.444356	1.10822		0.524673	0.444356	0.239702
ENSG00000100744	GSKIP	GSK3B interacting protein [Source:HGNC Symbol;Acc:HGNC:20343]	1.80941	0.839968	1.10712		0.735355	0.839968	-0.191893
ENSG00000184277	TM2D3	TM2 domain containing 3 [Source:HGNC Symbol;Acc:HGNC:24128]	1.16296	0.540077	1.10656		0.618092	0.540077	0.194659
ENSG00000145911	N4BP3	NEDD4 binding protein 3 [Source:HGNC Symbol;Acc:HGNC:29852]	2.06989	0.96152	1.10617		0.576363	0.96152	-0.738341
ENSG00000204519	ZNF551	zinc finger protein 551 [Source:HGNC Symbol;Acc:HGNC:25108]	0.800613	0.372585	1.10353		0.617289	0.372585	0.728374
ENSG00000094841	UPRT	uracil phosphoribosyltransferase (FUR1) homolog (S. cerevisiae) [Source:HGNC Symbol;Acc:HGNC:28334]	1.18426	0.551403	1.10281		0.625699	0.551403	0.18236
ENSG00000128191	DGCR8	DGCR8 microprocessor complex subunit [Source:HGNC Symbol;Acc:HGNC:2847]	1.13389	0.527967	1.10276		0.666772	0.527967	0.336747
ENSG00000156853	ZNF689	zinc finger protein 689 [Source:HGNC Symbol;Acc:HGNC:25173]	0.510323	0.237627	1.10271		0.237537	0.237627	-0.000546804
ENSG00000179564	LSMEM2	leucine-rich single-pass membrane protein 2 [Source:HGNC Symbol;Acc:HGNC:26781]	1.05085	0.489412	1.10244		0.682897	0.489412	0.480619
ENSG00000136273	HUS1	HUS1 checkpoint clamp component [Source:HGNC Symbol;Acc:HGNC:5309]	1.33034	0.620222	1.10093		0.782997	0.620222	0.33622
ENSG00000166106	ADAMTS15	ADAM metallopeptidase with thrombospondin type 1 motif, 15 [Source:HGNC Symbol;Acc:HGNC:16305]	0.903559	0.421368	1.10054		0.730911	0.421368	0.794617
ENSG00000152223	EPG5	ectopic P-granules autophagy protein 5 homolog (C. elegans) [Source:HGNC Symbol;Acc:HGNC:29331]	0.903609	0.421737	1.09935		0.481276	0.421737	0.190522
ENSG00000139112	GABARAPL1	GABA(A) receptor-associated protein like 1 [Source:HGNC Symbol;Acc:HGNC:4068]	3.19116	1.4896	1.09915		1.8504	1.4896	0.31291
ENSG00000163932	PRKCD	protein kinase C, delta [Source:HGNC Symbol;Acc:HGNC:9399]	2.00525	0.936165	1.09895		1.05465	0.936165	0.171927
ENSG00000132603	NIP7	NIP7, nucleolar pre-rRNA processing protein [Source:HGNC Symbol;Acc:HGNC:24328]	1.19265	0.556804	1.09893		0.747358	0.556804	0.42463
ENSG00000165219	GAPVD1	GTPase activating protein and VPS9 domains 1 [Source:HGNC Symbol;Acc:HGNC:23375]	1.43887	0.672097	1.0982		0.753144	0.672097	0.164257
ENSG00000147324	MFHAS1	malignant fibrous histiocytoma amplified sequence 1 [Source:HGNC Symbol;Acc:HGNC:16982]	2.30495	1.07768	1.09681		1.32095	1.07768	0.293653
ENSG00000145860	RNF145	ring finger protein 145 [Source:HGNC Symbol;Acc:HGNC:20853]	1.28619	0.602096	1.09504		0.600596	0.602096	-0.00359868
ENSG00000175229	GAL3ST3	galactose-3-O-sulfotransferase 3 [Source:HGNC Symbol;Acc:HGNC:24144]	1.11911	0.524308	1.09387		0.47859	0.524308	-0.131625
ENSG00000085978	ATG16L1	autophagy related 16-like 1 [Source:HGNC Symbol;Acc:HGNC:21498]	1.60976	0.754404	1.09344		0.939181	0.754404	0.316067
ENSG00000136997	MYC	v-myc avian myelocytomatosis viral oncogene homolog [Source:HGNC Symbol;Acc:HGNC:7553]	1.44671	0.67825	1.09289		0.449376	0.67825	-0.593895
ENSG00000164221	CCDC112	coiled-coil domain containing 112 [Source:HGNC Symbol;Acc:HGNC:28599]	1.04944	0.492053	1.09274		0.427089	0.492053	-0.204279
ENSG00000058063	ATP11B	ATPase, class VI, type 11B [Source:HGNC Symbol;Acc:HGNC:13553]	2.1939	1.02869	1.0927		1.21273	1.02869	0.237461
ENSG00000115761	NOL10	nucleolar protein 10 [Source:HGNC Symbol;Acc:HGNC:25862]	1.25475	0.58881	1.09153		0.574099	0.58881	-0.0365019
ENSG00000180875	GREM2	gremlin 2, DAN family BMP antagonist [Source:HGNC Symbol;Acc:HGNC:17655]	2.49832	1.17241	1.09148		1.34536	1.17241	0.19851
ENSG00000267909	CCDC177	coiled-coil domain containing 177 [Source:HGNC Symbol;Acc:HGNC:23243]	0.489269	0.22967	1.09107		0.273154	0.22967	0.250155
ENSG00000127080	IPPK	inositol 1,3,4,5,6-pentakisphosphate 2-kinase [Source:HGNC Symbol;Acc:HGNC:14645]	1.0064	0.472636	1.09041		0.825143	0.472636	0.803915
ENSG00000125449	ARMC7	armadillo repeat containing 7 [Source:HGNC Symbol;Acc:HGNC:26168]	1.05164	0.494396	1.08891		0.637348	0.494396	0.366415
ENSG00000136848	DAB2IP	DAB2 interacting protein [Source:HGNC Symbol;Acc:HGNC:17294]	1.46564	0.689328	1.08827		0.600648	0.689328	-0.198671
ENSG00000119574	ZBTB45	zinc finger and BTB domain containing 45 [Source:HGNC Symbol;Acc:HGNC:23715]	0.668669	0.314767	1.08701		0.40249	0.314767	0.354668
ENSG00000196867	ZFP28	ZFP28 zinc finger protein [Source:HGNC Symbol;Acc:HGNC:17801]	0.943505	0.444387	1.08621		0.507895	0.444387	0.192715
ENSG00000111911	HINT3	histidine triad nucleotide binding protein 3 [Source:HGNC Symbol;Acc:HGNC:18468]	1.50852	0.711116	1.08497		0.628236	0.711116	-0.178779
ENSG00000115525	ST3GAL5	ST3 beta-galactoside alpha-2,3-sialyltransferase 5 [Source:HGNC Symbol;Acc:HGNC:10872]	1.94909	0.919367	1.08409		0.694725	0.919367	-0.404198
ENSG00000160256	FAM207A	family with sequence similarity 207, member A [Source:HGNC Symbol;Acc:HGNC:15811]	1.03191	0.487092	1.08305		0.575763	0.487092	0.241279
ENSG00000122912	SLC25A16	solute carrier family 25 (mitochondrial carrier), member 16 [Source:HGNC Symbol;Acc:HGNC:10986]	0.988592	0.466913	1.08222		0.451776	0.466913	-0.0475466
ENSG00000166454	ATMIN	ATM interactor [Source:HGNC Symbol;Acc:HGNC:29034]	1.30933	0.61857	1.08182		0.724668	0.61857	0.228384
ENSG00000150893	FREM2	FRAS1 related extracellular matrix protein 2 [Source:HGNC Symbol;Acc:HGNC:25396]	1.26208	0.596391	1.08148		0.923206	0.596391	0.630393
ENSG00000116062	MSH6	mutS homolog 6 [Source:HGNC Symbol;Acc:HGNC:7329]	1.39806	0.660662	1.08144		1.00637	0.660662	0.607182
ENSG00000146909	NOM1	nucleolar protein with MIF4G domain 1 [Source:HGNC Symbol;Acc:HGNC:13244]	1.15917	0.548364	1.07988		0.807609	0.548364	0.558522
ENSG00000125834	STK35	serine/threonine kinase 35 [Source:HGNC Symbol;Acc:HGNC:16254]	1.96182	0.928496	1.07922		1.04622	0.928496	0.172217
ENSG00000155034	FBXL18	F-box and leucine-rich repeat protein 18 [Source:HGNC Symbol;Acc:HGNC:21874]	1.30661	0.618736	1.07844		0.674834	0.618736	0.125209
ENSG00000099814	CEP170B	centrosomal protein 170B [Source:HGNC Symbol;Acc:HGNC:20362]	1.91245	0.905979	1.07787		0.940884	0.905979	0.0545392
ENSG00000129159	KCNC1	potassium channel, voltage gated Shaw related subfamily C, member 1 [Source:HGNC Symbol;Acc:HGNC:6233]	1.61867	0.768001	1.07563		1.03744	0.768001	0.433849
ENSG00000101134	DOK5	docking protein 5 [Source:HGNC Symbol;Acc:HGNC:16173]	1.76994	0.840442	1.07448		0.596569	0.840442	-0.494459
ENSG00000171161	ZNF672	zinc finger protein 672 [Source:HGNC Symbol;Acc:HGNC:26179]	1.02017	0.484894	1.07307		0.707391	0.484894	0.544839
ENSG00000172375	C2CD2L	C2CD2-like [Source:HGNC Symbol;Acc:HGNC:29000]	1.87714	0.892462	1.07268		1.01817	0.892462	0.190112
ENSG00000137252	HCRTR2	hypocretin (orexin) receptor 2 [Source:HGNC Symbol;Acc:HGNC:4849]	2.07771	0.987856	1.07262		0.955319	0.987856	-0.0483179
ENSG00000168795	ZBTB5	zinc finger and BTB domain containing 5 [Source:HGNC Symbol;Acc:HGNC:23836]	1.23544	0.58753	1.0723		0.717108	0.58753	0.287528
ENSG00000112852	PCDHB2	protocadherin beta 2 [Source:HGNC Symbol;Acc:HGNC:8687]	1.39425	0.663081	1.07223		1.03726	0.663081	0.645526
ENSG00000118655	DCLRE1B	DNA cross-link repair 1B [Source:HGNC Symbol;Acc:HGNC:17641]	0.662552	0.315216	1.07169		0.484585	0.315216	0.62041
ENSG00000196419	XRCC6	X-ray repair complementing defective repair in Chinese hamster cells 6 [Source:HGNC Symbol;Acc:HGNC:4055]	1.37183	0.65269	1.07163		0.745519	0.65269	0.191848
ENSG00000135108	FBXO21	F-box protein 21 [Source:HGNC Symbol;Acc:HGNC:13592]	1.06517	0.506925	1.07124		0.600606	0.506925	0.244648
ENSG00000167536	DHRS13	dehydrogenase/reductase (SDR family) member 13 [Source:HGNC Symbol;Acc:HGNC:28326]	1.09429	0.520826	1.07113		0.337197	0.520826	-0.627209
ENSG00000165389	SPTSSA	serine palmitoyltransferase, small subunit A [Source:HGNC Symbol;Acc:HGNC:20361]	2.38273	1.13531	1.06953		0.944217	1.13531	-0.265891
ENSG00000116691	MIIP	migration and invasion inhibitory protein [Source:HGNC Symbol;Acc:HGNC:25715]	1.11303	0.530372	1.06942		0.577783	0.530372	0.123523
ENSG00000128791	TWSG1	twisted gastrulation BMP signaling modulator 1 [Source:HGNC Symbol;Acc:HGNC:12429]	1.74651	0.832321	1.06926		1.01879	0.832321	0.291647
ENSG00000108861	DUSP3	dual specificity phosphatase 3 [Source:HGNC Symbol;Acc:HGNC:3069]	2.21007	1.05381	1.06847		1.81863	1.05381	0.787233
ENSG00000205927	OLIG2	oligodendrocyte lineage transcription factor 2 [Source:HGNC Symbol;Acc:HGNC:9398]	1.28174	0.611329	1.06808		1.15107	0.611329	0.912949
ENSG00000135241	PNPLA8	patatin-like phospholipase domain containing 8 [Source:HGNC Symbol;Acc:HGNC:28900]	2.57122	1.22677	1.06759		1.12007	1.22677	-0.131275
ENSG00000135299	ANKRD6	ankyrin repeat domain 6 [Source:HGNC Symbol;Acc:HGNC:17280]	1.35729	0.647591	1.06758		0.625224	0.647591	-0.0507093
ENSG00000141560	FN3KRP	fructosamine 3 kinase related protein [Source:HGNC Symbol;Acc:HGNC:25700]	1.04153	0.497126	1.06703		0.522931	0.497126	0.0730095
ENSG00000105711	SCN1B	sodium channel, voltage gated, type I beta subunit [Source:HGNC Symbol;Acc:HGNC:10586]	2.84032	1.35694	1.06569		1.52959	1.35694	0.172783
ENSG00000160294	MCM3AP	minichromosome maintenance complex component 3 associated protein [Source:HGNC Symbol;Acc:HGNC:6946]	0.995506	0.47571	1.06535		0.493036	0.47571	0.0516094
ENSG00000130584	ZBTB46	zinc finger and BTB domain containing 46 [Source:HGNC Symbol;Acc:HGNC:16094]	0.99989	0.477866	1.06516		0.536271	0.477866	0.166356
ENSG00000179271	GADD45GIP1	growth arrest and DNA-damage-inducible, gamma interacting protein 1 [Source:HGNC Symbol;Acc:HGNC:29996]	1.27026	0.607182	1.06492		0.707478	0.607182	0.220557
ENSG00000110435	PDHX	pyruvate dehydrogenase complex, component X [Source:HGNC Symbol;Acc:HGNC:21350]	1.5877	0.759069	1.06463		0.834102	0.759069	0.135991
ENSG00000105186	ANKRD27	ankyrin repeat domain 27 (VPS9 domain) [Source:HGNC Symbol;Acc:HGNC:25310]	1.32674	0.634372	1.06448		0.539834	0.634372	-0.232812
ENSG00000089916	GPATCH2L	G patch domain containing 2-like [Source:HGNC Symbol;Acc:HGNC:20210]	1.22462	0.585691	1.06413		0.6314	0.585691	0.108414
ENSG00000128268	MGAT3	mannosyl (beta-1,4-)-glycoprotein beta-1,4-N-acetylglucosaminyltransferase [Source:HGNC Symbol;Acc:HGNC:7046]	1.17335	0.561408	1.06351		0.559638	0.561408	-0.0045573
ENSG00000181817	LSM10	LSM10, U7 small nuclear RNA associated [Source:HGNC Symbol;Acc:HGNC:17562]	1.07626	0.515713	1.06139		0.424735	0.515713	-0.280005
ENSG00000165512	ZNF22	zinc finger protein 22 [Source:HGNC Symbol;Acc:HGNC:13012]	1.05045	0.503584	1.0607		0.694425	0.503584	0.463587
ENSG00000138185	ENTPD1	ectonucleoside triphosphate diphosphohydrolase 1 [Source:HGNC Symbol;Acc:HGNC:3363]	0.908621	0.435614	1.06063		0.626181	0.435614	0.523528
ENSG00000164758	MED30	mediator complex subunit 30 [Source:HGNC Symbol;Acc:HGNC:23032]	2.01264	0.964971	1.06053		0.763902	0.964971	-0.337097
ENSG00000210194	MT-TE	mitochondrially encoded tRNA glutamic acid [Source:HGNC Symbol;Acc:HGNC:7479]	1.08748	0.522007	1.05885		0.741895	0.522007	0.507144
ENSG00000198146	ZNF770	zinc finger protein 770 [Source:HGNC Symbol;Acc:HGNC:26061]	0.731583	0.351314	1.05826		0.618603	0.351314	0.816255
ENSG00000076321	KLHL20	kelch-like family member 20 [Source:HGNC Symbol;Acc:HGNC:25056]	0.916673	0.440317	1.05787		0.618027	0.440317	0.48913
ENSG00000198369	SPRED2	sprouty-related, EVH1 domain containing 2 [Source:HGNC Symbol;Acc:HGNC:17722]	2.21094	1.06315	1.05632		1.6226	1.06315	0.609965
ENSG00000149639	SOGA1	suppressor of glucose, autophagy associated 1 [Source:HGNC Symbol;Acc:HGNC:16111]	1.10441	0.53113	1.05614		0.841379	0.53113	0.663693
ENSG00000185112	FAM43A	family with sequence similarity 43, member A [Source:HGNC Symbol;Acc:HGNC:26888]	1.24919	0.601521	1.05431		0.74396	0.601521	0.306609
ENSG00000140564	FURIN	furin (paired basic amino acid cleaving enzyme) [Source:HGNC Symbol;Acc:HGNC:8568]	1.92356	0.927059	1.05305		0.961205	0.927059	0.052183
ENSG00000173638	SLC19A1	solute carrier family 19 (folate transporter), member 1 [Source:HGNC Symbol;Acc:HGNC:10937]	1.3132	0.633367	1.05198		0.595383	0.633367	-0.0892226
ENSG00000196422	PPP1R26	protein phosphatase 1, regulatory subunit 26 [Source:HGNC Symbol;Acc:HGNC:29089]	0.989016	0.477059	1.05183		0.393402	0.477059	-0.278163
ENSG00000023330	ALAS1	5'-aminolevulinate synthase 1 [Source:HGNC Symbol;Acc:HGNC:396]	1.17857	0.568811	1.05101		0.531701	0.568811	-0.097335
ENSG00000003987	MTMR7	myotubularin related protein 7 [Source:HGNC Symbol;Acc:HGNC:7454]	1.09183	0.527223	1.05026		0.477154	0.527223	-0.143958
ENSG00000167964	RAB26	RAB26, member RAS oncogene family [Source:HGNC Symbol;Acc:HGNC:14259]	1.72717	0.834121	1.05008		1.08884	0.834121	0.38447
ENSG00000177150	FAM210A	family with sequence similarity 210, member A [Source:HGNC Symbol;Acc:HGNC:28346]	1.17178	0.565992	1.04985		0.669698	0.565992	0.242729
ENSG00000138623	SEMA7A	semaphorin 7A, GPI membrane anchor (John Milton Hagen blood group) [Source:HGNC Symbol;Acc:HGNC:10741]	1.5834	0.765008	1.04948		0.426681	0.765008	-0.842319
ENSG00000120688	WBP4	WW domain binding protein 4 [Source:HGNC Symbol;Acc:HGNC:12739]	1.53492	0.741759	1.04914		0.740067	0.741759	-0.00329462
ENSG00000011260	UTP18	UTP18 small subunit (SSU) processome component homolog (yeast) [Source:HGNC Symbol;Acc:HGNC:24274]	1.5909	0.769188	1.04844		0.892482	0.769188	0.214487
ENSG00000102057	KCND1	potassium channel, voltage gated Shal related subfamily D, member 1 [Source:HGNC Symbol;Acc:HGNC:6237]	1.14475	0.553571	1.0482		0.954677	0.553571	0.786246
ENSG00000267796	LIN37	lin-37 DREAM MuvB core complex component [Source:HGNC Symbol;Acc:HGNC:33234]	0.919716	0.445647	1.04529		0.646889	0.445647	0.537615
ENSG00000101463	SYNDIG1	synapse differentiation inducing 1 [Source:HGNC Symbol;Acc:HGNC:15885]	1.29421	0.627356	1.04472		0.437419	0.627356	-0.520269
ENSG00000196437	ZNF569	zinc finger protein 569 [Source:HGNC Symbol;Acc:HGNC:24737]	0.960178	0.465565	1.04432		0.497311	0.465565	0.095166
ENSG00000164045	CDC25A	cell division cycle 25A [Source:HGNC Symbol;Acc:HGNC:1725]	1.33031	0.64535	1.04361		0.723134	0.64535	0.164181
ENSG00000090565	RAB11FIP3	RAB11 family interacting protein 3 (class II) [Source:HGNC Symbol;Acc:HGNC:17224]	1.53665	0.746199	1.04215		0.974775	0.746199	0.385508
ENSG00000141568	FOXK2	forkhead box K2 [Source:HGNC Symbol;Acc:HGNC:6036]	1.8636	0.904991	1.04212		1.19348	0.904991	0.3992
ENSG00000089195	TRMT6	tRNA methyltransferase 6 [Source:HGNC Symbol;Acc:HGNC:20900]	0.969275	0.470838	1.04168		0.537016	0.470838	0.189735
ENSG00000177548	RABEP2	rabaptin, RAB GTPase binding effector protein 2 [Source:HGNC Symbol;Acc:HGNC:24817]	0.790918	0.384435	1.04079		0.501225	0.384435	0.382716
ENSG00000176022	B3GALT6	UDP-Gal:betaGal beta 1,3-galactosyltransferase polypeptide 6 [Source:HGNC Symbol;Acc:HGNC:17978]	0.874702	0.426013	1.03789		0.321278	0.426013	-0.407074
ENSG00000070047	PHRF1	PHD and ring finger domains 1 [Source:HGNC Symbol;Acc:HGNC:24351]	1.09722	0.534472	1.03766		0.69042	0.534472	0.36936
ENSG00000170385	SLC30A1	solute carrier family 30 (zinc transporter), member 1 [Source:HGNC Symbol;Acc:HGNC:11012]	1.61857	0.788647	1.03727		0.830055	0.788647	0.0738283
ENSG00000116574	RHOU	ras homolog family member U [Source:HGNC Symbol;Acc:HGNC:17794]	0.881436	0.42948	1.03726		0.27049	0.42948	-0.667016
ENSG00000127334	DYRK2	dual-specificity tyrosine-(Y)-phosphorylation regulated kinase 2 [Source:HGNC Symbol;Acc:HGNC:3093]	1.45279	0.708024	1.03696		0.869779	0.708024	0.29685
ENSG00000111728	ST8SIA1	ST8 alpha-N-acetyl-neuraminide alpha-2,8-sialyltransferase 1 [Source:HGNC Symbol;Acc:HGNC:10869]	1.09723	0.534743	1.03695		0.586188	0.534743	0.132518
ENSG00000102543	CDADC1	cytidine and dCMP deaminase domain containing 1 [Source:HGNC Symbol;Acc:HGNC:20299]	1.53267	0.747069	1.03674		0.827997	0.747069	0.148384
ENSG00000112679	DUSP22	dual specificity phosphatase 22 [Source:HGNC Symbol;Acc:HGNC:16077]	1.1092	0.540673	1.03669		0.492722	0.540673	-0.133984
ENSG00000142751	GPN2	GPN-loop GTPase 2 [Source:HGNC Symbol;Acc:HGNC:25513]	1.34097	0.653774	1.03641		0.631345	0.653774	-0.0503629
ENSG00000234965	SHISA8	shisa family member 8 [Source:HGNC Symbol;Acc:HGNC:18351]	1.21348	0.592071	1.03531		1.0536	0.592071	0.831489
ENSG00000127870	RNF6	ring finger protein (C3H2C3 type) 6 [Source:HGNC Symbol;Acc:HGNC:10069]	1.51506	0.739275	1.03519		0.921316	0.739275	0.317585
ENSG00000102786	INTS6	integrator complex subunit 6 [Source:HGNC Symbol;Acc:HGNC:14879]	1.60526	0.783467	1.03486		1.17368	0.783467	0.583089
ENSG00000160551	TAOK1	TAO kinase 1 [Source:HGNC Symbol;Acc:HGNC:29259]	1.5855	0.773874	1.03477		0.950096	0.773874	0.295975
ENSG00000196504	PRPF40A	PRP40 pre-mRNA processing factor 40 homolog A [Source:HGNC Symbol;Acc:HGNC:16463]	1.42661	0.696524	1.03434		0.820638	0.696524	0.236574
ENSG00000101191	DIDO1	death inducer-obliterator 1 [Source:HGNC Symbol;Acc:HGNC:2680]	1.74102	0.850376	1.03376		1.1072	0.850376	0.380742
ENSG00000114125	RNF7	ring finger protein 7 [Source:HGNC Symbol;Acc:HGNC:10070]	1.9354	0.945413	1.03362		0.870763	0.945413	-0.118663
ENSG00000066923	STAG3	stromal antigen 3 [Source:HGNC Symbol;Acc:HGNC:11356]	1.33246	0.651015	1.03333		0.807171	0.651015	0.310184
ENSG00000121057	AKAP1	A kinase (PRKA) anchor protein 1 [Source:HGNC Symbol;Acc:HGNC:367]	0.970284	0.474391	1.03233		0.480318	0.474391	0.0179115
ENSG00000091009	RBM27	RNA binding motif protein 27 [Source:HGNC Symbol;Acc:HGNC:29243]	1.05731	0.5173	1.03133		0.690351	0.5173	0.416331
ENSG00000133104	SPG20	spastic paraplegia 20 (Troyer syndrome) [Source:HGNC Symbol;Acc:HGNC:18514]	1.4173	0.6938	1.03055		0.711415	0.6938	0.0361711
ENSG00000159248	GJD2	gap junction protein, delta 2, 36kDa [Source:HGNC Symbol;Acc:HGNC:19154]	1.31421	0.643742	1.02965		0.730536	0.643742	0.182472
ENSG00000157796	WDR19	WD repeat domain 19 [Source:HGNC Symbol;Acc:HGNC:18340]	1.01974	0.499856	1.02861		0.505981	0.499856	0.0175713
ENSG00000009830	POMT2	protein-O-mannosyltransferase 2 [Source:HGNC Symbol;Acc:HGNC:19743]	1.05161	0.515711	1.02796		0.686929	0.515711	0.413598
ENSG00000175606	TMEM70	transmembrane protein 70 [Source:HGNC Symbol;Acc:HGNC:26050]	1.52504	0.748774	1.02624		0.589813	0.748774	-0.344273
ENSG00000105248	CCDC94	coiled-coil domain containing 94 [Source:HGNC Symbol;Acc:HGNC:25518]	1.09061	0.535636	1.0258		0.78377	0.535636	0.549176
ENSG00000176490	DIRAS1	DIRAS family, GTP-binding RAS-like 1 [Source:HGNC Symbol;Acc:HGNC:19127]	1.06372	0.523128	1.02388		0.39716	0.523128	-0.397441
ENSG00000136950	ARPC5L	actin related protein 2/3 complex, subunit 5-like [Source:HGNC Symbol;Acc:HGNC:23366]	1.79464	0.882934	1.02332		0.801135	0.882934	-0.140261
ENSG00000178896	EXOSC4	exosome component 4 [Source:HGNC Symbol;Acc:HGNC:18189]	0.888591	0.43784	1.02112		0.492387	0.43784	0.16939
ENSG00000143179	UCK2	uridine-cytidine kinase 2 [Source:HGNC Symbol;Acc:HGNC:12562]	1.00725	0.496683	1.02003		0.506272	0.496683	0.0275858
ENSG00000143479	DYRK3	dual-specificity tyrosine-(Y)-phosphorylation regulated kinase 3 [Source:HGNC Symbol;Acc:HGNC:3094]	1.39049	0.685678	1.01999		0.575963	0.685678	-0.251555
ENSG00000178184	PARD6G	par-6 family cell polarity regulator gamma [Source:HGNC Symbol;Acc:HGNC:16076]	1.17846	0.581627	1.01874		0.703203	0.581627	0.273846
ENSG00000169255	B3GALNT1	beta-1,3-N-acetylgalactosaminyltransferase 1 (globoside blood group) [Source:HGNC Symbol;Acc:HGNC:918]	0.928052	0.458352	1.01775		0.458084	0.458352	-0.000845249
ENSG00000272333	KMT2B	lysine (K)-specific methyltransferase 2B [Source:HGNC Symbol;Acc:HGNC:15840]	1.36499	0.674378	1.01726		0.948177	0.674378	0.491598
ENSG00000092445	TYRO3	TYRO3 protein tyrosine kinase [Source:HGNC Symbol;Acc:HGNC:12446]	2.26062	1.11784	1.01601		1.28939	1.11784	0.205975
ENSG00000174672	BRSK2	BR serine/threonine kinase 2 [Source:HGNC Symbol;Acc:HGNC:11405]	1.34756	0.666997	1.0146		0.774499	0.666997	0.215582
ENSG00000197380	DACT3	dishevelled-binding antagonist of beta-catenin 3 [Source:HGNC Symbol;Acc:HGNC:30745]	2.35617	1.16654	1.01421		1.52174	1.16654	0.383494
ENSG00000048392	RRM2B	ribonucleotide reductase M2 B (TP53 inducible) [Source:HGNC Symbol;Acc:HGNC:17296]	1.33294	0.65999	1.01409		0.572939	0.65999	-0.204062
ENSG00000169895	SYAP1	synapse associated protein 1 [Source:HGNC Symbol;Acc:HGNC:16273]	2.39295	1.18546	1.01335		1.03726	1.18546	-0.192665
ENSG00000169116	PARM1	prostate androgen-regulated mucin-like protein 1 [Source:HGNC Symbol;Acc:HGNC:24536]	1.75406	0.869206	1.01293		0.896878	0.869206	0.0452143
ENSG00000168172	HOOK3	hook microtubule-tethering protein 3 [Source:HGNC Symbol;Acc:HGNC:23576]	1.35296	0.670514	1.01277		0.801095	0.670514	0.256706
ENSG00000140044	JDP2	Jun dimerization protein 2 [Source:HGNC Symbol;Acc:HGNC:17546]	1.84632	0.915486	1.01205		2.02041	0.915486	1.14204
ENSG00000134265	NAPG	N-ethylmaleimide-sensitive factor attachment protein, gamma [Source:HGNC Symbol;Acc:HGNC:7642]	1.72172	0.85374	1.01198		0.783302	0.85374	-0.124228
ENSG00000164916	FOXK1	forkhead box K1 [Source:HGNC Symbol;Acc:HGNC:23480]	0.952312	0.473814	1.00711		0.672668	0.473814	0.505574
ENSG00000105229	PIAS4	protein inhibitor of activated STAT, 4 [Source:HGNC Symbol;Acc:HGNC:17002]	1.15861	0.576695	1.00652		0.827395	0.576695	0.520769
ENSG00000255690	TRIL	TLR4 interactor with leucine-rich repeats [Source:HGNC Symbol;Acc:HGNC:22200]	0.561965	0.279783	1.00617		0.461731	0.279783	0.722743
ENSG00000115364	MRPL19	mitochondrial ribosomal protein L19 [Source:HGNC Symbol;Acc:HGNC:14052]	1.24235	0.619004	1.00505		0.500199	0.619004	-0.307448
ENSG00000128891	C15orf57	chromosome 15 open reading frame 57 [Source:HGNC Symbol;Acc:HGNC:28295]	1.54467	0.7698	1.00475		0.659655	0.7698	-0.22277
ENSG00000183579	ZNRF3	zinc and ring finger 3 [Source:HGNC Symbol;Acc:HGNC:18126]	1.38283	0.689297	1.00442		1.04995	0.689297	0.607122
ENSG00000182544	MFSD5	major facilitator superfamily domain containing 5 [Source:HGNC Symbol;Acc:HGNC:28156]	1.00706	0.501993	1.00442		0.680528	0.501993	0.438988
ENSG00000179292	TMEM151A	transmembrane protein 151A [Source:HGNC Symbol;Acc:HGNC:28497]	1.40516	0.701271	1.00269		0.70358	0.701271	0.00474059
ENSG00000138802	SEC24B	SEC24 family member B [Source:HGNC Symbol;Acc:HGNC:10704]	1.45434	0.726354	1.00162		0.956122	0.726354	0.396522
ENSG00000109586	GALNT7	polypeptide N-acetylgalactosaminyltransferase 7 [Source:HGNC Symbol;Acc:HGNC:4129]	0.959292	0.479316	1.00099		0.549818	0.479316	0.197976
ENSG00000105325	FZR1	fizzy/cell division cycle 20 related 1 [Source:HGNC Symbol;Acc:HGNC:24824]	1.69627	0.847951	1.00031		0.61738	0.847951	-0.457824
ENSG00000088826	SMOX	spermine oxidase [Source:HGNC Symbol;Acc:HGNC:15862]	1.46186	0.73082	1.00021		0.779334	0.73082	0.0927255
ENSG00000114904	NEK4	NIMA-related kinase 4 [Source:HGNC Symbol;Acc:HGNC:11399]	1.25567	0.62778	1.00012		0.515193	0.62778	-0.285147
ENSG00000167461	RAB8A	RAB8A, member RAS oncogene family [Source:HGNC Symbol;Acc:HGNC:7007]	1.35173	0.675982	0.999753		0.597935	0.675982	-0.176996
ENSG00000198513	ATL1	atlastin GTPase 1 [Source:HGNC Symbol;Acc:HGNC:11231]	1.82904	0.914998	0.99925		0.610308	0.914998	-0.58423
ENSG00000138944	KIAA1644	KIAA1644 [Source:HGNC Symbol;Acc:HGNC:29335]	1.50817	0.754612	0.998995		0.883516	0.754612	0.22752
ENSG00000205269	TMEM170B	transmembrane protein 170B [Source:HGNC Symbol;Acc:HGNC:34244]	1.71999	0.8606	0.998983		1.09757	0.8606	0.350903
ENSG00000184205	TSPYL2	TSPY-like 2 [Source:HGNC Symbol;Acc:HGNC:24358]	2.36636	1.18408	0.998906		2.31595	1.18408	0.96784
ENSG00000180044	C3orf80	chromosome 3 open reading frame 80 [Source:HGNC Symbol;Acc:HGNC:40048]	0.494347	0.247438	0.998457		0.331435	0.247438	0.421659
ENSG00000132005	RFX1	regulatory factor X, 1 (influences HLA class II expression) [Source:HGNC Symbol;Acc:HGNC:9982]	1.3131	0.657303	0.998348		1.07403	0.657303	0.70841
ENSG00000168303	MPLKIP	M-phase specific PLK1 interacting protein [Source:HGNC Symbol;Acc:HGNC:16002]	1.04233	0.521863	0.998073		0.62452	0.521863	0.259076
ENSG00000126767	ELK1	ELK1, member of ETS oncogene family [Source:HGNC Symbol;Acc:HGNC:3321]	1.64524	0.823915	0.997729		0.670816	0.823915	-0.296578
ENSG00000103343	ZNF174	zinc finger protein 174 [Source:HGNC Symbol;Acc:HGNC:12963]	0.994787	0.498284	0.997421		0.433438	0.498284	-0.20114
ENSG00000104221	BRF2	BRF2, RNA polymerase III transcription initiation factor 50 kDa subunit [Source:HGNC Symbol;Acc:HGNC:17298]	0.892305	0.447187	0.996659		0.437963	0.447187	-0.0300698
ENSG00000111912	NCOA7	nuclear receptor coactivator 7 [Source:HGNC Symbol;Acc:HGNC:21081]	1.47372	0.738591	0.99661		0.772215	0.738591	0.0642265
ENSG00000213533	TMEM110	transmembrane protein 110 [Source:HGNC Symbol;Acc:HGNC:30526]	1.06864	0.535791	0.99604		0.543335	0.535791	0.0201716
ENSG00000254093	PINX1	PIN2/TERF1 interacting, telomerase inhibitor 1 [Source:HGNC Symbol;Acc:HGNC:30046]	1.1449	0.574242	0.995485		0.578032	0.574242	0.00949194
ENSG00000212493	SNORD19	small nucleolar RNA, C/D box 19 [Source:HGNC Symbol;Acc:HGNC:32717]	1.32164	0.663192	0.994837		1.37496	0.663192	1.0519
ENSG00000125656	CLPP	caseinolytic mitochondrial matrix peptidase proteolytic subunit [Source:HGNC Symbol;Acc:HGNC:2084]	1.32719	0.666431	0.993846		0.620023	0.666431	-0.104134
ENSG00000164284	GRPEL2	GrpE-like 2, mitochondrial (E. coli) [Source:HGNC Symbol;Acc:HGNC:21060]	1.32483	0.666216	0.991748		0.868349	0.666216	0.382285
ENSG00000197381	ADARB1	adenosine deaminase, RNA-specific, B1 [Source:HGNC Symbol;Acc:HGNC:226]	2.00151	1.00727	0.990644		1.20404	1.00727	0.257441
ENSG00000125633	CCDC93	coiled-coil domain containing 93 [Source:HGNC Symbol;Acc:HGNC:25611]	1.15635	0.581962	0.990583		0.703469	0.581962	0.273563
ENSG00000154217	PITPNC1	phosphatidylinositol transfer protein, cytoplasmic 1 [Source:HGNC Symbol;Acc:HGNC:21045]	1.96208	0.987776	0.990126		1.39574	0.987776	0.498771
ENSG00000198885	ITPRIPL1	inositol 1,4,5-trisphosphate receptor interacting protein-like 1 [Source:HGNC Symbol;Acc:HGNC:29371]	0.833141	0.419896	0.988529		0.343438	0.419896	-0.289981
ENSG00000160325	CACFD1	calcium channel flower domain containing 1 [Source:HGNC Symbol;Acc:HGNC:1365]	1.3011	0.656001	0.987968		0.705347	0.656001	0.104636
ENSG00000188766	SPRED3	sprouty-related, EVH1 domain containing 3 [Source:HGNC Symbol;Acc:HGNC:31041]	1.53787	0.775678	0.987404		1.29731	0.775678	0.74199
ENSG00000157827	FMNL2	formin-like 2 [Source:HGNC Symbol;Acc:HGNC:18267]	1.22957	0.620215	0.987309		0.796103	0.620215	0.360188
ENSG00000182272	B4GALNT4	beta-1,4-N-acetyl-galactosaminyl transferase 4 [Source:HGNC Symbol;Acc:HGNC:26315]	1.46719	0.740278	0.986921		0.727563	0.740278	-0.0249945
ENSG00000136710	CCDC115	coiled-coil domain containing 115 [Source:HGNC Symbol;Acc:HGNC:28178]	1.06113	0.535851	0.985694		0.49054	0.535851	-0.127461
ENSG00000173011	TADA2B	transcriptional adaptor 2B [Source:HGNC Symbol;Acc:HGNC:30781]	1.25285	0.632851	0.985282		0.786517	0.632851	0.313614
ENSG00000181915	ADO	2-aminoethanethiol (cysteamine) dioxygenase [Source:HGNC Symbol;Acc:HGNC:23506]	1.19607	0.604171	0.985267		0.875182	0.604171	0.534626
ENSG00000107815	C10orf2	chromosome 10 open reading frame 2 [Source:HGNC Symbol;Acc:HGNC:1160]	0.861408	0.435295	0.984705		0.629	0.435295	0.531068
ENSG00000163611	SPICE1	spindle and centriole associated protein 1 [Source:HGNC Symbol;Acc:HGNC:25083]	1.22459	0.61884	0.984655		0.615998	0.61884	-0.0066409
ENSG00000158292	GPR153	G protein-coupled receptor 153 [Source:HGNC Symbol;Acc:HGNC:23618]	1.51378	0.765113	0.984406		0.904186	0.765113	0.240946
ENSG00000011243	AKAP8L	A kinase (PRKA) anchor protein 8-like [Source:HGNC Symbol;Acc:HGNC:29857]	1.82174	0.920912	0.984179		0.966264	0.920912	0.0693538
ENSG00000033100	CHPF2	chondroitin polymerizing factor 2 [Source:HGNC Symbol;Acc:HGNC:29270]	1.04898	0.530398	0.983839		0.626979	0.530398	0.241341
ENSG00000177732	SOX12	SRY (sex determining region Y)-box 12 [Source:HGNC Symbol;Acc:HGNC:11198]	1.41915	0.71777	0.98343		0.716883	0.71777	-0.00178451
ENSG00000076826	CAMSAP3	calmodulin regulated spectrin-associated protein family, member 3 [Source:HGNC Symbol;Acc:HGNC:29307]	1.54996	0.784203	0.982929		0.554482	0.784203	-0.500087
ENSG00000140830	TXNL4B	thioredoxin-like 4B [Source:HGNC Symbol;Acc:HGNC:26041]	1.49135	0.754753	0.982544		0.698301	0.754753	-0.112155
ENSG00000120278	PLEKHG1	pleckstrin homology domain containing, family G (with RhoGef domain) member 1 [Source:HGNC Symbol;Acc:HGNC:20884]	1.34846	0.682646	0.982099		0.924041	0.682646	0.436819
ENSG00000187556	NANOS3	nanos homolog 3 (Drosophila) [Source:HGNC Symbol;Acc:HGNC:22048]	1.28964	0.653685	0.980301		0.693132	0.653685	0.0845345
ENSG00000110400	PVRL1	poliovirus receptor-related 1 (herpesvirus entry mediator C) [Source:HGNC Symbol;Acc:HGNC:9706]	1.55416	0.787787	0.980257		1.3834	0.787787	0.812341
ENSG00000154479	CCDC173	coiled-coil domain containing 173 [Source:HGNC Symbol;Acc:HGNC:25064]	2.27465	1.1535	0.979625		0.732782	1.1535	-0.654564
ENSG00000095397	DFNB31	deafness, autosomal recessive 31 [Source:HGNC Symbol;Acc:HGNC:16361]	2.81519	1.42942	0.977802		1.47434	1.42942	0.0446389
ENSG00000171448	ZBTB26	zinc finger and BTB domain containing 26 [Source:HGNC Symbol;Acc:HGNC:23383]	0.985551	0.501066	0.975931		0.555876	0.501066	0.149764
ENSG00000073536	NLE1	notchless homolog 1 (Drosophila) [Source:HGNC Symbol;Acc:HGNC:19889]	1.19924	0.609825	0.975649		0.467831	0.609825	-0.382408
ENSG00000106012	IQCE	IQ motif containing E [Source:HGNC Symbol;Acc:HGNC:29171]	1.2746	0.648205	0.975518		0.593919	0.648205	-0.126185
ENSG00000158805	ZNF276	zinc finger protein 276 [Source:HGNC Symbol;Acc:HGNC:23330]	1.11916	0.569869	0.973711		0.745309	0.569869	0.387207
ENSG00000133935	C14orf1	chromosome 14 open reading frame 1 [Source:HGNC Symbol;Acc:HGNC:1187]	1.7548	0.894109	0.972784		0.828012	0.894109	-0.110798
ENSG00000210184	MT-TS2	mitochondrially encoded tRNA serine 2 (AGU/C) [Source:HGNC Symbol;Acc:HGNC:7498]	0.980373	0.499541	0.972729		1.24635	0.499541	1.31904
ENSG00000207611	MIR149	microRNA 149 [Source:HGNC Symbol;Acc:HGNC:31536]	0.453411	0.231041	0.972671		0.263862	0.231041	0.191637
ENSG00000174109	C16orf91	chromosome 16 open reading frame 91 [Source:HGNC Symbol;Acc:HGNC:27558]	0.936231	0.47785	0.970306		0.52087	0.47785	0.124365
ENSG00000107290	SETX	senataxin [Source:HGNC Symbol;Acc:HGNC:445]	1.35011	0.689106	0.970283		0.835381	0.689106	0.277707
ENSG00000133275	CSNK1G2	casein kinase 1, gamma 2 [Source:HGNC Symbol;Acc:HGNC:2455]	2.28784	1.16784	0.970145		1.21692	1.16784	0.0594013
ENSG00000166526	ZNF3	zinc finger protein 3 [Source:HGNC Symbol;Acc:HGNC:13089]	0.567109	0.289506	0.970033		0.300137	0.289506	0.0520262
ENSG00000198824	CHAMP1	chromosome alignment maintaining phosphoprotein 1 [Source:HGNC Symbol;Acc:HGNC:20311]	0.6939	0.354289	0.969802		0.514856	0.354289	0.539245
ENSG00000198929	NOS1AP	nitric oxide synthase 1 (neuronal) adaptor protein [Source:HGNC Symbol;Acc:HGNC:16859]	1.54004	0.786438	0.969566		1.30634	0.786438	0.732125
ENSG00000108239	TBC1D12	TBC1 domain family, member 12 [Source:HGNC Symbol;Acc:HGNC:29082]	1.4741	0.752915	0.969277		0.931242	0.752915	0.306671
ENSG00000204128	C2orf72	chromosome 2 open reading frame 72 [Source:HGNC Symbol;Acc:HGNC:27418]	0.855744	0.437191	0.968916		0.632075	0.437191	0.531833
ENSG00000052723	SIKE1	suppressor of IKBKE 1 [Source:HGNC Symbol;Acc:HGNC:26119]	1.3108	0.669937	0.968349		0.76346	0.669937	0.188528
ENSG00000142327	RNPEPL1	arginyl aminopeptidase (aminopeptidase B)-like 1 [Source:HGNC Symbol;Acc:HGNC:10079]	0.799786	0.408787	0.968265		0.557411	0.408787	0.447393
ENSG00000181026	AEN	apoptosis enhancing nuclease [Source:HGNC Symbol;Acc:HGNC:25722]	1.71634	0.877447	0.967954		0.747267	0.877447	-0.231689
ENSG00000177706	FAM20C	family with sequence similarity 20, member C [Source:HGNC Symbol;Acc:HGNC:22140]	1.47977	0.75676	0.967468		0.783901	0.75676	0.0508366
ENSG00000166261	ZNF202	zinc finger protein 202 [Source:HGNC Symbol;Acc:HGNC:12994]	0.814437	0.416715	0.96674		0.303887	0.416715	-0.455527
ENSG00000136802	LRRC8A	leucine rich repeat containing 8 family, member A [Source:HGNC Symbol;Acc:HGNC:19027]	2.18882	1.12013	0.966491		0.849541	1.12013	-0.398906
ENSG00000214113	LYRM4	LYR motif containing 4 [Source:HGNC Symbol;Acc:HGNC:21365]	1.41959	0.726545	0.966347		0.548987	0.726545	-0.40428
ENSG00000099377	HSD3B7	hydroxy-delta-5-steroid dehydrogenase, 3 beta- and steroid delta-isomerase 7 [Source:HGNC Symbol;Acc:HGNC:18324]	3.03933	1.55562	0.966263		1.75217	1.55562	0.171651
ENSG00000105821	DNAJC2	DnaJ (Hsp40) homolog, subfamily C, member 2 [Source:HGNC Symbol;Acc:HGNC:13192]	1.60194	0.820438	0.965353		0.640772	0.820438	-0.356584
ENSG00000104490	NCALD	neurocalcin delta [Source:HGNC Symbol;Acc:HGNC:7655]	1.81318	0.929135	0.964559		1.10666	0.929135	0.252254
ENSG00000144749	LRIG1	leucine-rich repeats and immunoglobulin-like domains 1 [Source:HGNC Symbol;Acc:HGNC:17360]	1.45895	0.747742	0.964317		1.11199	0.747742	0.572529
ENSG00000178252	WDR6	WD repeat domain 6 [Source:HGNC Symbol;Acc:HGNC:12758]	1.09406	0.56125	0.96297		0.643006	0.56125	0.196188
ENSG00000213390	ARHGAP19	Rho GTPase activating protein 19 [Source:HGNC Symbol;Acc:HGNC:23724]	1.1913	0.611879	0.961214		0.860195	0.611879	0.491415
ENSG00000170265	ZNF282	zinc finger protein 282 [Source:HGNC Symbol;Acc:HGNC:13076]	0.90676	0.465867	0.960803		0.548028	0.465867	0.23433
ENSG00000134532	SOX5	SRY (sex determining region Y)-box 5 [Source:HGNC Symbol;Acc:HGNC:11201]	1.37776	0.707953	0.960595		0.970794	0.707953	0.455511
ENSG00000157734	SNX22	sorting nexin 22 [Source:HGNC Symbol;Acc:HGNC:16315]	0.601475	0.309093	0.960464		0.477198	0.309093	0.626547
ENSG00000120519	SLC10A7	solute carrier family 10, member 7 [Source:HGNC Symbol;Acc:HGNC:23088]	1.14091	0.58687	0.959066		0.777227	0.58687	0.405296
ENSG00000141098	GFOD2	glucose-fructose oxidoreductase domain containing 2 [Source:HGNC Symbol;Acc:HGNC:28159]	1.512	0.778329	0.958002		0.592294	0.778329	-0.394066
ENSG00000160877	NACC1	nucleus accumbens associated 1, BEN and BTB (POZ) domain containing [Source:HGNC Symbol;Acc:HGNC:20967]	1.66146	0.855466	0.957669		0.92639	0.855466	0.114909
ENSG00000144909	OSBPL11	oxysterol binding protein-like 11 [Source:HGNC Symbol;Acc:HGNC:16397]	1.72952	0.890693	0.957372		0.887493	0.890693	-0.00519213
ENSG00000182150	ERCC6L2	excision repair cross-complementation group 6-like 2 [Source:HGNC Symbol;Acc:HGNC:26922]	0.864957	0.445579	0.956947		0.504407	0.445579	0.178906
ENSG00000131043	AAR2	AAR2 splicing factor homolog [Source:HGNC Symbol;Acc:HGNC:15886]	0.834738	0.430096	0.956664		0.5139	0.430096	0.256827
ENSG00000174529	TMEM81	transmembrane protein 81 [Source:HGNC Symbol;Acc:HGNC:32349]	1.30394	0.672166	0.955991		0.788284	0.672166	0.229898
ENSG00000158458	NRG2	neuregulin 2 [Source:HGNC Symbol;Acc:HGNC:7998]	1.29153	0.666906	0.95353		0.795534	0.666906	0.25444
ENSG00000169193	CCDC126	coiled-coil domain containing 126 [Source:HGNC Symbol;Acc:HGNC:22398]	1.11056	0.573974	0.952229		0.579055	0.573974	0.0127136
ENSG00000169155	ZBTB43	zinc finger and BTB domain containing 43 [Source:HGNC Symbol;Acc:HGNC:17908]	0.995577	0.514595	0.952097		0.855007	0.514595	0.732499
ENSG00000134686	PHC2	polyhomeotic homolog 2 (Drosophila) [Source:HGNC Symbol;Acc:HGNC:3183]	1.0852	0.561672	0.950162		0.689056	0.561672	0.294893
ENSG00000103194	USP10	ubiquitin specific peptidase 10 [Source:HGNC Symbol;Acc:HGNC:12608]	1.42825	0.739524	0.94958		0.966716	0.739524	0.386495
ENSG00000146540	C7orf50	chromosome 7 open reading frame 50 [Source:HGNC Symbol;Acc:HGNC:22421]	1.05534	0.546747	0.948758		0.388011	0.546747	-0.494777
ENSG00000198915	RASGEF1A	RasGEF domain family, member 1A [Source:HGNC Symbol;Acc:HGNC:24246]	1.67274	0.8669	0.94828		0.818494	0.8669	-0.0828925
ENSG00000120686	UFM1	ubiquitin-fold modifier 1 [Source:HGNC Symbol;Acc:HGNC:20597]	1.64372	0.85242	0.94733		0.780602	0.85242	-0.126978
ENSG00000113734	BNIP1	BCL2/adenovirus E1B 19kDa interacting protein 1 [Source:HGNC Symbol;Acc:HGNC:1082]	1.11964	0.580833	0.946846		0.633516	0.580833	0.125257
ENSG00000122033	MTIF3	mitochondrial translational initiation factor 3 [Source:HGNC Symbol;Acc:HGNC:29788]	0.819871	0.425467	0.94635		0.499373	0.425467	0.231072
ENSG00000198908	BHLHB9	basic helix-loop-helix domain containing, class B, 9 [Source:HGNC Symbol;Acc:HGNC:29353]	2.22544	1.15509	0.94608		0.865928	1.15509	-0.415689
ENSG00000162972	C2orf47	chromosome 2 open reading frame 47 [Source:HGNC Symbol;Acc:HGNC:26198]	1.10064	0.571509	0.945495		0.634178	0.571509	0.15011
ENSG00000134851	TMEM165	transmembrane protein 165 [Source:HGNC Symbol;Acc:HGNC:30760]	1.53167	0.795715	0.94478		0.941815	0.795715	0.243192
ENSG00000268182	SMIM17	small integral membrane protein 17 [Source:HGNC Symbol;Acc:HGNC:27114]	1.00394	0.521591	0.944676		0.415073	0.521591	-0.329553
ENSG00000149177	PTPRJ	protein tyrosine phosphatase, receptor type, J [Source:HGNC Symbol;Acc:HGNC:9673]	1.05445	0.547911	0.944472		0.755161	0.547911	0.462842
ENSG00000188997	KCTD21	potassium channel tetramerization domain containing 21 [Source:HGNC Symbol;Acc:HGNC:27452]	0.777338	0.404134	0.943708		0.574786	0.404134	0.508189
ENSG00000183060	LYSMD4	LysM, putative peptidoglycan-binding, domain containing 4 [Source:HGNC Symbol;Acc:HGNC:26571]	0.750459	0.390174	0.943656		0.366175	0.390174	-0.0915836
ENSG00000175414	ARL10	ADP-ribosylation factor-like 10 [Source:HGNC Symbol;Acc:HGNC:22042]	1.08438	0.563929	0.943286		0.50805	0.563929	-0.150544
ENSG00000178761	FAM219B	family with sequence similarity 219, member B [Source:HGNC Symbol;Acc:HGNC:24695]	1.21418	0.631999	0.941985		0.506814	0.631999	-0.318466
ENSG00000106123	EPHB6	EPH receptor B6 [Source:HGNC Symbol;Acc:HGNC:3396]	1.03154	0.537102	0.941526		0.490456	0.537102	-0.131071
ENSG00000205250	E2F4	E2F transcription factor 4, p107/p130-binding [Source:HGNC Symbol;Acc:HGNC:3118]	1.02658	0.534704	0.941035		0.826582	0.534704	0.628418
ENSG00000102879	CORO1A	coronin, actin binding protein, 1A [Source:HGNC Symbol;Acc:HGNC:2252]	1.51201	0.78809	0.940039		0.487875	0.78809	-0.69185
ENSG00000163273	NPPC	natriuretic peptide C [Source:HGNC Symbol;Acc:HGNC:7941]	2.41041	1.25645	0.939931		1.48158	1.25645	0.237788
ENSG00000134759	ELP2	elongator acetyltransferase complex subunit 2 [Source:HGNC Symbol;Acc:HGNC:18248]	1.24625	0.649674	0.939805		0.588156	0.649674	-0.143517
ENSG00000135249	RINT1	RAD50 interactor 1 [Source:HGNC Symbol;Acc:HGNC:21876]	1.05584	0.550572	0.939393		0.680828	0.550572	0.306361
ENSG00000145907	G3BP1	GTPase activating protein (SH3 domain) binding protein 1 [Source:HGNC Symbol;Acc:HGNC:30292]	1.35144	0.705493	0.937792		0.79084	0.705493	0.164755
ENSG00000179456	ZBTB18	zinc finger and BTB domain containing 18 [Source:HGNC Symbol;Acc:HGNC:13030]	1.62454	0.848513	0.937019		0.487044	0.848513	-0.800884
ENSG00000082515	MRPL22	mitochondrial ribosomal protein L22 [Source:HGNC Symbol;Acc:HGNC:14480]	1.33999	0.699892	0.937016		0.648802	0.699892	-0.109353
ENSG00000166797	FAM96A	family with sequence similarity 96, member A [Source:HGNC Symbol;Acc:HGNC:26235]	1.02066	0.533338	0.936386		0.601395	0.533338	0.173264
ENSG00000115942	ORC2	origin recognition complex, subunit 2 [Source:HGNC Symbol;Acc:HGNC:8488]	1.10318	0.577155	0.934642		0.694327	0.577155	0.266656
ENSG00000109220	CHIC2	cysteine-rich hydrophobic domain 2 [Source:HGNC Symbol;Acc:HGNC:1935]	2.15155	1.12613	0.934009		0.969674	1.12613	-0.215798
ENSG00000165300	SLITRK5	SLIT and NTRK-like family, member 5 [Source:HGNC Symbol;Acc:HGNC:20295]	0.717459	0.375628	0.933593		0.783699	0.375628	1.061
ENSG00000163781	TOPBP1	topoisomerase (DNA) II binding protein 1 [Source:HGNC Symbol;Acc:HGNC:17008]	1.54294	0.807902	0.933434		0.926318	0.807902	0.197327
ENSG00000141030	COPS3	COP9 signalosome subunit 3 [Source:HGNC Symbol;Acc:HGNC:2239]	1.37193	0.718668	0.932807		0.741237	0.718668	0.0446102
ENSG00000183161	FANCF	Fanconi anemia, complementation group F [Source:HGNC Symbol;Acc:HGNC:3587]	0.519008	0.271916	0.932597		0.693165	0.271916	1.35004
ENSG00000170037	CNTROB	centrobin, centrosomal BRCA2 interacting protein [Source:HGNC Symbol;Acc:HGNC:29616]	1.64715	0.863475	0.931746		0.62964	0.863475	-0.455627
ENSG00000100926	TM9SF1	transmembrane 9 superfamily member 1 [Source:HGNC Symbol;Acc:HGNC:11864]	1.36468	0.715556	0.93143		0.983467	0.715556	0.458812
ENSG00000133657	ATP13A3	ATPase type 13A3 [Source:HGNC Symbol;Acc:HGNC:24113]	1.75841	0.922242	0.931053		1.14215	0.922242	0.308537
ENSG00000104228	TRIM35	tripartite motif containing 35 [Source:HGNC Symbol;Acc:HGNC:16285]	1.43997	0.755848	0.929866		0.589224	0.755848	-0.35928
ENSG00000115946	PNO1	partner of NOB1 homolog [Source:HGNC Symbol;Acc:HGNC:32790]	1.36774	0.71804	0.929658		0.568237	0.71804	-0.337572
ENSG00000151092	NGLY1	N-glycanase 1 [Source:HGNC Symbol;Acc:HGNC:17646]	1.21233	0.636565	0.929397		0.575296	0.636565	-0.146005
ENSG00000116863	ADPRHL2	ADP-ribosylhydrolase like 2 [Source:HGNC Symbol;Acc:HGNC:21304]	0.979891	0.514825	0.92854		0.59639	0.514825	0.212176
ENSG00000203877	RIPPLY2	ripply transcriptional repressor 2 [Source:HGNC Symbol;Acc:HGNC:21390]	1.23818	0.650554	0.928477		0.361555	0.650554	-0.847454
ENSG00000170113	NIPA1	non imprinted in Prader-Willi/Angelman syndrome 1 [Source:HGNC Symbol;Acc:HGNC:17043]	1.48855	0.782407	0.927918		0.705849	0.782407	-0.148561
ENSG00000109171	SLAIN2	SLAIN motif family, member 2 [Source:HGNC Symbol;Acc:HGNC:29282]	1.79501	0.943897	0.927291		0.994929	0.943897	0.0759631
ENSG00000205476	CCDC85C	coiled-coil domain containing 85C [Source:HGNC Symbol;Acc:HGNC:35459]	1.4283	0.751101	0.927219		0.926359	0.751101	0.302566
ENSG00000094880	CDC23	cell division cycle 23 [Source:HGNC Symbol;Acc:HGNC:1724]	1.07346	0.564635	0.926875		0.552397	0.564635	-0.0316133
ENSG00000188763	FZD9	frizzled class receptor 9 [Source:HGNC Symbol;Acc:HGNC:4047]	1.06891	0.56255	0.926091		0.502744	0.56255	-0.162156
ENSG00000101343	CRNKL1	crooked neck pre-mRNA splicing factor 1 [Source:HGNC Symbol;Acc:HGNC:15762]	1.10863	0.583468	0.926048		0.641188	0.583468	0.136093
ENSG00000088256	GNA11	guanine nucleotide binding protein (G protein), alpha 11 (Gq class) [Source:HGNC Symbol;Acc:HGNC:4379]	1.65807	0.87354	0.924558		0.854532	0.87354	-0.0317399
ENSG00000165023	DIRAS2	DIRAS family, GTP-binding RAS-like 2 [Source:HGNC Symbol;Acc:HGNC:19323]	0.932097	0.491293	0.923896		0.667346	0.491293	0.441851
ENSG00000136830	FAM129B	family with sequence similarity 129, member B [Source:HGNC Symbol;Acc:HGNC:25282]	1.16684	0.615151	0.92359		0.534059	0.615151	-0.203942
ENSG00000158941	CCAR2	cell cycle and apoptosis regulator 2 [Source:HGNC Symbol;Acc:HGNC:23360]	1.08166	0.570848	0.922075		0.603875	0.570848	0.0811438
ENSG00000155545	MIER3	mesoderm induction early response 1, family member 3 [Source:HGNC Symbol;Acc:HGNC:26678]	1.06708	0.563163	0.922046		0.885007	0.563163	0.652136
ENSG00000116685	KIAA2013	KIAA2013 [Source:HGNC Symbol;Acc:HGNC:28513]	1.18735	0.626933	0.921359		1.27265	0.626933	1.02146
ENSG00000179148	ALOXE3	arachidonate lipoxygenase 3 [Source:HGNC Symbol;Acc:HGNC:13743]	4.27779	2.25957	0.920818		2.88946	2.25957	0.354753
ENSG00000175155	YPEL2	yippee-like 2 [Source:HGNC Symbol;Acc:HGNC:18326]	1.65896	0.876542	0.920382		1.34038	0.876542	0.612748
ENSG00000066697	MSANTD3	Myb/SANT-like DNA-binding domain containing 3 [Source:HGNC Symbol;Acc:HGNC:23370]	1.69703	0.896788	0.920174		0.804363	0.896788	-0.156921
ENSG00000065559	MAP2K4	mitogen-activated protein kinase kinase 4 [Source:HGNC Symbol;Acc:HGNC:6844]	1.62601	0.859331	0.920053		0.968868	0.859331	0.173086
ENSG00000266524	GDF10	growth differentiation factor 10 [Source:HGNC Symbol;Acc:HGNC:4215]	1.33634	0.706316	0.919905		0.721446	0.706316	0.0305773
ENSG00000173473	SMARCC1	SWI/SNF related, matrix associated, actin dependent regulator of chromatin, subfamily c, member 1 [Source:HGNC Symbol;Acc:HGNC:11104]	1.36781	0.724125	0.917562		0.804459	0.724125	0.151781
ENSG00000163607	GTPBP8	GTP-binding protein 8 (putative) [Source:HGNC Symbol;Acc:HGNC:25007]	1.34255	0.710985	0.91708		0.672655	0.710985	-0.079954
ENSG00000125354	2006-09-01	septin 6 [Source:HGNC Symbol;Acc:HGNC:15848]	1.42898	0.75691	0.916787		0.63445	0.75691	-0.254616
ENSG00000024048	UBR2	ubiquitin protein ligase E3 component n-recognin 2 [Source:HGNC Symbol;Acc:HGNC:21289]	0.859252	0.455217	0.916528		0.778998	0.455217	0.775067
ENSG00000099904	ZDHHC8	zinc finger, DHHC-type containing 8 [Source:HGNC Symbol;Acc:HGNC:18474]	1.18527	0.628168	0.915998		0.786008	0.628168	0.323393
ENSG00000125484	GTF3C4	general transcription factor IIIC, polypeptide 4, 90kDa [Source:HGNC Symbol;Acc:HGNC:4667]	1.11983	0.593592	0.915731		0.632869	0.593592	0.0924363
ENSG00000150967	ABCB9	ATP-binding cassette, sub-family B (MDR/TAP), member 9 [Source:HGNC Symbol;Acc:HGNC:50]	0.955504	0.506897	0.91457		0.482356	0.506897	-0.0715949
ENSG00000132613	MTSS1L	metastasis suppressor 1-like [Source:HGNC Symbol;Acc:HGNC:25094]	1.97681	1.04879	0.914442		1.23501	1.04879	0.235788
ENSG00000197879	MYO1C	myosin IC [Source:HGNC Symbol;Acc:HGNC:7597]	1.40386	0.744909	0.914263		1.04944	0.744909	0.494486
ENSG00000011198	ABHD5	abhydrolase domain containing 5 [Source:HGNC Symbol;Acc:HGNC:21396]	1.3714	0.727726	0.914179		0.67182	0.727726	-0.115322
ENSG00000173230	GOLGB1	golgin B1 [Source:HGNC Symbol;Acc:HGNC:4429]	1.22414	0.649746	0.913822		0.739472	0.649746	0.186622
ENSG00000181220	ZNF746	zinc finger protein 746 [Source:HGNC Symbol;Acc:HGNC:21948]	0.892446	0.47401	0.912848		0.579925	0.47401	0.29095
ENSG00000114541	FRMD4B	FERM domain containing 4B [Source:HGNC Symbol;Acc:HGNC:24886]	1.42298	0.756275	0.911931		0.61558	0.756275	-0.296964
ENSG00000137656	BUD13	BUD13 homolog [Source:HGNC Symbol;Acc:HGNC:28199]	0.929199	0.493857	0.911893		0.492441	0.493857	-0.00414468
ENSG00000196872	KIAA1211L	KIAA1211-like [Source:HGNC Symbol;Acc:HGNC:33454]	1.65398	0.879159	0.911743		1.00269	0.879159	0.189678
ENSG00000272886	DCP1A	decapping mRNA 1A [Source:HGNC Symbol;Acc:HGNC:18714]	1.18134	0.627979	0.911635		0.81787	0.627979	0.381155
ENSG00000166455	C16orf46	chromosome 16 open reading frame 46 [Source:HGNC Symbol;Acc:HGNC:26525]	1.27795	0.679478	0.91133		0.601585	0.679478	-0.175657
ENSG00000089737	DDX24	DEAD (Asp-Glu-Ala-Asp) box helicase 24 [Source:HGNC Symbol;Acc:HGNC:13266]	1.40514	0.747561	0.910451		0.80196	0.747561	0.101339
ENSG00000213088	ACKR1	atypical chemokine receptor 1 (Duffy blood group) [Source:HGNC Symbol;Acc:HGNC:4035]	1.77447	0.944234	0.910175		1.01531	0.944234	0.104697
ENSG00000168014	C2CD3	C2 calcium-dependent domain containing 3 [Source:HGNC Symbol;Acc:HGNC:24564]	1.08367	0.576651	0.910155		0.513916	0.576651	-0.166167
ENSG00000179454	KLHL28	kelch-like family member 28 [Source:HGNC Symbol;Acc:HGNC:19741]	0.925599	0.49271	0.909649		0.663022	0.49271	0.428319
ENSG00000168993	CPLX1	complexin 1 [Source:HGNC Symbol;Acc:HGNC:2309]	1.72025	0.916083	0.909069		0.782379	0.916083	-0.227612
ENSG00000184156	KCNQ3	potassium channel, voltage gated KQT-like subfamily Q, member 3 [Source:HGNC Symbol;Acc:HGNC:6297]	1.87073	0.996496	0.908663		1.41606	0.996496	0.506949
ENSG00000164897	TMUB1	transmembrane and ubiquitin-like domain containing 1 [Source:HGNC Symbol;Acc:HGNC:21709]	2.55005	1.35985	0.907074		0.861639	1.35985	-0.658296
ENSG00000105298	CACTIN	cactin, spliceosome C complex subunit [Source:HGNC Symbol;Acc:HGNC:29938]	1.10022	0.586737	0.907001		0.743881	0.586737	0.342358
ENSG00000123395	ATG101	autophagy related 101 [Source:HGNC Symbol;Acc:HGNC:25679]	2.70404	1.44206	0.906984		1.20231	1.44206	-0.262318
ENSG00000163812	ZDHHC3	zinc finger, DHHC-type containing 3 [Source:HGNC Symbol;Acc:HGNC:18470]	1.64593	0.878269	0.90617		0.949592	0.878269	0.112644
ENSG00000158796	DEDD	death effector domain containing [Source:HGNC Symbol;Acc:HGNC:2755]	1.5226	0.812839	0.905499		1.00621	0.812839	0.307895
ENSG00000157881	PANK4	pantothenate kinase 4 [Source:HGNC Symbol;Acc:HGNC:19366]	1.29652	0.692286	0.905202		0.946963	0.692286	0.45194
ENSG00000111358	GTF2H3	general transcription factor IIH, polypeptide 3, 34kDa [Source:HGNC Symbol;Acc:HGNC:4657]	0.454892	0.242978	0.904699		0.368275	0.242978	0.599959
ENSG00000076650	GPATCH1	G patch domain containing 1 [Source:HGNC Symbol;Acc:HGNC:24658]	0.558224	0.298476	0.90323		0.462087	0.298476	0.630552
ENSG00000004478	FKBP4	FK506 binding protein 4, 59kDa [Source:HGNC Symbol;Acc:HGNC:3720]	1.57532	0.842736	0.90249		0.804874	0.842736	-0.0663177
ENSG00000120992	LYPLA1	lysophospholipase I [Source:HGNC Symbol;Acc:HGNC:6737]	1.01976	0.545733	0.901967		0.543183	0.545733	-0.00675742
ENSG00000100124	ANKRD54	ankyrin repeat domain 54 [Source:HGNC Symbol;Acc:HGNC:25185]	1.51533	0.811577	0.900829		0.913892	0.811577	0.171296
ENSG00000169972	PUSL1	pseudouridylate synthase-like 1 [Source:HGNC Symbol;Acc:HGNC:26914]	1.65096	0.884464	0.900427		0.894033	0.884464	0.0155254
ENSG00000198719	DLL1	delta-like 1 (Drosophila) [Source:HGNC Symbol;Acc:HGNC:2908]	0.939616	0.503492	0.900102		0.945576	0.503492	0.909224
ENSG00000135454	B4GALNT1	beta-1,4-N-acetyl-galactosaminyl transferase 1 [Source:HGNC Symbol;Acc:HGNC:4117]	1.25686	0.673593	0.899877		0.446343	0.673593	-0.593725
ENSG00000160959	LRRC14	leucine rich repeat containing 14 [Source:HGNC Symbol;Acc:HGNC:20419]	0.959062	0.514066	0.89967		0.566202	0.514066	0.139363
ENSG00000171016	PYGO1	pygopus family PHD finger 1 [Source:HGNC Symbol;Acc:HGNC:30256]	1.19031	0.638489	0.898603		0.635002	0.638489	-0.00789989
ENSG00000047365	ARAP2	ArfGAP with RhoGAP domain, ankyrin repeat and PH domain 2 [Source:HGNC Symbol;Acc:HGNC:16924]	1.97404	1.05905	0.898383		1.05145	1.05905	-0.0103909
ENSG00000156381	ANKRD9	ankyrin repeat domain 9 [Source:HGNC Symbol;Acc:HGNC:20096]	2.07627	1.11432	0.897831		0.907075	1.11432	-0.296872
ENSG00000008735	MAPK8IP2	mitogen-activated protein kinase 8 interacting protein 2 [Source:HGNC Symbol;Acc:HGNC:6883]	1.11231	0.59767	0.896135		0.602132	0.59767	0.0107321
ENSG00000090054	SPTLC1	serine palmitoyltransferase, long chain base subunit 1 [Source:HGNC Symbol;Acc:HGNC:11277]	1.05928	0.569254	0.895942		0.554266	0.569254	-0.0384936
ENSG00000104714	ERICH1	glutamate-rich 1 [Source:HGNC Symbol;Acc:HGNC:27234]	0.91583	0.492179	0.895895		0.586007	0.492179	0.251733
ENSG00000171960	PPIH	peptidylprolyl isomerase H (cyclophilin H) [Source:HGNC Symbol;Acc:HGNC:14651]	1.33961	0.71995	0.895847		0.684827	0.71995	-0.0721573
ENSG00000086589	RBM22	RNA binding motif protein 22 [Source:HGNC Symbol;Acc:HGNC:25503]	1.28314	0.689658	0.895726		0.908723	0.689658	0.39796
ENSG00000171421	MRPL36	mitochondrial ribosomal protein L36 [Source:HGNC Symbol;Acc:HGNC:14490]	1.09608	0.589302	0.895272		0.439438	0.589302	-0.423349
ENSG00000186007	LEMD1	LEM domain containing 1 [Source:HGNC Symbol;Acc:HGNC:18725]	1.27917	0.687801	0.895138		0.296888	0.687801	-1.21208
ENSG00000166006	KCNC2	potassium channel, voltage gated Shaw related subfamily C, member 2 [Source:HGNC Symbol;Acc:HGNC:6234]	1.4687	0.789833	0.894922		0.88141	0.789833	0.158265
ENSG00000197106	SLC6A17	solute carrier family 6 (neutral amino acid transporter), member 17 [Source:HGNC Symbol;Acc:HGNC:31399]	3.51171	1.88934	0.894291		3.90219	1.88934	1.0464
ENSG00000102572	STK24	serine/threonine kinase 24 [Source:HGNC Symbol;Acc:HGNC:11403]	1.38504	0.745519	0.893611		0.898305	0.745519	0.268962
ENSG00000133059	DSTYK	dual serine/threonine and tyrosine protein kinase [Source:HGNC Symbol;Acc:HGNC:29043]	1.46209	0.787139	0.893338		0.937882	0.787139	0.252788
ENSG00000110047	EHD1	EH-domain containing 1 [Source:HGNC Symbol;Acc:HGNC:3242]	2.0888	1.12458	0.893291		0.827841	1.12458	-0.44196
ENSG00000228672	PROB1	proline-rich basic protein 1 [Source:HGNC Symbol;Acc:HGNC:41906]	1.03062	0.555075	0.892757		0.808578	0.555075	0.542703
ENSG00000065600	TMEM206	transmembrane protein 206 [Source:HGNC Symbol;Acc:HGNC:25593]	1.03336	0.556803	0.892099		0.706072	0.556803	0.342649
ENSG00000204439	C6orf47	chromosome 6 open reading frame 47 [Source:HGNC Symbol;Acc:HGNC:19076]	0.814779	0.439061	0.891987		0.466239	0.439061	0.0866477
ENSG00000162302	RPS6KA4	ribosomal protein S6 kinase, 90kDa, polypeptide 4 [Source:HGNC Symbol;Acc:HGNC:10433]	1.07025	0.576839	0.891708		0.658867	0.576839	0.191818
ENSG00000113716	HMGXB3	HMG box domain containing 3 [Source:HGNC Symbol;Acc:HGNC:28982]	0.921521	0.496781	0.891407		0.703046	0.496781	0.501009
ENSG00000134644	PUM1	pumilio RNA-binding family member 1 [Source:HGNC Symbol;Acc:HGNC:14957]	1.21855	0.657203	0.89075		0.937271	0.657203	0.512127
ENSG00000144747	TMF1	TATA element modulatory factor 1 [Source:HGNC Symbol;Acc:HGNC:11870]	1.65345	0.892618	0.88936		1.0647	0.892618	0.254326
ENSG00000137947	GTF2B	general transcription factor IIB [Source:HGNC Symbol;Acc:HGNC:4648]	1.12292	0.606212	0.889359		0.642269	0.606212	0.0833549
ENSG00000166979	EVA1C	eva-1 homolog C (C. elegans) [Source:HGNC Symbol;Acc:HGNC:13239]	2.38426	1.2888	0.887513		1.18213	1.2888	-0.12464
ENSG00000168243	GNG4	guanine nucleotide binding protein (G protein), gamma 4 [Source:HGNC Symbol;Acc:HGNC:4407]	1.80807	0.977351	0.887501		1.45553	0.977351	0.574598
ENSG00000144580	RQCD1	RCD1 required for cell differentiation1 homolog (S. pombe) [Source:HGNC Symbol;Acc:HGNC:10445]	0.991599	0.536122	0.887196		0.58533	0.536122	0.126689
ENSG00000128011	LRFN1	leucine rich repeat and fibronectin type III domain containing 1 [Source:HGNC Symbol;Acc:HGNC:29290]	1.35583	0.733442	0.88642		0.720572	0.733442	-0.0255413
ENSG00000198730	CTR9	CTR9 homolog, Paf1/RNA polymerase II complex component [Source:HGNC Symbol;Acc:HGNC:16850]	1.25341	0.678448	0.885544		0.736764	0.678448	0.118963
ENSG00000258947	TUBB3	tubulin, beta 3 class III [Source:HGNC Symbol;Acc:HGNC:20772]	0.921073	0.498753	0.884991		0.532667	0.498753	0.0949098
ENSG00000136522	MRPL47	mitochondrial ribosomal protein L47 [Source:HGNC Symbol;Acc:HGNC:16652]	1.30331	0.705769	0.884909		0.711891	0.705769	0.0124614
ENSG00000179918	SEPHS2	selenophosphate synthetase 2 [Source:HGNC Symbol;Acc:HGNC:19686]	0.733322	0.39726	0.884365		0.492899	0.39726	0.31121
ENSG00000122335	SERAC1	serine active site containing 1 [Source:HGNC Symbol;Acc:HGNC:21061]	1.44165	0.781292	0.883783		0.858969	0.781292	0.136743
ENSG00000135541	AHI1	Abelson helper integration site 1 [Source:HGNC Symbol;Acc:HGNC:21575]	1.95916	1.06229	0.88306		1.35525	1.06229	0.351381
ENSG00000103888	CEMIP	cell migration inducing protein, hyaluronan binding [Source:HGNC Symbol;Acc:HGNC:29213]	1.53078	0.83005	0.882997		0.662538	0.83005	-0.325196
ENSG00000164164	OTUD4	OTU deubiquitinase 4 [Source:HGNC Symbol;Acc:HGNC:24949]	1.59446	0.864637	0.882898		1.05038	0.864637	0.280746
ENSG00000117395	EBNA1BP2	EBNA1 binding protein 2 [Source:HGNC Symbol;Acc:HGNC:15531]	1.27716	0.693926	0.880091		0.626716	0.693926	-0.146968
ENSG00000176428	VPS37D	vacuolar protein sorting 37 homolog D (S. cerevisiae) [Source:HGNC Symbol;Acc:HGNC:18287]	1.56857	0.852891	0.87902		0.693865	0.852891	-0.297707
ENSG00000126464	PRR12	proline rich 12 [Source:HGNC Symbol;Acc:HGNC:29217]	0.77055	0.419064	0.878719		0.767241	0.419064	0.87251
ENSG00000182836	PLCXD3	phosphatidylinositol-specific phospholipase C, X domain containing 3 [Source:HGNC Symbol;Acc:HGNC:31822]	0.876151	0.476509	0.878676		0.797352	0.476509	0.742713
ENSG00000153933	DGKE	diacylglycerol kinase, epsilon 64kDa [Source:HGNC Symbol;Acc:HGNC:2852]	1.00211	0.545191	0.878202		0.565238	0.545191	0.0520983
ENSG00000137267	TUBB2A	tubulin, beta 2A class IIa [Source:HGNC Symbol;Acc:HGNC:12412]	1.27263	0.692544	0.877841		0.620806	0.692544	-0.157762
ENSG00000135144	DTX1	deltex 1, E3 ubiquitin ligase [Source:HGNC Symbol;Acc:HGNC:3060]	1.30556	0.710951	0.876843		0.609482	0.710951	-0.222167
ENSG00000174516	PELI3	pellino E3 ubiquitin protein ligase family member 3 [Source:HGNC Symbol;Acc:HGNC:30010]	1.15767	0.630581	0.876468		0.485787	0.630581	-0.376358
ENSG00000198265	HELZ	helicase with zinc finger [Source:HGNC Symbol;Acc:HGNC:16878]	1.32846	0.723881	0.875925		0.912625	0.723881	0.33427
ENSG00000103353	UBFD1	ubiquitin family domain containing 1 [Source:HGNC Symbol;Acc:HGNC:30565]	1.35547	0.738808	0.875518		1.01469	0.738808	0.457767
ENSG00000168495	POLR3D	polymerase (RNA) III (DNA directed) polypeptide D, 44kDa [Source:HGNC Symbol;Acc:HGNC:1080]	1.14966	0.627044	0.874566		0.635887	0.627044	0.0202033
ENSG00000135930	EIF4E2	eukaryotic translation initiation factor 4E family member 2 [Source:HGNC Symbol;Acc:HGNC:3293]	1.33315	0.727141	0.87453		0.740706	0.727141	0.026666
ENSG00000198727	MT-CYB	mitochondrially encoded cytochrome b [Source:HGNC Symbol;Acc:HGNC:7427]	1.24002	0.6766	0.873982		1.03157	0.6766	0.608469
ENSG00000062582	MRPS24	mitochondrial ribosomal protein S24 [Source:HGNC Symbol;Acc:HGNC:14510]	1.83297	1.00018	0.873916		0.790158	1.00018	-0.34005
ENSG00000185716	C16orf52	chromosome 16 open reading frame 52 [Source:HGNC Symbol;Acc:HGNC:27087]	1.52175	0.830536	0.873617		0.930873	0.830536	0.164541
ENSG00000115808	STRN	striatin, calmodulin binding protein [Source:HGNC Symbol;Acc:HGNC:11424]	1.49457	0.815786	0.87347		1.00275	0.815786	0.297694
ENSG00000119508	NR4A3	nuclear receptor subfamily 4, group A, member 3 [Source:HGNC Symbol;Acc:HGNC:7982]	18.0561	9.85874	0.87301		20.2394	9.85874	1.03769
ENSG00000198380	GFPT1	glutamine--fructose-6-phosphate transaminase 1 [Source:HGNC Symbol;Acc:HGNC:4241]	1.68396	0.92016	0.871898		1.02645	0.92016	0.157709
ENSG00000144597	EAF1	ELL associated factor 1 [Source:HGNC Symbol;Acc:HGNC:20907]	1.56181	0.853507	0.87174		1.03881	0.853507	0.283451
ENSG00000128266	GNAZ	guanine nucleotide binding protein (G protein), alpha z polypeptide [Source:HGNC Symbol;Acc:HGNC:4395]	1.54921	0.846678	0.871645		0.969051	0.846678	0.194759
ENSG00000169752	NRG4	neuregulin 4 [Source:HGNC Symbol;Acc:HGNC:29862]	0.844312	0.461513	0.871405		0.55906	0.461513	0.276631
ENSG00000205090	TMEM240	transmembrane protein 240 [Source:HGNC Symbol;Acc:HGNC:25186]	1.29772	0.709572	0.870959		0.677871	0.709572	-0.0659381
ENSG00000063169	GLTSCR1	glioma tumor suppressor candidate region gene 1 [Source:HGNC Symbol;Acc:HGNC:4332]	1.20289	0.657734	0.870928		0.836956	0.657734	0.347648
ENSG00000160785	SLC25A44	solute carrier family 25, member 44 [Source:HGNC Symbol;Acc:HGNC:29036]	1.61304	0.882466	0.870171		1.05612	0.882466	0.259167
ENSG00000163848	ZNF148	zinc finger protein 148 [Source:HGNC Symbol;Acc:HGNC:12933]	1.17033	0.640323	0.870039		0.81443	0.640323	0.346992
ENSG00000111596	CNOT2	CCR4-NOT transcription complex, subunit 2 [Source:HGNC Symbol;Acc:HGNC:7878]	1.57249	0.860362	0.870034		0.936218	0.860362	0.121901
ENSG00000101574	METTL4	methyltransferase like 4 [Source:HGNC Symbol;Acc:HGNC:24726]	1.0739	0.587596	0.869958		0.677103	0.587596	0.204551
ENSG00000171992	SYNPO	synaptopodin [Source:HGNC Symbol;Acc:HGNC:30672]	0.945066	0.517527	0.868781		0.476966	0.517527	-0.117747
ENSG00000168612	ZSWIM1	zinc finger, SWIM-type containing 1 [Source:HGNC Symbol;Acc:HGNC:16155]	0.566466	0.310272	0.868453		0.499428	0.310272	0.68674
ENSG00000175893	ZDHHC21	zinc finger, DHHC-type containing 21 [Source:HGNC Symbol;Acc:HGNC:20750]	1.07407	0.588603	0.867722		0.711909	0.588603	0.274398
ENSG00000173404	INSM1	insulinoma-associated 1 [Source:HGNC Symbol;Acc:HGNC:6090]	1.61279	0.884127	0.867234		1.34646	0.884127	0.606843
ENSG00000196968	FUT11	fucosyltransferase 11 (alpha (1,3) fucosyltransferase) [Source:HGNC Symbol;Acc:HGNC:19233]	1.7498	0.959448	0.866917		1.03826	0.959448	0.113884
ENSG00000176542	KIAA2018	KIAA2018 [Source:HGNC Symbol;Acc:HGNC:30494]	1.19402	0.655	0.866255		0.781437	0.655	0.254633
ENSG00000198786	MT-ND5	mitochondrially encoded NADH dehydrogenase 5 [Source:HGNC Symbol;Acc:HGNC:7461]	0.985265	0.540532	0.866133		1.22143	0.540532	1.17612
ENSG00000158691	ZSCAN12	zinc finger and SCAN domain containing 12 [Source:HGNC Symbol;Acc:HGNC:13172]	1.10792	0.607877	0.866008		0.586291	0.607877	-0.0521627
ENSG00000100142	POLR2F	polymerase (RNA) II (DNA directed) polypeptide F [Source:HGNC Symbol;Acc:HGNC:9193]	1.95058	1.07062	0.865451		0.943487	1.07062	-0.182378
ENSG00000136052	SLC41A2	solute carrier family 41 (magnesium transporter), member 2 [Source:HGNC Symbol;Acc:HGNC:31045]	1.14783	0.630287	0.864834		0.617456	0.630287	-0.0296723
ENSG00000072274	TFRC	transferrin receptor [Source:HGNC Symbol;Acc:HGNC:11763]	2.33347	1.28135	0.864816		1.36144	1.28135	0.0874775
ENSG00000129317	PUS7L	pseudouridylate synthase 7-like [Source:HGNC Symbol;Acc:HGNC:25276]	0.536282	0.294523	0.864611		0.267448	0.294523	-0.139125
ENSG00000141458	NPC1	Niemann-Pick disease, type C1 [Source:HGNC Symbol;Acc:HGNC:7897]	1.75273	0.96265	0.864518		0.915194	0.96265	-0.0729338
ENSG00000196453	ZNF777	zinc finger protein 777 [Source:HGNC Symbol;Acc:HGNC:22213]	0.840082	0.461431	0.864414		0.607238	0.461431	0.396146
ENSG00000152382	TADA1	transcriptional adaptor 1 [Source:HGNC Symbol;Acc:HGNC:30631]	0.882876	0.485107	0.863909		0.694308	0.485107	0.517274
ENSG00000117155	SSX2IP	synovial sarcoma, X breakpoint 2 interacting protein [Source:HGNC Symbol;Acc:HGNC:16509]	1.7727	0.974463	0.863271		0.982235	0.974463	0.0114609
ENSG00000119922	IFIT2	interferon-induced protein with tetratricopeptide repeats 2 [Source:HGNC Symbol;Acc:HGNC:5409]	1.41233	0.776737	0.862581		0.650607	0.776737	-0.255641
ENSG00000103126	AXIN1	axin 1 [Source:HGNC Symbol;Acc:HGNC:903]	2.15225	1.18384	0.86238		1.41395	1.18384	0.256259
ENSG00000198763	MT-ND2	mitochondrially encoded NADH dehydrogenase 2 [Source:HGNC Symbol;Acc:HGNC:7456]	1.17253	0.645045	0.862148		0.983827	0.645045	0.609004
ENSG00000110395	CBL	Cbl proto-oncogene, E3 ubiquitin protein ligase [Source:HGNC Symbol;Acc:HGNC:1541]	1.97896	1.08939	0.861217		0.987749	1.08939	-0.141311
ENSG00000153310	FAM49B	family with sequence similarity 49, member B [Source:HGNC Symbol;Acc:HGNC:25216]	1.26288	0.695269	0.861075		0.539313	0.695269	-0.366449
ENSG00000116604	MEF2D	myocyte enhancer factor 2D [Source:HGNC Symbol;Acc:HGNC:6997]	3.12316	1.7195	0.861016		2.58294	1.7195	0.587019
ENSG00000123095	BHLHE41	basic helix-loop-helix family, member e41 [Source:HGNC Symbol;Acc:HGNC:16617]	1.56034	0.859155	0.860871		1.35884	0.859155	0.66139
ENSG00000165868	HSPA12A	heat shock 70kDa protein 12A [Source:HGNC Symbol;Acc:HGNC:19022]	1.36939	0.754154	0.860605		0.726197	0.754154	-0.0544986
ENSG00000104164	BLOC1S6	biogenesis of lysosomal organelles complex-1, subunit 6, pallidin [Source:HGNC Symbol;Acc:HGNC:8549]	1.54299	0.84977	0.860585		0.821587	0.84977	-0.0486599
ENSG00000140157	NIPA2	non imprinted in Prader-Willi/Angelman syndrome 2 [Source:HGNC Symbol;Acc:HGNC:17044]	1.73932	0.958237	0.860072		0.934926	0.958237	-0.0355299
ENSG00000206053	HN1L	hematological and neurological expressed 1-like [Source:HGNC Symbol;Acc:HGNC:14137]	1.30973	0.721872	0.859452		0.561481	0.721872	-0.362508
ENSG00000151332	MBIP	MAP3K12 binding inhibitory protein 1 [Source:HGNC Symbol;Acc:HGNC:20427]	1.3146	0.724575	0.859415		0.662749	0.724575	-0.128674
ENSG00000144401	METTL21A	methyltransferase like 21A [Source:HGNC Symbol;Acc:HGNC:30476]	1.03208	0.568957	0.859169		0.498427	0.568957	-0.190938
ENSG00000197852	FAM212B	family with sequence similarity 212, member B [Source:HGNC Symbol;Acc:HGNC:28045]	1.44663	0.798042	0.858163		1.01422	0.798042	0.345839
ENSG00000165775	FUNDC2	FUN14 domain containing 2 [Source:HGNC Symbol;Acc:HGNC:24925]	1.71646	0.946904	0.858144		0.856798	0.946904	-0.144263
ENSG00000166974	MAPRE2	microtubule-associated protein, RP/EB family, member 2 [Source:HGNC Symbol;Acc:HGNC:6891]	1.91738	1.05782	0.858038		1.05497	1.05782	-0.0038982
ENSG00000167523	SPATA33	spermatogenesis associated 33 [Source:HGNC Symbol;Acc:HGNC:26463]	1.31958	0.728021	0.858032		0.610566	0.728021	-0.253832
ENSG00000077463	SIRT6	sirtuin 6 [Source:HGNC Symbol;Acc:HGNC:14934]	1.16861	0.644831	0.8578		0.550751	0.644831	-0.227521
ENSG00000197183	NOL4L	nucleolar protein 4-like [Source:HGNC Symbol;Acc:HGNC:16106]	1.29795	0.716257	0.857688		0.559886	0.716257	-0.355344
ENSG00000144847	IGSF11	immunoglobulin superfamily, member 11 [Source:HGNC Symbol;Acc:HGNC:16669]	1.63967	0.905123	0.857221		0.850563	0.905123	-0.0896971
ENSG00000070061	IKBKAP	inhibitor of kappa light polypeptide gene enhancer in B-cells, kinase complex-associated protein [Source:HGNC Symbol;Acc:HGNC:5959]	1.50461	0.830964	0.856531		0.755428	0.830964	-0.137491
ENSG00000120833	SOCS2	suppressor of cytokine signaling 2 [Source:HGNC Symbol;Acc:HGNC:19382]	1.26997	0.701409	0.856469		0.706241	0.701409	0.00990416
ENSG00000011021	CLCN6	chloride channel, voltage-sensitive 6 [Source:HGNC Symbol;Acc:HGNC:2024]	2.0219	1.11671	0.856463		1.3419	1.11671	0.265028
ENSG00000126603	GLIS2	GLIS family zinc finger 2 [Source:HGNC Symbol;Acc:HGNC:29450]	1.76954	0.977494	0.856216		0.845358	0.977494	-0.209527
ENSG00000186395	KRT10	keratin 10, type I [Source:HGNC Symbol;Acc:HGNC:6413]	1.32921	0.73437	0.85599		0.635145	0.73437	-0.209421
ENSG00000188807	TMEM201	transmembrane protein 201 [Source:HGNC Symbol;Acc:HGNC:33719]	1.32	0.729349	0.855857		0.691607	0.729349	-0.0766555
ENSG00000204175	GPRIN2	G protein regulated inducer of neurite outgrowth 2 [Source:HGNC Symbol;Acc:HGNC:23730]	0.646168	0.357081	0.85566		0.312343	0.357081	-0.193118
ENSG00000114554	PLXNA1	plexin A1 [Source:HGNC Symbol;Acc:HGNC:9099]	1.24352	0.687833	0.854294		0.678145	0.687833	-0.0204653
ENSG00000176386	CDC26	cell division cycle 26 [Source:HGNC Symbol;Acc:HGNC:17839]	0.964663	0.533833	0.853635		0.619419	0.533833	0.214526
ENSG00000184863	RBM33	RNA binding motif protein 33 [Source:HGNC Symbol;Acc:HGNC:27223]	1.91007	1.05744	0.853043		1.49759	1.05744	0.502067
ENSG00000162073	PAQR4	progestin and adipoQ receptor family member IV [Source:HGNC Symbol;Acc:HGNC:26386]	1.43149	0.792668	0.852729		0.632875	0.792668	-0.324795
ENSG00000197498	RPF2	ribosome production factor 2 homolog [Source:HGNC Symbol;Acc:HGNC:20870]	1.29985	0.719904	0.852465		0.455518	0.719904	-0.660297
ENSG00000154122	ANKH	ANKH inorganic pyrophosphate transport regulator [Source:HGNC Symbol;Acc:HGNC:15492]	1.328	0.735501	0.852451		0.70241	0.735501	-0.0664148
ENSG00000106524	ANKMY2	ankyrin repeat and MYND domain containing 2 [Source:HGNC Symbol;Acc:HGNC:25370]	1.12898	0.625451	0.852045		0.563907	0.625451	-0.149439
ENSG00000067064	IDI1	isopentenyl-diphosphate delta isomerase 1 [Source:HGNC Symbol;Acc:HGNC:5387]	3.23935	1.79466	0.85199		2.80815	1.79466	0.645908
ENSG00000141577	CEP131	centrosomal protein 131kDa [Source:HGNC Symbol;Acc:HGNC:29511]	1.19476	0.661921	0.851984		0.556501	0.661921	-0.250276
ENSG00000120784	ZFP30	ZFP30 zinc finger protein [Source:HGNC Symbol;Acc:HGNC:29555]	1.01582	0.56291	0.851663		0.722087	0.56291	0.359268
ENSG00000173744	AGFG1	ArfGAP with FG repeats 1 [Source:HGNC Symbol;Acc:HGNC:5175]	1.51015	0.837041	0.851318		0.703578	0.837041	-0.250589
ENSG00000091651	ORC6	origin recognition complex, subunit 6 [Source:HGNC Symbol;Acc:HGNC:17151]	0.948422	0.525902	0.850735		0.637358	0.525902	0.27731
ENSG00000100522	GNPNAT1	glucosamine-phosphate N-acetyltransferase 1 [Source:HGNC Symbol;Acc:HGNC:19980]	1.29646	0.718956	0.850603		0.449461	0.718956	-0.677707
ENSG00000104313	EYA1	EYA transcriptional coactivator and phosphatase 1 [Source:HGNC Symbol;Acc:HGNC:3519]	2.59117	1.43837	0.849167		1.2108	1.43837	-0.248473
ENSG00000031003	FAM13B	family with sequence similarity 13, member B [Source:HGNC Symbol;Acc:HGNC:1335]	1.48494	0.824465	0.84887		1.16017	0.824465	0.492811
ENSG00000143845	ETNK2	ethanolamine kinase 2 [Source:HGNC Symbol;Acc:HGNC:25575]	1.37183	0.762295	0.847685		0.495563	0.762295	-0.621282
ENSG00000184232	OAF	out at first homolog [Source:HGNC Symbol;Acc:HGNC:28752]	1.02578	0.570059	0.847541		0.855858	0.570059	0.586261
ENSG00000173825	TIGD3	tigger transposable element derived 3 [Source:HGNC Symbol;Acc:HGNC:18334]	0.69014	0.383738	0.846767		0.365732	0.383738	-0.069336
ENSG00000144369	FAM171B	family with sequence similarity 171, member B [Source:HGNC Symbol;Acc:HGNC:29412]	1.87678	1.04374	0.846493		1.35464	1.04374	0.376138
ENSG00000230590	FTX	FTX transcript, XIST regulator (non-protein coding) [Source:HGNC Symbol;Acc:HGNC:37190]	1.22071	0.679008	0.846221		0.940589	0.679008	0.470136
ENSG00000105514	RAB3D	RAB3D, member RAS oncogene family [Source:HGNC Symbol;Acc:HGNC:9779]	1.41042	0.784734	0.845853		0.524335	0.784734	-0.581715
ENSG00000204160	ZDHHC18	zinc finger, DHHC-type containing 18 [Source:HGNC Symbol;Acc:HGNC:20712]	1.69315	0.942081	0.845791		0.936917	0.942081	-0.00792893
ENSG00000083097	DOPEY1	dopey family member 1 [Source:HGNC Symbol;Acc:HGNC:21194]	1.11158	0.619112	0.844337		0.778401	0.619112	0.330312
ENSG00000113615	SEC24A	SEC24 family member A [Source:HGNC Symbol;Acc:HGNC:10703]	1.64909	0.918726	0.843966		0.948681	0.918726	0.0462879
ENSG00000162728	KCNJ9	potassium channel, inwardly rectifying subfamily J, member 9 [Source:HGNC Symbol;Acc:HGNC:6270]	1.35805	0.75702	0.843137		0.497214	0.75702	-0.606465
ENSG00000147799	ARHGAP39	Rho GTPase activating protein 39 [Source:HGNC Symbol;Acc:HGNC:29351]	1.54843	0.863299	0.842878		0.791481	0.863299	-0.125305
ENSG00000160075	SSU72	SSU72 RNA polymerase II CTD phosphatase homolog (S. cerevisiae) [Source:HGNC Symbol;Acc:HGNC:25016]	1.71036	0.953681	0.842725		0.738573	0.953681	-0.368766
ENSG00000131389	SLC6A6	solute carrier family 6 (neurotransmitter transporter), member 6 [Source:HGNC Symbol;Acc:HGNC:11052]	1.9262	1.07427	0.842396		1.49117	1.07427	0.473083
ENSG00000228300	C19orf24	chromosome 19 open reading frame 24 [Source:HGNC Symbol;Acc:HGNC:26073]	1.29767	0.723831	0.842204		0.557736	0.723831	-0.376071
ENSG00000181222	POLR2A	polymerase (RNA) II (DNA directed) polypeptide A, 220kDa [Source:HGNC Symbol;Acc:HGNC:9187]	1.31196	0.732093	0.841628		0.731879	0.732093	-0.000421978
ENSG00000188229	TUBB4B	tubulin, beta 4B class IVb [Source:HGNC Symbol;Acc:HGNC:20771]	1.17129	0.653653	0.8415		0.547806	0.653653	-0.254859
ENSG00000121741	ZMYM2	zinc finger, MYM-type 2 [Source:HGNC Symbol;Acc:HGNC:12989]	1.32232	0.738293	0.840806		0.847701	0.738293	0.199362
ENSG00000073150	PANX2	pannexin 2 [Source:HGNC Symbol;Acc:HGNC:8600]	1.92013	1.07214	0.840709		0.867011	1.07214	-0.306369
ENSG00000168081	PNOC	prepronociceptin [Source:HGNC Symbol;Acc:HGNC:9163]	1.91582	1.06984	0.840567		2.13478	1.06984	0.996694
ENSG00000091844	RGS17	regulator of G-protein signaling 17 [Source:HGNC Symbol;Acc:HGNC:14088]	1.19395	0.666744	0.840544		0.870775	0.666744	0.385168
ENSG00000176946	THAP4	THAP domain containing 4 [Source:HGNC Symbol;Acc:HGNC:23187]	1.3251	0.739991	0.84052		0.712447	0.739991	-0.0547259
ENSG00000134375	TIMM17A	translocase of inner mitochondrial membrane 17 homolog A (yeast) [Source:HGNC Symbol;Acc:HGNC:17315]	1.25802	0.702647	0.840285		0.823187	0.702647	0.22842
ENSG00000141522	ARHGDIA	Rho GDP dissociation inhibitor (GDI) alpha [Source:HGNC Symbol;Acc:HGNC:678]	1.72443	0.963246	0.840146		0.83378	0.963246	-0.208238
ENSG00000100523	DDHD1	DDHD domain containing 1 [Source:HGNC Symbol;Acc:HGNC:19714]	1.48808	0.831371	0.839885		1.04586	0.831371	0.331127
ENSG00000082213	C5orf22	chromosome 5 open reading frame 22 [Source:HGNC Symbol;Acc:HGNC:25639]	0.826962	0.46203	0.839835		0.489037	0.46203	0.0819581
ENSG00000174233	ADCY6	adenylate cyclase 6 [Source:HGNC Symbol;Acc:HGNC:237]	1.43547	0.802025	0.8398		0.821397	0.802025	0.0344315
ENSG00000138660	AP1AR	adaptor-related protein complex 1 associated regulatory protein [Source:HGNC Symbol;Acc:HGNC:28808]	1.66056	0.927857	0.839697		0.837792	0.927857	-0.14731
ENSG00000154822	PLCL2	phospholipase C-like 2 [Source:HGNC Symbol;Acc:HGNC:9064]	1.45158	0.811331	0.839262		1.05643	0.811331	0.380841
ENSG00000182512	GLRX5	glutaredoxin 5 [Source:HGNC Symbol;Acc:HGNC:20134]	1.7258	0.96462	0.839229		0.773597	0.96462	-0.31838
ENSG00000117385	P3H1	prolyl 3-hydroxylase 1 [Source:HGNC Symbol;Acc:HGNC:19316]	1.44085	0.805475	0.839007		1.01817	0.805475	0.338071
ENSG00000104833	TUBB4A	tubulin, beta 4A class IVa [Source:HGNC Symbol;Acc:HGNC:20774]	0.795994	0.445106	0.838609		0.424697	0.445106	-0.067716
ENSG00000135127	CCDC64	coiled-coil domain containing 64 [Source:HGNC Symbol;Acc:HGNC:28095]	1.75532	0.981625	0.838489		1.16301	0.981625	0.244619
ENSG00000153012	LGI2	leucine-rich repeat LGI family, member 2 [Source:HGNC Symbol;Acc:HGNC:18710]	1.56213	0.873658	0.838375		1.17648	0.873658	0.429334
ENSG00000204291	COL15A1	collagen, type XV, alpha 1 [Source:HGNC Symbol;Acc:HGNC:2192]	0.518502	0.290024	0.838176		0.362644	0.290024	0.32238
ENSG00000139289	PHLDA1	pleckstrin homology-like domain, family A, member 1 [Source:HGNC Symbol;Acc:HGNC:8933]	2.24463	1.25612	0.837503		1.42101	1.25612	0.177935
ENSG00000174145	NWD2	NACHT and WD repeat domain containing 2 [Source:HGNC Symbol;Acc:HGNC:29229]	0.70429	0.394239	0.837098		0.421949	0.394239	0.097998
ENSG00000148399	DPH7	diphthamide biosynthesis 7 [Source:HGNC Symbol;Acc:HGNC:25199]	0.852733	0.477501	0.836591		0.524265	0.477501	0.134794
ENSG00000240857	RDH14	retinol dehydrogenase 14 (all-trans/9-cis/11-cis) [Source:HGNC Symbol;Acc:HGNC:19979]	1.05623	0.591635	0.836148		0.529113	0.591635	-0.161132
ENSG00000111364	DDX55	DEAD (Asp-Glu-Ala-Asp) box polypeptide 55 [Source:HGNC Symbol;Acc:HGNC:20085]	0.755798	0.423546	0.835482		0.49694	0.423546	0.230554
ENSG00000205302	SNX2	sorting nexin 2 [Source:HGNC Symbol;Acc:HGNC:11173]	1.22384	0.68585	0.835453		0.664943	0.68585	-0.0446615
ENSG00000099821	POLRMT	polymerase (RNA) mitochondrial (DNA directed) [Source:HGNC Symbol;Acc:HGNC:9200]	0.863258	0.483966	0.834885		0.601889	0.483966	0.314591
ENSG00000146282	RARS2	arginyl-tRNA synthetase 2, mitochondrial [Source:HGNC Symbol;Acc:HGNC:21406]	0.913967	0.512788	0.833778		0.513352	0.512788	0.00158516
ENSG00000104980	TIMM44	translocase of inner mitochondrial membrane 44 homolog (yeast) [Source:HGNC Symbol;Acc:HGNC:17316]	1.45067	0.81394	0.833728		0.968935	0.81394	0.251477
ENSG00000175264	CHST1	carbohydrate (keratan sulfate Gal-6) sulfotransferase 1 [Source:HGNC Symbol;Acc:HGNC:1969]	1.16068	0.651276	0.833627		0.525783	0.651276	-0.308801
ENSG00000147852	VLDLR	very low density lipoprotein receptor [Source:HGNC Symbol;Acc:HGNC:12698]	1.36896	0.768518	0.832931		1.3787	0.768518	0.843159
ENSG00000142611	PRDM16	PR domain containing 16 [Source:HGNC Symbol;Acc:HGNC:14000]	1.16783	0.656118	0.831807		0.957321	0.656118	0.545046
ENSG00000184949	FAM227A	family with sequence similarity 227, member A [Source:HGNC Symbol;Acc:HGNC:44197]	0.760889	0.427532	0.831654		0.61204	0.427532	0.517592
ENSG00000122882	ECD	ecdysoneless homolog (Drosophila) [Source:HGNC Symbol;Acc:HGNC:17029]	1.40527	0.789821	0.831246		0.700669	0.789821	-0.172792
ENSG00000188158	NHS	Nance-Horan syndrome (congenital cataracts and dental anomalies) [Source:HGNC Symbol;Acc:HGNC:7820]	1.23216	0.692549	0.831195		1.17806	0.692549	0.766429
ENSG00000163673	DCLK3	doublecortin-like kinase 3 [Source:HGNC Symbol;Acc:HGNC:19005]	0.721431	0.405562	0.830939		0.335261	0.405562	-0.27464
ENSG00000159147	DONSON	downstream neighbor of SON [Source:HGNC Symbol;Acc:HGNC:2993]	1.42391	0.800574	0.830756		0.763483	0.800574	-0.0684386
ENSG00000100335	MIEF1	mitochondrial elongation factor 1 [Source:HGNC Symbol;Acc:HGNC:25979]	0.920584	0.517993	0.829618		0.621479	0.517993	0.262773
ENSG00000130340	SNX9	sorting nexin 9 [Source:HGNC Symbol;Acc:HGNC:14973]	1.75741	0.989411	0.828806		1.08886	0.989411	0.138171
ENSG00000088992	TESC	tescalcin [Source:HGNC Symbol;Acc:HGNC:26065]	1.74375	0.981776	0.828727		1.15331	0.981776	0.232314
ENSG00000175040	CHST2	carbohydrate (N-acetylglucosamine-6-O) sulfotransferase 2 [Source:HGNC Symbol;Acc:HGNC:1970]	1.66691	0.938687	0.828464		1.08032	0.938687	0.202737
ENSG00000010310	GIPR	gastric inhibitory polypeptide receptor [Source:HGNC Symbol;Acc:HGNC:4271]	1.51532	0.853527	0.828118		0.834644	0.853527	-0.0322754
ENSG00000143799	PARP1	poly (ADP-ribose) polymerase 1 [Source:HGNC Symbol;Acc:HGNC:270]	1.13632	0.640228	0.827713		0.670589	0.640228	0.0668418
ENSG00000173465	SSSCA1	Sjogren syndrome/scleroderma autoantigen 1 [Source:HGNC Symbol;Acc:HGNC:11328]	1.38396	0.779866	0.827501		0.890469	0.779866	0.191339
ENSG00000090447	TFAP4	transcription factor AP-4 (activating enhancer binding protein 4) [Source:HGNC Symbol;Acc:HGNC:11745]	0.781616	0.440475	0.827401		0.347152	0.440475	-0.343493
ENSG00000138709	LARP1B	La ribonucleoprotein domain family, member 1B [Source:HGNC Symbol;Acc:HGNC:24704]	2.26156	1.27497	0.826854		1.17308	1.27497	-0.120164
ENSG00000197296	FITM2	fat storage-inducing transmembrane protein 2 [Source:HGNC Symbol;Acc:HGNC:16135]	1.44094	0.81239	0.826764		0.76892	0.81239	-0.0793392
ENSG00000142686	C1orf216	chromosome 1 open reading frame 216 [Source:HGNC Symbol;Acc:HGNC:26800]	1.35562	0.764383	0.826587		0.685304	0.764383	-0.157552
ENSG00000065833	ME1	malic enzyme 1, NADP(+)-dependent, cytosolic [Source:HGNC Symbol;Acc:HGNC:6983]	2.20066	1.24088	0.826575		1.14712	1.24088	-0.113353
ENSG00000166483	WEE1	WEE1 G2 checkpoint kinase [Source:HGNC Symbol;Acc:HGNC:12761]	1.82883	1.03154	0.826126		0.904104	1.03154	-0.190237
ENSG00000150961	SEC24D	SEC24 family member D [Source:HGNC Symbol;Acc:HGNC:10706]	3.01269	1.69938	0.826048		1.09756	1.69938	-0.630708
ENSG00000123689	G0S2	G0/G1 switch 2 [Source:HGNC Symbol;Acc:HGNC:30229]	0.694307	0.39176	0.825604		0.885342	0.39176	1.17626
ENSG00000140943	MBTPS1	membrane-bound transcription factor peptidase, site 1 [Source:HGNC Symbol;Acc:HGNC:15456]	0.895814	0.505465	0.825586		0.636146	0.505465	0.331745
ENSG00000084070	SMAP2	small ArfGAP2 [Source:HGNC Symbol;Acc:HGNC:25082]	1.99682	1.12698	0.825236		0.955572	1.12698	-0.238031
ENSG00000092964	DPYSL2	dihydropyrimidinase-like 2 [Source:HGNC Symbol;Acc:HGNC:3014]	0.981288	0.554019	0.824741		1.02448	0.554019	0.886882
ENSG00000162623	TYW3	tRNA-yW synthesizing protein 3 homolog (S. cerevisiae) [Source:HGNC Symbol;Acc:HGNC:24757]	0.65398	0.369322	0.824366		0.501455	0.369322	0.441241
ENSG00000214960	ISPD	isoprenoid synthase domain containing [Source:HGNC Symbol;Acc:HGNC:37276]	1.20383	0.680007	0.824006		0.885602	0.680007	0.381108
ENSG00000160271	RALGDS	ral guanine nucleotide dissociation stimulator [Source:HGNC Symbol;Acc:HGNC:9842]	1.11434	0.629475	0.823974		0.525544	0.629475	-0.260337
ENSG00000100503	NIN	ninein (GSK3B interacting protein) [Source:HGNC Symbol;Acc:HGNC:14906]	1.67136	0.944424	0.823517		1.02803	0.944424	0.122379
ENSG00000131148	EMC8	ER membrane protein complex subunit 8 [Source:HGNC Symbol;Acc:HGNC:7864]	1.55489	0.878739	0.823303		0.796599	0.878739	-0.141582
ENSG00000165630	PRPF18	pre-mRNA processing factor 18 [Source:HGNC Symbol;Acc:HGNC:17351]	1.36879	0.773971	0.822548		0.746213	0.773971	-0.052692
ENSG00000182173	TSEN54	TSEN54 tRNA splicing endonuclease subunit [Source:HGNC Symbol;Acc:HGNC:27561]	1.07381	0.607372	0.822085		0.74899	0.607372	0.302367
ENSG00000102753	KPNA3	karyopherin alpha 3 (importin alpha 4) [Source:HGNC Symbol;Acc:HGNC:6396]	1.30984	0.740964	0.821917		0.822553	0.740964	0.150705
ENSG00000149480	MTA2	metastasis associated 1 family, member 2 [Source:HGNC Symbol;Acc:HGNC:7411]	1.26227	0.714329	0.82136		0.811735	0.714329	0.184421
ENSG00000103257	SLC7A5	solute carrier family 7 (amino acid transporter light chain, L system), member 5 [Source:HGNC Symbol;Acc:HGNC:11063]	3.50766	1.98504	0.821342		2.76714	1.98504	0.479231
ENSG00000122068	FYTTD1	forty-two-three domain containing 1 [Source:HGNC Symbol;Acc:HGNC:25407]	1.80009	1.01883	0.82115		1.15759	1.01883	0.184206
ENSG00000087338	GMCL1	germ cell-less, spermatogenesis associated 1 [Source:HGNC Symbol;Acc:HGNC:23843]	1.11193	0.629458	0.820882		0.635987	0.629458	0.0148856
ENSG00000151726	ACSL1	acyl-CoA synthetase long-chain family member 1 [Source:HGNC Symbol;Acc:HGNC:3569]	1.17535	0.665697	0.820152		0.719055	0.665697	0.111236
ENSG00000180008	SOCS4	suppressor of cytokine signaling 4 [Source:HGNC Symbol;Acc:HGNC:19392]	2.45279	1.39075	0.818559		1.1874	1.39075	-0.228052
ENSG00000181234	TMEM132C	transmembrane protein 132C [Source:HGNC Symbol;Acc:HGNC:25436]	0.838369	0.475439	0.818326		0.761384	0.475439	0.679364
ENSG00000172766	NAA16	N(alpha)-acetyltransferase 16, NatA auxiliary subunit [Source:HGNC Symbol;Acc:HGNC:26164]	1.34514	0.763068	0.817874		0.782973	0.763068	0.0371498
ENSG00000101265	RASSF2	Ras association (RalGDS/AF-6) domain family member 2 [Source:HGNC Symbol;Acc:HGNC:9883]	1.21751	0.690684	0.817832		0.628865	0.690684	-0.135276
ENSG00000109534	GAR1	GAR1 homolog, ribonucleoprotein [Source:HGNC Symbol;Acc:HGNC:14264]	1.27456	0.723645	0.816649		0.664459	0.723645	-0.123102
ENSG00000162769	FLVCR1	feline leukemia virus subgroup C cellular receptor 1 [Source:HGNC Symbol;Acc:HGNC:24682]	2.56785	1.45808	0.816487		1.53921	1.45808	0.07812
ENSG00000143319	ISG20L2	interferon stimulated exonuclease gene 20kDa-like 2 [Source:HGNC Symbol;Acc:HGNC:25745]	1.85342	1.05244	0.816457		0.875426	1.05244	-0.265675
ENSG00000107819	SFXN3	sideroflexin 3 [Source:HGNC Symbol;Acc:HGNC:16087]	1.90466	1.08201	0.815822		1.32889	1.08201	0.296513
ENSG00000050393	MCUR1	mitochondrial calcium uniporter regulator 1 [Source:HGNC Symbol;Acc:HGNC:21097]	1.44105	0.818883	0.815396		0.894744	0.818883	0.127818
ENSG00000110987	BCL7A	B-cell CLL/lymphoma 7A [Source:HGNC Symbol;Acc:HGNC:1004]	0.849515	0.482857	0.815045		0.533568	0.482857	0.144075
ENSG00000139211	AMIGO2	adhesion molecule with Ig-like domain 2 [Source:HGNC Symbol;Acc:HGNC:24073]	1.06497	0.60536	0.814945		0.805257	0.60536	0.411655
ENSG00000113282	CLINT1	clathrin interactor 1 [Source:HGNC Symbol;Acc:HGNC:23186]	1.26197	0.717427	0.814778		1.02909	0.717427	0.520468
ENSG00000175928	LRRN1	leucine rich repeat neuronal 1 [Source:HGNC Symbol;Acc:HGNC:20980]	1.0529	0.598813	0.814196		0.740812	0.598813	0.307002
ENSG00000106546	AHR	aryl hydrocarbon receptor [Source:HGNC Symbol;Acc:HGNC:348]	1.62441	0.92412	0.81376		0.799718	0.92412	-0.208588
ENSG00000066629	EML1	echinoderm microtubule associated protein like 1 [Source:HGNC Symbol;Acc:HGNC:3330]	1.17846	0.670436	0.813735		0.499744	0.670436	-0.423912
ENSG00000099822	HCN2	hyperpolarization activated cyclic nucleotide gated potassium channel 2 [Source:HGNC Symbol;Acc:HGNC:4846]	1.51781	0.863708	0.813372		0.780943	0.863708	-0.145327
ENSG00000185009	AP3M1	adaptor-related protein complex 3, mu 1 subunit [Source:HGNC Symbol;Acc:HGNC:569]	1.20616	0.68647	0.813156		0.664304	0.68647	-0.047354
ENSG00000145414	NAF1	nuclear assembly factor 1 ribonucleoprotein [Source:HGNC Symbol;Acc:HGNC:25126]	3.16643	1.80234	0.812985		1.55328	1.80234	-0.214558
ENSG00000175866	BAIAP2	BAI1-associated protein 2 [Source:HGNC Symbol;Acc:HGNC:947]	3.27232	1.86325	0.812495		4.10536	1.86325	1.13969
ENSG00000172115	CYCS	cytochrome c, somatic [Source:HGNC Symbol;Acc:HGNC:19986]	1.98857	1.1326	0.812091		1.11524	1.1326	-0.0222865
ENSG00000088247	KHSRP	KH-type splicing regulatory protein [Source:HGNC Symbol;Acc:HGNC:6316]	1.48894	0.848568	0.811183		1.19024	0.848568	0.48815
ENSG00000183891	TTC32	tetratricopeptide repeat domain 32 [Source:HGNC Symbol;Acc:HGNC:32954]	0.957927	0.545941	0.811171		0.661424	0.545941	0.276831
ENSG00000103653	CSK	c-src tyrosine kinase [Source:HGNC Symbol;Acc:HGNC:2444]	1.22772	0.699789	0.810991		0.680821	0.699789	-0.0396447
ENSG00000166260	COX11	COX11 cytochrome c oxidase copper chaperone [Source:HGNC Symbol;Acc:HGNC:2261]	1.04262	0.594402	0.810707		0.767471	0.594402	0.368673
ENSG00000103326	CAPN15	calpain 15 [Source:HGNC Symbol;Acc:HGNC:11182]	1.27942	0.729815	0.809885		0.766272	0.729815	0.0703248
ENSG00000180694	TMEM64	transmembrane protein 64 [Source:HGNC Symbol;Acc:HGNC:25441]	1.67438	0.955428	0.809408		1.09475	0.955428	0.196387
ENSG00000204120	GIGYF2	GRB10 interacting GYF protein 2 [Source:HGNC Symbol;Acc:HGNC:11960]	0.673221	0.384644	0.807557		0.638524	0.384644	0.731218
ENSG00000177666	PNPLA2	patatin-like phospholipase domain containing 2 [Source:HGNC Symbol;Acc:HGNC:30802]	1.40701	0.803953	0.807446		0.895935	0.803953	0.156284
ENSG00000177189	RPS6KA3	ribosomal protein S6 kinase, 90kDa, polypeptide 3 [Source:HGNC Symbol;Acc:HGNC:10432]	1.99278	1.1391	0.80689		1.15709	1.1391	0.0226105
ENSG00000175581	MRPL48	mitochondrial ribosomal protein L48 [Source:HGNC Symbol;Acc:HGNC:16653]	1.66529	0.951933	0.806841		0.872069	0.951933	-0.126417
ENSG00000108588	CCDC47	coiled-coil domain containing 47 [Source:HGNC Symbol;Acc:HGNC:24856]	1.71662	0.981331	0.806756		1.07288	0.981331	0.128672
ENSG00000138413	IDH1	isocitrate dehydrogenase 1 (NADP+), soluble [Source:HGNC Symbol;Acc:HGNC:5382]	1.5229	0.87101	0.806062		0.92209	0.87101	0.0822192
ENSG00000126062	TMEM115	transmembrane protein 115 [Source:HGNC Symbol;Acc:HGNC:30055]	1.13011	0.646478	0.805795		0.839716	0.646478	0.3773
ENSG00000170903	MSANTD4	Myb/SANT-like DNA-binding domain containing 4 with coiled-coils [Source:HGNC Symbol;Acc:HGNC:29383]	0.991818	0.567367	0.805793		0.570356	0.567367	0.0075799
ENSG00000163053	SLC16A14	solute carrier family 16, member 14 [Source:HGNC Symbol;Acc:HGNC:26417]	0.835346	0.477954	0.805502		0.565895	0.477954	0.243664
ENSG00000179152	TCAIM	T cell activation inhibitor, mitochondrial [Source:HGNC Symbol;Acc:HGNC:25241]	0.769925	0.440597	0.80526		0.424412	0.440597	-0.0539922
ENSG00000071246	VASH1	vasohibin 1 [Source:HGNC Symbol;Acc:HGNC:19964]	1.05547	0.604063	0.805114		0.758074	0.604063	0.327639
ENSG00000138166	DUSP5	dual specificity phosphatase 5 [Source:HGNC Symbol;Acc:HGNC:3071]	13.8318	7.91646	0.805057		9.72305	7.91646	0.296552
ENSG00000104756	KCTD9	potassium channel tetramerization domain containing 9 [Source:HGNC Symbol;Acc:HGNC:22401]	2.1006	1.20234	0.80496		0.998086	1.20234	-0.268603
ENSG00000082458	DLG3	discs, large homolog 3 (Drosophila) [Source:HGNC Symbol;Acc:HGNC:2902]	1.10292	0.63141	0.804677		0.676311	0.63141	0.0991093
ENSG00000135318	NT5E	5'-nucleotidase, ecto (CD73) [Source:HGNC Symbol;Acc:HGNC:8021]	1.66289	0.952229	0.804316		1.05901	0.952229	0.153338
ENSG00000137968	SLC44A5	solute carrier family 44, member 5 [Source:HGNC Symbol;Acc:HGNC:28524]	1.00687	0.576616	0.804191		0.565315	0.576616	-0.0285562
ENSG00000108829	LRRC59	leucine rich repeat containing 59 [Source:HGNC Symbol;Acc:HGNC:28817]	1.78188	1.02125	0.803058		1.00689	1.02125	-0.0204304
ENSG00000103365	GGA2	golgi-associated, gamma adaptin ear containing, ARF binding protein 2 [Source:HGNC Symbol;Acc:HGNC:16064]	1.64247	0.942235	0.801713		1.00793	0.942235	0.0972372
ENSG00000184900	SUMO3	small ubiquitin-like modifier 3 [Source:HGNC Symbol;Acc:HGNC:11124]	1.36129	0.781131	0.801338		0.718884	0.781131	-0.119805
ENSG00000047662	FAM184B	family with sequence similarity 184, member B [Source:HGNC Symbol;Acc:HGNC:29235]	0.727458	0.417631	0.800635		0.711043	0.417631	0.767708
ENSG00000158545	ZC3H18	zinc finger CCCH-type containing 18 [Source:HGNC Symbol;Acc:HGNC:25091]	1.33856	0.768628	0.800324		0.966564	0.768628	0.330579
ENSG00000168917	SLC35G2	solute carrier family 35, member G2 [Source:HGNC Symbol;Acc:HGNC:28480]	1.56916	0.901178	0.800109		0.802152	0.901178	-0.167936
ENSG00000112149	CD83	CD83 molecule [Source:HGNC Symbol;Acc:HGNC:1703]	1.52935	0.878336	0.800072		1.04208	0.878336	0.246623
ENSG00000172954	LCLAT1	lysocardiolipin acyltransferase 1 [Source:HGNC Symbol;Acc:HGNC:26756]	1.31005	0.753165	0.79858		1.32096	0.753165	0.810547
ENSG00000112182	BACH2	BTB and CNC homology 1, basic leucine zipper transcription factor 2 [Source:HGNC Symbol;Acc:HGNC:14078]	3.5292	2.02941	0.798278		1.61793	2.02941	-0.326913
ENSG00000166484	MAPK7	mitogen-activated protein kinase 7 [Source:HGNC Symbol;Acc:HGNC:6880]	0.88647	0.509766	0.798236		0.636056	0.509766	0.319317
ENSG00000105516	DBP	D site of albumin promoter (albumin D-box) binding protein [Source:HGNC Symbol;Acc:HGNC:2697]	0.967478	0.556362	0.798204		0.795491	0.556362	0.515822
ENSG00000025800	KPNA6	karyopherin alpha 6 (importin alpha 7) [Source:HGNC Symbol;Acc:HGNC:6399]	1.362	0.783307	0.798075		0.908909	0.783307	0.214558
ENSG00000117616	RSRP1	arginine/serine-rich protein 1 [Source:HGNC Symbol;Acc:HGNC:25234]	1.70378	0.979894	0.798045		1.44404	0.979894	0.559409
ENSG00000124380	SNRNP27	small nuclear ribonucleoprotein 27kDa (U4/U6.U5) [Source:HGNC Symbol;Acc:HGNC:30240]	1.56486	0.90004	0.797971		0.637596	0.90004	-0.497347
ENSG00000148248	SURF4	surfeit 4 [Source:HGNC Symbol;Acc:HGNC:11476]	1.70586	0.981139	0.797969		1.04092	0.981139	0.085331
ENSG00000127125	PPCS	phosphopantothenoylcysteine synthetase [Source:HGNC Symbol;Acc:HGNC:25686]	0.669437	0.385116	0.797656		0.324274	0.385116	-0.248079
ENSG00000163811	WDR43	WD repeat domain 43 [Source:HGNC Symbol;Acc:HGNC:28945]	1.34525	0.77438	0.796756		0.91003	0.77438	0.232872
ENSG00000132906	CASP9	caspase 9, apoptosis-related cysteine peptidase [Source:HGNC Symbol;Acc:HGNC:1511]	1.15682	0.665926	0.796728		0.555419	0.665926	-0.261785
ENSG00000196924	FLNA	filamin A, alpha [Source:HGNC Symbol;Acc:HGNC:3754]	1.54816	0.891715	0.795903		0.958067	0.891715	0.103544
ENSG00000140320	BAHD1	bromo adjacent homology domain containing 1 [Source:HGNC Symbol;Acc:HGNC:29153]	2.31666	1.33486	0.795361		1.36305	1.33486	0.030155
ENSG00000109118	PHF12	PHD finger protein 12 [Source:HGNC Symbol;Acc:HGNC:20816]	1.15308	0.664442	0.795274		0.894067	0.664442	0.428239
ENSG00000147676	MAL2	mal, T-cell differentiation protein 2 (gene/pseudogene) [Source:HGNC Symbol;Acc:HGNC:13634]	1.25143	0.721347	0.794809		0.675458	0.721347	-0.094828
ENSG00000174227	PIGG	phosphatidylinositol glycan anchor biosynthesis, class G [Source:HGNC Symbol;Acc:HGNC:25985]	0.961818	0.554769	0.793878		0.414524	0.554769	-0.420432
ENSG00000106105	GARS	glycyl-tRNA synthetase [Source:HGNC Symbol;Acc:HGNC:4162]	2.01541	1.16262	0.793689		1.54206	1.16262	0.407474
ENSG00000116191	RALGPS2	Ral GEF with PH domain and SH3 binding motif 2 [Source:HGNC Symbol;Acc:HGNC:30279]	1.3884	0.80105	0.793458		0.654477	0.80105	-0.291551
ENSG00000136816	TOR1B	torsin family 1, member B (torsin B) [Source:HGNC Symbol;Acc:HGNC:11995]	1.37122	0.791232	0.79329		0.855318	0.791232	0.112361
ENSG00000134070	IRAK2	interleukin-1 receptor-associated kinase 2 [Source:HGNC Symbol;Acc:HGNC:6113]	1.07858	0.622647	0.792643		0.796093	0.622647	0.354522
ENSG00000145390	USP53	ubiquitin specific peptidase 53 [Source:HGNC Symbol;Acc:HGNC:29255]	2.08397	1.20312	0.79256		1.12498	1.20312	-0.0968782
ENSG00000090020	SLC9A1	solute carrier family 9, subfamily A (NHE1, cation proton antiporter 1), member 1 [Source:HGNC Symbol;Acc:HGNC:11071]	1.17245	0.677055	0.792185		0.786118	0.677055	0.215473
ENSG00000197479	PCDHB11	protocadherin beta 11 [Source:HGNC Symbol;Acc:HGNC:8682]	1.37163	0.792135	0.792074		1.01071	0.792135	0.351547
ENSG00000198742	SMURF1	SMAD specific E3 ubiquitin protein ligase 1 [Source:HGNC Symbol;Acc:HGNC:16807]	1.61327	0.93173	0.792008		0.885122	0.93173	-0.0740351
ENSG00000171823	FBXL14	F-box and leucine-rich repeat protein 14 [Source:HGNC Symbol;Acc:HGNC:28624]	1.17366	0.677983	0.791699		1.046	0.677983	0.625567
ENSG00000112031	MTRF1L	mitochondrial translational release factor 1-like [Source:HGNC Symbol;Acc:HGNC:21051]	1.47438	0.851838	0.791454		0.666064	0.851838	-0.354918
ENSG00000167397	VKORC1	vitamin K epoxide reductase complex, subunit 1 [Source:HGNC Symbol;Acc:HGNC:23663]	1.77607	1.0263	0.791233		0.851175	1.0263	-0.269927
ENSG00000188385	JAKMIP3	Janus kinase and microtubule interacting protein 3 [Source:HGNC Symbol;Acc:HGNC:23523]	0.912342	0.527299	0.790953		0.418027	0.527299	-0.335026
ENSG00000107949	BCCIP	BRCA2 and CDKN1A interacting protein [Source:HGNC Symbol;Acc:HGNC:978]	1.35277	0.782152	0.790394		0.693613	0.782152	-0.173319
ENSG00000185262	UBALD2	UBA-like domain containing 2 [Source:HGNC Symbol;Acc:HGNC:28438]	1.83859	1.06379	0.789389		0.831266	1.06379	-0.355832
ENSG00000138311	ZNF365	zinc finger protein 365 [Source:HGNC Symbol;Acc:HGNC:18194]	1.09166	0.631736	0.789125		0.734987	0.631736	0.218396
ENSG00000006831	ADIPOR2	adiponectin receptor 2 [Source:HGNC Symbol;Acc:HGNC:24041]	2.61029	1.51062	0.789072		1.7447	1.51062	0.207842
ENSG00000155363	MOV10	Mov10 RISC complex RNA helicase [Source:HGNC Symbol;Acc:HGNC:7200]	0.731228	0.423183	0.789041		0.629602	0.423183	0.573159
ENSG00000107295	SH3GL2	SH3-domain GRB2-like 2 [Source:HGNC Symbol;Acc:HGNC:10831]	1.64904	0.954826	0.788315		1.02566	0.954826	0.10324
ENSG00000272674	PCDHB16	protocadherin beta 16 [Source:HGNC Symbol;Acc:HGNC:14546]	1.50268	0.870142	0.78822		1.15751	0.870142	0.411709
ENSG00000101445	PPP1R16B	protein phosphatase 1, regulatory subunit 16B [Source:HGNC Symbol;Acc:HGNC:15850]	1.70153	0.98535	0.788124		1.02947	0.98535	0.0631916
ENSG00000123908	AGO2	argonaute RISC catalytic component 2 [Source:HGNC Symbol;Acc:HGNC:3263]	2.21764	1.28449	0.787836		1.83486	1.28449	0.514476
ENSG00000104722	NEFM	neurofilament, medium polypeptide [Source:HGNC Symbol;Acc:HGNC:7734]	2.69354	1.56026	0.78772		1.57588	1.56026	0.0143771
ENSG00000198909	MAP3K3	mitogen-activated protein kinase kinase kinase 3 [Source:HGNC Symbol;Acc:HGNC:6855]	2.08331	1.20732	0.787073		1.38144	1.20732	0.194369
ENSG00000247077	PGAM5	phosphoglycerate mutase family member 5 [Source:HGNC Symbol;Acc:HGNC:28763]	1.29422	0.750209	0.786719		0.623707	0.750209	-0.266425
ENSG00000100697	DICER1	dicer 1, ribonuclease type III [Source:HGNC Symbol;Acc:HGNC:17098]	1.07102	0.620979	0.786367		0.888769	0.620979	0.517264
ENSG00000103044	HAS3	hyaluronan synthase 3 [Source:HGNC Symbol;Acc:HGNC:4820]	0.751292	0.435637	0.786246		0.570335	0.435637	0.388681
ENSG00000196715	VKORC1L1	vitamin K epoxide reductase complex, subunit 1-like 1 [Source:HGNC Symbol;Acc:HGNC:21492]	1.29376	0.750353	0.785925		0.970601	0.750353	0.371309
ENSG00000103111	MON1B	MON1 secretory trafficking family member B [Source:HGNC Symbol;Acc:HGNC:25020]	0.865096	0.501839	0.785637		0.59254	0.501839	0.239689
ENSG00000111880	RNGTT	RNA guanylyltransferase and 5'-phosphatase [Source:HGNC Symbol;Acc:HGNC:10073]	0.99212	0.576088	0.784225		0.569964	0.576088	-0.0154183
ENSG00000198841	KTI12	KTI12 chromatin associated homolog [Source:HGNC Symbol;Acc:HGNC:25160]	1.07048	0.62172	0.783916		0.852558	0.62172	0.455534
ENSG00000117222	RBBP5	retinoblastoma binding protein 5 [Source:HGNC Symbol;Acc:HGNC:9888]	1.10798	0.643905	0.783017		0.796745	0.643905	0.307272
ENSG00000010072	SPRTN	SprT-like N-terminal domain [Source:HGNC Symbol;Acc:HGNC:25356]	1.3055	0.758786	0.782832		1.33412	0.758786	0.814119
ENSG00000166166	TRMT61A	tRNA methyltransferase 61A [Source:HGNC Symbol;Acc:HGNC:23790]	1.06758	0.620594	0.782628		0.468905	0.620594	-0.404353
ENSG00000007376	RPUSD1	RNA pseudouridylate synthase domain containing 1 [Source:HGNC Symbol;Acc:HGNC:14173]	1.01281	0.588811	0.782488		0.489298	0.588811	-0.267091
ENSG00000180773	SLC36A4	solute carrier family 36 (proton/amino acid symporter), member 4 [Source:HGNC Symbol;Acc:HGNC:19660]	1.50594	0.875506	0.782472		1.02275	0.875506	0.224258
ENSG00000123416	TUBA1B	tubulin, alpha 1b [Source:HGNC Symbol;Acc:HGNC:18809]	1.03079	0.599316	0.782363		0.625228	0.599316	0.0610641
ENSG00000146576	C7orf26	chromosome 7 open reading frame 26 [Source:HGNC Symbol;Acc:HGNC:21702]	1.25662	0.730732	0.782134		0.86205	0.730732	0.238429
ENSG00000108819	PPP1R9B	protein phosphatase 1, regulatory subunit 9B [Source:HGNC Symbol;Acc:HGNC:9298]	1.63819	0.952711	0.781995		0.977768	0.952711	0.0374536
ENSG00000071575	TRIB2	tribbles pseudokinase 2 [Source:HGNC Symbol;Acc:HGNC:30809]	1.48054	0.861128	0.781827		1.13691	0.861128	0.400813
ENSG00000147364	FBXO25	F-box protein 25 [Source:HGNC Symbol;Acc:HGNC:13596]	1.09466	0.636867	0.781425		0.527484	0.636867	-0.271863
ENSG00000168389	MFSD2A	major facilitator superfamily domain containing 2A [Source:HGNC Symbol;Acc:HGNC:25897]	2.01955	1.17506	0.781295		0.970716	1.17506	-0.275615
ENSG00000247315	ZCCHC3	zinc finger, CCHC domain containing 3 [Source:HGNC Symbol;Acc:HGNC:16230]	1.01539	0.590847	0.781173		0.708894	0.590847	0.262786
ENSG00000140859	KIFC3	kinesin family member C3 [Source:HGNC Symbol;Acc:HGNC:6326]	1.52742	0.889229	0.780466		0.767588	0.889229	-0.212223
ENSG00000141338	ABCA8	ATP-binding cassette, sub-family A (ABC1), member 8 [Source:HGNC Symbol;Acc:HGNC:38]	1.91293	1.11375	0.780359		1.12059	1.11375	0.00883342
ENSG00000167566	NCKAP5L	NCK-associated protein 5-like [Source:HGNC Symbol;Acc:HGNC:29321]	1.33008	0.774495	0.780189		0.766392	0.774495	-0.0151738
ENSG00000198492	YTHDF2	YTH N(6)-methyladenosine RNA binding protein 2 [Source:HGNC Symbol;Acc:HGNC:31675]	1.19678	0.696958	0.78002		0.809073	0.696958	0.215198
ENSG00000112062	MAPK14	mitogen-activated protein kinase 14 [Source:HGNC Symbol;Acc:HGNC:6876]	1.30007	0.757173	0.779892		0.971282	0.757173	0.359268
ENSG00000151014	NOCT	nocturnin [Source:HGNC Symbol;Acc:HGNC:14254]	2.35097	1.3695	0.779607		1.9092	1.3695	0.479325
ENSG00000125107	CNOT1	CCR4-NOT transcription complex, subunit 1 [Source:HGNC Symbol;Acc:HGNC:7877]	1.54284	0.898994	0.779209		1.09093	0.898994	0.279173
ENSG00000214595	EML6	echinoderm microtubule associated protein like 6 [Source:HGNC Symbol;Acc:HGNC:35412]	1.54157	0.898497	0.778818		0.848084	0.898497	-0.083307
ENSG00000031823	RANBP3	RAN binding protein 3 [Source:HGNC Symbol;Acc:HGNC:9850]	1.22895	0.716426	0.778539		0.818552	0.716426	0.192255
ENSG00000176597	B3GNT5	UDP-GlcNAc:betaGal beta-1,3-N-acetylglucosaminyltransferase 5 [Source:HGNC Symbol;Acc:HGNC:15684]	1.39765	0.815148	0.777866		0.667591	0.815148	-0.288097
ENSG00000133789	SWAP70	SWAP switching B-cell complex 70kDa subunit [Source:HGNC Symbol;Acc:HGNC:17070]	1.79111	1.04475	0.777701		1.23925	1.04475	0.246308
ENSG00000242259	C22orf39	chromosome 22 open reading frame 39 [Source:HGNC Symbol;Acc:HGNC:27012]	1.25339	0.731327	0.777251		0.516122	0.731327	-0.502805
ENSG00000161547	SRSF2	serine/arginine-rich splicing factor 2 [Source:HGNC Symbol;Acc:HGNC:10783]	1.60823	0.938448	0.777128		1.04732	0.938448	0.158349
ENSG00000101654	RNMT	RNA (guanine-7-) methyltransferase [Source:HGNC Symbol;Acc:HGNC:10075]	1.27191	0.742195	0.777127		0.822436	0.742195	0.148104
ENSG00000163788	SNRK	SNF related kinase [Source:HGNC Symbol;Acc:HGNC:30598]	1.25987	0.735302	0.776867		0.990236	0.735302	0.429436
ENSG00000117477	CCDC181	coiled-coil domain containing 181 [Source:HGNC Symbol;Acc:HGNC:28051]	1.53177	0.894226	0.776488		0.630635	0.894226	-0.503833
ENSG00000143669	LYST	lysosomal trafficking regulator [Source:HGNC Symbol;Acc:HGNC:1968]	1.42324	0.831308	0.775727		0.962256	0.831308	0.211038
ENSG00000116337	AMPD2	adenosine monophosphate deaminase 2 [Source:HGNC Symbol;Acc:HGNC:469]	1.48237	0.865896	0.775642		0.870289	0.865896	0.00730101
ENSG00000156374	PCGF6	polycomb group ring finger 6 [Source:HGNC Symbol;Acc:HGNC:21156]	1.14723	0.670289	0.775294		0.804391	0.670289	0.263113
ENSG00000173418	NAA20	N(alpha)-acetyltransferase 20, NatB catalytic subunit [Source:HGNC Symbol;Acc:HGNC:15908]	1.21105	0.707651	0.775144		0.699158	0.707651	-0.0174204
ENSG00000177614	PGBD5	piggyBac transposable element derived 5 [Source:HGNC Symbol;Acc:HGNC:19405]	1.25461	0.733178	0.775001		0.670467	0.733178	-0.128998
ENSG00000135338	LCA5	Leber congenital amaurosis 5 [Source:HGNC Symbol;Acc:HGNC:31923]	1.42597	0.833345	0.774958		0.932825	0.833345	0.162693
ENSG00000141127	PRPSAP2	phosphoribosyl pyrophosphate synthetase-associated protein 2 [Source:HGNC Symbol;Acc:HGNC:9467]	0.836991	0.489163	0.774896		0.438725	0.489163	-0.156999
ENSG00000215114	UBXN2B	UBX domain protein 2B [Source:HGNC Symbol;Acc:HGNC:27035]	1.30271	0.761454	0.77469		0.846442	0.761454	0.152656
ENSG00000096063	SRPK1	SRSF protein kinase 1 [Source:HGNC Symbol;Acc:HGNC:11305]	1.24071	0.725229	0.774663		0.857659	0.725229	0.241968
ENSG00000159082	SYNJ1	synaptojanin 1 [Source:HGNC Symbol;Acc:HGNC:11503]	1.65917	0.969951	0.774475		1.08544	0.969951	0.162303
ENSG00000196526	AFAP1	actin filament associated protein 1 [Source:HGNC Symbol;Acc:HGNC:24017]	1.20974	0.707215	0.774473		0.961677	0.707215	0.443405
ENSG00000125347	IRF1	interferon regulatory factor 1 [Source:HGNC Symbol;Acc:HGNC:6116]	2.13424	1.24792	0.774197		1.90488	1.24792	0.610178
ENSG00000078804	TP53INP2	tumor protein p53 inducible nuclear protein 2 [Source:HGNC Symbol;Acc:HGNC:16104]	1.95424	1.14292	0.773889		1.51153	1.14292	0.403287
ENSG00000138593	SECISBP2L	SECIS binding protein 2-like [Source:HGNC Symbol;Acc:HGNC:28997]	1.16805	0.683357	0.773388		0.744921	0.683357	0.124448
ENSG00000151208	DLG5	discs, large homolog 5 (Drosophila) [Source:HGNC Symbol;Acc:HGNC:2904]	1.27656	0.747158	0.772777		0.830906	0.747158	0.153272
ENSG00000163818	LZTFL1	leucine zipper transcription factor-like 1 [Source:HGNC Symbol;Acc:HGNC:6741]	1.27871	0.749014	0.771627		0.748322	0.749014	-0.00133409
ENSG00000175455	CCDC14	coiled-coil domain containing 14 [Source:HGNC Symbol;Acc:HGNC:25766]	0.804387	0.471278	0.771311		0.355779	0.471278	-0.405597
ENSG00000071564	TCF3	transcription factor 3 [Source:HGNC Symbol;Acc:HGNC:11633]	1.64702	0.96511	0.771091		0.982478	0.96511	0.025732
ENSG00000129925	TMEM8A	transmembrane protein 8A [Source:HGNC Symbol;Acc:HGNC:17205]	1.40739	0.824843	0.770832		0.533218	0.824843	-0.629396
ENSG00000143621	ILF2	interleukin enhancer binding factor 2 [Source:HGNC Symbol;Acc:HGNC:6037]	1.31325	0.770105	0.770017		0.765237	0.770105	-0.00914937
ENSG00000167657	DAPK3	death-associated protein kinase 3 [Source:HGNC Symbol;Acc:HGNC:2676]	1.66904	0.978765	0.769981		0.925267	0.978765	-0.0810933
ENSG00000168936	TMEM129	transmembrane protein 129, E3 ubiquitin protein ligase [Source:HGNC Symbol;Acc:HGNC:25137]	0.796034	0.466818	0.76997		0.726949	0.466818	0.638993
ENSG00000159409	CELF3	CUGBP, Elav-like family member 3 [Source:HGNC Symbol;Acc:HGNC:11967]	1.4578	0.855074	0.769672		0.96144	0.855074	0.169147
ENSG00000130699	TAF4	TAF4 RNA polymerase II, TATA box binding protein (TBP)-associated factor, 135kDa [Source:HGNC Symbol;Acc:HGNC:11537]	1.26401	0.741596	0.769297		1.09655	0.741596	0.564269
ENSG00000160446	ZDHHC12	zinc finger, DHHC-type containing 12 [Source:HGNC Symbol;Acc:HGNC:19159]	0.940146	0.551623	0.769201		0.410393	0.551623	-0.426676
ENSG00000165732	DDX21	DEAD (Asp-Glu-Ala-Asp) box helicase 21 [Source:HGNC Symbol;Acc:HGNC:2744]	1.48689	0.873003	0.76824		0.811947	0.873003	-0.104601
ENSG00000121879	PIK3CA	phosphatidylinositol-4,5-bisphosphate 3-kinase, catalytic subunit alpha [Source:HGNC Symbol;Acc:HGNC:8975]	1.77175	1.04042	0.768016		1.01369	1.04042	-0.0375425
ENSG00000104687	GSR	glutathione reductase [Source:HGNC Symbol;Acc:HGNC:4623]	1.3018	0.764472	0.767974		0.917157	0.764472	0.262705
ENSG00000109917	ZPR1	ZPR1 zinc finger [Source:HGNC Symbol;Acc:HGNC:13051]	1.37433	0.807075	0.767953		0.923994	0.807075	0.19518
ENSG00000029363	BCLAF1	BCL2-associated transcription factor 1 [Source:HGNC Symbol;Acc:HGNC:16863]	1.14591	0.673218	0.767351		1.01792	0.673218	0.596477
ENSG00000165392	WRN	Werner syndrome, RecQ helicase-like [Source:HGNC Symbol;Acc:HGNC:12791]	0.997173	0.585872	0.767259		0.579365	0.585872	-0.0161114
ENSG00000118263	KLF7	Kruppel-like factor 7 (ubiquitous) [Source:HGNC Symbol;Acc:HGNC:6350]	1.13216	0.665221	0.767175		0.880366	0.665221	0.404269
ENSG00000139645	ANKRD52	ankyrin repeat domain 52 [Source:HGNC Symbol;Acc:HGNC:26614]	1.49944	0.881135	0.766993		1.22779	0.881135	0.478632
ENSG00000136758	YME1L1	YME1-like 1 ATPase [Source:HGNC Symbol;Acc:HGNC:12843]	1.46484	0.861395	0.765997		0.94063	0.861395	0.126952
ENSG00000185033	SEMA4B	sema domain, immunoglobulin domain (Ig), transmembrane domain (TM) and short cytoplasmic domain, (semaphorin) 4B [Source:HGNC Symbol;Acc:HGNC:10730]	0.878814	0.516877	0.765737		0.629564	0.516877	0.284532
ENSG00000100811	YY1	YY1 transcription factor [Source:HGNC Symbol;Acc:HGNC:12856]	2.51791	1.48102	0.765629		1.69012	1.48102	0.190533
ENSG00000158710	TAGLN2	transgelin 2 [Source:HGNC Symbol;Acc:HGNC:11554]	2.13866	1.25833	0.765201		1.29466	1.25833	0.041066
ENSG00000020577	SAMD4A	sterile alpha motif domain containing 4A [Source:HGNC Symbol;Acc:HGNC:23023]	2.92287	1.71987	0.765082		2.30265	1.71987	0.420993
ENSG00000080371	RAB21	RAB21, member RAS oncogene family [Source:HGNC Symbol;Acc:HGNC:18263]	1.745	1.02713	0.7646		1.22252	1.02713	0.251235
ENSG00000166900	STX3	syntaxin 3 [Source:HGNC Symbol;Acc:HGNC:11438]	1.54022	0.906987	0.763987		0.900762	0.906987	-0.00993554
ENSG00000006432	MAP3K9	mitogen-activated protein kinase kinase kinase 9 [Source:HGNC Symbol;Acc:HGNC:6861]	1.757	1.03484	0.7637		1.03237	1.03484	-0.00345101
ENSG00000033030	ZCCHC8	zinc finger, CCHC domain containing 8 [Source:HGNC Symbol;Acc:HGNC:25265]	1.14619	0.675146	0.763575		0.972854	0.675146	0.527023
ENSG00000163288	GABRB1	gamma-aminobutyric acid (GABA) A receptor, beta 1 [Source:HGNC Symbol;Acc:HGNC:4081]	1.42571	0.840258	0.762779		1.1167	0.840258	0.410342
ENSG00000138495	COX17	COX17 cytochrome c oxidase copper chaperone [Source:HGNC Symbol;Acc:HGNC:2264]	1.10467	0.651136	0.762582		0.504301	0.651136	-0.368674
ENSG00000175352	NRIP3	nuclear receptor interacting protein 3 [Source:HGNC Symbol;Acc:HGNC:1167]	2.3408	1.37996	0.762372		1.38175	1.37996	0.00186652
ENSG00000127124	HIVEP3	human immunodeficiency virus type I enhancer binding protein 3 [Source:HGNC Symbol;Acc:HGNC:13561]	1.61885	0.954881	0.761573		0.697781	0.954881	-0.452546
ENSG00000167981	ZNF597	zinc finger protein 597 [Source:HGNC Symbol;Acc:HGNC:26573]	1.23406	0.727971	0.761465		0.846809	0.727971	0.218155
ENSG00000021762	OSBPL5	oxysterol binding protein-like 5 [Source:HGNC Symbol;Acc:HGNC:16392]	1.08062	0.637543	0.761259		0.489352	0.637543	-0.38165
ENSG00000162873	KLHDC8A	kelch domain containing 8A [Source:HGNC Symbol;Acc:HGNC:25573]	1.48655	0.877211	0.760976		0.76998	0.877211	-0.188103
ENSG00000169410	PTPN9	protein tyrosine phosphatase, non-receptor type 9 [Source:HGNC Symbol;Acc:HGNC:9661]	1.08858	0.642546	0.76057		0.694812	0.642546	0.112823
ENSG00000144021	CIAO1	cytosolic iron-sulfur assembly component 1 [Source:HGNC Symbol;Acc:HGNC:14280]	0.962345	0.568119	0.76036		0.665524	0.568119	0.228297
ENSG00000156026	MCU	mitochondrial calcium uniporter [Source:HGNC Symbol;Acc:HGNC:23526]	1.18689	0.700852	0.76		0.776546	0.700852	0.147963
ENSG00000242802	AP5Z1	adaptor-related protein complex 5, zeta 1 subunit [Source:HGNC Symbol;Acc:HGNC:22197]	1.0106	0.596785	0.759928		0.464068	0.596785	-0.362874
ENSG00000131669	NINJ1	ninjurin 1 [Source:HGNC Symbol;Acc:HGNC:7824]	1.36281	0.805165	0.759231		0.802728	0.805165	-0.00437331
ENSG00000198954	KIF1BP	KIF1 binding protein [Source:HGNC Symbol;Acc:HGNC:23419]	1.45829	0.861644	0.759109		0.872898	0.861644	0.0187201
ENSG00000166477	LEO1	LEO1 homolog, Paf1/RNA polymerase II complex component [Source:HGNC Symbol;Acc:HGNC:30401]	1.37194	0.810709	0.758956		0.847053	0.810709	0.0632671
ENSG00000143195	ILDR2	immunoglobulin-like domain containing receptor 2 [Source:HGNC Symbol;Acc:HGNC:18131]	1.52246	0.899768	0.758774		1.05758	0.899768	0.233139
ENSG00000225697	SLC26A6	solute carrier family 26 (anion exchanger), member 6 [Source:HGNC Symbol;Acc:HGNC:14472]	1.28769	0.761157	0.758521		0.855781	0.761157	0.169048
ENSG00000123268	ATF1	activating transcription factor 1 [Source:HGNC Symbol;Acc:HGNC:783]	1.64097	0.97009	0.758357		1.15032	0.97009	0.245851
ENSG00000134323	MYCN	v-myc avian myelocytomatosis viral oncogene neuroblastoma derived homolog [Source:HGNC Symbol;Acc:HGNC:7559]	0.756289	0.447269	0.757795		0.542988	0.447269	0.279779
ENSG00000186130	ZBTB6	zinc finger and BTB domain containing 6 [Source:HGNC Symbol;Acc:HGNC:16764]	0.529977	0.313462	0.757639		0.526283	0.313462	0.747546
ENSG00000099385	BCL7C	B-cell CLL/lymphoma 7C [Source:HGNC Symbol;Acc:HGNC:1006]	1.3272	0.785107	0.757429		0.707732	0.785107	-0.149686
ENSG00000167971	CASKIN1	CASK interacting protein 1 [Source:HGNC Symbol;Acc:HGNC:20879]	1.49058	0.882103	0.756855		0.879999	0.882103	-0.00344562
ENSG00000146476	ARMT1	acidic residue methyltransferase 1 [Source:HGNC Symbol;Acc:HGNC:17872]	0.947755	0.560899	0.756772		0.573324	0.560899	0.0316102
ENSG00000162923	WDR26	WD repeat domain 26 [Source:HGNC Symbol;Acc:HGNC:21208]	2.06581	1.22263	0.756719		1.46737	1.22263	0.263245
ENSG00000162614	NEXN	nexilin (F actin binding protein) [Source:HGNC Symbol;Acc:HGNC:29557]	0.969085	0.573599	0.756581		1.03998	0.573599	0.858443
ENSG00000163558	PRKCI	protein kinase C, iota [Source:HGNC Symbol;Acc:HGNC:9404]	1.69133	1.00154	0.755936		1.02393	1.00154	0.0318957
ENSG00000012232	EXTL3	exostosin-like glycosyltransferase 3 [Source:HGNC Symbol;Acc:HGNC:3518]	1.03275	0.611658	0.755686		0.662953	0.611658	0.116181
ENSG00000165716	FAM69B	family with sequence similarity 69, member B [Source:HGNC Symbol;Acc:HGNC:28290]	1.23828	0.733566	0.755342		0.512691	0.733566	-0.516836
ENSG00000186174	BCL9L	B-cell CLL/lymphoma 9-like [Source:HGNC Symbol;Acc:HGNC:23688]	1.70228	1.00891	0.754673		1.14347	1.00891	0.18063
ENSG00000087095	NLK	nemo-like kinase [Source:HGNC Symbol;Acc:HGNC:29858]	1.1343	0.672327	0.754564		0.976282	0.672327	0.538135
ENSG00000170837	GPR27	G protein-coupled receptor 27 [Source:HGNC Symbol;Acc:HGNC:4482]	1.36059	0.806464	0.754549		1.03664	0.806464	0.362227
ENSG00000170604	IRF2BP1	interferon regulatory factor 2 binding protein 1 [Source:HGNC Symbol;Acc:HGNC:21728]	0.835301	0.495146	0.754443		0.769741	0.495146	0.636518
ENSG00000171953	ATPAF2	ATP synthase mitochondrial F1 complex assembly factor 2 [Source:HGNC Symbol;Acc:HGNC:18802]	1.4855	0.880715	0.7542		0.802053	0.880715	-0.134978
ENSG00000182154	MRPL41	mitochondrial ribosomal protein L41 [Source:HGNC Symbol;Acc:HGNC:14492]	1.06429	0.631083	0.753993		0.396738	0.631083	-0.669644
ENSG00000115137	DNAJC27	DnaJ (Hsp40) homolog, subfamily C, member 27 [Source:HGNC Symbol;Acc:HGNC:30290]	1.6247	0.963657	0.753587		1.16562	0.963657	0.274512
ENSG00000135821	GLUL	glutamate-ammonia ligase [Source:HGNC Symbol;Acc:HGNC:4341]	1.28085	0.760484	0.752114		0.863185	0.760484	0.182751
ENSG00000275004	ZNF280B	zinc finger protein 280B [Source:HGNC Symbol;Acc:HGNC:23022]	0.974061	0.578463	0.751788		0.592943	0.578463	0.0356701
ENSG00000170892	TSEN34	TSEN34 tRNA splicing endonuclease subunit [Source:HGNC Symbol;Acc:HGNC:15506]	1.84019	1.09293	0.751663		0.967919	1.09293	-0.175237
ENSG00000166225	FRS2	fibroblast growth factor receptor substrate 2 [Source:HGNC Symbol;Acc:HGNC:16971]	1.31897	0.783426	0.751542		0.92879	0.783426	0.245555
ENSG00000185344	ATP6V0A2	ATPase, H+ transporting, lysosomal V0 subunit a2 [Source:HGNC Symbol;Acc:HGNC:18481]	1.00052	0.594304	0.751475		0.758192	0.594304	0.351364
ENSG00000169375	SIN3A	SIN3 transcription regulator family member A [Source:HGNC Symbol;Acc:HGNC:19353]	1.45912	0.867088	0.750851		1.0696	0.867088	0.302817
ENSG00000160209	PDXK	pyridoxal (pyridoxine, vitamin B6) kinase [Source:HGNC Symbol;Acc:HGNC:8819]	1.39202	0.827837	0.749763		0.749285	0.827837	-0.143833
ENSG00000155265	GOLGA7B	golgin A7 family, member B [Source:HGNC Symbol;Acc:HGNC:31668]	1.46894	0.873929	0.749187		0.727812	0.873929	-0.26395
ENSG00000135083	CCNJL	cyclin J-like [Source:HGNC Symbol;Acc:HGNC:25876]	0.928803	0.552841	0.748509		1.03521	0.552841	0.90499
ENSG00000162980	ARL5A	ADP-ribosylation factor-like 5A [Source:HGNC Symbol;Acc:HGNC:696]	1.19312	0.710295	0.748249		0.708303	0.710295	-0.00405289
ENSG00000187764	SEMA4D	sema domain, immunoglobulin domain (Ig), transmembrane domain (TM) and short cytoplasmic domain, (semaphorin) 4D [Source:HGNC Symbol;Acc:HGNC:10732]	0.888103	0.528841	0.747893		0.727754	0.528841	0.460616
ENSG00000146350	TBC1D32	TBC1 domain family, member 32 [Source:HGNC Symbol;Acc:HGNC:21485]	0.951607	0.56679	0.747552		0.548849	0.56679	-0.0464043
ENSG00000107371	EXOSC3	exosome component 3 [Source:HGNC Symbol;Acc:HGNC:17944]	1.04512	0.622585	0.747329		0.751686	0.622585	0.271859
ENSG00000114331	ACAP2	ArfGAP with coiled-coil, ankyrin repeat and PH domains 2 [Source:HGNC Symbol;Acc:HGNC:16469]	1.34734	0.802785	0.74703		1.04427	0.802785	0.379416
ENSG00000148158	SNX30	sorting nexin family member 30 [Source:HGNC Symbol;Acc:HGNC:23685]	1.33983	0.798381	0.746898		0.871957	0.798381	0.12718
ENSG00000174775	HRAS	Harvey rat sarcoma viral oncogene homolog [Source:HGNC Symbol;Acc:HGNC:5173]	1.47593	0.879555	0.746781		0.707713	0.879555	-0.31361
ENSG00000175768	TOMM5	translocase of outer mitochondrial membrane 5 homolog (yeast) [Source:HGNC Symbol;Acc:HGNC:31369]	1.28892	0.76854	0.745969		0.594084	0.76854	-0.371454
ENSG00000116350	SRSF4	serine/arginine-rich splicing factor 4 [Source:HGNC Symbol;Acc:HGNC:10786]	1.42517	0.84978	0.745968		1.05831	0.84978	0.316596
ENSG00000129245	FXR2	fragile X mental retardation, autosomal homolog 2 [Source:HGNC Symbol;Acc:HGNC:4024]	1.40339	0.837215	0.745249		0.996519	0.837215	0.251299
ENSG00000143393	PI4KB	phosphatidylinositol 4-kinase, catalytic, beta [Source:HGNC Symbol;Acc:HGNC:8984]	1.45459	0.867868	0.74507		0.852252	0.867868	-0.0261949
ENSG00000101438	SLC32A1	solute carrier family 32 (GABA vesicular transporter), member 1 [Source:HGNC Symbol;Acc:HGNC:11018]	1.85968	1.10956	0.745064		1.52066	1.10956	0.454704
ENSG00000088899	LZTS3	Leucine zipper putative tumor suppressor 3 [Source:UniProtKB/Swiss-Prot;Acc:O60299]	1.22841	0.733584	0.743757		0.785555	0.733584	0.0987488
ENSG00000198695	MT-ND6	mitochondrially encoded NADH dehydrogenase 6 [Source:HGNC Symbol;Acc:HGNC:7462]	0.956996	0.571571	0.743582		1.03145	0.571571	0.851675
ENSG00000140948	ZCCHC14	zinc finger, CCHC domain containing 14 [Source:HGNC Symbol;Acc:HGNC:24134]	1.27132	0.759847	0.742552		1.06094	0.759847	0.481568
ENSG00000169180	XPO6	exportin 6 [Source:HGNC Symbol;Acc:HGNC:19733]	1.38013	0.825168	0.742043		0.849053	0.825168	0.0411671
ENSG00000025772	TOMM34	translocase of outer mitochondrial membrane 34 [Source:HGNC Symbol;Acc:HGNC:15746]	1.13898	0.681299	0.741389		0.698371	0.681299	0.0357061
ENSG00000107130	NCS1	neuronal calcium sensor 1 [Source:HGNC Symbol;Acc:HGNC:3953]	1.41295	0.84522	0.741316		0.76744	0.84522	-0.139273
ENSG00000069248	NUP133	nucleoporin 133kDa [Source:HGNC Symbol;Acc:HGNC:18016]	1.16646	0.697769	0.741314		0.806289	0.697769	0.208547
ENSG00000179988	PSTK	phosphoseryl-tRNA kinase [Source:HGNC Symbol;Acc:HGNC:28578]	0.714306	0.427419	0.740892		0.41928	0.427419	-0.0277366
ENSG00000063660	GPC1	glypican 1 [Source:HGNC Symbol;Acc:HGNC:4449]	1.04136	0.623236	0.740617		0.81647	0.623236	0.389621
ENSG00000112787	FBRSL1	fibrosin-like 1 [Source:HGNC Symbol;Acc:HGNC:29308]	1.53502	0.918729	0.74055		0.934317	0.918729	0.0242715
ENSG00000123360	PDE1B	phosphodiesterase 1B, calmodulin-dependent [Source:HGNC Symbol;Acc:HGNC:8775]	1.19078	0.712721	0.740498		0.579801	0.712721	-0.297778
ENSG00000260230	FRRS1L	ferric-chelate reductase 1-like [Source:HGNC Symbol;Acc:HGNC:1362]	1.18517	0.709373	0.740481		0.651113	0.709373	-0.123636
ENSG00000206418	RAB12	RAB12, member RAS oncogene family [Source:HGNC Symbol;Acc:HGNC:31332]	1.29306	0.77397	0.740443		0.798425	0.77397	0.0448796
ENSG00000133612	AGAP3	ArfGAP with GTPase domain, ankyrin repeat and PH domain 3 [Source:HGNC Symbol;Acc:HGNC:16923]	2.37848	1.42376	0.74034		1.33073	1.42376	-0.097489
ENSG00000166130	IKBIP	IKBKB interacting protein [Source:HGNC Symbol;Acc:HGNC:26430]	1.62616	0.973423	0.740331		0.972539	0.973423	-0.00131081
ENSG00000135093	USP30	ubiquitin specific peptidase 30 [Source:HGNC Symbol;Acc:HGNC:20065]	0.968518	0.579781	0.74027		0.783068	0.579781	0.433629
ENSG00000163104	SMARCAD1	SWI/SNF-related, matrix-associated actin-dependent regulator of chromatin, subfamily a, containing DEAD/H box 1 [Source:HGNC Symbol;Acc:HGNC:18398]	0.969601	0.580439	0.740248		0.730225	0.580439	0.331198
ENSG00000112473	SLC39A7	solute carrier family 39 (zinc transporter), member 7 [Source:HGNC Symbol;Acc:HGNC:4927]	1.49505	0.895001	0.740228		1.17237	0.895001	0.38947
ENSG00000196505	GDAP2	ganglioside induced differentiation associated protein 2 [Source:HGNC Symbol;Acc:HGNC:18010]	1.89869	1.13673	0.740108		1.15351	1.13673	0.0211354
ENSG00000102038	SMARCA1	SWI/SNF related, matrix associated, actin dependent regulator of chromatin, subfamily a, member 1 [Source:HGNC Symbol;Acc:HGNC:11097]	1.28116	0.767218	0.739748		0.752982	0.767218	-0.0270197
ENSG00000160218	TRAPPC10	trafficking protein particle complex 10 [Source:HGNC Symbol;Acc:HGNC:11868]	1.42896	0.855727	0.739741		0.917056	0.855727	0.0998594
ENSG00000135540	NHSL1	NHS-like 1 [Source:HGNC Symbol;Acc:HGNC:21021]	2.03642	1.21956	0.739672		1.00357	1.21956	-0.281222
ENSG00000162522	KIAA1522	KIAA1522 [Source:HGNC Symbol;Acc:HGNC:29301]	1.67522	1.00327	0.739644		1.26773	1.00327	0.337539
ENSG00000243156	MICAL3	microtubule associated monooxygenase, calponin and LIM domain containing 3 [Source:HGNC Symbol;Acc:HGNC:24694]	1.20907	0.724448	0.738939		0.622325	0.724448	-0.219214
ENSG00000128585	MKLN1	muskelin 1, intracellular mediator containing kelch motifs [Source:HGNC Symbol;Acc:HGNC:7109]	1.7464	1.04666	0.738594		1.1504	1.04666	0.136344
ENSG00000163686	ABHD6	abhydrolase domain containing 6 [Source:HGNC Symbol;Acc:HGNC:21398]	1.20522	0.722359	0.738508		0.644009	0.722359	-0.165637
ENSG00000111252	SH2B3	SH2B adaptor protein 3 [Source:HGNC Symbol;Acc:HGNC:29605]	1.19753	0.717938	0.738128		0.861208	0.717938	0.262502
ENSG00000119231	SENP5	SUMO1/sentrin specific peptidase 5 [Source:HGNC Symbol;Acc:HGNC:28407]	1.34172	0.804573	0.737792		1.02985	0.804573	0.356143
ENSG00000007944	MYLIP	myosin regulatory light chain interacting protein [Source:HGNC Symbol;Acc:HGNC:21155]	1.68488	1.01065	0.737363		1.69485	1.01065	0.745868
ENSG00000075429	CACNG5	calcium channel, voltage-dependent, gamma subunit 5 [Source:HGNC Symbol;Acc:HGNC:1409]	1.09229	0.65523	0.737285		2.04981	0.65523	1.64542
ENSG00000058453	CROCC	ciliary rootlet coiled-coil, rootletin [Source:HGNC Symbol;Acc:HGNC:21299]	0.891937	0.535077	0.737195		0.517621	0.535077	-0.0478489
ENSG00000117335	CD46	CD46 molecule, complement regulatory protein [Source:HGNC Symbol;Acc:HGNC:6953]	1.06941	0.64155	0.737176		0.758008	0.64155	0.240653
ENSG00000163083	INHBB	inhibin, beta B [Source:HGNC Symbol;Acc:HGNC:6067]	0.716543	0.429907	0.737028		0.881628	0.429907	1.03614
ENSG00000148082	SHC3	SHC (Src homology 2 domain containing) transforming protein 3 [Source:HGNC Symbol;Acc:HGNC:18181]	1.53766	0.922605	0.736954		1.37463	0.922605	0.575261
ENSG00000167196	FBXO22	F-box protein 22 [Source:HGNC Symbol;Acc:HGNC:13593]	1.23166	0.739059	0.736844		0.676787	0.739059	-0.126988
ENSG00000138190	EXOC6	exocyst complex component 6 [Source:HGNC Symbol;Acc:HGNC:23196]	0.981663	0.589298	0.736231		0.621947	0.589298	0.0777947
ENSG00000121864	ZNF639	zinc finger protein 639 [Source:HGNC Symbol;Acc:HGNC:30950]	1.29786	0.779213	0.73605		0.805579	0.779213	0.0480092
ENSG00000100908	EMC9	ER membrane protein complex subunit 9 [Source:HGNC Symbol;Acc:HGNC:20273]	1.20658	0.724443	0.735978		0.46962	0.724443	-0.625379
ENSG00000225968	ELFN1	extracellular leucine-rich repeat and fibronectin type III domain containing 1 [Source:HGNC Symbol;Acc:HGNC:33154]	1.22995	0.738631	0.735674		0.748274	0.738631	0.0187125
ENSG00000182870	GALNT9	polypeptide N-acetylgalactosaminyltransferase 9 [Source:HGNC Symbol;Acc:HGNC:4131]	1.35612	0.814436	0.735613		0.687488	0.814436	-0.244466
ENSG00000086232	EIF2AK1	eukaryotic translation initiation factor 2-alpha kinase 1 [Source:HGNC Symbol;Acc:HGNC:24921]	1.16765	0.701378	0.735339		0.659023	0.701378	-0.0898638
ENSG00000139131	YARS2	tyrosyl-tRNA synthetase 2, mitochondrial [Source:HGNC Symbol;Acc:HGNC:24249]	1.40187	0.842196	0.735126		0.721303	0.842196	-0.223551
ENSG00000120690	ELF1	E74-like factor 1 (ets domain transcription factor) [Source:HGNC Symbol;Acc:HGNC:3316]	2.46214	1.4792	0.735094		1.83125	1.4792	0.308008
ENSG00000127399	LRRC61	leucine rich repeat containing 61 [Source:HGNC Symbol;Acc:HGNC:21704]	1.18629	0.712767	0.734959		0.402908	0.712767	-0.822982
ENSG00000149930	TAOK2	TAO kinase 2 [Source:HGNC Symbol;Acc:HGNC:16835]	1.04488	0.627891	0.734749		0.734365	0.627891	0.225983
ENSG00000088812	ATRN	attractin [Source:HGNC Symbol;Acc:HGNC:885]	1.24987	0.751215	0.734479		0.820171	0.751215	0.126698
ENSG00000198815	FOXJ3	forkhead box J3 [Source:HGNC Symbol;Acc:HGNC:29178]	1.31071	0.7878	0.734447		0.837527	0.7878	0.0883061
ENSG00000136827	TOR1A	torsin family 1, member A (torsin A) [Source:HGNC Symbol;Acc:HGNC:3098]	1.01366	0.609495	0.733885		0.665019	0.609495	0.125779
ENSG00000064932	SBNO2	strawberry notch homolog 2 (Drosophila) [Source:HGNC Symbol;Acc:HGNC:29158]	1.27545	0.766991	0.733723		0.856678	0.766991	0.159544
ENSG00000118276	B4GALT6	UDP-Gal:betaGlcNAc beta 1,4- galactosyltransferase, polypeptide 6 [Source:HGNC Symbol;Acc:HGNC:929]	1.25289	0.753674	0.733244		0.741197	0.753674	-0.0240833
ENSG00000147234	FRMPD3	FERM and PDZ domain containing 3 [Source:HGNC Symbol;Acc:HGNC:29382]	1.54185	0.927607	0.733077		0.98712	0.927607	0.0897119
ENSG00000186908	ZDHHC17	zinc finger, DHHC-type containing 17 [Source:HGNC Symbol;Acc:HGNC:18412]	1.04977	0.631931	0.732237		0.779322	0.631931	0.302454
ENSG00000224051	CPTP	ceramide-1-phosphate transfer protein [Source:HGNC Symbol;Acc:HGNC:28116]	1.0112	0.608958	0.731653		0.683064	0.608958	0.165677
ENSG00000136643	RPS6KC1	ribosomal protein S6 kinase, 52kDa, polypeptide 1 [Source:HGNC Symbol;Acc:HGNC:10439]	1.22602	0.738341	0.731623		0.677088	0.738341	-0.124943
ENSG00000133619	KRBA1	KRAB-A domain containing 1 [Source:HGNC Symbol;Acc:HGNC:22228]	0.887788	0.534699	0.731489		0.585597	0.534699	0.131181
ENSG00000006062	MAP3K14	mitogen-activated protein kinase kinase kinase 14 [Source:HGNC Symbol;Acc:HGNC:6853]	1.35856	0.818776	0.730534		0.819213	0.818776	0.0007682
ENSG00000167280	ENGASE	endo-beta-N-acetylglucosaminidase [Source:HGNC Symbol;Acc:HGNC:24622]	0.950815	0.573277	0.729932		0.381465	0.573277	-0.58768
ENSG00000132718	SYT11	synaptotagmin XI [Source:HGNC Symbol;Acc:HGNC:19239]	1.53882	0.927842	0.72987		0.993413	0.927842	0.0985133
ENSG00000112200	ZNF451	zinc finger protein 451 [Source:HGNC Symbol;Acc:HGNC:21091]	0.970282	0.58509	0.729747		0.914591	0.58509	0.64447
ENSG00000148468	FAM171A1	family with sequence similarity 171, member A1 [Source:HGNC Symbol;Acc:HGNC:23522]	1.05026	0.633331	0.729713		0.584341	0.633331	-0.116149
ENSG00000156140	ADAMTS3	ADAM metallopeptidase with thrombospondin type 1 motif, 3 [Source:HGNC Symbol;Acc:HGNC:219]	1.52444	0.919343	0.729606		0.974801	0.919343	0.084504
ENSG00000151502	VPS26B	VPS26 retromer complex component B [Source:HGNC Symbol;Acc:HGNC:28119]	1.29227	0.779409	0.729459		0.858906	0.779409	0.140119
ENSG00000132196	HSD17B7	hydroxysteroid (17-beta) dehydrogenase 7 [Source:HGNC Symbol;Acc:HGNC:5215]	1.40784	0.849163	0.729369		0.917685	0.849163	0.111957
ENSG00000176182	MYPOP	Myb-related transcription factor, partner of profilin [Source:HGNC Symbol;Acc:HGNC:20178]	1.12341	0.677764	0.729023		0.666979	0.677764	-0.0231432
ENSG00000121289	CEP89	centrosomal protein 89kDa [Source:HGNC Symbol;Acc:HGNC:25907]	1.35711	0.819236	0.728191		1.08425	0.819236	0.404339
ENSG00000105643	ARRDC2	arrestin domain containing 2 [Source:HGNC Symbol;Acc:HGNC:25225]	1.24549	0.751872	0.728156		0.553037	0.751872	-0.443111
ENSG00000163171	CDC42EP3	CDC42 effector protein (Rho GTPase binding) 3 [Source:HGNC Symbol;Acc:HGNC:16943]	1.64168	0.991283	0.727805		0.731069	0.991283	-0.439289
ENSG00000067369	TP53BP1	tumor protein p53 binding protein 1 [Source:HGNC Symbol;Acc:HGNC:11999]	1.6752	1.0121	0.726987		1.23518	1.0121	0.287373
ENSG00000124507	PACSIN1	protein kinase C and casein kinase substrate in neurons 1 [Source:HGNC Symbol;Acc:HGNC:8570]	1.16801	0.705761	0.726803		0.525503	0.705761	-0.425481
ENSG00000071462	WBSCR22	Williams Beuren syndrome chromosome region 22 [Source:HGNC Symbol;Acc:HGNC:16405]	1.46781	0.886972	0.726707		0.803788	0.886972	-0.142074
ENSG00000140600	SH3GL3	SH3-domain GRB2-like 3 [Source:HGNC Symbol;Acc:HGNC:10832]	1.65133	0.997979	0.726547		1.16988	0.997979	0.229283
ENSG00000081721	DUSP12	dual specificity phosphatase 12 [Source:HGNC Symbol;Acc:HGNC:3067]	1.28908	0.779344	0.72601		0.557006	0.779344	-0.484568
ENSG00000147162	OGT	O-linked N-acetylglucosamine (GlcNAc) transferase [Source:HGNC Symbol;Acc:HGNC:8127]	1.65489	1.00056	0.725926		1.07498	1.00056	0.103502
ENSG00000177932	ZNF354C	zinc finger protein 354C [Source:HGNC Symbol;Acc:HGNC:16736]	0.613582	0.37099	0.725875		0.573409	0.37099	0.628183
ENSG00000138443	ABI2	abl-interactor 2 [Source:HGNC Symbol;Acc:HGNC:24011]	1.45863	0.882031	0.725717		1.01664	0.882031	0.204911
ENSG00000150787	PTS	6-pyruvoyltetrahydropterin synthase [Source:HGNC Symbol;Acc:HGNC:9689]	1.58289	0.957434	0.725315		0.812547	0.957434	-0.236721
ENSG00000119684	MLH3	mutL homolog 3 [Source:HGNC Symbol;Acc:HGNC:7128]	0.496313	0.300226	0.725203		0.253784	0.300226	-0.242445
ENSG00000117625	RCOR3	REST corepressor 3 [Source:HGNC Symbol;Acc:HGNC:25594]	0.887733	0.537096	0.724945		0.752464	0.537096	0.486442
ENSG00000104888	SLC17A7	solute carrier family 17 (vesicular glutamate transporter), member 7 [Source:HGNC Symbol;Acc:HGNC:16704]	1.56602	0.947518	0.724882		0.830787	0.947518	-0.189674
ENSG00000187325	TAF9B	TAF9B RNA polymerase II, TATA box binding protein (TBP)-associated factor, 31kDa [Source:HGNC Symbol;Acc:HGNC:17306]	0.870263	0.526647	0.724615		0.563187	0.526647	0.0967774
ENSG00000203760	CENPW	centromere protein W [Source:HGNC Symbol;Acc:HGNC:21488]	1.42025	0.859626	0.72437		0.8138	0.859626	-0.079034
ENSG00000095002	MSH2	mutS homolog 2 [Source:HGNC Symbol;Acc:HGNC:7325]	1.06268	0.643424	0.723865		0.459273	0.643424	-0.486419
ENSG00000168502	MTCL1	microtubule crosslinking factor 1 [Source:HGNC Symbol;Acc:HGNC:29121]	1.68855	1.02244	0.72377		1.30232	1.02244	0.349071
ENSG00000070495	JMJD6	jumonji domain containing 6 [Source:HGNC Symbol;Acc:HGNC:19355]	2.17341	1.31607	0.723728		0.996696	1.31607	-0.401009
ENSG00000135503	ACVR1B	activin A receptor, type IB [Source:HGNC Symbol;Acc:HGNC:172]	0.958967	0.580829	0.723369		0.557168	0.580829	-0.0600008
ENSG00000196756	SNHG17	small nucleolar RNA host gene 17 [Source:HGNC Symbol;Acc:HGNC:48600]	1.61303	0.977045	0.723278		0.778244	0.977045	-0.328202
ENSG00000162407	PPAP2B	phosphatidic acid phosphatase type 2B [Source:HGNC Symbol;Acc:HGNC:9229]	0.945984	0.573249	0.722654		0.831061	0.573249	0.535793
ENSG00000142166	IFNAR1	interferon (alpha, beta and omega) receptor 1 [Source:HGNC Symbol;Acc:HGNC:5432]	0.80541	0.488153	0.72239		0.514718	0.488153	0.076449
ENSG00000142453	CARM1	coactivator-associated arginine methyltransferase 1 [Source:HGNC Symbol;Acc:HGNC:23393]	1.17215	0.710675	0.72189		0.722954	0.710675	0.0247143
ENSG00000150551	LYPD1	LY6/PLAUR domain containing 1 [Source:HGNC Symbol;Acc:HGNC:28431]	1.22406	0.742358	0.721488		0.575855	0.742358	-0.366409
ENSG00000135823	STX6	syntaxin 6 [Source:HGNC Symbol;Acc:HGNC:11441]	1.44976	0.879237	0.721487		0.643172	0.879237	-0.451046
ENSG00000172031	EPHX4	epoxide hydrolase 4 [Source:HGNC Symbol;Acc:HGNC:23758]	1.70284	1.03288	0.721277		0.913201	1.03288	-0.177663
ENSG00000083168	KAT6A	K(lysine) acetyltransferase 6A [Source:HGNC Symbol;Acc:HGNC:13013]	1.08162	0.656131	0.721136		0.996394	0.656131	0.602733
ENSG00000126821	SGPP1	sphingosine-1-phosphate phosphatase 1 [Source:HGNC Symbol;Acc:HGNC:17720]	1.28299	0.778343	0.721034		0.963692	0.778343	0.308167
ENSG00000121274	PAPD5	PAP associated domain containing 5 [Source:HGNC Symbol;Acc:HGNC:30758]	1.8966	1.15062	0.721006		1.29879	1.15062	0.174754
ENSG00000198887	SMC5	structural maintenance of chromosomes 5 [Source:HGNC Symbol;Acc:HGNC:20465]	2.19669	1.33283	0.720841		1.10645	1.33283	-0.268555
ENSG00000198729	PPP1R14C	protein phosphatase 1, regulatory (inhibitor) subunit 14C [Source:HGNC Symbol;Acc:HGNC:14952]	1.71455	1.04035	0.720759		0.898153	1.04035	-0.212036
ENSG00000189362	NEMP2	nuclear envelope integral membrane protein 2 [Source:HGNC Symbol;Acc:HGNC:33700]	0.958196	0.581435	0.720703		0.536725	0.581435	-0.115434
ENSG00000100241	SBF1	SET binding factor 1 [Source:HGNC Symbol;Acc:HGNC:10542]	1.44839	0.878996	0.720523		0.980411	0.878996	0.15753
ENSG00000205084	TMEM231	transmembrane protein 231 [Source:HGNC Symbol;Acc:HGNC:37234]	0.895926	0.543969	0.719855		0.463086	0.543969	-0.232244
ENSG00000176148	TCP11L1	t-complex 11, testis-specific-like 1 [Source:HGNC Symbol;Acc:HGNC:25655]	1.37737	0.836366	0.719709		0.912477	0.836366	0.125654
ENSG00000182481	KPNA2	karyopherin alpha 2 (RAG cohort 1, importin alpha 1) [Source:HGNC Symbol;Acc:HGNC:6395]	2.6855	1.63075	0.719654		1.24795	1.63075	-0.385977
ENSG00000068137	PLEKHH3	pleckstrin homology domain containing, family H (with MyTH4 domain) member 3 [Source:HGNC Symbol;Acc:HGNC:26105]	3.77816	2.29456	0.719466		1.9941	2.29456	-0.202481
ENSG00000138757	G3BP2	GTPase activating protein (SH3 domain) binding protein 2 [Source:HGNC Symbol;Acc:HGNC:30291]	1.65146	1.00356	0.718609		0.83753	1.00356	-0.260918
ENSG00000118197	DDX59	DEAD (Asp-Glu-Ala-Asp) box polypeptide 59 [Source:HGNC Symbol;Acc:HGNC:25360]	0.909727	0.552828	0.718603		0.51843	0.552828	-0.0926813
ENSG00000175213	ZNF408	zinc finger protein 408 [Source:HGNC Symbol;Acc:HGNC:20041]	0.972573	0.591181	0.718208		0.815291	0.591181	0.463715
ENSG00000183735	TBK1	TANK-binding kinase 1 [Source:HGNC Symbol;Acc:HGNC:11584]	1.27203	0.773586	0.717499		0.97079	0.773586	0.327599
ENSG00000164024	METAP1	methionyl aminopeptidase 1 [Source:HGNC Symbol;Acc:HGNC:15789]	1.4748	0.89697	0.717383		0.747607	0.89697	-0.26278
ENSG00000170027	YWHAG	tyrosine 3-monooxygenase/tryptophan 5-monooxygenase activation protein, gamma [Source:HGNC Symbol;Acc:HGNC:12852]	1.62265	0.987603	0.716346		1.03451	0.987603	0.0669418
ENSG00000186318	BACE1	beta-site APP-cleaving enzyme 1 [Source:HGNC Symbol;Acc:HGNC:933]	0.98629	0.600356	0.716193		0.72313	0.600356	0.268435
ENSG00000171877	FRMD5	FERM domain containing 5 [Source:HGNC Symbol;Acc:HGNC:28214]	1.65598	1.00813	0.716006		1.11204	1.00813	0.141531
ENSG00000113595	TRIM23	tripartite motif containing 23 [Source:HGNC Symbol;Acc:HGNC:660]	0.946375	0.576237	0.715749		0.50921	0.576237	-0.178402
ENSG00000111711	GOLT1B	golgi transport 1B [Source:HGNC Symbol;Acc:HGNC:20175]	1.11177	0.677018	0.715592		0.753694	0.677018	0.154784
ENSG00000166451	CENPN	centromere protein N [Source:HGNC Symbol;Acc:HGNC:30873]	2.00803	1.22297	0.715387		0.855122	1.22297	-0.516189
ENSG00000139977	NAA30	N(alpha)-acetyltransferase 30, NatC catalytic subunit [Source:HGNC Symbol;Acc:HGNC:19844]	1.22664	0.74716	0.715229		0.745262	0.74716	-0.003668
ENSG00000134461	ANKRD16	ankyrin repeat domain 16 [Source:HGNC Symbol;Acc:HGNC:23471]	0.972508	0.592495	0.714906		0.808681	0.592495	0.448767
ENSG00000100056	DGCR14	DiGeorge syndrome critical region gene 14 [Source:HGNC Symbol;Acc:HGNC:16817]	1.081	0.658716	0.71464		0.695503	0.658716	0.0784002
ENSG00000104450	SPAG1	sperm associated antigen 1 [Source:HGNC Symbol;Acc:HGNC:11212]	1.11809	0.68135	0.714569		1.00359	0.68135	0.558703
ENSG00000198888	MT-ND1	mitochondrially encoded NADH dehydrogenase 1 [Source:HGNC Symbol;Acc:HGNC:7455]	1.20685	0.735648	0.714164		0.953111	0.735648	0.373629
ENSG00000123136	DDX39A	DEAD (Asp-Glu-Ala-Asp) box polypeptide 39A [Source:HGNC Symbol;Acc:HGNC:17821]	1.59073	0.969758	0.713997		0.745705	0.969758	-0.37902
ENSG00000110427	KIAA1549L	KIAA1549-like [Source:HGNC Symbol;Acc:HGNC:24836]	0.954263	0.581811	0.713837		0.669255	0.581811	0.202005
ENSG00000100156	SLC16A8	solute carrier family 16 (monocarboxylate transporter), member 8 [Source:HGNC Symbol;Acc:HGNC:16270]	0.897944	0.54776	0.71308		1.45085	0.54776	1.40528
ENSG00000103064	SLC7A6	solute carrier family 7 (amino acid transporter light chain, y+L system), member 6 [Source:HGNC Symbol;Acc:HGNC:11064]	1.36024	0.829802	0.713018		0.760496	0.829802	-0.125827
ENSG00000111670	GNPTAB	N-acetylglucosamine-1-phosphate transferase, alpha and beta subunits [Source:HGNC Symbol;Acc:HGNC:29670]	1.09691	0.669182	0.712975		0.733973	0.669182	0.133329
ENSG00000165526	RPUSD4	RNA pseudouridylate synthase domain containing 4 [Source:HGNC Symbol;Acc:HGNC:25898]	1.19267	0.72774	0.712695		0.670457	0.72774	-0.118279
ENSG00000144655	CSRNP1	cysteine-serine-rich nuclear protein 1 [Source:HGNC Symbol;Acc:HGNC:14300]	30.4216	18.5627	0.712691		23.9375	18.5627	0.366865
ENSG00000072071	ADGRL1	adhesion G protein-coupled receptor L1 [Source:HGNC Symbol;Acc:HGNC:20973]	1.48963	0.909772	0.711379		1.12111	0.909772	0.301345
ENSG00000164818	DNAAF5	dynein, axonemal, assembly factor 5 [Source:HGNC Symbol;Acc:HGNC:26013]	1.15831	0.707786	0.710642		0.664466	0.707786	-0.0911178
ENSG00000177463	NR2C2	nuclear receptor subfamily 2, group C, member 2 [Source:HGNC Symbol;Acc:HGNC:7972]	1.00705	0.615419	0.710499		0.887111	0.615419	0.527546
ENSG00000078747	ITCH	itchy E3 ubiquitin protein ligase [Source:HGNC Symbol;Acc:HGNC:13890]	1.13218	0.692083	0.710084		0.905356	0.692083	0.387541
ENSG00000163939	PBRM1	polybromo 1 [Source:HGNC Symbol;Acc:HGNC:30064]	1.35368	0.827536	0.70999		1.01203	0.827536	0.29036
ENSG00000078687	TNRC6C	trinucleotide repeat containing 6C [Source:HGNC Symbol;Acc:HGNC:29318]	1.11685	0.682903	0.709679		1.17883	0.682903	0.787607
ENSG00000076944	STXBP2	syntaxin binding protein 2 [Source:HGNC Symbol;Acc:HGNC:11445]	1.43492	0.877592	0.709353		0.848985	0.877592	-0.0478101
ENSG00000146414	SHPRH	SNF2 histone linker PHD RING helicase, E3 ubiquitin protein ligase [Source:HGNC Symbol;Acc:HGNC:19336]	0.827377	0.506123	0.709056		0.734242	0.506123	0.536766
ENSG00000197114	ZGPAT	zinc finger, CCCH-type with G patch domain [Source:HGNC Symbol;Acc:HGNC:15948]	1.14122	0.698172	0.70892		0.804215	0.698172	0.203998
ENSG00000081760	AACS	acetoacetyl-CoA synthetase [Source:HGNC Symbol;Acc:HGNC:21298]	1.21895	0.745887	0.708615		0.578669	0.745887	-0.366218
ENSG00000134294	SLC38A2	solute carrier family 38, member 2 [Source:HGNC Symbol;Acc:HGNC:13448]	3.78562	2.31668	0.708471		4.69854	2.31668	1.02015
ENSG00000179331	RAB39A	RAB39A, member RAS oncogene family [Source:HGNC Symbol;Acc:HGNC:16521]	2.3117	1.41476	0.708395		1.01155	1.41476	-0.48399
ENSG00000126970	ZC4H2	zinc finger, C4H2 domain containing [Source:HGNC Symbol;Acc:HGNC:24931]	0.959659	0.587352	0.708297		0.526452	0.587352	-0.157922
ENSG00000085415	SEH1L	SEH1-like nucleoporin [Source:HGNC Symbol;Acc:HGNC:30379]	1.60882	0.984861	0.708009		0.89384	0.984861	-0.139903
ENSG00000181904	C5orf24	chromosome 5 open reading frame 24 [Source:HGNC Symbol;Acc:HGNC:26746]	1.10632	0.677262	0.707982		0.805408	0.677262	0.250005
ENSG00000105355	PLIN3	perilipin 3 [Source:HGNC Symbol;Acc:HGNC:16893]	1.52574	0.934097	0.707861		0.630334	0.934097	-0.567455
ENSG00000118960	HS1BP3	HCLS1 binding protein 3 [Source:HGNC Symbol;Acc:HGNC:24979]	0.785387	0.480851	0.707814		0.596975	0.480851	0.312081
ENSG00000173598	NUDT4	nudix (nucleoside diphosphate linked moiety X)-type motif 4 [Source:HGNC Symbol;Acc:HGNC:8051]	1.89617	1.16102	0.707695		1.30376	1.16102	0.167291
ENSG00000171311	EXOSC1	exosome component 1 [Source:HGNC Symbol;Acc:HGNC:17286]	0.873461	0.534833	0.707654		0.606968	0.534833	0.182531
ENSG00000137814	HAUS2	HAUS augmin-like complex, subunit 2 [Source:HGNC Symbol;Acc:HGNC:25530]	1.39912	0.856771	0.707539		0.801033	0.856771	-0.0970479
ENSG00000119523	ALG2	ALG2, alpha-1,3/1,6-mannosyltransferase [Source:HGNC Symbol;Acc:HGNC:23159]	1.47538	0.903571	0.707381		1.02131	0.903571	0.176713
ENSG00000100416	TRMU	tRNA 5-methylaminomethyl-2-thiouridylate methyltransferase [Source:HGNC Symbol;Acc:HGNC:25481]	1.03646	0.635057	0.706705		0.505496	0.635057	-0.329185
ENSG00000165156	ZHX1	zinc fingers and homeoboxes 1 [Source:HGNC Symbol;Acc:HGNC:12871]	1.26337	0.774289	0.706333		0.804352	0.774289	0.0549555
ENSG00000169288	MRPL1	mitochondrial ribosomal protein L1 [Source:HGNC Symbol;Acc:HGNC:14275]	0.963967	0.590965	0.70591		0.693127	0.590965	0.230046
ENSG00000028528	SNX1	sorting nexin 1 [Source:HGNC Symbol;Acc:HGNC:11172]	1.22742	0.752644	0.705586		0.826664	0.752644	0.135334
ENSG00000157833	GAREML	GRB2 associated, regulator of MAPK1-like [Source:HGNC Symbol;Acc:HGNC:27172]	1.11962	0.686547	0.705576		1.18141	0.686547	0.783077
ENSG00000148291	SURF2	surfeit 2 [Source:HGNC Symbol;Acc:HGNC:11475]	1.36301	0.836152	0.704959		0.92107	0.836152	0.139545
ENSG00000148343	FAM73B	family with sequence similarity 73, member B [Source:HGNC Symbol;Acc:HGNC:23621]	1.12207	0.688423	0.704794		0.565212	0.688423	-0.284503
ENSG00000104331	IMPAD1	inositol monophosphatase domain containing 1 [Source:HGNC Symbol;Acc:HGNC:26019]	1.17358	0.720448	0.703957		0.916588	0.720448	0.347379
ENSG00000210191	MT-TL2	mitochondrially encoded tRNA leucine 2 (CUN) [Source:HGNC Symbol;Acc:HGNC:7491]	1.01627	0.62423	0.70313		0.745486	0.62423	0.256104
ENSG00000174953	DHX36	DEAH (Asp-Glu-Ala-His) box polypeptide 36 [Source:HGNC Symbol;Acc:HGNC:14410]	1.15436	0.709135	0.702958		0.795878	0.709135	0.166486
ENSG00000168439	STIP1	stress-induced phosphoprotein 1 [Source:HGNC Symbol;Acc:HGNC:11387]	1.51398	0.93017	0.702776		0.847654	0.93017	-0.134018
ENSG00000090975	PITPNM2	phosphatidylinositol transfer protein, membrane-associated 2 [Source:HGNC Symbol;Acc:HGNC:21044]	1.32112	0.811896	0.7024		0.81337	0.811896	0.00261678
ENSG00000135245	HILPDA	hypoxia inducible lipid droplet-associated [Source:HGNC Symbol;Acc:HGNC:28859]	0.884943	0.544056	0.701829		0.357	0.544056	-0.607832
ENSG00000196660	SLC30A10	solute carrier family 30, member 10 [Source:HGNC Symbol;Acc:HGNC:25355]	0.889154	0.546754	0.701541		0.508828	0.546754	-0.103714
ENSG00000125149	C16orf70	chromosome 16 open reading frame 70 [Source:HGNC Symbol;Acc:HGNC:29564]	1.14575	0.704795	0.701021		0.801233	0.704795	0.185019
ENSG00000182768	NGRN	neugrin, neurite outgrowth associated [Source:HGNC Symbol;Acc:HGNC:18077]	1.13831	0.700245	0.700965		0.796276	0.700245	0.185409
ENSG00000143847	PPFIA4	protein tyrosine phosphatase, receptor type, f polypeptide (PTPRF), interacting protein (liprin), alpha 4 [Source:HGNC Symbol;Acc:HGNC:9248]	1.36066	0.837323	0.700448		0.949785	0.837323	0.181817
ENSG00000167977	KCTD5	potassium channel tetramerization domain containing 5 [Source:HGNC Symbol;Acc:HGNC:21423]	0.852917	0.524953	0.700218		0.536046	0.524953	0.0301689
ENSG00000159128	IFNGR2	interferon gamma receptor 2 (interferon gamma transducer 1) [Source:HGNC Symbol;Acc:HGNC:5440]	1.21177	0.745874	0.700107		0.716651	0.745874	-0.0576618
ENSG00000204590	GNL1	guanine nucleotide binding protein-like 1 [Source:HGNC Symbol;Acc:HGNC:4413]	2.32487	1.43105	0.700077		1.34007	1.43105	-0.0947644
ENSG00000167110	GOLGA2	golgin A2 [Source:HGNC Symbol;Acc:HGNC:4425]	1.29649	0.7982	0.699788		0.768134	0.7982	-0.0553919
ENSG00000165322	ARHGAP12	Rho GTPase activating protein 12 [Source:HGNC Symbol;Acc:HGNC:16348]	1.30114	0.801132	0.699665		0.906957	0.801132	0.178994
ENSG00000120159	CAAP1	caspase activity and apoptosis inhibitor 1 [Source:HGNC Symbol;Acc:HGNC:25834]	0.742658	0.457329	0.699464		0.419308	0.457329	-0.125223
ENSG00000178385	PLEKHM3	pleckstrin homology domain containing, family M, member 3 [Source:HGNC Symbol;Acc:HGNC:34006]	1.11651	0.687584	0.699384		0.597632	0.687584	-0.202278
ENSG00000180537	RNF182	ring finger protein 182 [Source:HGNC Symbol;Acc:HGNC:28522]	2.20949	1.36081	0.699252		0.76579	1.36081	-0.829441
ENSG00000160408	ST6GALNAC6	ST6 (alpha-N-acetyl-neuraminyl-2,3-beta-galactosyl-1,3)-N-acetylgalactosaminide alpha-2,6-sialyltransferase 6 [Source:HGNC Symbol;Acc:HGNC:23364]	1.53144	0.943209	0.699241		0.768121	0.943209	-0.296244
ENSG00000126243	LRFN3	leucine rich repeat and fibronectin type III domain containing 3 [Source:HGNC Symbol;Acc:HGNC:28370]	0.851286	0.52435	0.699114		0.600044	0.52435	0.19454
ENSG00000182208	MOB2	MOB kinase activator 2 [Source:HGNC Symbol;Acc:HGNC:24904]	1.44214	0.888639	0.698539		0.805537	0.888639	-0.141646
ENSG00000210107	MT-TQ	mitochondrially encoded tRNA glutamine [Source:HGNC Symbol;Acc:HGNC:7495]	2.05748	1.2679	0.698436		0.758236	1.2679	-0.741723
ENSG00000087495	PHACTR3	phosphatase and actin regulator 3 [Source:HGNC Symbol;Acc:HGNC:15833]	1.69563	1.04526	0.697955		1.13853	1.04526	0.123313
ENSG00000125875	TBC1D20	TBC1 domain family, member 20 [Source:HGNC Symbol;Acc:HGNC:16133]	1.32906	0.819299	0.697948		1.01614	0.819299	0.310638
ENSG00000103148	NPRL3	NPR3-like, GATOR1 complex subunit [Source:HGNC Symbol;Acc:HGNC:14124]	0.960047	0.592016	0.69747		0.419279	0.592016	-0.497724
ENSG00000064313	TAF2	TAF2 RNA polymerase II, TATA box binding protein (TBP)-associated factor, 150kDa [Source:HGNC Symbol;Acc:HGNC:11536]	1.19151	0.734865	0.697241		0.858923	0.734865	0.225049
ENSG00000174576	NPAS4	neuronal PAS domain protein 4 [Source:HGNC Symbol;Acc:HGNC:18983]	161.056	99.4084	0.696125		370.915	99.4084	1.89965
ENSG00000152684	PELO	pelota homolog (Drosophila) [Source:HGNC Symbol;Acc:HGNC:8829]	1.45573	0.898594	0.696002		0.586463	0.898594	-0.615628
ENSG00000130508	PXDN	peroxidasin [Source:HGNC Symbol;Acc:HGNC:14966]	1.29036	0.796583	0.695873		0.981969	0.796583	0.301853
ENSG00000089050	RBBP9	retinoblastoma binding protein 9 [Source:HGNC Symbol;Acc:HGNC:9892]	0.780987	0.482173	0.695748		0.475511	0.482173	-0.0200737
ENSG00000141504	SAT2	spermidine/spermine N1-acetyltransferase family member 2 [Source:HGNC Symbol;Acc:HGNC:23160]	1.49436	0.922729	0.695549		0.71284	0.922729	-0.37233
ENSG00000183684	ALYREF	Aly/REF export factor [Source:HGNC Symbol;Acc:HGNC:19071]	2.02131	1.24811	0.695542		1.26351	1.24811	0.0176937
ENSG00000180817	PPA1	pyrophosphatase (inorganic) 1 [Source:HGNC Symbol;Acc:HGNC:9226]	1.45798	0.900325	0.695454		0.756144	0.900325	-0.251786
ENSG00000213672	NCKIPSD	NCK interacting protein with SH3 domain [Source:HGNC Symbol;Acc:HGNC:15486]	1.1079	0.684179	0.695386		0.615115	0.684179	-0.153518
ENSG00000160714	UBE2Q1	ubiquitin-conjugating enzyme E2Q family member 1 [Source:HGNC Symbol;Acc:HGNC:15698]	1.09984	0.679262	0.695253		0.675209	0.679262	-0.0086343
ENSG00000112078	KCTD20	potassium channel tetramerization domain containing 20 [Source:HGNC Symbol;Acc:HGNC:21052]	1.90067	1.17395	0.695143		1.14317	1.17395	-0.038327
ENSG00000119596	YLPM1	YLP motif containing 1 [Source:HGNC Symbol;Acc:HGNC:17798]	1.13262	0.699793	0.694667		0.879818	0.699793	0.330277
ENSG00000123575	FAM199X	family with sequence similarity 199, X-linked [Source:HGNC Symbol;Acc:HGNC:25195]	1.62989	1.00707	0.694606		0.837009	1.00707	-0.266852
ENSG00000112541	PDE10A	phosphodiesterase 10A [Source:HGNC Symbol;Acc:HGNC:8772]	1.65991	1.02579	0.694369		1.68862	1.02579	0.719108
ENSG00000273749	CYFIP1	cytoplasmic FMR1 interacting protein 1 [Source:HGNC Symbol;Acc:HGNC:13759]	1.18158	0.730333	0.694088		0.732792	0.730333	0.00484928
ENSG00000033170	FUT8	fucosyltransferase 8 (alpha (1,6) fucosyltransferase) [Source:HGNC Symbol;Acc:HGNC:4019]	0.987407	0.610431	0.693816		0.812799	0.610431	0.413069
ENSG00000154118	JPH3	junctophilin 3 [Source:HGNC Symbol;Acc:HGNC:14203]	1.29934	0.803386	0.693608		0.805068	0.803386	0.00301669
ENSG00000105063	PPP6R1	protein phosphatase 6, regulatory subunit 1 [Source:HGNC Symbol;Acc:HGNC:29195]	1.62825	1.00682	0.693521		1.00775	1.00682	0.00133143
ENSG00000167136	ENDOG	endonuclease G [Source:HGNC Symbol;Acc:HGNC:3346]	1.11415	0.689219	0.692913		0.516833	0.689219	-0.415265
ENSG00000132361	CLUH	clustered mitochondria (cluA/CLU1) homolog [Source:HGNC Symbol;Acc:HGNC:29094]	1.18665	0.734068	0.692905		0.65301	0.734068	-0.168807
ENSG00000176171	BNIP3	BCL2/adenovirus E1B 19kDa interacting protein 3 [Source:HGNC Symbol;Acc:HGNC:1084]	1.61269	0.997622	0.692902		0.989948	0.997622	-0.0111397
ENSG00000185670	ZBTB3	zinc finger and BTB domain containing 3 [Source:HGNC Symbol;Acc:HGNC:22918]	0.295254	0.1827	0.692485		0.222087	0.1827	0.281654
ENSG00000164610	RP9	retinitis pigmentosa 9 (autosomal dominant) [Source:HGNC Symbol;Acc:HGNC:10288]	1.37661	0.852148	0.691945		0.803637	0.852148	-0.0845611
ENSG00000184307	ZDHHC23	zinc finger, DHHC-type containing 23 [Source:HGNC Symbol;Acc:HGNC:28654]	0.756179	0.468097	0.691919		0.532786	0.468097	0.186748
ENSG00000167491	GATAD2A	GATA zinc finger domain containing 2A [Source:HGNC Symbol;Acc:HGNC:29989]	1.6412	1.01601	0.691831		0.915683	1.01601	-0.150001
ENSG00000120868	APAF1	apoptotic peptidase activating factor 1 [Source:HGNC Symbol;Acc:HGNC:576]	1.12938	0.699198	0.691763		0.838675	0.699198	0.262411
ENSG00000143156	NME7	NME/NM23 family member 7 [Source:HGNC Symbol;Acc:HGNC:20461]	1.17571	0.728055	0.69141		0.66892	0.728055	-0.122213
ENSG00000173611	SCAI	suppressor of cancer cell invasion [Source:HGNC Symbol;Acc:HGNC:26709]	1.24873	0.773394	0.691192		0.999827	0.773394	0.370476
ENSG00000100603	SNW1	SNW domain containing 1 [Source:HGNC Symbol;Acc:HGNC:16696]	1.28943	0.798666	0.691064		0.929302	0.798666	0.218555
ENSG00000107929	LARP4B	La ribonucleoprotein domain family, member 4B [Source:HGNC Symbol;Acc:HGNC:28987]	1.24345	0.770312	0.690833		0.930822	0.770312	0.273063
ENSG00000116396	KCNC4	potassium channel, voltage gated Shaw related subfamily C, member 4 [Source:HGNC Symbol;Acc:HGNC:6236]	1.09548	0.678705	0.690711		4.93544	0.678705	2.86232
ENSG00000109466	KLHL2	kelch-like family member 2 [Source:HGNC Symbol;Acc:HGNC:6353]	1.48831	0.922442	0.690146		0.830581	0.922442	-0.151336
ENSG00000130881	LRP3	low density lipoprotein receptor-related protein 3 [Source:HGNC Symbol;Acc:HGNC:6695]	1.44924	0.898309	0.690012		1.01653	0.898309	0.178369
ENSG00000153395	LPCAT1	lysophosphatidylcholine acyltransferase 1 [Source:HGNC Symbol;Acc:HGNC:25718]	1.19389	0.740169	0.689748		0.608378	0.740169	-0.282888
ENSG00000165886	UBTD1	ubiquitin domain containing 1 [Source:HGNC Symbol;Acc:HGNC:25683]	1.96213	1.21649	0.689701		1.11227	1.21649	-0.129214
ENSG00000140577	CRTC3	CREB regulated transcription coactivator 3 [Source:HGNC Symbol;Acc:HGNC:26148]	1.21428	0.753082	0.689224		0.944506	0.753082	0.326753
ENSG00000130956	HABP4	hyaluronan binding protein 4 [Source:HGNC Symbol;Acc:HGNC:17062]	1.79307	1.11206	0.689198		1.114	1.11206	0.00251995
ENSG00000119900	OGFRL1	opioid growth factor receptor-like 1 [Source:HGNC Symbol;Acc:HGNC:21378]	1.01129	0.627243	0.689104		0.599006	0.627243	-0.0664536
ENSG00000131061	ZNF341	zinc finger protein 341 [Source:HGNC Symbol;Acc:HGNC:15992]	0.554831	0.344153	0.688999		0.437037	0.344153	0.344708
ENSG00000105321	CCDC9	coiled-coil domain containing 9 [Source:HGNC Symbol;Acc:HGNC:24560]	1.75195	1.08675	0.68894		1.45693	1.08675	0.422909
ENSG00000116957	TBCE	tubulin folding cofactor E [Source:HGNC Symbol;Acc:HGNC:11582]	1.06018	0.657656	0.6889		0.951114	0.657656	0.532286
ENSG00000030110	BAK1	BCL2-antagonist/killer 1 [Source:HGNC Symbol;Acc:HGNC:949]	1.70023	1.05496	0.688551		0.873979	1.05496	-0.271511
ENSG00000277258	PCGF2	polycomb group ring finger 2 [Source:HGNC Symbol;Acc:HGNC:12929]	1.25345	0.777884	0.688272		0.756805	0.777884	-0.0396348
ENSG00000177426	TGIF1	TGFB-induced factor homeobox 1 [Source:HGNC Symbol;Acc:HGNC:11776]	3.3431	2.07477	0.688235		1.53652	2.07477	-0.433284
ENSG00000102886	GDPD3	glycerophosphodiester phosphodiesterase domain containing 3 [Source:HGNC Symbol;Acc:HGNC:28638]	1.80224	1.11859	0.688111		1.26855	1.11859	0.181493
ENSG00000159267	HLCS	holocarboxylase synthetase (biotin-(proprionyl-CoA-carboxylase (ATP-hydrolysing)) ligase) [Source:HGNC Symbol;Acc:HGNC:4976]	0.691168	0.429019	0.687995		0.450762	0.429019	0.0713256
ENSG00000144645	OSBPL10	oxysterol binding protein-like 10 [Source:HGNC Symbol;Acc:HGNC:16395]	1.49352	0.927295	0.687616		1.73573	0.927295	0.904443
ENSG00000161011	SQSTM1	sequestosome 1 [Source:HGNC Symbol;Acc:HGNC:11280]	2.31614	1.43806	0.687594		1.49433	1.43806	0.0553721
ENSG00000102053	ZC3H12B	zinc finger CCCH-type containing 12B [Source:HGNC Symbol;Acc:HGNC:17407]	1.3004	0.807428	0.687546		1.09963	0.807428	0.445607
ENSG00000185838	GNB1L	guanine nucleotide binding protein (G protein), beta polypeptide 1-like [Source:HGNC Symbol;Acc:HGNC:4397]	1.34409	0.834584	0.687502		0.619012	0.834584	-0.431089
ENSG00000148337	CIZ1	CDKN1A interacting zinc finger protein 1 [Source:HGNC Symbol;Acc:HGNC:16744]	1.21625	0.755255	0.687405		0.737653	0.755255	-0.0340215
ENSG00000187051	RPS19BP1	ribosomal protein S19 binding protein 1 [Source:HGNC Symbol;Acc:HGNC:28749]	1.53707	0.954487	0.687384		0.777548	0.954487	-0.295793
ENSG00000090520	DNAJB11	DnaJ (Hsp40) homolog, subfamily B, member 11 [Source:HGNC Symbol;Acc:HGNC:14889]	1.64569	1.022	0.687305		0.936889	1.022	-0.125439
ENSG00000108963	DPH1	diphthamide biosynthesis 1 [Source:HGNC Symbol;Acc:HGNC:3003]	0.807837	0.501685	0.687281		0.69594	0.501685	0.472179
ENSG00000126217	MCF2L	MCF.2 cell line derived transforming sequence-like [Source:HGNC Symbol;Acc:HGNC:14576]	0.84219	0.52306	0.687169		0.587031	0.52306	0.16646
ENSG00000100220	RTCB	RNA 2',3'-cyclic phosphate and 5'-OH ligase [Source:HGNC Symbol;Acc:HGNC:26935]	1.47996	0.919194	0.687119		0.766513	0.919194	-0.262059
ENSG00000185803	SLC52A2	solute carrier family 52 (riboflavin transporter), member 2 [Source:HGNC Symbol;Acc:HGNC:30224]	1.1395	0.707752	0.687087		0.458357	0.707752	-0.626772
ENSG00000066117	SMARCD1	SWI/SNF related, matrix associated, actin dependent regulator of chromatin, subfamily d, member 1 [Source:HGNC Symbol;Acc:HGNC:11106]	0.828603	0.51467	0.687033		0.69321	0.51467	0.429645
ENSG00000167106	FAM102A	family with sequence similarity 102, member A [Source:HGNC Symbol;Acc:HGNC:31419]	1.43759	0.892944	0.687009		0.737994	0.892944	-0.274961
ENSG00000123643	SLC36A1	solute carrier family 36 (proton/amino acid symporter), member 1 [Source:HGNC Symbol;Acc:HGNC:18761]	1.02414	0.636279	0.686678		0.72067	0.636279	0.179679
ENSG00000188895	MSL1	male-specific lethal 1 homolog (Drosophila) [Source:HGNC Symbol;Acc:HGNC:27905]	1.57743	0.98006	0.686633		1.06278	0.98006	0.116899
ENSG00000133065	SLC41A1	solute carrier family 41 (magnesium transporter), member 1 [Source:HGNC Symbol;Acc:HGNC:19429]	1.87773	1.16685	0.686367		1.04553	1.16685	-0.158392
ENSG00000064300	NGFR	nerve growth factor receptor [Source:HGNC Symbol;Acc:HGNC:7809]	1.41572	0.879809	0.686277		0.551837	0.879809	-0.672947
ENSG00000159459	UBR1	ubiquitin protein ligase E3 component n-recognin 1 [Source:HGNC Symbol;Acc:HGNC:16808]	1.05908	0.658189	0.686232		0.692338	0.658189	0.0729742
ENSG00000009335	UBE3C	ubiquitin protein ligase E3C [Source:HGNC Symbol;Acc:HGNC:16803]	1.31429	0.816927	0.686007		0.78425	0.816927	-0.0588938
ENSG00000196976	LAGE3	L antigen family, member 3 [Source:HGNC Symbol;Acc:HGNC:26058]	1.5525	0.965084	0.685869		0.62261	0.965084	-0.632325
ENSG00000151729	SLC25A4	solute carrier family 25 (mitochondrial carrier; adenine nucleotide translocator), member 4 [Source:HGNC Symbol;Acc:HGNC:10990]	1.65396	1.02848	0.685414		1.0184	1.02848	-0.0142115
ENSG00000169564	PCBP1	poly(rC) binding protein 1 [Source:HGNC Symbol;Acc:HGNC:8647]	1.18846	0.739181	0.685098		0.821152	0.739181	0.151723
ENSG00000175764	TTLL11	tubulin tyrosine ligase-like family member 11 [Source:HGNC Symbol;Acc:HGNC:18113]	1.29009	0.802499	0.684905		0.586674	0.802499	-0.451941
ENSG00000171206	TRIM8	tripartite motif containing 8 [Source:HGNC Symbol;Acc:HGNC:15579]	1.49337	0.929264	0.684415		1.04909	0.929264	0.174983
ENSG00000121579	NAA50	N(alpha)-acetyltransferase 50, NatE catalytic subunit [Source:HGNC Symbol;Acc:HGNC:29533]	1.70712	1.06266	0.68388		1.057	1.06266	-0.0077101
ENSG00000166266	CUL5	cullin 5 [Source:HGNC Symbol;Acc:HGNC:2556]	0.969805	0.603729	0.683794		0.71153	0.603729	0.237024
ENSG00000111913	FAM65B	family with sequence similarity 65, member B [Source:HGNC Symbol;Acc:HGNC:13872]	1.40082	0.872095	0.683716		0.970599	0.872095	0.154391
ENSG00000124802	EEF1E1	eukaryotic translation elongation factor 1 epsilon 1 [Source:HGNC Symbol;Acc:HGNC:3212]	1.1145	0.693877	0.683641		0.621364	0.693877	-0.15924
ENSG00000157933	SKI	SKI proto-oncogene [Source:HGNC Symbol;Acc:HGNC:10896]	1.9217	1.19645	0.683629		1.36644	1.19645	0.191671
ENSG00000144741	SLC25A26	solute carrier family 25 (S-adenosylmethionine carrier), member 26 [Source:HGNC Symbol;Acc:HGNC:20661]	1.0185	0.634218	0.683396		0.653185	0.634218	0.0425141
ENSG00000080854	IGSF9B	immunoglobulin superfamily, member 9B [Source:HGNC Symbol;Acc:HGNC:32326]	2.5243	1.57215	0.683144		1.3135	1.57215	-0.259323
ENSG00000108100	CCNY	cyclin Y [Source:HGNC Symbol;Acc:HGNC:23354]	1.30371	0.812229	0.682666		0.848079	0.812229	0.0623126
ENSG00000119707	RBM25	RNA binding motif protein 25 [Source:HGNC Symbol;Acc:HGNC:23244]	1.26894	0.790588	0.682629		1.01899	0.790588	0.366139
ENSG00000247596	TWF2	twinfilin actin binding protein 2 [Source:HGNC Symbol;Acc:HGNC:9621]	0.801899	0.499637	0.682539		0.469522	0.499637	-0.0896871
ENSG00000077514	POLD3	polymerase (DNA-directed), delta 3, accessory subunit [Source:HGNC Symbol;Acc:HGNC:20932]	1.26516	0.789057	0.68112		0.865767	0.789057	0.13385
ENSG00000137500	CCDC90B	coiled-coil domain containing 90B [Source:HGNC Symbol;Acc:HGNC:28108]	0.769705	0.480097	0.680981		0.438132	0.480097	-0.13196
ENSG00000110811	P3H3	prolyl 3-hydroxylase 3 [Source:HGNC Symbol;Acc:HGNC:19318]	1.53133	0.955257	0.680825		0.782687	0.955257	-0.287453
ENSG00000111790	FGFR1OP2	FGFR1 oncogene partner 2 [Source:HGNC Symbol;Acc:HGNC:23098]	1.39873	0.872762	0.680455		0.900759	0.872762	0.0455533
ENSG00000153574	RPIA	ribose 5-phosphate isomerase A [Source:HGNC Symbol;Acc:HGNC:10297]	1.21639	0.759004	0.680425		0.846557	0.759004	0.157499
ENSG00000099999	RNF215	ring finger protein 215 [Source:HGNC Symbol;Acc:HGNC:33434]	0.722186	0.45082	0.679818		0.440658	0.45082	-0.0328927
ENSG00000163681	SLMAP	sarcolemma associated protein [Source:HGNC Symbol;Acc:HGNC:16643]	1.22487	0.764653	0.679756		0.937628	0.764653	0.29421
ENSG00000274180	NATD1	N-acetyltransferase domain containing 1 [Source:HGNC Symbol;Acc:HGNC:30770]	1.04428	0.652107	0.679325		0.703224	0.652107	0.108876
ENSG00000198961	PJA2	praja ring finger 2, E3 ubiquitin protein ligase [Source:HGNC Symbol;Acc:HGNC:17481]	1.2828	0.801062	0.679308		0.810303	0.801062	0.0165481
ENSG00000114098	ARMC8	armadillo repeat containing 8 [Source:HGNC Symbol;Acc:HGNC:24999]	1.23613	0.771983	0.67919		0.792977	0.771983	0.0387102
ENSG00000108306	FBXL20	F-box and leucine-rich repeat protein 20 [Source:HGNC Symbol;Acc:HGNC:24679]	1.16126	0.725282	0.67908		0.917934	0.725282	0.339849
ENSG00000035681	NSMAF	neutral sphingomyelinase (N-SMase) activation associated factor [Source:HGNC Symbol;Acc:HGNC:8017]	1.29115	0.806463	0.678973		0.856926	0.806463	0.0875627
ENSG00000104142	VPS18	vacuolar protein sorting 18 homolog (S. cerevisiae) [Source:HGNC Symbol;Acc:HGNC:15972]	1.51721	0.94776	0.678832		0.924376	0.94776	-0.0360412
ENSG00000148384	INPP5E	inositol polyphosphate-5-phosphatase, 72 kDa [Source:HGNC Symbol;Acc:HGNC:21474]	1.12448	0.702608	0.678471		0.747817	0.702608	0.0899648
ENSG00000157036	EXOG	endo/exonuclease (5'-3'), endonuclease G-like [Source:HGNC Symbol;Acc:HGNC:3347]	1.1323	0.707596	0.678261		0.624902	0.707596	-0.179297
ENSG00000120324	PCDHB10	protocadherin beta 10 [Source:HGNC Symbol;Acc:HGNC:8681]	1.27998	0.799895	0.678234		1.18532	0.799895	0.567387
ENSG00000143126	CELSR2	cadherin, EGF LAG seven-pass G-type receptor 2 [Source:HGNC Symbol;Acc:HGNC:3231]	1.00529	0.628303	0.678073		0.80915	0.628303	0.364946
ENSG00000171928	TVP23B	trans-golgi network vesicle protein 23 homolog B (S. cerevisiae) [Source:HGNC Symbol;Acc:HGNC:20399]	1.08993	0.681275	0.677929		0.637017	0.681275	-0.0969059
ENSG00000074071	MRPS34	mitochondrial ribosomal protein S34 [Source:HGNC Symbol;Acc:HGNC:16618]	1.20042	0.750426	0.677753		1.0184	0.750426	0.440525
ENSG00000204227	RING1	ring finger protein 1 [Source:HGNC Symbol;Acc:HGNC:10018]	0.967887	0.605109	0.677644		0.498339	0.605109	-0.280069
ENSG00000173065	FAM222B	family with sequence similarity 222, member B [Source:HGNC Symbol;Acc:HGNC:25563]	1.21154	0.75758	0.677373		0.900814	0.75758	0.249832
ENSG00000097033	SH3GLB1	SH3-domain GRB2-like endophilin B1 [Source:HGNC Symbol;Acc:HGNC:10833]	1.46525	0.916244	0.677343		1.01845	0.916244	0.152574
ENSG00000117475	BLZF1	basic leucine zipper nuclear factor 1 [Source:HGNC Symbol;Acc:HGNC:1065]	1.32384	0.827844	0.677296		0.73286	0.827844	-0.175821
ENSG00000137266	SLC22A23	solute carrier family 22, member 23 [Source:HGNC Symbol;Acc:HGNC:21106]	1.35386	0.84677	0.677034		1.02686	0.84677	0.2782
ENSG00000003249	DBNDD1	dysbindin (dystrobrevin binding protein 1) domain containing 1 [Source:HGNC Symbol;Acc:HGNC:28455]	1.30581	0.81673	0.677011		0.475088	0.81673	-0.781664
ENSG00000163605	PPP4R2	protein phosphatase 4, regulatory subunit 2 [Source:HGNC Symbol;Acc:HGNC:18296]	1.55479	0.972532	0.676906		1.37678	0.972532	0.501484
ENSG00000118503	TNFAIP3	tumor necrosis factor, alpha-induced protein 3 [Source:HGNC Symbol;Acc:HGNC:11896]	2.32059	1.45168	0.676767		2.32155	1.45168	0.677365
ENSG00000132388	UBE2G1	ubiquitin-conjugating enzyme E2G 1 [Source:HGNC Symbol;Acc:HGNC:12482]	1.75134	1.09593	0.676307		0.825823	1.09593	-0.408246
ENSG00000134698	AGO4	argonaute RISC catalytic component 4 [Source:HGNC Symbol;Acc:HGNC:18424]	1.01187	0.63333	0.676001		0.677919	0.63333	0.0981574
ENSG00000131437	KIF3A	kinesin family member 3A [Source:HGNC Symbol;Acc:HGNC:6319]	1.377	0.861911	0.675919		0.875192	0.861911	0.0220609
ENSG00000136152	COG3	component of oligomeric golgi complex 3 [Source:HGNC Symbol;Acc:HGNC:18619]	0.937439	0.587193	0.67489		0.690675	0.587193	0.234172
ENSG00000166529	ZSCAN21	zinc finger and SCAN domain containing 21 [Source:HGNC Symbol;Acc:HGNC:13104]	0.762653	0.477879	0.674381		0.593711	0.477879	0.313115
ENSG00000135968	GCC2	GRIP and coiled-coil domain containing 2 [Source:HGNC Symbol;Acc:HGNC:23218]	0.924829	0.5795	0.674377		0.57318	0.5795	-0.0158215
ENSG00000151849	CENPJ	centromere protein J [Source:HGNC Symbol;Acc:HGNC:17272]	0.809529	0.507258	0.674363		0.62926	0.507258	0.310935
ENSG00000163875	MEAF6	MYST/Esa1-associated factor 6 [Source:HGNC Symbol;Acc:HGNC:25674]	1.40087	0.877878	0.674231		0.815514	0.877878	-0.106311
ENSG00000213160	KLHL23	kelch-like family member 23 [Source:HGNC Symbol;Acc:HGNC:27506]	1.64382	1.03028	0.67402		0.971736	1.03028	-0.0843933
ENSG00000144827	ABHD10	abhydrolase domain containing 10 [Source:HGNC Symbol;Acc:HGNC:25656]	0.86309	0.540971	0.673961		0.553458	0.540971	0.0329241
ENSG00000215271	HOMEZ	homeobox and leucine zipper encoding [Source:HGNC Symbol;Acc:HGNC:20164]	0.459552	0.288065	0.673835		0.347336	0.288065	0.269937
ENSG00000101193	GID8	GID complex subunit 8 [Source:HGNC Symbol;Acc:HGNC:15857]	0.99265	0.622415	0.673408		0.543225	0.622415	-0.196329
ENSG00000163877	SNIP1	Smad nuclear interacting protein 1 [Source:HGNC Symbol;Acc:HGNC:30587]	1.10956	0.695785	0.673276		0.875559	0.695785	0.331564
ENSG00000006576	PHTF2	putative homeodomain transcription factor 2 [Source:HGNC Symbol;Acc:HGNC:13411]	1.458	0.914361	0.673159		0.87648	0.914361	-0.0610421
ENSG00000116793	PHTF1	putative homeodomain transcription factor 1 [Source:HGNC Symbol;Acc:HGNC:8939]	1.03076	0.646574	0.672819		0.761195	0.646574	0.235451
ENSG00000210196	MT-TP	mitochondrially encoded tRNA proline [Source:HGNC Symbol;Acc:HGNC:7494]	1.32058	0.828433	0.67271		0.836894	0.828433	0.014659
ENSG00000166860	ZBTB39	zinc finger and BTB domain containing 39 [Source:HGNC Symbol;Acc:HGNC:29014]	0.698655	0.438344	0.672517		0.60564	0.438344	0.466397
ENSG00000166133	RPUSD2	RNA pseudouridylate synthase domain containing 2 [Source:HGNC Symbol;Acc:HGNC:24180]	0.569825	0.35764	0.672013		0.568169	0.35764	0.667814
ENSG00000100711	ZFYVE21	zinc finger, FYVE domain containing 21 [Source:HGNC Symbol;Acc:HGNC:20760]	0.870864	0.546664	0.671794		0.814429	0.546664	0.575134
ENSG00000119725	ZNF410	zinc finger protein 410 [Source:HGNC Symbol;Acc:HGNC:20144]	1.46956	0.922503	0.671754		0.861931	0.922503	-0.0979811
ENSG00000074047	GLI2	GLI family zinc finger 2 [Source:HGNC Symbol;Acc:HGNC:4318]	1.15881	0.727773	0.671083		1.3446	0.727773	0.885618
ENSG00000170632	ARMC10	armadillo repeat containing 10 [Source:HGNC Symbol;Acc:HGNC:21706]	0.937167	0.588629	0.670946		0.518877	0.588629	-0.181966
ENSG00000171604	CXXC5	CXXC finger protein 5 [Source:HGNC Symbol;Acc:HGNC:26943]	1.33971	0.841473	0.670933		1.01262	0.841473	0.267106
ENSG00000139998	RAB15	RAB15, member RAS oncogene family [Source:HGNC Symbol;Acc:HGNC:20150]	1.40424	0.882082	0.67081		0.702013	0.882082	-0.329415
ENSG00000122729	ACO1	aconitase 1, soluble [Source:HGNC Symbol;Acc:HGNC:117]	1.1222	0.705141	0.670348		0.697189	0.705141	-0.0163608
ENSG00000168137	SETD5	SET domain containing 5 [Source:HGNC Symbol;Acc:HGNC:25566]	1.18169	0.742796	0.669808		0.862399	0.742796	0.21539
ENSG00000165185	KIAA1958	KIAA1958 [Source:HGNC Symbol;Acc:HGNC:23427]	1.72627	1.08538	0.669459		1.00776	1.08538	-0.107046
ENSG00000141428	C18orf21	chromosome 18 open reading frame 21 [Source:HGNC Symbol;Acc:HGNC:28802]	1.00526	0.632074	0.669406		0.526879	0.632074	-0.262621
ENSG00000214357	NEURL1B	neuralized E3 ubiquitin protein ligase 1B [Source:HGNC Symbol;Acc:HGNC:35422]	0.779362	0.490071	0.669302		0.544277	0.490071	0.151349
ENSG00000143970	ASXL2	additional sex combs like transcriptional regulator 2 [Source:HGNC Symbol;Acc:HGNC:23805]	1.41215	0.888156	0.669012		1.23009	0.888156	0.469883
ENSG00000159069	FBXW5	F-box and WD repeat domain containing 5 [Source:HGNC Symbol;Acc:HGNC:13613]	1.36419	0.858245	0.66858		0.695828	0.858245	-0.302658
ENSG00000205213	LGR4	leucine-rich repeat containing G protein-coupled receptor 4 [Source:HGNC Symbol;Acc:HGNC:13299]	1.15342	0.725906	0.668069		1.01135	0.725906	0.478423
ENSG00000274211	SOCS7	suppressor of cytokine signaling 7 [Source:HGNC Symbol;Acc:HGNC:29846]	1.8776	1.18179	0.667912		1.52553	1.18179	0.368334
ENSG00000071539	TRIP13	thyroid hormone receptor interactor 13 [Source:HGNC Symbol;Acc:HGNC:12307]	1.04187	0.65581	0.667827		0.493827	0.65581	-0.409272
ENSG00000176208	ATAD5	ATPase family, AAA domain containing 5 [Source:HGNC Symbol;Acc:HGNC:25752]	0.977496	0.615383	0.667606		0.813103	0.615383	0.401953
ENSG00000197747	S100A10	S100 calcium binding protein A10 [Source:HGNC Symbol;Acc:HGNC:10487]	1.66235	1.04654	0.667603		1.05048	1.04654	0.00543203
ENSG00000159596	TMEM69	transmembrane protein 69 [Source:HGNC Symbol;Acc:HGNC:28035]	0.629735	0.396526	0.667331		0.256012	0.396526	-0.6312
ENSG00000135622	SEMA4F	sema domain, immunoglobulin domain (Ig), transmembrane domain (TM) and short cytoplasmic domain, (semaphorin) 4F [Source:HGNC Symbol;Acc:HGNC:10734]	1.01267	0.637673	0.667278		0.510326	0.637673	-0.321397
ENSG00000120327	PCDHB14	protocadherin beta 14 [Source:HGNC Symbol;Acc:HGNC:8685]	1.30456	0.821507	0.667213		1.08711	0.821507	0.404157
ENSG00000144381	HSPD1	heat shock 60kDa protein 1 (chaperonin) [Source:HGNC Symbol;Acc:HGNC:5261]	1.50602	0.94858	0.6669		0.922198	0.94858	-0.0406927
ENSG00000109911	ELP4	elongator acetyltransferase complex subunit 4 [Source:HGNC Symbol;Acc:HGNC:1171]	1.00386	0.632376	0.666705		0.724825	0.632376	0.196849
ENSG00000148296	SURF6	surfeit 6 [Source:HGNC Symbol;Acc:HGNC:11478]	0.801791	0.505094	0.666675		0.537716	0.505094	0.0902922
ENSG00000077232	DNAJC10	DnaJ (Hsp40) homolog, subfamily C, member 10 [Source:HGNC Symbol;Acc:HGNC:24637]	0.900783	0.567503	0.666552		0.540792	0.567503	-0.0695543
ENSG00000183723	CMTM4	CKLF-like MARVEL transmembrane domain containing 4 [Source:HGNC Symbol;Acc:HGNC:19175]	1.34268	0.845915	0.666526		1.04196	0.845915	0.300716
ENSG00000167625	ZNF526	zinc finger protein 526 [Source:HGNC Symbol;Acc:HGNC:29415]	0.662746	0.417603	0.666326		0.657268	0.417603	0.654351
ENSG00000165688	PMPCA	peptidase (mitochondrial processing) alpha [Source:HGNC Symbol;Acc:HGNC:18667]	1.46803	0.925377	0.665767		0.938422	0.925377	0.0201964
ENSG00000130935	NOL11	nucleolar protein 11 [Source:HGNC Symbol;Acc:HGNC:24557]	0.990685	0.624571	0.665559		0.601305	0.624571	-0.0547691
ENSG00000122591	FAM126A	family with sequence similarity 126, member A [Source:HGNC Symbol;Acc:HGNC:24587]	1.9747	1.24506	0.665423		0.924484	1.24506	-0.429491
ENSG00000108587	GOSR1	golgi SNAP receptor complex member 1 [Source:HGNC Symbol;Acc:HGNC:4430]	0.658611	0.415278	0.66535		0.646341	0.415278	0.638219
ENSG00000100084	HIRA	histone cell cycle regulator [Source:HGNC Symbol;Acc:HGNC:4916]	1.28289	0.80907	0.665065		0.866171	0.80907	0.0983868
ENSG00000120071	KANSL1	KAT8 regulatory NSL complex subunit 1 [Source:HGNC Symbol;Acc:HGNC:24565]	1.08348	0.683312	0.665061		0.954591	0.683312	0.482339
ENSG00000006695	COX10	COX10 heme A:farnesyltransferase cytochrome c oxidase assembly factor [Source:HGNC Symbol;Acc:HGNC:2260]	1.09444	0.690308	0.664883		0.754666	0.690308	0.128597
ENSG00000124313	IQSEC2	IQ motif and Sec7 domain 2 [Source:HGNC Symbol;Acc:HGNC:29059]	1.45372	0.917058	0.664666		0.969271	0.917058	0.0798873
ENSG00000154001	PPP2R5E	protein phosphatase 2, regulatory subunit B', epsilon isoform [Source:HGNC Symbol;Acc:HGNC:9313]	1.38271	0.87234	0.664537		0.969344	0.87234	0.152117
ENSG00000144057	ST6GAL2	ST6 beta-galactosamide alpha-2,6-sialyltranferase 2 [Source:HGNC Symbol;Acc:HGNC:10861]	0.662912	0.418323	0.664199		0.486336	0.418323	0.217335
ENSG00000197785	ATAD3A	ATPase family, AAA domain containing 3A [Source:HGNC Symbol;Acc:HGNC:25567]	1.26175	0.796295	0.664056		0.860154	0.796295	0.111291
ENSG00000196455	PIK3R4	phosphoinositide-3-kinase, regulatory subunit 4 [Source:HGNC Symbol;Acc:HGNC:8982]	0.922065	0.581925	0.664036		0.714736	0.581925	0.296577
ENSG00000125944	HNRNPR	heterogeneous nuclear ribonucleoprotein R [Source:HGNC Symbol;Acc:HGNC:5047]	1.31476	0.829829	0.66391		0.861675	0.829829	0.0543304
ENSG00000138867	GUCD1	guanylyl cyclase domain containing 1 [Source:HGNC Symbol;Acc:HGNC:14237]	0.674857	0.425951	0.663894		0.506258	0.425951	0.249185
ENSG00000067533	RRP15	ribosomal RNA processing 15 homolog [Source:HGNC Symbol;Acc:HGNC:24255]	1.07407	0.678068	0.663584		0.826258	0.678068	0.285162
ENSG00000102870	ZNF629	zinc finger protein 629 [Source:HGNC Symbol;Acc:HGNC:29008]	0.736093	0.464785	0.663325		0.708839	0.464785	0.608895
ENSG00000241697	TMEFF1	transmembrane protein with EGF-like and two follistatin-like domains 1 [Source:HGNC Symbol;Acc:HGNC:11866]	1.52016	0.960079	0.662999		1.09129	0.960079	0.184815
ENSG00000162004	CCDC78	coiled-coil domain containing 78 [Source:HGNC Symbol;Acc:HGNC:14153]	0.851514	0.537965	0.662518		0.885654	0.537965	0.719231
ENSG00000203485	INF2	inverted formin, FH2 and WH2 domain containing [Source:HGNC Symbol;Acc:HGNC:23791]	1.23191	0.778304	0.66249		0.838235	0.778304	0.10702
ENSG00000110851	PRDM4	PR domain containing 4 [Source:HGNC Symbol;Acc:HGNC:9348]	1.63075	1.03036	0.662389		0.833997	1.03036	-0.305032
ENSG00000032742	IFT88	intraflagellar transport 88 [Source:HGNC Symbol;Acc:HGNC:20606]	0.860451	0.543802	0.662013		0.63271	0.543802	0.218463
ENSG00000116954	RRAGC	Ras-related GTP binding C [Source:HGNC Symbol;Acc:HGNC:19902]	1.94052	1.2266	0.661778		1.24938	1.2266	0.0265454
ENSG00000102024	PLS3	plastin 3 [Source:HGNC Symbol;Acc:HGNC:9091]	1.33161	0.842254	0.660843		1.04612	0.842254	0.312722
ENSG00000163512	AZI2	5-azacytidine induced 2 [Source:HGNC Symbol;Acc:HGNC:24002]	1.32012	0.835064	0.660708		0.899214	0.835064	0.106777
ENSG00000128346	C22orf23	chromosome 22 open reading frame 23 [Source:HGNC Symbol;Acc:HGNC:18589]	1.27103	0.804164	0.660438		0.730152	0.804164	-0.139293
ENSG00000101180	HRH3	histamine receptor H3 [Source:HGNC Symbol;Acc:HGNC:5184]	0.794245	0.502577	0.660239		0.423373	0.502577	-0.247416
ENSG00000188986	NELFB	negative elongation factor complex member B [Source:HGNC Symbol;Acc:HGNC:24324]	1.06633	0.6748	0.660117		0.59186	0.6748	-0.189205
ENSG00000124171	PARD6B	par-6 family cell polarity regulator beta [Source:HGNC Symbol;Acc:HGNC:16245]	1.12719	0.713336	0.660072		1.23261	0.713336	0.789062
ENSG00000126226	PCID2	PCI domain containing 2 [Source:HGNC Symbol;Acc:HGNC:25653]	1.193	0.755002	0.660046		0.784892	0.755002	0.0560144
ENSG00000012983	MAP4K5	mitogen-activated protein kinase kinase kinase kinase 5 [Source:HGNC Symbol;Acc:HGNC:6867]	1.40001	0.886062	0.659961		0.947365	0.886062	0.0965129
ENSG00000115966	ATF2	activating transcription factor 2 [Source:HGNC Symbol;Acc:HGNC:784]	1.51388	0.958576	0.659291		1.09674	0.958576	0.194257
ENSG00000166986	MARS	methionyl-tRNA synthetase [Source:HGNC Symbol;Acc:HGNC:6898]	1.35535	0.858209	0.65926		1.03845	0.858209	0.275026
ENSG00000163389	POGLUT1	protein O-glucosyltransferase 1 [Source:HGNC Symbol;Acc:HGNC:22954]	0.892642	0.565362	0.658906		0.532009	0.565362	-0.0877255
ENSG00000242247	ARFGAP3	ADP-ribosylation factor GTPase activating protein 3 [Source:HGNC Symbol;Acc:HGNC:661]	1.457	0.9232	0.658281		0.732152	0.9232	-0.334499
ENSG00000135749	PCNXL2	pecanex-like 2 (Drosophila) [Source:HGNC Symbol;Acc:HGNC:8736]	1.17194	0.742599	0.658245		0.587979	0.742599	-0.336819
ENSG00000198646	NCOA6	nuclear receptor coactivator 6 [Source:HGNC Symbol;Acc:HGNC:15936]	1.48913	0.943683	0.658095		1.02122	0.943683	0.113918
ENSG00000065802	ASB1	ankyrin repeat and SOCS box containing 1 [Source:HGNC Symbol;Acc:HGNC:16011]	1.05342	0.667907	0.657365		0.744222	0.667907	0.156085
ENSG00000158201	ABHD3	abhydrolase domain containing 3 [Source:HGNC Symbol;Acc:HGNC:18718]	1.94678	1.23457	0.657086		0.974899	1.23457	-0.340681
ENSG00000144182	LIPT1	lipoyltransferase 1 [Source:HGNC Symbol;Acc:HGNC:29569]	0.870397	0.552099	0.656747		0.41224	0.552099	-0.421442
ENSG00000239305	RNF103	ring finger protein 103 [Source:HGNC Symbol;Acc:HGNC:12859]	1.68781	1.07061	0.656718		1.1635	1.07061	0.120038
ENSG00000156642	NPTN	neuroplastin [Source:HGNC Symbol;Acc:HGNC:17867]	1.95121	1.23813	0.656205		1.34268	1.23813	0.116955
ENSG00000142530	FAM71E1	family with sequence similarity 71, member E1 [Source:HGNC Symbol;Acc:HGNC:25107]	1.14694	0.727891	0.655998		0.647713	0.727891	-0.168367
ENSG00000183137	CEP57L1	centrosomal protein 57kDa-like 1 [Source:HGNC Symbol;Acc:HGNC:21561]	0.591032	0.37522	0.6555		0.367376	0.37522	-0.0304805
ENSG00000135720	DYNC1LI2	dynein, cytoplasmic 1, light intermediate chain 2 [Source:HGNC Symbol;Acc:HGNC:2966]	1.33571	0.848021	0.655432		1.00415	0.848021	0.243804
ENSG00000117016	RIMS3	regulating synaptic membrane exocytosis 3 [Source:HGNC Symbol;Acc:HGNC:21292]	1.35942	0.863418	0.654865		0.690468	0.863418	-0.322483
ENSG00000165914	TTC7B	tetratricopeptide repeat domain 7B [Source:HGNC Symbol;Acc:HGNC:19858]	1.37731	0.874787	0.654852		0.894356	0.874787	0.0319176
ENSG00000198964	SGMS1	sphingomyelin synthase 1 [Source:HGNC Symbol;Acc:HGNC:29799]	1.51077	0.959648	0.654708		1.04112	0.959648	0.11756
ENSG00000136750	GAD2	glutamate decarboxylase 2 (pancreatic islets and brain, 65kDa) [Source:HGNC Symbol;Acc:HGNC:4093]	1.76817	1.12322	0.654613		2.58474	1.12322	1.20237
ENSG00000170832	USP32	ubiquitin specific peptidase 32 [Source:HGNC Symbol;Acc:HGNC:19143]	1.65474	1.0515	0.654162		1.14441	1.0515	0.122154
ENSG00000138399	FASTKD1	FAST kinase domains 1 [Source:HGNC Symbol;Acc:HGNC:26150]	0.728991	0.463283	0.654005		0.436982	0.463283	-0.0843198
ENSG00000147010	SH3KBP1	SH3-domain kinase binding protein 1 [Source:HGNC Symbol;Acc:HGNC:13867]	1.50139	0.954645	0.653266		1.00032	0.954645	0.0674241
ENSG00000143434	SEMA6C	sema domain, transmembrane domain (TM), and cytoplasmic domain, (semaphorin) 6C [Source:HGNC Symbol;Acc:HGNC:10740]	1.01457	0.645122	0.653226		0.456465	0.645122	-0.499067
ENSG00000076604	TRAF4	TNF receptor-associated factor 4 [Source:HGNC Symbol;Acc:HGNC:12034]	1.79904	1.14429	0.652776		1.09845	1.14429	-0.0589809
ENSG00000173264	GPR137	G protein-coupled receptor 137 [Source:HGNC Symbol;Acc:HGNC:24300]	1.2474	0.793559	0.652512		0.695013	0.793559	-0.191297
ENSG00000084463	WBP11	WW domain binding protein 11 [Source:HGNC Symbol;Acc:HGNC:16461]	1.37591	0.875334	0.652483		1.18024	0.875334	0.431176
ENSG00000075234	TTC38	tetratricopeptide repeat domain 38 [Source:HGNC Symbol;Acc:HGNC:26082]	1.00725	0.640821	0.652423		0.569095	0.640821	-0.171252
ENSG00000131697	NPHP4	nephronophthisis 4 [Source:HGNC Symbol;Acc:HGNC:19104]	1.33417	0.849142	0.651863		1.55395	0.849142	0.871863
ENSG00000070423	RNF126	ring finger protein 126 [Source:HGNC Symbol;Acc:HGNC:21151]	1.5901	1.01211	0.651746		1.01355	1.01211	0.00204168
ENSG00000151692	RNF144A	ring finger protein 144A [Source:HGNC Symbol;Acc:HGNC:20457]	0.929546	0.591668	0.651738		0.780625	0.591668	0.399841
ENSG00000143442	POGZ	pogo transposable element with ZNF domain [Source:HGNC Symbol;Acc:HGNC:18801]	1.06265	0.676486	0.65154		1.0634	0.676486	0.652548
ENSG00000125170	DOK4	docking protein 4 [Source:HGNC Symbol;Acc:HGNC:19868]	1.33468	0.849682	0.651503		0.598951	0.849682	-0.504484
ENSG00000131188	PRR7	proline rich 7 (synaptic) [Source:HGNC Symbol;Acc:HGNC:28130]	1.45857	0.92873	0.651227		1.08494	0.92873	0.224281
ENSG00000159753	RLTPR	RGD motif, leucine rich repeats, tropomodulin domain and proline-rich containing [Source:HGNC Symbol;Acc:HGNC:27089]	1.30107	0.828677	0.65082		1.39129	0.828677	0.747542
ENSG00000179632	MAF1	MAF1 homolog, negative regulator of RNA polymerase III [Source:HGNC Symbol;Acc:HGNC:24966]	1.56714	0.998216	0.650705		1.05047	0.998216	0.0736107
ENSG00000160049	DFFA	DNA fragmentation factor, 45kDa, alpha polypeptide [Source:HGNC Symbol;Acc:HGNC:2772]	0.752788	0.479604	0.650401		0.587966	0.479604	0.29389
ENSG00000182372	CLN8	ceroid-lipofuscinosis, neuronal 8 [Source:HGNC Symbol;Acc:HGNC:2079]	3.48639	2.22247	0.649566		1.52274	2.22247	-0.545492
ENSG00000151176	PLBD2	phospholipase B domain containing 2 [Source:HGNC Symbol;Acc:HGNC:27283]	1.10708	0.705946	0.649134		0.759014	0.705946	0.104569
ENSG00000157778	PSMG3	proteasome (prosome, macropain) assembly chaperone 3 [Source:HGNC Symbol;Acc:HGNC:22420]	0.921313	0.587762	0.64846		0.436968	0.587762	-0.427703
ENSG00000174132	FAM174A	family with sequence similarity 174, member A [Source:HGNC Symbol;Acc:HGNC:24943]	1.14344	0.729471	0.648456		0.700063	0.729471	-0.0593641
ENSG00000196338	NLGN3	neuroligin 3 [Source:HGNC Symbol;Acc:HGNC:14289]	0.584796	0.373088	0.648415		0.609375	0.373088	0.707813
ENSG00000101413	RPRD1B	regulation of nuclear pre-mRNA domain containing 1B [Source:HGNC Symbol;Acc:HGNC:16209]	0.98229	0.626727	0.648311		0.890577	0.626727	0.506903
ENSG00000072422	RHOBTB1	Rho-related BTB domain containing 1 [Source:HGNC Symbol;Acc:HGNC:18738]	0.715333	0.456424	0.648238		0.659189	0.456424	0.530315
ENSG00000174106	LEMD3	LEM domain containing 3 [Source:HGNC Symbol;Acc:HGNC:28887]	1.45789	0.930287	0.648138		1.33118	0.930287	0.51696
ENSG00000048342	CC2D2A	coiled-coil and C2 domain containing 2A [Source:HGNC Symbol;Acc:HGNC:29253]	0.806229	0.514725	0.647387		0.585636	0.514725	0.186202
ENSG00000163900	TMEM41A	transmembrane protein 41A [Source:HGNC Symbol;Acc:HGNC:30544]	1.11672	0.713249	0.646794		0.476473	0.713249	-0.582012
ENSG00000111731	C2CD5	C2 calcium-dependent domain containing 5 [Source:HGNC Symbol;Acc:HGNC:29062]	0.851823	0.544083	0.646728		0.585672	0.544083	0.106266
ENSG00000123595	RAB9A	RAB9A, member RAS oncogene family [Source:HGNC Symbol;Acc:HGNC:9792]	1.45545	0.929651	0.6467		0.890275	0.929651	-0.0624381
ENSG00000087008	ACOX3	acyl-CoA oxidase 3, pristanoyl [Source:HGNC Symbol;Acc:HGNC:121]	1.24037	0.792278	0.646688		0.577659	0.792278	-0.45579
ENSG00000130703	OSBPL2	oxysterol binding protein-like 2 [Source:HGNC Symbol;Acc:HGNC:15761]	1.19617	0.764051	0.646684		0.732902	0.764051	-0.0600479
ENSG00000188706	ZDHHC9	zinc finger, DHHC-type containing 9 [Source:HGNC Symbol;Acc:HGNC:18475]	1.75436	1.12071	0.646532		1.19998	1.12071	0.0985931
ENSG00000160305	DIP2A	disco-interacting protein 2 homolog A [Source:HGNC Symbol;Acc:HGNC:17217]	1.03646	0.662166	0.646401		0.649314	0.662166	-0.0282772
ENSG00000177679	SRRM3	serine/arginine repetitive matrix 3 [Source:HGNC Symbol;Acc:HGNC:26729]	1.3569	0.866951	0.64629		0.933149	0.866951	0.106157
ENSG00000113460	BRIX1	BRX1, biogenesis of ribosomes [Source:HGNC Symbol;Acc:HGNC:24170]	1.02827	0.657095	0.646049		0.610437	0.657095	-0.106261
ENSG00000164934	DCAF13	DDB1 and CUL4 associated factor 13 [Source:HGNC Symbol;Acc:HGNC:24535]	1.4012	0.895586	0.64576		0.778763	0.895586	-0.201648
ENSG00000120942	UBIAD1	UbiA prenyltransferase domain containing 1 [Source:HGNC Symbol;Acc:HGNC:30791]	0.750632	0.47981	0.645641		0.548276	0.47981	0.192438
ENSG00000104859	CLASRP	CLK4-associating serine/arginine rich protein [Source:HGNC Symbol;Acc:HGNC:17731]	1.37508	0.879012	0.645565		0.987549	0.879012	0.167969
ENSG00000084112	SSH1	slingshot protein phosphatase 1 [Source:HGNC Symbol;Acc:HGNC:30579]	1.014	0.648213	0.645517		0.683182	0.648213	0.0758029
ENSG00000131370	SH3BP5	SH3-domain binding protein 5 (BTK-associated) [Source:HGNC Symbol;Acc:HGNC:10827]	1.30927	0.83709	0.645304		0.58498	0.83709	-0.516995
ENSG00000257704	INAFM1	InaF-motif containing 1 [Source:HGNC Symbol;Acc:HGNC:27406]	1.34679	0.861109	0.645258		0.768762	0.861109	-0.163658
ENSG00000151657	KIN	Kin17 DNA and RNA binding protein [Source:HGNC Symbol;Acc:HGNC:6327]	0.912337	0.58343	0.645007		0.849252	0.58343	0.541632
ENSG00000071537	SEL1L	sel-1 suppressor of lin-12-like (C. elegans) [Source:HGNC Symbol;Acc:HGNC:10717]	0.895325	0.572613	0.64485		0.673621	0.572613	0.234375
ENSG00000002919	SNX11	sorting nexin 11 [Source:HGNC Symbol;Acc:HGNC:14975]	1.2647	0.809031	0.644526		0.568035	0.809031	-0.510214
ENSG00000177731	FLII	flightless I actin binding protein [Source:HGNC Symbol;Acc:HGNC:3750]	1.33407	0.853992	0.64354		0.728224	0.853992	-0.22984
ENSG00000183155	RABIF	RAB interacting factor [Source:HGNC Symbol;Acc:HGNC:9797]	0.947168	0.606456	0.643217		0.675812	0.606456	0.156219
ENSG00000143368	SF3B4	splicing factor 3b, subunit 4, 49kDa [Source:HGNC Symbol;Acc:HGNC:10771]	1.23792	0.792694	0.64308		0.822571	0.792694	0.0533767
ENSG00000188064	WNT7B	wingless-type MMTV integration site family, member 7B [Source:HGNC Symbol;Acc:HGNC:12787]	1.12007	0.717286	0.642965		0.573529	0.717286	-0.322683
ENSG00000189410	SH2D5	SH2 domain containing 5 [Source:HGNC Symbol;Acc:HGNC:28819]	1.56854	1.00451	0.642934		0.601438	1.00451	-0.740001
ENSG00000151012	SLC7A11	solute carrier family 7 (anionic amino acid transporter light chain, xc- system), member 11 [Source:HGNC Symbol;Acc:HGNC:11059]	2.30646	1.47715	0.642863		0.989874	1.47715	-0.577503
ENSG00000168827	GFM1	G elongation factor, mitochondrial 1 [Source:HGNC Symbol;Acc:HGNC:13780]	1.04443	0.668903	0.642845		0.64705	0.668903	-0.0479206
ENSG00000115652	UXS1	UDP-glucuronate decarboxylase 1 [Source:HGNC Symbol;Acc:HGNC:17729]	1.17738	0.754389	0.642196		0.901531	0.754389	0.257068
ENSG00000117569	PTBP2	polypyrimidine tract binding protein 2 [Source:HGNC Symbol;Acc:HGNC:17662]	0.954964	0.611935	0.642067		0.76	0.611935	0.31262
ENSG00000147650	LRP12	low density lipoprotein receptor-related protein 12 [Source:HGNC Symbol;Acc:HGNC:31708]	1.17073	0.750275	0.641919		0.796587	0.750275	0.0864114
ENSG00000189227	C15orf61	chromosome 15 open reading frame 61 [Source:HGNC Symbol;Acc:HGNC:34453]	1.02065	0.654207	0.641669		0.60386	0.654207	-0.115532
ENSG00000173145	NOC3L	NOC3-like DNA replication regulator [Source:HGNC Symbol;Acc:HGNC:24034]	0.859985	0.551342	0.641364		0.715989	0.551342	0.376989
ENSG00000082641	NFE2L1	nuclear factor, erythroid 2-like 1 [Source:HGNC Symbol;Acc:HGNC:7781]	1.33289	0.854597	0.641245		0.837716	0.854597	-0.0287824
ENSG00000154447	SH3RF1	SH3 domain containing ring finger 1 [Source:HGNC Symbol;Acc:HGNC:17650]	1.74066	1.11607	0.641209		1.37762	1.11607	0.303757
ENSG00000180488	FAM73A	family with sequence similarity 73, member A [Source:HGNC Symbol;Acc:HGNC:24741]	0.783144	0.502156	0.641142		0.644328	0.502156	0.359659
ENSG00000146433	TMEM181	transmembrane protein 181 [Source:HGNC Symbol;Acc:HGNC:20958]	1.14045	0.73127	0.641127		0.875341	0.73127	0.259441
ENSG00000166889	PATL1	protein associated with topoisomerase II homolog 1 (yeast) [Source:HGNC Symbol;Acc:HGNC:26721]	1.86654	1.19697	0.640983		1.30149	1.19697	0.120781
ENSG00000147316	MCPH1	microcephalin 1 [Source:HGNC Symbol;Acc:HGNC:6954]	1.02009	0.654169	0.640964		0.710746	0.654169	0.119671
ENSG00000026652	AGPAT4	1-acylglycerol-3-phosphate O-acyltransferase 4 [Source:HGNC Symbol;Acc:HGNC:20885]	2.12285	1.36195	0.640323		1.49124	1.36195	0.130833
ENSG00000125652	ALKBH7	alkB homolog 7 [Source:HGNC Symbol;Acc:HGNC:21306]	1.21834	0.781794	0.640062		0.715004	0.781794	-0.128837
ENSG00000157087	ATP2B2	ATPase, Ca++ transporting, plasma membrane 2 [Source:HGNC Symbol;Acc:HGNC:815]	0.776051	0.498079	0.639776		0.667974	0.498079	0.423416
ENSG00000181873	IBA57	IBA57 homolog, iron-sulfur cluster assembly [Source:HGNC Symbol;Acc:HGNC:27302]	1.19772	0.768797	0.639619		0.784282	0.768797	0.0287693
ENSG00000163393	SLC22A15	solute carrier family 22, member 15 [Source:HGNC Symbol;Acc:HGNC:20301]	0.93574	0.600714	0.639429		0.543687	0.600714	-0.143901
ENSG00000124209	RAB22A	RAB22A, member RAS oncogene family [Source:HGNC Symbol;Acc:HGNC:9764]	1.60436	1.03016	0.639127		1.06881	1.03016	0.0531337
ENSG00000172059	KLF11	Kruppel-like factor 11 [Source:HGNC Symbol;Acc:HGNC:11811]	1.0649	0.683809	0.63905		0.714948	0.683809	0.0642437
ENSG00000104660	LEPROTL1	leptin receptor overlapping transcript-like 1 [Source:HGNC Symbol;Acc:HGNC:6555]	1.48305	0.952374	0.638968		0.742551	0.952374	-0.359038
ENSG00000172795	DCP2	decapping mRNA 2 [Source:HGNC Symbol;Acc:HGNC:24452]	1.0063	0.646557	0.638217		0.762979	0.646557	0.238865
ENSG00000064547	LPAR2	lysophosphatidic acid receptor 2 [Source:HGNC Symbol;Acc:HGNC:3168]	0.874149	0.56181	0.637796		0.524744	0.56181	-0.098471
ENSG00000113231	PDE8B	phosphodiesterase 8B [Source:HGNC Symbol;Acc:HGNC:8794]	1.27718	0.820852	0.637768		1.01535	0.820852	0.30678
ENSG00000164434	FABP7	fatty acid binding protein 7, brain [Source:HGNC Symbol;Acc:HGNC:3562]	1.35276	0.869613	0.637463		0.844814	0.869613	-0.0417394
ENSG00000092847	AGO1	argonaute RISC catalytic component 1 [Source:HGNC Symbol;Acc:HGNC:3262]	1.1902	0.765647	0.636449		0.757361	0.765647	-0.0156982
ENSG00000110697	PITPNM1	phosphatidylinositol transfer protein, membrane-associated 1 [Source:HGNC Symbol;Acc:HGNC:9003]	1.68278	1.08252	0.636446		1.24984	1.08252	0.207343
ENSG00000163577	EIF5A2	eukaryotic translation initiation factor 5A2 [Source:HGNC Symbol;Acc:HGNC:3301]	1.40928	0.906664	0.636318		0.800946	0.906664	-0.178863
ENSG00000178567	EPM2AIP1	EPM2A (laforin) interacting protein 1 [Source:HGNC Symbol;Acc:HGNC:19735]	0.933804	0.601129	0.635444		0.867697	0.601129	0.529516
ENSG00000256537	SMIM10L1	small integral membrane protein 10 like 1 [Source:HGNC Symbol;Acc:HGNC:49847]	1.21663	0.783202	0.635435		0.84369	0.783202	0.10733
ENSG00000130224	LRCH2	leucine-rich repeats and calponin homology (CH) domain containing 2 [Source:HGNC Symbol;Acc:HGNC:29292]	1.56775	1.0093	0.635344		0.883243	1.0093	-0.192473
ENSG00000120709	FAM53C	family with sequence similarity 53, member C [Source:HGNC Symbol;Acc:HGNC:1336]	1.50937	0.9718	0.635211		1.24406	0.9718	0.356325
ENSG00000166676	TVP23A	trans-golgi network vesicle protein 23 homolog A (S. cerevisiae) [Source:HGNC Symbol;Acc:HGNC:20398]	1.03266	0.665068	0.634796		0.50461	0.665068	-0.398332
ENSG00000178381	ZFAND2A	zinc finger, AN1-type domain 2A [Source:HGNC Symbol;Acc:HGNC:28073]	1.23626	0.796308	0.634588		0.729887	0.796308	-0.125653
ENSG00000140598	EFTUD1	elongation factor Tu GTP binding domain containing 1 [Source:HGNC Symbol;Acc:HGNC:25789]	1.16709	0.751962	0.634179		0.718094	0.751962	-0.0664855
ENSG00000172465	TCEAL1	transcription elongation factor A (SII)-like 1 [Source:HGNC Symbol;Acc:HGNC:11616]	1.06426	0.685728	0.634145		0.689199	0.685728	0.0072848
ENSG00000177302	TOP3A	topoisomerase (DNA) III alpha [Source:HGNC Symbol;Acc:HGNC:11992]	0.932033	0.600585	0.634012		0.748824	0.600585	0.318258
ENSG00000136999	NOV	nephroblastoma overexpressed [Source:HGNC Symbol;Acc:HGNC:7885]	1.18078	0.761006	0.633763		0.8714	0.761006	0.195428
ENSG00000221968	FADS3	fatty acid desaturase 3 [Source:HGNC Symbol;Acc:HGNC:3576]	1.24219	0.800645	0.633657		0.600782	0.800645	-0.41432
ENSG00000134153	EMC7	ER membrane protein complex subunit 7 [Source:HGNC Symbol;Acc:HGNC:24301]	1.43826	0.927227	0.633325		1.05989	0.927227	0.192913
ENSG00000184182	UBE2F	ubiquitin-conjugating enzyme E2F (putative) [Source:HGNC Symbol;Acc:HGNC:12480]	1.56115	1.00652	0.633229		0.888585	1.00652	-0.179797
ENSG00000149679	CABLES2	Cdk5 and Abl enzyme substrate 2 [Source:HGNC Symbol;Acc:HGNC:16143]	1.42294	0.917679	0.632818		0.927695	0.917679	0.0156614
ENSG00000196449	YRDC	yrdC N(6)-threonylcarbamoyltransferase domain containing [Source:HGNC Symbol;Acc:HGNC:28905]	1.54058	0.993586	0.632756		1.33429	0.993586	0.425354
ENSG00000204065	TCEAL5	transcription elongation factor A (SII)-like 5 [Source:HGNC Symbol;Acc:HGNC:22282]	1.84687	1.19141	0.632413		2.0724	1.19141	0.798633
ENSG00000140105	WARS	tryptophanyl-tRNA synthetase [Source:HGNC Symbol;Acc:HGNC:12729]	1.12592	0.726436	0.632202		0.54153	0.726436	-0.423795
ENSG00000103342	GSPT1	G1 to S phase transition 1 [Source:HGNC Symbol;Acc:HGNC:4621]	1.48783	0.960211	0.631783		1.00237	0.960211	0.0619927
ENSG00000168724	DNAJC21	DnaJ (Hsp40) homolog, subfamily C, member 21 [Source:HGNC Symbol;Acc:HGNC:27030]	1.52842	0.986525	0.631609		0.969902	0.986525	-0.0245176
ENSG00000100207	TCF20	transcription factor 20 (AR1) [Source:HGNC Symbol;Acc:HGNC:11631]	1.21913	0.786952	0.631508		1.03602	0.786952	0.396701
ENSG00000137218	FRS3	fibroblast growth factor receptor substrate 3 [Source:HGNC Symbol;Acc:HGNC:16970]	0.814844	0.526048	0.631329		0.432594	0.526048	-0.282182
ENSG00000119335	SET	SET nuclear proto-oncogene [Source:HGNC Symbol;Acc:HGNC:10760]	1.30565	0.842986	0.631191		0.960319	0.842986	0.188004
ENSG00000162231	NXF1	nuclear RNA export factor 1 [Source:HGNC Symbol;Acc:HGNC:8071]	1.98368	1.28094	0.630976		1.32574	1.28094	0.0495946
ENSG00000108443	RPS6KB1	ribosomal protein S6 kinase, 70kDa, polypeptide 1 [Source:HGNC Symbol;Acc:HGNC:10436]	1.31494	0.849149	0.630906		0.947987	0.849149	0.158849
ENSG00000174799	CEP135	centrosomal protein 135kDa [Source:HGNC Symbol;Acc:HGNC:29086]	1.27381	0.822682	0.630746		0.824351	0.822682	0.00292463
ENSG00000157837	SPPL3	signal peptide peptidase like 3 [Source:HGNC Symbol;Acc:HGNC:30424]	1.3212	0.8533	0.630721		1.02233	0.8533	0.26073
ENSG00000129473	BCL2L2	BCL2-like 2 [Source:HGNC Symbol;Acc:HGNC:995]	1.40881	0.909958	0.6306		0.840748	0.909958	-0.114127
ENSG00000101391	CDK5RAP1	CDK5 regulatory subunit associated protein 1 [Source:HGNC Symbol;Acc:HGNC:15880]	1.01267	0.654613	0.629449		0.381338	0.654613	-0.779573
ENSG00000140521	POLG	polymerase (DNA directed), gamma [Source:HGNC Symbol;Acc:HGNC:9179]	1.24661	0.805868	0.629396		1.04035	0.805868	0.368448
ENSG00000162694	EXTL2	exostosin-like glycosyltransferase 2 [Source:HGNC Symbol;Acc:HGNC:3516]	0.8803	0.569116	0.629272		0.470205	0.569116	-0.275434
ENSG00000116473	RAP1A	RAP1A, member of RAS oncogene family [Source:HGNC Symbol;Acc:HGNC:9855]	1.47005	0.950504	0.629106		0.714513	0.950504	-0.411732
ENSG00000148606	POLR3A	polymerase (RNA) III (DNA directed) polypeptide A, 155kDa [Source:HGNC Symbol;Acc:HGNC:30074]	0.841876	0.54434	0.629099		0.720659	0.54434	0.404808
ENSG00000100664	EIF5	eukaryotic translation initiation factor 5 [Source:HGNC Symbol;Acc:HGNC:3299]	2.08375	1.34744	0.628958		1.43341	1.34744	0.0892215
ENSG00000118407	FILIP1	filamin A interacting protein 1 [Source:HGNC Symbol;Acc:HGNC:21015]	0.95059	0.614795	0.628718		0.948273	0.614795	0.625198
ENSG00000142444	C19orf52	chromosome 19 open reading frame 52 [Source:HGNC Symbol;Acc:HGNC:25152]	1.14254	0.739142	0.628318		0.904169	0.739142	0.290741
ENSG00000059145	UNKL	unkempt family zinc finger-like [Source:HGNC Symbol;Acc:HGNC:14184]	0.879571	0.569088	0.628149		0.851068	0.569088	0.580624
ENSG00000130725	UBE2M	ubiquitin-conjugating enzyme E2M [Source:HGNC Symbol;Acc:HGNC:12491]	1.49462	0.967038	0.628133		0.989135	0.967038	0.0325946
ENSG00000096717	SIRT1	sirtuin 1 [Source:HGNC Symbol;Acc:HGNC:14929]	1.60435	1.03853	0.627453		0.946978	1.03853	-0.133137
ENSG00000010818	HIVEP2	human immunodeficiency virus type I enhancer binding protein 2 [Source:HGNC Symbol;Acc:HGNC:4921]	2.55461	1.65365	0.627445		2.43321	1.65365	0.557205
ENSG00000130764	LRRC47	leucine rich repeat containing 47 [Source:HGNC Symbol;Acc:HGNC:29207]	1.01938	0.659955	0.627258		0.848649	0.659955	0.3628
ENSG00000151090	THRB	thyroid hormone receptor, beta [Source:HGNC Symbol;Acc:HGNC:11799]	1.0727	0.694854	0.62647		1.02195	0.694854	0.556535
ENSG00000210127	MT-TA	mitochondrially encoded tRNA alanine [Source:HGNC Symbol;Acc:HGNC:7475]	1.5067	0.97601	0.626426		0.532763	0.97601	-0.873403
ENSG00000113327	GABRG2	gamma-aminobutyric acid (GABA) A receptor, gamma 2 [Source:HGNC Symbol;Acc:HGNC:4087]	1.34818	0.873359	0.626367		0.954629	0.873359	0.128365
ENSG00000175376	EIF1AD	eukaryotic translation initiation factor 1A domain containing [Source:HGNC Symbol;Acc:HGNC:28147]	1.18284	0.766439	0.626016		0.847928	0.766439	0.145771
ENSG00000100387	RBX1	ring-box 1, E3 ubiquitin protein ligase [Source:HGNC Symbol;Acc:HGNC:9928]	1.02948	0.667466	0.625147		0.706097	0.667466	0.0811712
ENSG00000169918	OTUD7A	OTU deubiquitinase 7A [Source:HGNC Symbol;Acc:HGNC:20718]	1.37358	0.890642	0.625029		1.03088	0.890642	0.210961
ENSG00000133997	MED6	mediator complex subunit 6 [Source:HGNC Symbol;Acc:HGNC:19970]	1.08699	0.704815	0.625019		0.799613	0.704815	0.182057
ENSG00000165072	MAMDC2	MAM domain containing 2 [Source:HGNC Symbol;Acc:HGNC:23673]	1.24674	0.808436	0.62495		0.913926	0.808436	0.176943
ENSG00000103187	COTL1	coactosin-like F-actin binding protein 1 [Source:HGNC Symbol;Acc:HGNC:18304]	1.94516	1.26138	0.624894		1.03501	1.26138	-0.285355
ENSG00000111684	LPCAT3	lysophosphatidylcholine acyltransferase 3 [Source:HGNC Symbol;Acc:HGNC:30244]	0.96379	0.624994	0.624877		0.721905	0.624994	0.207967
ENSG00000110237	ARHGEF17	Rho guanine nucleotide exchange factor (GEF) 17 [Source:HGNC Symbol;Acc:HGNC:21726]	1.11191	0.721357	0.624255		0.899349	0.721357	0.318168
ENSG00000221869	CEBPD	CCAAT/enhancer binding protein (C/EBP), delta [Source:HGNC Symbol;Acc:HGNC:1835]	2.5724	1.66891	0.624209		1.72142	1.66891	0.0446979
ENSG00000262246	CORO7	coronin 7 [Source:HGNC Symbol;Acc:HGNC:26161]	1.35226	0.877525	0.623856		0.760875	0.877525	-0.205781
ENSG00000198399	ITSN2	intersectin 2 [Source:HGNC Symbol;Acc:HGNC:6184]	1.26235	0.819385	0.6235		0.943814	0.819385	0.203962
ENSG00000112290	WASF1	WAS protein family, member 1 [Source:HGNC Symbol;Acc:HGNC:12732]	1.56552	1.0164	0.623179		0.906826	1.0164	-0.164569
ENSG00000126698	DNAJC8	DnaJ (Hsp40) homolog, subfamily C, member 8 [Source:HGNC Symbol;Acc:HGNC:15470]	1.19488	0.775824	0.623067		0.730002	0.775824	-0.0878304
ENSG00000196821	C6orf106	chromosome 6 open reading frame 106 [Source:HGNC Symbol;Acc:HGNC:21215]	3.11513	2.02269	0.623015		1.5272	2.02269	-0.405391
ENSG00000168040	FADD	Fas (TNFRSF6)-associated via death domain [Source:HGNC Symbol;Acc:HGNC:3573]	0.740833	0.481196	0.622523		0.471513	0.481196	-0.0293263
ENSG00000251322	SHANK3	SH3 and multiple ankyrin repeat domains 3 [Source:HGNC Symbol;Acc:HGNC:14294]	1.76934	1.14938	0.622358		1.28661	1.14938	0.162724
ENSG00000172667	ZMAT3	zinc finger, matrin-type 3 [Source:HGNC Symbol;Acc:HGNC:29983]	1.33523	0.867608	0.62197		1.30049	0.867608	0.583934
ENSG00000110171	TRIM3	tripartite motif containing 3 [Source:HGNC Symbol;Acc:HGNC:10064]	1.48374	0.964198	0.621832		0.9553	0.964198	-0.0133766
ENSG00000178234	GALNT11	polypeptide N-acetylgalactosaminyltransferase 11 [Source:HGNC Symbol;Acc:HGNC:19875]	1.95824	1.27277	0.621582		2.25074	1.27277	0.822424
ENSG00000147416	ATP6V1B2	ATPase, H+ transporting, lysosomal 56/58kDa, V1 subunit B2 [Source:HGNC Symbol;Acc:HGNC:854]	1.52252	0.99021	0.620657		1.19971	0.99021	0.276878
ENSG00000118246	FASTKD2	FAST kinase domains 2 [Source:HGNC Symbol;Acc:HGNC:29160]	0.876782	0.570417	0.620201		0.530302	0.570417	-0.105203
ENSG00000139132	FGD4	FYVE, RhoGEF and PH domain containing 4 [Source:HGNC Symbol;Acc:HGNC:19125]	0.906291	0.589791	0.61977		0.977206	0.589791	0.728459
ENSG00000162878	PKDCC	protein kinase domain containing, cytoplasmic [Source:HGNC Symbol;Acc:HGNC:25123]	0.962323	0.62642	0.619392		0.519084	0.62642	-0.271161
ENSG00000095319	NUP188	nucleoporin 188kDa [Source:HGNC Symbol;Acc:HGNC:17859]	0.930001	0.605537	0.619017		0.681947	0.605537	0.171444
ENSG00000168785	TSPAN5	tetraspanin 5 [Source:HGNC Symbol;Acc:HGNC:17753]	1.53887	1.00211	0.618834		0.960753	1.00211	-0.0607968
ENSG00000156928	MALSU1	mitochondrial assembly of ribosomal large subunit 1 [Source:HGNC Symbol;Acc:HGNC:21721]	1.45255	0.946085	0.618546		0.86756	0.946085	-0.125006
ENSG00000184384	MAML2	mastermind-like 2 (Drosophila) [Source:HGNC Symbol;Acc:HGNC:16259]	1.66845	1.08696	0.618218		1.28824	1.08696	0.245112
ENSG00000275700	AATF	apoptosis antagonizing transcription factor [Source:HGNC Symbol;Acc:HGNC:19235]	1.33651	0.87079	0.618076		0.629855	0.87079	-0.467305
ENSG00000100075	SLC25A1	solute carrier family 25 (mitochondrial carrier; citrate transporter), member 1 [Source:HGNC Symbol;Acc:HGNC:10979]	1.31043	0.85392	0.617865		0.715732	0.85392	-0.254682
ENSG00000008710	PKD1	polycystic kidney disease 1 (autosomal dominant) [Source:HGNC Symbol;Acc:HGNC:9008]	1.39199	0.907079	0.617852		0.912306	0.907079	0.00828831
ENSG00000175324	LSM1	LSM1 homolog, mRNA degradation associated [Source:HGNC Symbol;Acc:HGNC:20472]	1.18677	0.773484	0.617599		0.749062	0.773484	-0.046286
ENSG00000119328	FAM206A	family with sequence similarity 206, member A [Source:HGNC Symbol;Acc:HGNC:1364]	1.26036	0.821468	0.617563		0.853287	0.821468	0.0548261
ENSG00000167785	ZNF558	zinc finger protein 558 [Source:HGNC Symbol;Acc:HGNC:26422]	0.783963	0.511106	0.617163		0.51956	0.511106	0.0236676
ENSG00000101096	NFATC2	nuclear factor of activated T-cells, cytoplasmic, calcineurin-dependent 2 [Source:HGNC Symbol;Acc:HGNC:7776]	9.55076	6.22698	0.617083		9.87271	6.22698	0.664913
ENSG00000105642	KCNN1	potassium channel, calcium activated intermediate/small conductance subfamily N alpha, member 1 [Source:HGNC Symbol;Acc:HGNC:6290]	1.63812	1.0682	0.616854		0.739197	1.0682	-0.531154
ENSG00000097021	ACOT7	acyl-CoA thioesterase 7 [Source:HGNC Symbol;Acc:HGNC:24157]	1.51496	0.98799	0.616707		0.73352	0.98799	-0.42966
ENSG00000177045	SIX5	SIX homeobox 5 [Source:HGNC Symbol;Acc:HGNC:10891]	0.636875	0.415398	0.616517		0.831004	0.415398	1.00036
ENSG00000145220	LYAR	Ly1 antibody reactive [Source:HGNC Symbol;Acc:HGNC:26021]	1.12191	0.732104	0.615832		0.816991	0.732104	0.158271
ENSG00000164211	STARD4	StAR-related lipid transfer (START) domain containing 4 [Source:HGNC Symbol;Acc:HGNC:18058]	3.14876	2.0549	0.615717		3.26404	2.0549	0.667594
ENSG00000139971	C14orf37	chromosome 14 open reading frame 37 [Source:HGNC Symbol;Acc:HGNC:19846]	1.05023	0.685432	0.615614		0.709001	0.685432	0.0487739
ENSG00000171302	CANT1	calcium activated nucleotidase 1 [Source:HGNC Symbol;Acc:HGNC:19721]	0.962133	0.627963	0.615556		0.518634	0.627963	-0.275962
ENSG00000164951	PDP1	pyruvate dehyrogenase phosphatase catalytic subunit 1 [Source:HGNC Symbol;Acc:HGNC:9279]	1.66677	1.08793	0.615467		0.902235	1.08793	-0.270017
ENSG00000184602	SNN	stannin [Source:HGNC Symbol;Acc:HGNC:11149]	1.13464	0.740754	0.615172		0.36076	0.740754	-1.03795
ENSG00000068724	TTC7A	tetratricopeptide repeat domain 7A [Source:HGNC Symbol;Acc:HGNC:19750]	0.843777	0.55087	0.615151		0.686961	0.55087	0.318517
ENSG00000115760	BIRC6	baculoviral IAP repeat containing 6 [Source:HGNC Symbol;Acc:HGNC:13516]	1.19567	0.780649	0.615078		1.09876	0.780649	0.493131
ENSG00000100644	HIF1A	hypoxia inducible factor 1, alpha subunit (basic helix-loop-helix transcription factor) [Source:HGNC Symbol;Acc:HGNC:4910]	1.40063	0.914911	0.614374		0.937937	0.914911	0.0358599
ENSG00000140995	DEF8	differentially expressed in FDCP 8 homolog (mouse) [Source:HGNC Symbol;Acc:HGNC:25969]	1.11522	0.728567	0.614193		0.530088	0.728567	-0.45883
ENSG00000170759	KIF5B	kinesin family member 5B [Source:HGNC Symbol;Acc:HGNC:6324]	1.75927	1.14969	0.613723		1.19117	1.14969	0.0511239
ENSG00000169372	CRADD	CASP2 and RIPK1 domain containing adaptor with death domain [Source:HGNC Symbol;Acc:HGNC:2340]	0.950429	0.621199	0.613525		0.411667	0.621199	-0.593578
ENSG00000110619	CARS	cysteinyl-tRNA synthetase [Source:HGNC Symbol;Acc:HGNC:1493]	1.74097	1.13878	0.6124		2.6771	1.13878	1.23318
ENSG00000184967	NOC4L	nucleolar complex associated 4 homolog [Source:HGNC Symbol;Acc:HGNC:28461]	1.41411	0.925385	0.611769		1.07576	0.925385	0.217232
ENSG00000139842	CUL4A	cullin 4A [Source:HGNC Symbol;Acc:HGNC:2554]	1.13371	0.74198	0.611599		0.6376	0.74198	-0.218728
ENSG00000242114	MTFP1	mitochondrial fission process 1 [Source:HGNC Symbol;Acc:HGNC:26945]	0.845576	0.553488	0.611383		0.296944	0.553488	-0.89836
ENSG00000155561	NUP205	nucleoporin 205kDa [Source:HGNC Symbol;Acc:HGNC:18658]	1.03425	0.677121	0.611095		0.82299	0.677121	0.281462
ENSG00000062716	VMP1	vacuole membrane protein 1 [Source:HGNC Symbol;Acc:HGNC:29559]	1.4596	0.955626	0.611057		1.06369	0.955626	0.154565
ENSG00000046651	OFD1	oral-facial-digital syndrome 1 [Source:HGNC Symbol;Acc:HGNC:2567]	1.38721	0.908336	0.610888		0.651246	0.908336	-0.480023
ENSG00000172845	SP3	Sp3 transcription factor [Source:HGNC Symbol;Acc:HGNC:11208]	1.18135	0.773732	0.610533		1.03153	0.773732	0.414881
ENSG00000131016	AKAP12	A kinase (PRKA) anchor protein 12 [Source:HGNC Symbol;Acc:HGNC:370]	1.94446	1.27378	0.610257		1.07114	1.27378	-0.249973
ENSG00000102898	NUTF2	nuclear transport factor 2 [Source:HGNC Symbol;Acc:HGNC:13722]	1.32849	0.870363	0.610095		0.893098	0.870363	0.0372025
ENSG00000205978	NYNRIN	NYN domain and retroviral integrase containing [Source:HGNC Symbol;Acc:HGNC:20165]	0.695826	0.455892	0.610035		0.659957	0.455892	0.53368
ENSG00000198478	SH3BGRL2	SH3 domain binding glutamate-rich protein like 2 [Source:HGNC Symbol;Acc:HGNC:15567]	1.58276	1.0371	0.609897		1.22921	1.0371	0.245183
ENSG00000160753	RUSC1	RUN and SH3 domain containing 1 [Source:HGNC Symbol;Acc:HGNC:17153]	1.35144	0.88578	0.609478		0.902282	0.88578	0.0266312
ENSG00000165209	STRBP	spermatid perinuclear RNA binding protein [Source:HGNC Symbol;Acc:HGNC:16462]	1.50055	0.983579	0.609381		0.975308	0.983579	-0.0121824
ENSG00000275111	ZNF2	zinc finger protein 2 [Source:HGNC Symbol;Acc:HGNC:12991]	0.515946	0.338316	0.608849		0.309206	0.338316	-0.1298
ENSG00000108424	KPNB1	karyopherin (importin) beta 1 [Source:HGNC Symbol;Acc:HGNC:6400]	1.61224	1.05722	0.608785		1.04434	1.05722	-0.017689
ENSG00000138433	CIR1	corepressor interacting with RBPJ, 1 [Source:HGNC Symbol;Acc:HGNC:24217]	1.16663	0.765429	0.608011		0.877272	0.765429	0.196757
ENSG00000115233	PSMD14	proteasome (prosome, macropain) 26S subunit, non-ATPase, 14 [Source:HGNC Symbol;Acc:HGNC:16889]	1.39082	0.912535	0.607985		0.919053	0.912535	0.0102681
ENSG00000124275	MTRR	5-methyltetrahydrofolate-homocysteine methyltransferase reductase [Source:HGNC Symbol;Acc:HGNC:7473]	1.15054	0.755066	0.607634		0.600089	0.755066	-0.331426
ENSG00000142186	SCYL1	SCY1-like, kinase-like 1 [Source:HGNC Symbol;Acc:HGNC:14372]	1.44405	0.947783	0.60749		0.951284	0.947783	0.0053191
ENSG00000040487	PQLC2	PQ loop repeat containing 2 [Source:HGNC Symbol;Acc:HGNC:26001]	0.863109	0.566736	0.606865		0.853585	0.566736	0.590858
ENSG00000172890	NADSYN1	NAD synthetase 1 [Source:HGNC Symbol;Acc:HGNC:29832]	1.16795	0.766915	0.606835		0.436365	0.766915	-0.813532
ENSG00000162975	KCNF1	potassium channel, voltage gated modifier subfamily F, member 1 [Source:HGNC Symbol;Acc:HGNC:6246]	3.54251	2.3262	0.606795		4.0484	2.3262	0.799373
ENSG00000152969	JAKMIP1	janus kinase and microtubule interacting protein 1 [Source:HGNC Symbol;Acc:HGNC:26460]	1.31459	0.86341	0.606495		0.590401	0.86341	-0.548351
ENSG00000159921	GNE	glucosamine (UDP-N-acetyl)-2-epimerase/N-acetylmannosamine kinase [Source:HGNC Symbol;Acc:HGNC:23657]	1.03379	0.678995	0.606474		0.57457	0.678995	-0.240918
ENSG00000187555	USP7	ubiquitin specific peptidase 7 (herpes virus-associated) [Source:HGNC Symbol;Acc:HGNC:12630]	1.56746	1.02961	0.606332		1.42099	1.02961	0.464795
ENSG00000117020	AKT3	v-akt murine thymoma viral oncogene homolog 3 [Source:HGNC Symbol;Acc:HGNC:393]	1.52768	1.00369	0.606019		1.074	1.00369	0.0976812
ENSG00000171806	METTL18	methyltransferase like 18 [Source:HGNC Symbol;Acc:HGNC:28793]	0.461763	0.303414	0.605865		0.318073	0.303414	0.0680745
ENSG00000116161	CACYBP	calcyclin binding protein [Source:HGNC Symbol;Acc:HGNC:30423]	1.62764	1.06964	0.605647		1.03538	1.06964	-0.0469663
ENSG00000187535	IFT140	intraflagellar transport 140 [Source:HGNC Symbol;Acc:HGNC:29077]	0.838278	0.550959	0.605482		0.523812	0.550959	-0.0728971
ENSG00000175063	UBE2C	ubiquitin-conjugating enzyme E2C [Source:HGNC Symbol;Acc:HGNC:15937]	1.27954	0.841113	0.605252		0.946205	0.841113	0.169854
ENSG00000165806	CASP7	caspase 7, apoptosis-related cysteine peptidase [Source:HGNC Symbol;Acc:HGNC:1508]	1.06865	0.702551	0.605121		0.545627	0.702551	-0.364688
ENSG00000197283	SYNGAP1	synaptic Ras GTPase activating protein 1 [Source:HGNC Symbol;Acc:HGNC:11497]	1.45667	0.957828	0.604836		1.06651	0.957828	0.155055
ENSG00000090539	CHRD	chordin [Source:HGNC Symbol;Acc:HGNC:1949]	0.94013	0.618299	0.604555		0.793145	0.618299	0.359279
ENSG00000126705	AHDC1	AT hook, DNA binding motif, containing 1 [Source:HGNC Symbol;Acc:HGNC:25230]	1.32143	0.869205	0.604334		0.881031	0.869205	0.0194961
ENSG00000112079	STK38	serine/threonine kinase 38 [Source:HGNC Symbol;Acc:HGNC:17847]	1.2248	0.805668	0.604285		0.71888	0.805668	-0.164435
ENSG00000099995	SF3A1	splicing factor 3a, subunit 1, 120kDa [Source:HGNC Symbol;Acc:HGNC:10765]	1.30322	0.85735	0.604125		1.11986	0.85735	0.385359
ENSG00000067082	KLF6	Kruppel-like factor 6 [Source:HGNC Symbol;Acc:HGNC:2235]	2.4972	1.64286	0.6041		2.33064	1.64286	0.504511
ENSG00000113328	CCNG1	cyclin G1 [Source:HGNC Symbol;Acc:HGNC:1592]	1.66499	1.09554	0.603868		0.927893	1.09554	-0.239615
ENSG00000102531	FNDC3A	fibronectin type III domain containing 3A [Source:HGNC Symbol;Acc:HGNC:20296]	2.04819	1.34769	0.603862		1.11892	1.34769	-0.268382
ENSG00000121966	CXCR4	chemokine (C-X-C motif) receptor 4 [Source:HGNC Symbol;Acc:HGNC:2561]	2.1461	1.4123	0.603666		0.861884	1.4123	-0.712486
ENSG00000082153	BZW1	basic leucine zipper and W2 domains 1 [Source:HGNC Symbol;Acc:HGNC:18380]	1.57105	1.03393	0.603592		1.04976	1.03393	0.0219201
ENSG00000005100	DHX33	DEAH (Asp-Glu-Ala-His) box polypeptide 33 [Source:HGNC Symbol;Acc:HGNC:16718]	0.98341	0.647337	0.603276		0.687697	0.647337	0.0872555
ENSG00000156052	GNAQ	guanine nucleotide binding protein (G protein), q polypeptide [Source:HGNC Symbol;Acc:HGNC:4390]	1.40104	0.922324	0.603157		0.966293	0.922324	0.0671871
ENSG00000153207	AHCTF1	AT hook containing transcription factor 1 [Source:HGNC Symbol;Acc:HGNC:24618]	1.39206	0.91661	0.602847		1.0803	0.91661	0.237057
ENSG00000069956	MAPK6	mitogen-activated protein kinase 6 [Source:HGNC Symbol;Acc:HGNC:6879]	2.18209	1.43683	0.602825		1.46541	1.43683	0.0284203
ENSG00000069869	NEDD4	neural precursor cell expressed, developmentally down-regulated 4, E3 ubiquitin protein ligase [Source:HGNC Symbol;Acc:HGNC:7727]	1.41343	0.930948	0.602424		1.06924	0.930948	0.199815
ENSG00000104218	CSPP1	centrosome and spindle pole associated protein 1 [Source:HGNC Symbol;Acc:HGNC:26193]	1.15939	0.763734	0.602227		0.867088	0.763734	0.183108
ENSG00000005436	GCFC2	GC-rich sequence DNA-binding factor 2 [Source:HGNC Symbol;Acc:HGNC:1317]	0.88052	0.580638	0.600715		0.660114	0.580638	0.185076
ENSG00000209082	MT-TL1	mitochondrially encoded tRNA leucine 1 (UUA/G) [Source:HGNC Symbol;Acc:HGNC:7490]	1.87202	1.23488	0.600223		1.05117	1.23488	-0.232375
ENSG00000172554	SNTG2	syntrophin, gamma 2 [Source:HGNC Symbol;Acc:HGNC:13741]	0.940484	0.620441	0.60011		0.797683	0.620441	0.362521
ENSG00000130706	ADRM1	adhesion regulating molecule 1 [Source:HGNC Symbol;Acc:HGNC:15759]	1.47836	0.975302	0.60008		0.975882	0.975302	0.000857766
ENSG00000050820	BCAR1	breast cancer anti-estrogen resistance 1 [Source:HGNC Symbol;Acc:HGNC:971]	1.11838	0.737834	0.600038		0.678212	0.737834	-0.121561
ENSG00000152484	USP12	ubiquitin specific peptidase 12 [Source:HGNC Symbol;Acc:HGNC:20485]	1.68319	1.11053	0.599953		0.952816	1.11053	-0.220977
ENSG00000177485	ZBTB33	zinc finger and BTB domain containing 33 [Source:HGNC Symbol;Acc:HGNC:16682]	1.41213	0.931741	0.599874		1.2225	0.931741	0.391828
ENSG00000188859	FAM78B	family with sequence similarity 78, member B [Source:HGNC Symbol;Acc:HGNC:13495]	0.990784	0.653744	0.599843		0.621518	0.653744	-0.0729311
ENSG00000159164	SV2A	synaptic vesicle glycoprotein 2A [Source:HGNC Symbol;Acc:HGNC:20566]	1.39295	0.919155	0.599759		1.03881	0.919155	0.176548
ENSG00000156959	LHFPL4	lipoma HMGIC fusion partner-like 4 [Source:HGNC Symbol;Acc:HGNC:29568]	0.996949	0.657914	0.59962		0.648034	0.657914	-0.0218285
ENSG00000163013	FBXO41	F-box protein 41 [Source:HGNC Symbol;Acc:HGNC:29409]	1.1085	0.731535	0.599604		0.661051	0.731535	-0.146166
ENSG00000167528	ZNF641	zinc finger protein 641 [Source:HGNC Symbol;Acc:HGNC:31834]	0.777116	0.512871	0.599536		0.357743	0.512871	-0.519673
ENSG00000166833	NAV2	neuron navigator 2 [Source:HGNC Symbol;Acc:HGNC:15997]	1.40439	0.927095	0.599155		0.957644	0.927095	0.0467723
ENSG00000119280	C1orf198	chromosome 1 open reading frame 198 [Source:HGNC Symbol;Acc:HGNC:25900]	1.63075	1.07688	0.598677		0.796901	1.07688	-0.434387
ENSG00000077235	GTF3C1	general transcription factor IIIC, polypeptide 1, alpha 220kDa [Source:HGNC Symbol;Acc:HGNC:4664]	1.05794	0.698683	0.598547		0.821964	0.698683	0.234438
ENSG00000165782	TMEM55B	transmembrane protein 55B [Source:HGNC Symbol;Acc:HGNC:19299]	1.52927	1.00997	0.598534		1.1385	1.00997	0.172824
ENSG00000107140	TESK1	testis-specific kinase 1 [Source:HGNC Symbol;Acc:HGNC:11731]	1.39216	0.920246	0.597239		0.85144	0.920246	-0.112114
ENSG00000132405	TBC1D14	TBC1 domain family, member 14 [Source:HGNC Symbol;Acc:HGNC:29246]	0.92442	0.611064	0.597225		0.551021	0.611064	-0.149217
ENSG00000174695	TMEM167A	transmembrane protein 167A [Source:HGNC Symbol;Acc:HGNC:28330]	1.05306	0.696118	0.597179		0.735445	0.696118	0.079284
ENSG00000100034	PPM1F	protein phosphatase, Mg2+/Mn2+ dependent, 1F [Source:HGNC Symbol;Acc:HGNC:19388]	0.745886	0.493104	0.597064		0.503859	0.493104	0.0311275
ENSG00000162650	ATXN7L2	ataxin 7-like 2 [Source:HGNC Symbol;Acc:HGNC:28713]	0.870913	0.575835	0.596874		0.812357	0.575835	0.496459
ENSG00000155506	LARP1	La ribonucleoprotein domain family, member 1 [Source:HGNC Symbol;Acc:HGNC:29531]	1.17859	0.779502	0.596436		1.13542	0.779502	0.542602
ENSG00000186297	GABRA5	gamma-aminobutyric acid (GABA) A receptor, alpha 5 [Source:HGNC Symbol;Acc:HGNC:4079]	1.31879	0.872292	0.596338		1.12294	0.872292	0.364404
ENSG00000007384	RHBDF1	rhomboid 5 homolog 1 (Drosophila) [Source:HGNC Symbol;Acc:HGNC:20561]	1.23664	0.818262	0.595796		1.15211	0.818262	0.493639
ENSG00000155980	KIF5A	kinesin family member 5A [Source:HGNC Symbol;Acc:HGNC:6323]	1.42954	0.946119	0.595459		0.941367	0.946119	-0.00726325
ENSG00000204438	GPANK1	G patch domain and ankyrin repeats 1 [Source:HGNC Symbol;Acc:HGNC:13920]	0.834196	0.5521	0.595456		0.739872	0.5521	0.422345
ENSG00000128567	PODXL	podocalyxin-like [Source:HGNC Symbol;Acc:HGNC:9171]	0.895871	0.592964	0.595348		0.412055	0.592964	-0.525108
ENSG00000075275	CELSR1	cadherin, EGF LAG seven-pass G-type receptor 1 [Source:HGNC Symbol;Acc:HGNC:1850]	0.990793	0.655828	0.595265		0.912683	0.655828	0.476796
ENSG00000181350	LRRC75A	leucine rich repeat containing 75A [Source:HGNC Symbol;Acc:HGNC:32403]	2.31738	1.53394	0.595254		1.04436	1.53394	-0.554619
ENSG00000084676	NCOA1	nuclear receptor coactivator 1 [Source:HGNC Symbol;Acc:HGNC:7668]	1.42049	0.940634	0.594689		0.901603	0.940634	-0.0611398
ENSG00000265808	SEC22B	SEC22 vesicle trafficking protein homolog B (S. cerevisiae) (gene/pseudogene) [Source:HGNC Symbol;Acc:HGNC:10700]	1.66485	1.10274	0.594291		1.08288	1.10274	-0.0262298
ENSG00000136404	TM6SF1	transmembrane 6 superfamily member 1 [Source:HGNC Symbol;Acc:HGNC:11860]	1.40421	0.93021	0.59413		1.21769	0.93021	0.388514
ENSG00000180185	FAHD1	fumarylacetoacetate hydrolase domain containing 1 [Source:HGNC Symbol;Acc:HGNC:14169]	0.775696	0.51388	0.59406		0.421885	0.51388	-0.284581
ENSG00000108788	MLX	MLX, MAX dimerization protein [Source:HGNC Symbol;Acc:HGNC:11645]	1.00766	0.66774	0.593655		0.751789	0.66774	0.171042
ENSG00000108389	MTMR4	myotubularin related protein 4 [Source:HGNC Symbol;Acc:HGNC:7452]	0.871157	0.577368	0.593441		0.537704	0.577368	-0.102678
ENSG00000132522	GPS2	G protein pathway suppressor 2 [Source:HGNC Symbol;Acc:HGNC:4550]	1.3412	0.88928	0.592818		0.923365	0.88928	0.0542642
ENSG00000135686	KLHL36	kelch-like family member 36 [Source:HGNC Symbol;Acc:HGNC:17844]	1.05754	0.701298	0.592608		0.590076	0.701298	-0.249127
ENSG00000273611	ZNHIT3	zinc finger, HIT-type containing 3 [Source:HGNC Symbol;Acc:HGNC:12309]	0.961014	0.63734	0.592496		0.597708	0.63734	-0.0926203
ENSG00000165046	LETM2	leucine zipper-EF-hand containing transmembrane protein 2 [Source:HGNC Symbol;Acc:HGNC:14648]	1.48755	0.986567	0.592444		1.00688	0.986567	0.0294002
ENSG00000253352	TUG1	taurine up-regulated 1 (non-protein coding) [Source:HGNC Symbol;Acc:HGNC:26066]	0.954726	0.633241	0.592331		0.926604	0.633241	0.549197
ENSG00000213281	NRAS	neuroblastoma RAS viral (v-ras) oncogene homolog [Source:HGNC Symbol;Acc:HGNC:7989]	1.26994	0.842363	0.592249		0.813988	0.842363	-0.0494346
ENSG00000154719	MRPL39	mitochondrial ribosomal protein L39 [Source:HGNC Symbol;Acc:HGNC:14027]	1.31413	0.871857	0.591944		0.799233	0.871857	-0.125476
ENSG00000100147	CCDC134	coiled-coil domain containing 134 [Source:HGNC Symbol;Acc:HGNC:26185]	1.61056	1.06862	0.59181		0.88567	1.06862	-0.270913
ENSG00000140403	DNAJA4	DnaJ (Hsp40) homolog, subfamily A, member 4 [Source:HGNC Symbol;Acc:HGNC:14885]	1.77799	1.17984	0.591658		1.21461	1.17984	0.0419063
ENSG00000125505	MBOAT7	membrane bound O-acyltransferase domain containing 7 [Source:HGNC Symbol;Acc:HGNC:15505]	1.63439	1.0847	0.591452		1.22928	1.0847	0.180519
ENSG00000115419	GLS	glutaminase [Source:HGNC Symbol;Acc:HGNC:4331]	2.05021	1.36072	0.591397		1.82103	1.36072	0.420382
ENSG00000069275	NUCKS1	nuclear casein kinase and cyclin-dependent kinase substrate 1 [Source:HGNC Symbol;Acc:HGNC:29923]	1.02324	0.679215	0.591203		1.01028	0.679215	0.572817
ENSG00000163516	ANKZF1	ankyrin repeat and zinc finger domain containing 1 [Source:HGNC Symbol;Acc:HGNC:25527]	1.06733	0.708482	0.591199		0.617397	0.708482	-0.198533
ENSG00000177917	ARL6IP6	ADP-ribosylation factor-like 6 interacting protein 6 [Source:HGNC Symbol;Acc:HGNC:24048]	0.869252	0.577008	0.591184		1.05331	0.577008	0.868268
ENSG00000109736	MFSD10	major facilitator superfamily domain containing 10 [Source:HGNC Symbol;Acc:HGNC:16894]	1.16046	0.770418	0.590985		0.746068	0.770418	-0.0463344
ENSG00000137845	ADAM10	ADAM metallopeptidase domain 10 [Source:HGNC Symbol;Acc:HGNC:188]	1.04372	0.692921	0.590978		0.920295	0.692921	0.409405
ENSG00000197601	FAR1	fatty acyl CoA reductase 1 [Source:HGNC Symbol;Acc:HGNC:26222]	1.69683	1.12657	0.590908		1.15083	1.12657	0.030736
ENSG00000105088	OLFM2	olfactomedin 2 [Source:HGNC Symbol;Acc:HGNC:17189]	1.50338	0.998594	0.590241		0.979104	0.998594	-0.0284364
ENSG00000065154	OAT	ornithine aminotransferase [Source:HGNC Symbol;Acc:HGNC:8091]	1.70208	1.13069	0.590091		1.3998	1.13069	0.308017
ENSG00000166167	BTRC	beta-transducin repeat containing E3 ubiquitin protein ligase [Source:HGNC Symbol;Acc:HGNC:1144]	1.09492	0.727498	0.589814		0.712392	0.727498	-0.0302726
ENSG00000047315	POLR2B	polymerase (RNA) II (DNA directed) polypeptide B, 140kDa [Source:HGNC Symbol;Acc:HGNC:9188]	1.27121	0.844633	0.589799		0.994324	0.844633	0.235391
ENSG00000163624	CDS1	CDP-diacylglycerol synthase (phosphatidate cytidylyltransferase) 1 [Source:HGNC Symbol;Acc:HGNC:1800]	2.02088	1.34281	0.589735		1.60766	1.34281	0.259714
ENSG00000079999	KEAP1	kelch-like ECH-associated protein 1 [Source:HGNC Symbol;Acc:HGNC:23177]	0.825084	0.548302	0.589571		0.475768	0.548302	-0.204712
ENSG00000121871	SLITRK3	SLIT and NTRK-like family, member 3 [Source:HGNC Symbol;Acc:HGNC:23501]	0.621457	0.413195	0.58883		0.691454	0.413195	0.742808
ENSG00000196628	TCF4	transcription factor 4 [Source:HGNC Symbol;Acc:HGNC:11634]	1.39367	0.926733	0.588669		1.11997	0.926733	0.273239
ENSG00000172985	SH3RF3	SH3 domain containing ring finger 3 [Source:HGNC Symbol;Acc:HGNC:24699]	1.6813	1.11814	0.588478		1.5881	1.11814	0.506205
ENSG00000163870	TPRA1	transmembrane protein, adipocyte asscociated 1 [Source:HGNC Symbol;Acc:HGNC:30413]	1.21506	0.808151	0.588327		0.816243	0.808151	0.0143747
ENSG00000139514	SLC7A1	solute carrier family 7 (cationic amino acid transporter, y+ system), member 1 [Source:HGNC Symbol;Acc:HGNC:11057]	2.75586	1.83338	0.587997		4.22085	1.83338	1.20303
ENSG00000198169	ZNF251	zinc finger protein 251 [Source:HGNC Symbol;Acc:HGNC:13045]	1.00533	0.66884	0.587931		0.662121	0.66884	-0.0145675
ENSG00000152404	CWF19L2	CWF19-like 2, cell cycle control (S. pombe) [Source:HGNC Symbol;Acc:HGNC:26508]	1.15701	0.770273	0.586957		0.735396	0.770273	-0.0668481
ENSG00000136002	ARHGEF4	Rho guanine nucleotide exchange factor (GEF) 4 [Source:HGNC Symbol;Acc:HGNC:684]	0.986915	0.657164	0.586673		0.70669	0.657164	0.104824
ENSG00000187961	KLHL17	kelch-like family member 17 [Source:HGNC Symbol;Acc:HGNC:24023]	1.23103	0.819746	0.586623		0.715713	0.819746	-0.195795
ENSG00000142002	DPP9	dipeptidyl-peptidase 9 [Source:HGNC Symbol;Acc:HGNC:18648]	1.19025	0.792615	0.586574		0.801082	0.792615	0.0153283
ENSG00000185453	C19orf68	chromosome 19 open reading frame 68 [Source:HGNC Symbol;Acc:HGNC:34495]	0.838077	0.558145	0.586443		0.58049	0.558145	0.0566324
ENSG00000164902	PHAX	phosphorylated adaptor for RNA export [Source:HGNC Symbol;Acc:HGNC:10241]	0.889832	0.592667	0.586311		0.626854	0.592667	0.0809069
ENSG00000011566	MAP4K3	mitogen-activated protein kinase kinase kinase kinase 3 [Source:HGNC Symbol;Acc:HGNC:6865]	1.36818	0.911276	0.586296		1.11626	0.911276	0.292716
ENSG00000113161	HMGCR	3-hydroxy-3-methylglutaryl-CoA reductase [Source:HGNC Symbol;Acc:HGNC:5006]	2.64291	1.76117	0.585594		2.77661	1.76117	0.656792
ENSG00000086061	DNAJA1	DnaJ (Hsp40) homolog, subfamily A, member 1 [Source:HGNC Symbol;Acc:HGNC:5229]	1.75781	1.17139	0.585564		1.22575	1.17139	0.0654436
ENSG00000074855	ANO8	anoctamin 8 [Source:HGNC Symbol;Acc:HGNC:29329]	0.996975	0.664401	0.585503		0.585832	0.664401	-0.181568
ENSG00000156983	BRPF1	bromodomain and PHD finger containing, 1 [Source:HGNC Symbol;Acc:HGNC:14255]	1.40841	0.938726	0.585288		0.935665	0.938726	-0.00471272
ENSG00000130827	PLXNA3	plexin A3 [Source:HGNC Symbol;Acc:HGNC:9101]	1.19358	0.795558	0.585253		0.777142	0.795558	-0.03379
ENSG00000175216	CKAP5	cytoskeleton associated protein 5 [Source:HGNC Symbol;Acc:HGNC:28959]	1.03954	0.693073	0.584873		0.877533	0.693073	0.340446
ENSG00000204304	PBX2	pre-B-cell leukemia homeobox 2 [Source:HGNC Symbol;Acc:HGNC:8633]	0.869259	0.579607	0.584712		0.665692	0.579607	0.199779
ENSG00000110917	MLEC	malectin [Source:HGNC Symbol;Acc:HGNC:28973]	1.24287	0.82891	0.584392		0.893603	0.82891	0.108418
ENSG00000197872	FAM49A	family with sequence similarity 49, member A [Source:HGNC Symbol;Acc:HGNC:25373]	1.25136	0.834657	0.584247		0.630112	0.834657	-0.405575
ENSG00000104375	STK3	serine/threonine kinase 3 [Source:HGNC Symbol;Acc:HGNC:11406]	1.15866	0.772827	0.584245		0.824494	0.772827	0.093364
ENSG00000119878	CRIPT	cysteine-rich PDZ-binding protein [Source:HGNC Symbol;Acc:HGNC:14312]	1.4464	0.964755	0.584227		0.841287	0.964755	-0.197565
ENSG00000116983	HPCAL4	hippocalcin like 4 [Source:HGNC Symbol;Acc:HGNC:18212]	1.30016	0.867258	0.58416		0.446731	0.867258	-0.957055
ENSG00000103494	RPGRIP1L	RPGRIP1-like [Source:HGNC Symbol;Acc:HGNC:29168]	0.741951	0.494951	0.584039		0.505178	0.494951	0.0295077
ENSG00000123983	ACSL3	acyl-CoA synthetase long-chain family member 3 [Source:HGNC Symbol;Acc:HGNC:3570]	1.64726	1.09889	0.58402		1.22817	1.09889	0.160463
ENSG00000185518	SV2B	synaptic vesicle glycoprotein 2B [Source:HGNC Symbol;Acc:HGNC:16874]	1.03974	0.693648	0.58395		0.893925	0.693648	0.365951
ENSG00000104472	CHRAC1	chromatin accessibility complex 1 [Source:HGNC Symbol;Acc:HGNC:13544]	0.827179	0.551889	0.583821		0.633906	0.551889	0.19989
ENSG00000156453	PCDH1	protocadherin 1 [Source:HGNC Symbol;Acc:HGNC:8655]	0.755	0.503772	0.583704		0.708913	0.503772	0.492836
ENSG00000198546	ZNF511	zinc finger protein 511 [Source:HGNC Symbol;Acc:HGNC:28445]	1.3598	0.90741	0.583565		1.00286	0.90741	0.144289
ENSG00000116455	WDR77	WD repeat domain 77 [Source:HGNC Symbol;Acc:HGNC:29652]	1.02039	0.680932	0.583538		0.708882	0.680932	0.0580362
ENSG00000102781	KATNAL1	katanin p60 subunit A-like 1 [Source:HGNC Symbol;Acc:HGNC:28361]	1.19106	0.79519	0.582876		0.712055	0.79519	-0.15931
ENSG00000186862	PDZD7	PDZ domain containing 7 [Source:HGNC Symbol;Acc:HGNC:26257]	1.57817	1.05392	0.582488		1.24304	1.05392	0.238108
ENSG00000143870	PDIA6	protein disulfide isomerase family A, member 6 [Source:HGNC Symbol;Acc:HGNC:30168]	1.46444	0.978388	0.581874		0.895245	0.978388	-0.128125
ENSG00000159792	PSKH1	protein serine kinase H1 [Source:HGNC Symbol;Acc:HGNC:9529]	0.75993	0.507713	0.581854		0.496065	0.507713	-0.0334839
ENSG00000182504	CEP97	centrosomal protein 97kDa [Source:HGNC Symbol;Acc:HGNC:26244]	1.07884	0.72097	0.581465		0.667791	0.72097	-0.110544
ENSG00000119801	YPEL5	yippee-like 5 [Source:HGNC Symbol;Acc:HGNC:18329]	2.34988	1.57053	0.581338		1.27641	1.57053	-0.299155
ENSG00000133216	EPHB2	EPH receptor B2 [Source:HGNC Symbol;Acc:HGNC:3393]	1.05706	0.706731	0.580827		0.699338	0.706731	-0.0151702
ENSG00000183475	ASB7	ankyrin repeat and SOCS box containing 7 [Source:HGNC Symbol;Acc:HGNC:17182]	1.32175	0.8838	0.580654		0.808637	0.8838	-0.128227
ENSG00000075292	ZNF638	zinc finger protein 638 [Source:HGNC Symbol;Acc:HGNC:17894]	0.847001	0.56636	0.580645		0.926658	0.56636	0.710318
ENSG00000141456	PELP1	proline, glutamate and leucine rich protein 1 [Source:HGNC Symbol;Acc:HGNC:30134]	1.15706	0.773691	0.580637		0.829049	0.773691	0.0996995
ENSG00000160613	PCSK7	proprotein convertase subtilisin/kexin type 7 [Source:HGNC Symbol;Acc:HGNC:8748]	0.990504	0.662326	0.580621		0.91696	0.662326	0.469317
ENSG00000143919	CAMKMT	calmodulin-lysine N-methyltransferase [Source:HGNC Symbol;Acc:HGNC:26276]	1.38036	0.923131	0.58044		0.985042	0.923131	0.0936504
ENSG00000169718	DUS1L	dihydrouridine synthase 1-like [Source:HGNC Symbol;Acc:HGNC:30086]	0.87677	0.586867	0.579165		0.648888	0.586867	0.144935
ENSG00000143774	GUK1	guanylate kinase 1 [Source:HGNC Symbol;Acc:HGNC:4693]	1.68037	1.12483	0.579074		0.787356	1.12483	-0.514618
ENSG00000168675	LDLRAD4	low density lipoprotein receptor class A domain containing 4 [Source:HGNC Symbol;Acc:HGNC:1224]	1.24361	0.832571	0.578895		0.849258	0.832571	0.0286306
ENSG00000145016	KIAA0226	KIAA0226 [Source:HGNC Symbol;Acc:HGNC:28991]	1.5041	1.00704	0.578773		0.827735	1.00704	-0.282885
ENSG00000136051	KIAA1033	KIAA1033 [Source:HGNC Symbol;Acc:HGNC:29174]	0.844341	0.565446	0.578438		0.751905	0.565446	0.411161
ENSG00000164061	BSN	bassoon presynaptic cytomatrix protein [Source:HGNC Symbol;Acc:HGNC:1117]	1.24271	0.832398	0.578141		1.02288	0.832398	0.297285
ENSG00000104497	SNX16	sorting nexin 16 [Source:HGNC Symbol;Acc:HGNC:14980]	1.37716	0.922533	0.578025		0.843343	0.922533	-0.129482
ENSG00000163636	PSMD6	proteasome (prosome, macropain) 26S subunit, non-ATPase, 6 [Source:HGNC Symbol;Acc:HGNC:9564]	1.26776	0.849348	0.577853		0.760126	0.849348	-0.160116
ENSG00000112996	MRPS30	mitochondrial ribosomal protein S30 [Source:HGNC Symbol;Acc:HGNC:8769]	1.37222	0.919505	0.577578		1.08998	0.919505	0.245368
ENSG00000074696	HACD3	3-hydroxyacyl-CoA dehydratase 3 [Source:HGNC Symbol;Acc:HGNC:24175]	1.18315	0.792896	0.577432		0.74788	0.792896	-0.0843239
ENSG00000012963	UBR7	ubiquitin protein ligase E3 component n-recognin 7 (putative) [Source:HGNC Symbol;Acc:HGNC:20344]	1.0851	0.727411	0.576992		0.766881	0.727411	0.0762319
ENSG00000151640	DPYSL4	dihydropyrimidinase-like 4 [Source:HGNC Symbol;Acc:HGNC:3016]	1.30351	0.873925	0.576821		0.910386	0.873925	0.0589693
ENSG00000005483	KMT2E	lysine (K)-specific methyltransferase 2E [Source:HGNC Symbol;Acc:HGNC:18541]	1.05155	0.705035	0.576753		1.20682	0.705035	0.775444
ENSG00000188283	ZNF383	zinc finger protein 383 [Source:HGNC Symbol;Acc:HGNC:18609]	0.940973	0.630908	0.576723		0.723162	0.630908	0.19689
ENSG00000198431	TXNRD1	thioredoxin reductase 1 [Source:HGNC Symbol;Acc:HGNC:12437]	1.91993	1.28773	0.576222		0.848424	1.28773	-0.601972
ENSG00000006468	ETV1	ets variant 1 [Source:HGNC Symbol;Acc:HGNC:3490]	1.20441	0.807864	0.576147		1.14498	0.807864	0.503138
ENSG00000144524	COPS7B	COP9 signalosome subunit 7B [Source:HGNC Symbol;Acc:HGNC:16760]	0.979163	0.656961	0.575742		0.678668	0.656961	0.0468982
ENSG00000188026	RILPL1	Rab interacting lysosomal protein-like 1 [Source:HGNC Symbol;Acc:HGNC:26814]	1.30784	0.877636	0.575489		0.900425	0.877636	0.0369832
ENSG00000166068	SPRED1	sprouty-related, EVH1 domain containing 1 [Source:HGNC Symbol;Acc:HGNC:20249]	2.00951	1.34859	0.575388		1.44605	1.34859	0.100659
ENSG00000120256	LRP11	low density lipoprotein receptor-related protein 11 [Source:HGNC Symbol;Acc:HGNC:16936]	1.26983	0.852724	0.57449		0.757572	0.852724	-0.170695
ENSG00000156858	PRR14	proline rich 14 [Source:HGNC Symbol;Acc:HGNC:28458]	1.22043	0.819555	0.574481		1.00353	0.819555	0.292169
ENSG00000107021	TBC1D13	TBC1 domain family, member 13 [Source:HGNC Symbol;Acc:HGNC:25571]	1.16455	0.782216	0.574137		0.7631	0.782216	-0.0356952
ENSG00000139117	CPNE8	copine VIII [Source:HGNC Symbol;Acc:HGNC:23498]	1.06589	0.715955	0.574118		0.754354	0.715955	0.0753722
ENSG00000106608	URGCP	upregulator of cell proliferation [Source:HGNC Symbol;Acc:HGNC:30890]	0.72541	0.487354	0.573826		0.486242	0.487354	-0.00329621
ENSG00000168000	BSCL2	Berardinelli-Seip congenital lipodystrophy 2 (seipin) [Source:HGNC Symbol;Acc:HGNC:15832]	1.57023	1.05498	0.573764		0.969386	1.05498	-0.122073
ENSG00000143952	VPS54	vacuolar protein sorting 54 homolog (S. cerevisiae) [Source:HGNC Symbol;Acc:HGNC:18652]	1.1815	0.79388	0.573629		1.09641	0.79388	0.465798
ENSG00000120662	MTRF1	mitochondrial translational release factor 1 [Source:HGNC Symbol;Acc:HGNC:7469]	0.70885	0.47646	0.573125		0.36017	0.47646	-0.403679
ENSG00000101236	RNF24	ring finger protein 24 [Source:HGNC Symbol;Acc:HGNC:13779]	1.54415	1.038	0.573		0.852559	1.038	-0.283941
ENSG00000108175	ZMIZ1	zinc finger, MIZ-type containing 1 [Source:HGNC Symbol;Acc:HGNC:16493]	1.2793	0.860083	0.572807		0.936971	0.860083	0.123529
ENSG00000113805	CNTN3	contactin 3 (plasmacytoma associated) [Source:HGNC Symbol;Acc:HGNC:2173]	0.787648	0.529582	0.572698		0.736341	0.529582	0.475521
ENSG00000212864	RNF208	ring finger protein 208 [Source:HGNC Symbol;Acc:HGNC:25420]	1.37721	0.926089	0.572528		0.738746	0.926089	-0.326072
ENSG00000123091	RNF11	ring finger protein 11 [Source:HGNC Symbol;Acc:HGNC:10056]	1.98172	1.33279	0.572301		1.42558	1.33279	0.097095
ENSG00000142409	ZNF787	zinc finger protein 787 [Source:HGNC Symbol;Acc:HGNC:26998]	1.33719	0.899409	0.572153		0.868464	0.899409	-0.0505107
ENSG00000168397	ATG4B	autophagy related 4B, cysteine peptidase [Source:HGNC Symbol;Acc:HGNC:20790]	1.00621	0.676952	0.571803		0.656831	0.676952	-0.0435314
ENSG00000110218	PANX1	pannexin 1 [Source:HGNC Symbol;Acc:HGNC:8599]	1.16696	0.785434	0.57119		0.702139	0.785434	-0.161734
ENSG00000117505	DR1	down-regulator of transcription 1, TBP-binding (negative cofactor 2) [Source:HGNC Symbol;Acc:HGNC:3017]	1.29364	0.870758	0.571092		0.895797	0.870758	0.0409
ENSG00000171385	KCND3	potassium channel, voltage gated Shal related subfamily D, member 3 [Source:HGNC Symbol;Acc:HGNC:6239]	1.2412	0.835543	0.570953		0.938793	0.835543	0.168093
ENSG00000119537	KDSR	3-ketodihydrosphingosine reductase [Source:HGNC Symbol;Acc:HGNC:4021]	0.987879	0.665062	0.570845		0.712289	0.665062	0.0989726
ENSG00000073169	SELO	selenoprotein O [Source:EntrezGene;Acc:83642]	1.08346	0.729467	0.570733		0.666077	0.729467	-0.131153
ENSG00000213337	ANKRD39	ankyrin repeat domain 39 [Source:HGNC Symbol;Acc:HGNC:28640]	1.04009	0.700272	0.570715		0.570738	0.700272	-0.295088
ENSG00000119559	C19orf25	chromosome 19 open reading frame 25 [Source:HGNC Symbol;Acc:HGNC:26711]	1.07976	0.727337	0.570017		0.547249	0.727337	-0.410426
ENSG00000130208	APOC1	apolipoprotein C-I [Source:HGNC Symbol;Acc:HGNC:607]	1.76913	1.19183	0.56986		0.934871	1.19183	-0.350342
ENSG00000107833	NPM3	nucleophosmin/nucleoplasmin 3 [Source:HGNC Symbol;Acc:HGNC:7931]	1.12353	0.756962	0.569751		0.684822	0.756962	-0.144493
ENSG00000165801	ARHGEF40	Rho guanine nucleotide exchange factor (GEF) 40 [Source:HGNC Symbol;Acc:HGNC:25516]	1.1848	0.798371	0.569509		0.866515	0.798371	0.118167
ENSG00000083635	NUFIP1	nuclear fragile X mental retardation protein interacting protein 1 [Source:HGNC Symbol;Acc:HGNC:8057]	1.06953	0.720773	0.569364		0.724862	0.720773	0.00816103
[truncated: 9,303 more rows]
