# Supplementary material for: Evidence for evolutionary divergence of activity-dependent gene expression in developing neurons
Source: eLife journal article supplement (doi:10.7554/elife.20337), 2016-10-01
Supplement: supp [file elife-20337-supp-v1.zip › elife_poa_e20337_Figure_2_figure_supplement_1.pdf]

**Figure 2-figure supplement 1.**

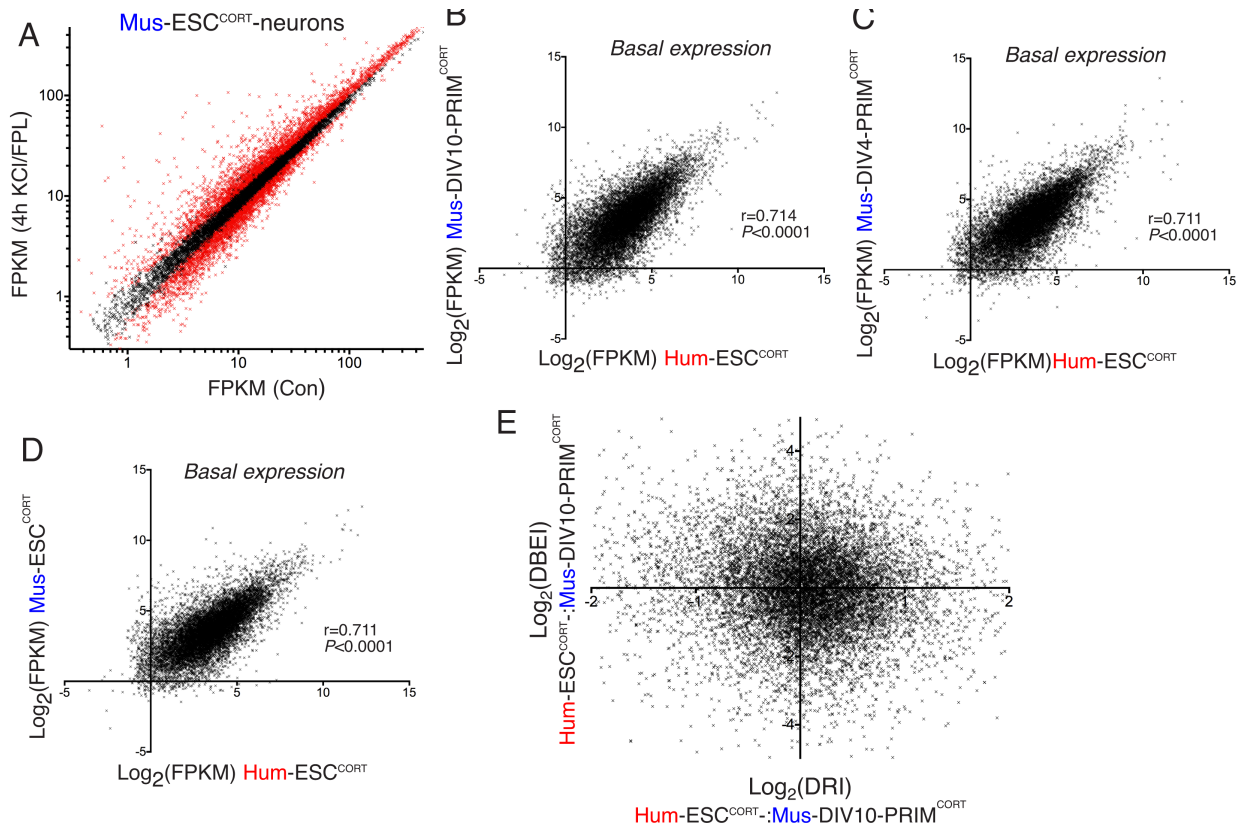

**Figure 2-figure supplement 1.** **A)** Normalised RNA-seq read density (FPKM) mapping to each gene in RNA extracted from control vs. KCI/FPL-treated Mus-ESC<sup>CORT</sup>-neurons is shown (n=3 independent biological replicates). Genes whose expression was significantly altered by KCI/FPL treatment (Benjamini-Hochberg-adjusted p-value <0.05, calculated within DESeq2) are highlighted in red. **B-D)** Correlation of basal gene expression (Log<sub>2</sub>(FPKM)) across 11,302 ortholog pairs in Hum-ESC<sup>CORT</sup>-neurons vs. DIV4 Mus-PRIM<sup>CORT</sup>-neurons (B), DIV4 Mus-PRIM<sup>CORT</sup>-neurons (C) and Mus-ESC<sup>CORT</sup>-neurons (D). **E)** For each of the 11,302 orthologous pairs, the Log<sub>2</sub>(DRI) Hum-ESC<sup>CORT</sup>-vs. DIV10 Mus-PRIM<sup>CORT</sup>-neurons (i.e. DRIs from Figure 1-figure supplement 1e) were plotted against the Log<sub>2</sub>(DBEI), where DBI (differential basal expression index) is the ratio of basal expression in Hum-ESC<sup>CORT</sup>-vs. DIV10 Mus-PRIM<sup>CORT</sup>-neurons.
