# Supplementary material for: Evidence for evolutionary divergence of activity-dependent gene expression in developing neurons
Source: eLife journal article supplement (doi:10.7554/elife.20337), 2016-10-01
Supplement: supp [file elife-20337-supp-v1.zip › elife_poa_e20337_Figure_2_source_data_1.xlsx]

## Sheet: Fig. 2e-g
human_gene	human_gene_name	human_description	Fold-Change in Hum-ESC-neurons	Deseq2_padj	MOUSE	mouse_gene	mouse_gene_name	mouse_description	Fold-Change in Mus-DIV10-primary-neurons	Deseq2_padj	Fold-Change in Mus-DIV4-primary-neurons	Deseq2_padj	Fold-Change in Mus-ESC-neurons	Deseq2_padj
ENSG00000174576	NPAS4	neuronal PAS domain protein 4 [Source:HGNC Symbol;Acc:HGNC:18983]	161.056	1.21896e-54		ENSMUSG00000045903	Npas4	neuronal PAS domain protein 4 [Source:MGI Symbol;Acc:MGI:2664186]	99.4084	4.11902e-182	370.915	0	95.7297	5.68794e-215
ENSG00000125740	FOSB	FBJ murine osteosarcoma viral oncogene homolog B [Source:HGNC Symbol;Acc:HGNC:3797]	88.3292	7.66651e-13		ENSMUSG00000003545	Fosb	FBJ osteosarcoma oncogene B [Source:MGI Symbol;Acc:MGI:95575]	403.993	0	2264.27	0	304.701	3.81767e-298
ENSG00000135625	EGR4	early growth response 4 [Source:HGNC Symbol;Acc:HGNC:3241]	75.2244	6.0156e-23		ENSMUSG00000071341	Egr4	early growth response 4 [Source:MGI Symbol;Acc:MGI:99252]	51.596	3.76707e-59	408.1	3.24314e-63	57.6132	8.58735e-33
ENSG00000170345	FOS	FBJ murine osteosarcoma viral oncogene homolog [Source:HGNC Symbol;Acc:HGNC:3796]	72.0019	3.89785e-29		ENSMUSG00000021250	Fos	FBJ osteosarcoma oncogene [Source:MGI Symbol;Acc:MGI:95574]	158.914	4.86879e-68	419.492	2.13435e-151	94.0661	5.95852e-85
ENSG00000171223	JUNB	jun B proto-oncogene [Source:HGNC Symbol;Acc:HGNC:6205]	54.9937	3.27473e-12		ENSMUSG00000052837	Junb	jun B proto-oncogene [Source:MGI Symbol;Acc:MGI:96647]	56.4004	2.62062e-179	103.485	1.078e-182	22.0043	3.54032e-31
ENSG00000211568	MIR670	microRNA 670 [Source:HGNC Symbol;Acc:HGNC:37304]	39.2989	1.36395e-07		ENSMUSG00000076335	Mir670	microRNA 670 [Source:MGI Symbol;Acc:MGI:3629629]	11.1327	0.00138952	25.4683	5.2595e-08	57.0555	0.000138008
ENSG00000075426	FOSL2	FOS-like antigen 2 [Source:HGNC Symbol;Acc:HGNC:3798]	34.3315	1.63504e-12		ENSMUSG00000029135	Fosl2	fos-like antigen 2 [Source:MGI Symbol;Acc:MGI:102858]	15.2887	2.49323e-92	30.9447	0	15.1208	7.85213e-23
ENSG00000144655	CSRNP1	cysteine-serine-rich nuclear protein 1 [Source:HGNC Symbol;Acc:HGNC:14300]	30.4216	3.97264e-13		ENSMUSG00000032515	Csrnp1	cysteine-serine-rich nuclear protein 1 [Source:MGI Symbol;Acc:MGI:2387989]	18.5627	1.97757e-128	23.9375	3.54661e-244	7.9957	3.60699e-13
ENSG00000179388	EGR3	early growth response 3 [Source:HGNC Symbol;Acc:HGNC:3240]	26.2577	1.28229e-12		ENSMUSG00000033730	Egr3	early growth response 3 [Source:MGI Symbol;Acc:MGI:1306780]	3.80006	2.16187e-22	22.6978	4.72769e-130	2.77437	1.08712e-07
ENSG00000164949	GEM	GTP binding protein overexpressed in skeletal muscle [Source:HGNC Symbol;Acc:HGNC:4234]	24.8533	5.63504e-12		ENSMUSG00000028214	Gem	GTP binding protein (gene overexpressed in skeletal muscle) [Source:MGI Symbol;Acc:MGI:99844]	9.29726	1.37453e-38	3.63899	3.75692e-60	14.0357	2.77016e-151
ENSG00000123358	NR4A1	nuclear receptor subfamily 4, group A, member 1 [Source:HGNC Symbol;Acc:HGNC:7980]	21.5237	2.68074e-81		ENSMUSG00000023034	Nr4a1	nuclear receptor subfamily 4, group A, member 1 [Source:MGI Symbol;Acc:MGI:1352454]	38.2273	1.7632e-155	186.318	7.40673e-127	26.8575	1.25424e-150
ENSG00000119508	NR4A3	nuclear receptor subfamily 4, group A, member 3 [Source:HGNC Symbol;Acc:HGNC:7982]	18.0561	1.08943e-104		ENSMUSG00000028341	Nr4a3	nuclear receptor subfamily 4, group A, member 3 [Source:MGI Symbol;Acc:MGI:1352457]	9.85874	0	20.2394	0	10.2073	3.50754e-27
ENSG00000207870	MIR221	microRNA 221 [Source:HGNC Symbol;Acc:HGNC:31601]	15.1639			ENSMUSG00000065422	Mir221	microRNA 221 [Source:MGI Symbol;Acc:MGI:3619066]	2.40108	0.282556	1.78913	0.6294	2.37997
ENSG00000171246	NPTX1	neuronal pentraxin I [Source:HGNC Symbol;Acc:HGNC:7952]	15.013	1.28129e-53		ENSMUSG00000025582	Nptx1	neuronal pentraxin 1 [Source:MGI Symbol;Acc:MGI:107811]	1.59155	0.000313363	2.97159	2.76386e-30	9.19715	2.36546e-44
ENSG00000099860	GADD45B	growth arrest and DNA-damage-inducible, beta [Source:HGNC Symbol;Acc:HGNC:4096]	14.8966	2.92563e-08		ENSMUSG00000015312	Gadd45b	growth arrest and DNA-damage-inducible 45 beta [Source:MGI Symbol;Acc:MGI:107776]	39.1699	2.11123e-109	23.3898	8.24199e-43	6.10494	5.34257e-86
ENSG00000138166	DUSP5	dual specificity phosphatase 5 [Source:HGNC Symbol;Acc:HGNC:3071]	13.8318	7.96721e-10		ENSMUSG00000034765	Dusp5	dual specificity phosphatase 5 [Source:MGI Symbol;Acc:MGI:2685183]	7.91646	2.35608e-39	9.72305	8.11908e-91	12.8758	2.90239e-19
ENSG00000197019	SERTAD1	SERTA domain containing 1 [Source:HGNC Symbol;Acc:HGNC:17932]	13.0966	6.45999e-06		ENSMUSG00000008384	Sertad1	SERTA domain containing 1 [Source:MGI Symbol;Acc:MGI:1913438]	13.0889	3.80713e-67	19.2002	3.62675e-249	3.68791	1.53353e-36
ENSG00000162772	ATF3	activating transcription factor 3 [Source:HGNC Symbol;Acc:HGNC:785]	12.6955	7.32124e-06		ENSMUSG00000026628	Atf3	activating transcription factor 3 [Source:MGI Symbol;Acc:MGI:109384]	85.0426	6.05249e-37	7.67469	1.2102e-85	24.1699	4.54277e-20
ENSG00000185022	MAFF	v-maf avian musculoaponeurotic fibrosarcoma oncogene homolog F [Source:HGNC Symbol;Acc:HGNC:6780]	12.6878	7.2987e-16		ENSMUSG00000042622	Maff	v-maf musculoaponeurotic fibrosarcoma oncogene family, protein F (avian) [Source:MGI Symbol;Acc:MGI:96910]	51.4261	1.408e-207	86.3798	0	7.9457	2.7125e-17
ENSG00000111262	KCNA1	potassium channel, voltage gated shaker related subfamily A, member 1 [Source:HGNC Symbol;Acc:HGNC:6218]	12.6156	5.67455e-10		ENSMUSG00000047976	Kcna1	potassium voltage-gated channel, shaker-related subfamily, member 1 [Source:MGI Symbol;Acc:MGI:96654]	1.08472	0.790047	4.15182	1.99257e-34	5.12359	5.26523e-39
ENSG00000181773	GPR3	G protein-coupled receptor 3 [Source:HGNC Symbol;Acc:HGNC:4484]	10.4137	1.54175e-51		ENSMUSG00000049649	Gpr3	G-protein coupled receptor 3 [Source:MGI Symbol;Acc:MGI:101908]	7.19795	3.75901e-65	8.58548	9.67886e-35	25.5621	2.29127e-184
ENSG00000134531	EMP1	epithelial membrane protein 1 [Source:HGNC Symbol;Acc:HGNC:3333]	10.3801	1.09256e-05		ENSMUSG00000030208	Emp1	epithelial membrane protein 1 [Source:MGI Symbol;Acc:MGI:107941]	4.2454	4.09243e-05	1.71029	2.10286e-17	1.69687	1.03336e-31
ENSG00000186594	MIR22HG	MIR22 host gene [Source:HGNC Symbol;Acc:HGNC:28219]	10.0308	2.63894e-11		ENSMUSG00000085148	Mir22hg	Mir22 host gene (non-protein coding) [Source:MGI Symbol;Acc:MGI:1914348]	1.00211	0.952308	3.51588	5.74956e-56	2.72556	1.18541e-35
ENSG00000175592	FOSL1	FOS-like antigen 1 [Source:HGNC Symbol;Acc:HGNC:13718]	9.58141	8.62994e-06		ENSMUSG00000024912	Fosl1	fos-like antigen 1 [Source:MGI Symbol;Acc:MGI:107179]	3.31441	1.08637e-32	1.0924	0.615207	2.26604	7.84113e-08
ENSG00000101096	NFATC2	nuclear factor of activated T-cells, cytoplasmic, calcineurin-dependent 2 [Source:HGNC Symbol;Acc:HGNC:7776]	9.55076	1.44098e-05		ENSMUSG00000027544	Nfatc2	nuclear factor of activated T cells, cytoplasmic, calcineurin dependent 2 [Source:MGI Symbol;Acc:MGI:102463]	6.22698	1.13822e-68	9.87271	1.41812e-82	2.2439	1.4539e-16
ENSG00000104856	RELB	v-rel avian reticuloendotheliosis viral oncogene homolog B [Source:HGNC Symbol;Acc:HGNC:9956]	9.02962	1.09565e-24		ENSMUSG00000002983	Relb	avian reticuloendotheliosis viral (v-rel) oncogene related B [Source:MGI Symbol;Acc:MGI:103289]	2.09415	1.01601e-07	3.70376	5.52385e-24	1.71373	4.37634e-06
ENSG00000198576	ARC	activity-regulated cytoskeleton-associated protein [Source:HGNC Symbol;Acc:HGNC:648]	8.86566	6.82877e-06		ENSMUSG00000022602	Arc	activity regulated cytoskeletal-associated protein [Source:MGI Symbol;Acc:MGI:88067]	15.9603	1.01344e-54	11.1704	1.58025e-21	6.60126	5.49554e-92
ENSG00000176697	BDNF	brain-derived neurotrophic factor [Source:HGNC Symbol;Acc:HGNC:1033]	8.71414	3.98363e-72		ENSMUSG00000048482	Bdnf	brain derived neurotrophic factor [Source:MGI Symbol;Acc:MGI:88145]	14.944	3.50944e-132	35.4349	0	6.95339	4.89175e-198
ENSG00000175426	PCSK1	proprotein convertase subtilisin/kexin type 1 [Source:HGNC Symbol;Acc:HGNC:8743]	8.49534	2.90464e-62		ENSMUSG00000021587	Pcsk1	proprotein convertase subtilisin/kexin type 1 [Source:MGI Symbol;Acc:MGI:97511]	16.3957	7.76358e-174	104.794	1.00554e-160	13.2317	3.07781e-19
ENSG00000122877	EGR2	early growth response 2 [Source:HGNC Symbol;Acc:HGNC:3239]	8.4408	0.000246967		ENSMUSG00000037868	Egr2	early growth response 2 [Source:MGI Symbol;Acc:MGI:95296]	31.6487	2.25416e-136	160.739	0	4.50367	0.0017515
ENSG00000128564	VGF	VGF nerve growth factor inducible [Source:HGNC Symbol;Acc:HGNC:12684]	7.39095	1.7926e-74		ENSMUSG00000037428	Vgf	VGF nerve growth factor inducible [Source:MGI Symbol;Acc:MGI:1343180]	3.39208	3.98604e-14	16.9686	0	5.87183	4.83888e-22
ENSG00000171621	SPSB1	splA/ryanodine receptor domain and SOCS box containing 1 [Source:HGNC Symbol;Acc:HGNC:30628]	6.99343	0.000190363		ENSMUSG00000039911	Spsb1	splA/ryanodine receptor domain and SOCS box containing 1 [Source:MGI Symbol;Acc:MGI:1921896]	1.55077	0.00335752	1.6784	4.14024e-06	2.15888	1.032e-14
ENSG00000118985	ELL2	elongation factor, RNA polymerase II, 2 [Source:HGNC Symbol;Acc:HGNC:17064]	6.67285	1.01681e-07		ENSMUSG00000001542	Ell2	elongation factor RNA polymerase II 2 [Source:MGI Symbol;Acc:MGI:2183438]	4.73353	5.15281e-79	5.95248	1.88231e-87	3.23507	1.21493e-07
ENSG00000122254	HS3ST2	heparan sulfate (glucosamine) 3-O-sulfotransferase 2 [Source:HGNC Symbol;Acc:HGNC:5195]	6.52271	8.9715e-19		ENSMUSG00000046321	Hs3st2	heparan sulfate (glucosamine) 3-O-sulfotransferase 2 [Source:MGI Symbol;Acc:MGI:1333802]	1.24247	0.121098	1.43452	0.00348212	2.56192	8.65208e-23
ENSG00000179094	PER1	period circadian clock 1 [Source:HGNC Symbol;Acc:HGNC:8845]	6.18291	3.83298e-25		ENSMUSG00000020893	Per1	period circadian clock 1 [Source:MGI Symbol;Acc:MGI:1098283]	8.54943	6.6406e-149	13.917	0	5.99118	2.55693e-159
ENSG00000136826	KLF4	Kruppel-like factor 4 (gut) [Source:HGNC Symbol;Acc:HGNC:6348]	6.03655	4.18765e-15		ENSMUSG00000003032	Klf4	Kruppel-like factor 4 (gut) [Source:MGI Symbol;Acc:MGI:1342287]	97.0335	4.73559e-166	88.5248	0	2.13647	1.61198e-05
ENSG00000128285	MCHR1	melanin-concentrating hormone receptor 1 [Source:HGNC Symbol;Acc:HGNC:4479]	5.9918	0.000250657		ENSMUSG00000050164	Mchr1	melanin-concentrating hormone receptor 1 [Source:MGI Symbol;Acc:MGI:2180756]	1.0333	0.893794	1.34547	0.39359	12.6695	2.00347e-127
ENSG00000054967	RELT	RELT tumor necrosis factor receptor [Source:HGNC Symbol;Acc:HGNC:13764]	5.93585	1.0115e-26		ENSMUSG00000008318	Relt	RELT tumor necrosis factor receptor [Source:MGI Symbol;Acc:MGI:2443373]	1.72135	0.0111431	1.82899	5.9224e-08	4.43774	9.73706e-38
ENSG00000102393	GLA	galactosidase, alpha [Source:HGNC Symbol;Acc:HGNC:4296]	5.86684	3.61621e-25		ENSMUSG00000031266	Gla	galactosidase, alpha [Source:MGI Symbol;Acc:MGI:1347344]	15.5614	2.62552e-152	12.8837	2.16897e-65	6.30649	3.5103e-157
ENSG00000128965	CHAC1	ChaC glutathione-specific gamma-glutamylcyclotransferase 1 [Source:HGNC Symbol;Acc:HGNC:28680]	5.84968	0.00092238		ENSMUSG00000027313	Chac1	ChaC, cation transport regulator 1 [Source:MGI Symbol;Acc:MGI:1916315]	2.70106	1.58084e-08	5.38177	1.14927e-63	4.44797	6.48256e-80
ENSG00000267200	MIR132	microRNA 132 [Source:HGNC Symbol;Acc:HGNC:31516]	5.8393	0.0139284		ENSMUSG00000065537	Mir132	microRNA 132 [Source:MGI Symbol;Acc:MGI:2676817]	8.78006	2.93274e-05	120.987	4.7254e-30	30.1748	8.79332e-14
ENSG00000135750	KCNK1	potassium channel, two pore domain subfamily K, member 1 [Source:HGNC Symbol;Acc:HGNC:6272]	5.74274	3.03228e-08		ENSMUSG00000033998	Kcnk1	potassium channel, subfamily K, member 1 [Source:MGI Symbol;Acc:MGI:109322]	0.930657	0.550923	0.84115	0.043168	2.47983	1.23245e-40
ENSG00000172216	CEBPB	CCAAT/enhancer binding protein (C/EBP), beta [Source:HGNC Symbol;Acc:HGNC:1834]	5.6994	0.000355754		ENSMUSG00000056501	Cebpb	CCAAT/enhancer binding protein (C/EBP), beta [Source:MGI Symbol;Acc:MGI:88373]	7.34746	2.42119e-28	10.0499	3.4533e-44	3.41001	4.35197e-12
ENSG00000186480	INSIG1	insulin induced gene 1 [Source:HGNC Symbol;Acc:HGNC:6083]	5.62932	3.38285e-54		ENSMUSG00000045294	Insig1	insulin induced gene 1 [Source:MGI Symbol;Acc:MGI:1916289]	1.65729	2.27718e-05	3.19232	1.60619e-13	2.91423	7.03607e-97
ENSG00000006327	TNFRSF12A	tumor necrosis factor receptor superfamily, member 12A [Source:HGNC Symbol;Acc:HGNC:18152]	5.51964	0.000169965		ENSMUSG00000023905	Tnfrsf12a	tumor necrosis factor receptor superfamily, member 12a [Source:MGI Symbol;Acc:MGI:1351484]	7.11283	3.66794e-21	3.14481	1.28248e-16	5.59645	5.49554e-92
ENSG00000145506	NKD2	naked cuticle homolog 2 (Drosophila) [Source:HGNC Symbol;Acc:HGNC:17046]	5.4227	4.01938e-31		ENSMUSG00000021567	Nkd2	naked cuticle 2 homolog (Drosophila) [Source:MGI Symbol;Acc:MGI:1919543]	1.10721	0.749635	0.656865	1.33474e-06	1.74695	2.56955e-09
ENSG00000188981	MSANTD1	Myb/SANT-like DNA-binding domain containing 1 [Source:HGNC Symbol;Acc:HGNC:33741]	5.34898	5.88851e-36		ENSMUSG00000051246	Msantd1	Myb/SANT-like DNA-binding domain containing 1 [Source:MGI Symbol;Acc:MGI:2684990]	5.23446	7.63428e-37	6.57926	4.68351e-67	3.91082	1.41887e-20
ENSG00000099625	CBARP	calcium channel, voltage-dependent, beta subunit associated regulatory protein [Source:HGNC Symbol;Acc:HGNC:28617]	5.34159	2.09748e-22		ENSMUSG00000035640	Cbarp	calcium channel, voltage-dependent, beta subunit associated regulatory protein [Source:MGI Symbol;Acc:MGI:1354170]	0.969747	0.857348	1.18101	0.00468349	1.25996	6.48397e-08
ENSG00000116741	RGS2	regulator of G-protein signaling 2 [Source:HGNC Symbol;Acc:HGNC:9998]	5.30404	4.67885e-102		ENSMUSG00000026360	Rgs2	regulator of G-protein signaling 2 [Source:MGI Symbol;Acc:MGI:1098271]	4.50779	1.154e-64	10.0844	0	3.62636	1.39705e-137
ENSG00000163638	ADAMTS9	ADAM metallopeptidase with thrombospondin type 1 motif, 9 [Source:HGNC Symbol;Acc:HGNC:13202]	5.24925	1.97372e-15		ENSMUSG00000030022	Adamts9	a disintegrin-like and metallopeptidase (reprolysin type) with thrombospondin type 1 motif, 9 [Source:MGI Symbol;Acc:MGI:1916320]	3.97129	2.47191e-17	1.67814	1.1143e-11	0.848156	0.00821743
ENSG00000116717	GADD45A	growth arrest and DNA-damage-inducible, alpha [Source:HGNC Symbol;Acc:HGNC:4095]	5.19342	3.50489e-06		ENSMUSG00000036390	Gadd45a	growth arrest and DNA-damage-inducible 45 alpha [Source:MGI Symbol;Acc:MGI:107799]	3.61619	2.02826e-22	1.67899	0.00194694	2.19837	1.04386e-08
ENSG00000166592	RRAD	Ras-related associated with diabetes [Source:HGNC Symbol;Acc:HGNC:10446]	5.17328	9.90446e-09		ENSMUSG00000031880	Rrad	Ras-related associated with diabetes [Source:MGI Symbol;Acc:MGI:1930943]	21.621	2.14239e-47	9.33247	9.50086e-21	23.5606	3.64109e-17
ENSG00000120875	DUSP4	dual specificity phosphatase 4 [Source:HGNC Symbol;Acc:HGNC:3070]	5.09589	4.29935e-41		ENSMUSG00000031530	Dusp4	dual specificity phosphatase 4 [Source:MGI Symbol;Acc:MGI:2442191]	4.79898	2.14077e-56	12.2491	0	7.19783	1.01771e-32
ENSG00000130522	JUND	jun D proto-oncogene [Source:HGNC Symbol;Acc:HGNC:6206]	4.99087	1.03741e-08		ENSMUSG00000071076	Jund	jun D proto-oncogene [Source:MGI Symbol;Acc:MGI:96648]	4.46114	1.27082e-40	2.99578	7.97603e-90	2.55912	8.85289e-12
ENSG00000087074	PPP1R15A	protein phosphatase 1, regulatory subunit 15A [Source:HGNC Symbol;Acc:HGNC:14375]	4.93251	7.55956e-10		ENSMUSG00000040435	Ppp1r15a	protein phosphatase 1, regulatory (inhibitor) subunit 15A [Source:MGI Symbol;Acc:MGI:1927072]	16.3478	2.39904e-110	15.4279	9.90286e-64	6.90244	1.14531e-26
ENSG00000124225	PMEPA1	prostate transmembrane protein, androgen induced 1 [Source:HGNC Symbol;Acc:HGNC:14107]	4.90643	4.55468e-09		ENSMUSG00000038400	Pmepa1	prostate transmembrane protein, androgen induced 1 [Source:MGI Symbol;Acc:MGI:1929600]	2.12056	1.53224e-13	2.0124	9.35062e-31	2.28171	2.8663e-34
ENSG00000120738	EGR1	early growth response 1 [Source:HGNC Symbol;Acc:HGNC:3238]	4.81716	6.79568e-05		ENSMUSG00000038418	Egr1	early growth response 1 [Source:MGI Symbol;Acc:MGI:95295]	26.5268	0	59.144	0	3.66567	1.05451e-69
ENSG00000104267	CA2	carbonic anhydrase II [Source:HGNC Symbol;Acc:HGNC:1373]	4.59677	0.00219766		ENSMUSG00000027562	Car2	carbonic anhydrase 2 [Source:MGI Symbol;Acc:MGI:88269]	1.60528	0.00102142	1.38469	0.00164397	1.40428	0.00273102
ENSG00000119326	CTNNAL1	catenin (cadherin-associated protein), alpha-like 1 [Source:HGNC Symbol;Acc:HGNC:2512]	4.59152	5.44464e-07		ENSMUSG00000038816	Ctnnal1	catenin (cadherin associated protein), alpha-like 1 [Source:MGI Symbol;Acc:MGI:1859649]	1.29809	0.155807	1.0315	0.79774	1.2929	0.00030807
ENSG00000160789	LMNA	lamin A/C [Source:HGNC Symbol;Acc:HGNC:6636]	4.58936	1.9317e-06		ENSMUSG00000028063	Lmna	lamin A [Source:MGI Symbol;Acc:MGI:96794]	3.70803	4.11821e-50	3.90538	1.89084e-91	2.97184	1.21112e-111
ENSG00000166292	TMEM100	transmembrane protein 100 [Source:HGNC Symbol;Acc:HGNC:25607]	4.50051	6.5512e-15		ENSMUSG00000069763	Tmem100	transmembrane protein 100 [Source:MGI Symbol;Acc:MGI:1915138]	1.47721	0.468902	0.894547	0.252488	0.431085	2.21237e-06
ENSG00000130164	LDLR	low density lipoprotein receptor [Source:HGNC Symbol;Acc:HGNC:6547]	4.43166	8.21722e-28		ENSMUSG00000032193	Ldlr	low density lipoprotein receptor [Source:MGI Symbol;Acc:MGI:96765]	0.777664	0.0524254	1.13906	0.108597	1.83171	5.08667e-26
ENSG00000117868	ESYT2	extended synaptotagmin-like protein 2 [Source:HGNC Symbol;Acc:HGNC:22211]	4.42068	5.52201e-08		ENSMUSG00000021171	Esyt2	extended synaptotagmin-like protein 2 [Source:MGI Symbol;Acc:MGI:1261845]	1.47573	1.90552e-05	1.23895	0.000455857	1.53592	8.77796e-18
ENSG00000198355	PIM3	Pim-3 proto-oncogene, serine/threonine kinase [Source:HGNC Symbol;Acc:HGNC:19310]	4.39713	3.00361e-15		ENSMUSG00000035828	Pim3	proviral integration site 3 [Source:MGI Symbol;Acc:MGI:1355297]	2.03073	1.34408e-09	2.15675	1.19625e-36	2.2097	1.53399e-39
ENSG00000158792	SPATA2L	spermatogenesis associated 2-like [Source:HGNC Symbol;Acc:HGNC:28393]	4.39331	1.34764e-22		ENSMUSG00000033594	Spata2l	spermatogenesis associated 2-like [Source:MGI Symbol;Acc:MGI:1926029]	0.789525	0.192576	0.983157	0.903514	1.63246	2.07009e-05
ENSG00000108551	RASD1	RAS, dexamethasone-induced 1 [Source:HGNC Symbol;Acc:HGNC:15828]	4.39189	2.03626e-11		ENSMUSG00000049892	Rasd1	RAS, dexamethasone-induced 1 [Source:MGI Symbol;Acc:MGI:1270848]	5.20079	8.12965e-31	1.30126	0.592047	8.83276	9.06598e-37
ENSG00000177374	HIC1	hypermethylated in cancer 1 [Source:HGNC Symbol;Acc:HGNC:4909]	4.38006	7.60776e-13		ENSMUSG00000043099	Hic1	hypermethylated in cancer 1 [Source:MGI Symbol;Acc:MGI:1338010]	1.7821	0.0022023	1.50751	0.000604724	1.77184	2.06156e-13
ENSG00000166886	NAB2	NGFI-A binding protein 2 (EGR1 binding protein 2) [Source:HGNC Symbol;Acc:HGNC:7627]	4.37924	7.70587e-37		ENSMUSG00000025402	Nab2	Ngfi-A binding protein 2 [Source:MGI Symbol;Acc:MGI:107563]	1.04254	0.987409	1.02325	0.918029	2.00088	4.19375e-20
ENSG00000170214	ADRA1B	adrenoceptor alpha 1B [Source:HGNC Symbol;Acc:HGNC:278]	4.28919	7.37299e-15		ENSMUSG00000050541	Adra1b	adrenergic receptor, alpha 1b [Source:MGI Symbol;Acc:MGI:104774]	0.856586	0.306905	1.10151	0.747243	1.64168	1.50369e-12
ENSG00000153234	NR4A2	nuclear receptor subfamily 4, group A, member 2 [Source:HGNC Symbol;Acc:HGNC:7981]	4.28764	1.53692e-07		ENSMUSG00000026826	Nr4a2	nuclear receptor subfamily 4, group A, member 2 [Source:MGI Symbol;Acc:MGI:1352456]	39.2406	1.37592e-46	46.4328	5.99329e-73	23.0676	1.72263e-32
ENSG00000179148	ALOXE3	arachidonate lipoxygenase 3 [Source:HGNC Symbol;Acc:HGNC:13743]	4.27779	4.71151e-16		ENSMUSG00000020892	Aloxe3	arachidonate lipoxygenase 3 [Source:MGI Symbol;Acc:MGI:1345140]	2.25957	2.85905e-09	2.88946	4.44279e-11	1.36613	0.0825404
ENSG00000059804	SLC2A3	solute carrier family 2 (facilitated glucose transporter), member 3 [Source:HGNC Symbol;Acc:HGNC:11007]	4.25616	4.50831e-20		ENSMUSG00000003153	Slc2a3	solute carrier family 2 (facilitated glucose transporter), member 3 [Source:MGI Symbol;Acc:MGI:95757]	5.05281	2.07438e-53	13.0096	0	3.95858	4.31396e-14
ENSG00000153113	CAST	calpastatin [Source:HGNC Symbol;Acc:HGNC:1515]	4.23281	8.34168e-08		ENSMUSG00000021585	Cast	calpastatin [Source:MGI Symbol;Acc:MGI:1098236]	1.78866	0.00122795	1.20746	0.237878	1.46529	3.03596e-09
ENSG00000151470	C4orf33	chromosome 4 open reading frame 33 [Source:HGNC Symbol;Acc:HGNC:27025]	4.17285	1.31996e-06		ENSMUSG00000025766	D3Ertd751e	DNA segment, Chr 3, ERATO Doi 751, expressed [Source:MGI Symbol;Acc:MGI:1289213]	0.955861	0.870954	0.729967	0.06096	0.543313	3.93518e-05
ENSG00000165030	NFIL3	nuclear factor, interleukin 3 regulated [Source:HGNC Symbol;Acc:HGNC:7787]	4.13218	2.87974e-25		ENSMUSG00000056749	Nfil3	nuclear factor, interleukin 3, regulated [Source:MGI Symbol;Acc:MGI:109495]	13.1425	3.20289e-139	11.725	0	7.10187	7.92105e-51
ENSG00000112406	HECA	hdc homolog, cell cycle regulator [Source:HGNC Symbol;Acc:HGNC:21041]	4.103	2.4514e-23		ENSMUSG00000039879	Heca	headcase homolog (Drosophila) [Source:MGI Symbol;Acc:MGI:2685715]	7.25601	8.25521e-39	5.51389	1.57775e-255	4.34284	4.42664e-22
ENSG00000103966	EHD4	EH-domain containing 4 [Source:HGNC Symbol;Acc:HGNC:3245]	4.0673	6.11507e-21		ENSMUSG00000027293	Ehd4	EH-domain containing 4 [Source:MGI Symbol;Acc:MGI:1919619]	6.05766	3.42681e-43	2.08078	7.60055e-12	2.35082	2.69541e-31
ENSG00000156030	ELMSAN1	ELM2 and Myb/SANT-like domain containing 1 [Source:HGNC Symbol;Acc:HGNC:19853]	4.01608	0.000108359		ENSMUSG00000042507	Elmsan1	ELM2 and Myb/SANT-like domain containing 1 [Source:MGI Symbol;Acc:MGI:2685106]	3.31985	1.92758e-24	3.60041	2.39553e-62	2.15891	8.99058e-31
ENSG00000122012	SV2C	synaptic vesicle glycoprotein 2C [Source:HGNC Symbol;Acc:HGNC:30670]	4.00274	1.1563e-17		ENSMUSG00000051111	Sv2c	synaptic vesicle glycoprotein 2c [Source:MGI Symbol;Acc:MGI:1922459]	1.62309	0.00044077	5.82812	3.14175e-101	2.4893	1.21677e-09
ENSG00000159167	STC1	stanniocalcin 1 [Source:HGNC Symbol;Acc:HGNC:11373]	3.96951	2.42816e-39		ENSMUSG00000014813	Stc1	stanniocalcin 1 [Source:MGI Symbol;Acc:MGI:109131]	0.945768	0.656002	1.82397	6.03637e-09	2.19931	1.06566e-22
ENSG00000137331	IER3	immediate early response 3 [Source:HGNC Symbol;Acc:HGNC:5392]	3.8819	6.63916e-15		ENSMUSG00000003541	Ier3	immediate early response 3 [Source:MGI Symbol;Acc:MGI:104814]	3.96436	2.65781e-23	2.44274	3.64011e-07	3.86976	9.83053e-69
ENSG00000165355	FBXO33	F-box protein 33 [Source:HGNC Symbol;Acc:HGNC:19833]	3.88109	1.74451e-15		ENSMUSG00000035329	Fbxo33	F-box protein 33 [Source:MGI Symbol;Acc:MGI:1917861]	7.13241	9.79339e-156	6.5666	3.77523e-173	2.40909	1.44189e-27
ENSG00000055483	USP36	ubiquitin specific peptidase 36 [Source:HGNC Symbol;Acc:HGNC:20062]	3.85051	3.90048e-05		ENSMUSG00000033909	Usp36	ubiquitin specific peptidase 36 [Source:MGI Symbol;Acc:MGI:1919594]	4.58946	2.56588e-38	4.06086	2.44895e-125	2.67231	1.8753e-12
ENSG00000141750	STAC2	SH3 and cysteine rich domain 2 [Source:HGNC Symbol;Acc:HGNC:23990]	3.84141	5.45315e-28		ENSMUSG00000017400	Stac2	SH3 and cysteine rich domain 2 [Source:MGI Symbol;Acc:MGI:2144518]	1.13052	0.600203	0.936916	0.771869	2.9129	2.97077e-29
ENSG00000112972	HMGCS1	3-hydroxy-3-methylglutaryl-CoA synthase 1 (soluble) [Source:HGNC Symbol;Acc:HGNC:5007]	3.8205	1.93742e-23		ENSMUSG00000093930	Hmgcs1	3-hydroxy-3-methylglutaryl-Coenzyme A synthase 1 [Source:MGI Symbol;Acc:MGI:107592]	1.41105	0.00926475	2.89429	8.55979e-107	1.72026	2.60669e-29
ENSG00000157557	ETS2	v-ets avian erythroblastosis virus E26 oncogene homolog 2 [Source:HGNC Symbol;Acc:HGNC:3489]	3.806	7.95296e-18		ENSMUSG00000022895	Ets2	E26 avian leukemia oncogene 2, 3' domain [Source:MGI Symbol;Acc:MGI:95456]	1.05271	0.859937	1.05403	0.699309	2.23606	4.11848e-58
ENSG00000102096	PIM2	Pim-2 proto-oncogene, serine/threonine kinase [Source:HGNC Symbol;Acc:HGNC:8987]	3.80593	1.06441e-14		ENSMUSG00000031155	Pim2	proviral integration site 2 [Source:MGI Symbol;Acc:MGI:97587]	1.26742	0.0105279	1.54233	8.63946e-07	1.45669	0.119045
ENSG00000134294	SLC38A2	solute carrier family 38, member 2 [Source:HGNC Symbol;Acc:HGNC:13448]	3.78562	6.57847e-48		ENSMUSG00000022462	Slc38a2	solute carrier family 38, member 2 [Source:MGI Symbol;Acc:MGI:1915010]	2.31668	6.72403e-18	4.69854	4.49186e-117	3.18009	2.9291e-107
ENSG00000276600	RAB7B	RAB7B, member RAS oncogene family [Source:HGNC Symbol;Acc:HGNC:30513]	3.78533	8.07816e-05		ENSMUSG00000052688	Rab7b	RAB7B, member RAS oncogene family [Source:MGI Symbol;Acc:MGI:2442295]	0.732494	0.246722	0.690923	0.0175506	0.892688	0.521754
ENSG00000068137	PLEKHH3	pleckstrin homology domain containing, family H (with MyTH4 domain) member 3 [Source:HGNC Symbol;Acc:HGNC:26105]	3.77816	4.57549e-21		ENSMUSG00000035172	Plekhh3	pleckstrin homology domain containing, family H (with MyTH4 domain) member 3 [Source:MGI Symbol;Acc:MGI:2384950]	2.29456	2.95748e-08	1.9941	5.3345e-17	1.91003	1.8343e-20
ENSG00000250366	TUNAR	TCL1 upstream neural differentiation-associated RNA [Source:HGNC Symbol;Acc:HGNC:44088]	3.77257	1.04623e-120		ENSMUSG00000097929	Tunar	Tcl1 upstream neural differentiation associated RNA [Source:MGI Symbol;Acc:MGI:1917202]	0.980423	0.884113	0.764501	0.00481615	1.29478	4.86232e-05
ENSG00000171174	RBKS	ribokinase [Source:HGNC Symbol;Acc:HGNC:30325]	3.75953	0.0132043		ENSMUSG00000029136	Rbks	ribokinase [Source:MGI Symbol;Acc:MGI:1918586]	0.84541	0.673122	1.75618	0.0371967	0.602045	0.256576
ENSG00000172572	PDE3A	phosphodiesterase 3A, cGMP-inhibited [Source:HGNC Symbol;Acc:HGNC:8778]	3.75681	4.72311e-17		ENSMUSG00000041741	Pde3a	phosphodiesterase 3A, cGMP inhibited [Source:MGI Symbol;Acc:MGI:1860764]	3.08468	6.82269e-21	2.34214	3.98122e-32	1.65778	8.48816e-16
ENSG00000012660	ELOVL5	ELOVL fatty acid elongase 5 [Source:HGNC Symbol;Acc:HGNC:21308]	3.74525	3.15293e-14		ENSMUSG00000032349	Elovl5	ELOVL family member 5, elongation of long chain fatty acids (yeast) [Source:MGI Symbol;Acc:MGI:1916051]	2.78439	1.54401e-62	2.47621	4.95802e-77	2.44223	2.87969e-85
ENSG00000110721	CHKA	choline kinase alpha [Source:HGNC Symbol;Acc:HGNC:1937]	3.70589	4.80365e-19		ENSMUSG00000024843	Chka	choline kinase alpha [Source:MGI Symbol;Acc:MGI:107760]	4.15389	2.9047e-75	3.59994	3.40752e-113	4.05398	4.41077e-111
ENSG00000008405	CRY1	cryptochrome circadian clock 1 [Source:HGNC Symbol;Acc:HGNC:2384]	3.70302	1.81528e-05		ENSMUSG00000020038	Cry1	cryptochrome 1 (photolyase-like) [Source:MGI Symbol;Acc:MGI:1270841]	2.53047	6.10191e-14	2.4184	2.11293e-54	2.00462	1.05589e-31
ENSG00000134480	CCNH	cyclin H [Source:HGNC Symbol;Acc:HGNC:1594]	3.67807	1.08527e-13		ENSMUSG00000021548	Ccnh	cyclin H [Source:MGI Symbol;Acc:MGI:1913921]	0.868252	0.167324	0.811821	0.00297617	0.79013	0.00074647
ENSG00000105722	ERF	Ets2 repressor factor [Source:HGNC Symbol;Acc:HGNC:3444]	3.65438	4.39249e-05		ENSMUSG00000040857	Erf	Ets2 repressor factor [Source:MGI Symbol;Acc:MGI:109637]	7.07781	2.71542e-161	6.82674	1.32007e-175	3.41298	3.74544e-71
ENSG00000117143	UAP1	UDP-N-acetylglucosamine pyrophosphorylase 1 [Source:HGNC Symbol;Acc:HGNC:12457]	3.63377	8.50198e-26		ENSMUSG00000026670	Uap1	UDP-N-acetylglucosamine pyrophosphorylase 1 [Source:MGI Symbol;Acc:MGI:1334459]	0.977211	0.899216	1.15286	0.0477317	1.55151	8.98238e-16
ENSG00000186479	RGS7BP	regulator of G-protein signaling 7 binding protein [Source:HGNC Symbol;Acc:HGNC:23271]	3.63347	4.19622e-11		ENSMUSG00000021719	Rgs7bp	regulator of G-protein signalling 7 binding protein [Source:MGI Symbol;Acc:MGI:106334]	1.67547	6.91495e-14	2.49955	4.27969e-45	2.47038	5.33344e-28
ENSG00000143153	ATP1B1	ATPase, Na+/K+ transporting, beta 1 polypeptide [Source:HGNC Symbol;Acc:HGNC:804]	3.62789	1.31733e-54		ENSMUSG00000026576	Atp1b1	ATPase, Na+/K+ transporting, beta 1 polypeptide [Source:MGI Symbol;Acc:MGI:88108]	1.16758	0.10487	1.64303	9.45342e-23	1.3224	1.66457e-08
ENSG00000071205	ARHGAP10	Rho GTPase activating protein 10 [Source:HGNC Symbol;Acc:HGNC:26099]	3.6149	3.02837e-07		ENSMUSG00000037148	Arhgap10	Rho GTPase activating protein 10 [Source:MGI Symbol;Acc:MGI:1925764]	1.14067	0.455388	0.963595	0.836273	1.42485	5.17652e-06
ENSG00000173805	HAP1	huntingtin-associated protein 1 [Source:HGNC Symbol;Acc:HGNC:4812]	3.57943	7.26333e-12		ENSMUSG00000006930	Hap1	huntingtin-associated protein 1 [Source:MGI Symbol;Acc:MGI:1261831]	0.969892	0.858168	0.993368	0.94626	1.15093	0.000915079
ENSG00000108840	HDAC5	histone deacetylase 5 [Source:HGNC Symbol;Acc:HGNC:14068]	3.57009	1.8825e-22		ENSMUSG00000008855	Hdac5	histone deacetylase 5 [Source:MGI Symbol;Acc:MGI:1333784]	2.51801	6.858e-31	4.08957	1.01074e-24	4.1822	2.71789e-144
ENSG00000162975	KCNF1	potassium channel, voltage gated modifier subfamily F, member 1 [Source:HGNC Symbol;Acc:HGNC:6246]	3.54251	3.57607e-05		ENSMUSG00000051726	Kcnf1	potassium voltage-gated channel, subfamily F, member 1 [Source:MGI Symbol;Acc:MGI:2687399]	2.3262	2.49609e-20	4.0484	9.22854e-141	2.86354	3.91262e-28
ENSG00000112182	BACH2	BTB and CNC homology 1, basic leucine zipper transcription factor 2 [Source:HGNC Symbol;Acc:HGNC:14078]	3.5292	0.000159591		ENSMUSG00000040270	Bach2	BTB and CNC homology 2 [Source:MGI Symbol;Acc:MGI:894679]	2.02941	7.23835e-10	1.61793	1.15727e-18	2.52503	5.33827e-43
ENSG00000204186	ZDBF2	zinc finger, DBF-type containing 2 [Source:HGNC Symbol;Acc:HGNC:29313]	3.52493	3.85511e-05		ENSMUSG00000027520	Zdbf2	zinc finger, DBF-type containing 2 [Source:MGI Symbol;Acc:MGI:1921134]	21.8116	1.24902e-88	19.5132	0	5.29441	6.89381e-22
ENSG00000197106	SLC6A17	solute carrier family 6 (neutral amino acid transporter), member 17 [Source:HGNC Symbol;Acc:HGNC:31399]	3.51171	1.56772e-40		ENSMUSG00000027894	Slc6a17	solute carrier family 6 (neurotransmitter transporter), member 17 [Source:MGI Symbol;Acc:MGI:2442535]	1.88934	3.873e-14	3.90219	9.21005e-88	2.87019	4.24677e-19
ENSG00000119986	AVPI1	arginine vasopressin-induced 1 [Source:HGNC Symbol;Acc:HGNC:30898]	3.50856	1.60443e-11		ENSMUSG00000018821	Avpi1	arginine vasopressin-induced 1 [Source:MGI Symbol;Acc:MGI:1916784]	2.687	6.06687e-06	1.17957	0.384126	1.51901	0.00182938
ENSG00000103257	SLC7A5	solute carrier family 7 (amino acid transporter light chain, L system), member 5 [Source:HGNC Symbol;Acc:HGNC:11063]	3.50766	5.34202e-12		ENSMUSG00000040010	Slc7a5	solute carrier family 7 (cationic amino acid transporter, y+ system), member 5 [Source:MGI Symbol;Acc:MGI:1298205]	1.98504	1.56391e-15	2.76714	3.62092e-96	1.99018	8.30024e-48
ENSG00000119737	GPR75	G protein-coupled receptor 75 [Source:HGNC Symbol;Acc:HGNC:4526]	3.50633	2.2748e-05		ENSMUSG00000043999	Gpr75	G protein-coupled receptor 75 [Source:MGI Symbol;Acc:MGI:2441843]	0.575449	0.000104066	0.706937	0.0684433	0.39383	9.149e-08
ENSG00000182372	CLN8	ceroid-lipofuscinosis, neuronal 8 [Source:HGNC Symbol;Acc:HGNC:2079]	3.48639	6.80527e-16		ENSMUSG00000026317	Cln8	ceroid-lipofuscinosis, neuronal 8 [Source:MGI Symbol;Acc:MGI:1349447]	2.22247	1.31959e-35	1.52274	6.56872e-09	1.98176	1.98757e-29
ENSG00000116285	ERRFI1	ERBB receptor feedback inhibitor 1 [Source:HGNC Symbol;Acc:HGNC:18185]	3.48269	0.000237038		ENSMUSG00000028967	Errfi1	ERBB receptor feedback inhibitor 1 [Source:MGI Symbol;Acc:MGI:1921405]	10.1454	2.01879e-116	5.96033	4.87084e-225	3.20613	1.58566e-71
ENSG00000100219	XBP1	X-box binding protein 1 [Source:HGNC Symbol;Acc:HGNC:12801]	3.46146	2.02457e-18		ENSMUSG00000020484	Xbp1	X-box binding protein 1 [Source:MGI Symbol;Acc:MGI:98970]	0.654314	3.40765e-08	1.00335	0.983846	1.01922	0.799704
ENSG00000069849	ATP1B3	ATPase, Na+/K+ transporting, beta 3 polypeptide [Source:HGNC Symbol;Acc:HGNC:806]	3.45917	1.9689e-32		ENSMUSG00000032412	Atp1b3	ATPase, Na+/K+ transporting, beta 3 polypeptide [Source:MGI Symbol;Acc:MGI:107788]	1.2105	0.157871	1.27754	3.5065e-05	1.4242	1.19215e-12
ENSG00000001630	CYP51A1	cytochrome P450, family 51, subfamily A, polypeptide 1 [Source:HGNC Symbol;Acc:HGNC:2649]	3.44048	1.39695e-14		ENSMUSG00000001467	Cyp51	cytochrome P450, family 51 [Source:MGI Symbol;Acc:MGI:106040]	2.98049	2.98936e-41	3.6476	5.57999e-109	4.0895	6.65844e-32
ENSG00000112773	FAM46A	family with sequence similarity 46, member A [Source:HGNC Symbol;Acc:HGNC:18345]	3.44003	1.8863e-12		ENSMUSG00000032265	Fam46a	family with sequence similarity 46, member A [Source:MGI Symbol;Acc:MGI:2670964]	13.0441	4.62611e-62	5.94915	4.06176e-83	1.98085	0.000390297
ENSG00000281398	SNHG4	small nucleolar RNA host gene 4 [Source:HGNC Symbol;Acc:HGNC:32964]	3.38588	0.00122874		ENSMUSG00000097769	Snhg4	small nucleolar RNA host gene 4 [Source:MGI Symbol;Acc:MGI:4937091]	0.626945	1.17208e-06	0.814022	0.0850028	1.27144	0.102228
ENSG00000187479	C11orf96	chromosome 11 open reading frame 96 [Source:HGNC Symbol;Acc:HGNC:38675]	3.37006	2.59724e-09		ENSMUSG00000087006	Gm13889	predicted gene 13889 [Source:MGI Symbol;Acc:MGI:3652053]	3.45877	5.05655e-17	1.33528	0.0684871	8.87055	7.14156e-43
ENSG00000157613	CREB3L1	cAMP responsive element binding protein 3-like 1 [Source:HGNC Symbol;Acc:HGNC:18856]	3.36335	1.80767e-12		ENSMUSG00000027230	Creb3l1	cAMP responsive element binding protein 3-like 1 [Source:MGI Symbol;Acc:MGI:1347062]	0.833354	0.360165	1.02322	0.932343	1.25424	4.4794e-05
ENSG00000141433	ADCYAP1	adenylate cyclase activating polypeptide 1 (pituitary) [Source:HGNC Symbol;Acc:HGNC:241]	3.35779	3.27505e-40		ENSMUSG00000024256	Adcyap1	adenylate cyclase activating polypeptide 1 [Source:MGI Symbol;Acc:MGI:105094]	5.34866	8.99721e-34	18.7804	0	5.09543	2.22159e-17
ENSG00000139793	MBNL2	muscleblind-like splicing regulator 2 [Source:HGNC Symbol;Acc:HGNC:16746]	3.35518	1.97446e-10		ENSMUSG00000022139	Mbnl2	muscleblind-like 2 [Source:MGI Symbol;Acc:MGI:2145597]	5.80038	1.1994e-42	7.10206	1.01224e-283	2.18946	3.45457e-40
ENSG00000113070	HBEGF	heparin-binding EGF-like growth factor [Source:HGNC Symbol;Acc:HGNC:3059]	3.35275	2.12285e-05		ENSMUSG00000024486	Hbegf	heparin-binding EGF-like growth factor [Source:MGI Symbol;Acc:MGI:96070]	2.92969	5.05358e-10	1.12202	0.267231	2.29183	5.86799e-27
ENSG00000177426	TGIF1	TGFB-induced factor homeobox 1 [Source:HGNC Symbol;Acc:HGNC:11776]	3.3431	3.70727e-09		ENSMUSG00000047407	Tgif1	TGFB-induced factor homeobox 1 [Source:MGI Symbol;Acc:MGI:1194497]	2.07477	0.000353121	1.53652	0.00248952	1.49809	8.75962e-06
ENSG00000137962	ARHGAP29	Rho GTPase activating protein 29 [Source:HGNC Symbol;Acc:HGNC:30207]	3.3104	4.00901e-09		ENSMUSG00000039831	Arhgap29	Rho GTPase activating protein 29 [Source:MGI Symbol;Acc:MGI:2443818]	0.814318	0.0420425	0.907937	0.279104	1.2041	8.87463e-05
ENSG00000116133	DHCR24	24-dehydrocholesterol reductase [Source:HGNC Symbol;Acc:HGNC:2859]	3.28923	8.66015e-18		ENSMUSG00000034926	Dhcr24	24-dehydrocholesterol reductase [Source:MGI Symbol;Acc:MGI:1922004]	0.85878	0.133571	0.74768	1.34922e-05	2.04022	3.64436e-41
ENSG00000171951	SCG2	secretogranin II [Source:HGNC Symbol;Acc:HGNC:10575]	3.28895	1.33229e-51		ENSMUSG00000050711	Scg2	secretogranin II [Source:MGI Symbol;Acc:MGI:103033]	5.45765	1.28452e-99	24.9638	3.86755e-66	2.66552	2.29023e-68
ENSG00000160179	ABCG1	ATP-binding cassette, sub-family G (WHITE), member 1 [Source:HGNC Symbol;Acc:HGNC:73]	3.28377	0.000142478		ENSMUSG00000024030	Abcg1	ATP-binding cassette, sub-family G (WHITE), member 1 [Source:MGI Symbol;Acc:MGI:107704]	0.39969	1.29799e-11	0.679571	7.83615e-06	0.603305	6.2521e-06
ENSG00000128016	ZFP36	ZFP36 ring finger protein [Source:HGNC Symbol;Acc:HGNC:12862]	3.27368	4.39284e-05		ENSMUSG00000044786	Zfp36	zinc finger protein 36 [Source:MGI Symbol;Acc:MGI:99180]	6.13877	8.60105e-20	1.43298	0.107012	2.24464	4.62894e-12
ENSG00000175866	BAIAP2	BAI1-associated protein 2 [Source:HGNC Symbol;Acc:HGNC:947]	3.27232	7.17046e-05		ENSMUSG00000025372	Baiap2	brain-specific angiogenesis inhibitor 1-associated protein 2 [Source:MGI Symbol;Acc:MGI:2137336]	1.86325	2.1947e-08	4.10536	1.43831e-17	2.747	8.85135e-11
ENSG00000065911	MTHFD2	methylenetetrahydrofolate dehydrogenase (NADP+ dependent) 2, methenyltetrahydrofolate cyclohydrolase [Source:HGNC Symbol;Acc:HGNC:7434]	3.27149	0.00392642		ENSMUSG00000005667	Mthfd2	methylenetetrahydrofolate dehydrogenase (NAD+ dependent), methenyltetrahydrofolate cyclohydrolase [Source:MGI Symbol;Acc:MGI:1338850]	2.82674	2.56883e-14	6.27562	1.02461e-231	2.56367	1.96454e-67
ENSG00000109084	TMEM97	transmembrane protein 97 [Source:HGNC Symbol;Acc:HGNC:28106]	3.26619	9.4715e-43		ENSMUSG00000037278	Tmem97	transmembrane protein 97 [Source:MGI Symbol;Acc:MGI:1916321]	0.914466	0.533541	1.022	0.833524	1.29162	0.00100883
ENSG00000171813	PWWP2B	PWWP domain containing 2B [Source:HGNC Symbol;Acc:HGNC:25150]	3.2484	3.08589e-20		ENSMUSG00000060260	Pwwp2b	PWWP domain containing 2B [Source:MGI Symbol;Acc:MGI:2142008]	1.27085	0.292232	1.63558	0.0030609	1.66961	6.53395e-07
ENSG00000067064	IDI1	isopentenyl-diphosphate delta isomerase 1 [Source:HGNC Symbol;Acc:HGNC:5387]	3.23935	1.54114e-82		ENSMUSG00000058258	Idi1	isopentenyl-diphosphate delta isomerase [Source:MGI Symbol;Acc:MGI:2442264]	1.79466	9.7669e-11	2.80815	4.41559e-65	2.52381	1.29316e-40
ENSG00000167550	RHEBL1	Ras homolog enriched in brain like 1 [Source:HGNC Symbol;Acc:HGNC:21166]	3.21047	4.08351e-08		ENSMUSG00000023755	Rhebl1	Ras homolog enriched in brain like 1 [Source:MGI Symbol;Acc:MGI:1916409]	0.572703	4.6172e-06	0.787038	0.0060232	0.687216	0.00285845
ENSG00000102554	KLF5	Kruppel-like factor 5 (intestinal) [Source:HGNC Symbol;Acc:HGNC:6349]	3.20395	1.9466e-09		ENSMUSG00000005148	Klf5	Kruppel-like factor 5 [Source:MGI Symbol;Acc:MGI:1338056]	5.35682	8.49611e-46	8.21113	1.9149e-161	1.82248	1.10546e-14
ENSG00000139112	GABARAPL1	GABA(A) receptor-associated protein like 1 [Source:HGNC Symbol;Acc:HGNC:4068]	3.19116	2.55405e-13		ENSMUSG00000030161	Gabarapl1	gamma-aminobutyric acid (GABA) A receptor-associated protein-like 1 [Source:MGI Symbol;Acc:MGI:1914980]	1.4896	4.68523e-08	1.8504	1.93206e-28	1.73296	3.36515e-40
ENSG00000145414	NAF1	nuclear assembly factor 1 ribonucleoprotein [Source:HGNC Symbol;Acc:HGNC:25126]	3.16643	5.83761e-08		ENSMUSG00000014907	Naf1	nuclear assembly factor 1 homolog (S. cerevisiae) [Source:MGI Symbol;Acc:MGI:2682306]	1.80234	1.84205e-09	1.55328	9.21618e-07	1.38941	2.96964e-06
ENSG00000176845	METRNL	meteorin, glial cell differentiation regulator-like [Source:HGNC Symbol;Acc:HGNC:27584]	3.16613	6.41391e-09		ENSMUSG00000039208	Metrnl	meteorin, glial cell differentiation regulator-like [Source:MGI Symbol;Acc:MGI:2384806]	1.44993	0.0410117	1.17387	0.360618	1.48063	3.35262e-05
ENSG00000124762	CDKN1A	cyclin-dependent kinase inhibitor 1A (p21, Cip1) [Source:HGNC Symbol;Acc:HGNC:1784]	3.1627	0.000289632		ENSMUSG00000023067	Cdkn1a	cyclin-dependent kinase inhibitor 1A (P21) [Source:MGI Symbol;Acc:MGI:104556]	2.51135	5.01706e-20	4.17895	4.69191e-56	2.72604	2.07808e-97
ENSG00000129911	KLF16	Kruppel-like factor 16 [Source:HGNC Symbol;Acc:HGNC:16857]	3.15201	6.65334e-12		ENSMUSG00000035397	Klf16	Kruppel-like factor 16 [Source:MGI Symbol;Acc:MGI:2153049]	2.9858	1.12396e-21	3.45613	4.82636e-89	2.05169	6.58188e-17
ENSG00000164211	STARD4	StAR-related lipid transfer (START) domain containing 4 [Source:HGNC Symbol;Acc:HGNC:18058]	3.14876	8.24621e-22		ENSMUSG00000024378	Stard4	StAR-related lipid transfer (START) domain containing 4 [Source:MGI Symbol;Acc:MGI:2156764]	2.0549	8.60506e-05	3.26404	8.63006e-98	3.17317	5.45865e-97
ENSG00000120306	CYSTM1	cysteine-rich transmembrane module containing 1 [Source:HGNC Symbol;Acc:HGNC:30239]	3.14684	1.72222e-21		ENSMUSG00000046727	Cystm1	cysteine-rich transmembrane module containing 1 [Source:MGI Symbol;Acc:MGI:1913310]	4.64641	1.01223e-72	5.37232	7.87847e-133	3.58737	9.11715e-62
ENSG00000187678	SPRY4	sprouty RTK signaling antagonist 4 [Source:HGNC Symbol;Acc:HGNC:15533]	3.14609	6.88092e-35		ENSMUSG00000024427	Spry4	sprouty homolog 4 (Drosophila) [Source:MGI Symbol;Acc:MGI:1345144]	2.31768	8.8107e-16	2.86549	1.92365e-41	2.84334	2.68919e-43
ENSG00000104549	SQLE	squalene epoxidase [Source:HGNC Symbol;Acc:HGNC:11279]	3.14327	2.38822e-24		ENSMUSG00000022351	Sqle	squalene epoxidase [Source:MGI Symbol;Acc:MGI:109296]	1.38306	0.000143794	1.64199	1.81354e-26	1.80864	2.19933e-32
ENSG00000004866	ST7	suppression of tumorigenicity 7 [Source:HGNC Symbol;Acc:HGNC:11351]	3.12948	2.53233e-12		ENSMUSG00000029534	St7	suppression of tumorigenicity 7 [Source:MGI Symbol;Acc:MGI:1927450]	3.96225	1.03431e-32	2.45745	1.71197e-56	2.21388	2.35757e-29
ENSG00000128272	ATF4	activating transcription factor 4 [Source:HGNC Symbol;Acc:HGNC:786]	3.12357	2.17327e-10		ENSMUSG00000042406	Atf4	activating transcription factor 4 [Source:MGI Symbol;Acc:MGI:88096]	4.43163	1.26911e-40	6.93337	9.14377e-254	4.59243	1.26436e-38
ENSG00000116604	MEF2D	myocyte enhancer factor 2D [Source:HGNC Symbol;Acc:HGNC:6997]	3.12316	1.69828e-15		ENSMUSG00000001419	Mef2d	myocyte enhancer factor 2D [Source:MGI Symbol;Acc:MGI:99533]	1.7195	4.6638e-09	2.58294	2.62805e-45	2.56321	5.08239e-70
ENSG00000196821	C6orf106	chromosome 6 open reading frame 106 [Source:HGNC Symbol;Acc:HGNC:21215]	3.11513	2.31094e-20		ENSMUSG00000056692	D17Wsu92e	DNA segment, Chr 17, Wayne State University 92, expressed [Source:MGI Symbol;Acc:MGI:106281]	2.02269	7.44804e-18	1.5272	3.33533e-17	1.95845	9.06598e-37
ENSG00000105835	NAMPT	nicotinamide phosphoribosyltransferase [Source:HGNC Symbol;Acc:HGNC:30092]	3.11308	6.4621e-12		ENSMUSG00000020572	Nampt	nicotinamide phosphoribosyltransferase [Source:MGI Symbol;Acc:MGI:1929865]	2.44071	2.28644e-27	2.82672	4.38843e-95	1.47406	1.80655e-14
ENSG00000155090	KLF10	Kruppel-like factor 10 [Source:HGNC Symbol;Acc:HGNC:11810]	3.10931	6.5867e-09		ENSMUSG00000037465	Klf10	Kruppel-like factor 10 [Source:MGI Symbol;Acc:MGI:1101353]	0.923704	0.643013	1.33312	0.45952	1.10815	0.245513
ENSG00000139438	FAM222A	family with sequence similarity 222, member A [Source:HGNC Symbol;Acc:HGNC:25915]	3.10489	1.58207e-12		ENSMUSG00000041930	Fam222a	family with sequence similarity 222, member A [Source:MGI Symbol;Acc:MGI:3605543]	1.01099	0.986578	1.46374	0.0174914	1.624	2.11071e-05
ENSG00000185950	IRS2	insulin receptor substrate 2 [Source:HGNC Symbol;Acc:HGNC:6126]	3.05677	0.000124146		ENSMUSG00000038894	Irs2	insulin receptor substrate 2 [Source:MGI Symbol;Acc:MGI:109334]	5.16584	1.34169e-99	5.36654	5.28403e-126	3.28206	9.89786e-58
ENSG00000156471	PTDSS1	phosphatidylserine synthase 1 [Source:HGNC Symbol;Acc:HGNC:9587]	3.04611	2.38286e-21		ENSMUSG00000021518	Ptdss1	phosphatidylserine synthase 1 [Source:MGI Symbol;Acc:MGI:1276575]	0.992985	0.961496	0.982303	0.871901	1.03207	0.626938
ENSG00000187605	TET3	tet methylcytosine dioxygenase 3 [Source:HGNC Symbol;Acc:HGNC:28313]	3.03975	5.68999e-09		ENSMUSG00000034832	Tet3	tet methylcytosine dioxygenase 3 [Source:MGI Symbol;Acc:MGI:2446229]	2.97532	5.34559e-11	2.27586	4.13362e-56	3.0156	1.40466e-14
ENSG00000099377	HSD3B7	hydroxy-delta-5-steroid dehydrogenase, 3 beta- and steroid delta-isomerase 7 [Source:HGNC Symbol;Acc:HGNC:18324]	3.03933	0.0005026		ENSMUSG00000042289	Hsd3b7	hydroxy-delta-5-steroid dehydrogenase, 3 beta- and steroid delta-isomerase 7 [Source:MGI Symbol;Acc:MGI:2141879]	1.55562	0.00247269	1.75217	2.29927e-05	1.20103	0.0921057
ENSG00000163659	TIPARP	TCDD-inducible poly(ADP-ribose) polymerase [Source:HGNC Symbol;Acc:HGNC:23696]	3.03797	9.71263e-11		ENSMUSG00000034640	Tiparp	TCDD-inducible poly(ADP-ribose) polymerase [Source:MGI Symbol;Acc:MGI:2159210]	15.8177	1.96142e-97	8.99325	2.39772e-244	3.15869	5.99984e-85
ENSG00000154319	FAM167A	family with sequence similarity 167, member A [Source:HGNC Symbol;Acc:HGNC:15549]	3.01415	1.9937e-19		ENSMUSG00000035095	Fam167a	family with sequence similarity 167, member A [Source:MGI Symbol;Acc:MGI:3606565]	2.47799	9.91424e-25	1.67307	1.54299e-16	3.34105	5.76032e-61
ENSG00000150961	SEC24D	SEC24 family member D [Source:HGNC Symbol;Acc:HGNC:10706]	3.01269	5.38163e-15		ENSMUSG00000039234	Sec24d	Sec24 related gene family, member D (S. cerevisiae) [Source:MGI Symbol;Acc:MGI:1916858]	1.69938	1.03836e-09	1.09756	0.257576	1.49405	4.06051e-17
ENSG00000139890	REM2	RAS (RAD and GEM)-like GTP binding 2 [Source:HGNC Symbol;Acc:HGNC:20248]	3.00089	1.15394e-18		ENSMUSG00000022176	Rem2	rad and gem related GTP binding protein 2 [Source:MGI Symbol;Acc:MGI:2155260]	5.6514	1.29308e-41	9.98138	1.75894e-38	3.39509	3.3258e-65
ENSG00000171488	LRRC8C	leucine rich repeat containing 8 family, member C [Source:HGNC Symbol;Acc:HGNC:25075]	3.00058	1.10253e-10		ENSMUSG00000054720	Lrrc8c	leucine rich repeat containing 8 family, member C [Source:MGI Symbol;Acc:MGI:2140839]	1.11389	0.610459	1.03031	0.830908	1.18513	0.00620209
ENSG00000196843	ARID5A	AT rich interactive domain 5A (MRF1-like) [Source:HGNC Symbol;Acc:HGNC:17361]	2.98822	9.15409e-16		ENSMUSG00000037447	Arid5a	AT rich interactive domain 5A (MRF1-like) [Source:MGI Symbol;Acc:MGI:2443039]	7.25362	2.01125e-32	11.0867	2.95507e-196	2.26728	6.08795e-17
ENSG00000131979	GCH1	GTP cyclohydrolase 1 [Source:HGNC Symbol;Acc:HGNC:4193]	2.97358	1.4795e-14		ENSMUSG00000037580	Gch1	GTP cyclohydrolase 1 [Source:MGI Symbol;Acc:MGI:95675]	5.29636	2.71349e-17	7.26047	1.70059e-20	4.7479	2.38155e-10
ENSG00000137193	PIM1	Pim-1 proto-oncogene, serine/threonine kinase [Source:HGNC Symbol;Acc:HGNC:8986]	2.97318	1.01338e-08		ENSMUSG00000024014	Pim1	proviral integration site 1 [Source:MGI Symbol;Acc:MGI:97584]	19.2196	3.34329e-62	8.86538	4.66263e-215	7.14119	5.83833e-81
ENSG00000152413	HOMER1	homer scaffolding protein 1 [Source:HGNC Symbol;Acc:HGNC:17512]	2.96937	9.85682e-09		ENSMUSG00000007617	Homer1	homer homolog 1 (Drosophila) [Source:MGI Symbol;Acc:MGI:1347345]	10.4876	5.41512e-71	16.3341	0	9.42629	1.03399e-66
ENSG00000089902	RCOR1	REST corepressor 1 [Source:HGNC Symbol;Acc:HGNC:17441]	2.95805	0.00011789		ENSMUSG00000037896	Rcor1	REST corepressor 1 [Source:MGI Symbol;Acc:MGI:106340]	1.99527	3.04474e-11	1.40762	4.72064e-09	1.35881	3.7144e-07
ENSG00000131196	NFATC1	nuclear factor of activated T-cells, cytoplasmic, calcineurin-dependent 1 [Source:HGNC Symbol;Acc:HGNC:7775]	2.95484	3.29689e-09		ENSMUSG00000033016	Nfatc1	nuclear factor of activated T cells, cytoplasmic, calcineurin dependent 1 [Source:MGI Symbol;Acc:MGI:102469]	2.841	4.94444e-12	1.40247	0.0342196	1.3426	0.00151767
ENSG00000020577	SAMD4A	sterile alpha motif domain containing 4A [Source:HGNC Symbol;Acc:HGNC:23023]	2.92287	0.00312391		ENSMUSG00000021838	Samd4	sterile alpha motif domain containing 4 [Source:MGI Symbol;Acc:MGI:1921730]	1.71987	2.86179e-06	2.30265	3.78496e-39	1.98864	1.60058e-26
ENSG00000169032	MAP2K1	mitogen-activated protein kinase kinase 1 [Source:HGNC Symbol;Acc:HGNC:6840]	2.91026	7.56223e-11		ENSMUSG00000004936	Map2k1	mitogen-activated protein kinase kinase 1 [Source:MGI Symbol;Acc:MGI:1346866]	1.05032	0.662656	0.998633	0.984462	1.28394	1.99229e-07
ENSG00000196182	STK40	serine/threonine kinase 40 [Source:HGNC Symbol;Acc:HGNC:21373]	2.90941	4.91577e-14		ENSMUSG00000042608	Stk40	serine/threonine kinase 40 [Source:MGI Symbol;Acc:MGI:1921428]	4.86388	4.04299e-39	4.99507	2.28703e-116	3.16249	5.50833e-103
ENSG00000113811	SELK	selenoprotein K [Source:EntrezGene;Acc:58515]	2.90139	5.51089e-24		ENSMUSG00000042682	Selk	selenoprotein K [Source:MGI Symbol;Acc:MGI:1931466]	1.96084	6.99386e-28	2.41667	2.58818e-50	2.30008	1.37469e-64
ENSG00000112245	PTP4A1	protein tyrosine phosphatase type IVA, member 1 [Source:HGNC Symbol;Acc:HGNC:9634]	2.89518	3.51803e-11		ENSMUSG00000026064	Ptp4a1	protein tyrosine phosphatase 4a1 [Source:MGI Symbol;Acc:MGI:1277096]	4.02341	5.95586e-60	3.619	6.31526e-130	2.73025	3.99451e-92
ENSG00000244405	ETV5	ets variant 5 [Source:HGNC Symbol;Acc:HGNC:3494]	2.89319	1.11588e-20		ENSMUSG00000013089	Etv5	ets variant 5 [Source:MGI Symbol;Acc:MGI:1096867]	0.956669	0.750801	1.38796	1.03915e-07	2.06682	4.99851e-27
ENSG00000081189	MEF2C	myocyte enhancer factor 2C [Source:HGNC Symbol;Acc:HGNC:6996]	2.88961	2.15919e-34		ENSMUSG00000005583	Mef2c	myocyte enhancer factor 2C [Source:MGI Symbol;Acc:MGI:99458]	1.22157	0.00516039	1.13314	0.0330289	1.95146	4.10663e-19
ENSG00000061656	SPAG4	sperm associated antigen 4 [Source:HGNC Symbol;Acc:HGNC:11214]	2.88168	3.88742e-17		ENSMUSG00000038180	Spag4	sperm associated antigen 4 [Source:MGI Symbol;Acc:MGI:2444120]	2.85062	1.07978e-26	3.22429	1.78544e-40	2.53089	6.14003e-12
ENSG00000151466	SCLT1	sodium channel and clathrin linker 1 [Source:HGNC Symbol;Acc:HGNC:26406]	2.84044	5.31757e-17		ENSMUSG00000059834	Sclt1	sodium channel and clathrin linker 1 [Source:MGI Symbol;Acc:MGI:1914411]	3.01435	1.6213e-22	2.9289	4.02449e-56	2.35604	1.804e-20
ENSG00000105711	SCN1B	sodium channel, voltage gated, type I beta subunit [Source:HGNC Symbol;Acc:HGNC:10586]	2.84032	6.88869e-07		ENSMUSG00000019194	Scn1b	sodium channel, voltage-gated, type I, beta [Source:MGI Symbol;Acc:MGI:98247]	1.35694	0.00623712	1.52959	2.48084e-06	2.34921	3.23276e-29
ENSG00000095397	DFNB31	deafness, autosomal recessive 31 [Source:HGNC Symbol;Acc:HGNC:16361]	2.81519	2.33267e-29		ENSMUSG00000039137	Whrn	whirlin [Source:MGI Symbol;Acc:MGI:2682003]	1.42942	0.000289309	1.47434	4.02657e-05	1.64642	1.79789e-09
ENSG00000060138	YBX3	Y box binding protein 3 [Source:HGNC Symbol;Acc:HGNC:2428]	2.81436	6.13522e-07		ENSMUSG00000030189	Ybx3	Y box protein 3 [Source:MGI Symbol;Acc:MGI:2137670]	0.702423	0.00377032	0.904149	0.12306	1.24547	3.77813e-05
ENSG00000013619	MAMLD1	mastermind-like domain containing 1 [Source:HGNC Symbol;Acc:HGNC:2568]	2.81314	3.4148e-17		ENSMUSG00000059401	Mamld1	mastermind-like domain containing 1 [Source:MGI Symbol;Acc:MGI:3045303]	2.37312	8.3145e-16	2.82714	1.31522e-31	1.8024	3.67749e-16
ENSG00000099875	MKNK2	MAP kinase interacting serine/threonine kinase 2 [Source:HGNC Symbol;Acc:HGNC:7111]	2.81162	1.30338e-10		ENSMUSG00000020190	Mknk2	MAP kinase-interacting serine/threonine kinase 2 [Source:MGI Symbol;Acc:MGI:894279]	3.89112	1.89678e-38	3.28006	1.32818e-109	2.40644	6.21882e-47
ENSG00000105974	CAV1	caveolin 1, caveolae protein, 22kDa [Source:HGNC Symbol;Acc:HGNC:1527]	2.79752	1.64462e-06		ENSMUSG00000007655	Cav1	caveolin 1, caveolae protein [Source:MGI Symbol;Acc:MGI:102709]	2.53037	2.21264e-05	1.06156	0.873188	1.86497	2.44994e-25
ENSG00000181788	SIAH2	siah E3 ubiquitin protein ligase 2 [Source:HGNC Symbol;Acc:HGNC:10858]	2.79476	5.18774e-11		ENSMUSG00000036432	Siah2	seven in absentia 2 [Source:MGI Symbol;Acc:MGI:108062]	5.49485	1.16984e-66	5.00588	3.5426e-125	3.53182	5.81962e-71
ENSG00000166016	ABTB2	ankyrin repeat and BTB (POZ) domain containing 2 [Source:HGNC Symbol;Acc:HGNC:23842]	2.78317	0.000580292		ENSMUSG00000032724	Abtb2	ankyrin repeat and BTB (POZ) domain containing 2 [Source:MGI Symbol;Acc:MGI:2139365]	1.28992	0.101783	1.30047	6.82911e-05	2.35296	5.14804e-22
ENSG00000006652	IFRD1	interferon-related developmental regulator 1 [Source:HGNC Symbol;Acc:HGNC:5456]	2.78182	1.5831e-12		ENSMUSG00000001627	Ifrd1	interferon-related developmental regulator 1 [Source:MGI Symbol;Acc:MGI:1316717]	6.10965	1.54583e-81	8.15492	0	5.94062	6.71073e-244
ENSG00000109089	CDR2L	cerebellar degeneration-related protein 2-like [Source:HGNC Symbol;Acc:HGNC:29999]	2.77861	3.28462e-19		ENSMUSG00000050910	Cdr2l	cerebellar degeneration-related protein 2-like [Source:MGI Symbol;Acc:MGI:2684867]	0.577638	2.81678e-15	0.5915	1.53354e-17	0.880261	0.0569439
ENSG00000115641	FHL2	four and a half LIM domains 2 [Source:HGNC Symbol;Acc:HGNC:3703]	2.7697	7.80442e-13		ENSMUSG00000008136	Fhl2	four and a half LIM domains 2 [Source:MGI Symbol;Acc:MGI:1338762]	1.12457	0.352267	0.88751	0.306125	1.70936	5.55769e-13
ENSG00000178764	ZHX2	zinc fingers and homeoboxes 2 [Source:HGNC Symbol;Acc:HGNC:18513]	2.76327	5.48828e-08		ENSMUSG00000071757	Zhx2	zinc fingers and homeoboxes 2 [Source:MGI Symbol;Acc:MGI:2683087]	4.54626	3.41235e-24	2.95258	2.6714e-61	2.23947	1.26731e-33
ENSG00000052802	MSMO1	methylsterol monooxygenase 1 [Source:HGNC Symbol;Acc:HGNC:10545]	2.76142	5.80223e-25		ENSMUSG00000031604	Msmo1	methylsterol monoxygenase 1 [Source:MGI Symbol;Acc:MGI:1913484]	2.23637	6.01184e-17	2.41699	2.28856e-57	2.40856	1.47507e-49
ENSG00000141664	ZCCHC2	zinc finger, CCHC domain containing 2 [Source:HGNC Symbol;Acc:HGNC:22916]	2.76099	1.01866e-09		ENSMUSG00000038866	Zcchc2	zinc finger, CCHC domain containing 2 [Source:MGI Symbol;Acc:MGI:2444114]	2.15206	2.88149e-11	2.57737	9.74076e-55	1.51711	2.2586e-10
ENSG00000139514	SLC7A1	solute carrier family 7 (cationic amino acid transporter, y+ system), member 1 [Source:HGNC Symbol;Acc:HGNC:11057]	2.75586	1.37512e-11		ENSMUSG00000041313	Slc7a1	solute carrier family 7 (cationic amino acid transporter, y+ system), member 1 [Source:MGI Symbol;Acc:MGI:88117]	1.83338	1.8508e-06	4.22085	2.33761e-171	3.64307	2.81589e-109
ENSG00000139354	GAS2L3	growth arrest-specific 2 like 3 [Source:HGNC Symbol;Acc:HGNC:27475]	2.74468	6.14476e-10		ENSMUSG00000074802	Gas2l3	growth arrest-specific 2 like 3 [Source:MGI Symbol;Acc:MGI:1918780]	0.910392	0.627617	1.63106	3.75439e-09	1.68666	0.000135924
ENSG00000160584	SIK3	SIK family kinase 3 [Source:HGNC Symbol;Acc:HGNC:29165]	2.73893	6.92729e-15		ENSMUSG00000034135	Sik3	SIK family kinase 3 [Source:MGI Symbol;Acc:MGI:2446296]	2.52714	8.54192e-27	4.7183	3.05516e-147	2.53917	6.9096e-69
ENSG00000151025	GPR158	G protein-coupled receptor 158 [Source:HGNC Symbol;Acc:HGNC:23689]	2.73381	1.0425e-06		ENSMUSG00000045967	Gpr158	G protein-coupled receptor 158 [Source:MGI Symbol;Acc:MGI:2441697]	0.703372	0.00179693	0.917517	0.509362	1.03052	0.775865
ENSG00000051108	HERPUD1	homocysteine-inducible, endoplasmic reticulum stress-inducible, ubiquitin-like domain member 1 [Source:HGNC Symbol;Acc:HGNC:13744]	2.7224	1.69439e-09		ENSMUSG00000031770	Herpud1	homocysteine-inducible, endoplasmic reticulum stress-inducible, ubiquitin-like domain member 1 [Source:MGI Symbol;Acc:MGI:1927406]	2.9831	7.22933e-18	6.71673	1.68041e-174	2.74612	1.36495e-52
ENSG00000240849	TMEM189	transmembrane protein 189 [Source:HGNC Symbol;Acc:HGNC:16735]	2.71944	3.04672e-13		ENSMUSG00000090213	Tmem189	transmembrane protein 189 [Source:MGI Symbol;Acc:MGI:2142624]	0.863703	0.145451	0.878303	0.136345	1.27824	0.000231996
ENSG00000095794	CREM	cAMP responsive element modulator [Source:HGNC Symbol;Acc:HGNC:2352]	2.71198	4.80762e-14		ENSMUSG00000063889	Crem	cAMP responsive element modulator [Source:MGI Symbol;Acc:MGI:88495]	17.7492	8.60244e-290	14.8377	0	3.94545	3.11618e-51
ENSG00000162889	MAPKAPK2	mitogen-activated protein kinase-activated protein kinase 2 [Source:HGNC Symbol;Acc:HGNC:6887]	2.70762	6.13439e-21		ENSMUSG00000016528	Mapkapk2	MAP kinase-activated protein kinase 2 [Source:MGI Symbol;Acc:MGI:109298]	2.09474	1.91099e-17	1.3133	1.02379e-06	1.67009	1.73371e-22
ENSG00000123395	ATG101	autophagy related 101 [Source:HGNC Symbol;Acc:HGNC:25679]	2.70404	8.5055e-10		ENSMUSG00000037204	Atg101	autophagy related 101 [Source:MGI Symbol;Acc:MGI:1915368]	1.44206	0.000216568	1.20231	0.0143083	1.4168	5.17572e-06
ENSG00000118515	SGK1	serum/glucocorticoid regulated kinase 1 [Source:HGNC Symbol;Acc:HGNC:10810]	2.70155	3.04785e-12		ENSMUSG00000019970	Sgk1	serum/glucocorticoid regulated kinase 1 [Source:MGI Symbol;Acc:MGI:1340062]	2.86559	2.532e-63	1.72858	0.0356414	2.05856	1.43426e-23
ENSG00000109762	SNX25	sorting nexin 25 [Source:HGNC Symbol;Acc:HGNC:21883]	2.69808	2.98558e-35		ENSMUSG00000038291	Snx25	sorting nexin 25 [Source:MGI Symbol;Acc:MGI:2142610]	0.876237	0.231924	0.856565	0.0162779	1.02908	0.748984
ENSG00000104722	NEFM	neurofilament, medium polypeptide [Source:HGNC Symbol;Acc:HGNC:7734]	2.69354	3.47719e-26		ENSMUSG00000022054	Nefm	neurofilament, medium polypeptide [Source:MGI Symbol;Acc:MGI:97314]	1.56026	1.91736e-06	1.57588	0.0536457	1.4856	1.05764e-20
ENSG00000183864	TOB2	transducer of ERBB2, 2 [Source:HGNC Symbol;Acc:HGNC:11980]	2.6861	2.17263e-11		ENSMUSG00000048546	Tob2	transducer of ERBB2, 2 [Source:MGI Symbol;Acc:MGI:1888525]	3.33384	1.53524e-29	3.19906	4.79444e-47	2.38442	4.53282e-49
ENSG00000182481	KPNA2	karyopherin alpha 2 (RAG cohort 1, importin alpha 1) [Source:HGNC Symbol;Acc:HGNC:6395]	2.6855	1.16719e-08		ENSMUSG00000018362	Kpna2	karyopherin (importin) alpha 2 [Source:MGI Symbol;Acc:MGI:103561]	1.63075	0.000143255	1.24795	0.000176745	1.13946	0.0613021
ENSG00000081377	CDC14B	cell division cycle 14B [Source:HGNC Symbol;Acc:HGNC:1719]	2.67601	1.57242e-14		ENSMUSG00000033102	Cdc14b	CDC14 cell division cycle 14B [Source:MGI Symbol;Acc:MGI:2441808]	3.48621	2.40558e-20	1.76955	1.87494e-06	1.52799	6.39208e-06
ENSG00000148339	SLC25A25	solute carrier family 25 (mitochondrial carrier; phosphate carrier), member 25 [Source:HGNC Symbol;Acc:HGNC:20663]	2.66334	9.22087e-18		ENSMUSG00000026819	Slc25a25	solute carrier family 25 (mitochondrial carrier, phosphate carrier), member 25 [Source:MGI Symbol;Acc:MGI:1915913]	2.13413	4.39324e-18	1.87253	1.94405e-29	0.932977	0.36703
ENSG00000204060	FOXO6	forkhead box O6 [Source:HGNC Symbol;Acc:HGNC:24814]	2.66213	6.44268e-07		ENSMUSG00000052135	Foxo6	forkhead box O6 [Source:MGI Symbol;Acc:MGI:2676586]	0.581152	9.4478e-05	0.577712	2.60067e-10	0.929156	0.6865
ENSG00000136158	SPRY2	sprouty RTK signaling antagonist 2 [Source:HGNC Symbol;Acc:HGNC:11270]	2.65884	2.11151e-19		ENSMUSG00000022114	Spry2	sprouty homolog 2 (Drosophila) [Source:MGI Symbol;Acc:MGI:1345138]	2.87754	4.36392e-14	4.10467	4.53875e-150	2.3765	1.31032e-38
ENSG00000034152	MAP2K3	mitogen-activated protein kinase kinase 3 [Source:HGNC Symbol;Acc:HGNC:6843]	2.65397	5.81895e-08		ENSMUSG00000018932	Map2k3	mitogen-activated protein kinase kinase 3 [Source:MGI Symbol;Acc:MGI:1346868]	0.916559	0.43163	0.862051	0.203119	1.35245	3.68464e-05
ENSG00000178053	MLF1	myeloid leukemia factor 1 [Source:HGNC Symbol;Acc:HGNC:7125]	2.65212	4.20953e-14		ENSMUSG00000048416	Mlf1	myeloid leukemia factor 1 [Source:MGI Symbol;Acc:MGI:1341819]	6.23055	7.07914e-09	3.35777	1.17142e-20	3.36563	9.06133e-22
ENSG00000113161	HMGCR	3-hydroxy-3-methylglutaryl-CoA reductase [Source:HGNC Symbol;Acc:HGNC:5006]	2.64291	1.00286e-18		ENSMUSG00000021670	Hmgcr	3-hydroxy-3-methylglutaryl-Coenzyme A reductase [Source:MGI Symbol;Acc:MGI:96159]	1.76117	1.3229e-20	2.77661	4.93697e-79	1.91851	8.35014e-41
ENSG00000101493	ZNF516	zinc finger protein 516 [Source:HGNC Symbol;Acc:HGNC:28990]	2.63884	1.56797e-07		ENSMUSG00000058881	Zfp516	zinc finger protein 516 [Source:MGI Symbol;Acc:MGI:2443957]	4.64679	5.65645e-39	3.00381	6.31665e-85	1.91615	1.92409e-31
ENSG00000245532	NEAT1	nuclear paraspeckle assembly transcript 1 (non-protein coding) [Source:HGNC Symbol;Acc:HGNC:30815]	2.63414	2.57017e-27		ENSMUSG00000092274	Neat1	nuclear paraspeckle assembly transcript 1 (non-protein coding) [Source:MGI Symbol;Acc:MGI:1914211]	1.18168	0.998631	3.64062	7.4497e-104	0.465736	1.70448e-30
ENSG00000196352	CD55	CD55 molecule, decay accelerating factor for complement (Cromer blood group) [Source:HGNC Symbol;Acc:HGNC:2665]	2.6271	5.6996e-09		ENSMUSG00000026399	Cd55	CD55 molecule, decay accelerating factor for complement [Source:MGI Symbol;Acc:MGI:104850]	1.07331	0.767934	1.05319	0.885435	0.978386	0.826651
ENSG00000133874	RNF122	ring finger protein 122 [Source:HGNC Symbol;Acc:HGNC:21147]	2.62341	1.92702e-15		ENSMUSG00000039328	Rnf122	ring finger protein 122 [Source:MGI Symbol;Acc:MGI:1916117]	1.94389	8.54322e-07	1.10441	0.414705	1.97462	8.78385e-18
ENSG00000125753	VASP	vasodilator-stimulated phosphoprotein [Source:HGNC Symbol;Acc:HGNC:12652]	2.62307	4.06207e-11		ENSMUSG00000030403	Vasp	vasodilator-stimulated phosphoprotein [Source:MGI Symbol;Acc:MGI:109268]	4.08974	1.75173e-66	1.82727	6.46428e-22	2.05887	3.38598e-30
ENSG00000006831	ADIPOR2	adiponectin receptor 2 [Source:HGNC Symbol;Acc:HGNC:24041]	2.61029	5.09579e-12		ENSMUSG00000030168	Adipor2	adiponectin receptor 2 [Source:MGI Symbol;Acc:MGI:93830]	1.51062	3.7535e-08	1.7447	3.2379e-24	1.91066	3.1705e-40
ENSG00000131459	GFPT2	glutamine-fructose-6-phosphate transaminase 2 [Source:HGNC Symbol;Acc:HGNC:4242]	2.59863	3.85327e-10		ENSMUSG00000020363	Gfpt2	glutamine fructose-6-phosphate transaminase 2 [Source:MGI Symbol;Acc:MGI:1338883]	0.895689	0.450493	0.666166	0.000296329	0.978529	0.887336
ENSG00000154640	BTG3	BTG family, member 3 [Source:HGNC Symbol;Acc:HGNC:1132]	2.59769	4.42599e-13		ENSMUSG00000022863	Btg3	B cell translocation gene 3 [Source:MGI Symbol;Acc:MGI:109532]	7.34175	7.16977e-30	4.60567	3.34775e-41	2.46025	1.62587e-11
ENSG00000166603	MC4R	melanocortin 4 receptor [Source:HGNC Symbol;Acc:HGNC:6932]	2.59521	8.86816e-09		ENSMUSG00000047259	Mc4r	melanocortin 4 receptor [Source:MGI Symbol;Acc:MGI:99457]	2.45886	2.01469e-08	1.32453	0.221087	0.732738	0.360029
ENSG00000104313	EYA1	EYA transcriptional coactivator and phosphatase 1 [Source:HGNC Symbol;Acc:HGNC:3519]	2.59117	2.87974e-25		ENSMUSG00000025932	Eya1	eyes absent 1 homolog (Drosophila) [Source:MGI Symbol;Acc:MGI:109344]	1.43837	0.127648	1.2108	0.106808	1.34543	0.00203833
ENSG00000187608	ISG15	ISG15 ubiquitin-like modifier [Source:HGNC Symbol;Acc:HGNC:4053]	2.57422	1.02239e-06		ENSMUSG00000035692	Isg15	ISG15 ubiquitin-like modifier [Source:MGI Symbol;Acc:MGI:1855694]	2.1533	0.01066	1.99901	0.0779112	0.83828	0.522376
ENSG00000221869	CEBPD	CCAAT/enhancer binding protein (C/EBP), delta [Source:HGNC Symbol;Acc:HGNC:1835]	2.5724	0.000905429		ENSMUSG00000071637	Cebpd	CCAAT/enhancer binding protein (C/EBP), delta [Source:MGI Symbol;Acc:MGI:103573]	1.66891	0.128227	1.72142	0.0422116	1.31333	0.140432
ENSG00000111859	NEDD9	neural precursor cell expressed, developmentally down-regulated 9 [Source:HGNC Symbol;Acc:HGNC:7733]	2.57235	1.58747e-08		ENSMUSG00000021365	Nedd9	neural precursor cell expressed, developmentally down-regulated gene 9 [Source:MGI Symbol;Acc:MGI:97302]	6.56465	2.3522e-89	3.72069	1.66593e-83	1.90039	2.40115e-32
ENSG00000135241	PNPLA8	patatin-like phospholipase domain containing 8 [Source:HGNC Symbol;Acc:HGNC:28900]	2.57122	3.42774e-09		ENSMUSG00000036257	Pnpla8	patatin-like phospholipase domain containing 8 [Source:MGI Symbol;Acc:MGI:1914702]	1.22677	0.000941194	1.12007	0.043045	1.3041	1.02347e-08
ENSG00000120437	ACAT2	acetyl-CoA acetyltransferase 2 [Source:HGNC Symbol;Acc:HGNC:94]	2.57018	2.21209e-53		ENSMUSG00000023832	Acat2	acetyl-Coenzyme A acetyltransferase 2 [Source:MGI Symbol;Acc:MGI:87871]	0.869677	0.385805	0.975031	0.799783	1.20218	0.000110718
ENSG00000162769	FLVCR1	feline leukemia virus subgroup C cellular receptor 1 [Source:HGNC Symbol;Acc:HGNC:24682]	2.56785	1.67946e-10		ENSMUSG00000066595	Mfsd7b	major facilitator superfamily domain containing 7B [Source:MGI Symbol;Acc:MGI:2444881]	1.45808	0.00264928	1.53921	6.51865e-09	1.48278	1.09483e-07
ENSG00000172071	EIF2AK3	eukaryotic translation initiation factor 2-alpha kinase 3 [Source:HGNC Symbol;Acc:HGNC:3255]	2.56044	6.67038e-09		ENSMUSG00000031668	Eif2ak3	eukaryotic translation initiation factor 2 alpha kinase 3 [Source:MGI Symbol;Acc:MGI:1341830]	4.58433	3.59258e-93	5.48304	5.51685e-152	2.11243	2.7397e-26
ENSG00000130222	GADD45G	growth arrest and DNA-damage-inducible, gamma [Source:HGNC Symbol;Acc:HGNC:4097]	2.55949	0.00572326		ENSMUSG00000021453	Gadd45g	growth arrest and DNA-damage-inducible 45 gamma [Source:MGI Symbol;Acc:MGI:1346325]	32.5999	2.87943e-27	12.1376	1.57941e-30	3.63506	3.76906e-07
ENSG00000010818	HIVEP2	human immunodeficiency virus type I enhancer binding protein 2 [Source:HGNC Symbol;Acc:HGNC:4921]	2.55461	1.05698e-09		ENSMUSG00000015501	Hivep2	human immunodeficiency virus type I enhancer binding protein 2 [Source:MGI Symbol;Acc:MGI:1338076]	1.65365	1.06802e-09	2.43321	6.09829e-83	2.07337	8.11623e-07
ENSG00000164897	TMUB1	transmembrane and ubiquitin-like domain containing 1 [Source:HGNC Symbol;Acc:HGNC:21709]	2.55005	3.12285e-15		ENSMUSG00000028958	Tmub1	transmembrane and ubiquitin-like domain containing 1 [Source:MGI Symbol;Acc:MGI:1923764]	1.35985	0.0208776	0.861639	0.130489	0.885146	0.222135
ENSG00000070961	ATP2B1	ATPase, Ca++ transporting, plasma membrane 1 [Source:HGNC Symbol;Acc:HGNC:814]	2.54808	1.26116e-20		ENSMUSG00000019943	Atp2b1	ATPase, Ca++ transporting, plasma membrane 1 [Source:MGI Symbol;Acc:MGI:104653]	1.00479	0.989072	1.65718	7.26723e-28	1.41307	3.3036e-12
ENSG00000135048	TMEM2	transmembrane protein 2 [Source:HGNC Symbol;Acc:HGNC:11869]	2.53953	6.1311e-08		ENSMUSG00000024754	Tmem2	transmembrane protein 2 [Source:MGI Symbol;Acc:MGI:1890373]	1.04312	0.890466	0.927918	0.359714	1.83705	1.72459e-29
ENSG00000183955	SETD8	SET domain containing (lysine methyltransferase) 8 [Source:HGNC Symbol;Acc:HGNC:29489]	2.53887	9.04868e-18		ENSMUSG00000049327	Setd8	SET domain containing (lysine methyltransferase) 8 [Source:MGI Symbol;Acc:MGI:1915206]	0.860218	0.312933	1.02897	0.806345	1.35089	4.26954e-07
ENSG00000185924	RTN4RL1	reticulon 4 receptor-like 1 [Source:HGNC Symbol;Acc:HGNC:21329]	2.53812	1.17504e-15		ENSMUSG00000045287	Rtn4rl1	reticulon 4 receptor-like 1 [Source:MGI Symbol;Acc:MGI:2661375]	0.466999	7.94384e-09	0.584303	1.10671e-07	0.898717	0.401973
ENSG00000188760	TMEM198	transmembrane protein 198 [Source:HGNC Symbol;Acc:HGNC:33704]	2.53236	1.0049e-27		ENSMUSG00000051703	Tmem198	transmembrane protein 198 [Source:MGI Symbol;Acc:MGI:2443133]	2.43045	5.20639e-15	2.01606	1.98007e-28	3.64336	1.80395e-78
ENSG00000168610	STAT3	signal transducer and activator of transcription 3 (acute-phase response factor) [Source:HGNC Symbol;Acc:HGNC:11364]	2.52523	8.12664e-10		ENSMUSG00000004040	Stat3	signal transducer and activator of transcription 3 [Source:MGI Symbol;Acc:MGI:103038]	1.93292	3.19725e-13	2.01049	1.80157e-36	1.93978	1.96676e-58
ENSG00000180628	PCGF5	polycomb group ring finger 5 [Source:HGNC Symbol;Acc:HGNC:28264]	2.52474	7.96351e-12		ENSMUSG00000024805	Pcgf5	polycomb group ring finger 5 [Source:MGI Symbol;Acc:MGI:1923505]	3.00674	7.60172e-13	1.63599	7.05301e-05	2.31603	2.02241e-10
ENSG00000080854	IGSF9B	immunoglobulin superfamily, member 9B [Source:HGNC Symbol;Acc:HGNC:32326]	2.5243	0.00393823		ENSMUSG00000034275	Igsf9b	immunoglobulin superfamily, member 9B [Source:MGI Symbol;Acc:MGI:2685354]	1.57215	0.00778344	1.3135	0.000105403	3.8266	1.04998e-14
ENSG00000100811	YY1	YY1 transcription factor [Source:HGNC Symbol;Acc:HGNC:12856]	2.51791	1.28259e-09		ENSMUSG00000021264	Yy1	YY1 transcription factor [Source:MGI Symbol;Acc:MGI:99150]	1.48102	5.50404e-06	1.69012	1.96913e-16	1.54027	1.87318e-15
ENSG00000210112	MT-TM	mitochondrially encoded tRNA methionine [Source:HGNC Symbol;Acc:HGNC:7492]	2.51733	0.191863		ENSMUSG00000064344	mt-Tm	mitochondrially encoded tRNA methionine [Source:MGI Symbol;Acc:MGI:102480]	0.779287	0.641184	0.71581	0.316548	0.986237	0.976309
ENSG00000169967	MAP3K2	mitogen-activated protein kinase kinase kinase 2 [Source:HGNC Symbol;Acc:HGNC:6854]	2.51674	1.55082e-06		ENSMUSG00000024383	Map3k2	mitogen-activated protein kinase kinase kinase 2 [Source:MGI Symbol;Acc:MGI:1346873]	3.73834	2.58529e-20	3.24264	4.82422e-94	1.96342	1.06098e-28
ENSG00000130202	PVRL2	poliovirus receptor-related 2 (herpesvirus entry mediator B) [Source:HGNC Symbol;Acc:HGNC:9707]	2.51199	2.98269e-16		ENSMUSG00000062300	Pvrl2	poliovirus receptor-related 2 [Source:MGI Symbol;Acc:MGI:97822]	2.15248	2.22144e-13	2.09237	8.11741e-36	1.52763	3.02805e-12
ENSG00000132326	PER2	period circadian clock 2 [Source:HGNC Symbol;Acc:HGNC:8846]	2.51096	0.00191324		ENSMUSG00000055866	Per2	period circadian clock 2 [Source:MGI Symbol;Acc:MGI:1195265]	4.09822	1.1494e-17	4.17579	4.59619e-80	2.35913	1.37744e-21
ENSG00000092068	SLC7A8	solute carrier family 7 (amino acid transporter light chain, L system), member 8 [Source:HGNC Symbol;Acc:HGNC:11066]	2.50877	9.60434e-09		ENSMUSG00000022180	Slc7a8	solute carrier family 7 (cationic amino acid transporter, y+ system), member 8 [Source:MGI Symbol;Acc:MGI:1355323]	1.71491	1.49384e-09	2.75098	3.91382e-26	1.82745	2.64997e-10
ENSG00000022567	SLC45A4	solute carrier family 45, member 4 [Source:HGNC Symbol;Acc:HGNC:29196]	2.50837	1.91425e-13		ENSMUSG00000079020	Slc45a4	solute carrier family 45, member 4 [Source:MGI Symbol;Acc:MGI:2146236]	0.887945	0.161595	0.702472	4.98613e-08	0.935341	0.28618
ENSG00000079459	FDFT1	farnesyl-diphosphate farnesyltransferase 1 [Source:HGNC Symbol;Acc:HGNC:3629]	2.50755	3.07613e-37		ENSMUSG00000021273	Fdft1	farnesyl diphosphate farnesyl transferase 1 [Source:MGI Symbol;Acc:MGI:102706]	0.998596	0.97492	0.890558	0.0356765	1.30316	1.86119e-08
ENSG00000171451	DSEL	dermatan sulfate epimerase-like [Source:HGNC Symbol;Acc:HGNC:18144]	2.50684	5.87203e-12		ENSMUSG00000038702	Dsel	dermatan sulfate epimerase-like [Source:MGI Symbol;Acc:MGI:2442948]	0.96702	0.837428	1.06221	0.457996	1.07216	0.358348
ENSG00000171612	SLC25A33	solute carrier family 25 (pyrimidine nucleotide carrier), member 33 [Source:HGNC Symbol;Acc:HGNC:29681]	2.50553	3.31304e-25		ENSMUSG00000028982	Slc25a33	solute carrier family 25, member 33 [Source:MGI Symbol;Acc:MGI:1917806]	0.730482	0.0333926	0.743854	0.0201026	0.974219	0.852883
ENSG00000173334	TRIB1	tribbles pseudokinase 1 [Source:HGNC Symbol;Acc:HGNC:16891]	2.49972	5.43569e-15		ENSMUSG00000032501	Trib1	tribbles homolog 1 (Drosophila) [Source:MGI Symbol;Acc:MGI:2443397]	6.52421	1.2256e-56	13.5071	1.06555e-41	3.25197	2.2699e-49
ENSG00000198517	MAFK	v-maf avian musculoaponeurotic fibrosarcoma oncogene homolog K [Source:HGNC Symbol;Acc:HGNC:6782]	2.49892	5.85496e-39		ENSMUSG00000018143	Mafk	v-maf musculoaponeurotic fibrosarcoma oncogene family, protein K (avian) [Source:MGI Symbol;Acc:MGI:99951]	6.44617	2.07252e-67	2.08421	6.40572e-28	3.44807	7.00217e-49
ENSG00000180875	GREM2	gremlin 2, DAN family BMP antagonist [Source:HGNC Symbol;Acc:HGNC:17655]	2.49832	1.99607e-10		ENSMUSG00000050069	Grem2	gremlin 2 homolog, cysteine knot superfamily (Xenopus laevis) [Source:MGI Symbol;Acc:MGI:1344367]	1.17241	0.207317	1.34536	0.0647885	1.34027	4.36203e-05
ENSG00000067082	KLF6	Kruppel-like factor 6 [Source:HGNC Symbol;Acc:HGNC:2235]	2.4972	2.3053e-20		ENSMUSG00000000078	Klf6	Kruppel-like factor 6 [Source:MGI Symbol;Acc:MGI:1346318]	1.64286	3.78877e-06	2.33064	2.03783e-68	1.81104	2.76672e-38
ENSG00000135631	RAB11FIP5	RAB11 family interacting protein 5 (class I) [Source:HGNC Symbol;Acc:HGNC:24845]	2.49646	1.62046e-15		ENSMUSG00000051343	Rab11fip5	RAB11 family interacting protein 5 (class I) [Source:MGI Symbol;Acc:MGI:1098586]	0.993581	0.946636	0.782393	0.000133472	1.31805	3.1175e-09
ENSG00000166579	NDEL1	nudE neurodevelopment protein 1-like 1 [Source:HGNC Symbol;Acc:HGNC:17620]	2.4842	3.8639e-12		ENSMUSG00000018736	Ndel1	nuclear distribution gene E-like homolog 1 (A. nidulans) [Source:MGI Symbol;Acc:MGI:1932915]	3.56706	2.52324e-49	3.42472	1.42905e-101	2.91441	1.99068e-86
ENSG00000182963	GJC1	gap junction protein, gamma 1, 45kDa [Source:HGNC Symbol;Acc:HGNC:4280]	2.48342	1.10582e-09		ENSMUSG00000034520	Gjc1	gap junction protein, gamma 1 [Source:MGI Symbol;Acc:MGI:95718]	0.783535	0.037958	0.731558	1.53367e-05	1.18709	0.0320275
ENSG00000276023	DUSP14	dual specificity phosphatase 14 [Source:HGNC Symbol;Acc:HGNC:17007]	2.47592	2.18489e-09		ENSMUSG00000018648	Dusp14	dual specificity phosphatase 14 [Source:MGI Symbol;Acc:MGI:1927168]	7.27914	1.96704e-107	4.48213	2.30919e-83	5.79868	2.05433e-72
ENSG00000153714	LURAP1L	leucine rich adaptor protein 1-like [Source:HGNC Symbol;Acc:HGNC:31452]	2.46903	0.00132874		ENSMUSG00000048706	Lurap1l	leucine rich adaptor protein 1-like [Source:MGI Symbol;Acc:MGI:106510]	2.70729	3.6403e-13	2.41382	5.23022e-08	3.1524	1.24276e-32
ENSG00000120690	ELF1	E74-like factor 1 (ets domain transcription factor) [Source:HGNC Symbol;Acc:HGNC:3316]	2.46214	1.10919e-08		ENSMUSG00000036461	Elf1	E74-like factor 1 [Source:MGI Symbol;Acc:MGI:107180]	1.4792	0.000712458	1.83125	5.87192e-13	1.97511	1.32559e-22
ENSG00000164326	CARTPT	CART prepropeptide [Source:HGNC Symbol;Acc:HGNC:24323]	2.45468	0.00798		ENSMUSG00000021647	Cartpt	CART prepropeptide [Source:MGI Symbol;Acc:MGI:1351330]	4.81923	5.60201e-25	11.5161	2.49072e-17	4.03666	5.87121e-40
ENSG00000180008	SOCS4	suppressor of cytokine signaling 4 [Source:HGNC Symbol;Acc:HGNC:19392]	2.45279	1.14127e-06		ENSMUSG00000048379	Socs4	suppressor of cytokine signaling 4 [Source:MGI Symbol;Acc:MGI:1914546]	1.39075	0.0803265	1.1874	0.0165901	1.60306	2.02852e-13
ENSG00000100311	PDGFB	platelet-derived growth factor beta polypeptide [Source:HGNC Symbol;Acc:HGNC:8800]	2.44046	6.24783e-08		ENSMUSG00000000489	Pdgfb	platelet derived growth factor, B polypeptide [Source:MGI Symbol;Acc:MGI:97528]	0.891656	0.488458	0.947555	0.864437	1.14115	0.307796
ENSG00000106615	RHEB	Ras homolog enriched in brain [Source:HGNC Symbol;Acc:HGNC:10011]	2.43519	3.47719e-26		ENSMUSG00000028945	Rheb	Ras homolog enriched in brain [Source:MGI Symbol;Acc:MGI:97912]	3.08416	2.10501e-21	4.07933	1.5586e-170	2.21969	1.90065e-50
ENSG00000151617	EDNRA	endothelin receptor type A [Source:HGNC Symbol;Acc:HGNC:3179]	2.43249	0.000480369		ENSMUSG00000031616	Ednra	endothelin receptor type A [Source:MGI Symbol;Acc:MGI:105923]	0.905802	0.998439	0.61846	0.0381394	0.502044	1.16185e-11
ENSG00000197063	MAFG	v-maf avian musculoaponeurotic fibrosarcoma oncogene homolog G [Source:HGNC Symbol;Acc:HGNC:6781]	2.43027	4.57988e-12		ENSMUSG00000051510	Mafg	v-maf musculoaponeurotic fibrosarcoma oncogene family, protein G (avian) [Source:MGI Symbol;Acc:MGI:96911]	1.05046	0.636868	1.62306	2.53064e-18	1.6353	1.4807e-26
ENSG00000125657	TNFSF9	tumor necrosis factor (ligand) superfamily, member 9 [Source:HGNC Symbol;Acc:HGNC:11939]	2.42724	5.77878e-08		ENSMUSG00000035678	Tnfsf9	tumor necrosis factor (ligand) superfamily, member 9 [Source:MGI Symbol;Acc:MGI:1101058]	0.786935	0.644288	0.578095	0.0352148	0.742588	0.175784
ENSG00000147383	NSDHL	NAD(P) dependent steroid dehydrogenase-like [Source:HGNC Symbol;Acc:HGNC:13398]	2.42469	4.87323e-18		ENSMUSG00000031349	Nsdhl	NAD(P) dependent steroid dehydrogenase-like [Source:MGI Symbol;Acc:MGI:1099438]	0.788199	0.160507	0.797956	0.000320349	0.97923	0.783102
ENSG00000172893	DHCR7	7-dehydrocholesterol reductase [Source:HGNC Symbol;Acc:HGNC:2860]	2.41579	1.62046e-15		ENSMUSG00000058454	Dhcr7	7-dehydrocholesterol reductase [Source:MGI Symbol;Acc:MGI:1298378]	0.674831	0.00839262	0.619722	1.75947e-11	0.806732	2.34477e-05
ENSG00000169427	KCNK9	potassium channel, two pore domain subfamily K, member 9 [Source:HGNC Symbol;Acc:HGNC:6283]	2.41538	4.90296e-26		ENSMUSG00000036760	Kcnk9	potassium channel, subfamily K, member 9 [Source:MGI Symbol;Acc:MGI:3521816]	0.840366	0.283435	1.30236	0.00827979	1.11877	0.0540813
ENSG00000154127	UBASH3B	ubiquitin associated and SH3 domain containing B [Source:HGNC Symbol;Acc:HGNC:29884]	2.41181	3.55521e-18		ENSMUSG00000032020	Ubash3b	ubiquitin associated and SH3 domain containing, B [Source:MGI Symbol;Acc:MGI:1920078]	0.923635	0.598629	0.79756	0.000260392	1.688	7.86628e-16
ENSG00000163273	NPPC	natriuretic peptide C [Source:HGNC Symbol;Acc:HGNC:7941]	2.41041	0.00389627		ENSMUSG00000026241	Nppc	natriuretic peptide type C [Source:MGI Symbol;Acc:MGI:97369]	1.25645	0.258349	1.48158	0.128064	1.20798	0.327886
ENSG00000170145	SIK2	salt-inducible kinase 2 [Source:HGNC Symbol;Acc:HGNC:21680]	2.40857	2.09271e-16		ENSMUSG00000037112	Sik2	salt inducible kinase 2 [Source:MGI Symbol;Acc:MGI:2445031]	5.69364	6.65151e-48	5.63188	9.32873e-228	3.48917	2.0464e-15
ENSG00000169826	CSGALNACT2	chondroitin sulfate N-acetylgalactosaminyltransferase 2 [Source:HGNC Symbol;Acc:HGNC:24292]	2.40678	1.01438e-19		ENSMUSG00000042042	Csgalnact2	chondroitin sulfate N-acetylgalactosaminyltransferase 2 [Source:MGI Symbol;Acc:MGI:1926002]	0.815706	0.0918669	0.757727	0.000603944	1.13042	0.130278
ENSG00000134594	RAB33A	RAB33A, member RAS oncogene family [Source:HGNC Symbol;Acc:HGNC:9773]	2.4008	9.09185e-18		ENSMUSG00000031104	Rab33a	RAB33A, member RAS oncogene family [Source:MGI Symbol;Acc:MGI:109493]	0.774501	0.0817118	0.440241	3.96283e-24	0.72479	7.39715e-05
ENSG00000198805	PNP	purine nucleoside phosphorylase [Source:HGNC Symbol;Acc:HGNC:7892]	2.39551	1.7325e-07		ENSMUSG00000021871	Pnp	purine-nucleoside phosphorylase [Source:MGI Symbol;Acc:MGI:97365]	0.524145	9.75731e-09	0.715266	0.000156556	1.05029	0.683394
ENSG00000169895	SYAP1	synapse associated protein 1 [Source:HGNC Symbol;Acc:HGNC:16273]	2.39295	3.33383e-15		ENSMUSG00000031357	Syap1	synapse associated protein 1 [Source:MGI Symbol;Acc:MGI:1914293]	1.18546	0.022596	1.03726	0.682035	1.22095	0.000452377
ENSG00000137309	HMGA1	high mobility group AT-hook 1 [Source:HGNC Symbol;Acc:HGNC:5010]	2.38481	2.53233e-12		ENSMUSG00000046711	Hmga1	high mobility group AT-hook 1 [Source:MGI Symbol;Acc:MGI:96160]	1.05421	0.797245	1.34994	0.000466119	1.80572	1.92953e-16
ENSG00000166979	EVA1C	eva-1 homolog C (C. elegans) [Source:HGNC Symbol;Acc:HGNC:13239]	2.38426	2.12767e-05		ENSMUSG00000039903	Eva1c	eva-1 homolog C (C. elegans) [Source:MGI Symbol;Acc:MGI:1918217]	1.2888	0.469952	1.18213	0.62943	0.976733	0.95455
ENSG00000165389	SPTSSA	serine palmitoyltransferase, small subunit A [Source:HGNC Symbol;Acc:HGNC:20361]	2.38273	1.21357e-13		ENSMUSG00000044408	Sptssa	serine palmitoyltransferase, small subunit A [Source:MGI Symbol;Acc:MGI:1913399]	1.13531	0.23452	0.944217	0.559697	1.00312	0.96484
ENSG00000182158	CREB3L2	cAMP responsive element binding protein 3-like 2 [Source:HGNC Symbol;Acc:HGNC:23720]	2.37861	1.30151e-18		ENSMUSG00000038648	Creb3l2	cAMP responsive element binding protein 3-like 2 [Source:MGI Symbol;Acc:MGI:2442695]	1.75532	0.000311422	1.59946	2.27189e-08	1.43526	1.16745e-12
ENSG00000133612	AGAP3	ArfGAP with GTPase domain, ankyrin repeat and PH domain 3 [Source:HGNC Symbol;Acc:HGNC:16923]	2.37848	1.33101e-14		ENSMUSG00000023353	Agap3	ArfGAP with GTPase domain, ankyrin repeat and PH domain 3 [Source:MGI Symbol;Acc:MGI:2183446]	1.42376	4.59541e-05	1.33073	4.86688e-07	1.52816	1.22922e-20
ENSG00000143333	RGS16	regulator of G-protein signaling 16 [Source:HGNC Symbol;Acc:HGNC:9997]	2.37089	1.7227e-15		ENSMUSG00000026475	Rgs16	regulator of G-protein signaling 16 [Source:MGI Symbol;Acc:MGI:108407]	3.58345	6.56475e-22	1.92411	7.99848e-15	2.73799	3.74153e-37
ENSG00000125931	CITED1	Cbp/p300-interacting transactivator, with Glu/Asp-rich carboxy-terminal domain, 1 [Source:HGNC Symbol;Acc:HGNC:1986]	2.36874	0.0112908		ENSMUSG00000051159	Cited1	Cbp/p300-interacting transactivator with Glu/Asp-rich carboxy-terminal domain 1 [Source:MGI Symbol;Acc:MGI:108023]	3.25341	7.03411e-18	2.06329	0.00022616	3.49858	1.2597e-12
ENSG00000184205	TSPYL2	TSPY-like 2 [Source:HGNC Symbol;Acc:HGNC:24358]	2.36636	0.00284844		ENSMUSG00000041096	Tspyl2	TSPY-like 2 [Source:MGI Symbol;Acc:MGI:106244]	1.18408	0.0197377	2.31595	6.64534e-37	1.08211	0.215347
ENSG00000164169	PRMT9	protein arginine methyltransferase 9 [Source:HGNC Symbol;Acc:HGNC:25099]	2.36539	5.78078e-09		ENSMUSG00000037134	Prmt10	protein arginine methyltransferase 10 (putative) [Source:MGI Symbol;Acc:MGI:2142651]	0.85193	0.104981	0.725637	7.75801e-06	0.877042	0.107832
ENSG00000163602	RYBP	RING1 and YY1 binding protein [Source:HGNC Symbol;Acc:HGNC:10480]	2.36305	4.33187e-10		ENSMUSG00000072872	Rybp	RING1 and YY1 binding protein [Source:MGI Symbol;Acc:MGI:1929059]	2.05068	6.77742e-11	2.47083	2.1938e-33	1.91524	2.19988e-21
ENSG00000153443	UBALD1	UBA-like domain containing 1 [Source:HGNC Symbol;Acc:HGNC:29576]	2.35642	0.0139218		ENSMUSG00000039568	Ubald1	UBA-like domain containing 1 [Source:MGI Symbol;Acc:MGI:1916255]	2.68261	9.19068e-22	5.16009	4.13285e-182	2.24052	1.04795e-44
ENSG00000197380	DACT3	dishevelled-binding antagonist of beta-catenin 3 [Source:HGNC Symbol;Acc:HGNC:30745]	2.35617	2.62472e-12		ENSMUSG00000078794	Dact3	dapper homolog 3, antagonist of beta-catenin (xenopus) [Source:MGI Symbol;Acc:MGI:3654828]	1.16654	0.225525	1.52174	5.2908e-11	1.21918	0.000947438
ENSG00000099958	DERL3	derlin 3 [Source:HGNC Symbol;Acc:HGNC:14236]	2.3523	6.17953e-07		ENSMUSG00000009092	Derl3	Der1-like domain family, member 3 [Source:MGI Symbol;Acc:MGI:1917627]	0.920405	0.899067	1.14237	0.670298	1.05569	0.917844
ENSG00000151014	NOCT	nocturnin [Source:HGNC Symbol;Acc:HGNC:14254]	2.35097	3.76371e-06		ENSMUSG00000023087	Ccrn4l	CCR4 carbon catabolite repression 4-like (S. cerevisiae) [Source:MGI Symbol;Acc:MGI:109382]	1.3695	0.00114142	1.9092	1.08738e-23	1.79375	5.19798e-26
ENSG00000119801	YPEL5	yippee-like 5 [Source:HGNC Symbol;Acc:HGNC:18329]	2.34988	2.11037e-10		ENSMUSG00000039770	Ypel5	yippee-like 5 (Drosophila) [Source:MGI Symbol;Acc:MGI:1916937]	1.57053	9.01541e-11	1.27641	0.000157323	1.59077	1.00654e-17
ENSG00000077782	FGFR1	fibroblast growth factor receptor 1 [Source:HGNC Symbol;Acc:HGNC:3688]	2.34327	1.30338e-10		ENSMUSG00000031565	Fgfr1	fibroblast growth factor receptor 1 [Source:MGI Symbol;Acc:MGI:95522]	2.21781	8.16203e-12	2.09236	5.73105e-38	1.7466	4.18396e-06
ENSG00000175352	NRIP3	nuclear receptor interacting protein 3 [Source:HGNC Symbol;Acc:HGNC:1167]	2.3408	5.43766e-09		ENSMUSG00000034825	Nrip3	nuclear receptor interacting protein 3 [Source:MGI Symbol;Acc:MGI:1925843]	1.37996	1.48913e-05	1.38175	0.000155649	1.98249	1.35284e-24
ENSG00000072274	TFRC	transferrin receptor [Source:HGNC Symbol;Acc:HGNC:11763]	2.33347	1.08452e-14		ENSMUSG00000022797	Tfrc	transferrin receptor [Source:MGI Symbol;Acc:MGI:98822]	1.28135	0.0326024	1.36144	2.66529e-10	1.63426	0.000163483
ENSG00000197483	ZNF628	zinc finger protein 628 [Source:HGNC Symbol;Acc:HGNC:28054]	2.33152	4.39911e-14		ENSMUSG00000074406	Zfp628	zinc finger protein 628 [Source:MGI Symbol;Acc:MGI:2665174]	0.824955	0.0840198	1.0875	0.608565	1.44445	1.68501e-05
ENSG00000204590	GNL1	guanine nucleotide binding protein-like 1 [Source:HGNC Symbol;Acc:HGNC:4413]	2.32487	9.44856e-12		ENSMUSG00000024429	Gnl1	guanine nucleotide binding protein-like 1 [Source:MGI Symbol;Acc:MGI:95764]	1.43105	0.000186513	1.34007	2.65059e-08	1.55974	2.9755e-23
ENSG00000107554	DNMBP	dynamin binding protein [Source:HGNC Symbol;Acc:HGNC:30373]	2.32435	2.68467e-05		ENSMUSG00000025195	Dnmbp	dynamin binding protein [Source:MGI Symbol;Acc:MGI:1917352]	0.866293	0.282935	0.921101	0.502243	1.35157	4.47048e-05
ENSG00000196368	NUDT11	nudix (nucleoside diphosphate linked moiety X)-type motif 11 [Source:HGNC Symbol;Acc:HGNC:18011]	2.32383	9.16245e-07		ENSMUSG00000073295	Nudt11	nudix (nucleoside diphosphate linked moiety X)-type motif 11 [Source:MGI Symbol;Acc:MGI:1930957]	1.04075	0.784048	1.06595	0.413605	1.01593	0.853823
ENSG00000197265	GTF2E2	general transcription factor IIE, polypeptide 2, beta 34kDa [Source:HGNC Symbol;Acc:HGNC:4651]	2.32136	7.66563e-22		ENSMUSG00000031585	Gtf2e2	general transcription factor II E, polypeptide 2 (beta subunit) [Source:MGI Symbol;Acc:MGI:1915403]	1.73807	1.05286e-06	1.13314	0.119401	1.06513	0.465516
ENSG00000118503	TNFAIP3	tumor necrosis factor, alpha-induced protein 3 [Source:HGNC Symbol;Acc:HGNC:11896]	2.32059	1.05917e-12		ENSMUSG00000019850	Tnfaip3	tumor necrosis factor, alpha-induced protein 3 [Source:MGI Symbol;Acc:MGI:1196377]	1.45168	0.0312008	2.32155	1.74241e-10	2.0635	5.50045e-09
ENSG00000181350	LRRC75A	leucine rich repeat containing 75A [Source:HGNC Symbol;Acc:HGNC:32403]	2.31738	5.13167e-33		ENSMUSG00000046417	Lrrc75a	leucine rich repeat containing 75A [Source:MGI Symbol;Acc:MGI:2682293]	1.53394	0.000452847	1.04436	0.746911	1.38853	2.05162e-05
ENSG00000179833	SERTAD2	SERTA domain containing 2 [Source:HGNC Symbol;Acc:HGNC:30784]	2.31683	1.62858e-08		ENSMUSG00000049800	Sertad2	SERTA domain containing 2 [Source:MGI Symbol;Acc:MGI:1931026]	2.95712	2.91023e-25	1.8038	6.05659e-24	1.64273	2.10674e-12
ENSG00000163399	ATP1A1	ATPase, Na+/K+ transporting, alpha 1 polypeptide [Source:HGNC Symbol;Acc:HGNC:799]	2.31681	4.20338e-31		ENSMUSG00000033161	Atp1a1	ATPase, Na+/K+ transporting, alpha 1 polypeptide [Source:MGI Symbol;Acc:MGI:88105]	1.88276	4.40355e-10	2.61636	7.45559e-86	1.7919	2.19071e-39
ENSG00000140320	BAHD1	bromo adjacent homology domain containing 1 [Source:HGNC Symbol;Acc:HGNC:29153]	2.31666	2.52674e-08		ENSMUSG00000040007	Bahd1	bromo adjacent homology domain containing 1 [Source:MGI Symbol;Acc:MGI:2139371]	1.33486	0.000484408	1.36305	1.19399e-07	1.47625	6.91729e-11
ENSG00000161011	SQSTM1	sequestosome 1 [Source:HGNC Symbol;Acc:HGNC:11280]	2.31614	5.68999e-09		ENSMUSG00000015837	Sqstm1	sequestosome 1 [Source:MGI Symbol;Acc:MGI:107931]	1.43806	3.14841e-07	1.49433	1.3578e-15	1.67096	3.11404e-36
ENSG00000179331	RAB39A	RAB39A, member RAS oncogene family [Source:HGNC Symbol;Acc:HGNC:16521]	2.3117	1.03379e-06		ENSMUSG00000055069	Rab39	RAB39, member RAS oncogene family [Source:MGI Symbol;Acc:MGI:2442855]	1.41476	0.0448852	1.01155	0.99224	1.54264	0.014874
ENSG00000151012	SLC7A11	solute carrier family 7 (anionic amino acid transporter light chain, xc- system), member 11 [Source:HGNC Symbol;Acc:HGNC:11059]	2.30646	0.0154841		ENSMUSG00000027737	Slc7a11	solute carrier family 7 (cationic amino acid transporter, y+ system), member 11 [Source:MGI Symbol;Acc:MGI:1347355]	1.47715	0.636672	0.989874	0.992222	0.965832	0.627417
ENSG00000147324	MFHAS1	malignant fibrous histiocytoma amplified sequence 1 [Source:HGNC Symbol;Acc:HGNC:16982]	2.30495	6.20236e-22		ENSMUSG00000070056	Mfhas1	malignant fibrous histiocytoma amplified sequence 1 [Source:MGI Symbol;Acc:MGI:1098644]	1.07768	0.659344	1.32095	4.23972e-06	1.58031	6.56285e-16
ENSG00000133135	RNF128	ring finger protein 128, E3 ubiquitin protein ligase [Source:HGNC Symbol;Acc:HGNC:21153]	2.30455	0.000270671		ENSMUSG00000031438	Rnf128	ring finger protein 128 [Source:MGI Symbol;Acc:MGI:1914139]	2.59719	8.42267e-27	3.58585	2.52373e-46	3.16731	2.07541e-07
ENSG00000008083	JARID2	jumonji, AT rich interactive domain 2 [Source:HGNC Symbol;Acc:HGNC:6196]	2.29835	3.74069e-09		ENSMUSG00000038518	Jarid2	jumonji, AT rich interactive domain 2 [Source:MGI Symbol;Acc:MGI:104813]	3.17542	2.21466e-29	3.92369	5.4293e-154	1.87299	1.8616e-28
ENSG00000166436	TRIM66	tripartite motif containing 66 [Source:HGNC Symbol;Acc:HGNC:29005]	2.29394	7.59872e-07		ENSMUSG00000031026	Trim66	tripartite motif-containing 66 [Source:MGI Symbol;Acc:MGI:2152406]	2.59181	2.01887e-12	10.9106	3.56256e-83	4.02177	7.27084e-19
ENSG00000178074	C2orf69	chromosome 2 open reading frame 69 [Source:HGNC Symbol;Acc:HGNC:26799]	2.2922	1.33911e-16		ENSMUSG00000038323	1700066M21Rik	RIKEN cDNA 1700066M21 gene [Source:MGI Symbol;Acc:MGI:1920717]	0.647354	1.11766e-09	0.67302	8.93385e-09	0.717952	0.000404938
ENSG00000006128	TAC1	tachykinin, precursor 1 [Source:HGNC Symbol;Acc:HGNC:11517]	2.29007	7.10417e-25		ENSMUSG00000061762	Tac1	tachykinin 1 [Source:MGI Symbol;Acc:MGI:98474]	1.85215	1.7377e-07	6.73512	1.1637e-07	8.34355	8.22211e-51
ENSG00000133275	CSNK1G2	casein kinase 1, gamma 2 [Source:HGNC Symbol;Acc:HGNC:2455]	2.28784	9.48508e-19		ENSMUSG00000003345	Csnk1g2	casein kinase 1, gamma 2 [Source:MGI Symbol;Acc:MGI:1920014]	1.16784	0.29072	1.21692	0.000431997	1.47262	1.0916e-16
ENSG00000171988	JMJD1C	jumonji domain containing 1C [Source:HGNC Symbol;Acc:HGNC:12313]	2.28571	8.15107e-06		ENSMUSG00000037876	Jmjd1c	jumonji domain containing 1C [Source:MGI Symbol;Acc:MGI:1918614]	3.25547	7.33711e-25	2.41745	1.87632e-78	2.00915	5.84969e-29
ENSG00000081181	ARG2	arginase 2 [Source:HGNC Symbol;Acc:HGNC:664]	2.28562	4.49998e-20		ENSMUSG00000021125	Arg2	arginase type II [Source:MGI Symbol;Acc:MGI:1330806]	2.3806	2.54339e-20	1.22354	0.0253212	2.10255	2.38155e-10
ENSG00000144802	NFKBIZ	nuclear factor of kappa light polypeptide gene enhancer in B-cells inhibitor, zeta [Source:HGNC Symbol;Acc:HGNC:29805]	2.28022	1.14226e-06		ENSMUSG00000035356	Nfkbiz	nuclear factor of kappa light polypeptide gene enhancer in B cells inhibitor, zeta [Source:MGI Symbol;Acc:MGI:1931595]	5.28381	9.41739e-32	5.55415	7.38829e-43	4.63496	1.5502e-72
ENSG00000128594	LRRC4	leucine rich repeat containing 4 [Source:HGNC Symbol;Acc:HGNC:15586]	2.27786	7.38868e-18		ENSMUSG00000049939	Lrrc4	leucine rich repeat containing 4 [Source:MGI Symbol;Acc:MGI:2182081]	1.80173	6.79134e-05	2.30909	1.60059e-48	1.85444	1.81999e-24
ENSG00000138386	NAB1	NGFI-A binding protein 1 (EGR1 binding protein 1) [Source:HGNC Symbol;Acc:HGNC:7626]	2.27624	2.12638e-10		ENSMUSG00000002881	Nab1	Ngfi-A binding protein 1 [Source:MGI Symbol;Acc:MGI:107564]	1.925	4.63197e-11	4.02453	2.27567e-82	2.72326	4.2496e-48
ENSG00000154479	CCDC173	coiled-coil domain containing 173 [Source:HGNC Symbol;Acc:HGNC:25064]	2.27465	9.46899e-08		ENSMUSG00000070883	Ccdc173	coiled-coil domain containing 173 [Source:MGI Symbol;Acc:MGI:1923100]	1.1535	0.707095	0.732782	0.0632084	0.649328	0.106177
ENSG00000151929	BAG3	BCL2-associated athanogene 3 [Source:HGNC Symbol;Acc:HGNC:939]	2.27231	1.91108e-10		ENSMUSG00000030847	Bag3	BCL2-associated athanogene 3 [Source:MGI Symbol;Acc:MGI:1352493]	4.35712	6.01888e-20	1.70843	0.00286415	1.76297	1.1545e-18
ENSG00000168994	PXDC1	PX domain containing 1 [Source:HGNC Symbol;Acc:HGNC:21361]	2.26969	2.30495e-05		ENSMUSG00000021411	Pxdc1	PX domain containing 1 [Source:MGI Symbol;Acc:MGI:1914145]	2.78018	4.17475e-10	1.45472	0.000173472	2.17303	1.68137e-18
ENSG00000150457	LATS2	large tumor suppressor kinase 2 [Source:HGNC Symbol;Acc:HGNC:6515]	2.2696	1.13708e-13		ENSMUSG00000021959	Lats2	large tumor suppressor 2 [Source:MGI Symbol;Acc:MGI:1354386]	3.63099	3.3815e-59	2.88323	1.6719e-67	2.07479	5.46337e-36
ENSG00000186907	RTN4RL2	reticulon 4 receptor-like 2 [Source:HGNC Symbol;Acc:HGNC:23053]	2.26834	2.56453e-08		ENSMUSG00000050896	Rtn4rl2	reticulon 4 receptor-like 2 [Source:MGI Symbol;Acc:MGI:2669796]	1.60737	4.15834e-05	1.25175	0.0780154	1.74265	1.49615e-05
ENSG00000185222	WBP5	WW domain binding protein 5 [Source:HGNC Symbol;Acc:HGNC:30084]	2.26754	1.87486e-17		ENSMUSG00000042712	Wbp5	WW domain binding protein 5 [Source:MGI Symbol;Acc:MGI:109567]	2.57719	2.05471e-30	2.77266	8.32366e-58	1.74656	8.71181e-37
ENSG00000166233	ARIH1	ariadne RBR E3 ubiquitin protein ligase 1 [Source:HGNC Symbol;Acc:HGNC:689]	2.26277	1.37277e-08		ENSMUSG00000025234	Arih1	ariadne ubiquitin-conjugating enzyme E2 binding protein homolog 1 (Drosophila) [Source:MGI Symbol;Acc:MGI:1344363]	3.26776	1.3324e-41	3.26201	1.11134e-92	2.17598	4.86069e-47
ENSG00000138709	LARP1B	La ribonucleoprotein domain family, member 1B [Source:HGNC Symbol;Acc:HGNC:24704]	2.26156	2.37843e-16		ENSMUSG00000025762	Larp1b	La ribonucleoprotein domain family, member 1B [Source:MGI Symbol;Acc:MGI:1914604]	1.27497	0.016654	1.17308	0.132549	1.61018	1.2911e-06
ENSG00000092445	TYRO3	TYRO3 protein tyrosine kinase [Source:HGNC Symbol;Acc:HGNC:12446]	2.26062	1.55718e-05		ENSMUSG00000027298	Tyro3	TYRO3 protein tyrosine kinase 3 [Source:MGI Symbol;Acc:MGI:104294]	1.11784	0.394794	1.28939	0.00168098	1.32313	1.37534e-07
ENSG00000110880	CORO1C	coronin, actin binding protein, 1C [Source:HGNC Symbol;Acc:HGNC:2254]	2.25755	2.02457e-18		ENSMUSG00000004530	Coro1c	coronin, actin binding protein 1C [Source:MGI Symbol;Acc:MGI:1345964]	0.710838	8.71908e-08	0.692465	7.02805e-13	1.02948	0.629839
ENSG00000130766	SESN2	sestrin 2 [Source:HGNC Symbol;Acc:HGNC:20746]	2.25473	0.0111517		ENSMUSG00000028893	Sesn2	sestrin 2 [Source:MGI Symbol;Acc:MGI:2651874]	6.52815	1.65753e-65	6.43634	1.38112e-255	2.59682	1.37919e-11
ENSG00000168556	ING2	inhibitor of growth family, member 2 [Source:HGNC Symbol;Acc:HGNC:6063]	2.25357	6.84398e-13		ENSMUSG00000063049	Ing2	inhibitor of growth family, member 2 [Source:MGI Symbol;Acc:MGI:1916510]	2.19567	4.02154e-07	1.51319	1.86607e-06	2.00968	4.08548e-18
ENSG00000158711	ELK4	ELK4, ETS-domain protein (SRF accessory protein 1) [Source:HGNC Symbol;Acc:HGNC:3326]	2.25256	1.31802e-07		ENSMUSG00000026436	Elk4	ELK4, member of ETS oncogene family [Source:MGI Symbol;Acc:MGI:102853]	2.73862	4.5933e-09	2.2684	4.57481e-41	1.94954	9.41111e-20
ENSG00000119138	KLF9	Kruppel-like factor 9 [Source:HGNC Symbol;Acc:HGNC:1123]	2.25256	2.23414e-08		ENSMUSG00000033863	Klf9	Kruppel-like factor 9 [Source:MGI Symbol;Acc:MGI:1333856]	4.65798	1.31694e-47	16.2054	2.76762e-61	2.82606	3.51682e-07
ENSG00000169504	CLIC4	chloride intracellular channel 4 [Source:HGNC Symbol;Acc:HGNC:13518]	2.24951	8.71939e-09		ENSMUSG00000037242	Clic4	chloride intracellular channel 4 (mitochondrial) [Source:MGI Symbol;Acc:MGI:1352754]	1.74518	0.00517989	1.40084	1.59267e-10	1.42818	1.59294e-14
ENSG00000104635	SLC39A14	solute carrier family 39 (zinc transporter), member 14 [Source:HGNC Symbol;Acc:HGNC:20858]	2.24557	3.20102e-14		ENSMUSG00000022094	Slc39a14	solute carrier family 39 (zinc transporter), member 14 [Source:MGI Symbol;Acc:MGI:2384851]	2.1861	4.82535e-28	1.55514	1.4244e-11	1.77878	1.81059e-27
ENSG00000139289	PHLDA1	pleckstrin homology-like domain, family A, member 1 [Source:HGNC Symbol;Acc:HGNC:8933]	2.24463	1.38819e-06		ENSMUSG00000020205	Phlda1	pleckstrin homology-like domain, family A, member 1 [Source:MGI Symbol;Acc:MGI:1096880]	1.25612	0.00692944	1.42101	0.0582058	1.41138	1.767e-05
ENSG00000087087	SRRT	serrate, RNA effector molecule [Source:HGNC Symbol;Acc:HGNC:24101]	2.23114	4.20397e-05		ENSMUSG00000037364	Srrt	serrate RNA effector molecule homolog (Arabidopsis) [Source:MGI Symbol;Acc:MGI:1933527]	1.80932	1.26416e-11	1.65735	1.74516e-22	1.89512	2.35941e-40
ENSG00000249992	TMEM158	transmembrane protein 158 (gene/pseudogene) [Source:HGNC Symbol;Acc:HGNC:30293]	2.23077	1.02672e-06		ENSMUSG00000054871	Tmem158	transmembrane protein 158 [Source:MGI Symbol;Acc:MGI:1919559]	0.612258	0.000148561	1.09725	0.280991	0.988204	0.938432
ENSG00000198908	BHLHB9	basic helix-loop-helix domain containing, class B, 9 [Source:HGNC Symbol;Acc:HGNC:29353]	2.22544	9.17288e-09		ENSMUSG00000072964	Bhlhb9	basic helix-loop-helix domain containing, class B9 [Source:MGI Symbol;Acc:MGI:1917487]	1.15509	0.0942804	0.865928	0.0207566	1.04685	0.446169
ENSG00000174485	DENND4A	DENN/MADD domain containing 4A [Source:HGNC Symbol;Acc:HGNC:24321]	2.22368	9.73363e-07		ENSMUSG00000053641	Dennd4a	DENN/MADD domain containing 4A [Source:MGI Symbol;Acc:MGI:2142979]	2.65184	2.10819e-24	2.9776	8.71897e-99	1.53676	9.75441e-12
ENSG00000118900	UBN1	ubinuclein 1 [Source:HGNC Symbol;Acc:HGNC:12506]	2.22044	1.36767e-11		ENSMUSG00000039473	Ubn1	ubinuclein 1 [Source:MGI Symbol;Acc:MGI:1891307]	3.58567	3.82425e-45	2.71218	3.97401e-81	2.56511	4.0753e-61
ENSG00000123908	AGO2	argonaute RISC catalytic component 2 [Source:HGNC Symbol;Acc:HGNC:3263]	2.21764	1.60351e-06		ENSMUSG00000036698	Ago2	argonaute RISC catalytic subunit 2 [Source:MGI Symbol;Acc:MGI:2446632]	1.28449	0.0113481	1.83486	8.19133e-30	1.44306	5.17026e-15
ENSG00000198369	SPRED2	sprouty-related, EVH1 domain containing 2 [Source:HGNC Symbol;Acc:HGNC:17722]	2.21094	2.17314e-09		ENSMUSG00000045671	Spred2	sprouty-related, EVH1 domain containing 2 [Source:MGI Symbol;Acc:MGI:2150019]	1.06315	0.595658	1.6226	8.80661e-08	1.8118	1.61328e-20
ENSG00000108861	DUSP3	dual specificity phosphatase 3 [Source:HGNC Symbol;Acc:HGNC:3069]	2.21007	5.51089e-24		ENSMUSG00000003518	Dusp3	dual specificity phosphatase 3 (vaccinia virus phosphatase VH1-related) [Source:MGI Symbol;Acc:MGI:1919599]	1.05381	0.763003	1.81863	6.79121e-24	1.88012	1.15124e-35
ENSG00000180537	RNF182	ring finger protein 182 [Source:HGNC Symbol;Acc:HGNC:28522]	2.20949	3.51668e-06		ENSMUSG00000044164	Rnf182	ring finger protein 182 [Source:MGI Symbol;Acc:MGI:3045355]	1.36081	9.99248e-05	0.76579	0.000205289	1.65199	4.7657e-12
ENSG00000103121	CMC2	C-x(9)-C motif containing 2 [Source:HGNC Symbol;Acc:HGNC:24447]	2.20425	1.29559e-11		ENSMUSG00000014633	Cmc2	COX assembly mitochondrial protein 2 [Source:MGI Symbol;Acc:MGI:1913781]	0.952098	0.850284	0.667113	0.00519711	0.787375	0.104448
ENSG00000065833	ME1	malic enzyme 1, NADP(+)-dependent, cytosolic [Source:HGNC Symbol;Acc:HGNC:6983]	2.20066	1.45383e-05		ENSMUSG00000032418	Me1	malic enzyme 1, NADP(+)-dependent, cytosolic [Source:MGI Symbol;Acc:MGI:97043]	1.24088	0.0644241	1.14712	0.0763943	1.37372	2.91997e-10
ENSG00000254656	RTL1	retrotransposon-like 1 [Source:HGNC Symbol;Acc:HGNC:14665]	2.19907	1.08558e-10		ENSMUSG00000085925	Rtl1	retrotransposon-like 1 [Source:MGI Symbol;Acc:MGI:2656842]	0.553574	2.68559e-05	1.63067	1.00662e-07	1.17769	0.245591
ENSG00000177469	PTRF	polymerase I and transcript release factor [Source:HGNC Symbol;Acc:HGNC:9688]	2.1989	5.8396e-06		ENSMUSG00000004044	Ptrf	polymerase I and transcript release factor [Source:MGI Symbol;Acc:MGI:1277968]	2.37504	8.07538e-10	1.35014	0.000304151	1.99694	1.28456e-46
ENSG00000198887	SMC5	structural maintenance of chromosomes 5 [Source:HGNC Symbol;Acc:HGNC:20465]	2.19669	1.23775e-09		ENSMUSG00000024943	Smc5	structural maintenance of chromosomes 5 [Source:MGI Symbol;Acc:MGI:2385088]	1.33283	0.00754445	1.10645	0.134694	1.01923	0.823986
ENSG00000187867	PALM3	paralemmin 3 [Source:HGNC Symbol;Acc:HGNC:33274]	2.19549	2.30824e-10		ENSMUSG00000047986	Palm3	paralemmin 3 [Source:MGI Symbol;Acc:MGI:1921587]	0.602841	7.96633e-05	0.339393	3.02629e-12	1.13175	0.25546
ENSG00000102119	EMD	emerin [Source:HGNC Symbol;Acc:HGNC:3331]	2.19445	1.00643e-19		ENSMUSG00000001964	Emd	emerin [Source:MGI Symbol;Acc:MGI:108117]	4.57288	6.62423e-97	6.78058	1.30347e-223	2.51012	2.30069e-62
ENSG00000158615	PPP1R15B	protein phosphatase 1, regulatory subunit 15B [Source:HGNC Symbol;Acc:HGNC:14951]	2.19439	1.26821e-06		ENSMUSG00000046062	Ppp1r15b	protein phosphatase 1, regulatory (inhibitor) subunit 15b [Source:MGI Symbol;Acc:MGI:2444211]	5.59005	2.03311e-76	4.29439	1.81391e-162	2.54781	1.46164e-56
ENSG00000058063	ATP11B	ATPase, class VI, type 11B [Source:HGNC Symbol;Acc:HGNC:13553]	2.1939	2.68185e-10		ENSMUSG00000037400	Atp11b	ATPase, class VI, type 11B [Source:MGI Symbol;Acc:MGI:1923545]	1.02869	0.719025	1.21273	0.004499	0.902545	0.082017
ENSG00000108106	UBE2S	ubiquitin-conjugating enzyme E2S [Source:HGNC Symbol;Acc:HGNC:17895]	2.19066	5.72399e-07		ENSMUSG00000060860	Ube2s	ubiquitin-conjugating enzyme E2S [Source:MGI Symbol;Acc:MGI:1925141]	2.23058	1.99849e-14	2.18874	6.89307e-40	1.87794	1.58987e-21
ENSG00000170522	ELOVL6	ELOVL fatty acid elongase 6 [Source:HGNC Symbol;Acc:HGNC:15829]	2.18979	2.52932e-10		ENSMUSG00000041220	Elovl6	ELOVL family member 6, elongation of long chain fatty acids (yeast) [Source:MGI Symbol;Acc:MGI:2156528]	1.53582	3.2633e-06	1.64835	8.1394e-24	1.62318	2.4104e-16
ENSG00000136802	LRRC8A	leucine rich repeat containing 8 family, member A [Source:HGNC Symbol;Acc:HGNC:19027]	2.18882	7.26963e-13		ENSMUSG00000007476	Lrrc8a	leucine rich repeat containing 8A [Source:MGI Symbol;Acc:MGI:2652847]	1.12013	0.525633	0.849541	0.0904893	1.23884	0.0232496
ENSG00000069956	MAPK6	mitogen-activated protein kinase 6 [Source:HGNC Symbol;Acc:HGNC:6879]	2.18209	1.26848e-11		ENSMUSG00000042688	Mapk6	mitogen-activated protein kinase 6 [Source:MGI Symbol;Acc:MGI:1354946]	1.43683	2.57962e-09	1.46541	5.00715e-12	1.49459	3.76651e-20
ENSG00000164032	H2AFZ	H2A histone family, member Z [Source:HGNC Symbol;Acc:HGNC:4741]	2.18084	1.67603e-13		ENSMUSG00000037894	H2afz	H2A histone family, member Z [Source:MGI Symbol;Acc:MGI:1888388]	1.88044	1.20224e-18	1.90049	1.17802e-38	1.65279	9.7722e-20
ENSG00000153487	ING1	inhibitor of growth family, member 1 [Source:HGNC Symbol;Acc:HGNC:6062]	2.18026	6.92862e-10		ENSMUSG00000045969	Ing1	inhibitor of growth family, member 1 [Source:MGI Symbol;Acc:MGI:1349481]	0.902017	0.284439	1.19495	0.0152929	1.17227	0.0225136
ENSG00000125968	ID1	inhibitor of DNA binding 1, dominant negative helix-loop-helix protein [Source:HGNC Symbol;Acc:HGNC:5360]	2.18001	4.03978e-06		ENSMUSG00000042745	Id1	inhibitor of DNA binding 1 [Source:MGI Symbol;Acc:MGI:96396]	1.48564	0.0856556	1.28724	0.0283498	1.28767	0.000407072
ENSG00000006634	DBF4	DBF4 zinc finger [Source:HGNC Symbol;Acc:HGNC:17364]	2.17961	3.60246e-07		ENSMUSG00000002297	Dbf4	DBF4 homolog (S. cerevisiae) [Source:MGI Symbol;Acc:MGI:1351328]	2.41639	8.31437e-19	2.01399	6.1979e-29	1.93054	1.27706e-14
ENSG00000142871	CYR61	cysteine-rich, angiogenic inducer, 61 [Source:HGNC Symbol;Acc:HGNC:2654]	2.17847	2.57354e-07		ENSMUSG00000028195	Cyr61	cysteine rich protein 61 [Source:MGI Symbol;Acc:MGI:88613]	14.4547	1.21797e-92	6.21417	4.71005e-246	3.58576	6.91884e-69
ENSG00000150054	MPP7	membrane protein, palmitoylated 7 (MAGUK p55 subfamily member 7) [Source:HGNC Symbol;Acc:HGNC:26542]	2.17757	5.86692e-09		ENSMUSG00000057440	Mpp7	membrane protein, palmitoylated 7 (MAGUK p55 subfamily member 7) [Source:MGI Symbol;Acc:MGI:1922989]	3.00639	1.04178e-15	6.22489	1.06869e-159	2.40075	3.47834e-27
ENSG00000011105	TSPAN9	tetraspanin 9 [Source:HGNC Symbol;Acc:HGNC:21640]	2.17707	1.68744e-06		ENSMUSG00000030352	Tspan9	tetraspanin 9 [Source:MGI Symbol;Acc:MGI:1924558]	0.90392	0.720751	0.792176	0.000277783	1.02589	0.712729
ENSG00000170681	MURC	muscle-related coiled-coil protein [Source:HGNC Symbol;Acc:HGNC:33742]	2.17375	3.80848e-11		ENSMUSG00000028348	Murc	muscle-related coiled-coil protein [Source:MGI Symbol;Acc:MGI:1915266]	1.68416	0.0482579	1.22106	0.263505	1.21562	0.564843
ENSG00000070495	JMJD6	jumonji domain containing 6 [Source:HGNC Symbol;Acc:HGNC:19355]	2.17341	7.98025e-12		ENSMUSG00000056962	Jmjd6	jumonji domain containing 6 [Source:MGI Symbol;Acc:MGI:1858910]	1.31607	0.00566759	0.996696	0.979498	1.37164	5.97965e-08
ENSG00000197147	LRRC8B	leucine rich repeat containing 8 family, member B [Source:HGNC Symbol;Acc:HGNC:30692]	2.16333	3.76486e-05		ENSMUSG00000070639	Lrrc8b	leucine rich repeat containing 8 family, member B [Source:MGI Symbol;Acc:MGI:2141353]	0.822778	0.0550691	0.890158	0.0348588	0.955152	0.524674
ENSG00000127863	TNFRSF19	tumor necrosis factor receptor superfamily, member 19 [Source:HGNC Symbol;Acc:HGNC:11915]	2.16195	4.44221e-07		ENSMUSG00000060548	Tnfrsf19	tumor necrosis factor receptor superfamily, member 19 [Source:MGI Symbol;Acc:MGI:1352474]	0.978162	0.922453	0.931199	0.386072	1.37655	1.48742e-05
ENSG00000078269	SYNJ2	synaptojanin 2 [Source:HGNC Symbol;Acc:HGNC:11504]	2.16054	8.64808e-05		ENSMUSG00000023805	Synj2	synaptojanin 2 [Source:MGI Symbol;Acc:MGI:1201671]	0.844134	0.0862144	0.977848	0.899781	1.14683	0.270322
ENSG00000155330	C16orf87	chromosome 16 open reading frame 87 [Source:HGNC Symbol;Acc:HGNC:33754]	2.16046	3.08748e-13		ENSMUSG00000036934	4921524J17Rik	RIKEN cDNA 4921524J17 gene [Source:MGI Symbol;Acc:MGI:1913964]	1.78076	2.9304e-05	0.790636	0.00679138	1.31942	0.00795773
ENSG00000196588	MKL1	megakaryoblastic leukemia (translocation) 1 [Source:HGNC Symbol;Acc:HGNC:14334]	2.15952	1.19518e-05		ENSMUSG00000042292	Mkl1	MKL (megakaryoblastic leukemia)/myocardin-like 1 [Source:MGI Symbol;Acc:MGI:2384495]	0.763499	0.000167996	0.841618	0.0141021	1.49678	2.94425e-13
ENSG00000175906	ARL4D	ADP-ribosylation factor-like 4D [Source:HGNC Symbol;Acc:HGNC:656]	2.1584	7.13591e-14		ENSMUSG00000034936	Arl4d	ADP-ribosylation factor-like 4D [Source:MGI Symbol;Acc:MGI:1933155]	3.68199	1.53186e-05	1.57914	0.368769	2.05807	2.30739e-05
ENSG00000178974	FBXO34	F-box protein 34 [Source:HGNC Symbol;Acc:HGNC:20201]	2.15612	2.38697e-14		ENSMUSG00000037536	Fbxo34	F-box protein 34 [Source:MGI Symbol;Acc:MGI:1926188]	0.943225	0.692049	1.18602	0.0315689	1.60177	9.84653e-12
ENSG00000157764	BRAF	B-Raf proto-oncogene, serine/threonine kinase [Source:HGNC Symbol;Acc:HGNC:1097]	2.15551	4.32392e-10		ENSMUSG00000002413	Braf	Braf transforming gene [Source:MGI Symbol;Acc:MGI:88190]	3.27616	2.17429e-31	3.65315	5.04543e-86	1.80087	1.8316e-20
ENSG00000103126	AXIN1	axin 1 [Source:HGNC Symbol;Acc:HGNC:903]	2.15225	1.64574e-11		ENSMUSG00000024182	Axin1	axin 1 [Source:MGI Symbol;Acc:MGI:1096327]	1.18384	0.0371221	1.41395	1.0776e-07	1.50549	2.49278e-14
ENSG00000123505	AMD1	adenosylmethionine decarboxylase 1 [Source:HGNC Symbol;Acc:HGNC:457]	2.15177	4.41004e-24		ENSMUSG00000075232	Amd1	S-adenosylmethionine decarboxylase 1 [Source:MGI Symbol;Acc:MGI:88004]	1.54096	9.14944e-10	1.56496	1.35042e-12	1.86864	5.48923e-24
ENSG00000109220	CHIC2	cysteine-rich hydrophobic domain 2 [Source:HGNC Symbol;Acc:HGNC:1935]	2.15155	8.52066e-05		ENSMUSG00000029229	Chic2	cysteine-rich hydrophobic domain 2 [Source:MGI Symbol;Acc:MGI:1921527]	1.12613	0.627346	0.969674	0.78931	1.14173	0.0923653
ENSG00000117479	SLC19A2	solute carrier family 19 (thiamine transporter), member 2 [Source:HGNC Symbol;Acc:HGNC:10938]	2.14807	1.403e-12		ENSMUSG00000040918	Slc19a2	solute carrier family 19 (thiamine transporter), member 2 [Source:MGI Symbol;Acc:MGI:1928761]	1.9561	9.86306e-13	1.68916	5.51946e-12	1.27465	0.000464329
ENSG00000095564	BTAF1	BTAF1 RNA polymerase II, B-TFIID transcription factor-associated, 170kDa [Source:HGNC Symbol;Acc:HGNC:17307]	2.14694	1.50588e-10		ENSMUSG00000040565	Btaf1	BTAF1 RNA polymerase II, B-TFIID transcription factor-associated, (Mot1 homolog, S. cerevisiae) [Source:MGI Symbol;Acc:MGI:2147538]	3.3233	7.13295e-23	3.07927	9.5709e-113	2.14796	1.73143e-32
ENSG00000121966	CXCR4	chemokine (C-X-C motif) receptor 4 [Source:HGNC Symbol;Acc:HGNC:2561]	2.1461	1.56401e-18		ENSMUSG00000045382	Cxcr4	chemokine (C-X-C motif) receptor 4 [Source:MGI Symbol;Acc:MGI:109563]	1.4123	0.0123124	0.861884	0.0504749	1.15655	0.0357929
ENSG00000139722	VPS37B	vacuolar protein sorting 37 homolog B (S. cerevisiae) [Source:HGNC Symbol;Acc:HGNC:25754]	2.14572	9.3172e-11		ENSMUSG00000066278	Vps37b	vacuolar protein sorting 37B (yeast) [Source:MGI Symbol;Acc:MGI:1916724]	5.58365	1.47188e-33	2.68564	1.1325e-07	2.33529	7.67811e-27
ENSG00000170485	NPAS2	neuronal PAS domain protein 2 [Source:HGNC Symbol;Acc:HGNC:7895]	2.14178	3.55454e-10		ENSMUSG00000026077	Npas2	neuronal PAS domain protein 2 [Source:MGI Symbol;Acc:MGI:109232]	0.63075	0.000317125	1.33169	0.140375	1.8705	0.000115613
ENSG00000110921	MVK	mevalonate kinase [Source:HGNC Symbol;Acc:HGNC:7530]	2.13996	1.36639e-34		ENSMUSG00000041939	Mvk	mevalonate kinase [Source:MGI Symbol;Acc:MGI:107624]	0.925189	0.716594	0.711396	8.31558e-07	1.16329	0.0067558
ENSG00000158710	TAGLN2	transgelin 2 [Source:HGNC Symbol;Acc:HGNC:11554]	2.13866	1.68152e-10		ENSMUSG00000026547	Tagln2	transgelin 2 [Source:MGI Symbol;Acc:MGI:1312985]	1.25833	0.126328	1.29466	0.00614763	1.33035	7.50674e-06
ENSG00000152944	MED21	mediator complex subunit 21 [Source:HGNC Symbol;Acc:HGNC:11473]	2.13615	9.79087e-14		ENSMUSG00000030291	Med21	mediator complex subunit 21 [Source:MGI Symbol;Acc:MGI:1347064]	0.859464	0.275215	0.56221	1.24827e-11	0.87163	0.149091
ENSG00000174574	AKIRIN1	akirin 1 [Source:HGNC Symbol;Acc:HGNC:25744]	2.13566	5.02105e-13		ENSMUSG00000023075	Akirin1	akirin 1 [Source:MGI Symbol;Acc:MGI:1915300]	1.64914	8.90352e-06	1.5041	4.39532e-13	1.68623	5.85738e-26
ENSG00000125347	IRF1	interferon regulatory factor 1 [Source:HGNC Symbol;Acc:HGNC:6116]	2.13424	0.000243262		ENSMUSG00000018899	Irf1	interferon regulatory factor 1 [Source:MGI Symbol;Acc:MGI:96590]	1.24792	0.419664	1.90488	6.72356e-07	1.3552	0.000837415
ENSG00000067191	CACNB1	calcium channel, voltage-dependent, beta 1 subunit [Source:HGNC Symbol;Acc:HGNC:1401]	2.13384	6.1972e-09		ENSMUSG00000020882	Cacnb1	calcium channel, voltage-dependent, beta 1 subunit [Source:MGI Symbol;Acc:MGI:102522]	0.989424	0.945193	0.722589	6.95835e-08	1.24654	0.000187455
ENSG00000166478	ZNF143	zinc finger protein 143 [Source:HGNC Symbol;Acc:HGNC:12928]	2.13216	3.0628e-07		ENSMUSG00000061079	Zfp143	zinc finger protein 143 [Source:MGI Symbol;Acc:MGI:1277969]	0.829179	0.222429	1.20143	0.022518	1.57134	1.25285e-07
ENSG00000133858	ZFC3H1	zinc finger, C3H1-type containing [Source:HGNC Symbol;Acc:HGNC:28328]	2.13115	4.93007e-07		ENSMUSG00000034163	Zfc3h1	zinc finger, C3H1-type containing [Source:MGI Symbol;Acc:MGI:2446143]	2.75225	1.91722e-21	2.57547	7.78631e-86	1.60838	2.77135e-22
ENSG00000101255	TRIB3	tribbles pseudokinase 3 [Source:HGNC Symbol;Acc:HGNC:16228]	2.12412	2.27728e-09		ENSMUSG00000032715	Trib3	tribbles homolog 3 (Drosophila) [Source:MGI Symbol;Acc:MGI:1345675]	2.55131	0.0723444	3.00065	4.18795e-06	1.53434	1.04732e-06
ENSG00000131873	CHSY1	chondroitin sulfate synthase 1 [Source:HGNC Symbol;Acc:HGNC:17198]	2.12409	1.67027e-10		ENSMUSG00000032640	Chsy1	chondroitin sulfate synthase 1 [Source:MGI Symbol;Acc:MGI:2681120]	0.919588	0.535474	1.02274	0.824482	1.3242	0.000610441
ENSG00000187079	TEAD1	TEA domain family member 1 (SV40 transcriptional enhancer factor) [Source:HGNC Symbol;Acc:HGNC:11714]	2.12346	5.36562e-05		ENSMUSG00000055320	Tead1	TEA domain family member 1 [Source:MGI Symbol;Acc:MGI:101876]	4.4734	2.97909e-16	2.46468	5.97444e-50	1.69959	4.38617e-32
ENSG00000129250	KIF1C	kinesin family member 1C [Source:HGNC Symbol;Acc:HGNC:6317]	2.12312	1.4761e-13		ENSMUSG00000020821	Kif1c	kinesin family member 1C [Source:MGI Symbol;Acc:MGI:1098260]	1.56265	0.000984103	1.22748	0.00119422	1.54875	7.06699e-23
ENSG00000026652	AGPAT4	1-acylglycerol-3-phosphate O-acyltransferase 4 [Source:HGNC Symbol;Acc:HGNC:20885]	2.12285	2.02355e-07		ENSMUSG00000023827	Agpat4	1-acylglycerol-3-phosphate O-acyltransferase 4 (lysophosphatidic acid acyltransferase, delta) [Source:MGI Symbol;Acc:MGI:1915512]	1.36195	0.0074294	1.49124	3.06451e-12	1.52875	8.22788e-14
ENSG00000112576	CCND3	cyclin D3 [Source:HGNC Symbol;Acc:HGNC:1585]	2.12167	1.35342e-10		ENSMUSG00000034165	Ccnd3	cyclin D3 [Source:MGI Symbol;Acc:MGI:88315]	3.04483	1.14062e-56	1.38974	7.03424e-06	1.28329	1.59409e-05
ENSG00000131759	RARA	retinoic acid receptor, alpha [Source:HGNC Symbol;Acc:HGNC:9864]	2.11846	1.08452e-14		ENSMUSG00000037992	Rara	retinoic acid receptor, alpha [Source:MGI Symbol;Acc:MGI:97856]	1.94658	8.88169e-11	2.13302	5.74136e-25	1.34681	0.000127491
ENSG00000165006	UBAP1	ubiquitin associated protein 1 [Source:HGNC Symbol;Acc:HGNC:12461]	2.11497	2.06341e-10		ENSMUSG00000028437	Ubap1	ubiquitin-associated protein 1 [Source:MGI Symbol;Acc:MGI:2149543]	2.22766	2.76187e-37	1.43581	3.69349e-10	1.39712	6.17494e-10
ENSG00000197930	ERO1A	endoplasmic reticulum oxidoreductase alpha [Source:HGNC Symbol;Acc:HGNC:13280]	2.10884	1.1579e-17		ENSMUSG00000021831	Ero1l	ERO1-like (S. cerevisiae) [Source:MGI Symbol;Acc:MGI:1354385]	1.49344	0.00650055	1.04598	0.704162	1.30674	9.57229e-06
ENSG00000275832	ARHGAP23	Rho GTPase activating protein 23 [Source:HGNC Symbol;Acc:HGNC:29293]	2.10789	5.51406e-09		ENSMUSG00000049807	Arhgap23	Rho GTPase activating protein 23 [Source:MGI Symbol;Acc:MGI:3697726]	1.43458	0.000198303	1.80245	1.66481e-25	1.70967	1.15261e-30
ENSG00000160999	SH2B2	SH2B adaptor protein 2 [Source:HGNC Symbol;Acc:HGNC:17381]	2.10722	2.38368e-10		ENSMUSG00000005057	Sh2b2	SH2B adaptor protein 2 [Source:MGI Symbol;Acc:MGI:1345171]	0.678364	0.011708	0.714159	8.29859e-07	0.861825	0.126645
ENSG00000162413	KLHL21	kelch-like family member 21 [Source:HGNC Symbol;Acc:HGNC:29041]	2.10709	5.1246e-06		ENSMUSG00000073700	Klhl21	kelch-like 21 [Source:MGI Symbol;Acc:MGI:1919288]	0.569206	8.13987e-05	1.05516	0.673829	2.44182	1.53532e-35
ENSG00000180720	CHRM4	cholinergic receptor, muscarinic 4 [Source:HGNC Symbol;Acc:HGNC:1953]	2.10691	0.000573845		ENSMUSG00000040495	Chrm4	cholinergic receptor, muscarinic 4 [Source:MGI Symbol;Acc:MGI:88399]	2.12269	1.74707e-14	2.3364	1.17624e-09	3.37395	2.57179e-12
ENSG00000177363	LRRN4CL	LRRN4 C-terminal like [Source:HGNC Symbol;Acc:HGNC:33724]	2.10663	0.0309365		ENSMUSG00000071656	Lrrn4cl	LRRN4 C-terminal like [Source:MGI Symbol;Acc:MGI:1916102]	1.84049	0.00542333	3.0278	8.76016e-08	1.13603	0.442353
ENSG00000083857	FAT1	FAT atypical cadherin 1 [Source:HGNC Symbol;Acc:HGNC:3595]	2.10565	5.9187e-06		ENSMUSG00000070047	Fat1	FAT tumor suppressor homolog 1 (Drosophila) [Source:MGI Symbol;Acc:MGI:109168]	2.80852	3.76012e-17	1.94751	6.03625e-34	1.40799	2.48981e-16
ENSG00000103018	CYB5B	cytochrome b5 type B (outer mitochondrial membrane) [Source:HGNC Symbol;Acc:HGNC:24374]	2.1008	1.87021e-09		ENSMUSG00000031924	Cyb5b	cytochrome b5 type B [Source:MGI Symbol;Acc:MGI:1913677]	0.859447	0.191989	0.892116	0.0635845	1.03238	0.57228
ENSG00000104756	KCTD9	potassium channel tetramerization domain containing 9 [Source:HGNC Symbol;Acc:HGNC:22401]	2.1006	4.85719e-08		ENSMUSG00000034327	Kctd9	potassium channel tetramerisation domain containing 9 [Source:MGI Symbol;Acc:MGI:2145579]	1.20234	0.258647	0.998086	0.982527	1.66115	8.40802e-11
ENSG00000102401	ARMCX3	armadillo repeat containing, X-linked 3 [Source:HGNC Symbol;Acc:HGNC:24065]	2.10006	1.69916e-11		ENSMUSG00000049047	Armcx3	armadillo repeat containing, X-linked 3 [Source:MGI Symbol;Acc:MGI:1918953]	1.89065	3.05108e-19	2.08074	4.14137e-36	1.56209	9.76684e-14
ENSG00000118523	CTGF	connective tissue growth factor [Source:HGNC Symbol;Acc:HGNC:2500]	2.09954	2.41657e-08		ENSMUSG00000019997	Ctgf	connective tissue growth factor [Source:MGI Symbol;Acc:MGI:95537]	1.58082	5.34748e-05	2.21472	1.12946e-18	2.58475	1.6741e-36
ENSG00000160570	DEDD2	death effector domain containing 2 [Source:HGNC Symbol;Acc:HGNC:24450]	2.09763	1.11328e-05		ENSMUSG00000054499	Dedd2	death effector domain-containing DNA binding protein 2 [Source:MGI Symbol;Acc:MGI:1914629]	1.59574	1.37724e-08	1.21749	0.0861289	1.78082	2.4925e-08
ENSG00000100003	SEC14L2	SEC14-like lipid binding 2 [Source:HGNC Symbol;Acc:HGNC:10699]	2.09561	6.04054e-07		ENSMUSG00000003585	Sec14l2	SEC14-like 2 (S. cerevisiae) [Source:MGI Symbol;Acc:MGI:1915065]	0.661232	0.000345697	0.692201	0.00163955	0.741742	0.0146516
ENSG00000173812	EIF1	eukaryotic translation initiation factor 1 [Source:HGNC Symbol;Acc:HGNC:3249]	2.0916	1.8863e-12		ENSMUSG00000035530	Eif1	eukaryotic translation initiation factor 1 [Source:MGI Symbol;Acc:MGI:105125]	1.84274	5.1744e-15	2.6383	1.52854e-49	1.82152	8.7494e-43
ENSG00000110047	EHD1	EH-domain containing 1 [Source:HGNC Symbol;Acc:HGNC:3242]	2.0888	4.7266e-12		ENSMUSG00000024772	Ehd1	EH-domain containing 1 [Source:MGI Symbol;Acc:MGI:1341878]	1.12458	0.253293	0.827841	0.00100559	1.50793	9.33287e-17
ENSG00000171303	KCNK3	potassium channel, two pore domain subfamily K, member 3 [Source:HGNC Symbol;Acc:HGNC:6278]	2.0856	8.36106e-13		ENSMUSG00000049265	Kcnk3	potassium channel, subfamily K, member 3 [Source:MGI Symbol;Acc:MGI:1100509]	0.512549	3.45544e-05	0.516524	1.23042e-05	1.30589	0.00756271
ENSG00000145390	USP53	ubiquitin specific peptidase 53 [Source:HGNC Symbol;Acc:HGNC:29255]	2.08397	2.68153e-05		ENSMUSG00000039701	Usp53	ubiquitin specific peptidase 53 [Source:MGI Symbol;Acc:MGI:2139607]	1.20312	0.325828	1.12498	0.186567	1.55719	2.45099e-12
ENSG00000100664	EIF5	eukaryotic translation initiation factor 5 [Source:HGNC Symbol;Acc:HGNC:3299]	2.08375	4.87267e-07		ENSMUSG00000021282	Eif5	eukaryotic translation initiation factor 5 [Source:MGI Symbol;Acc:MGI:95309]	1.34744	7.71462e-06	1.43341	3.37883e-10	1.61158	6.02664e-33
ENSG00000198909	MAP3K3	mitogen-activated protein kinase kinase kinase 3 [Source:HGNC Symbol;Acc:HGNC:6855]	2.08331	4.39704e-05		ENSMUSG00000020700	Map3k3	mitogen-activated protein kinase kinase kinase 3 [Source:MGI Symbol;Acc:MGI:1346874]	1.20732	0.164462	1.38144	5.63201e-07	1.48437	5.46565e-12
ENSG00000147454	SLC25A37	solute carrier family 25 (mitochondrial iron transporter), member 37 [Source:HGNC Symbol;Acc:HGNC:29786]	2.0828	2.13105e-07		ENSMUSG00000034248	Slc25a37	solute carrier family 25, member 37 [Source:MGI Symbol;Acc:MGI:1914962]	2.45336	2.26649e-17	2.25566	6.40871e-19	2.1343	1.78622e-16
ENSG00000173166	RAPH1	Ras association (RalGDS/AF-6) and pleckstrin homology domains 1 [Source:HGNC Symbol;Acc:HGNC:14436]	2.08067	3.92502e-05		ENSMUSG00000026014	Raph1	Ras association (RalGDS/AF-6) and pleckstrin homology domains 1 [Source:MGI Symbol;Acc:MGI:1924550]	0.727546	0.000321473	0.759572	0.000626285	0.770444	1.21716e-07
ENSG00000166002	SMCO4	single-pass membrane protein with coiled-coil domains 4 [Source:HGNC Symbol;Acc:HGNC:24810]	2.08001	0.000142478		ENSMUSG00000058173	Smco4	single-pass membrane protein with coiled-coil domains 4 [Source:MGI Symbol;Acc:MGI:3039636]	0.492261	0.0159619	0.463864	0.00536655	0.76682	0.143609
ENSG00000169710	FASN	fatty acid synthase [Source:HGNC Symbol;Acc:HGNC:3594]	2.07984	4.4771e-12		ENSMUSG00000025153	Fasn	fatty acid synthase [Source:MGI Symbol;Acc:MGI:95485]	0.89771	0.445391	0.721178	1.28056e-09	1.38033	3.12566e-13
ENSG00000137252	HCRTR2	hypocretin (orexin) receptor 2 [Source:HGNC Symbol;Acc:HGNC:4849]	2.07771	1.14213e-08		ENSMUSG00000032360	Hcrtr2	hypocretin (orexin) receptor 2 [Source:MGI Symbol;Acc:MGI:2680765]	0.987856	0.958345	0.955319	0.841118	0.759595	0.0727199
ENSG00000156381	ANKRD9	ankyrin repeat domain 9 [Source:HGNC Symbol;Acc:HGNC:20096]	2.07627	3.37605e-12		ENSMUSG00000037904	Ankrd9	ankyrin repeat domain 9 [Source:MGI Symbol;Acc:MGI:1921501]	1.11432	0.596499	0.907075	0.709473	1.87161	0.000146953
ENSG00000005175	RPAP3	RNA polymerase II associated protein 3 [Source:HGNC Symbol;Acc:HGNC:26151]	2.0762	9.71265e-19		ENSMUSG00000022466	Rpap3	RNA polymerase II associated protein 3 [Source:MGI Symbol;Acc:MGI:1277218]	0.690916	0.000350425	0.59272	3.76417e-15	0.669285	1.62363e-06
ENSG00000109929	SC5D	sterol-C5-desaturase [Source:HGNC Symbol;Acc:HGNC:10547]	2.07259	2.05593e-26		ENSMUSG00000032018	Sc5d	sterol-C5-desaturase (fungal ERG3, delta-5-desaturase) homolog (S. cerevisae) [Source:MGI Symbol;Acc:MGI:1353611]	2.53316	2.39591e-42	2.97475	4.93697e-79	3.66939	1.95867e-98
ENSG00000133069	TMCC2	transmembrane and coiled-coil domain family 2 [Source:HGNC Symbol;Acc:HGNC:24239]	2.07238	8.15363e-15		ENSMUSG00000042066	Tmcc2	transmembrane and coiled-coil domains 2 [Source:MGI Symbol;Acc:MGI:1916125]	0.906725	0.415729	0.814435	0.000342827	0.952753	0.442871
ENSG00000116273	PHF13	PHD finger protein 13 [Source:HGNC Symbol;Acc:HGNC:22983]	2.07048	4.48861e-09		ENSMUSG00000047777	Phf13	PHD finger protein 13 [Source:MGI Symbol;Acc:MGI:2446217]	2.239	1.36212e-27	2.24485	2.04001e-36	1.79357	9.80592e-27
ENSG00000145911	N4BP3	NEDD4 binding protein 3 [Source:HGNC Symbol;Acc:HGNC:29852]	2.06989	6.81577e-18		ENSMUSG00000001053	N4bp3	NEDD4 binding protein 3 [Source:MGI Symbol;Acc:MGI:2442218]	0.96152	0.860095	0.576363	2.12393e-05	1.10691	0.471492
ENSG00000128228	SDF2L1	stromal cell-derived factor 2-like 1 [Source:HGNC Symbol;Acc:HGNC:10676]	2.06926	8.44806e-06		ENSMUSG00000022769	Sdf2l1	stromal cell-derived factor 2-like 1 [Source:MGI Symbol;Acc:MGI:2149842]	0.948886	0.850171	0.685776	0.00368062	0.866941	0.505055
ENSG00000167522	ANKRD11	ankyrin repeat domain 11 [Source:HGNC Symbol;Acc:HGNC:21316]	2.06816	7.25977e-06		ENSMUSG00000035569	Ankrd11	ankyrin repeat domain 11 [Source:MGI Symbol;Acc:MGI:1924337]	1.98742	1.73868e-09	2.05885	1.02213e-38	1.75059	3.34964e-32
ENSG00000123094	RASSF8	Ras association (RalGDS/AF-6) domain family (N-terminal) member 8 [Source:HGNC Symbol;Acc:HGNC:13232]	2.06641	5.5986e-17		ENSMUSG00000030259	Rassf8	Ras association (RalGDS/AF-6) domain family (N-terminal) member 8 [Source:MGI Symbol;Acc:MGI:1918573]	2.21056	1.60291e-11	1.39264	3.49212e-05	1.72938	1.26607e-25
ENSG00000162923	WDR26	WD repeat domain 26 [Source:HGNC Symbol;Acc:HGNC:21208]	2.06581	3.16593e-09		ENSMUSG00000038733	Wdr26	WD repeat domain 26 [Source:MGI Symbol;Acc:MGI:1923825]	1.22263	0.0308802	1.46737	5.44804e-10	1.34829	1.18633e-12
ENSG00000119950	MXI1	MAX interactor 1, dimerization protein [Source:HGNC Symbol;Acc:HGNC:7534]	2.06334	2.90206e-07		ENSMUSG00000025025	Mxi1	Max interacting protein 1 [Source:MGI Symbol;Acc:MGI:97245]	3.34438	9.9024e-32	2.86283	5.62497e-54	2.36349	7.7591e-45
ENSG00000111783	RFX4	regulatory factor X, 4 (influences HLA class II expression) [Source:HGNC Symbol;Acc:HGNC:9985]	2.06276	4.24397e-12		ENSMUSG00000020037	Rfx4	regulatory factor X, 4 (influences HLA class II expression) [Source:MGI Symbol;Acc:MGI:1918387]	1.47876	0.332592	1.63253	3.72586e-08	1.04426	0.577966
ENSG00000067992	PDK3	pyruvate dehydrogenase kinase, isozyme 3 [Source:HGNC Symbol;Acc:HGNC:8811]	2.06002	2.44364e-09		ENSMUSG00000035232	Pdk3	pyruvate dehydrogenase kinase, isoenzyme 3 [Source:MGI Symbol;Acc:MGI:2384308]	2.90616	4.57025e-32	2.70319	2.74199e-40	1.47676	3.88318e-08
ENSG00000210107	MT-TQ	mitochondrially encoded tRNA glutamine [Source:HGNC Symbol;Acc:HGNC:7495]	2.05748	0.310972		ENSMUSG00000064343	mt-Tq	mitochondrially encoded tRNA glutamine [Source:MGI Symbol;Acc:MGI:102477]	1.2679	0.763028	0.758236	0.68462	1.94266	0.209017
ENSG00000114450	GNB4	guanine nucleotide binding protein (G protein), beta polypeptide 4 [Source:HGNC Symbol;Acc:HGNC:20731]	2.05741	6.57777e-15		ENSMUSG00000027669	Gnb4	guanine nucleotide binding protein (G protein), beta 4 [Source:MGI Symbol;Acc:MGI:104581]	0.786017	0.0844015	0.786908	0.00222877	0.849711	0.00498757
ENSG00000011295	TTC19	tetratricopeptide repeat domain 19 [Source:HGNC Symbol;Acc:HGNC:26006]	2.05696	1.59333e-07		ENSMUSG00000042298	Ttc19	tetratricopeptide repeat domain 19 [Source:MGI Symbol;Acc:MGI:1920045]	1.74121	1.28317e-06	1.9875	1.16981e-36	1.64993	9.42599e-18
ENSG00000143590	EFNA3	ephrin-A3 [Source:HGNC Symbol;Acc:HGNC:3223]	2.05631	8.0405e-11		ENSMUSG00000028039	Efna3	ephrin A3 [Source:MGI Symbol;Acc:MGI:106644]	0.721915	0.0110432	0.583061	1.60619e-13	0.709619	2.64162e-06
ENSG00000113407	TARS	threonyl-tRNA synthetase [Source:HGNC Symbol;Acc:HGNC:11572]	2.05551	7.53732e-06		ENSMUSG00000022241	Tars	threonyl-tRNA synthetase [Source:MGI Symbol;Acc:MGI:106314]	1.50428	0.00014397	1.50799	1.20491e-14	1.66396	7.40224e-25
ENSG00000116761	CTH	cystathionine gamma-lyase [Source:HGNC Symbol;Acc:HGNC:2501]	2.05477	2.17701e-07		ENSMUSG00000028179	Cth	cystathionase (cystathionine gamma-lyase) [Source:MGI Symbol;Acc:MGI:1339968]	1.54973	0.00458799	1.26861	0.191809	0.98117	0.948544
ENSG00000141543	EIF4A3	eukaryotic translation initiation factor 4A3 [Source:HGNC Symbol;Acc:HGNC:18683]	2.05239	1.88549e-06		ENSMUSG00000025580	Eif4a3	eukaryotic translation initiation factor 4A3 [Source:MGI Symbol;Acc:MGI:1923731]	1.39751	3.80526e-05	0.989988	0.912012	1.15793	0.00981634
ENSG00000151151	IPMK	inositol polyphosphate multikinase [Source:HGNC Symbol;Acc:HGNC:20739]	2.05152	6.7927e-08		ENSMUSG00000060733	Ipmk	inositol polyphosphate multikinase [Source:MGI Symbol;Acc:MGI:1916968]	0.499655	1.81946e-16	0.566389	5.77354e-19	0.943557	0.495742
ENSG00000173575	CHD2	chromodomain helicase DNA binding protein 2 [Source:HGNC Symbol;Acc:HGNC:1917]	2.05131	3.87683e-05		ENSMUSG00000078671	Chd2	chromodomain helicase DNA binding protein 2 [Source:MGI Symbol;Acc:MGI:2448567]	4.40999	2.35047e-52	3.64057	9.63426e-146	2.75132	2.32265e-89
ENSG00000115419	GLS	glutaminase [Source:HGNC Symbol;Acc:HGNC:4331]	2.05021	2.85073e-06		ENSMUSG00000026103	Gls	glutaminase [Source:MGI Symbol;Acc:MGI:95752]	1.36072	2.55613e-07	1.82103	6.2266e-37	1.77927	5.96898e-36
ENSG00000102531	FNDC3A	fibronectin type III domain containing 3A [Source:HGNC Symbol;Acc:HGNC:20296]	2.04819	1.02276e-08		ENSMUSG00000033487	Fndc3a	fibronectin type III domain containing 3A [Source:MGI Symbol;Acc:MGI:1196463]	1.34769	0.00109916	1.11892	0.081836	1.48395	6.21293e-13
ENSG00000125650	PSPN	persephin [Source:HGNC Symbol;Acc:HGNC:9579]	2.04656	0.000252252		ENSMUSG00000002664	Pspn	persephin [Source:MGI Symbol;Acc:MGI:1201684]	0.799268	0.790047	0.731716	0.55453	0.431428	0.200785
ENSG00000183624	HMCES	5-hydroxymethylcytosine (hmC) binding, ES cell-specific [Source:HGNC Symbol;Acc:HGNC:24446]	2.04605	1.94542e-09		ENSMUSG00000030060	Hmces	5-hydroxymethylcytosine (hmC) binding, ES cell specific [Source:MGI Symbol;Acc:MGI:1914053]	0.849485	0.245478	0.791743	0.00955597	1.05326	0.681989
ENSG00000133316	WDR74	WD repeat domain 74 [Source:HGNC Symbol;Acc:HGNC:25529]	2.04496	1.70811e-08		ENSMUSG00000042729	Wdr74	WD repeat domain 74 [Source:MGI Symbol;Acc:MGI:2147427]	0.913425	0.36896	1.01925	0.863638	1.04955	0.593043
ENSG00000224470	ATXN1L	ataxin 1-like [Source:HGNC Symbol;Acc:HGNC:33279]	2.04278	2.33309e-06		ENSMUSG00000069895	Atxn1l	ataxin 1-like [Source:MGI Symbol;Acc:MGI:3694797]	0.908777	0.53928	1.15948	0.0212196	1.40098	2.94031e-10
ENSG00000118402	ELOVL4	ELOVL fatty acid elongase 4 [Source:HGNC Symbol;Acc:HGNC:14415]	2.04209	2.58938e-09		ENSMUSG00000032262	Elovl4	elongation of very long chain fatty acids (FEN1/Elo2, SUR4/Elo3, yeast)-like 4 [Source:MGI Symbol;Acc:MGI:1933331]	1.38051	0.00664387	1.33464	3.10629e-06	1.53228	8.99252e-19
ENSG00000120705	ETF1	eukaryotic translation termination factor 1 [Source:HGNC Symbol;Acc:HGNC:3477]	2.04016	3.16993e-09		ENSMUSG00000024360	Etf1	eukaryotic translation termination factor 1 [Source:MGI Symbol;Acc:MGI:2385071]	2.04631	2.33e-21	1.96474	7.85654e-32	1.52888	8.33876e-21
ENSG00000177875	CCDC184	coiled-coil domain containing 184 [Source:HGNC Symbol;Acc:HGNC:33749]	2.0391	4.0616e-17		ENSMUSG00000029875	Ccdc184	coiled-coil domain containing 184 [Source:MGI Symbol;Acc:MGI:2146066]	1.42163	0.0133578	3.02515	6.34904e-61	1.15333	0.0121031
ENSG00000184481	FOXO4	forkhead box O4 [Source:HGNC Symbol;Acc:HGNC:7139]	2.0384	8.86673e-09		ENSMUSG00000042903	Foxo4	forkhead box O4 [Source:MGI Symbol;Acc:MGI:1891915]	1.89811	3.49258e-08	1.26491	0.0241981	1.22472	0.00144331
ENSG00000140332	TLE3	transducin-like enhancer of split 3 [Source:HGNC Symbol;Acc:HGNC:11839]	2.03775	6.07445e-10		ENSMUSG00000032280	Tle3	transducin-like enhancer of split 3, homolog of Drosophila E(spl) [Source:MGI Symbol;Acc:MGI:104634]	2.05651	8.90749e-16	1.47219	2.66892e-14	1.37136	2.76428e-08
ENSG00000163961	RNF168	ring finger protein 168, E3 ubiquitin protein ligase [Source:HGNC Symbol;Acc:HGNC:26661]	2.03754	2.11951e-08		ENSMUSG00000014074	Rnf168	ring finger protein 168 [Source:MGI Symbol;Acc:MGI:1917488]	0.405341	1.3324e-41	0.611979	3.65464e-17	0.659692	9.33729e-10
ENSG00000135540	NHSL1	NHS-like 1 [Source:HGNC Symbol;Acc:HGNC:21021]	2.03642	2.684e-05		ENSMUSG00000039835	Nhsl1	NHS-like 1 [Source:MGI Symbol;Acc:MGI:106390]	1.21956	0.152326	1.00357	0.94637	1.33255	4.86951e-07
ENSG00000153046	CDYL	chromodomain protein, Y-like [Source:HGNC Symbol;Acc:HGNC:1811]	2.03618	1.26183e-11		ENSMUSG00000059288	Cdyl	chromodomain protein, Y chromosome-like [Source:MGI Symbol;Acc:MGI:1339956]	2.35511	8.84331e-06	1.04798	0.743699	1.89462	2.99505e-16
ENSG00000172568	FNDC9	fibronectin type III domain containing 9 [Source:HGNC Symbol;Acc:HGNC:33547]	2.03252	5.14279e-10		ENSMUSG00000048721	Fndc9	fibronectin type III domain containing 9 [Source:MGI Symbol;Acc:MGI:2443410]	8.15837	1.21846e-49	8.55952	6.31403e-155	11.2425	3.46683e-78
ENSG00000127824	TUBA4A	tubulin, alpha 4a [Source:HGNC Symbol;Acc:HGNC:12407]	2.02846	0.00689572		ENSMUSG00000026202	Tuba4a	tubulin, alpha 4A [Source:MGI Symbol;Acc:MGI:1095410]	0.731432	0.139322	1.10402	0.330979	1.23025	0.000139711
ENSG00000127920	GNG11	guanine nucleotide binding protein (G protein), gamma 11 [Source:HGNC Symbol;Acc:HGNC:4403]	2.02766	1.18414e-13		ENSMUSG00000032766	Gng11	guanine nucleotide binding protein (G protein), gamma 11 [Source:MGI Symbol;Acc:MGI:1913316]	2.00098	0.0247167	1.08205	0.841839	1.12394	0.565687
ENSG00000160888	IER2	immediate early response 2 [Source:HGNC Symbol;Acc:HGNC:28871]	2.02702	1.5617e-09		ENSMUSG00000053560	Ier2	immediate early response 2 [Source:MGI Symbol;Acc:MGI:104815]	19.1691	0	14.6453	2.92165e-30	2.13916	1.53744e-14
ENSG00000149289	ZC3H12C	zinc finger CCCH-type containing 12C [Source:HGNC Symbol;Acc:HGNC:29362]	2.02437	1.26684e-07		ENSMUSG00000035164	Zc3h12c	zinc finger CCCH type containing 12C [Source:MGI Symbol;Acc:MGI:3026959]	2.74962	1.28422e-07	4.362	4.66108e-154	2.78304	7.91919e-43
ENSG00000167615	LENG8	leukocyte receptor cluster (LRC) member 8 [Source:HGNC Symbol;Acc:HGNC:15500]	2.02402	5.37006e-07		ENSMUSG00000035545	Leng8	leukocyte receptor cluster (LRC) member 8 [Source:MGI Symbol;Acc:MGI:2142195]	4.35609	1.67866e-37	5.87639	0	2.4358	3.22037e-66
ENSG00000153879	CEBPG	CCAAT/enhancer binding protein (C/EBP), gamma [Source:HGNC Symbol;Acc:HGNC:1837]	2.02365	1.37277e-08		ENSMUSG00000056216	Cebpg	CCAAT/enhancer binding protein (C/EBP), gamma [Source:MGI Symbol;Acc:MGI:104982]	2.35989	9.25524e-10	2.98582	7.4187e-67	1.90749	6.08812e-30
ENSG00000162613	FUBP1	far upstream element (FUSE) binding protein 1 [Source:HGNC Symbol;Acc:HGNC:4004]	2.02334	6.26009e-06		ENSMUSG00000028034	Fubp1	far upstream element (FUSE) binding protein 1 [Source:MGI Symbol;Acc:MGI:1196294]	2.06857	3.63028e-18	2.06751	2.1617e-56	2.30696	1.44054e-64
ENSG00000011021	CLCN6	chloride channel, voltage-sensitive 6 [Source:HGNC Symbol;Acc:HGNC:2024]	2.0219	1.57676e-19		ENSMUSG00000029016	Clcn6	chloride channel 6 [Source:MGI Symbol;Acc:MGI:1347049]	1.11671	0.220171	1.3419	1.65581e-08	1.87593	7.09692e-40
ENSG00000106080	FKBP14	FK506 binding protein 14, 22 kDa [Source:HGNC Symbol;Acc:HGNC:18625]	2.0215	2.24464e-10		ENSMUSG00000038074	Fkbp14	FK506 binding protein 14 [Source:MGI Symbol;Acc:MGI:2387639]	1.70452	0.000316197	1.34299	0.00304299	1.18672	0.00617999
ENSG00000183684	ALYREF	Aly/REF export factor [Source:HGNC Symbol;Acc:HGNC:19071]	2.02131	2.91189e-05		ENSMUSG00000025134	Alyref	Aly/REF export factor [Source:MGI Symbol;Acc:MGI:1341044]	1.24811	0.0382985	1.26351	0.000108634	1.1826	0.015541
ENSG00000163624	CDS1	CDP-diacylglycerol synthase (phosphatidate cytidylyltransferase) 1 [Source:HGNC Symbol;Acc:HGNC:1800]	2.02088	2.90632e-25		ENSMUSG00000029330	Cds1	CDP-diacylglycerol synthase 1 [Source:MGI Symbol;Acc:MGI:1921846]	1.34281	0.00123064	1.60766	1.01661e-09	1.69825	3.09606e-17
ENSG00000117676	RPS6KA1	ribosomal protein S6 kinase, 90kDa, polypeptide 1 [Source:HGNC Symbol;Acc:HGNC:10430]	2.02058	1.10379e-16		ENSMUSG00000003644	Rps6ka1	ribosomal protein S6 kinase polypeptide 1 [Source:MGI Symbol;Acc:MGI:104558]	0.917482	0.690257	0.637893	0.000226423	1.2227	0.0094967
ENSG00000168389	MFSD2A	major facilitator superfamily domain containing 2A [Source:HGNC Symbol;Acc:HGNC:25897]	2.01955	2.70229e-05		ENSMUSG00000028655	Mfsd2a	major facilitator superfamily domain containing 2A [Source:MGI Symbol;Acc:MGI:1923824]	1.17506	0.748018	0.970716	0.789498	1.9183	4.55127e-07
ENSG00000162775	RBM15	RNA binding motif protein 15 [Source:HGNC Symbol;Acc:HGNC:14959]	2.0189	2.82216e-05		ENSMUSG00000048109	Rbm15	RNA binding motif protein 15 [Source:MGI Symbol;Acc:MGI:2443205]	4.39733	5.30595e-44	2.1076	5.66902e-45	2.09252	1.29346e-19
ENSG00000185338	SOCS1	suppressor of cytokine signaling 1 [Source:HGNC Symbol;Acc:HGNC:19383]	2.01621	0.0157404		ENSMUSG00000038037	Socs1	suppressor of cytokine signaling 1 [Source:MGI Symbol;Acc:MGI:1354910]	0.553478	0.00774954	0.827552	0.701466	0.864709	0.602525
ENSG00000106105	GARS	glycyl-tRNA synthetase [Source:HGNC Symbol;Acc:HGNC:4162]	2.01541	1.63353e-10		ENSMUSG00000029777	Gars	glycyl-tRNA synthetase [Source:MGI Symbol;Acc:MGI:2449057]	1.16262	0.042668	1.54206	3.87949e-19	1.36362	9.53763e-14
ENSG00000141580	WDR45B	WD repeat domain 45B [Source:HGNC Symbol;Acc:HGNC:25072]	2.01481	3.75989e-10		ENSMUSG00000025173	Wdr45b	WD repeat domain 45B [Source:MGI Symbol;Acc:MGI:1914090]	2.40748	7.8242e-39	1.80927	1.28903e-17	1.76392	2.18865e-26
ENSG00000174373	RALGAPA1	Ral GTPase activating protein, alpha subunit 1 (catalytic) [Source:HGNC Symbol;Acc:HGNC:17770]	2.01473	8.7477e-10		ENSMUSG00000021027	Ralgapa1	Ral GTPase activating protein, alpha subunit 1 [Source:MGI Symbol;Acc:MGI:1931050]	1.90256	9.42007e-13	2.72729	2.87367e-93	1.41172	1.60962e-10
ENSG00000095380	NANS	N-acetylneuraminic acid synthase [Source:HGNC Symbol;Acc:HGNC:19237]	2.01394	2.36205e-08		ENSMUSG00000028334	Nans	N-acetylneuraminic acid synthase (sialic acid synthase) [Source:MGI Symbol;Acc:MGI:2149820]	1.49573	4.11869e-07	1.15039	0.0470695	1.28615	1.62003e-05
ENSG00000164758	MED30	mediator complex subunit 30 [Source:HGNC Symbol;Acc:HGNC:23032]	2.01264	9.22712e-10		ENSMUSG00000038622	Med30	mediator complex subunit 30 [Source:MGI Symbol;Acc:MGI:1917040]	0.964971	0.838202	0.763902	0.00517011	0.716432	0.00105764
ENSG00000112658	SRF	serum response factor (c-fos serum response element-binding transcription factor) [Source:HGNC Symbol;Acc:HGNC:11291]	2.01043	1.69753e-08		ENSMUSG00000015605	Srf	serum response factor [Source:MGI Symbol;Acc:MGI:106658]	4.00992	3.70626e-36	4.39732	5.53167e-102	1.83073	4.90979e-21
ENSG00000116514	RNF19B	ring finger protein 19B [Source:HGNC Symbol;Acc:HGNC:26886]	2.01022	2.35079e-10		ENSMUSG00000028793	Rnf19b	ring finger protein 19B [Source:MGI Symbol;Acc:MGI:1922484]	1.96564	1.25435e-09	1.4754	5.01222e-13	1.52761	9.33242e-18
ENSG00000112312	GMNN	geminin, DNA replication inhibitor [Source:HGNC Symbol;Acc:HGNC:17493]	2.0101	1.6935e-11		ENSMUSG00000006715	Gmnn	geminin [Source:MGI Symbol;Acc:MGI:1927344]	1.48796	0.0910437	0.919805	0.693395	0.826902	0.278002
ENSG00000166068	SPRED1	sprouty-related, EVH1 domain containing 1 [Source:HGNC Symbol;Acc:HGNC:20249]	2.00951	1.12087e-07		ENSMUSG00000027351	Spred1	sprouty protein with EVH-1 domain 1, related sequence [Source:MGI Symbol;Acc:MGI:2150016]	1.34859	0.000223434	1.44605	1.20099e-13	1.35193	1.07606e-09
ENSG00000166451	CENPN	centromere protein N [Source:HGNC Symbol;Acc:HGNC:30873]	2.00803	1.05866e-06		ENSMUSG00000031756	Cenpn	centromere protein N [Source:MGI Symbol;Acc:MGI:1919405]	1.22297	0.607674	0.855122	0.291897	0.790287	0.167472
ENSG00000163932	PRKCD	protein kinase C, delta [Source:HGNC Symbol;Acc:HGNC:9399]	2.00525	1.01609e-07		ENSMUSG00000021948	Prkcd	protein kinase C, delta [Source:MGI Symbol;Acc:MGI:97598]	0.936165	0.957073	1.05465	0.718001	1.52258	1.00885e-11
ENSG00000070444	MNT	MAX network transcriptional repressor [Source:HGNC Symbol;Acc:HGNC:7188]	2.00474	1.01467e-07		ENSMUSG00000000282	Mnt	max binding protein [Source:MGI Symbol;Acc:MGI:109150]	0.827674	0.039424	1.25481	0.000862339	1.40695	9.76956e-11
ENSG00000134107	BHLHE40	basic helix-loop-helix family, member e40 [Source:HGNC Symbol;Acc:HGNC:1046]	2.00198	1.12477e-07		ENSMUSG00000030103	Bhlhe40	basic helix-loop-helix family, member e40 [Source:MGI Symbol;Acc:MGI:1097714]	1.84492	2.15498e-08	1.22616	0.342949	1.71404	1.43875e-18
ENSG00000197381	ADARB1	adenosine deaminase, RNA-specific, B1 [Source:HGNC Symbol;Acc:HGNC:226]	2.00151	1.38208e-19		ENSMUSG00000020262	Adarb1	adenosine deaminase, RNA-specific, B1 [Source:MGI Symbol;Acc:MGI:891999]	1.00727	0.990949	1.20404	0.00105107	1.14331	0.0478569
ENSG00000137713	PPP2R1B	protein phosphatase 2, regulatory subunit A, beta [Source:HGNC Symbol;Acc:HGNC:9303]	2.00118	3.02837e-07		ENSMUSG00000032058	Ppp2r1b	protein phosphatase 2, regulatory subunit A, beta [Source:MGI Symbol;Acc:MGI:1920949]	2.23552	2.93882e-38	1.50568	2.00541e-11	1.26379	9.72078e-05
ENSG00000155252	PI4K2A	phosphatidylinositol 4-kinase type 2 alpha [Source:HGNC Symbol;Acc:HGNC:30031]	2.00046	3.83424e-06		ENSMUSG00000025178	Pi4k2a	phosphatidylinositol 4-kinase type 2 alpha [Source:MGI Symbol;Acc:MGI:1934031]	1.36406	3.29689e-05	1.2638	0.000170497	1.81779	2.77716e-33
ENSG00000068028	RASSF1	Ras association (RalGDS/AF-6) domain family member 1 [Source:HGNC Symbol;Acc:HGNC:9882]	1.99964	8.55575e-08		ENSMUSG00000010067	Rassf1	Ras association (RalGDS/AF-6) domain family member 1 [Source:MGI Symbol;Acc:MGI:1928386]	3.15529	4.49379e-30	1.59872	2.18413e-07	1.86039	1.69941e-12
ENSG00000106236	NPTX2	neuronal pentraxin II [Source:HGNC Symbol;Acc:HGNC:7953]	1.99878	1.63982e-07		ENSMUSG00000059991	Nptx2	neuronal pentraxin 2 [Source:MGI Symbol;Acc:MGI:1858209]	10.4935	9.10433e-18	13.5701	2.07141e-38	17.485	2.73267e-72
ENSG00000084070	SMAP2	small ArfGAP2 [Source:HGNC Symbol;Acc:HGNC:25082]	1.99682	3.21495e-10		ENSMUSG00000032870	Smap2	small ArfGAP 2 [Source:MGI Symbol;Acc:MGI:1917030]	1.12698	0.254264	0.955572	0.61511	1.02801	0.695387
ENSG00000196850	PPTC7	PTC7 protein phosphatase homolog [Source:HGNC Symbol;Acc:HGNC:30695]	1.99658	3.41784e-11		ENSMUSG00000038582	Pptc7	PTC7 protein phosphatase homolog (S. cerevisiae) [Source:MGI Symbol;Acc:MGI:2444593]	0.716212	0.00157044	0.858284	0.0583779	1.72175	3.77378e-15
ENSG00000199179	MIRLET7I	microRNA let-7i [Source:HGNC Symbol;Acc:HGNC:31486]	1.99412	0.536604		ENSMUSG00000065406	Mirlet7i	microRNA let7i [Source:MGI Symbol;Acc:MGI:2676802]	1.66843	0.390332	2.13449	0.363284	0.711421
ENSG00000113739	STC2	stanniocalcin 2 [Source:HGNC Symbol;Acc:HGNC:11374]	1.99371	0.0285835		ENSMUSG00000020303	Stc2	stanniocalcin 2 [Source:MGI Symbol;Acc:MGI:1316731]	3.86377	2.17757e-20	4.94811	8.24712e-68	3.12268	1.69434e-06
ENSG00000069966	GNB5	guanine nucleotide binding protein (G protein), beta 5 [Source:HGNC Symbol;Acc:HGNC:4401]	1.99306	2.45764e-11		ENSMUSG00000032192	Gnb5	guanine nucleotide binding protein (G protein), beta 5 [Source:MGI Symbol;Acc:MGI:101848]	0.904626	0.490293	0.940682	0.542128	1.19136	0.00786362
ENSG00000177189	RPS6KA3	ribosomal protein S6 kinase, 90kDa, polypeptide 3 [Source:HGNC Symbol;Acc:HGNC:10432]	1.99278	1.97125e-06		ENSMUSG00000031309	Rps6ka3	ribosomal protein S6 kinase polypeptide 3 [Source:MGI Symbol;Acc:MGI:104557]	1.1391	0.118105	1.15709	0.0537388	1.42719	4.13381e-12
ENSG00000156875	HIAT1	hippocampus abundant transcript 1 [Source:HGNC Symbol;Acc:HGNC:23363]	1.99124	1.36117e-19		ENSMUSG00000089911	Hiat1	hippocampus abundant gene transcript 1 [Source:MGI Symbol;Acc:MGI:1201609]	2.09941	1.04614e-18	2.69129	5.36557e-66	1.83808	5.06006e-29
ENSG00000077150	NFKB2	nuclear factor of kappa light polypeptide gene enhancer in B-cells 2 (p49/p100) [Source:HGNC Symbol;Acc:HGNC:7795]	1.98882	2.60016e-06		ENSMUSG00000025225	Nfkb2	nuclear factor of kappa light polypeptide gene enhancer in B cells 2, p49/p100 [Source:MGI Symbol;Acc:MGI:1099800]	2.96746	4.35371e-14	2.05998	4.56504e-08	1.77582	1.01234e-11
ENSG00000172115	CYCS	cytochrome c, somatic [Source:HGNC Symbol;Acc:HGNC:19986]	1.98857	4.36139e-30		ENSMUSG00000063694	Cycs	cytochrome c, somatic [Source:MGI Symbol;Acc:MGI:88578]	1.1326	0.179381	1.11524	0.13345	1.20239	0.00485555
ENSG00000141582	CBX4	chromobox homolog 4 [Source:HGNC Symbol;Acc:HGNC:1554]	1.98813	2.92982e-06		ENSMUSG00000039989	Cbx4	chromobox 4 [Source:MGI Symbol;Acc:MGI:1195985]	2.36019	2.80126e-17	2.75375	2.15752e-35	2.20004	5.99203e-34
ENSG00000104904	OAZ1	ornithine decarboxylase antizyme 1 [Source:HGNC Symbol;Acc:HGNC:8095]	1.98801	2.41645e-12		ENSMUSG00000035242	Oaz1	ornithine decarboxylase antizyme 1 [Source:MGI Symbol;Acc:MGI:109433]	1.95244	2.49677e-20	2.09036	4.14429e-37	1.95811	2.51373e-43
ENSG00000138119	MYOF	myoferlin [Source:HGNC Symbol;Acc:HGNC:3656]	1.98683	0.0012469		ENSMUSG00000048612	Myof	myoferlin [Source:MGI Symbol;Acc:MGI:1919192]	1.42055	0.0676531	1.80718	1.90181e-10	1.56275	2.65745e-12
ENSG00000114120	SLC25A36	solute carrier family 25 (pyrimidine nucleotide carrier), member 36 [Source:HGNC Symbol;Acc:HGNC:25554]	1.98614	1.19004e-07		ENSMUSG00000032449	Slc25a36	solute carrier family 25, member 36 [Source:MGI Symbol;Acc:MGI:1924909]	1.60539	9.06845e-15	1.42804	5.33598e-12	1.4478	1.89681e-13
ENSG00000244687	UBE2V1	ubiquitin-conjugating enzyme E2 variant 1 [Source:HGNC Symbol;Acc:HGNC:12494]	1.98467	2.56169e-06		ENSMUSG00000078923	Ube2v1	ubiquitin-conjugating enzyme E2 variant 1 [Source:MGI Symbol;Acc:MGI:1913839]	1.45551	0.0527872	1.81756	0.0441087	1.69868	0.0440434
ENSG00000145730	PAM	peptidylglycine alpha-amidating monooxygenase [Source:HGNC Symbol;Acc:HGNC:8596]	1.98376	2.79789e-09		ENSMUSG00000026335	Pam	peptidylglycine alpha-amidating monooxygenase [Source:MGI Symbol;Acc:MGI:97475]	1.99305	4.05903e-19	3.7831	3.82329e-125	2.44225	2.79412e-12
ENSG00000162231	NXF1	nuclear RNA export factor 1 [Source:HGNC Symbol;Acc:HGNC:8071]	1.98368	1.9496e-05		ENSMUSG00000010097	Nxf1	nuclear RNA export factor 1 [Source:MGI Symbol;Acc:MGI:1858330]	1.28094	0.000679023	1.32574	8.61526e-08	1.44756	2.94747e-14
ENSG00000167508	MVD	mevalonate (diphospho) decarboxylase [Source:HGNC Symbol;Acc:HGNC:7529]	1.98344	1.77372e-19		ENSMUSG00000006517	Mvd	mevalonate (diphospho) decarboxylase [Source:MGI Symbol;Acc:MGI:2179327]	0.676418	0.0378275	0.629768	6.53412e-14	1.14967	0.0238943
ENSG00000123091	RNF11	ring finger protein 11 [Source:HGNC Symbol;Acc:HGNC:10056]	1.98172	3.38847e-14		ENSMUSG00000028557	Rnf11	ring finger protein 11 [Source:MGI Symbol;Acc:MGI:1352759]	1.33279	0.000372054	1.42558	1.75816e-10	1.51057	2.03964e-21
ENSG00000111605	CPSF6	cleavage and polyadenylation specific factor 6, 68kDa [Source:HGNC Symbol;Acc:HGNC:13871]	1.98154	7.74193e-06		ENSMUSG00000055531	Cpsf6	cleavage and polyadenylation specific factor 6 [Source:MGI Symbol;Acc:MGI:1913948]	1.43928	2.51949e-05	1.38573	8.4774e-12	1.44924	2.20274e-15
ENSG00000110395	CBL	Cbl proto-oncogene, E3 ubiquitin protein ligase [Source:HGNC Symbol;Acc:HGNC:1541]	1.97896	2.04947e-06		ENSMUSG00000034342	Cbl	Casitas B-lineage lymphoma [Source:MGI Symbol;Acc:MGI:88279]	1.08939	0.765881	0.987749	0.912664	1.10506	0.381519
ENSG00000172175	MALT1	MALT1 paracaspase [Source:HGNC Symbol;Acc:HGNC:6819]	1.97775	4.3717e-13		ENSMUSG00000032688	Malt1	mucosa associated lymphoid tissue lymphoma translocation gene 1 [Source:MGI Symbol;Acc:MGI:2445027]	1.79726	0.00291928	1.3535	0.0100924	0.870292	0.45076
ENSG00000132613	MTSS1L	metastasis suppressor 1-like [Source:HGNC Symbol;Acc:HGNC:25094]	1.97681	1.12598e-16		ENSMUSG00000033763	Mtss1l	metastasis suppressor 1-like [Source:MGI Symbol;Acc:MGI:3039591]	1.04879	0.630906	1.23501	0.000152848	1.34523	5.45978e-13
ENSG00000138434	SSFA2	sperm specific antigen 2 [Source:HGNC Symbol;Acc:HGNC:11319]	1.97558	4.91577e-14		ENSMUSG00000027007	Ssfa2	sperm specific antigen 2 [Source:MGI Symbol;Acc:MGI:1917849]	2.17657	1.38768e-10	2.02141	4.91713e-32	2.12487	5.17406e-46
ENSG00000122591	FAM126A	family with sequence similarity 126, member A [Source:HGNC Symbol;Acc:HGNC:24587]	1.9747	2.33234e-07		ENSMUSG00000028995	Fam126a	family with sequence similarity 126, member A [Source:MGI Symbol;Acc:MGI:2149839]	1.24506	0.0161728	0.924484	0.239893	1.15614	0.011782
ENSG00000175727	MLXIP	MLX interacting protein [Source:HGNC Symbol;Acc:HGNC:17055]	1.97444	3.52691e-07		ENSMUSG00000038342	Mlxip	MLX interacting protein [Source:MGI Symbol;Acc:MGI:2141183]	1.80373	5.21176e-09	1.57238	8.61095e-11	1.53812	2.90122e-16
ENSG00000047365	ARAP2	ArfGAP with RhoGAP domain, ankyrin repeat and PH domain 2 [Source:HGNC Symbol;Acc:HGNC:16924]	1.97404	0.0727485		ENSMUSG00000037999	Arap2	ArfGAP with RhoGAP domain, ankyrin repeat and PH domain 2 [Source:MGI Symbol;Acc:MGI:2684416]	1.05905	0.722795	1.05145	0.487481	1.21623	0.0042511
ENSG00000153071	DAB2	Dab, mitogen-responsive phosphoprotein, homolog 2 (Drosophila) [Source:HGNC Symbol;Acc:HGNC:2662]	1.97219	1.06098e-05		ENSMUSG00000022150	Dab2	disabled 2, mitogen-responsive phosphoprotein [Source:MGI Symbol;Acc:MGI:109175]	1.68144	0.000197602	1.45406	7.21889e-05	1.1155	0.0654395
ENSG00000019995	ZRANB1	zinc finger, RAN-binding domain containing 1 [Source:HGNC Symbol;Acc:HGNC:18224]	1.96821	2.40068e-09		ENSMUSG00000030967	Zranb1	zinc finger, RAN-binding domain containing 1 [Source:MGI Symbol;Acc:MGI:106441]	1.87295	7.94966e-18	1.54474	7.03756e-13	1.59158	1.00592e-20
ENSG00000272533	SNORA28	small nucleolar RNA, H/ACA box 28 [Source:HGNC Symbol;Acc:HGNC:32618]	1.96804			ENSMUSG00000064493	Snora28	small nucleolar RNA, H/ACA box 28 [Source:MGI Symbol;Acc:MGI:3819496]	1.40233	0.249675	2.29813	1.12557e-06	1.62773	0.0691325
ENSG00000151689	INPP1	inositol polyphosphate-1-phosphatase [Source:HGNC Symbol;Acc:HGNC:6071]	1.96775	2.94327e-09		ENSMUSG00000026102	Inpp1	inositol polyphosphate-1-phosphatase [Source:MGI Symbol;Acc:MGI:104848]	0.655061	1.09192e-07	0.576459	9.07824e-12	0.92387	0.422697
ENSG00000165650	PDZD8	PDZ domain containing 8 [Source:HGNC Symbol;Acc:HGNC:26974]	1.96692	6.4309e-11		ENSMUSG00000074746	Pdzd8	PDZ domain containing 8 [Source:MGI Symbol;Acc:MGI:2677270]	1.68211	0.000311756	1.66	1.84588e-22	1.18328	0.00399866
ENSG00000165886	UBTD1	ubiquitin domain containing 1 [Source:HGNC Symbol;Acc:HGNC:25683]	1.96213	4.45297e-08		ENSMUSG00000025171	Ubtd1	ubiquitin domain containing 1 [Source:MGI Symbol;Acc:MGI:2385092]	1.21649	0.13615	1.11227	0.44698	1.76616	3.53103e-12
ENSG00000154217	PITPNC1	phosphatidylinositol transfer protein, cytoplasmic 1 [Source:HGNC Symbol;Acc:HGNC:21045]	1.96208	1.06699e-13		ENSMUSG00000040430	Pitpnc1	phosphatidylinositol transfer protein, cytoplasmic 1 [Source:MGI Symbol;Acc:MGI:1919045]	0.987776	0.941919	1.39574	8.64762e-08	1.3297	2.51781e-07
ENSG00000125834	STK35	serine/threonine kinase 35 [Source:HGNC Symbol;Acc:HGNC:16254]	1.96182	5.43129e-07		ENSMUSG00000037885	Stk35	serine/threonine kinase 35 [Source:MGI Symbol;Acc:MGI:1914583]	0.928496	0.680408	1.04622	0.659544	1.09728	0.248361
ENSG00000204386	NEU1	sialidase 1 (lysosomal sialidase) [Source:HGNC Symbol;Acc:HGNC:7758]	1.96031	2.13839e-12		ENSMUSG00000007038	Neu1	neuraminidase 1 [Source:MGI Symbol;Acc:MGI:97305]	0.757553	0.0232088	1.06507	0.488357	1.5463	1.69445e-11
ENSG00000135541	AHI1	Abelson helper integration site 1 [Source:HGNC Symbol;Acc:HGNC:21575]	1.95916	2.65206e-15		ENSMUSG00000019986	Ahi1	Abelson helper integration site 1 [Source:MGI Symbol;Acc:MGI:87971]	1.06229	0.577684	1.35525	3.50603e-09	1.14472	0.00135174
ENSG00000178234	GALNT11	polypeptide N-acetylgalactosaminyltransferase 11 [Source:HGNC Symbol;Acc:HGNC:19875]	1.95824	4.51682e-11		ENSMUSG00000038072	Galnt11	UDP-N-acetyl-alpha-D-galactosamine:polypeptide N-acetylgalactosaminyltransferase 11 [Source:MGI Symbol;Acc:MGI:2444392]	1.27277	0.0464689	2.25074	7.22695e-41	1.52637	1.30269e-12
ENSG00000100221	JOSD1	Josephin domain containing 1 [Source:HGNC Symbol;Acc:HGNC:28953]	1.95798	5.05124e-13		ENSMUSG00000022426	Josd1	Josephin domain containing 1 [Source:MGI Symbol;Acc:MGI:1921408]	2.14992	3.20245e-38	2.25322	5.79792e-27	2.74558	3.61211e-64
ENSG00000073792	IGF2BP2	insulin-like growth factor 2 mRNA binding protein 2 [Source:HGNC Symbol;Acc:HGNC:28867]	1.95784	2.01783e-12		ENSMUSG00000033581	Igf2bp2	insulin-like growth factor 2 mRNA binding protein 2 [Source:MGI Symbol;Acc:MGI:1890358]	2.18669	1.90785e-12	2.25598	1.41253e-23	1.76236	2.11052e-21
ENSG00000184675	AMER1	APC membrane recruitment protein 1 [Source:HGNC Symbol;Acc:HGNC:26837]	1.9572	7.20893e-06		ENSMUSG00000050332	Amer1	APC membrane recruitment 1 [Source:MGI Symbol;Acc:MGI:1919595]	0.701422	0.000717174	0.854287	0.0118794	0.879758	0.0450926
ENSG00000108256	NUFIP2	nuclear fragile X mental retardation protein interacting protein 2 [Source:HGNC Symbol;Acc:HGNC:17634]	1.95674	1.62142e-05		ENSMUSG00000037857	Nufip2	nuclear fragile X mental retardation protein interacting protein 2 [Source:MGI Symbol;Acc:MGI:1915814]	2.98043	6.16502e-16	2.01325	3.17906e-21	1.61784	1.0061e-17
ENSG00000104885	DOT1L	DOT1-like histone H3K79 methyltransferase [Source:HGNC Symbol;Acc:HGNC:24948]	1.95577	1.3642e-11		ENSMUSG00000061589	Dot1l	DOT1-like, histone H3 methyltransferase (S. cerevisiae) [Source:MGI Symbol;Acc:MGI:2143886]	2.27954	3.86694e-18	2.9054	3.51431e-86	2.76661	2.62354e-73
ENSG00000128294	TPST2	tyrosylprotein sulfotransferase 2 [Source:HGNC Symbol;Acc:HGNC:12021]	1.95485	2.5685e-10		ENSMUSG00000029344	Tpst2	protein-tyrosine sulfotransferase 2 [Source:MGI Symbol;Acc:MGI:1309516]	1.41482	0.000110285	1.1186	0.337703	1.47618	1.58806e-06
ENSG00000120137	PANK3	pantothenate kinase 3 [Source:HGNC Symbol;Acc:HGNC:19365]	1.95457	5.74679e-11		ENSMUSG00000018846	Pank3	pantothenate kinase 3 [Source:MGI Symbol;Acc:MGI:2387464]	0.837834	0.203056	1.15636	0.0104192	1.24836	1.18309e-05
ENSG00000078804	TP53INP2	tumor protein p53 inducible nuclear protein 2 [Source:HGNC Symbol;Acc:HGNC:16104]	1.95424	1.40641e-18		ENSMUSG00000038375	Trp53inp2	transformation related protein 53 inducible nuclear protein 2 [Source:MGI Symbol;Acc:MGI:1915978]	1.14292	0.12702	1.51153	1.63018e-11	1.75279	5.28381e-41
ENSG00000198963	RORB	RAR-related orphan receptor B [Source:HGNC Symbol;Acc:HGNC:10259]	1.9537	0.00203439		ENSMUSG00000036192	Rorb	RAR-related orphan receptor beta [Source:MGI Symbol;Acc:MGI:1343464]	1.90155	1.35942e-08	1.51335	3.34213e-08	3.21255	3.25172e-28
ENSG00000059769	DNAJC25	DnaJ (Hsp40) homolog, subfamily C , member 25 [Source:HGNC Symbol;Acc:HGNC:34187]	1.95362	3.50392e-05		ENSMUSG00000070972	Dnajc25	DnaJ (Hsp40) homolog, subfamily C, member 25 [Source:MGI Symbol;Acc:MGI:1919679]	1.47836	0.000150296	1.62501	1.78389e-05	1.35782	0.0006458
ENSG00000059728	MXD1	MAX dimerization protein 1 [Source:HGNC Symbol;Acc:HGNC:6761]	1.95269	2.65795e-05		ENSMUSG00000001156	Mxd1	MAX dimerization protein 1 [Source:MGI Symbol;Acc:MGI:96908]	1.6241	0.00044385	1.20417	0.0792634	1.12584	0.174671
ENSG00000139496	NUPL1	nucleoporin like 1 [Source:HGNC Symbol;Acc:HGNC:20261]	1.95253	1.67698e-11		ENSMUSG00000063895	Nupl1	nucleoporin like 1 [Source:MGI Symbol;Acc:MGI:1919094]	0.824269	0.0673183	0.969902	0.711089	1.01933	0.858924
ENSG00000156642	NPTN	neuroplastin [Source:HGNC Symbol;Acc:HGNC:17867]	1.95121	2.5132e-13		ENSMUSG00000032336	Nptn	neuroplastin [Source:MGI Symbol;Acc:MGI:108077]	1.23813	0.014771	1.34268	2.22803e-07	1.33592	2.14448e-10
ENSG00000100142	POLR2F	polymerase (RNA) II (DNA directed) polypeptide F [Source:HGNC Symbol;Acc:HGNC:9193]	1.95058	0.0432274		ENSMUSG00000033020	Polr2f	polymerase (RNA) II (DNA directed) polypeptide F [Source:MGI Symbol;Acc:MGI:1349393]	1.07062	0.747735	0.943487	0.546831	1.14223	0.113731
ENSG00000107372	ZFAND5	zinc finger, AN1-type domain 5 [Source:HGNC Symbol;Acc:HGNC:13008]	1.94996	1.13011e-09		ENSMUSG00000024750	Zfand5	zinc finger, AN1-type domain 5 [Source:MGI Symbol;Acc:MGI:1278334]	1.75845	4.82205e-26	1.81263	5.95176e-31	1.62706	1.99873e-19
ENSG00000115525	ST3GAL5	ST3 beta-galactoside alpha-2,3-sialyltransferase 5 [Source:HGNC Symbol;Acc:HGNC:10872]	1.94909	8.18918e-19		ENSMUSG00000056091	St3gal5	ST3 beta-galactoside alpha-2,3-sialyltransferase 5 [Source:MGI Symbol;Acc:MGI:1339963]	0.919367	0.698338	0.694725	5.20927e-06	0.976491	0.777862
ENSG00000166197	NOLC1	nucleolar and coiled-body phosphoprotein 1 [Source:HGNC Symbol;Acc:HGNC:15608]	1.94843	8.72092e-10		ENSMUSG00000015176	Nolc1	nucleolar and coiled-body phosphoprotein 1 [Source:MGI Symbol;Acc:MGI:1918019]	2.70937	2.71963e-43	1.19579	0.00184415	1.2713	0.00010743
ENSG00000096654	ZNF184	zinc finger protein 184 [Source:HGNC Symbol;Acc:HGNC:12975]	1.94827	3.33916e-05		ENSMUSG00000006720	Zfp184	zinc finger protein 184 (Kruppel-like) [Source:MGI Symbol;Acc:MGI:1922244]	19.1758	7.37849e-128	4.97985	1.53434e-92	3.82628	1.68023e-12
ENSG00000122042	UBL3	ubiquitin-like 3 [Source:HGNC Symbol;Acc:HGNC:12504]	1.94748	2.38529e-08		ENSMUSG00000001687	Ubl3	ubiquitin-like 3 [Source:MGI Symbol;Acc:MGI:1344373]	1.87244	1.68128e-09	2.33366	3.21324e-49	1.72906	4.13942e-20
ENSG00000132639	SNAP25	synaptosomal-associated protein, 25kDa [Source:HGNC Symbol;Acc:HGNC:11132]	1.947	2.855e-19		ENSMUSG00000027273	Snap25	synaptosomal-associated protein 25 [Source:MGI Symbol;Acc:MGI:98331]	1.39788	0.00279241	2.48758	7.86458e-63	1.66884	4.63351e-05
ENSG00000158201	ABHD3	abhydrolase domain containing 3 [Source:HGNC Symbol;Acc:HGNC:18718]	1.94678	3.58164e-13		ENSMUSG00000002475	Abhd3	abhydrolase domain containing 3 [Source:MGI Symbol;Acc:MGI:2147183]	1.23457	0.439346	0.974899	0.918957	0.940768	0.631801
ENSG00000103187	COTL1	coactosin-like F-actin binding protein 1 [Source:HGNC Symbol;Acc:HGNC:18304]	1.94516	7.21536e-11		ENSMUSG00000031827	Cotl1	coactosin-like 1 (Dictyostelium) [Source:MGI Symbol;Acc:MGI:1919292]	1.26138	0.00367174	1.03501	0.665385	1.17924	0.000597315
ENSG00000131016	AKAP12	A kinase (PRKA) anchor protein 12 [Source:HGNC Symbol;Acc:HGNC:370]	1.94446	4.47853e-12		ENSMUSG00000038587	Akap12	A kinase (PRKA) anchor protein (gravin) 12 [Source:MGI Symbol;Acc:MGI:1932576]	1.27378	0.167133	1.07114	0.256216	1.27183	1.07936e-06
ENSG00000165349	SLC7A3	solute carrier family 7 (cationic amino acid transporter, y+ system), member 3 [Source:HGNC Symbol;Acc:HGNC:11061]	1.94362	0.000531318		ENSMUSG00000031297	Slc7a3	solute carrier family 7 (cationic amino acid transporter, y+ system), member 3 [Source:MGI Symbol;Acc:MGI:1100521]	2.0247	2.86529e-20	4.27882	4.00638e-58	2.78612	1.08204e-45
ENSG00000165186	PTCHD1	patched domain containing 1 [Source:HGNC Symbol;Acc:HGNC:26392]	1.94273	5.34476e-08		ENSMUSG00000041552	Ptchd1	patched domain containing 1 [Source:MGI Symbol;Acc:MGI:2685233]	1.80614	2.36694e-07	2.38403	7.11582e-31	1.03636	0.844579
ENSG00000187446	CHP1	calcineurin-like EF-hand protein 1 [Source:HGNC Symbol;Acc:HGNC:17433]	1.94235	3.9312e-08		ENSMUSG00000014077	Chp1	calcineurin-like EF hand protein 1 [Source:MGI Symbol;Acc:MGI:1927185]	1.93756	7.27234e-13	1.73077	7.86152e-24	1.89782	2.69444e-36
ENSG00000018408	WWTR1	WW domain containing transcription regulator 1 [Source:HGNC Symbol;Acc:HGNC:24042]	1.94094	0.00028473		ENSMUSG00000027803	Wwtr1	WW domain containing transcription regulator 1 [Source:MGI Symbol;Acc:MGI:1917649]	3.26035	7.08522e-31	1.7807	8.63289e-23	2.28278	2.00121e-71
ENSG00000116954	RRAGC	Ras-related GTP binding C [Source:HGNC Symbol;Acc:HGNC:19902]	1.94052	8.22796e-10		ENSMUSG00000028646	Rragc	Ras-related GTP binding C [Source:MGI Symbol;Acc:MGI:1858751]	1.2266	0.04472	1.24938	0.00192379	1.78552	2.26499e-30
ENSG00000075415	SLC25A3	solute carrier family 25 (mitochondrial carrier; phosphate carrier), member 3 [Source:HGNC Symbol;Acc:HGNC:10989]	1.93982	8.49372e-15		ENSMUSG00000061904	Slc25a3	solute carrier family 25 (mitochondrial carrier, phosphate carrier), member 3 [Source:MGI Symbol;Acc:MGI:1353498]	2.37068	2.41841e-27	3.75489	1.62061e-127	2.2068	5.45738e-60
ENSG00000091542	ALKBH5	alkB homolog 5, RNA demethylase [Source:HGNC Symbol;Acc:HGNC:25996]	1.93652	2.04842e-08		ENSMUSG00000042650	Alkbh5	alkB, alkylation repair homolog 5 (E. coli) [Source:MGI Symbol;Acc:MGI:2144489]	2.43267	8.60867e-16	1.90664	4.09529e-29	1.63884	2.1482e-22
ENSG00000183779	ZNF703	zinc finger protein 703 [Source:HGNC Symbol;Acc:HGNC:25883]	1.93602	0.232265		ENSMUSG00000085795	Zfp703	zinc finger protein 703 [Source:MGI Symbol;Acc:MGI:2662729]	1.47609	0.000976237	1.36131	0.0490817	1.2491	0.000279984
ENSG00000114125	RNF7	ring finger protein 7 [Source:HGNC Symbol;Acc:HGNC:10070]	1.9354	3.04269e-20		ENSMUSG00000051234	Rnf7	ring finger protein 7 [Source:MGI Symbol;Acc:MGI:1337096]	0.945413	0.65892	0.870763	0.0389812	1.06898	0.292948
ENSG00000099804	CDC34	cell division cycle 34 [Source:HGNC Symbol;Acc:HGNC:1734]	1.93416	2.03872e-08		ENSMUSG00000020307	Cdc34	cell division cycle 34 [Source:MGI Symbol;Acc:MGI:102657]	0.815899	0.171774	0.92823	0.444921	1.19309	0.00432113
ENSG00000267195	MIR212	microRNA 212 [Source:HGNC Symbol;Acc:HGNC:31589]	1.93239			ENSMUSG00000065590	Mir212	microRNA 212 [Source:MGI Symbol;Acc:MGI:2676888]	7.10562	7.35442e-15	45.1195	0.000485696	25.7505	1.29613e-11
ENSG00000169902	TPST1	tyrosylprotein sulfotransferase 1 [Source:HGNC Symbol;Acc:HGNC:12020]	1.92699	1.98879e-06		ENSMUSG00000034118	Tpst1	protein-tyrosine sulfotransferase 1 [Source:MGI Symbol;Acc:MGI:1298231]	0.734801	0.000113584	0.617928	1.01558e-11	0.778946	7.64819e-05
ENSG00000168374	ARF4	ADP-ribosylation factor 4 [Source:HGNC Symbol;Acc:HGNC:655]	1.92666	7.4011e-05		ENSMUSG00000021877	Arf4	ADP-ribosylation factor 4 [Source:MGI Symbol;Acc:MGI:99433]	2.99038	3.20383e-41	2.73008	1.41364e-97	2.01271	2.83398e-39
ENSG00000131389	SLC6A6	solute carrier family 6 (neurotransmitter transporter), member 6 [Source:HGNC Symbol;Acc:HGNC:11052]	1.9262	2.9581e-10		ENSMUSG00000030096	Slc6a6	solute carrier family 6 (neurotransmitter transporter, taurine), member 6 [Source:MGI Symbol;Acc:MGI:98488]	1.07427	0.61829	1.49117	3.08336e-17	1.51021	1.65374e-23
ENSG00000168003	SLC3A2	solute carrier family 3 (amino acid transporter heavy chain), member 2 [Source:HGNC Symbol;Acc:HGNC:11026]	1.92535	6.81043e-05		ENSMUSG00000010095	Slc3a2	solute carrier family 3 (activators of dibasic and neutral amino acid transport), member 2 [Source:MGI Symbol;Acc:MGI:96955]	1.91636	3.06923e-15	3.01207	1.16835e-80	1.54834	2.58457e-20
ENSG00000140564	FURIN	furin (paired basic amino acid cleaving enzyme) [Source:HGNC Symbol;Acc:HGNC:8568]	1.92356	1.44545e-07		ENSMUSG00000030530	Furin	furin (paired basic amino acid cleaving enzyme) [Source:MGI Symbol;Acc:MGI:97513]	0.927059	0.503346	0.961205	0.730088	1.39775	2.78485e-10
ENSG00000157933	SKI	SKI proto-oncogene [Source:HGNC Symbol;Acc:HGNC:10896]	1.9217	1.3628e-06		ENSMUSG00000029050	Ski	ski sarcoma viral oncogene homolog (avian) [Source:MGI Symbol;Acc:MGI:98310]	1.19645	0.191943	1.36644	1.74607e-08	1.44526	1.89109e-15
ENSG00000073150	PANX2	pannexin 2 [Source:HGNC Symbol;Acc:HGNC:8600]	1.92013	7.09772e-07		ENSMUSG00000058441	Panx2	pannexin 2 [Source:MGI Symbol;Acc:MGI:1890615]	1.07214	0.693483	0.867011	0.193021	1.16272	0.0637029
ENSG00000198431	TXNRD1	thioredoxin reductase 1 [Source:HGNC Symbol;Acc:HGNC:12437]	1.91993	9.76666e-06		ENSMUSG00000020250	Txnrd1	thioredoxin reductase 1 [Source:MGI Symbol;Acc:MGI:1354175]	1.28773	2.60183e-06	0.848424	0.00148264	1.30135	3.06016e-07
ENSG00000215251	FASTKD5	FAST kinase domains 5 [Source:HGNC Symbol;Acc:HGNC:25790]	1.91944	7.54362e-09		ENSMUSG00000079043	Fastkd5	FAST kinase domains 5 [Source:MGI Symbol;Acc:MGI:2139469]	0.686586	0.0377182	0.716242	0.0125533	1.14877	0.424076
ENSG00000166974	MAPRE2	microtubule-associated protein, RP/EB family, member 2 [Source:HGNC Symbol;Acc:HGNC:6891]	1.91738	3.16913e-08		ENSMUSG00000024277	Mapre2	microtubule-associated protein, RP/EB family, member 2 [Source:MGI Symbol;Acc:MGI:106271]	1.05782	0.583359	1.05497	0.405397	0.94649	0.258971
ENSG00000161638	ITGA5	integrin, alpha 5 (fibronectin receptor, alpha polypeptide) [Source:HGNC Symbol;Acc:HGNC:6141]	1.91693	9.30033e-06		ENSMUSG00000000555	Itga5	integrin alpha 5 (fibronectin receptor alpha) [Source:MGI Symbol;Acc:MGI:96604]	2.38867	1.74848e-10	1.54859	0.000450268	1.66734	1.12554e-16
ENSG00000168081	PNOC	prepronociceptin [Source:HGNC Symbol;Acc:HGNC:9163]	1.91582	3.60389e-11		ENSMUSG00000045731	Pnoc	prepronociceptin [Source:MGI Symbol;Acc:MGI:105308]	1.06984	0.540381	2.13478	6.8183e-15	2.88752	9.93883e-22
ENSG00000175470	PPP2R2D	protein phosphatase 2, regulatory subunit B, delta [Source:HGNC Symbol;Acc:HGNC:23732]	1.91562	5.20484e-11		ENSMUSG00000041769	Ppp2r2d	protein phosphatase 2, regulatory subunit B, delta [Source:MGI Symbol;Acc:MGI:1289252]	1.64915	1.15703e-07	1.53436	3.43844e-11	1.58145	4.17472e-19
ENSG00000004799	PDK4	pyruvate dehydrogenase kinase, isozyme 4 [Source:HGNC Symbol;Acc:HGNC:8812]	1.91432	0.00693		ENSMUSG00000019577	Pdk4	pyruvate dehydrogenase kinase, isoenzyme 4 [Source:MGI Symbol;Acc:MGI:1351481]	4.03802	1.62066e-19	1.6008	0.00110141	1.48231	0.0364649
ENSG00000068878	PSME4	proteasome (prosome, macropain) activator subunit 4 [Source:HGNC Symbol;Acc:HGNC:20635]	1.91299	1.12232e-12		ENSMUSG00000040850	Psme4	proteasome (prosome, macropain) activator subunit 4 [Source:MGI Symbol;Acc:MGI:2143994]	1.76515	1.34339e-15	1.81699	7.74482e-33	1.96966	1.58711e-45
ENSG00000141338	ABCA8	ATP-binding cassette, sub-family A (ABC1), member 8 [Source:HGNC Symbol;Acc:HGNC:38]	1.91293	1.26496e-06		ENSMUSG00000020620	Abca8b	ATP-binding cassette, sub-family A (ABC1), member 8b [Source:MGI Symbol;Acc:MGI:1351668]	1.11375	0.542815	1.12059	0.418885	0.820669	0.00579538
ENSG00000099814	CEP170B	centrosomal protein 170B [Source:HGNC Symbol;Acc:HGNC:20362]	1.91245	2.0165e-11		ENSMUSG00000072825	Cep170b	centrosomal protein 170B [Source:MGI Symbol;Acc:MGI:2145043]	0.905979	0.356844	0.940884	0.35736	1.11713	0.0187303
ENSG00000133639	BTG1	B-cell translocation gene 1, anti-proliferative [Source:HGNC Symbol;Acc:HGNC:1130]	1.91087	7.65538e-07		ENSMUSG00000036478	Btg1	B cell translocation gene 1, anti-proliferative [Source:MGI Symbol;Acc:MGI:88215]	4.16069	6.15309e-35	3.17677	1.65352e-111	1.99837	3.45626e-29
ENSG00000184863	RBM33	RNA binding motif protein 33 [Source:HGNC Symbol;Acc:HGNC:27223]	1.91007	0.000141363		ENSMUSG00000048271	Rbm33	RNA binding motif protein 33 [Source:MGI Symbol;Acc:MGI:1919670]	1.05744	0.549905	1.49759	9.95942e-15	1.60618	4.458e-23
ENSG00000091527	CDV3	CDV3 homolog (mouse) [Source:HGNC Symbol;Acc:HGNC:26928]	1.90984	4.00933e-17		ENSMUSG00000032803	Cdv3	carnitine deficiency-associated gene expressed in ventricle 3 [Source:MGI Symbol;Acc:MGI:2448759]	1.3407	0.000668253	1.44857	2.03794e-08	1.27776	8.67864e-08
ENSG00000101871	MID1	midline 1 [Source:HGNC Symbol;Acc:HGNC:7095]	1.90983	3.64557e-05		ENSMUSG00000035299	Mid1	midline 1 [Source:MGI Symbol;Acc:MGI:1100537]	2.26953	0.0183773	2.75075	4.61251e-18	2.03863	1.79959e-07
ENSG00000158122	AAED1	AhpC/TSA antioxidant enzyme domain containing 1 [Source:HGNC Symbol;Acc:HGNC:16881]	1.90902	1.31533e-06		ENSMUSG00000021482	Aaed1	AhpC/TSA antioxidant enzyme domain containing 1 [Source:MGI Symbol;Acc:MGI:1913379]	1.6318	0.00736659	1.27363	0.165031	1.31335	0.00317706
ENSG00000158470	B4GALT5	UDP-Gal:betaGlcNAc beta 1,4- galactosyltransferase, polypeptide 5 [Source:HGNC Symbol;Acc:HGNC:928]	1.90833	1.03043e-15		ENSMUSG00000017929	B4galt5	UDP-Gal:betaGlcNAc beta 1,4-galactosyltransferase, polypeptide 5 [Source:MGI Symbol;Acc:MGI:1927169]	0.501777	1.92394e-11	0.453452	2.75424e-38	0.873025	0.0596031
ENSG00000072110	ACTN1	actinin, alpha 1 [Source:HGNC Symbol;Acc:HGNC:163]	1.90733	9.99796e-12		ENSMUSG00000015143	Actn1	actinin, alpha 1 [Source:MGI Symbol;Acc:MGI:2137706]	1.79572	1.37547e-06	1.29027	0.00158204	1.59507	7.60892e-19
ENSG00000189308	LIN54	lin-54 DREAM MuvB core complex component [Source:HGNC Symbol;Acc:HGNC:25397]	1.9067	6.50732e-06		ENSMUSG00000035310	Lin54	lin-54 homolog (C. elegans) [Source:MGI Symbol;Acc:MGI:2140902]	3.33344	1.84179e-40	2.11658	5.91762e-37	2.18606	4.00995e-29
ENSG00000137575	SDCBP	syndecan binding protein (syntenin) [Source:HGNC Symbol;Acc:HGNC:10662]	1.90506	6.65681e-09		ENSMUSG00000028249	Sdcbp	syndecan binding protein [Source:MGI Symbol;Acc:MGI:1337026]	3.06045	2.33428e-22	2.96339	2.26564e-66	2.26334	9.71552e-59
ENSG00000107819	SFXN3	sideroflexin 3 [Source:HGNC Symbol;Acc:HGNC:16087]	1.90466	2.21371e-13		ENSMUSG00000025212	Sfxn3	sideroflexin 3 [Source:MGI Symbol;Acc:MGI:2137679]	1.08201	0.409642	1.32889	4.11667e-05	1.42781	9.28969e-15
ENSG00000140941	MAP1LC3B	microtubule-associated protein 1 light chain 3 beta [Source:HGNC Symbol;Acc:HGNC:13352]	1.90378	1.82726e-07		ENSMUSG00000031812	Map1lc3b	microtubule-associated protein 1 light chain 3 beta [Source:MGI Symbol;Acc:MGI:1914693]	1.44166	1.6318e-05	1.28668	7.77701e-05	1.59737	1.00921e-27
ENSG00000117500	TMED5	transmembrane emp24 protein transport domain containing 5 [Source:HGNC Symbol;Acc:HGNC:24251]	1.90273	1.82129e-09		ENSMUSG00000063406	Tmed5	transmembrane emp24 protein transport domain containing 5 [Source:MGI Symbol;Acc:MGI:1921586]	3.01375	2.12651e-25	2.10402	1.61153e-26	1.87482	1.2209e-23
ENSG00000141682	PMAIP1	phorbol-12-myristate-13-acetate-induced protein 1 [Source:HGNC Symbol;Acc:HGNC:9108]	1.90071	0.00128102		ENSMUSG00000024521	Pmaip1	phorbol-12-myristate-13-acetate-induced protein 1 [Source:MGI Symbol;Acc:MGI:1930146]	5.64594	8.78858e-25	3.12371	3.80522e-22	3.53557	9.39466e-05
ENSG00000112078	KCTD20	potassium channel tetramerization domain containing 20 [Source:HGNC Symbol;Acc:HGNC:21052]	1.90067	4.99239e-11		ENSMUSG00000005936	Kctd20	potassium channel tetramerisation domain containing 20 [Source:MGI Symbol;Acc:MGI:1914239]	1.17395	0.149194	1.14317	0.0219862	1.36951	1.48654e-11
ENSG00000010270	STARD3NL	STARD3 N-terminal like [Source:HGNC Symbol;Acc:HGNC:19169]	1.89978	3.86889e-19		ENSMUSG00000003062	Stard3nl	STARD3 N-terminal like [Source:MGI Symbol;Acc:MGI:1923455]	0.868158	0.084783	0.83958	0.0110724	0.819719	0.00192276
ENSG00000198435	NRARP	NOTCH-regulated ankyrin repeat protein [Source:HGNC Symbol;Acc:HGNC:33843]	1.89951	1.24068e-06		ENSMUSG00000078202	Nrarp	Notch-regulated ankyrin repeat protein [Source:MGI Symbol;Acc:MGI:1914372]	0.321371	1.03113e-08	0.922591	0.79774	2.81581	2.46738e-08
ENSG00000196505	GDAP2	ganglioside induced differentiation associated protein 2 [Source:HGNC Symbol;Acc:HGNC:18010]	1.89869	4.83018e-07		ENSMUSG00000027865	Gdap2	ganglioside-induced differentiation-associated-protein 2 [Source:MGI Symbol;Acc:MGI:1338001]	1.13673	0.229979	1.15351	0.0417075	1.22643	0.00709586
ENSG00000077585	GPR137B	G protein-coupled receptor 137B [Source:HGNC Symbol;Acc:HGNC:11862]	1.89731	1.87949e-08		ENSMUSG00000021306	Gpr137b	G protein-coupled receptor 137B [Source:MGI Symbol;Acc:MGI:1891463]	1.78321	0.00808027	1.36285	0.0001527	1.38942	1.79898e-08
ENSG00000115762	PLEKHB2	pleckstrin homology domain containing, family B (evectins) member 2 [Source:HGNC Symbol;Acc:HGNC:19236]	1.89727	7.3441e-15		ENSMUSG00000026123	Plekhb2	pleckstrin homology domain containing, family B (evectins) member 2 [Source:MGI Symbol;Acc:MGI:2385825]	0.828136	0.117741	0.958838	0.603902	0.98091	0.838511
ENSG00000147155	EBP	emopamil binding protein (sterol isomerase) [Source:HGNC Symbol;Acc:HGNC:3133]	1.89699	1.87799e-16		ENSMUSG00000031168	Ebp	phenylalkylamine Ca2+ antagonist (emopamil) binding protein [Source:MGI Symbol;Acc:MGI:107822]	3.43189	1.29301e-15	2.97943	8.32979e-37	2.06164	3.42777e-14
ENSG00000121274	PAPD5	PAP associated domain containing 5 [Source:HGNC Symbol;Acc:HGNC:30758]	1.8966	6.9817e-08		ENSMUSG00000036779	Papd5	PAP associated domain containing 5 [Source:MGI Symbol;Acc:MGI:1917820]	1.15062	0.126684	1.29879	3.20455e-05	1.2351	0.000168397
ENSG00000173598	NUDT4	nudix (nucleoside diphosphate linked moiety X)-type motif 4 [Source:HGNC Symbol;Acc:HGNC:8051]	1.89617	2.75546e-08		ENSMUSG00000020029	Nudt4	nudix (nucleoside diphosphate linked moiety X)-type motif 4 [Source:MGI Symbol;Acc:MGI:1918457]	1.16102	0.113491	1.30376	1.26499e-06	1.58214	3.56166e-29
ENSG00000100796	PPP4R3A	protein phosphatase 4, regulatory subunit 3A [Source:HGNC Symbol;Acc:HGNC:20219]	1.89525	5.59818e-08		ENSMUSG00000041846	Smek1	SMEK homolog 1, suppressor of mek1 (Dictyostelium) [Source:MGI Symbol;Acc:MGI:1915984]	4.07229	1.72208e-42	2.07211	2.66266e-39	1.72838	4.26426e-17
ENSG00000174738	NR1D2	nuclear receptor subfamily 1, group D, member 2 [Source:HGNC Symbol;Acc:HGNC:7963]	1.89469	8.03752e-06		ENSMUSG00000021775	Nr1d2	nuclear receptor subfamily 1, group D, member 2 [Source:MGI Symbol;Acc:MGI:2449205]	1.67002	6.10173e-07	2.34181	9.58677e-29	1.64747	1.49795e-16
ENSG00000106484	MEST	mesoderm specific transcript [Source:HGNC Symbol;Acc:HGNC:7028]	1.89435	6.20163e-09		ENSMUSG00000051855	Mest	mesoderm specific transcript [Source:MGI Symbol;Acc:MGI:96968]	5.93079	9.58677e-67	2.29635	1.43586e-39	0.859259	0.0167877
ENSG00000135269	TES	testin LIM domain protein [Source:HGNC Symbol;Acc:HGNC:14620]	1.89375	3.80127e-08		ENSMUSG00000029552	Tes	testis derived transcript [Source:MGI Symbol;Acc:MGI:105081]	3.15325	2.77682e-24	1.54945	5.0202e-11	2.53281	1.84002e-61
ENSG00000139318	DUSP6	dual specificity phosphatase 6 [Source:HGNC Symbol;Acc:HGNC:3072]	1.89255	1.05682e-16		ENSMUSG00000019960	Dusp6	dual specificity phosphatase 6 [Source:MGI Symbol;Acc:MGI:1914853]	4.23791	2.84425e-84	8.2161	2.73621e-223	1.89511	1.41553e-17
ENSG00000116991	SIPA1L2	signal-induced proliferation-associated 1 like 2 [Source:HGNC Symbol;Acc:HGNC:23800]	1.89122	2.57506e-08		ENSMUSG00000001995	Sipa1l2	signal-induced proliferation-associated 1 like 2 [Source:MGI Symbol;Acc:MGI:2676970]	1.87211	2.04523e-08	2.65391	3.65006e-69	4.14211	6.08075e-121
ENSG00000186866	POFUT2	protein O-fucosyltransferase 2 [Source:HGNC Symbol;Acc:HGNC:14683]	1.89081	1.43644e-09		ENSMUSG00000020260	Pofut2	protein O-fucosyltransferase 2 [Source:MGI Symbol;Acc:MGI:1916863]	1.54479	5.68498e-06	1.4471	5.17656e-09	1.23228	6.29607e-05
ENSG00000139826	ABHD13	abhydrolase domain containing 13 [Source:HGNC Symbol;Acc:HGNC:20293]	1.88734	8.86106e-08		ENSMUSG00000040396	Abhd13	abhydrolase domain containing 13 [Source:MGI Symbol;Acc:MGI:1916154]	0.648035	9.55658e-08	0.81168	0.000750467	1.11352	0.105185
ENSG00000008324	SS18L2	synovial sarcoma translocation gene on chromosome 18-like 2 [Source:HGNC Symbol;Acc:HGNC:15593]	1.88597	1.99149e-12		ENSMUSG00000032526	Deb1	differentially expressed in B16F10 1 [Source:MGI Symbol;Acc:MGI:1349474]	1.94315	5.25427e-11	1.86817	4.78796e-16	1.69211	5.68085e-10
ENSG00000146592	CREB5	cAMP responsive element binding protein 5 [Source:HGNC Symbol;Acc:HGNC:16844]	1.88399	0.00375617		ENSMUSG00000053007	Creb5	cAMP responsive element binding protein 5 [Source:MGI Symbol;Acc:MGI:2443973]	3.26937	4.30371e-13	1.97697	5.71436e-12	0.993704	0.981504
ENSG00000135070	ISCA1	iron-sulfur cluster assembly 1 [Source:HGNC Symbol;Acc:HGNC:28660]	1.88373	7.67575e-07		ENSMUSG00000044792	Isca1	iron-sulfur cluster assembly 1 homolog (S. cerevisiae) [Source:MGI Symbol;Acc:MGI:1916296]	1.50012	1.03052e-09	2.03005	2.14962e-34	1.68769	8.89897e-23
ENSG00000172380	GNG12	guanine nucleotide binding protein (G protein), gamma 12 [Source:HGNC Symbol;Acc:HGNC:19663]	1.88339	2.15464e-08		ENSMUSG00000036402	Gng12	guanine nucleotide binding protein (G protein), gamma 12 [Source:MGI Symbol;Acc:MGI:1336171]	1.27305	0.000645909	1.2696	0.000133313	1.60363	3.02565e-24
ENSG00000065809	FAM107B	family with sequence similarity 107, member B [Source:HGNC Symbol;Acc:HGNC:23726]	1.8832	9.15934e-16		ENSMUSG00000026655	Fam107b	family with sequence similarity 107, member B [Source:MGI Symbol;Acc:MGI:1913790]	9.2205	4.40024e-51	3.97667	1.41743e-178	2.98804	7.62754e-88
ENSG00000023734	STRAP	serine/threonine kinase receptor associated protein [Source:HGNC Symbol;Acc:HGNC:30796]	1.87939	1.75881e-16		ENSMUSG00000030224	Strap	serine/threonine kinase receptor associated protein [Source:MGI Symbol;Acc:MGI:1329037]	1.50083	1.23156e-05	1.49566	1.62798e-11	1.33634	1.27683e-09
ENSG00000175931	UBE2O	ubiquitin-conjugating enzyme E2O [Source:HGNC Symbol;Acc:HGNC:29554]	1.878	2.80449e-06		ENSMUSG00000020802	Ube2o	ubiquitin-conjugating enzyme E2O [Source:MGI Symbol;Acc:MGI:2444266]	1.37148	3.06024e-07	1.78531	2.33964e-33	1.46165	2.52186e-14
ENSG00000133065	SLC41A1	solute carrier family 41 (magnesium transporter), member 1 [Source:HGNC Symbol;Acc:HGNC:19429]	1.87773	2.72039e-06		ENSMUSG00000013275	Slc41a1	solute carrier family 41, member 1 [Source:MGI Symbol;Acc:MGI:2444823]	1.16685	0.0405567	1.04553	0.632953	1.20265	0.00109136
ENSG00000274211	SOCS7	suppressor of cytokine signaling 7 [Source:HGNC Symbol;Acc:HGNC:29846]	1.8776	1.61863e-09		ENSMUSG00000038485	Socs7	suppressor of cytokine signaling 7 [Source:MGI Symbol;Acc:MGI:2651588]	1.18179	0.0814119	1.52553	1.63319e-13	1.43858	1.27915e-12
ENSG00000120889	TNFRSF10B	tumor necrosis factor receptor superfamily, member 10b [Source:HGNC Symbol;Acc:HGNC:11905]	1.87747	1.72933e-13		ENSMUSG00000022074	Tnfrsf10b	tumor necrosis factor receptor superfamily, member 10b [Source:MGI Symbol;Acc:MGI:1341090]	1.28573	0.219731	1.56458	0.0119652	1.09437	0.38689
ENSG00000172375	C2CD2L	C2CD2-like [Source:HGNC Symbol;Acc:HGNC:29000]	1.87714	5.20547e-09		ENSMUSG00000032120	C2cd2l	C2 calcium-dependent domain containing 2-like [Source:MGI Symbol;Acc:MGI:1919014]	0.892462	0.239368	1.01817	0.862184	1.08735	0.268586
ENSG00000170525	PFKFB3	6-phosphofructo-2-kinase/fructose-2,6-biphosphatase 3 [Source:HGNC Symbol;Acc:HGNC:8874]	1.87693	6.0069e-07		ENSMUSG00000026773	Pfkfb3	6-phosphofructo-2-kinase/fructose-2,6-biphosphatase 3 [Source:MGI Symbol;Acc:MGI:2181202]	1.3222	0.0326885	0.978705	0.832479	1.47468	2.37617e-16
ENSG00000065135	GNAI3	guanine nucleotide binding protein (G protein), alpha inhibiting activity polypeptide 3 [Source:HGNC Symbol;Acc:HGNC:4387]	1.8769	2.75378e-13		ENSMUSG00000000001	Gnai3	guanine nucleotide binding protein (G protein), alpha inhibiting 3 [Source:MGI Symbol;Acc:MGI:95773]	1.52958	1.86158e-07	1.05927	0.436735	1.28364	6.07128e-08
ENSG00000144369	FAM171B	family with sequence similarity 171, member B [Source:HGNC Symbol;Acc:HGNC:29412]	1.87678	1.46759e-05		ENSMUSG00000048388	Fam171b	family with sequence similarity 171, member B [Source:MGI Symbol;Acc:MGI:2444579]	1.04374	0.757242	1.35464	1.74241e-10	0.939579	0.308566
ENSG00000197121	PGAP1	post-GPI attachment to proteins 1 [Source:HGNC Symbol;Acc:HGNC:25712]	1.87642	0.000981473		ENSMUSG00000073678	Pgap1	post-GPI attachment to proteins 1 [Source:MGI Symbol;Acc:MGI:2443342]	1.52794	0.00183396	1.56804	4.57176e-19	1.11963	0.0745065
ENSG00000140743	CDR2	cerebellar degeneration-related protein 2, 62kDa [Source:HGNC Symbol;Acc:HGNC:1799]	1.87373	2.27852e-09		ENSMUSG00000030878	Cdr2	cerebellar degeneration-related 2 [Source:MGI Symbol;Acc:MGI:1100885]	3.56986	9.10277e-47	1.77347	5.18282e-13	2.02761	4.02585e-21
ENSG00000168264	IRF2BP2	interferon regulatory factor 2 binding protein 2 [Source:HGNC Symbol;Acc:HGNC:21729]	1.87334	3.56657e-06		ENSMUSG00000051495	Irf2bp2	interferon regulatory factor 2 binding protein 2 [Source:MGI Symbol;Acc:MGI:2443921]	5.24985	1.35168e-33	3.60796	2.68443e-16	2.85562	5.74663e-69
ENSG00000170921	TANC2	tetratricopeptide repeat, ankyrin repeat and coiled-coil containing 2 [Source:HGNC Symbol;Acc:HGNC:30212]	1.87304	1.08568e-10		ENSMUSG00000053580	Tanc2	tetratricopeptide repeat, ankyrin repeat and coiled-coil containing 2 [Source:MGI Symbol;Acc:MGI:2444121]	1.32613	0.03339	1.42313	1.32957e-11	1.52587	9.08833e-12
ENSG00000209082	MT-TL1	mitochondrially encoded tRNA leucine 1 (UUA/G) [Source:HGNC Symbol;Acc:HGNC:7490]	1.87202	0.00242249		ENSMUSG00000064340	mt-Tl1	mitochondrially encoded tRNA leucine 1 [Source:MGI Symbol;Acc:MGI:102482]	1.23488	0.653147	1.05117	0.934476	1.22117	0.387988
ENSG00000122696	SLC25A51	solute carrier family 25, member 51 [Source:HGNC Symbol;Acc:HGNC:23323]	1.87146	3.88076e-06		ENSMUSG00000045973	Slc25a51	solute carrier family 25, member 51 [Source:MGI Symbol;Acc:MGI:2684984]	0.822237	0.0329208	0.841084	0.00188426	0.98076	0.781512
ENSG00000184156	KCNQ3	potassium channel, voltage gated KQT-like subfamily Q, member 3 [Source:HGNC Symbol;Acc:HGNC:6297]	1.87073	1.01825e-07		ENSMUSG00000056258	Kcnq3	potassium voltage-gated channel, subfamily Q, member 3 [Source:MGI Symbol;Acc:MGI:1336181]	0.996496	0.855198	1.41606	4.9831e-10	0.858905	0.00523478
ENSG00000100784	RPS6KA5	ribosomal protein S6 kinase, 90kDa, polypeptide 5 [Source:HGNC Symbol;Acc:HGNC:10434]	1.86866	0.0840328		ENSMUSG00000021180	Rps6ka5	ribosomal protein S6 kinase, polypeptide 5 [Source:MGI Symbol;Acc:MGI:1920336]	0.700152	6.29105e-06	0.468808	1.43228e-38	0.996523	0.97056
ENSG00000113384	GOLPH3	golgi phosphoprotein 3 (coat-protein) [Source:HGNC Symbol;Acc:HGNC:15452]	1.86861	4.49473e-09		ENSMUSG00000022200	Golph3	golgi phosphoprotein 3 [Source:MGI Symbol;Acc:MGI:1913879]	1.79767	2.25584e-10	1.84638	6.64481e-31	1.52369	9.04786e-19
ENSG00000163349	HIPK1	homeodomain interacting protein kinase 1 [Source:HGNC Symbol;Acc:HGNC:19006]	1.86794	7.53621e-07		ENSMUSG00000008730	Hipk1	homeodomain interacting protein kinase 1 [Source:MGI Symbol;Acc:MGI:1314873]	1.70314	0.00023036	1.5068	1.4081e-14	1.63803	4.70149e-26
ENSG00000102390	PBDC1	polysaccharide biosynthesis domain containing 1 [Source:HGNC Symbol;Acc:HGNC:28790]	1.86689	5.05892e-08		ENSMUSG00000031226	Pbdc1	polysaccharide biosynthesis domain containing 1 [Source:MGI Symbol;Acc:MGI:1914933]	2.31751	4.42075e-21	1.25083	0.00253294	1.6476	1.71852e-11
ENSG00000166889	PATL1	protein associated with topoisomerase II homolog 1 (yeast) [Source:HGNC Symbol;Acc:HGNC:26721]	1.86654	7.4373e-13		ENSMUSG00000046139	Patl1	protein associated with topoisomerase II homolog 1 (yeast) [Source:MGI Symbol;Acc:MGI:2147679]	1.19697	0.0575707	1.30149	0.000274992	1.62518	6.39635e-20
ENSG00000141568	FOXK2	forkhead box K2 [Source:HGNC Symbol;Acc:HGNC:6036]	1.8636	3.19517e-09		ENSMUSG00000039275	Foxk2	forkhead box K2 [Source:MGI Symbol;Acc:MGI:1916087]	0.904991	0.155675	1.19348	0.00292901	1.18958	0.000161718
ENSG00000153561	RMND5A	required for meiotic nuclear division 5 homolog A [Source:HGNC Symbol;Acc:HGNC:25850]	1.86301	3.51338e-05		ENSMUSG00000002222	Rmnd5a	required for meiotic nuclear division 5 homolog A (S. cerevisiae) [Source:MGI Symbol;Acc:MGI:1915727]	1.50847	4.78343e-07	1.42399	2.51912e-09	1.54295	6.04912e-23
ENSG00000119787	ATL2	atlastin GTPase 2 [Source:HGNC Symbol;Acc:HGNC:24047]	1.86225	4.0409e-10		ENSMUSG00000059811	Atl2	atlastin GTPase 2 [Source:MGI Symbol;Acc:MGI:1929492]	1.58084	1.69096e-10	2.39293	6.52616e-41	1.38548	9.01387e-10
ENSG00000101773	RBBP8	retinoblastoma binding protein 8 [Source:HGNC Symbol;Acc:HGNC:9891]	1.8601	2.93303e-14		ENSMUSG00000041238	Rbbp8	retinoblastoma binding protein 8 [Source:MGI Symbol;Acc:MGI:2442995]	1.36143	0.0560802	1.23627	0.0194619	1.15856	0.152007
ENSG00000101438	SLC32A1	solute carrier family 32 (GABA vesicular transporter), member 1 [Source:HGNC Symbol;Acc:HGNC:11018]	1.85968	0.0333496		ENSMUSG00000037771	Slc32a1	solute carrier family 32 (GABA vesicular transporter), member 1 [Source:MGI Symbol;Acc:MGI:1194488]	1.10956	0.523832	1.52066	7.65939e-11	1.37558	3.56157e-06
ENSG00000066027	PPP2R5A	protein phosphatase 2, regulatory subunit B', alpha [Source:HGNC Symbol;Acc:HGNC:9309]	1.85888	1.2999e-11		ENSMUSG00000026626	Ppp2r5a	protein phosphatase 2, regulatory subunit B', alpha [Source:MGI Symbol;Acc:MGI:2388479]	1.70226	4.48459e-12	1.97546	2.15273e-27	1.58757	2.50974e-14
ENSG00000198743	SLC5A3	solute carrier family 5 (sodium/myo-inositol cotransporter), member 3 [Source:HGNC Symbol;Acc:HGNC:11038]	1.85874	1.94224e-18		ENSMUSG00000089774	Slc5a3	solute carrier family 5 (inositol transporters), member 3 [Source:MGI Symbol;Acc:MGI:1858226]	2.84007	4.26518e-40	2.56731	1.34705e-65	3.47613	2.01648e-21
ENSG00000108559	NUP88	nucleoporin 88kDa [Source:HGNC Symbol;Acc:HGNC:8067]	1.85633	6.94887e-12		ENSMUSG00000040667	Nup88	nucleoporin 88 [Source:MGI Symbol;Acc:MGI:104900]	0.648207	4.62965e-12	0.828289	0.00203195	0.8497	0.00949844
ENSG00000173276	ZBTB21	zinc finger and BTB domain containing 21 [Source:HGNC Symbol;Acc:HGNC:13083]	1.85558	1.5642e-06		ENSMUSG00000046962	Zbtb21	zinc finger and BTB domain containing 21 [Source:MGI Symbol;Acc:MGI:1927240]	2.88347	7.07923e-26	2.15495	6.81809e-37	1.59122	5.75418e-11
ENSG00000143319	ISG20L2	interferon stimulated exonuclease gene 20kDa-like 2 [Source:HGNC Symbol;Acc:HGNC:25745]	1.85342	2.04145e-06		ENSMUSG00000048039	Isg20l2	interferon stimulated exonuclease gene 20-like 2 [Source:MGI Symbol;Acc:MGI:2140076]	1.05244	0.817686	0.875426	0.0812858	1.1581	0.031644
ENSG00000153201	RANBP2	RAN binding protein 2 [Source:HGNC Symbol;Acc:HGNC:9848]	1.85292	0.00013081		ENSMUSG00000003226	Ranbp2	RAN binding protein 2 [Source:MGI Symbol;Acc:MGI:894323]	2.6403	2.85193e-18	1.99011	9.07766e-47	1.37741	5.22656e-10
ENSG00000170456	DENND5B	DENN/MADD domain containing 5B [Source:HGNC Symbol;Acc:HGNC:28338]	1.85035	8.9354e-10		ENSMUSG00000030313	Dennd5b	DENN/MADD domain containing 5B [Source:MGI Symbol;Acc:MGI:2444273]	1.99485	1.98708e-16	2.33353	7.97563e-63	1.66427	6.64492e-12
ENSG00000107249	GLIS3	GLIS family zinc finger 3 [Source:HGNC Symbol;Acc:HGNC:28510]	1.84757	0.000255987		ENSMUSG00000052942	Glis3	GLIS family zinc finger 3 [Source:MGI Symbol;Acc:MGI:2444289]	2.20765	3.34304e-15	1.20806	0.0331723	1.69921	7.04502e-14
ENSG00000105849	TWISTNB	TWIST neighbor [Source:HGNC Symbol;Acc:HGNC:18027]	1.84734	2.08637e-07		ENSMUSG00000020561	Twistnb	twist basic helix-loop-helix transcription factor 1 neighbor [Source:MGI Symbol;Acc:MGI:106292]	0.544258	7.43966e-07	0.846761	0.0788009	0.873134	0.157887
ENSG00000204065	TCEAL5	transcription elongation factor A (SII)-like 5 [Source:HGNC Symbol;Acc:HGNC:22282]	1.84687	0.460782		ENSMUSG00000054034	Tceal5	transcription elongation factor A (SII)-like 5 [Source:MGI Symbol;Acc:MGI:3036236]	1.19141	0.100218	2.0724	4.81743e-15	1.40962	0.000177151
ENSG00000140044	JDP2	Jun dimerization protein 2 [Source:HGNC Symbol;Acc:HGNC:17546]	1.84632	0.000479858		ENSMUSG00000034271	Jdp2	Jun dimerization protein 2 [Source:MGI Symbol;Acc:MGI:1932093]	0.915486	0.688294	2.02041	1.26333e-14	1.79736	1.38972e-16
ENSG00000179981	TSHZ1	teashirt zinc finger homeobox 1 [Source:HGNC Symbol;Acc:HGNC:10669]	1.84576	0.000887597		ENSMUSG00000046982	Tshz1	teashirt zinc finger family member 1 [Source:MGI Symbol;Acc:MGI:1346031]	1.82812	1.78394e-07	1.58647	1.09942e-16	1.5509	8.49035e-13
ENSG00000130449	ZSWIM6	zinc finger, SWIM-type containing 6 [Source:HGNC Symbol;Acc:HGNC:29316]	1.84558	4.50214e-05		ENSMUSG00000032846	Zswim6	zinc finger SWIM-type containing 6 [Source:MGI Symbol;Acc:MGI:1914513]	2.19582	1.91793e-23	2.15018	1.15221e-58	1.83023	1.00534e-20
ENSG00000185559	DLK1	delta-like 1 homolog (Drosophila) [Source:HGNC Symbol;Acc:HGNC:2907]	1.84536	0.000110355		ENSMUSG00000040856	Dlk1	delta-like 1 homolog (Drosophila) [Source:MGI Symbol;Acc:MGI:94900]	1.66675	0.000139058	1.34883	0.153181	1.3228	0.00818973
ENSG00000130821	SLC6A8	solute carrier family 6 (neurotransmitter transporter), member 8 [Source:HGNC Symbol;Acc:HGNC:11055]	1.8443	2.0144e-05		ENSMUSG00000019558	Slc6a8	solute carrier family 6 (neurotransmitter transporter, creatine), member 8 [Source:MGI Symbol;Acc:MGI:2147834]	1.63166	1.35139e-11	1.60293	2.34261e-16	1.94564	1.82206e-06
ENSG00000026508	CD44	CD44 molecule (Indian blood group) [Source:HGNC Symbol;Acc:HGNC:1681]	1.84421	0.000677107		ENSMUSG00000005087	Cd44	CD44 antigen [Source:MGI Symbol;Acc:MGI:88338]	3.26081	2.5506e-30	1.53915	6.13935e-06	2.49853	1.86968e-06
ENSG00000066735	KIF26A	kinesin family member 26A [Source:HGNC Symbol;Acc:HGNC:20226]	1.84386	1.5074e-09		ENSMUSG00000021294	Kif26a	kinesin family member 26A [Source:MGI Symbol;Acc:MGI:2447072]	0.39771	1.94744e-08	0.491053	4.17095e-18	0.910292	0.499914
ENSG00000146386	ABRACL	ABRA C-terminal like [Source:HGNC Symbol;Acc:HGNC:21230]	1.84247	3.62264e-11		ENSMUSG00000078453	Abracl	ABRA C-terminal like [Source:MGI Symbol;Acc:MGI:1920362]	1.32981	0.137032	0.731798	0.00513161	1.24062	0.0440107
ENSG00000135862	LAMC1	laminin, gamma 1 (formerly LAMB2) [Source:HGNC Symbol;Acc:HGNC:6492]	1.84023	2.0228e-05		ENSMUSG00000026478	Lamc1	laminin, gamma 1 [Source:MGI Symbol;Acc:MGI:99914]	1.88936	2.64651e-07	1.21145	0.00360086	1.27384	1.58312e-09
ENSG00000170892	TSEN34	TSEN34 tRNA splicing endonuclease subunit [Source:HGNC Symbol;Acc:HGNC:15506]	1.84019	7.32018e-08		ENSMUSG00000035585	Tsen34	tRNA splicing endonuclease 34 homolog (S. cerevisiae) [Source:MGI Symbol;Acc:MGI:1913328]	1.09293	0.657181	0.967919	0.713703	1.1312	0.0287286
ENSG00000185262	UBALD2	UBA-like domain containing 2 [Source:HGNC Symbol;Acc:HGNC:28438]	1.83859	0.00102409		ENSMUSG00000050628	Ubald2	UBA-like domain containing 2 [Source:MGI Symbol;Acc:MGI:1914635]	1.06379	0.764398	0.831266	0.0565186	1.1164	0.395945
ENSG00000143367	TUFT1	tuftelin 1 [Source:HGNC Symbol;Acc:HGNC:12422]	1.83758	0.000100869		ENSMUSG00000005968	Tuft1	tuftelin 1 [Source:MGI Symbol;Acc:MGI:109572]	1.54583	0.0268116	0.666895	0.0104303	1.34728	0.0338809
ENSG00000047056	WDR37	WD repeat domain 37 [Source:HGNC Symbol;Acc:HGNC:31406]	1.8353	9.37651e-08		ENSMUSG00000021147	Wdr37	WD repeat domain 37 [Source:MGI Symbol;Acc:MGI:1920393]	0.706421	6.3693e-10	0.767152	4.03565e-06	0.858301	0.00396064
ENSG00000180667	YOD1	YOD1 deubiquitinase [Source:HGNC Symbol;Acc:HGNC:25035]	1.83511	0.000108691		ENSMUSG00000046404	Yod1	YOD1 OTU deubiquitinating enzyme 1 homologue (S. cerevisiae) [Source:MGI Symbol;Acc:MGI:2442596]	0.754212	0.0321701	0.928551	0.419797	1.41083	5.70161e-05
ENSG00000157514	TSC22D3	TSC22 domain family, member 3 [Source:HGNC Symbol;Acc:HGNC:3051]	1.83408	5.19316e-07		ENSMUSG00000031431	Tsc22d3	TSC22 domain family, member 3 [Source:MGI Symbol;Acc:MGI:1196284]	2.38457	4.47358e-12	1.60743	5.11528e-12	1.76443	1.19426e-15
ENSG00000062582	MRPS24	mitochondrial ribosomal protein S24 [Source:HGNC Symbol;Acc:HGNC:14510]	1.83297	0.00170092		ENSMUSG00000020477	Mrps24	mitochondrial ribosomal protein S24 [Source:MGI Symbol;Acc:MGI:1928142]	1.00018	0.98754	0.790158	0.0069305	1.10106	0.37794
ENSG00000110172	CHORDC1	cysteine and histidine-rich domain (CHORD) containing 1 [Source:HGNC Symbol;Acc:HGNC:14525]	1.83284	1.66154e-07		ENSMUSG00000001774	Chordc1	cysteine and histidine-rich domain (CHORD)-containing, zinc-binding protein 1 [Source:MGI Symbol;Acc:MGI:1914167]	0.805888	0.00484065	0.775831	1.86267e-05	0.979805	0.835587
ENSG00000179119	SPTY2D1	SPT2, Suppressor of Ty, domain containing 1 (S. cerevisiae) [Source:HGNC Symbol;Acc:HGNC:26818]	1.83235	1.84611e-05		ENSMUSG00000049516	Spty2d1	SPT2, Suppressor of Ty, domain containing 1 (S. cerevisiae) [Source:MGI Symbol;Acc:MGI:2142062]	21.3197	2.01758e-107	13.7067	4.52415e-63	2.40515	5.09223e-38
ENSG00000139323	POC1B	POC1 centriolar protein B [Source:HGNC Symbol;Acc:HGNC:30836]	1.83223	1.10449e-06		ENSMUSG00000019952	Poc1b	POC1 centriolar protein homolog B (Chlamydomonas) [Source:MGI Symbol;Acc:MGI:1918511]	2.71936	6.6571e-14	2.39154	6.04833e-28	1.40657	0.000197332
ENSG00000131398	KCNC3	potassium channel, voltage gated Shaw related subfamily C, member 3 [Source:HGNC Symbol;Acc:HGNC:6235]	1.83188	5.71348e-11		ENSMUSG00000062785	Kcnc3	potassium voltage gated channel, Shaw-related subfamily, member 3 [Source:MGI Symbol;Acc:MGI:96669]	1.43831	1.30276e-05	1.55838	6.65568e-05	1.51903	1.25488e-08
ENSG00000148154	UGCG	UDP-glucose ceramide glucosyltransferase [Source:HGNC Symbol;Acc:HGNC:12524]	1.83046	2.49818e-15		ENSMUSG00000028381	Ugcg	UDP-glucose ceramide glucosyltransferase [Source:MGI Symbol;Acc:MGI:1332243]	0.739644	0.00479809	1.03201	0.699311	0.800521	9.08824e-05
ENSG00000092621	PHGDH	phosphoglycerate dehydrogenase [Source:HGNC Symbol;Acc:HGNC:8923]	1.83021	0.00283854		ENSMUSG00000053398	Phgdh	3-phosphoglycerate dehydrogenase [Source:MGI Symbol;Acc:MGI:1355330]	1.51768	0.451662	1.24303	0.000220965	1.30541	3.56685e-08
ENSG00000144824	PHLDB2	pleckstrin homology-like domain, family B, member 2 [Source:HGNC Symbol;Acc:HGNC:29573]	1.82911	1.32242e-05		ENSMUSG00000033149	Phldb2	pleckstrin homology-like domain, family B, member 2 [Source:MGI Symbol;Acc:MGI:2444981]	1.24159	0.299548	1.02917	0.805891	1.59744	1.30539e-19
ENSG00000198513	ATL1	atlastin GTPase 1 [Source:HGNC Symbol;Acc:HGNC:11231]	1.82904	2.56708e-08		ENSMUSG00000021066	Atl1	atlastin GTPase 1 [Source:MGI Symbol;Acc:MGI:1921241]	0.914998	0.404551	0.610308	7.58191e-18	0.765909	1.98844e-06
ENSG00000166483	WEE1	WEE1 G2 checkpoint kinase [Source:HGNC Symbol;Acc:HGNC:12761]	1.82883	0.0025406		ENSMUSG00000031016	Wee1	WEE 1 homolog 1 (S. pombe) [Source:MGI Symbol;Acc:MGI:103075]	1.03154	0.942933	0.904104	0.573434	1.00896	0.980419
ENSG00000125772	GPCPD1	glycerophosphocholine phosphodiesterase 1 [Source:HGNC Symbol;Acc:HGNC:26957]	1.82851	0.000569244		ENSMUSG00000027346	Gpcpd1	glycerophosphocholine phosphodiesterase GDE1 homolog (S. cerevisiae) [Source:MGI Symbol;Acc:MGI:104898]	0.700089	5.52984e-06	0.698504	3.3928e-09	0.741045	3.76906e-07
ENSG00000117036	ETV3	ets variant 3 [Source:HGNC Symbol;Acc:HGNC:3492]	1.82746	5.37441e-07		ENSMUSG00000003382	Etv3	ets variant 3 [Source:MGI Symbol;Acc:MGI:1350926]	2.90526	2.15522e-25	2.43786	6.00995e-45	1.51231	8.9732e-10
ENSG00000156535	CD109	CD109 molecule [Source:HGNC Symbol;Acc:HGNC:21685]	1.8273	4.89085e-05		ENSMUSG00000046186	Cd109	CD109 antigen [Source:MGI Symbol;Acc:MGI:2445221]	2.34046	1.44453e-09	1.31397	0.00250563	1.16417	0.0050108
ENSG00000261609	GAN	gigaxonin [Source:HGNC Symbol;Acc:HGNC:4137]	1.82656	0.000110355		ENSMUSG00000052557	Gan	giant axonal neuropathy [Source:MGI Symbol;Acc:MGI:1890619]	0.689204	3.37457e-06	0.782479	0.000175368	0.936148	0.394876
ENSG00000155744	FAM126B	family with sequence similarity 126, member B [Source:HGNC Symbol;Acc:HGNC:28593]	1.82548	3.70456e-05		ENSMUSG00000038174	Fam126b	family with sequence similarity 126, member B [Source:MGI Symbol;Acc:MGI:1098784]	2.31722	6.08795e-15	2.83603	1.27766e-86	1.62687	5.6981e-09
ENSG00000159200	RCAN1	regulator of calcineurin 1 [Source:HGNC Symbol;Acc:HGNC:3040]	1.82412	6.96058e-12		ENSMUSG00000022951	Rcan1	regulator of calcineurin 1 [Source:MGI Symbol;Acc:MGI:1890564]	1.23859	0.0629631	1.07898	0.395177	1.29342	7.83575e-06
ENSG00000050405	LIMA1	LIM domain and actin binding 1 [Source:HGNC Symbol;Acc:HGNC:24636]	1.82369	2.96638e-05		ENSMUSG00000023022	Lima1	LIM domain and actin binding 1 [Source:MGI Symbol;Acc:MGI:1920992]	1.66363	5.74835e-05	0.886141	0.0591579	1.49912	3.63695e-15
ENSG00000073803	MAP3K13	mitogen-activated protein kinase kinase kinase 13 [Source:HGNC Symbol;Acc:HGNC:6852]	1.82317	1.21927e-11		ENSMUSG00000033618	Map3k13	mitogen-activated protein kinase kinase kinase 13 [Source:MGI Symbol;Acc:MGI:2444243]	2.25406	4.92644e-18	2.10217	3.61016e-27	1.57769	4.68139e-10
ENSG00000067955	CBFB	core-binding factor, beta subunit [Source:HGNC Symbol;Acc:HGNC:1539]	1.82291	1.50321e-06		ENSMUSG00000031885	Cbfb	core binding factor beta [Source:MGI Symbol;Acc:MGI:99851]	1.26228	0.0910918	0.953294	0.531439	1.02938	0.722005
ENSG00000138670	RASGEF1B	RasGEF domain family, member 1B [Source:HGNC Symbol;Acc:HGNC:24881]	1.82263	2.91083e-07		ENSMUSG00000029333	Rasgef1b	RasGEF domain family, member 1B [Source:MGI Symbol;Acc:MGI:2443755]	6.94907	2.25681e-42	5.39315	3.18254e-12	2.01597	1.69122e-25
ENSG00000011243	AKAP8L	A kinase (PRKA) anchor protein 8-like [Source:HGNC Symbol;Acc:HGNC:29857]	1.82174	7.21536e-11		ENSMUSG00000002625	Akap8l	A kinase (PRKA) anchor protein 8-like [Source:MGI Symbol;Acc:MGI:1860606]	0.920912	0.548912	0.966264	0.743445	1.1102	0.0942512
ENSG00000109606	DHX15	DEAH (Asp-Glu-Ala-His) box helicase 15 [Source:HGNC Symbol;Acc:HGNC:2738]	1.82149	1.16465e-08		ENSMUSG00000029169	Dhx15	DEAH (Asp-Glu-Ala-His) box polypeptide 15 [Source:MGI Symbol;Acc:MGI:1099786]	1.48047	7.43815e-07	1.39535	2.2602e-10	1.40077	1.5527e-14
ENSG00000117519	CNN3	calponin 3, acidic [Source:HGNC Symbol;Acc:HGNC:2157]	1.82094	1.76305e-06		ENSMUSG00000053931	Cnn3	calponin 3, acidic [Source:MGI Symbol;Acc:MGI:1919244]	2.2951	1.24496e-10	1.23148	0.000203041	1.44405	7.5847e-19
ENSG00000147571	CRH	corticotropin releasing hormone [Source:HGNC Symbol;Acc:HGNC:2355]	1.8198	1.96693e-05		ENSMUSG00000049796	Crh	corticotropin releasing hormone [Source:MGI Symbol;Acc:MGI:88496]	7.61793	1.85411e-28	5.43721	2.95691e-09	2.20867	0.000998609
ENSG00000186298	PPP1CC	protein phosphatase 1, catalytic subunit, gamma isozyme [Source:HGNC Symbol;Acc:HGNC:9283]	1.81911	8.20478e-17		ENSMUSG00000004455	Ppp1cc	protein phosphatase 1, catalytic subunit, gamma isoform [Source:MGI Symbol;Acc:MGI:104872]	1.35853	0.000319733	1.27481	6.76311e-06	1.37566	1.21938e-08
ENSG00000179820	MYADM	myeloid-associated differentiation marker [Source:HGNC Symbol;Acc:HGNC:7544]	1.81566	3.41305e-13		ENSMUSG00000068566	Myadm	myeloid-associated differentiation marker [Source:MGI Symbol;Acc:MGI:1355332]	0.634877	3.32479e-07	0.821372	0.0632202	1.24237	4.16174e-06
ENSG00000169836	TACR3	tachykinin receptor 3 [Source:HGNC Symbol;Acc:HGNC:11528]	1.8147	0.00628506		ENSMUSG00000028172	Tacr3	tachykinin receptor 3 [Source:MGI Symbol;Acc:MGI:892968]	3.70295	5.06686e-18	2.18535	4.02929e-09	1.66337	0.000516852
ENSG00000104490	NCALD	neurocalcin delta [Source:HGNC Symbol;Acc:HGNC:7655]	1.81318	4.39993e-12		ENSMUSG00000051359	Ncald	neurocalcin delta [Source:MGI Symbol;Acc:MGI:1196326]	0.929135	0.473053	1.10666	0.0732881	1.62274	1.51439e-19
ENSG00000103496	STX4	syntaxin 4 [Source:HGNC Symbol;Acc:HGNC:11439]	1.81084	9.3104e-13		ENSMUSG00000030805	Stx4a	syntaxin 4A (placental) [Source:MGI Symbol;Acc:MGI:893577]	1.30844	0.0475575	1.45219	9.83424e-05	1.32129	3.68691e-05
ENSG00000214309	MBLAC1	metallo-beta-lactamase domain containing 1 [Source:HGNC Symbol;Acc:HGNC:22180]	1.81024	1.32147e-06		ENSMUSG00000049285	Mblac1	metallo-beta-lactamase domain containing 1 [Source:MGI Symbol;Acc:MGI:2679717]	0.406356	5.56118e-07	0.29111	3.14296e-11	0.381088	0.00017855
ENSG00000176407	KCMF1	potassium channel modulatory factor 1 [Source:HGNC Symbol;Acc:HGNC:20589]	1.80945	3.46411e-16		ENSMUSG00000055239	Kcmf1	potassium channel modulatory factor 1 [Source:MGI Symbol;Acc:MGI:1921537]	1.31258	0.000606427	1.58688	1.83686e-13	1.40781	1.30633e-11
ENSG00000100744	GSKIP	GSK3B interacting protein [Source:HGNC Symbol;Acc:HGNC:20343]	1.80941	3.33408e-12		ENSMUSG00000044715	Gskip	GSK3B interacting protein [Source:MGI Symbol;Acc:MGI:1914037]	0.839968	0.160004	0.735355	0.000707397	1.06418	0.555045
ENSG00000148926	ADM	adrenomedullin [Source:HGNC Symbol;Acc:HGNC:259]	1.80884	0.0425432		ENSMUSG00000030790	Adm	adrenomedullin [Source:MGI Symbol;Acc:MGI:108058]	4.7746	9.30679e-06	3.25037	8.35692e-05	2.71607	4.5325e-30
ENSG00000168243	GNG4	guanine nucleotide binding protein (G protein), gamma 4 [Source:HGNC Symbol;Acc:HGNC:4407]	1.80807	4.5483e-08		ENSMUSG00000021303	Gng4	guanine nucleotide binding protein (G protein), gamma 4 [Source:MGI Symbol;Acc:MGI:102703]	0.977351	0.788181	1.45553	3.67053e-07	1.20276	6.82376e-05
ENSG00000119729	RHOQ	ras homolog family member Q [Source:HGNC Symbol;Acc:HGNC:17736]	1.80789	1.35052e-12		ENSMUSG00000024143	Rhoq	ras homolog gene family, member Q [Source:MGI Symbol;Acc:MGI:1931553]	2.15446	1.72045e-12	1.9237	1.57912e-26	2.27486	3.43318e-48
ENSG00000149564	ESAM	endothelial cell adhesion molecule [Source:HGNC Symbol;Acc:HGNC:17474]	1.8049	0.0018982		ENSMUSG00000001946	Esam	endothelial cell-specific adhesion molecule [Source:MGI Symbol;Acc:MGI:1916774]	1.66689	0.0359923	2.9205	4.63541e-07	1.3677	0.180787
ENSG00000102886	GDPD3	glycerophosphodiester phosphodiesterase domain containing 3 [Source:HGNC Symbol;Acc:HGNC:28638]	1.80224	0.000208906		ENSMUSG00000030703	Gdpd3	glycerophosphodiester phosphodiesterase domain containing 3 [Source:MGI Symbol;Acc:MGI:1915866]	1.11859	0.863562	1.26855	0.461738	0.89368	0.84863
ENSG00000131323	TRAF3	TNF receptor-associated factor 3 [Source:HGNC Symbol;Acc:HGNC:12033]	1.80149	2.99344e-11		ENSMUSG00000021277	Traf3	TNF receptor-associated factor 3 [Source:MGI Symbol;Acc:MGI:108041]	1.23147	0.00413733	1.17484	0.0097678	1.45869	4.38511e-11
ENSG00000122068	FYTTD1	forty-two-three domain containing 1 [Source:HGNC Symbol;Acc:HGNC:25407]	1.80009	8.1355e-12		ENSMUSG00000022800	Fyttd1	forty-two-three domain containing 1 [Source:MGI Symbol;Acc:MGI:1917955]	1.01883	0.869809	1.15759	0.0132277	1.23958	9.20385e-06
ENSG00000106052	TAX1BP1	Tax1 (human T-cell leukemia virus type I) binding protein 1 [Source:HGNC Symbol;Acc:HGNC:11575]	1.80005	1.22996e-11		ENSMUSG00000004535	Tax1bp1	Tax1 (human T cell leukemia virus type I) binding protein 1 [Source:MGI Symbol;Acc:MGI:1289308]	1.33149	6.91473e-06	1.27194	1.66342e-05	1.23938	9.39997e-07
ENSG00000076604	TRAF4	TNF receptor-associated factor 4 [Source:HGNC Symbol;Acc:HGNC:12034]	1.79904	4.66315e-11		ENSMUSG00000017386	Traf4	TNF receptor associated factor 4 [Source:MGI Symbol;Acc:MGI:1202880]	1.14429	0.213953	1.09845	0.169806	1.48753	4.46644e-15
ENSG00000167470	MIDN	midnolin [Source:HGNC Symbol;Acc:HGNC:16298]	1.79854	4.07208e-05		ENSMUSG00000035621	Midn	midnolin [Source:MGI Symbol;Acc:MGI:1890222]	3.00922	1.60351e-26	1.92741	9.63473e-42	2.56279	1.02752e-60
ENSG00000221988	PPT2	palmitoyl-protein thioesterase 2 [Source:HGNC Symbol;Acc:HGNC:9326]	1.7985	1.06571e-05		ENSMUSG00000015474	Ppt2	palmitoyl-protein thioesterase 2 [Source:MGI Symbol;Acc:MGI:1860075]	0.666988	0.00134215	0.72985	0.0166207	0.745627	0.00371297
ENSG00000183018	SPNS2	spinster homolog 2 (Drosophila) [Source:HGNC Symbol;Acc:HGNC:26992]	1.79731	1.79215e-06		ENSMUSG00000040447	Spns2	spinster homolog 2 [Source:MGI Symbol;Acc:MGI:2384936]	1.40588	0.0115356	0.859534	0.0628048	1.63011	1.10505e-08
ENSG00000132002	DNAJB1	DnaJ (Hsp40) homolog, subfamily B, member 1 [Source:HGNC Symbol;Acc:HGNC:5270]	1.79622	9.32984e-09		ENSMUSG00000005483	Dnajb1	DnaJ (Hsp40) homolog, subfamily B, member 1 [Source:MGI Symbol;Acc:MGI:1931874]	2.18969	5.59765e-32	1.51926	1.00213e-12	1.37986	9.65809e-10
ENSG00000110330	BIRC2	baculoviral IAP repeat containing 2 [Source:HGNC Symbol;Acc:HGNC:590]	1.79521	2.39883e-08		ENSMUSG00000057367	Birc2	baculoviral IAP repeat-containing 2 [Source:MGI Symbol;Acc:MGI:1197009]	2.69505	2.19643e-12	1.47945	2.11781e-10	1.01554	0.934987
ENSG00000109171	SLAIN2	SLAIN motif family, member 2 [Source:HGNC Symbol;Acc:HGNC:29282]	1.79501	1.97064e-12		ENSMUSG00000036087	Slain2	SLAIN motif family, member 2 [Source:MGI Symbol;Acc:MGI:1923241]	0.943897	0.491791	0.994929	0.95594	1.06525	0.363681
ENSG00000136950	ARPC5L	actin related protein 2/3 complex, subunit 5-like [Source:HGNC Symbol;Acc:HGNC:23366]	1.79464	2.02157e-07		ENSMUSG00000026755	Arpc5l	actin related protein 2/3 complex, subunit 5-like [Source:MGI Symbol;Acc:MGI:1921442]	0.882934	0.21349	0.801135	0.000472249	0.94001	0.402273
ENSG00000130956	HABP4	hyaluronan binding protein 4 [Source:HGNC Symbol;Acc:HGNC:17062]	1.79307	7.08171e-10		ENSMUSG00000021476	Habp4	hyaluronic acid binding protein 4 [Source:MGI Symbol;Acc:MGI:1891713]	1.11206	0.292818	1.114	0.188105	1.18682	0.00605903
ENSG00000198604	BAZ1A	bromodomain adjacent to zinc finger domain, 1A [Source:HGNC Symbol;Acc:HGNC:960]	1.79223	9.40461e-09		ENSMUSG00000035021	Baz1a	bromodomain adjacent to zinc finger domain 1A [Source:MGI Symbol;Acc:MGI:1309478]	13.5216	1.51419e-56	4.20821	3.68378e-97	3.22356	7.29997e-49
ENSG00000146216	TTBK1	tau tubulin kinase 1 [Source:HGNC Symbol;Acc:HGNC:19140]	1.79186	1.43594e-08		ENSMUSG00000015599	Ttbk1	tau tubulin kinase 1 [Source:MGI Symbol;Acc:MGI:2147036]	1.46622	2.66904e-05	1.53093	8.83345e-16	1.69464	3.79557e-22
ENSG00000143387	CTSK	cathepsin K [Source:HGNC Symbol;Acc:HGNC:2536]	1.7917	0.000766049		ENSMUSG00000028111	Ctsk	cathepsin K [Source:MGI Symbol;Acc:MGI:107823]	2.6525	4.72963e-05	1.98667	2.67329e-07	1.0489	0.630169
ENSG00000197989	SNHG12	small nucleolar RNA host gene 12 [Source:HGNC Symbol;Acc:HGNC:30062]	1.79116	4.1243e-06		ENSMUSG00000086290	Snhg12	small nucleolar RNA host gene 12 [Source:MGI Symbol;Acc:MGI:1916721]	2.14227	3.78601e-10	2.34149	6.05631e-31	1.86445	3.30956e-17
ENSG00000133789	SWAP70	SWAP switching B-cell complex 70kDa subunit [Source:HGNC Symbol;Acc:HGNC:17070]	1.79111	3.80469e-10		ENSMUSG00000031015	Swap70	SWA-70 protein [Source:MGI Symbol;Acc:MGI:1298390]	1.04475	0.869678	1.23925	0.0140287	1.52735	6.90934e-10
ENSG00000176619	LMNB2	lamin B2 [Source:HGNC Symbol;Acc:HGNC:6638]	1.79084	1.03224e-08		ENSMUSG00000062075	Lmnb2	lamin B2 [Source:MGI Symbol;Acc:MGI:96796]	0.733395	0.00246205	0.874633	0.0612368	1.17389	0.0405062
ENSG00000189058	APOD	apolipoprotein D [Source:HGNC Symbol;Acc:HGNC:612]	1.79043	0.115048		ENSMUSG00000022548	Apod	apolipoprotein D [Source:MGI Symbol;Acc:MGI:88056]	1.28401	0.317801	0.950603	0.525124	0.988328	0.854706
ENSG00000080822	CLDND1	claudin domain containing 1 [Source:HGNC Symbol;Acc:HGNC:1322]	1.79034	2.8593e-11		ENSMUSG00000022744	Cldnd1	claudin domain containing 1 [Source:MGI Symbol;Acc:MGI:2447860]	1.73026	4.18129e-10	1.82842	9.5865e-23	1.88366	1.01349e-28
ENSG00000166949	SMAD3	SMAD family member 3 [Source:HGNC Symbol;Acc:HGNC:6769]	1.78901	4.46219e-05		ENSMUSG00000032402	Smad3	SMAD family member 3 [Source:MGI Symbol;Acc:MGI:1201674]	1.61246	1.3031e-05	1.07422	0.492157	1.43063	2.93545e-11
ENSG00000178233	TMEM151B	transmembrane protein 151B [Source:HGNC Symbol;Acc:HGNC:21315]	1.78823	1.92709e-13		ENSMUSG00000096847	Tmem151b	transmembrane protein 151B [Source:MGI Symbol;Acc:MGI:2685169]	0.684312	0.000231327	0.923028	0.252568	1.05149	0.553974
ENSG00000125775	SDCBP2	syndecan binding protein (syntenin) 2 [Source:HGNC Symbol;Acc:HGNC:15756]	1.78815	0.0227572		ENSMUSG00000027456	Sdcbp2	syndecan binding protein (syntenin) 2 [Source:MGI Symbol;Acc:MGI:2385156]	2.05901	8.01093e-05	1.45016	0.133656	1.38699	0.363623
ENSG00000154359	LONRF1	LON peptidase N-terminal domain and ring finger 1 [Source:HGNC Symbol;Acc:HGNC:26302]	1.78692	5.54748e-19		ENSMUSG00000039633	Lonrf1	LON peptidase N-terminal domain and ring finger 1 [Source:MGI Symbol;Acc:MGI:3609241]	1.67661	1.19299e-10	2.07261	8.08367e-33	1.58889	1.58087e-10
ENSG00000155380	SLC16A1	solute carrier family 16 (monocarboxylate transporter), member 1 [Source:HGNC Symbol;Acc:HGNC:10922]	1.78634	5.62784e-08		ENSMUSG00000032902	Slc16a1	solute carrier family 16 (monocarboxylic acid transporters), member 1 [Source:MGI Symbol;Acc:MGI:106013]	6.2882	3.19621e-34	4.90521	1.12943e-190	1.39034	5.33002e-10
ENSG00000173846	PLK3	polo-like kinase 3 [Source:HGNC Symbol;Acc:HGNC:2154]	1.78584	1.19209e-11		ENSMUSG00000028680	Plk3	polo-like kinase 3 [Source:MGI Symbol;Acc:MGI:109604]	2.04083	1.63715e-12	2.93867	6.67444e-63	2.43315	1.74671e-33
ENSG00000102804	TSC22D1	TSC22 domain family, member 1 [Source:HGNC Symbol;Acc:HGNC:16826]	1.7849	1.23736e-09		ENSMUSG00000022010	Tsc22d1	TSC22 domain family, member 1 [Source:MGI Symbol;Acc:MGI:109127]	1.5487	2.14565e-08	1.18187	0.000584562	1.12035	0.00866844
ENSG00000223802	CERS1	ceramide synthase 1 [Source:HGNC Symbol;Acc:HGNC:14253]	1.78479	4.77109e-07		ENSMUSG00000087408	Cers1	ceramide synthase 1 [Source:MGI Symbol;Acc:MGI:2136690]	0.790046	0.00332981	0.78732	0.00250772	0.779545	0.00470426
ENSG00000240891	PLCXD2	phosphatidylinositol-specific phospholipase C, X domain containing 2 [Source:HGNC Symbol;Acc:HGNC:26462]	1.78445	0.00444058		ENSMUSG00000087141	Plcxd2	phosphatidylinositol-specific phospholipase C, X domain containing 2 [Source:MGI Symbol;Acc:MGI:3647874]	1.33975	0.00051155	0.885034	0.0606021	1.15945	0.0157933
ENSG00000136770	DNAJC1	DnaJ (Hsp40) homolog, subfamily C, member 1 [Source:HGNC Symbol;Acc:HGNC:20090]	1.78392	4.74561e-07		ENSMUSG00000026740	Dnajc1	DnaJ (Hsp40) homolog, subfamily C, member 1 [Source:MGI Symbol;Acc:MGI:103268]	2.61702	4.93091e-22	1.78868	1.64119e-19	1.309	8.29598e-05
ENSG00000198168	SVIP	small VCP/p97-interacting protein [Source:HGNC Symbol;Acc:HGNC:25238]	1.7824	2.41783e-13		ENSMUSG00000074093	Svip	small VCP/p97-interacting protein [Source:MGI Symbol;Acc:MGI:1922994]	0.598044	0.000220565	0.485776	1.10556e-18	0.61498	2.77877e-10
ENSG00000165813	CCDC186	coiled-coil domain containing 186 [Source:HGNC Symbol;Acc:HGNC:24349]	1.78191	1.0089e-06		ENSMUSG00000035173	Ccdc186	coiled-coil domain containing 186 [Source:MGI Symbol;Acc:MGI:2445022]	1.29467	0.00228667	1.4814	2.44207e-13	1.48627	6.88615e-14
ENSG00000108829	LRRC59	leucine rich repeat containing 59 [Source:HGNC Symbol;Acc:HGNC:28817]	1.78188	1.71656e-07		ENSMUSG00000020869	Lrrc59	leucine rich repeat containing 59 [Source:MGI Symbol;Acc:MGI:2138133]	1.02125	0.883036	1.00689	0.935926	1.2704	1.20132e-07
ENSG00000120129	DUSP1	dual specificity phosphatase 1 [Source:HGNC Symbol;Acc:HGNC:3064]	1.78174	2.27987e-14		ENSMUSG00000024190	Dusp1	dual specificity phosphatase 1 [Source:MGI Symbol;Acc:MGI:105120]	19.4046	1.4791e-116	7.9255	3.83812e-274	4.96459	1.31203e-112
ENSG00000023909	GCLM	glutamate-cysteine ligase, modifier subunit [Source:HGNC Symbol;Acc:HGNC:4312]	1.78059	0.000918337		ENSMUSG00000028124	Gclm	glutamate-cysteine ligase, modifier subunit [Source:MGI Symbol;Acc:MGI:104995]	0.75652	0.000493464	0.627451	2.98285e-11	0.75868	6.12723e-06
ENSG00000109787	KLF3	Kruppel-like factor 3 (basic) [Source:HGNC Symbol;Acc:HGNC:16516]	1.78018	1.45439e-09		ENSMUSG00000029178	Klf3	Kruppel-like factor 3 (basic) [Source:MGI Symbol;Acc:MGI:1342773]	1.2542	0.0656892	1.30128	6.94035e-05	1.55385	5.55552e-19
ENSG00000125835	SNRPB	small nuclear ribonucleoprotein polypeptides B and B1 [Source:HGNC Symbol;Acc:HGNC:11153]	1.77902	6.09779e-10		ENSMUSG00000027404	Snrpb	small nuclear ribonucleoprotein B [Source:MGI Symbol;Acc:MGI:98342]	1.40863	0.00150841	1.30451	2.37281e-06	1.60306	1.25256e-20
ENSG00000087301	TXNDC16	thioredoxin domain containing 16 [Source:HGNC Symbol;Acc:HGNC:19965]	1.77886	3.82399e-05		ENSMUSG00000021830	Txndc16	thioredoxin domain containing 16 [Source:MGI Symbol;Acc:MGI:1917811]	1.88296	5.23095e-13	2.00156	2.58425e-24	1.54652	2.38603e-13
ENSG00000140403	DNAJA4	DnaJ (Hsp40) homolog, subfamily A, member 4 [Source:HGNC Symbol;Acc:HGNC:14885]	1.77799	0.00578966		ENSMUSG00000032285	Dnaja4	DnaJ (Hsp40) homolog, subfamily A, member 4 [Source:MGI Symbol;Acc:MGI:1927638]	1.17984	0.128493	1.21461	0.259939	0.944491	0.775417
ENSG00000133818	RRAS2	related RAS viral (r-ras) oncogene homolog 2 [Source:HGNC Symbol;Acc:HGNC:17271]	1.77692	1.0466e-10		ENSMUSG00000055723	Rras2	related RAS viral (r-ras) oncogene homolog 2 [Source:MGI Symbol;Acc:MGI:1914172]	0.601448	1.69218e-14	0.550965	1.19246e-21	1.3798	3.82273e-06
ENSG00000110104	CCDC86	coiled-coil domain containing 86 [Source:HGNC Symbol;Acc:HGNC:28359]	1.77677	6.14951e-10		ENSMUSG00000024732	Ccdc86	coiled-coil domain containing 86 [Source:MGI Symbol;Acc:MGI:1277220]	0.54627	1.8568e-08	0.692336	0.000551666	1.13642	0.323414
ENSG00000167397	VKORC1	vitamin K epoxide reductase complex, subunit 1 [Source:HGNC Symbol;Acc:HGNC:23663]	1.77607	1.66881e-07		ENSMUSG00000096145	Vkorc1	vitamin K epoxide reductase complex, subunit 1 [Source:MGI Symbol;Acc:MGI:106442]	1.0263	0.936976	0.851175	0.361938	0.922733	0.555764
ENSG00000168490	PHYHIP	phytanoyl-CoA 2-hydroxylase interacting protein [Source:HGNC Symbol;Acc:HGNC:16865]	1.77453	2.64991e-05		ENSMUSG00000003469	Phyhip	phytanoyl-CoA hydroxylase interacting protein [Source:MGI Symbol;Acc:MGI:1860417]	0.751753	0.0882127	0.786287	0.0490081	1.95319	1.01278e-15
ENSG00000213088	ACKR1	atypical chemokine receptor 1 (Duffy blood group) [Source:HGNC Symbol;Acc:HGNC:4035]	1.77447	0.000160415		ENSMUSG00000037872	Ackr1	atypical chemokine receptor 1 (Duffy blood group) [Source:MGI Symbol;Acc:MGI:1097689]	0.944234	0.688644	1.01531	0.932079	1.13286	0.187204
ENSG00000103056	SMPD3	sphingomyelin phosphodiesterase 3, neutral membrane (neutral sphingomyelinase II) [Source:HGNC Symbol;Acc:HGNC:14240]	1.77414	0.177923		ENSMUSG00000031906	Smpd3	sphingomyelin phosphodiesterase 3, neutral [Source:MGI Symbol;Acc:MGI:1927578]	0.790549	0.0287111	0.723127	1.21981e-08	0.817447	0.000169159
ENSG00000117155	SSX2IP	synovial sarcoma, X breakpoint 2 interacting protein [Source:HGNC Symbol;Acc:HGNC:16509]	1.7727	1.11518e-08		ENSMUSG00000036825	Ssx2ip	synovial sarcoma, X breakpoint 2 interacting protein [Source:MGI Symbol;Acc:MGI:2139150]	0.974463	0.865286	0.982235	0.816881	0.977467	0.879697
ENSG00000162733	DDR2	discoidin domain receptor tyrosine kinase 2 [Source:HGNC Symbol;Acc:HGNC:2731]	1.77233	4.13569e-05		ENSMUSG00000026674	Ddr2	discoidin domain receptor family, member 2 [Source:MGI Symbol;Acc:MGI:1345277]	1.44712	0.0725099	1.6376	2.28491e-10	1.43208	8.93824e-17
ENSG00000121879	PIK3CA	phosphatidylinositol-4,5-bisphosphate 3-kinase, catalytic subunit alpha [Source:HGNC Symbol;Acc:HGNC:8975]	1.77175	3.69503e-08		ENSMUSG00000027665	Pik3ca	phosphatidylinositol 3-kinase, catalytic, alpha polypeptide [Source:MGI Symbol;Acc:MGI:1206581]	1.04042	0.753663	1.01369	0.885501	1.15559	0.00529658
ENSG00000101134	DOK5	docking protein 5 [Source:HGNC Symbol;Acc:HGNC:16173]	1.76994	4.70227e-11		ENSMUSG00000027560	Dok5	docking protein 5 [Source:MGI Symbol;Acc:MGI:1924079]	0.840442	0.15298	0.596569	3.11185e-18	1.01982	0.927301
ENSG00000126603	GLIS2	GLIS family zinc finger 2 [Source:HGNC Symbol;Acc:HGNC:29450]	1.76954	1.351e-09		ENSMUSG00000014303	Glis2	GLIS family zinc finger 2 [Source:MGI Symbol;Acc:MGI:1932535]	0.977494	0.96402	0.845358	0.0413164	1.16779	0.0106116
ENSG00000251322	SHANK3	SH3 and multiple ankyrin repeat domains 3 [Source:HGNC Symbol;Acc:HGNC:14294]	1.76934	1.59287e-08		ENSMUSG00000022623	Shank3	SH3/ankyrin domain gene 3 [Source:MGI Symbol;Acc:MGI:1930016]	1.14938	0.213589	1.28661	6.68899e-05	1.6101	1.58318e-17
ENSG00000130208	APOC1	apolipoprotein C-I [Source:HGNC Symbol;Acc:HGNC:607]	1.76913	0.169441		ENSMUSG00000040564	Apoc1	apolipoprotein C-I [Source:MGI Symbol;Acc:MGI:88053]	1.19183	0.763177	0.934871	0.890841	1.01798	0.992179
ENSG00000169914	OTUD3	OTU deubiquitinase 3 [Source:HGNC Symbol;Acc:HGNC:29038]	1.76901	1.76177e-06		ENSMUSG00000041161	Otud3	OTU domain containing 3 [Source:MGI Symbol;Acc:MGI:1920412]	1.33094	0.00733353	1.29885	0.0124624	2.37279	2.4923e-20
ENSG00000165997	ARL5B	ADP-ribosylation factor-like 5B [Source:HGNC Symbol;Acc:HGNC:23052]	1.76869	4.32431e-07		ENSMUSG00000017418	Arl5b	ADP-ribosylation factor-like 5B [Source:MGI Symbol;Acc:MGI:1923119]	11.6103	1.46079e-82	9.47866	0	3.09866	5.23712e-92
ENSG00000213638	ADAT3	adenosine deaminase, tRNA-specific 3 [Source:HGNC Symbol;Acc:HGNC:25151]	1.76825	0.00467183		ENSMUSG00000035370	Adat3	adenosine deaminase, tRNA-specific 3 [Source:MGI Symbol;Acc:MGI:1924344]	0.701595	0.0112601	1.38817	0.0204389	1.878	6.31409e-06
ENSG00000136750	GAD2	glutamate decarboxylase 2 (pancreatic islets and brain, 65kDa) [Source:HGNC Symbol;Acc:HGNC:4093]	1.76817	3.19661e-05		ENSMUSG00000026787	Gad2	glutamic acid decarboxylase 2 [Source:MGI Symbol;Acc:MGI:95634]	1.12322	0.156047	2.58474	4.51238e-75	1.98736	1.39864e-05
ENSG00000179134	SAMD4B	sterile alpha motif domain containing 4B [Source:HGNC Symbol;Acc:HGNC:25492]	1.76694	1.11382e-08		ENSMUSG00000030602	Pak4	p21 protein (Cdc42/Rac)-activated kinase 4 [Source:MGI Symbol;Acc:MGI:1917834]	2.77011	3.10565e-25	2.09291	6.59136e-42	2.44708	2.93189e-73
ENSG00000164484	TMEM200A	transmembrane protein 200A [Source:HGNC Symbol;Acc:HGNC:21075]	1.7665	4.84963e-12		ENSMUSG00000049420	Tmem200a	transmembrane protein 200A [Source:MGI Symbol;Acc:MGI:1924470]	0.782125	0.00281893	0.62186	9.81904e-10	1.13773	0.106268
ENSG00000156232	WHAMM	WAS protein homolog associated with actin, golgi membranes and microtubules [Source:HGNC Symbol;Acc:HGNC:30493]	1.76632	1.32881e-06		ENSMUSG00000045795	Whamm	WAS protein homolog associated with actin, golgi membranes and microtubules [Source:MGI Symbol;Acc:MGI:2142282]	0.588332	1.42446e-06	0.791732	0.04308	0.9909	0.937853
ENSG00000177839	PCDHB9	protocadherin beta 9 [Source:HGNC Symbol;Acc:HGNC:8694]	1.76609	0.00157038		ENSMUSG00000048347	Pcdhb18	protocadherin beta 18 [Source:MGI Symbol;Acc:MGI:2136756]	0.727691	0.0227724	1.15166	0.167986	1.08133	0.609199
ENSG00000006194	ZNF263	zinc finger protein 263 [Source:HGNC Symbol;Acc:HGNC:13056]	1.76549	2.22245e-05		ENSMUSG00000022529	Zfp263	zinc finger protein 263 [Source:MGI Symbol;Acc:MGI:1921370]	0.680757	0.000610477	1.07525	0.353691	1.19028	0.0240598
ENSG00000100036	SLC35E4	solute carrier family 35, member E4 [Source:HGNC Symbol;Acc:HGNC:17058]	1.76392	0.000136125		ENSMUSG00000048807	Slc35e4	solute carrier family 35, member E4 [Source:MGI Symbol;Acc:MGI:2144150]	1.34166	0.00105909	0.98911	0.935064	1.35761	1.62928e-05
ENSG00000128590	DNAJB9	DnaJ (Hsp40) homolog, subfamily B, member 9 [Source:HGNC Symbol;Acc:HGNC:6968]	1.76336	5.59163e-07		ENSMUSG00000014905	Dnajb9	DnaJ (Hsp40) homolog, subfamily B, member 9 [Source:MGI Symbol;Acc:MGI:1351618]	3.35676	3.7615e-34	2.60054	2.53944e-27	2.10556	3.66584e-28
ENSG00000072364	AFF4	AF4/FMR2 family, member 4 [Source:HGNC Symbol;Acc:HGNC:17869]	1.7617	3.00376e-05		ENSMUSG00000049470	Aff4	AF4/FMR2 family, member 4 [Source:MGI Symbol;Acc:MGI:2136171]	2.10225	3.87876e-13	2.22367	3.62629e-58	1.82067	5.04872e-39
ENSG00000185122	HSF1	heat shock transcription factor 1 [Source:HGNC Symbol;Acc:HGNC:5224]	1.75946	1.9466e-09		ENSMUSG00000022556	Hsf1	heat shock factor 1 [Source:MGI Symbol;Acc:MGI:96238]	1.21578	0.00499397	1.16236	0.0516525	1.55292	1.56841e-11
ENSG00000170759	KIF5B	kinesin family member 5B [Source:HGNC Symbol;Acc:HGNC:6324]	1.75927	1.89915e-11		ENSMUSG00000006740	Kif5b	kinesin family member 5B [Source:MGI Symbol;Acc:MGI:1098268]	1.14969	0.28624	1.19117	0.00232288	1.47299	1.85842e-17
ENSG00000132680	KIAA0907	KIAA0907 [Source:HGNC Symbol;Acc:HGNC:29145]	1.75921	4.67254e-05		ENSMUSG00000028060	2810403A07Rik	RIKEN cDNA 2810403A07 gene [Source:MGI Symbol;Acc:MGI:1921450]	1.67526	3.60041e-12	1.63902	2.1579e-21	1.66601	2.31499e-27
ENSG00000133657	ATP13A3	ATPase type 13A3 [Source:HGNC Symbol;Acc:HGNC:24113]	1.75841	1.05235e-05		ENSMUSG00000022533	Atp13a3	ATPase type 13A3 [Source:MGI Symbol;Acc:MGI:2685387]	0.922242	0.546929	1.14215	0.0241025	1.60978	1.16263e-26
ENSG00000086061	DNAJA1	DnaJ (Hsp40) homolog, subfamily A, member 1 [Source:HGNC Symbol;Acc:HGNC:5229]	1.75781	3.24106e-07		ENSMUSG00000028410	Dnaja1	DnaJ (Hsp40) homolog, subfamily A, member 1 [Source:MGI Symbol;Acc:MGI:1270129]	1.17139	0.0230622	1.22575	9.09906e-05	1.16719	0.000349193
ENSG00000130340	SNX9	sorting nexin 9 [Source:HGNC Symbol;Acc:HGNC:14973]	1.75741	3.04362e-08		ENSMUSG00000002365	Snx9	sorting nexin 9 [Source:MGI Symbol;Acc:MGI:1913866]	0.989411	0.773708	1.08886	0.544364	1.60258	3.09384e-13
ENSG00000006432	MAP3K9	mitogen-activated protein kinase kinase kinase 9 [Source:HGNC Symbol;Acc:HGNC:6861]	1.757	2.02157e-07		ENSMUSG00000042724	Map3k9	mitogen-activated protein kinase kinase kinase 9 [Source:MGI Symbol;Acc:MGI:2449952]	1.03484	0.877228	1.03237	0.714966	1.02477	0.779598
ENSG00000135127	CCDC64	coiled-coil domain containing 64 [Source:HGNC Symbol;Acc:HGNC:28095]	1.75532	8.7477e-10		ENSMUSG00000041609	Ccdc64	coiled-coil domain containing 64 [Source:MGI Symbol;Acc:MGI:1922915]	0.981625	0.958468	1.16301	0.0187626	0.837525	0.00538836
ENSG00000133935	C14orf1	chromosome 14 open reading frame 1 [Source:HGNC Symbol;Acc:HGNC:1187]	1.7548	1.24713e-09		ENSMUSG00000021252	0610007P14Rik	RIKEN cDNA 0610007P14 gene [Source:MGI Symbol;Acc:MGI:1915571]	0.894109	0.129559	0.828012	0.0121831	1.04612	0.579407
ENSG00000188706	ZDHHC9	zinc finger, DHHC-type containing 9 [Source:HGNC Symbol;Acc:HGNC:18475]	1.75436	5.5738e-11		ENSMUSG00000036985	Zdhhc9	zinc finger, DHHC domain containing 9 [Source:MGI Symbol;Acc:MGI:2444393]	1.12071	0.379814	1.19998	0.0219427	1.69572	1.45197e-23
ENSG00000164924	YWHAZ	tyrosine 3-monooxygenase/tryptophan 5-monooxygenase activation protein, zeta [Source:HGNC Symbol;Acc:HGNC:12855]	1.7541	3.54442e-10		ENSMUSG00000022285	Ywhaz	tyrosine 3-monooxygenase/tryptophan 5-monooxygenase activation protein, zeta polypeptide [Source:MGI Symbol;Acc:MGI:109484]	1.20642	0.00284243	1.6955	1.74543e-24	1.42221	1.12144e-17
ENSG00000169116	PARM1	prostate androgen-regulated mucin-like protein 1 [Source:HGNC Symbol;Acc:HGNC:24536]	1.75406	0.00116935		ENSMUSG00000034981	Parm1	prostate androgen-regulated mucin-like protein 1 [Source:MGI Symbol;Acc:MGI:2443349]	0.869206	0.47858	0.896878	0.348336	0.783122	0.000164849
ENSG00000173588	CEP83	centrosomal protein 83kDa [Source:HGNC Symbol;Acc:HGNC:17966]	1.75366	1.65483e-09		ENSMUSG00000020024	Cep83	centrosomal protein 83 [Source:MGI Symbol;Acc:MGI:1924298]	2.40604	5.82542e-19	1.68366	2.55477e-17	1.55309	6.45282e-09
ENSG00000141458	NPC1	Niemann-Pick disease, type C1 [Source:HGNC Symbol;Acc:HGNC:7897]	1.75273	5.74659e-11		ENSMUSG00000024413	Npc1	Niemann-Pick type C1 [Source:MGI Symbol;Acc:MGI:1097712]	0.96265	0.829637	0.915194	0.188136	1.39951	1.22599e-10
ENSG00000105321	CCDC9	coiled-coil domain containing 9 [Source:HGNC Symbol;Acc:HGNC:24560]	1.75195	0.00015464		ENSMUSG00000041375	Ccdc9	coiled-coil domain containing 9 [Source:MGI Symbol;Acc:MGI:1921443]	1.08675	0.598467	1.45693	1.7022e-07	1.29587	0.000374278
ENSG00000174238	PITPNA	phosphatidylinositol transfer protein, alpha [Source:HGNC Symbol;Acc:HGNC:9001]	1.75186	1.13359e-11		ENSMUSG00000017781	Pitpna	phosphatidylinositol transfer protein, alpha [Source:MGI Symbol;Acc:MGI:99887]	1.28201	2.9139e-05	1.43795	1.60369e-12	1.49668	7.36613e-21
ENSG00000104419	NDRG1	N-myc downstream regulated 1 [Source:HGNC Symbol;Acc:HGNC:7679]	1.75143	0.000215343		ENSMUSG00000005125	Ndrg1	N-myc downstream regulated gene 1 [Source:MGI Symbol;Acc:MGI:1341799]	1.64531	9.94921e-09	0.475238	2.15014e-40	1.3906	4.42234e-11
ENSG00000132388	UBE2G1	ubiquitin-conjugating enzyme E2G 1 [Source:HGNC Symbol;Acc:HGNC:12482]	1.75134	3.85239e-08		ENSMUSG00000020794	Ube2g1	ubiquitin-conjugating enzyme E2G 1 [Source:MGI Symbol;Acc:MGI:1914378]	1.09593	0.312324	0.825823	0.000843185	1.18243	0.0029767
ENSG00000132950	ZMYM5	zinc finger, MYM-type 5 [Source:HGNC Symbol;Acc:HGNC:13029]	1.75067	6.66906e-05		ENSMUSG00000040123	Zmym5	zinc finger, MYM-type 5 [Source:MGI Symbol;Acc:MGI:3041170]	1.4922	4.43214e-06	1.40148	1.53081e-08	1.02053	0.804701
ENSG00000196968	FUT11	fucosyltransferase 11 (alpha (1,3) fucosyltransferase) [Source:HGNC Symbol;Acc:HGNC:19233]	1.7498	1.61385e-07		ENSMUSG00000039357	Fut11	fucosyltransferase 11 [Source:MGI Symbol;Acc:MGI:1920318]	0.959448	0.758742	1.03826	0.735635	1.19299	0.00984637
ENSG00000106245	BUD31	BUD31 homolog [Source:HGNC Symbol;Acc:HGNC:29629]	1.74923	1.80088e-06		ENSMUSG00000038722	Bud31	BUD31 homolog (yeast) [Source:MGI Symbol;Acc:MGI:2141291]	1.67552	3.6024e-07	1.21907	0.0106894	1.32031	5.77823e-06
ENSG00000128791	TWSG1	twisted gastrulation BMP signaling modulator 1 [Source:HGNC Symbol;Acc:HGNC:12429]	1.74651	9.01872e-06		ENSMUSG00000024098	Twsg1	twisted gastrulation homolog 1 (Drosophila) [Source:MGI Symbol;Acc:MGI:2137520]	0.832321	0.136743	1.01879	0.832021	1.23773	1.6056e-05
ENSG00000128585	MKLN1	muskelin 1, intracellular mediator containing kelch motifs [Source:HGNC Symbol;Acc:HGNC:7109]	1.7464	0.000137516		ENSMUSG00000025609	Mkln1	muskelin 1, intracellular mediator containing kelch motifs [Source:MGI Symbol;Acc:MGI:1351638]	1.04666	0.669634	1.1504	0.0296183	1.20064	0.000560137
ENSG00000182831	C16orf72	chromosome 16 open reading frame 72 [Source:HGNC Symbol;Acc:HGNC:30103]	1.74555	9.33771e-05		ENSMUSG00000022507	1810013L24Rik	RIKEN cDNA 1810013L24 gene [Source:MGI Symbol;Acc:MGI:1916303]	1.85049	2.84786e-08	1.6455	6.10912e-17	1.48884	8.79742e-16
ENSG00000080371	RAB21	RAB21, member RAS oncogene family [Source:HGNC Symbol;Acc:HGNC:18263]	1.745	5.85276e-07		ENSMUSG00000020132	Rab21	RAB21, member RAS oncogene family [Source:MGI Symbol;Acc:MGI:894308]	1.02713	0.898724	1.22252	0.00288309	1.06294	0.369531
ENSG00000070756	PABPC1	poly(A) binding protein, cytoplasmic 1 [Source:HGNC Symbol;Acc:HGNC:8554]	1.7443	7.95792e-08		ENSMUSG00000022283	Pabpc1	poly(A) binding protein, cytoplasmic 1 [Source:MGI Symbol;Acc:MGI:1349722]	2.03293	9.69124e-41	1.68752	1.98492e-19	1.5663	7.73076e-20
ENSG00000243335	KCTD7	potassium channel tetramerization domain containing 7 [Source:HGNC Symbol;Acc:HGNC:21957]	1.74411	2.5811e-17		ENSMUSG00000034110	Kctd7	potassium channel tetramerisation domain containing 7 [Source:MGI Symbol;Acc:MGI:2442265]	0.564317	1.75041e-10	0.485523	5.55095e-16	0.690402	1.90051e-06
ENSG00000188215	DCUN1D3	DCN1, defective in cullin neddylation 1, domain containing 3 [Source:HGNC Symbol;Acc:HGNC:28734]	1.744	2.97656e-06		ENSMUSG00000048787	Dcun1d3	DCN1, defective in cullin neddylation 1, domain containing 3 (S. cerevisiae) [Source:MGI Symbol;Acc:MGI:2679003]	2.77334	5.13349e-18	2.30246	2.03734e-43	1.36854	1.16301e-05
ENSG00000088992	TESC	tescalcin [Source:HGNC Symbol;Acc:HGNC:26065]	1.74375	6.6452e-06		ENSMUSG00000029359	Tesc	tescalcin [Source:MGI Symbol;Acc:MGI:1930803]	0.981776	0.948036	1.15331	0.727532	1.50816	0.157791
ENSG00000070761	CFAP20	cilia and flagella associated protein 20 [Source:HGNC Symbol;Acc:HGNC:29523]	1.74294	1.32274e-06		ENSMUSG00000031796	Cfap20	cilia and flagella associated protein 20 [Source:MGI Symbol;Acc:MGI:107428]	1.94969	1.23677e-12	1.39556	6.62473e-08	1.29797	3.00246e-05
ENSG00000003989	SLC7A2	solute carrier family 7 (cationic amino acid transporter, y+ system), member 2 [Source:HGNC Symbol;Acc:HGNC:11060]	1.7428	3.57384e-05		ENSMUSG00000031596	Slc7a2	solute carrier family 7 (cationic amino acid transporter, y+ system), member 2 [Source:MGI Symbol;Acc:MGI:99828]	0.758707	0.0088093	1.24303	0.00408606	1.08062	0.33078
ENSG00000213066	FGFR1OP	FGFR1 oncogene partner [Source:HGNC Symbol;Acc:HGNC:17012]	1.74229	5.97892e-10		ENSMUSG00000069135	Fgfr1op	Fgfr1 oncogene partner [Source:MGI Symbol;Acc:MGI:1922546]	1.78685	2.09883e-13	1.96009	1.81882e-27	1.73932	1.06848e-19
ENSG00000111371	SLC38A1	solute carrier family 38, member 1 [Source:HGNC Symbol;Acc:HGNC:13447]	1.74196	2.28359e-16		ENSMUSG00000023169	Slc38a1	solute carrier family 38, member 1 [Source:MGI Symbol;Acc:MGI:2145895]	1.22411	0.209935	1.37731	1.40312e-10	1.32688	4.15568e-08
ENSG00000196581	AJAP1	adherens junctions associated protein 1 [Source:HGNC Symbol;Acc:HGNC:30801]	1.7418	4.22323e-18		ENSMUSG00000039546	Ajap1	adherens junction associated protein 1 [Source:MGI Symbol;Acc:MGI:2685419]	0.654479	1.80543e-05	0.674251	1.27591e-05	1.14768	0.196134
ENSG00000150347	ARID5B	AT rich interactive domain 5B (MRF1-like) [Source:HGNC Symbol;Acc:HGNC:17362]	1.7414	0.00322444		ENSMUSG00000019947	Arid5b	AT rich interactive domain 5B (MRF1-like) [Source:MGI Symbol;Acc:MGI:2175912]	2.43336	1.1221e-19	2.79638	2.15045e-70	2.16717	1.06856e-44
ENSG00000101191	DIDO1	death inducer-obliterator 1 [Source:HGNC Symbol;Acc:HGNC:2680]	1.74102	0.000646316		ENSMUSG00000038914	Dido1	death inducer-obliterator 1 [Source:MGI Symbol;Acc:MGI:1344352]	0.850376	0.210164	1.1072	0.0705348	1.18851	0.000974745
ENSG00000110619	CARS	cysteinyl-tRNA synthetase [Source:HGNC Symbol;Acc:HGNC:1493]	1.74097	3.08887e-06		ENSMUSG00000010755	Cars	cysteinyl-tRNA synthetase [Source:MGI Symbol;Acc:MGI:1351477]	1.13878	0.173127	2.6771	3.83778e-81	1.72342	1.13785e-30
ENSG00000154447	SH3RF1	SH3 domain containing ring finger 1 [Source:HGNC Symbol;Acc:HGNC:17650]	1.74066	9.16807e-07		ENSMUSG00000031642	Sh3rf1	SH3 domain containing ring finger 1 [Source:MGI Symbol;Acc:MGI:1913066]	1.11607	0.184396	1.37762	1.89757e-09	1.03549	0.798723
ENSG00000169136	ATF5	activating transcription factor 5 [Source:HGNC Symbol;Acc:HGNC:790]	1.73982	0.000260775		ENSMUSG00000038539	Atf5	activating transcription factor 5 [Source:MGI Symbol;Acc:MGI:2141857]	1.90885	2.61213e-05	1.91383	3.70722e-22	1.54681	4.78557e-17
ENSG00000112242	E2F3	E2F transcription factor 3 [Source:HGNC Symbol;Acc:HGNC:3115]	1.73972	1.79091e-11		ENSMUSG00000016477	E2f3	E2F transcription factor 3 [Source:MGI Symbol;Acc:MGI:1096340]	0.526488	3.36737e-06	0.767027	0.000544413	0.815116	0.00689294
ENSG00000176105	YES1	YES proto-oncogene 1, Src family tyrosine kinase [Source:HGNC Symbol;Acc:HGNC:12841]	1.73946	1.74416e-07		ENSMUSG00000014932	Yes1	Yamaguchi sarcoma viral (v-yes) oncogene homolog 1 [Source:MGI Symbol;Acc:MGI:99147]	1.33281	0.0366991	1.10455	0.224279	1.20639	0.00500211
ENSG00000140157	NIPA2	non imprinted in Prader-Willi/Angelman syndrome 2 [Source:HGNC Symbol;Acc:HGNC:17044]	1.73932	4.05495e-08		ENSMUSG00000030452	Nipa2	non imprinted in Prader-Willi/Angelman syndrome 2 homolog (human) [Source:MGI Symbol;Acc:MGI:1913918]	0.958237	0.722227	0.934926	0.409373	1.14125	0.0302069
ENSG00000134697	GNL2	guanine nucleotide binding protein-like 2 (nucleolar) [Source:HGNC Symbol;Acc:HGNC:29925]	1.73891	9.58466e-06		ENSMUSG00000028869	Gnl2	guanine nucleotide binding protein-like 2 (nucleolar) [Source:MGI Symbol;Acc:MGI:2385207]	1.2188	0.0293078	1.20428	0.00123667	1.13841	0.0220532
ENSG00000071051	NCK2	NCK adaptor protein 2 [Source:HGNC Symbol;Acc:HGNC:7665]	1.7388	2.8757e-11		ENSMUSG00000066877	Nck2	non-catalytic region of tyrosine kinase adaptor protein 2 [Source:MGI Symbol;Acc:MGI:1306821]	1.30963	0.109672	1.14907	0.037503	1.59423	1.27224e-15
ENSG00000146373	RNF217	ring finger protein 217 [Source:HGNC Symbol;Acc:HGNC:21487]	1.73731	0.000225391		ENSMUSG00000063760	Rnf217	ring finger protein 217 [Source:MGI Symbol;Acc:MGI:3610311]	5.45485	6.16952e-41	5.08306	1.4303e-207	3.2577	5.32181e-16
ENSG00000083799	CYLD	cylindromatosis (turban tumor syndrome) [Source:HGNC Symbol;Acc:HGNC:2584]	1.73668	2.27914e-06		ENSMUSG00000036712	Cyld	cylindromatosis (turban tumor syndrome) [Source:MGI Symbol;Acc:MGI:1921506]	0.723644	0.00747641	0.612844	6.38651e-15	0.771126	0.000687609
ENSG00000183150	GPR19	G protein-coupled receptor 19 [Source:HGNC Symbol;Acc:HGNC:4473]	1.73664	1.15638e-07		ENSMUSG00000032641	Gpr19	G protein-coupled receptor 19 [Source:MGI Symbol;Acc:MGI:892973]	6.22144	4.41578e-79	4.62885	5.25737e-144	2.11911	8.51142e-21
ENSG00000130479	MAP1S	microtubule-associated protein 1S [Source:HGNC Symbol;Acc:HGNC:15715]	1.73645	8.71178e-06		ENSMUSG00000019261	Map1s	microtubule-associated protein 1S [Source:MGI Symbol;Acc:MGI:2443304]	0.702952	0.000152605	0.808892	0.014336	1.11782	0.119129
ENSG00000163249	CCNYL1	cyclin Y-like 1 [Source:HGNC Symbol;Acc:HGNC:26868]	1.73606	2.12722e-14		ENSMUSG00000070871	Ccnyl1	cyclin Y-like 1 [Source:MGI Symbol;Acc:MGI:2138614]	2.20048	1.13944e-24	1.64426	1.35949e-12	1.52652	5.49179e-09
ENSG00000117000	RLF	rearranged L-myc fusion [Source:HGNC Symbol;Acc:HGNC:10025]	1.73504	0.00012264		ENSMUSG00000049878	Rlf	rearranged L-myc fusion sequence [Source:MGI Symbol;Acc:MGI:1924705]	1.83764	2.72859e-07	1.65999	5.67193e-22	1.17441	0.0031688
ENSG00000103549	RNF40	ring finger protein 40, E3 ubiquitin protein ligase [Source:HGNC Symbol;Acc:HGNC:16867]	1.73501	3.64137e-05		ENSMUSG00000030816	Rnf40	ring finger protein 40 [Source:MGI Symbol;Acc:MGI:2142048]	1.52091	5.94459e-09	1.06712	0.373174	1.33898	8.80148e-09
ENSG00000169756	LIMS1	LIM and senescent cell antigen-like domains 1 [Source:HGNC Symbol;Acc:HGNC:6616]	1.73473	0.000124524		ENSMUSG00000019920	Lims1	LIM and senescent cell antigen-like domains 1 [Source:MGI Symbol;Acc:MGI:1195263]	1.24914	0.158126	1.15551	0.0367541	1.28326	2.30004e-06
ENSG00000066248	NGEF	neuronal guanine nucleotide exchange factor [Source:HGNC Symbol;Acc:HGNC:7807]	1.73438	2.08683e-06		ENSMUSG00000026259	Ngef	neuronal guanine nucleotide exchange factor [Source:MGI Symbol;Acc:MGI:1858414]	0.764129	0.00118104	1.01697	0.781455	0.801551	0.00601544
ENSG00000114745	GORASP1	golgi reassembly stacking protein 1, 65kDa [Source:HGNC Symbol;Acc:HGNC:16769]	1.73314	4.85381e-09		ENSMUSG00000032513	Gorasp1	golgi reassembly stacking protein 1 [Source:MGI Symbol;Acc:MGI:1921748]	0.668873	0.000215777	0.559169	7.14376e-13	0.821389	0.0106226
ENSG00000170852	KBTBD2	kelch repeat and BTB (POZ) domain containing 2 [Source:HGNC Symbol;Acc:HGNC:21751]	1.73284	4.81597e-10		ENSMUSG00000059486	Kbtbd2	kelch repeat and BTB (POZ) domain containing 2 [Source:MGI Symbol;Acc:MGI:2384811]	1.21533	0.00552797	1.21042	0.000605904	1.23522	0.000386064
ENSG00000180530	NRIP1	nuclear receptor interacting protein 1 [Source:HGNC Symbol;Acc:HGNC:8001]	1.73267	0.0011927		ENSMUSG00000048490	Nrip1	nuclear receptor interacting protein 1 [Source:MGI Symbol;Acc:MGI:1315213]	0.514402	6.66962e-27	0.440612	1.65675e-48	1.35222	3.51009e-07
ENSG00000166128	RAB8B	RAB8B, member RAS oncogene family [Source:HGNC Symbol;Acc:HGNC:30273]	1.73232	1.37601e-09		ENSMUSG00000036943	Rab8b	RAB8B, member RAS oncogene family [Source:MGI Symbol;Acc:MGI:2442982]	1.47851	1.02721e-07	1.02494	0.7739	1.27772	2.07009e-05
ENSG00000198873	GRK5	G protein-coupled receptor kinase 5 [Source:HGNC Symbol;Acc:HGNC:4544]	1.73227	1.04324e-11		ENSMUSG00000003228	Grk5	G protein-coupled receptor kinase 5 [Source:MGI Symbol;Acc:MGI:109161]	2.03826	3.30636e-09	2.1238	1.77763e-17	2.74024	7.47524e-46
ENSG00000144674	GOLGA4	golgin A4 [Source:HGNC Symbol;Acc:HGNC:4427]	1.73031	6.98123e-06		ENSMUSG00000038708	Golga4	golgi autoantigen, golgin subfamily a, 4 [Source:MGI Symbol;Acc:MGI:1859646]	1.29865	9.71351e-05	1.38511	9.89783e-11	1.44952	4.46443e-15
ENSG00000144909	OSBPL11	oxysterol binding protein-like 11 [Source:HGNC Symbol;Acc:HGNC:16397]	1.72952	5.41738e-07		ENSMUSG00000022807	Osbpl11	oxysterol binding protein-like 11 [Source:MGI Symbol;Acc:MGI:2146553]	0.890693	0.339831	0.887493	0.083877	1.17331	0.0155713
ENSG00000006210	CX3CL1	chemokine (C-X3-C motif) ligand 1 [Source:HGNC Symbol;Acc:HGNC:10647]	1.72937	3.19661e-05		ENSMUSG00000031778	Cx3cl1	chemokine (C-X3-C motif) ligand 1 [Source:MGI Symbol;Acc:MGI:1097153]	1.21726	0.0503996	2.04151	3.69552e-32	1.444	3.58611e-09
ENSG00000108179	PPIF	peptidylprolyl isomerase F [Source:HGNC Symbol;Acc:HGNC:9259]	1.72925	5.06433e-08		ENSMUSG00000021868	Ppif	peptidylprolyl isomerase F (cyclophilin F) [Source:MGI Symbol;Acc:MGI:2145814]	0.731235	0.00112258	0.62394	6.81471e-08	0.862248	0.0848881
ENSG00000006459	KDM7A	lysine (K)-specific demethylase 7A [Source:HGNC Symbol;Acc:HGNC:22224]	1.72888	0.000516247		ENSMUSG00000042599	Kdm7a	lysine (K)-specific demethylase 7A [Source:MGI Symbol;Acc:MGI:2443388]	7.30666	3.48626e-43	3.20188	2.95988e-80	2.25336	1.75186e-06
ENSG00000122257	RBBP6	retinoblastoma binding protein 6 [Source:HGNC Symbol;Acc:HGNC:9889]	1.72771	0.000917921		ENSMUSG00000030779	Rbbp6	retinoblastoma binding protein 6 [Source:MGI Symbol;Acc:MGI:894835]	2.00529	1.18872e-13	2.03622	4.69013e-34	1.4604	7.40124e-14
ENSG00000126261	UBA2	ubiquitin-like modifier activating enzyme 2 [Source:HGNC Symbol;Acc:HGNC:30661]	1.72725	4.28352e-14		ENSMUSG00000052997	Uba2	ubiquitin-like modifier activating enzyme 2 [Source:MGI Symbol;Acc:MGI:1858313]	0.713962	1.16778e-08	0.826077	0.0008856	0.872632	0.0082999
ENSG00000167964	RAB26	RAB26, member RAS oncogene family [Source:HGNC Symbol;Acc:HGNC:14259]	1.72717	4.9984e-09		ENSMUSG00000079657	Rab26	RAB26, member RAS oncogene family [Source:MGI Symbol;Acc:MGI:2443284]	0.834121	0.315748	1.08884	0.681987	0.936263	0.742139
ENSG00000165185	KIAA1958	KIAA1958 [Source:HGNC Symbol;Acc:HGNC:23427]	1.72627	1.72386e-05		ENSMUSG00000045071	E130308A19Rik	RIKEN cDNA E130308A19 gene [Source:MGI Symbol;Acc:MGI:2442164]	1.08538	0.651106	1.00776	0.952002	1.17323	0.0315261
ENSG00000154710	RABGEF1	RAB guanine nucleotide exchange factor (GEF) 1 [Source:HGNC Symbol;Acc:HGNC:17676]	1.72584	0.000110355		ENSMUSG00000025340	Rabgef1	RAB guanine nucleotide exchange factor (GEF) 1 [Source:MGI Symbol;Acc:MGI:1929459]	2.4828	2.41059e-38	1.6838	1.90513e-15	1.4351	8.65199e-09
ENSG00000182512	GLRX5	glutaredoxin 5 [Source:HGNC Symbol;Acc:HGNC:20134]	1.7258	3.61974e-11		ENSMUSG00000021102	Glrx5	glutaredoxin 5 homolog (S. cerevisiae) [Source:MGI Symbol;Acc:MGI:1920296]	0.96462	0.82945	0.773597	0.000827189	1.10194	0.238984
ENSG00000173120	KDM2A	lysine (K)-specific demethylase 2A [Source:HGNC Symbol;Acc:HGNC:13606]	1.72531	5.93698e-06		ENSMUSG00000054611	Kdm2a	lysine (K)-specific demethylase 2A [Source:MGI Symbol;Acc:MGI:1354736]	1.861	6.76032e-14	1.65394	1.22335e-23	1.60703	1.12753e-21
ENSG00000166025	AMOTL1	angiomotin like 1 [Source:HGNC Symbol;Acc:HGNC:17811]	1.72518	2.16432e-09		ENSMUSG00000013076	Amotl1	angiomotin-like 1 [Source:MGI Symbol;Acc:MGI:1922973]	1.24134	0.00897141	0.972955	0.756074	1.0928	0.154665
ENSG00000141522	ARHGDIA	Rho GDP dissociation inhibitor (GDI) alpha [Source:HGNC Symbol;Acc:HGNC:678]	1.72443	6.08475e-10		ENSMUSG00000025132	Arhgdia	Rho GDP dissociation inhibitor (GDI) alpha [Source:MGI Symbol;Acc:MGI:2178103]	0.963246	0.745192	0.83378	0.00067745	1.18767	3.44391e-05
ENSG00000165724	ZMYND19	zinc finger, MYND-type containing 19 [Source:HGNC Symbol;Acc:HGNC:21146]	1.72397	3.28602e-08		ENSMUSG00000026974	Zmynd19	zinc finger, MYND domain containing 19 [Source:MGI Symbol;Acc:MGI:1914437]	0.698151	3.36081e-07	0.85051	0.0301088	1.02285	0.770832
ENSG00000169926	KLF13	Kruppel-like factor 13 [Source:HGNC Symbol;Acc:HGNC:13672]	1.72347	5.59832e-13		ENSMUSG00000052040	Klf13	Kruppel-like factor 13 [Source:MGI Symbol;Acc:MGI:1354948]	0.716326	2.81902e-06	0.952551	0.546312	1.32145	1.49805e-07
ENSG00000110713	NUP98	nucleoporin 98kDa [Source:HGNC Symbol;Acc:HGNC:8068]	1.72347	1.19516e-10		ENSMUSG00000063550	Nup98	nucleoporin 98 [Source:MGI Symbol;Acc:MGI:109404]	3.79874	4.51294e-22	2.8977	3.59438e-92	2.11526	4.78938e-34
ENSG00000123352	SPATS2	spermatogenesis associated, serine-rich 2 [Source:HGNC Symbol;Acc:HGNC:18650]	1.72271	1.08527e-13		ENSMUSG00000051934	Spats2	spermatogenesis associated, serine-rich 2 [Source:MGI Symbol;Acc:MGI:1919822]	1.24832	0.00383253	0.965632	0.676769	1.18935	0.00530949
ENSG00000072133	RPS6KA6	ribosomal protein S6 kinase, 90kDa, polypeptide 6 [Source:HGNC Symbol;Acc:HGNC:10435]	1.72218	2.56646e-07		ENSMUSG00000025665	Rps6ka6	ribosomal protein S6 kinase polypeptide 6 [Source:MGI Symbol;Acc:MGI:1914321]	2.19203	1.28141e-17	2.01755	1.96779e-29	1.53315	2.91273e-12
ENSG00000134265	NAPG	N-ethylmaleimide-sensitive factor attachment protein, gamma [Source:HGNC Symbol;Acc:HGNC:7642]	1.72172	1.57738e-16		ENSMUSG00000024581	Napg	N-ethylmaleimide sensitive fusion protein attachment protein gamma [Source:MGI Symbol;Acc:MGI:104561]	0.85374	0.0121851	0.783302	5.03504e-05	0.958392	0.511566
ENSG00000112159	MDN1	midasin AAA ATPase 1 [Source:HGNC Symbol;Acc:HGNC:18302]	1.72166	0.00524927		ENSMUSG00000058006	Mdn1	midasin homolog (yeast) [Source:MGI Symbol;Acc:MGI:1926159]	1.24684	0.126792	1.16079	0.00805697	1.1672	0.0302685
ENSG00000141441	GAREM	GRB2 associated, regulator of MAPK1 [Source:HGNC Symbol;Acc:HGNC:26136]	1.72146	0.000477605		ENSMUSG00000042680	Garem	GRB2 associated, regulator of MAPK1 [Source:MGI Symbol;Acc:MGI:2685790]	1.7469	2.45864e-08	2.51026	2.78099e-48	1.95738	7.09005e-32
ENSG00000213341	CHUK	conserved helix-loop-helix ubiquitous kinase [Source:HGNC Symbol;Acc:HGNC:1974]	1.72124	2.06069e-05		ENSMUSG00000025199	Chuk	conserved helix-loop-helix ubiquitous kinase [Source:MGI Symbol;Acc:MGI:99484]	1.5663	1.3013e-05	1.4205	4.31411e-09	1.42341	8.52014e-10
ENSG00000168993	CPLX1	complexin 1 [Source:HGNC Symbol;Acc:HGNC:2309]	1.72025	3.2023e-06		ENSMUSG00000033615	Cplx1	complexin 1 [Source:MGI Symbol;Acc:MGI:104727]	0.916083	0.347983	0.782379	0.000153257	1.08133	0.184436
ENSG00000205269	TMEM170B	transmembrane protein 170B [Source:HGNC Symbol;Acc:HGNC:34244]	1.71999	1.0354e-12		ENSMUSG00000087370	Tmem170b	transmembrane protein 170B [Source:MGI Symbol;Acc:MGI:3647046]	0.8606	0.0526254	1.09757	0.118832	1.41336	3.14532e-11
ENSG00000109066	TMEM104	transmembrane protein 104 [Source:HGNC Symbol;Acc:HGNC:25984]	1.71927	4.25914e-07		ENSMUSG00000045980	Tmem104	transmembrane protein 104 [Source:MGI Symbol;Acc:MGI:2444222]	0.596199	2.07178e-09	0.581679	3.13548e-05	0.714394	0.000155686
ENSG00000196428	TSC22D2	TSC22 domain family, member 2 [Source:HGNC Symbol;Acc:HGNC:29095]	1.71918	0.000333078		ENSMUSG00000027806	Tsc22d2	TSC22 domain family, member 2 [Source:MGI Symbol;Acc:MGI:1919283]	5.68562	3.68425e-87	6.8619	0	2.35444	2.49445e-11
ENSG00000055208	TAB2	TGF-beta activated kinase 1/MAP3K7 binding protein 2 [Source:HGNC Symbol;Acc:HGNC:17075]	1.71673	1.53024e-07		ENSMUSG00000015755	Tab2	TGF-beta activated kinase 1/MAP3K7 binding protein 2 [Source:MGI Symbol;Acc:MGI:1915902]	1.32328	0.030375	1.70577	2.50889e-18	1.52345	5.23315e-22
ENSG00000108588	CCDC47	coiled-coil domain containing 47 [Source:HGNC Symbol;Acc:HGNC:24856]	1.71662	1.09968e-06		ENSMUSG00000078622	Ccdc47	coiled-coil domain containing 47 [Source:MGI Symbol;Acc:MGI:1914413]	0.981331	0.878835	1.07288	0.331524	0.959924	0.490129
ENSG00000165775	FUNDC2	FUN14 domain containing 2 [Source:HGNC Symbol;Acc:HGNC:24925]	1.71646	2.02807e-16		ENSMUSG00000031198	Fundc2	FUN14 domain containing 2 [Source:MGI Symbol;Acc:MGI:1914641]	0.946904	0.813818	0.856798	0.0777994	0.90888	0.175289
ENSG00000181026	AEN	apoptosis enhancing nuclease [Source:HGNC Symbol;Acc:HGNC:25722]	1.71634	3.81332e-05		ENSMUSG00000030609	Aen	apoptosis enhancing nuclease [Source:MGI Symbol;Acc:MGI:1915298]	0.877447	0.316696	0.747267	1.16126e-06	1.42051	3.10066e-09
ENSG00000103066	PLA2G15	phospholipase A2, group XV [Source:HGNC Symbol;Acc:HGNC:17163]	1.71532	5.22348e-06		ENSMUSG00000031903	Pla2g15	phospholipase A2, group XV [Source:MGI Symbol;Acc:MGI:2178076]	0.663283	1.02563e-07	0.531689	1.12295e-13	0.813328	0.00631895
ENSG00000210100	MT-TI	mitochondrially encoded tRNA isoleucine [Source:HGNC Symbol;Acc:HGNC:7488]	1.71464	0.328628		ENSMUSG00000064342	mt-Ti	mitochondrially encoded tRNA isoleucine [Source:MGI Symbol;Acc:MGI:102484]	1.69781	0.0496601	1.09223	0.735912	2.48792	0.0185481
ENSG00000198729	PPP1R14C	protein phosphatase 1, regulatory (inhibitor) subunit 14C [Source:HGNC Symbol;Acc:HGNC:14952]	1.71455	4.87849e-08		ENSMUSG00000040653	Ppp1r14c	protein phosphatase 1, regulatory (inhibitor) subunit 14c [Source:MGI Symbol;Acc:MGI:1923392]	1.04035	0.761206	0.898153	0.136172	0.937172	0.447048
ENSG00000109920	FNBP4	formin binding protein 4 [Source:HGNC Symbol;Acc:HGNC:19752]	1.7144	2.74155e-07		ENSMUSG00000008200	Fnbp4	formin binding protein 4 [Source:MGI Symbol;Acc:MGI:1860513]	1.9925	1.80039e-08	2.00635	3.28699e-47	1.65847	5.61158e-27
ENSG00000184007	PTP4A2	protein tyrosine phosphatase type IVA, member 2 [Source:HGNC Symbol;Acc:HGNC:9635]	1.71436	2.24547e-17		ENSMUSG00000028788	Ptp4a2	protein tyrosine phosphatase 4a2 [Source:MGI Symbol;Acc:MGI:1277117]	1.70584	6.88556e-12	1.57245	3.05156e-21	1.54608	3.54652e-18
ENSG00000153094	BCL2L11	BCL2-like 11 (apoptosis facilitator) [Source:HGNC Symbol;Acc:HGNC:994]	1.71427	0.218664		ENSMUSG00000027381	Bcl2l11	BCL2-like 11 (apoptosis facilitator) [Source:MGI Symbol;Acc:MGI:1197519]	4.96325	1.0811e-37	2.04585	9.06201e-21	1.73501	1.40889e-13
ENSG00000204618	RNF39	ring finger protein 39 [Source:HGNC Symbol;Acc:HGNC:18064]	1.71294	0.000535486		ENSMUSG00000036492	Rnf39	ring finger protein 39 [Source:MGI Symbol;Acc:MGI:2156378]	2.23744	0.00184168	1.5222	0.207718	1.16652	0.70055
ENSG00000156345	CDK20	cyclin-dependent kinase 20 [Source:HGNC Symbol;Acc:HGNC:21420]	1.71248	1.25391e-13		ENSMUSG00000021483	Cdk20	cyclin-dependent kinase 20 [Source:MGI Symbol;Acc:MGI:2145349]	1.2591	0.016585	0.660202	2.92267e-06	0.946025	0.6865
ENSG00000134758	RNF138	ring finger protein 138, E3 ubiquitin protein ligase [Source:HGNC Symbol;Acc:HGNC:17765]	1.71221	2.98641e-06		ENSMUSG00000024317	Rnf138	ring finger protein 138 [Source:MGI Symbol;Acc:MGI:1929211]	0.646349	1.14038e-09	0.754192	0.000105576	0.749466	0.00011647
ENSG00000173674	EIF1AX	eukaryotic translation initiation factor 1A, X-linked [Source:HGNC Symbol;Acc:HGNC:3250]	1.71212	6.27767e-08		ENSMUSG00000067194	Eif1ax	eukaryotic translation initiation factor 1A, X-linked [Source:MGI Symbol;Acc:MGI:1913485]	1.18138	0.00169205	1.14898	0.00746894	1.17817	0.000380511
ENSG00000277586	NEFL	neurofilament, light polypeptide [Source:HGNC Symbol;Acc:HGNC:7739]	1.71146	7.86738e-11		ENSMUSG00000022055	Nefl	neurofilament, light polypeptide [Source:MGI Symbol;Acc:MGI:97313]	2.86324	4.6085e-32	3.87138	1.29468e-16	1.94881	6.02072e-43
ENSG00000160075	SSU72	SSU72 RNA polymerase II CTD phosphatase homolog (S. cerevisiae) [Source:HGNC Symbol;Acc:HGNC:25016]	1.71036	4.24964e-10		ENSMUSG00000029038	Ssu72	Ssu72 RNA polymerase II CTD phosphatase homolog (yeast) [Source:MGI Symbol;Acc:MGI:1916241]	0.953681	0.760717	0.738573	2.74968e-05	0.789343	0.000368373
ENSG00000106346	USP42	ubiquitin specific peptidase 42 [Source:HGNC Symbol;Acc:HGNC:20068]	1.7098	3.29002e-05		ENSMUSG00000051306	Usp42	ubiquitin specific peptidase 42 [Source:MGI Symbol;Acc:MGI:1924050]	0.413781	2.59079e-38	0.654526	2.85998e-11	0.727854	1.16989e-06
ENSG00000204388	HSPA1B	heat shock 70kDa protein 1B [Source:HGNC Symbol;Acc:HGNC:5233]	1.70975	0.000524757		ENSMUSG00000090877	Hspa1b	heat shock protein 1B [Source:MGI Symbol;Acc:MGI:99517]	2.99712	5.59334e-19	1.03017	0.921119	3.16443	7.80845e-31
ENSG00000124228	DDX27	DEAD (Asp-Glu-Ala-Asp) box polypeptide 27 [Source:HGNC Symbol;Acc:HGNC:15837]	1.70882	2.86763e-09		ENSMUSG00000017999	Ddx27	DEAD (Asp-Glu-Ala-Asp) box polypeptide 27 [Source:MGI Symbol;Acc:MGI:2385884]	2.09088	2.6924e-21	1.10475	0.174294	1.16737	0.0163463
ENSG00000136868	SLC31A1	solute carrier family 31 (copper transporter), member 1 [Source:HGNC Symbol;Acc:HGNC:11016]	1.7084	4.97606e-10		ENSMUSG00000066150	Slc31a1	solute carrier family 31, member 1 [Source:MGI Symbol;Acc:MGI:1333843]	1.75505	2.75106e-08	1.60424	7.83086e-15	2.07382	9.09309e-50
ENSG00000197329	PELI1	pellino E3 ubiquitin protein ligase 1 [Source:HGNC Symbol;Acc:HGNC:8827]	1.70816	1.19976e-06		ENSMUSG00000020134	Peli1	pellino 1 [Source:MGI Symbol;Acc:MGI:1914495]	4.1276	1.46497e-37	2.731	5.64401e-72	2.09218	5.60766e-31
ENSG00000151491	EPS8	epidermal growth factor receptor pathway substrate 8 [Source:HGNC Symbol;Acc:HGNC:3420]	1.70804	9.54748e-10		ENSMUSG00000015766	Eps8	epidermal growth factor receptor pathway substrate 8 [Source:MGI Symbol;Acc:MGI:104684]	0.781593	0.00187836	0.923719	0.31633	1.37082	1.40387e-06
ENSG00000111145	ELK3	ELK3, ETS-domain protein (SRF accessory protein 2) [Source:HGNC Symbol;Acc:HGNC:3325]	1.70786	0.000112075		ENSMUSG00000008398	Elk3	ELK3, member of ETS oncogene family [Source:MGI Symbol;Acc:MGI:101762]	1.30804	0.105307	1.32075	0.00261956	0.983956	0.906159
ENSG00000121579	NAA50	N(alpha)-acetyltransferase 50, NatE catalytic subunit [Source:HGNC Symbol;Acc:HGNC:29533]	1.70712	2.06629e-07		ENSMUSG00000022698	Naa50	N(alpha)-acetyltransferase 50, NatE catalytic subunit [Source:MGI Symbol;Acc:MGI:1919367]	1.06266	0.470032	1.057	0.450956	1.15426	0.0026441
ENSG00000214517	PPME1	protein phosphatase methylesterase 1 [Source:HGNC Symbol;Acc:HGNC:30178]	1.70648	8.17023e-10		ENSMUSG00000030718	Ppme1	protein phosphatase methylesterase 1 [Source:MGI Symbol;Acc:MGI:1919840]	1.65834	1.13066e-19	1.53611	1.77125e-15	1.48661	1.43759e-17
ENSG00000131142	CCL25	chemokine (C-C motif) ligand 25 [Source:HGNC Symbol;Acc:HGNC:10624]	1.70628	0.414076		ENSMUSG00000023235	Ccl25	chemokine (C-C motif) ligand 25 [Source:MGI Symbol;Acc:MGI:1099448]	1.17133	0.278933	1.31622	0.0472952	1.18434	0.202193
ENSG00000109846	CRYAB	crystallin, alpha B [Source:HGNC Symbol;Acc:HGNC:2389]	1.70591	0.00149203		ENSMUSG00000032060	Cryab	crystallin, alpha B [Source:MGI Symbol;Acc:MGI:88516]	1.19612	0.141815	1.09168	0.544724	1.38766	2.16914e-05
ENSG00000148248	SURF4	surfeit 4 [Source:HGNC Symbol;Acc:HGNC:11476]	1.70586	7.48502e-07		ENSMUSG00000014867	Surf4	surfeit gene 4 [Source:MGI Symbol;Acc:MGI:98445]	0.981139	0.845185	1.04092	0.60884	1.35296	6.87579e-13
ENSG00000137692	DCUN1D5	DCN1, defective in cullin neddylation 1, domain containing 5 [Source:HGNC Symbol;Acc:HGNC:28409]	1.70561	5.76059e-12		ENSMUSG00000032002	Dcun1d5	DCN1, defective in cullin neddylation 1, domain containing 5 (S. cerevisiae) [Source:MGI Symbol;Acc:MGI:1924113]	1.1811	0.082093	1.17879	0.00976293	1.18097	0.00910031
ENSG00000117616	RSRP1	arginine/serine-rich protein 1 [Source:HGNC Symbol;Acc:HGNC:25234]	1.70378	9.09997e-05		ENSMUSG00000037266	Rsrp1	arginine/serine rich protein 1 [Source:MGI Symbol;Acc:MGI:106498]	0.979894	0.979798	1.44404	1.10905e-12	1.42763	5.6238e-18
ENSG00000122490	PQLC1	PQ loop repeat containing 1 [Source:HGNC Symbol;Acc:HGNC:26188]	1.70334	6.48384e-05		ENSMUSG00000034006	Pqlc1	PQ loop repeat containing 1 [Source:MGI Symbol;Acc:MGI:1914193]	2.57893	9.84496e-27	1.84795	1.86221e-20	2.63595	2.18799e-35
ENSG00000172031	EPHX4	epoxide hydrolase 4 [Source:HGNC Symbol;Acc:HGNC:23758]	1.70284	0.0203139		ENSMUSG00000033805	Ephx4	epoxide hydrolase 4 [Source:MGI Symbol;Acc:MGI:2686228]	1.03288	0.850838	0.913201	0.685311	0.88745	0.630481
ENSG00000108590	MED31	mediator complex subunit 31 [Source:HGNC Symbol;Acc:HGNC:24260]	1.70239	9.11781e-08		ENSMUSG00000020801	Med31	mediator complex subunit 31 [Source:MGI Symbol;Acc:MGI:1914529]	1.39122	0.0131173	1.16481	0.130324	1.21638	0.0938516
ENSG00000186174	BCL9L	B-cell CLL/lymphoma 9-like [Source:HGNC Symbol;Acc:HGNC:23688]	1.70228	0.000450832		ENSMUSG00000063382	Bcl9l	B cell CLL/lymphoma 9-like [Source:MGI Symbol;Acc:MGI:1933114]	1.00891	0.962298	1.14347	0.124545	1.33025	2.51187e-08
ENSG00000065154	OAT	ornithine aminotransferase [Source:HGNC Symbol;Acc:HGNC:8091]	1.70208	1.03983e-13		ENSMUSG00000030934	Oat	ornithine aminotransferase [Source:MGI Symbol;Acc:MGI:97394]	1.13069	0.442515	1.3998	1.85857e-09	1.18567	0.00017799
ENSG00000132510	KDM6B	lysine (K)-specific demethylase 6B [Source:HGNC Symbol;Acc:HGNC:29012]	1.70162	1.86696e-06		ENSMUSG00000018476	Kdm6b	KDM1 lysine (K)-specific demethylase 6B [Source:MGI Symbol;Acc:MGI:2448492]	2.2206	2.86746e-14	2.01718	1.55441e-19	1.49697	2.43542e-14
ENSG00000101445	PPP1R16B	protein phosphatase 1, regulatory subunit 16B [Source:HGNC Symbol;Acc:HGNC:15850]	1.70153	9.51579e-11		ENSMUSG00000037754	Ppp1r16b	protein phosphatase 1, regulatory (inhibitor) subunit 16B [Source:MGI Symbol;Acc:MGI:2151841]	0.98535	0.889122	1.02947	0.854781	0.92324	0.366733
ENSG00000105993	DNAJB6	DnaJ (Hsp40) homolog, subfamily B, member 6 [Source:HGNC Symbol;Acc:HGNC:14888]	1.70114	1.58724e-10		ENSMUSG00000029131	Dnajb6	DnaJ (Hsp40) homolog, subfamily B, member 6 [Source:MGI Symbol;Acc:MGI:1344381]	1.49232	7.71199e-07	1.50778	1.61088e-16	1.40865	1.24474e-11
ENSG00000125285	SOX21	SRY (sex determining region Y)-box 21 [Source:HGNC Symbol;Acc:HGNC:11197]	1.70066	1.98295e-05		ENSMUSG00000061517	Sox21	SRY (sex determining region Y)-box 21 [Source:MGI Symbol;Acc:MGI:2654070]	1.75944	0.00171902	1.59759	4.09015e-13	1.31774	0.000546479
ENSG00000030110	BAK1	BCL2-antagonist/killer 1 [Source:HGNC Symbol;Acc:HGNC:949]	1.70023	0.000115312		ENSMUSG00000057789	Bak1	BCL2-antagonist/killer 1 [Source:MGI Symbol;Acc:MGI:1097161]	1.05496	0.731652	0.873979	0.193574	0.892031	0.134831
ENSG00000008513	ST3GAL1	ST3 beta-galactoside alpha-2,3-sialyltransferase 1 [Source:HGNC Symbol;Acc:HGNC:10862]	1.69842	4.8071e-13		ENSMUSG00000013846	St3gal1	ST3 beta-galactoside alpha-2,3-sialyltransferase 1 [Source:MGI Symbol;Acc:MGI:98304]	0.60037	9.87996e-09	0.520589	1.86057e-15	1.1646	0.0161478
ENSG00000181104	F2R	coagulation factor II (thrombin) receptor [Source:HGNC Symbol;Acc:HGNC:3537]	1.69726	7.14011e-13		ENSMUSG00000048376	F2r	coagulation factor II (thrombin) receptor [Source:MGI Symbol;Acc:MGI:101802]	1.63661	2.09145e-08	1.30053	2.46892e-06	1.39724	4.98812e-09
ENSG00000066697	MSANTD3	Myb/SANT-like DNA-binding domain containing 3 [Source:HGNC Symbol;Acc:HGNC:23370]	1.69703	3.39705e-16		ENSMUSG00000039693	Msantd3	Myb/SANT-like DNA-binding domain containing 3 [Source:MGI Symbol;Acc:MGI:1913915]	0.896788	0.352823	0.804363	0.00237597	0.985385	0.911193
ENSG00000149084	HSD17B12	hydroxysteroid (17-beta) dehydrogenase 12 [Source:HGNC Symbol;Acc:HGNC:18646]	1.69689	0.00625084		ENSMUSG00000027195	Hsd17b12	hydroxysteroid (17-beta) dehydrogenase 12 [Source:MGI Symbol;Acc:MGI:1926967]	2.48914	1.25336e-48	2.92003	4.05121e-94	2.16683	8.38687e-44
ENSG00000197601	FAR1	fatty acyl CoA reductase 1 [Source:HGNC Symbol;Acc:HGNC:26222]	1.69683	3.54253e-07		ENSMUSG00000030759	Far1	fatty acyl CoA reductase 1 [Source:MGI Symbol;Acc:MGI:1914670]	1.12657	0.246853	1.15083	0.0278587	1.23212	0.000207687
ENSG00000002330	BAD	BCL2-associated agonist of cell death [Source:HGNC Symbol;Acc:HGNC:936]	1.69661	3.00225e-07		ENSMUSG00000024959	Bad	BCL2-associated agonist of cell death [Source:MGI Symbol;Acc:MGI:1096330]	1.16013	0.476325	0.891489	0.205187	1.07283	0.450485
ENSG00000105325	FZR1	fizzy/cell division cycle 20 related 1 [Source:HGNC Symbol;Acc:HGNC:24824]	1.69627	2.49191e-09		ENSMUSG00000020235	Fzr1	fizzy/cell division cycle 20 related 1 (Drosophila) [Source:MGI Symbol;Acc:MGI:1926790]	0.847951	0.176967	0.61738	1.71032e-17	0.827585	0.000233242
ENSG00000129355	CDKN2D	cyclin-dependent kinase inhibitor 2D (p19, inhibits CDK4) [Source:HGNC Symbol;Acc:HGNC:1790]	1.69587	8.97814e-11		ENSMUSG00000096472	Cdkn2d	cyclin-dependent kinase inhibitor 2D (p19, inhibits CDK4) [Source:MGI Symbol;Acc:MGI:105387]	0.677984	0.00097745	0.606187	1.45325e-10	0.856988	0.0448327
ENSG00000087495	PHACTR3	phosphatase and actin regulator 3 [Source:HGNC Symbol;Acc:HGNC:15833]	1.69563	2.90644e-09		ENSMUSG00000027525	Phactr3	phosphatase and actin regulator 3 [Source:MGI Symbol;Acc:MGI:1921439]	1.04526	0.783051	1.13853	0.0366239	0.942194	0.533296
ENSG00000131871	VIMP	VCP-interacting membrane selenoprotein [Source:HGNC Symbol;Acc:HGNC:30396]	1.69448	4.40841e-10		ENSMUSG00000075701	Vimp	VCP-interacting membrane protein [Source:MGI Symbol;Acc:MGI:95994]	0.66488	1.94841e-07	0.825349	0.0165918	1.15769	0.02938
ENSG00000118971	CCND2	cyclin D2 [Source:HGNC Symbol;Acc:HGNC:1583]	1.69439	1.22213e-05		ENSMUSG00000000184	Ccnd2	cyclin D2 [Source:MGI Symbol;Acc:MGI:88314]	1.64974	7.82266e-05	1.15018	0.00917574	1.27012	1.7714e-06
ENSG00000103061	SLC7A6OS	solute carrier family 7, member 6 opposite strand [Source:HGNC Symbol;Acc:HGNC:25807]	1.69417	3.64286e-06		ENSMUSG00000033106	Slc7a6os	solute carrier family 7, member 6 opposite strand [Source:MGI Symbol;Acc:MGI:1916951]	1.674	8.77887e-13	1.36779	0.000123085	1.17832	0.045271
ENSG00000204160	ZDHHC18	zinc finger, DHHC-type containing 18 [Source:HGNC Symbol;Acc:HGNC:20712]	1.69315	5.12823e-07		ENSMUSG00000037553	Zdhhc18	zinc finger, DHHC domain containing 18 [Source:MGI Symbol;Acc:MGI:3527792]	0.942081	0.634448	0.936917	0.503386	1.21032	0.00372039
ENSG00000173221	GLRX	glutaredoxin (thioltransferase) [Source:HGNC Symbol;Acc:HGNC:4330]	1.69209	1.49804e-06		ENSMUSG00000021591	Glrx	glutaredoxin [Source:MGI Symbol;Acc:MGI:2135625]	2.39853	5.60568e-44	2.63768	2.92318e-32	2.06687	5.62421e-26
ENSG00000124785	NRN1	neuritin 1 [Source:HGNC Symbol;Acc:HGNC:17972]	1.69151	2.43659e-17		ENSMUSG00000039114	Nrn1	neuritin 1 [Source:MGI Symbol;Acc:MGI:1915654]	9.47504	2.39904e-110	17.4415	0	2.20057	6.97425e-40
ENSG00000110422	HIPK3	homeodomain interacting protein kinase 3 [Source:HGNC Symbol;Acc:HGNC:4915]	1.69145	7.59701e-07		ENSMUSG00000027177	Hipk3	homeodomain interacting protein kinase 3 [Source:MGI Symbol;Acc:MGI:1314882]	2.12453	5.9562e-08	2.75132	1.87176e-87	1.50087	1.62018e-18
ENSG00000163558	PRKCI	protein kinase C, iota [Source:HGNC Symbol;Acc:HGNC:9404]	1.69133	7.45098e-09		ENSMUSG00000037643	Prkci	protein kinase C, iota [Source:MGI Symbol;Acc:MGI:99260]	1.00154	0.990496	1.02393	0.795652	1.19703	0.00069581
ENSG00000163629	PTPN13	protein tyrosine phosphatase, non-receptor type 13 (APO-1/CD95 (Fas)-associated phosphatase) [Source:HGNC Symbol;Acc:HGNC:9646]	1.68878	0.000176169		ENSMUSG00000034573	Ptpn13	protein tyrosine phosphatase, non-receptor type 13 [Source:MGI Symbol;Acc:MGI:103293]	1.45308	0.0114924	1.35526	5.75593e-07	1.18865	0.00265123
ENSG00000168502	MTCL1	microtubule crosslinking factor 1 [Source:HGNC Symbol;Acc:HGNC:29121]	1.68855	0.00120086		ENSMUSG00000052105	Mtcl1	microtubule crosslinking factor 1 [Source:MGI Symbol;Acc:MGI:1915867]	1.02244	0.897438	1.30232	3.98657e-05	2.61967	1.153e-44
ENSG00000239305	RNF103	ring finger protein 103 [Source:HGNC Symbol;Acc:HGNC:12859]	1.68781	0.000168875		ENSMUSG00000052656	Rnf103	ring finger protein 103 [Source:MGI Symbol;Acc:MGI:109483]	1.07061	0.55965	1.1635	0.0152929	1.19452	0.00611113
ENSG00000060762	MPC1	mitochondrial pyruvate carrier 1 [Source:HGNC Symbol;Acc:HGNC:21606]	1.68777	8.12636e-06		ENSMUSG00000023861	Mpc1	mitochondrial pyruvate carrier 1 [Source:MGI Symbol;Acc:MGI:1915240]	1.22096	0.00922609	1.27132	0.00130157	1.13571	0.147798
ENSG00000104825	NFKBIB	nuclear factor of kappa light polypeptide gene enhancer in B-cells inhibitor, beta [Source:HGNC Symbol;Acc:HGNC:7798]	1.68735	7.82356e-05		ENSMUSG00000030595	Nfkbib	nuclear factor of kappa light polypeptide gene enhancer in B cells inhibitor, beta [Source:MGI Symbol;Acc:MGI:104752]	1.91167	4.46796e-11	1.62288	5.99859e-09	1.47733	1.48313e-06
ENSG00000139767	SRRM4	serine/arginine repetitive matrix 4 [Source:HGNC Symbol;Acc:HGNC:29389]	1.68731	0.00676015		ENSMUSG00000063919	Srrm4	serine/arginine repetitive matrix 4 [Source:MGI Symbol;Acc:MGI:1916205]	2.1241	4.92681e-11	1.7138	1.18492e-16	2.03022	1.22533e-29
ENSG00000139636	LMBR1L	limb development membrane protein 1-like [Source:HGNC Symbol;Acc:HGNC:18268]	1.6872	3.84526e-07		ENSMUSG00000022999	Lmbr1l	limb region 1 like [Source:MGI Symbol;Acc:MGI:1289247]	2.41192	2.83584e-22	2.24505	2.49696e-45	1.76587	2.47672e-16
ENSG00000172939	OXSR1	oxidative stress responsive 1 [Source:HGNC Symbol;Acc:HGNC:8508]	1.6862	1.51941e-07		ENSMUSG00000036737	Oxsr1	oxidative-stress responsive 1 [Source:MGI Symbol;Acc:MGI:1917378]	1.30866	0.00744861	1.30018	8.51042e-06	1.08946	0.17494
ENSG00000007944	MYLIP	myosin regulatory light chain interacting protein [Source:HGNC Symbol;Acc:HGNC:21155]	1.68488	3.76371e-06		ENSMUSG00000038175	Mylip	myosin regulatory light chain interacting protein [Source:MGI Symbol;Acc:MGI:2388271]	1.01065	0.978897	1.69485	2.78983e-08	1.5285	4.97164e-11
ENSG00000170836	PPM1D	protein phosphatase, Mg2+/Mn2+ dependent, 1D [Source:HGNC Symbol;Acc:HGNC:9277]	1.68396	6.55465e-08		ENSMUSG00000020525	Ppm1d	protein phosphatase 1D magnesium-dependent, delta isoform [Source:MGI Symbol;Acc:MGI:1858214]	2.31148	4.88101e-27	2.28078	1.31622e-38	1.79977	4.21876e-16
ENSG00000198380	GFPT1	glutamine--fructose-6-phosphate transaminase 1 [Source:HGNC Symbol;Acc:HGNC:4241]	1.68396	2.03798e-16		ENSMUSG00000029992	Gfpt1	glutamine fructose-6-phosphate transaminase 1 [Source:MGI Symbol;Acc:MGI:95698]	0.92016	0.443942	1.02645	0.735635	1.26439	1.1538e-07
ENSG00000152484	USP12	ubiquitin specific peptidase 12 [Source:HGNC Symbol;Acc:HGNC:20485]	1.68319	9.69498e-08		ENSMUSG00000029640	Usp12	ubiquitin specific peptidase 12 [Source:MGI Symbol;Acc:MGI:1270128]	1.11053	0.134156	0.952816	0.557616	1.32531	2.68948e-07
ENSG00000110697	PITPNM1	phosphatidylinositol transfer protein, membrane-associated 1 [Source:HGNC Symbol;Acc:HGNC:9003]	1.68278	8.73667e-06		ENSMUSG00000024851	Pitpnm1	phosphatidylinositol transfer protein, membrane-associated 1 [Source:MGI Symbol;Acc:MGI:1197524]	1.08252	0.587497	1.24984	4.51721e-05	1.31876	5.06208e-08
ENSG00000143384	MCL1	myeloid cell leukemia 1 [Source:HGNC Symbol;Acc:HGNC:6943]	1.68208	1.76571e-08		ENSMUSG00000038612	Mcl1	myeloid cell leukemia sequence 1 [Source:MGI Symbol;Acc:MGI:101769]	2.33482	1.75755e-35	1.71081	6.72531e-20	1.82019	4.85897e-42
ENSG00000172985	SH3RF3	SH3 domain containing ring finger 3 [Source:HGNC Symbol;Acc:HGNC:24699]	1.6813	9.71896e-07		ENSMUSG00000037990	Sh3rf3	SH3 domain containing ring finger 3 [Source:MGI Symbol;Acc:MGI:2444637]	1.11814	0.320015	1.5881	6.92771e-17	1.2479	0.0326509
ENSG00000143256	PFDN2	prefoldin subunit 2 [Source:HGNC Symbol;Acc:HGNC:8867]	1.68111	8.56551e-10		ENSMUSG00000006412	Pfdn2	prefoldin 2 [Source:MGI Symbol;Acc:MGI:1276111]	1.49407	6.97828e-07	1.15735	0.111918	1.25113	0.000366545
ENSG00000143774	GUK1	guanylate kinase 1 [Source:HGNC Symbol;Acc:HGNC:4693]	1.68037	1.6811e-09		ENSMUSG00000020444	Guk1	guanylate kinase 1 [Source:MGI Symbol;Acc:MGI:95871]	1.12483	0.176827	0.787356	0.00241485	0.978106	0.742759
ENSG00000106803	SEC61B	Sec61 beta subunit [Source:HGNC Symbol;Acc:HGNC:16993]	1.67912	1.77384e-09		ENSMUSG00000053317	Sec61b	Sec61 beta subunit [Source:MGI Symbol;Acc:MGI:1913462]	1.61103	9.37851e-07	1.42235	4.5449e-06	1.28819	0.000129506
ENSG00000120694	HSPH1	heat shock 105kDa/110kDa protein 1 [Source:HGNC Symbol;Acc:HGNC:16969]	1.67899	2.61149e-05		ENSMUSG00000029657	Hsph1	heat shock 105kDa/110kDa protein 1 [Source:MGI Symbol;Acc:MGI:105053]	1.42424	9.14508e-10	1.24885	0.000163317	1.02042	0.778451
ENSG00000086619	ERO1B	endoplasmic reticulum oxidoreductase beta [Source:HGNC Symbol;Acc:HGNC:14355]	1.67871	2.79685e-05		ENSMUSG00000057069	Ero1lb	ERO1-like beta (S. cerevisiae) [Source:MGI Symbol;Acc:MGI:1914725]	2.35289	2.28481e-13	2.49652	3.09834e-32	1.36589	0.0256419
ENSG00000002834	LASP1	LIM and SH3 protein 1 [Source:HGNC Symbol;Acc:HGNC:6513]	1.67849	1.2861e-06		ENSMUSG00000038366	Lasp1	LIM and SH3 protein 1 [Source:MGI Symbol;Acc:MGI:109656]	1.18082	0.0178637	0.875243	0.0135716	1.29711	5.4517e-09
ENSG00000105281	SLC1A5	solute carrier family 1 (neutral amino acid transporter), member 5 [Source:HGNC Symbol;Acc:HGNC:10943]	1.67749	0.0233152		ENSMUSG00000001918	Slc1a5	solute carrier family 1 (neutral amino acid transporter), member 5 [Source:MGI Symbol;Acc:MGI:105305]	1.43281	0.0719796	1.06725	0.841153	1.40326	0.0721812
ENSG00000132872	SYT4	synaptotagmin IV [Source:HGNC Symbol;Acc:HGNC:11512]	1.67722	5.20547e-09		ENSMUSG00000024261	Syt4	synaptotagmin IV [Source:MGI Symbol;Acc:MGI:101759]	4.7351	1.37317e-78	4.68798	4.16194e-246	3.37164	8.94744e-18
ENSG00000108262	GIT1	G protein-coupled receptor kinase interacting ArfGAP 1 [Source:HGNC Symbol;Acc:HGNC:4272]	1.67649	5.0878e-10		ENSMUSG00000011877	Git1	G protein-coupled receptor kinase-interactor 1 [Source:MGI Symbol;Acc:MGI:1927140]	1.36363	0.000394756	1.28697	6.93405e-07	1.63692	1.6708e-30
ENSG00000198060	2005-03-01	membrane-associated ring finger (C3HC4) 5 [Source:HGNC Symbol;Acc:HGNC:26025]	1.67641	3.53032e-11		ENSMUSG00000023307	2005-03-01	membrane-associated ring finger (C3HC4) 5 [Source:MGI Symbol;Acc:MGI:1915207]	1.1814	0.00600322	1.1061	0.212541	1.19382	0.000729229
ENSG00000109320	NFKB1	nuclear factor of kappa light polypeptide gene enhancer in B-cells 1 [Source:HGNC Symbol;Acc:HGNC:7794]	1.67629	1.12619e-11		ENSMUSG00000028163	Nfkb1	nuclear factor of kappa light polypeptide gene enhancer in B cells 1, p105 [Source:MGI Symbol;Acc:MGI:97312]	2.34948	4.51546e-17	1.51719	4.63667e-09	1.34158	1.52701e-05
ENSG00000145703	IQGAP2	IQ motif containing GTPase activating protein 2 [Source:HGNC Symbol;Acc:HGNC:6111]	1.67596	0.00112404		ENSMUSG00000021676	Iqgap2	IQ motif containing GTPase activating protein 2 [Source:MGI Symbol;Acc:MGI:2449975]	1.23958	0.290779	1.69136	1.48486e-11	1.8533	1.41373e-15
ENSG00000175215	CTDSP2	CTD (carboxy-terminal domain, RNA polymerase II, polypeptide A) small phosphatase 2 [Source:HGNC Symbol;Acc:HGNC:17077]	1.67562	5.29164e-07		ENSMUSG00000078429	Ctdsp2	CTD (carboxy-terminal domain, RNA polymerase II, polypeptide A) small phosphatase 2 [Source:MGI Symbol;Acc:MGI:1098748]	1.58866	4.09636e-11	1.2716	0.000351921	1.56343	8.56638e-27
ENSG00000162522	KIAA1522	KIAA1522 [Source:HGNC Symbol;Acc:HGNC:29301]	1.67522	4.90929e-10		ENSMUSG00000050390	C77080	expressed sequence C77080 [Source:MGI Symbol;Acc:MGI:2140651]	1.00327	0.976848	1.26773	0.0582236	1.10836	0.186336
ENSG00000067369	TP53BP1	tumor protein p53 binding protein 1 [Source:HGNC Symbol;Acc:HGNC:11999]	1.6752	6.75511e-05		ENSMUSG00000043909	Trp53bp1	transformation related protein 53 binding protein 1 [Source:MGI Symbol;Acc:MGI:1351320]	1.0121	0.938341	1.23518	1.64361e-05	1.08672	0.114672
ENSG00000180694	TMEM64	transmembrane protein 64 [Source:HGNC Symbol;Acc:HGNC:25441]	1.67438	1.07321e-06		ENSMUSG00000043252	Tmem64	transmembrane protein 64 [Source:MGI Symbol;Acc:MGI:2140359]	0.955428	0.719616	1.09475	0.289138	1.57024	4.49607e-20
ENSG00000135404	CD63	CD63 molecule [Source:HGNC Symbol;Acc:HGNC:1692]	1.67371	1.27948e-09		ENSMUSG00000025351	Cd63	CD63 antigen [Source:MGI Symbol;Acc:MGI:99529]	2.13445	1.02548e-12	1.42722	2.87397e-08	1.36148	1.292e-12
ENSG00000034677	RNF19A	ring finger protein 19A, RBR E3 ubiquitin protein ligase [Source:HGNC Symbol;Acc:HGNC:13432]	1.67279	3.64286e-06		ENSMUSG00000022280	Rnf19a	ring finger protein 19A [Source:MGI Symbol;Acc:MGI:1353623]	1.94149	2.1992e-08	1.37081	1.74607e-08	0.94872	0.446747
ENSG00000198915	RASGEF1A	RasGEF domain family, member 1A [Source:HGNC Symbol;Acc:HGNC:24246]	1.67274	0.0010051		ENSMUSG00000030134	Rasgef1a	RasGEF domain family, member 1A [Source:MGI Symbol;Acc:MGI:1917977]	0.8669	0.138626	0.818494	0.0547219	0.776619	0.0157515
ENSG00000147548	WHSC1L1	Wolf-Hirschhorn syndrome candidate 1-like 1 [Source:HGNC Symbol;Acc:HGNC:12767]	1.67239	1.68953e-05		ENSMUSG00000054823	Whsc1l1	Wolf-Hirschhorn syndrome candidate 1-like 1 (human) [Source:MGI Symbol;Acc:MGI:2142581]	1.63105	2.83842e-09	1.59798	8.76363e-15	1.38143	7.80752e-10
ENSG00000065989	PDE4A	phosphodiesterase 4A, cAMP-specific [Source:HGNC Symbol;Acc:HGNC:8780]	1.67213	6.63963e-14		ENSMUSG00000032177	Pde4a	phosphodiesterase 4A, cAMP specific [Source:MGI Symbol;Acc:MGI:99558]	0.744527	0.000889447	0.886203	0.322137	0.636873	5.52553e-14
ENSG00000111450	STX2	syntaxin 2 [Source:HGNC Symbol;Acc:HGNC:3403]	1.67156	1.45471e-16		ENSMUSG00000029428	Stx2	syntaxin 2 [Source:MGI Symbol;Acc:MGI:108059]	0.731429	0.00140921	0.831251	0.0219465	0.878655	0.0756662
ENSG00000136603	SKIL	SKI-like proto-oncogene [Source:HGNC Symbol;Acc:HGNC:10897]	1.67151	4.5945e-06		ENSMUSG00000027660	Skil	SKI-like [Source:MGI Symbol;Acc:MGI:106203]	2.85631	3.66426e-34	3.2927	2.30919e-83	1.50175	9.56055e-12
ENSG00000100503	NIN	ninein (GSK3B interacting protein) [Source:HGNC Symbol;Acc:HGNC:14906]	1.67136	5.8311e-05		ENSMUSG00000021068	Nin	ninein [Source:MGI Symbol;Acc:MGI:105108]	0.944424	0.759917	1.02803	0.779185	1.39269	7.56342e-07
ENSG00000170776	AKAP13	A kinase (PRKA) anchor protein 13 [Source:HGNC Symbol;Acc:HGNC:371]	1.67116	0.000642698		ENSMUSG00000066406	Akap13	A kinase (PRKA) anchor protein 13 [Source:MGI Symbol;Acc:MGI:2676556]	1.90588	1.47281e-10	1.58377	6.53421e-15	1.3954	1.42045e-10
ENSG00000169981	ZNF35	zinc finger protein 35 [Source:HGNC Symbol;Acc:HGNC:13099]	1.67083	0.000105595		ENSMUSG00000057895	Zfp105	zinc finger protein 105 [Source:MGI Symbol;Acc:MGI:1277119]	0.44518	0.000764086	0.486085	9.11041e-10	0.563084	1.02815e-07
ENSG00000144426	NBEAL1	neurobeachin-like 1 [Source:HGNC Symbol;Acc:HGNC:20681]	1.67034	0.0264182		ENSMUSG00000073664	Nbeal1	neurobeachin like 1 [Source:MGI Symbol;Acc:MGI:2444343]	1.23649	0.279259	1.04702	0.587554	1.10031	0.208875
ENSG00000104976	SNAPC2	small nuclear RNA activating complex, polypeptide 2, 45kDa [Source:HGNC Symbol;Acc:HGNC:11135]	1.66994	3.59051e-06		ENSMUSG00000011837	Snapc2	small nuclear RNA activating complex, polypeptide 2 [Source:MGI Symbol;Acc:MGI:1914861]	1.17487	0.119326	0.76468	0.000194989	0.903693	0.206136
ENSG00000141867	BRD4	bromodomain containing 4 [Source:HGNC Symbol;Acc:HGNC:13575]	1.66914	3.71937e-05		ENSMUSG00000024002	Brd4	bromodomain containing 4 [Source:MGI Symbol;Acc:MGI:1888520]	2.30721	1.44337e-25	2.43475	1.65517e-51	1.77919	2.00068e-24
ENSG00000167657	DAPK3	death-associated protein kinase 3 [Source:HGNC Symbol;Acc:HGNC:2676]	1.66904	1.4765e-05		ENSMUSG00000034974	Dapk3	death-associated protein kinase 3 [Source:MGI Symbol;Acc:MGI:1203520]	0.978765	0.906172	0.925267	0.444109	1.03095	0.763668
ENSG00000128595	CALU	calumenin [Source:HGNC Symbol;Acc:HGNC:1458]	1.66901	8.1734e-18		ENSMUSG00000029767	Calu	calumenin [Source:MGI Symbol;Acc:MGI:1097158]	1.91506	1.15654e-25	1.57815	1.36468e-18	1.51573	5.59292e-25
ENSG00000099617	EFNA2	ephrin-A2 [Source:HGNC Symbol;Acc:HGNC:3222]	1.66883	6.59338e-06		ENSMUSG00000003070	Efna2	ephrin A2 [Source:MGI Symbol;Acc:MGI:102707]	0.566424	6.2942e-07	0.451273	1.98455e-21	0.654951	8.82091e-06
ENSG00000184384	MAML2	mastermind-like 2 (Drosophila) [Source:HGNC Symbol;Acc:HGNC:16259]	1.66845	0.0022244		ENSMUSG00000031925	Maml2	mastermind like 2 (Drosophila) [Source:MGI Symbol;Acc:MGI:2389460]	1.08696	0.864252	1.28824	0.00160384	1.21457	0.01196
ENSG00000213694	S1PR3	sphingosine-1-phosphate receptor 3 [Source:HGNC Symbol;Acc:HGNC:3167]	1.66777	9.42283e-08		ENSMUSG00000067586	S1pr3	sphingosine-1-phosphate receptor 3 [Source:MGI Symbol;Acc:MGI:1339365]	4.57318	1.15482e-19	1.3911	0.00299991	2.84518	1.5792e-105
ENSG00000196323	ZBTB44	zinc finger and BTB domain containing 44 [Source:HGNC Symbol;Acc:HGNC:25001]	1.66741	0.000141288		ENSMUSG00000047412	Zbtb44	zinc finger and BTB domain containing 44 [Source:MGI Symbol;Acc:MGI:1925123]	1.40606	0.00134135	0.952883	0.617261	1.43228	4.5562e-06
ENSG00000185634	SHC4	SHC (Src homology 2 domain containing) family, member 4 [Source:HGNC Symbol;Acc:HGNC:16743]	1.66706	4.46898e-06		ENSMUSG00000035109	Shc4	SHC (Src homology 2 domain containing) family, member 4 [Source:MGI Symbol;Acc:MGI:2655364]	2.90066	1.10339e-22	1.66598	1.29228e-07	1.04177	0.77426
ENSG00000175040	CHST2	carbohydrate (N-acetylglucosamine-6-O) sulfotransferase 2 [Source:HGNC Symbol;Acc:HGNC:1970]	1.66691	2.13061e-16		ENSMUSG00000033350	Chst2	carbohydrate sulfotransferase 2 [Source:MGI Symbol;Acc:MGI:1891160]	0.938687	0.624428	1.08032	0.207408	0.920248	0.153419
ENSG00000164951	PDP1	pyruvate dehyrogenase phosphatase catalytic subunit 1 [Source:HGNC Symbol;Acc:HGNC:9279]	1.66677	2.41599e-06		ENSMUSG00000049225	Pdp1	pyruvate dehyrogenase phosphatase catalytic subunit 1 [Source:MGI Symbol;Acc:MGI:2685870]	1.08793	0.36963	0.902235	0.0986801	2.32424	7.52801e-66
ENSG00000175581	MRPL48	mitochondrial ribosomal protein L48 [Source:HGNC Symbol;Acc:HGNC:16653]	1.66529	8.35662e-08		ENSMUSG00000030706	Mrpl48	mitochondrial ribosomal protein L48 [Source:MGI Symbol;Acc:MGI:1289321]	0.951933	0.759479	0.872069	0.108794	0.835963	0.0299725
ENSG00000174021	GNG5	guanine nucleotide binding protein (G protein), gamma 5 [Source:HGNC Symbol;Acc:HGNC:4408]	1.66518	0.000132173		ENSMUSG00000068523	Gng5	guanine nucleotide binding protein (G protein), gamma 5 [Source:MGI Symbol;Acc:MGI:109164]	1.7764	7.29963e-10	1.08299	0.405552	1.30009	4.03474e-05
ENSG00000113328	CCNG1	cyclin G1 [Source:HGNC Symbol;Acc:HGNC:1592]	1.66499	1.81674e-10		ENSMUSG00000020326	Ccng1	cyclin G1 [Source:MGI Symbol;Acc:MGI:102890]	1.09554	0.47902	0.927893	0.267779	1.27473	1.23602e-07
ENSG00000010278	CD9	CD9 molecule [Source:HGNC Symbol;Acc:HGNC:1709]	1.66491	0.00103377		ENSMUSG00000030342	Cd9	CD9 antigen [Source:MGI Symbol;Acc:MGI:88348]	1.9978	3.97889e-14	1.28895	9.09742e-05	1.78372	1.70343e-32
ENSG00000265808	SEC22B	SEC22 vesicle trafficking protein homolog B (S. cerevisiae) (gene/pseudogene) [Source:HGNC Symbol;Acc:HGNC:10700]	1.66485	3.19899e-07		ENSMUSG00000027879	Sec22b	SEC22 vesicle trafficking protein homolog B (S. cerevisiae) [Source:MGI Symbol;Acc:MGI:1338759]	1.10274	0.235319	1.08288	0.354526	1.10872	0.0641224
ENSG00000133110	POSTN	periostin, osteoblast specific factor [Source:HGNC Symbol;Acc:HGNC:16953]	1.66446	0.0500784		ENSMUSG00000027750	Postn	periostin, osteoblast specific factor [Source:MGI Symbol;Acc:MGI:1926321]	1.1802	0.366202	1.21036	0.0055314	1.18173	0.000255531
ENSG00000101384	JAG1	jagged 1 [Source:HGNC Symbol;Acc:HGNC:6188]	1.66293	1.03741e-08		ENSMUSG00000027276	Jag1	jagged 1 [Source:MGI Symbol;Acc:MGI:1095416]	1.42414	0.187196	1.65822	4.7286e-15	1.28697	8.3417e-05
ENSG00000135318	NT5E	5'-nucleotidase, ecto (CD73) [Source:HGNC Symbol;Acc:HGNC:8021]	1.66289	0.00166294		ENSMUSG00000032420	Nt5e	5' nucleotidase, ecto [Source:MGI Symbol;Acc:MGI:99782]	0.952229	0.843253	1.05901	0.830686	1.60814	2.42555e-13
ENSG00000095787	WAC	WW domain containing adaptor with coiled-coil [Source:HGNC Symbol;Acc:HGNC:17327]	1.66259	2.73013e-07		ENSMUSG00000024283	Wac	WW domain containing adaptor with coiled-coil [Source:MGI Symbol;Acc:MGI:2387357]	1.27899	0.00274279	1.8898	4.08686e-18	1.41257	1.05135e-13
ENSG00000197747	S100A10	S100 calcium binding protein A10 [Source:HGNC Symbol;Acc:HGNC:10487]	1.66235	3.9704e-05		ENSMUSG00000041959	S100a10	S100 calcium binding protein A10 (calpactin) [Source:MGI Symbol;Acc:MGI:1339468]	1.04654	0.776001	1.05048	0.761129	1.27538	4.80508e-05
ENSG00000111647	UHRF1BP1L	UHRF1 binding protein 1-like [Source:HGNC Symbol;Acc:HGNC:29102]	1.6617	6.2917e-07		ENSMUSG00000019951	Uhrf1bp1l	UHRF1 (ICBP90) binding protein 1-like [Source:MGI Symbol;Acc:MGI:2442888]	1.21369	0.0617863	1.46646	5.2936e-13	1.39381	4.86497e-09
ENSG00000160877	NACC1	nucleus accumbens associated 1, BEN and BTB (POZ) domain containing [Source:HGNC Symbol;Acc:HGNC:20967]	1.66146	1.04426e-06		ENSMUSG00000001910	Nacc1	nucleus accumbens associated 1, BEN and BTB (POZ) domain containing [Source:MGI Symbol;Acc:MGI:1914080]	0.855466	0.111265	0.92639	0.259695	1.09957	0.0820767
ENSG00000186432	KPNA4	karyopherin alpha 4 (importin alpha 3) [Source:HGNC Symbol;Acc:HGNC:6397]	1.66106	5.61124e-07		ENSMUSG00000027782	Kpna4	karyopherin (importin) alpha 4 [Source:MGI Symbol;Acc:MGI:1100848]	1.91356	5.89368e-19	1.31507	3.27783e-07	1.23293	1.35187e-05
ENSG00000063978	RNF4	ring finger protein 4 [Source:HGNC Symbol;Acc:HGNC:10067]	1.66105	9.78623e-07		ENSMUSG00000029110	Rnf4	ring finger protein 4 [Source:MGI Symbol;Acc:MGI:1201691]	1.66679	7.67592e-09	1.51805	2.86885e-13	1.48471	1.70552e-15
ENSG00000138660	AP1AR	adaptor-related protein complex 1 associated regulatory protein [Source:HGNC Symbol;Acc:HGNC:28808]	1.66056	2.46962e-08		ENSMUSG00000074238	Ap1ar	adaptor-related protein complex 1 associated regulatory protein [Source:MGI Symbol;Acc:MGI:2384822]	0.927857	0.343602	0.837792	0.00529222	0.949232	0.466954
ENSG00000174010	KLHL15	kelch-like family member 15 [Source:HGNC Symbol;Acc:HGNC:29347]	1.66035	0.00110537		ENSMUSG00000043929	Klhl15	kelch-like 15 [Source:MGI Symbol;Acc:MGI:1923400]	2.65167	2.09439e-16	2.10037	3.95326e-25	1.19881	0.0719466
ENSG00000112541	PDE10A	phosphodiesterase 10A [Source:HGNC Symbol;Acc:HGNC:8772]	1.65991	3.73227e-05		ENSMUSG00000023868	Pde10a	phosphodiesterase 10A [Source:MGI Symbol;Acc:MGI:1345143]	1.02579	0.920038	1.68862	9.79613e-16	1.62778	2.95973e-14
ENSG00000129657	SEC14L1	SEC14-like lipid binding 1 [Source:HGNC Symbol;Acc:HGNC:10698]	1.65989	4.29924e-07		ENSMUSG00000020823	Sec14l1	SEC14-like 1 (S. cerevisiae) [Source:MGI Symbol;Acc:MGI:1921386]	1.2754	0.00989542	1.33086	7.04861e-08	1.31339	4.94609e-09
ENSG00000159082	SYNJ1	synaptojanin 1 [Source:HGNC Symbol;Acc:HGNC:11503]	1.65917	1.9725e-07		ENSMUSG00000022973	Synj1	synaptojanin 1 [Source:MGI Symbol;Acc:MGI:1354961]	0.969951	0.77748	1.08544	0.201488	0.975592	0.695941
ENSG00000182199	SHMT2	serine hydroxymethyltransferase 2 (mitochondrial) [Source:HGNC Symbol;Acc:HGNC:10852]	1.65906	0.000312635		ENSMUSG00000025403	Shmt2	serine hydroxymethyltransferase 2 (mitochondrial) [Source:MGI Symbol;Acc:MGI:1277989]	1.39109	0.00841251	1.93127	2.15575e-29	1.25265	0.000123158
ENSG00000168066	SF1	splicing factor 1 [Source:HGNC Symbol;Acc:HGNC:12950]	1.65899	0.000852229		ENSMUSG00000024949	Sf1	splicing factor 1 [Source:MGI Symbol;Acc:MGI:1095403]	2.50593	4.95198e-20	2.40018	4.82107e-65	1.81539	2.85743e-35
ENSG00000175155	YPEL2	yippee-like 2 [Source:HGNC Symbol;Acc:HGNC:18326]	1.65896	0.00921572		ENSMUSG00000018427	Ypel2	yippee-like 2 (Drosophila) [Source:MGI Symbol;Acc:MGI:1925114]	0.876542	0.342331	1.34038	0.00248843	1.04576	0.730623
ENSG00000088256	GNA11	guanine nucleotide binding protein (G protein), alpha 11 (Gq class) [Source:HGNC Symbol;Acc:HGNC:4379]	1.65807	2.27695e-06		ENSMUSG00000034781	Gna11	guanine nucleotide binding protein, alpha 11 [Source:MGI Symbol;Acc:MGI:95766]	0.87354	0.0638537	0.854532	0.0146057	1.01588	0.823463
ENSG00000182718	ANXA2	annexin A2 [Source:HGNC Symbol;Acc:HGNC:537]	1.65774	0.00111797		ENSMUSG00000032231	Anxa2	annexin A2 [Source:MGI Symbol;Acc:MGI:88246]	2.60279	1.91024e-09	1.18412	0.0126987	1.30496	3.35815e-08
ENSG00000145780	FEM1C	fem-1 homolog c (C. elegans) [Source:HGNC Symbol;Acc:HGNC:16933]	1.65749	0.000372972		ENSMUSG00000033319	Fem1c	fem-1 homolog c (C.elegans) [Source:MGI Symbol;Acc:MGI:2444737]	2.06149	2.85965e-13	1.15464	0.0209288	1.16291	0.0141028
ENSG00000146278	PNRC1	proline-rich nuclear receptor coactivator 1 [Source:HGNC Symbol;Acc:HGNC:17278]	1.65723	0.000232477		ENSMUSG00000040128	Pnrc1	proline-rich nuclear receptor coactivator 1 [Source:MGI Symbol;Acc:MGI:1917838]	3.10629	2.80507e-45	4.47753	5.54907e-91	1.82786	3.19317e-23
ENSG00000114126	TFDP2	transcription factor Dp-2 (E2F dimerization partner 2) [Source:HGNC Symbol;Acc:HGNC:11751]	1.65644	0.000923669		ENSMUSG00000032411	Tfdp2	transcription factor Dp 2 [Source:MGI Symbol;Acc:MGI:107167]	1.54523	0.000195861	1.11982	0.11496	1.44222	6.9108e-09
ENSG00000171877	FRMD5	FERM domain containing 5 [Source:HGNC Symbol;Acc:HGNC:28214]	1.65598	1.6823e-07		ENSMUSG00000027238	Frmd5	FERM domain containing 5 [Source:MGI Symbol;Acc:MGI:2442557]	1.00813	0.962229	1.11204	0.182372	0.953654	0.604604
ENSG00000147162	OGT	O-linked N-acetylglucosamine (GlcNAc) transferase [Source:HGNC Symbol;Acc:HGNC:8127]	1.65489	0.000826212		ENSMUSG00000034160	Ogt	O-linked N-acetylglucosamine (GlcNAc) transferase (UDP-N-acetylglucosamine:polypeptide-N-acetylglucosaminyl transferase) [Source:MGI Symbol;Acc:MGI:1339639]	1.00056	0.96763	1.07498	0.206507	1.12192	0.0204983
ENSG00000170832	USP32	ubiquitin specific peptidase 32 [Source:HGNC Symbol;Acc:HGNC:19143]	1.65474	3.98624e-09		ENSMUSG00000000804	Usp32	ubiquitin specific peptidase 32 [Source:MGI Symbol;Acc:MGI:2144475]	1.0515	0.695014	1.14441	0.027985	1.22117	6.75135e-05
ENSG00000196872	KIAA1211L	KIAA1211-like [Source:HGNC Symbol;Acc:HGNC:33454]	1.65398	0.0550332		ENSMUSG00000026090	2010300C02Rik	RIKEN cDNA 2010300C02 gene [Source:MGI Symbol;Acc:MGI:1919347]	0.879159	0.299843	1.00269	0.993698	1.21163	0.236963
ENSG00000151729	SLC25A4	solute carrier family 25 (mitochondrial carrier; adenine nucleotide translocator), member 4 [Source:HGNC Symbol;Acc:HGNC:10990]	1.65396	5.10481e-10		ENSMUSG00000031633	Slc25a4	solute carrier family 25 (mitochondrial carrier, adenine nucleotide translocator), member 4 [Source:MGI Symbol;Acc:MGI:1353495]	1.02848	0.820875	1.0184	0.805445	1.11103	0.0161649
ENSG00000125249	RAP2A	RAP2A, member of RAS oncogene family [Source:HGNC Symbol;Acc:HGNC:9861]	1.65393	1.28149e-12		ENSMUSG00000051615	Rap2a	RAS related protein 2a [Source:MGI Symbol;Acc:MGI:97855]	1.45913	1.17053e-09	1.55579	3.30083e-10	1.75731	3.85918e-20
ENSG00000164105	SAP30	Sin3A-associated protein, 30kDa [Source:HGNC Symbol;Acc:HGNC:10532]	1.65369	4.64769e-09		ENSMUSG00000031609	Sap30	sin3 associated polypeptide [Source:MGI Symbol;Acc:MGI:1929129]	10.5874	1.58561e-66	2.25986	8.86877e-27	1.66288	6.72831e-06
ENSG00000144747	TMF1	TATA element modulatory factor 1 [Source:HGNC Symbol;Acc:HGNC:11870]	1.65345	0.000110077		ENSMUSG00000030059	Tmf1	TATA element modulatory factor 1 [Source:MGI Symbol;Acc:MGI:2684999]	0.892618	0.254894	1.0647	0.360417	1.17187	0.0146425
ENSG00000106299	WASL	Wiskott-Aldrich syndrome-like [Source:HGNC Symbol;Acc:HGNC:12735]	1.65268	1.61385e-07		ENSMUSG00000029684	Wasl	Wiskott-Aldrich syndrome-like (human) [Source:MGI Symbol;Acc:MGI:1920428]	1.85046	2.94245e-16	1.5714	6.53963e-14	1.3389	1.80032e-08
ENSG00000119318	RAD23B	RAD23 homolog B, nucleotide excision repair protein [Source:HGNC Symbol;Acc:HGNC:9813]	1.65247	1.41406e-09		ENSMUSG00000028426	Rad23b	RAD23b homolog (S. cerevisiae) [Source:MGI Symbol;Acc:MGI:105128]	1.30758	6.16057e-08	1.27958	1.6779e-06	1.23376	1.15815e-06
ENSG00000138757	G3BP2	GTPase activating protein (SH3 domain) binding protein 2 [Source:HGNC Symbol;Acc:HGNC:30291]	1.65146	1.3432e-07		ENSMUSG00000029405	G3bp2	GTPase activating protein (SH3 domain) binding protein 2 [Source:MGI Symbol;Acc:MGI:2442040]	1.00356	0.977062	0.83753	0.000683968	0.970523	0.633983
ENSG00000090060	PAPOLA	poly(A) polymerase alpha [Source:HGNC Symbol;Acc:HGNC:14981]	1.65143	7.77733e-12		ENSMUSG00000021111	Papola	poly (A) polymerase alpha [Source:MGI Symbol;Acc:MGI:109301]	1.82213	1.89478e-14	1.84767	5.42008e-28	1.62341	1.04807e-23
ENSG00000140600	SH3GL3	SH3-domain GRB2-like 3 [Source:HGNC Symbol;Acc:HGNC:10832]	1.65133	1.25374e-09		ENSMUSG00000030638	Sh3gl3	SH3-domain GRB2-like 3 [Source:MGI Symbol;Acc:MGI:700011]	0.997979	0.960414	1.16988	0.0290436	1.15881	0.0603575
ENSG00000169972	PUSL1	pseudouridylate synthase-like 1 [Source:HGNC Symbol;Acc:HGNC:26914]	1.65096	3.03564e-06		ENSMUSG00000051557	Pusl1	pseudouridylate synthase-like 1 [Source:MGI Symbol;Acc:MGI:3047787]	0.884464	0.31938	0.894033	0.274786	1.21838	0.0436075
ENSG00000102218	RP2	retinitis pigmentosa 2 (X-linked recessive) [Source:HGNC Symbol;Acc:HGNC:10274]	1.65064	1.17605e-06		ENSMUSG00000060090	Rp2h	retinitis pigmentosa 2 homolog (human) [Source:MGI Symbol;Acc:MGI:1277953]	1.34706	0.00021199	1.07961	0.414705	1.28065	0.00404327
ENSG00000123975	CKS2	CDC28 protein kinase regulatory subunit 2 [Source:HGNC Symbol;Acc:HGNC:2000]	1.64998	5.61304e-05		ENSMUSG00000062248	Cks2	CDC28 protein kinase regulatory subunit 2 [Source:MGI Symbol;Acc:MGI:1913447]	2.02367	0.000383544	1.33696	0.00369909	1.38262	0.0261232
ENSG00000113615	SEC24A	SEC24 family member A [Source:HGNC Symbol;Acc:HGNC:10703]	1.64909	2.10583e-05		ENSMUSG00000036391	Sec24a	Sec24 related gene family, member A (S. cerevisiae) [Source:MGI Symbol;Acc:MGI:1924621]	0.918726	0.550923	0.948681	0.623018	1.32467	1.77726e-06
ENSG00000107295	SH3GL2	SH3-domain GRB2-like 2 [Source:HGNC Symbol;Acc:HGNC:10831]	1.64904	1.46863e-12		ENSMUSG00000028488	Sh3gl2	SH3-domain GRB2-like 2 [Source:MGI Symbol;Acc:MGI:700009]	0.954826	0.632605	1.02566	0.852107	1.10878	0.0926514
ENSG00000143507	DUSP10	dual specificity phosphatase 10 [Source:HGNC Symbol;Acc:HGNC:3065]	1.64861	0.0017575		ENSMUSG00000039384	Dusp10	dual specificity phosphatase 10 [Source:MGI Symbol;Acc:MGI:1927070]	3.71433	4.90691e-19	3.68644	1.48423e-36	3.85193	1.89748e-47
ENSG00000134318	ROCK2	Rho-associated, coiled-coil containing protein kinase 2 [Source:HGNC Symbol;Acc:HGNC:10252]	1.64843	1.6935e-11		ENSMUSG00000020580	Rock2	Rho-associated coiled-coil containing protein kinase 2 [Source:MGI Symbol;Acc:MGI:107926]	2.08742	5.07042e-12	2.41292	4.09797e-57	2.02032	2.83505e-54
ENSG00000123983	ACSL3	acyl-CoA synthetase long-chain family member 3 [Source:HGNC Symbol;Acc:HGNC:3570]	1.64726	4.08751e-09		ENSMUSG00000032883	Acsl3	acyl-CoA synthetase long-chain family member 3 [Source:MGI Symbol;Acc:MGI:1921455]	1.09889	0.307832	1.22817	0.00040336	1.7425	2.08609e-29
ENSG00000170037	CNTROB	centrobin, centrosomal BRCA2 interacting protein [Source:HGNC Symbol;Acc:HGNC:29616]	1.64715	8.6302e-09		ENSMUSG00000032782	Cntrob	centrobin, centrosomal BRCA2 interacting protein [Source:MGI Symbol;Acc:MGI:2443290]	0.863475	0.124194	0.62964	5.72734e-12	0.494107	2.33892e-16
ENSG00000160214	RRP1	ribosomal RNA processing 1 [Source:HGNC Symbol;Acc:HGNC:18785]	1.64711	4.835e-06		ENSMUSG00000061032	Rrp1	ribosomal RNA processing 1 homolog (S. cerevisiae) [Source:MGI Symbol;Acc:MGI:1203500]	1.77835	2.35673e-15	1.6522	1.39551e-26	1.71554	2.39695e-20
ENSG00000115520	COQ10B	coenzyme Q10B [Source:HGNC Symbol;Acc:HGNC:25819]	1.6471	9.19152e-07		ENSMUSG00000025981	Coq10b	coenzyme Q10 homolog B (S. cerevisiae) [Source:MGI Symbol;Acc:MGI:1915126]	4.99008	6.14702e-102	4.27076	4.45497e-77	3.65018	2.48993e-72
ENSG00000071564	TCF3	transcription factor 3 [Source:HGNC Symbol;Acc:HGNC:11633]	1.64702	3.16915e-07		ENSMUSG00000020167	Tcf3	transcription factor 3 [Source:MGI Symbol;Acc:MGI:98510]	0.96511	0.692541	0.982478	0.870562	1.1781	0.0024478
ENSG00000074590	NUAK1	NUAK family, SNF1-like kinase, 1 [Source:HGNC Symbol;Acc:HGNC:14311]	1.64675	1.94641e-07		ENSMUSG00000020032	Nuak1	NUAK family, SNF1-like kinase, 1 [Source:MGI Symbol;Acc:MGI:1925226]	1.11155	0.51513	0.762981	1.77182e-06	1.51068	8.82567e-16
ENSG00000170425	ADORA2B	adenosine A2b receptor [Source:HGNC Symbol;Acc:HGNC:264]	1.64671	0.00894633		ENSMUSG00000018500	Adora2b	adenosine A2b receptor [Source:MGI Symbol;Acc:MGI:99403]	0.393471	0.00773725	0.888961	0.642267	1.0779	0.841592
ENSG00000162885	B3GALNT2	beta-1,3-N-acetylgalactosaminyltransferase 2 [Source:HGNC Symbol;Acc:HGNC:28596]	1.64618	0.000840431		ENSMUSG00000039242	B3galnt2	UDP-GalNAc:betaGlcNAc beta 1,3-galactosaminyltransferase, polypeptide 2 [Source:MGI Symbol;Acc:MGI:2145517]	1.24989	0.019122	1.314	0.000223152	1.44384	4.53446e-08
ENSG00000163812	ZDHHC3	zinc finger, DHHC-type containing 3 [Source:HGNC Symbol;Acc:HGNC:18470]	1.64593	1.35052e-12		ENSMUSG00000025786	Zdhhc3	zinc finger, DHHC domain containing 3 [Source:MGI Symbol;Acc:MGI:1926134]	0.878269	0.136241	0.949592	0.552224	0.999952	0.997566
ENSG00000090520	DNAJB11	DnaJ (Hsp40) homolog, subfamily B, member 11 [Source:HGNC Symbol;Acc:HGNC:14889]	1.64569	2.02298e-11		ENSMUSG00000004460	Dnajb11	DnaJ (Hsp40) homolog, subfamily B, member 11 [Source:MGI Symbol;Acc:MGI:1915088]	1.022	0.921539	0.936889	0.417733	1.01202	0.8826
ENSG00000126767	ELK1	ELK1, member of ETS oncogene family [Source:HGNC Symbol;Acc:HGNC:3321]	1.64524	1.71845e-05		ENSMUSG00000009406	Elk1	ELK1, member of ETS oncogene family [Source:MGI Symbol;Acc:MGI:101833]	0.823915	0.0304608	0.670816	1.36749e-10	1.1685	0.0301211
ENSG00000155961	RAB39B	RAB39B, member RAS oncogene family [Source:HGNC Symbol;Acc:HGNC:16499]	1.64433	0.00013062		ENSMUSG00000031202	Rab39b	RAB39B, member RAS oncogene family [Source:MGI Symbol;Acc:MGI:1915040]	1.13348	0.282711	1.71251	5.19375e-12	1.19381	0.0297664
ENSG00000100345	MYH9	myosin, heavy chain 9, non-muscle [Source:HGNC Symbol;Acc:HGNC:7579]	1.64417	2.29841e-05		ENSMUSG00000022443	Myh9	myosin, heavy polypeptide 9, non-muscle [Source:MGI Symbol;Acc:MGI:107717]	2.18609	1.34837e-12	1.11996	0.0993199	1.47898	6.15263e-14
ENSG00000213160	KLHL23	kelch-like family member 23 [Source:HGNC Symbol;Acc:HGNC:27506]	1.64382	2.24464e-10		ENSMUSG00000042155	Klhl23	kelch-like 23 [Source:MGI Symbol;Acc:MGI:2683536]	1.03028	0.893773	0.971736	0.736848	0.851024	0.000566931
ENSG00000120686	UFM1	ubiquitin-fold modifier 1 [Source:HGNC Symbol;Acc:HGNC:20597]	1.64372	1.03895e-07		ENSMUSG00000027746	Ufm1	ubiquitin-fold modifier 1 [Source:MGI Symbol;Acc:MGI:1915140]	0.85242	0.0744437	0.780602	4.4505e-05	1.01607	0.835652
ENSG00000103365	GGA2	golgi-associated, gamma adaptin ear containing, ARF binding protein 2 [Source:HGNC Symbol;Acc:HGNC:16064]	1.64247	1.50161e-05		ENSMUSG00000030872	Gga2	golgi associated, gamma adaptin ear containing, ARF binding protein 2 [Source:MGI Symbol;Acc:MGI:1921355]	0.942235	0.749635	1.00793	0.922755	1.61038	9.99186e-25
ENSG00000163545	NUAK2	NUAK family, SNF1-like kinase, 2 [Source:HGNC Symbol;Acc:HGNC:29558]	1.64226	2.03191e-06		ENSMUSG00000009772	Nuak2	NUAK family, SNF1-like kinase, 2 [Source:MGI Symbol;Acc:MGI:1921387]	1.41597	0.0223634	1.05583	0.740068	1.10486	0.36956
ENSG00000052126	PLEKHA5	pleckstrin homology domain containing, family A member 5 [Source:HGNC Symbol;Acc:HGNC:30036]	1.64224	2.62046e-12		ENSMUSG00000030231	Plekha5	pleckstrin homology domain containing, family A member 5 [Source:MGI Symbol;Acc:MGI:1923802]	1.3019	0.00020615	1.37993	7.53414e-09	1.34676	2.50241e-06
ENSG00000163171	CDC42EP3	CDC42 effector protein (Rho GTPase binding) 3 [Source:HGNC Symbol;Acc:HGNC:16943]	1.64168	2.97083e-05		ENSMUSG00000036533	Cdc42ep3	CDC42 effector protein (Rho GTPase binding) 3 [Source:MGI Symbol;Acc:MGI:2384718]	0.991283	0.998459	0.731069	2.58457e-05	1.08468	0.44003
ENSG00000131773	KHDRBS3	KH domain containing, RNA binding, signal transduction associated 3 [Source:HGNC Symbol;Acc:HGNC:18117]	1.64144	2.30196e-09		ENSMUSG00000022332	Khdrbs3	KH domain containing, RNA binding, signal transduction associated 3 [Source:MGI Symbol;Acc:MGI:1313312]	1.2225	0.00251493	1.08763	0.154231	1.09789	0.176914
ENSG00000167491	GATAD2A	GATA zinc finger domain containing 2A [Source:HGNC Symbol;Acc:HGNC:29989]	1.6412	2.03095e-10		ENSMUSG00000036180	Gatad2a	GATA zinc finger domain containing 2A [Source:MGI Symbol;Acc:MGI:2384585]	1.01601	0.958051	0.915683	0.211407	1.26136	5.47694e-05
ENSG00000103264	FBXO31	F-box protein 31 [Source:HGNC Symbol;Acc:HGNC:16510]	1.64117	4.85606e-05		ENSMUSG00000052934	Fbxo31	F-box protein 31 [Source:MGI Symbol;Acc:MGI:1354708]	0.689034	5.07674e-06	0.589598	4.41505e-22	0.724314	2.5963e-08
ENSG00000143162	CREG1	cellular repressor of E1A-stimulated genes 1 [Source:HGNC Symbol;Acc:HGNC:2351]	1.6411	4.85571e-09		ENSMUSG00000040713	Creg1	cellular repressor of E1A-stimulated genes 1 [Source:MGI Symbol;Acc:MGI:1344382]	1.36148	0.00126109	1.61083	2.73242e-10	1.59344	1.28701e-13
ENSG00000123268	ATF1	activating transcription factor 1 [Source:HGNC Symbol;Acc:HGNC:783]	1.64097	6.98019e-06		ENSMUSG00000023027	Atf1	activating transcription factor 1 [Source:MGI Symbol;Acc:MGI:1298366]	0.97009	0.849509	1.15032	0.276613	1.20264	0.0164012
ENSG00000089486	CDIP1	cell death-inducing p53 target 1 [Source:HGNC Symbol;Acc:HGNC:13234]	1.64025	8.47843e-07		ENSMUSG00000004071	Cdip1	cell death inducing Trp53 target 1 [Source:MGI Symbol;Acc:MGI:1913876]	1.27755	0.00296919	1.48498	1.87101e-14	1.6645	7.78153e-26
ENSG00000166813	KIF7	kinesin family member 7 [Source:HGNC Symbol;Acc:HGNC:30497]	1.64022	5.09662e-08		ENSMUSG00000050382	Kif7	kinesin family member 7 [Source:MGI Symbol;Acc:MGI:1098239]	1.27708	0.232022	0.967759	0.866244	1.06849	0.621356
ENSG00000144847	IGSF11	immunoglobulin superfamily, member 11 [Source:HGNC Symbol;Acc:HGNC:16669]	1.63967	4.07336e-09		ENSMUSG00000022790	Igsf11	immunoglobulin superfamily, member 11 [Source:MGI Symbol;Acc:MGI:2388477]	0.905123	0.397748	0.850563	0.0299458	1.12377	0.0882357
ENSG00000143793	C1orf35	chromosome 1 open reading frame 35 [Source:HGNC Symbol;Acc:HGNC:19032]	1.63945	0.00309704		ENSMUSG00000020441	2310033P09Rik	RIKEN cDNA 2310033P09 gene [Source:MGI Symbol;Acc:MGI:1915112]	2.10331	1.48887e-05	1.34125	0.00823829	1.38977	0.0058406
ENSG00000171368	TPPP	tubulin polymerization promoting protein [Source:HGNC Symbol;Acc:HGNC:24164]	1.63913	2.69173e-05		ENSMUSG00000021573	Tppp	tubulin polymerization promoting protein [Source:MGI Symbol;Acc:MGI:1920198]	0.616511	3.63464e-08	0.496494	2.96543e-29	0.689627	3.03123e-09
ENSG00000101557	USP14	ubiquitin specific peptidase 14 (tRNA-guanine transglycosylase) [Source:HGNC Symbol;Acc:HGNC:12612]	1.63909	1.17812e-06		ENSMUSG00000047879	Usp14	ubiquitin specific peptidase 14 [Source:MGI Symbol;Acc:MGI:1928898]	1.31831	8.33824e-06	1.27454	4.23402e-06	1.09443	0.0688855
ENSG00000081913	PHLPP1	PH domain and leucine rich repeat protein phosphatase 1 [Source:HGNC Symbol;Acc:HGNC:20610]	1.63906	2.82302e-06		ENSMUSG00000044340	Phlpp1	PH domain and leucine rich repeat protein phosphatase 1 [Source:MGI Symbol;Acc:MGI:2138327]	1.71712	3.59473e-06	1.87562	5.50171e-34	1.41128	1.4327e-09
ENSG00000105784	RUNDC3B	RUN domain containing 3B [Source:HGNC Symbol;Acc:HGNC:30286]	1.63892	6.53573e-07		ENSMUSG00000040570	Rundc3b	RUN domain containing 3B [Source:MGI Symbol;Acc:MGI:2685286]	1.10822	0.354836	0.957248	0.616676	0.88105	0.0410833
ENSG00000182606	TRAK1	trafficking protein, kinesin binding 1 [Source:HGNC Symbol;Acc:HGNC:29947]	1.63874	3.72007e-09		ENSMUSG00000032536	Trak1	trafficking protein, kinesin binding 1 [Source:MGI Symbol;Acc:MGI:1914345]	1.53379	3.17293e-15	1.17263	0.00256817	1.3062	4.90377e-08
ENSG00000108819	PPP1R9B	protein phosphatase 1, regulatory subunit 9B [Source:HGNC Symbol;Acc:HGNC:9298]	1.63819	3.82784e-07		ENSMUSG00000038976	Ppp1r9b	protein phosphatase 1, regulatory subunit 9B [Source:MGI Symbol;Acc:MGI:2387581]	0.952711	0.714833	0.977768	0.757617	0.994093	0.932883
ENSG00000105642	KCNN1	potassium channel, calcium activated intermediate/small conductance subfamily N alpha, member 1 [Source:HGNC Symbol;Acc:HGNC:6290]	1.63812	1.49323e-05		ENSMUSG00000002908	Kcnn1	potassium intermediate/small conductance calcium-activated channel, subfamily N, member 1 [Source:MGI Symbol;Acc:MGI:1933993]	1.0682	0.801651	0.739197	0.00167689	1.05099	0.510693
ENSG00000206560	ANKRD28	ankyrin repeat domain 28 [Source:HGNC Symbol;Acc:HGNC:29024]	1.63803	5.37014e-09		ENSMUSG00000014496	Ankrd28	ankyrin repeat domain 28 [Source:MGI Symbol;Acc:MGI:2145661]	2.22556	3.59985e-08	2.5754	6.02295e-54	1.63499	3.18064e-17
ENSG00000175832	ETV4	ets variant 4 [Source:HGNC Symbol;Acc:HGNC:3493]	1.63637	0.21209		ENSMUSG00000017724	Etv4	ets variant 4 [Source:MGI Symbol;Acc:MGI:99423]	0.744152	0.117874	1.02954	0.806991	1.24278	0.0278018
ENSG00000163156	SCNM1	sodium channel modifier 1 [Source:HGNC Symbol;Acc:HGNC:23136]	1.63612	1.01433e-06		ENSMUSG00000092607	Scnm1	sodium channel modifier 1 [Source:MGI Symbol;Acc:MGI:1341284]	0.753859	0.0168444	0.622915	6.87656e-07	0.853752	0.132915
ENSG00000086712	TXLNG	taxilin gamma [Source:HGNC Symbol;Acc:HGNC:18578]	1.63605	3.01498e-05		ENSMUSG00000038344	Txlng	taxilin gamma [Source:MGI Symbol;Acc:MGI:3590652]	1.30292	0.000824552	1.17692	0.0490081	1.21322	0.039678
ENSG00000196361	ELAVL3	ELAV like neuron-specific RNA binding protein 3 [Source:HGNC Symbol;Acc:HGNC:3314]	1.63592	4.55748e-05		ENSMUSG00000003410	Elavl3	ELAV (embryonic lethal, abnormal vision, Drosophila)-like 3 (Hu antigen C) [Source:MGI Symbol;Acc:MGI:109157]	1.27916	0.0200076	1.19498	0.000294055	1.35332	1.40512e-10
ENSG00000158445	KCNB1	potassium channel, voltage gated Shab related subfamily B, member 1 [Source:HGNC Symbol;Acc:HGNC:6231]	1.63558	1.23327e-05		ENSMUSG00000050556	Kcnb1	potassium voltage gated channel, Shab-related subfamily, member 1 [Source:MGI Symbol;Acc:MGI:96666]	0.724768	0.00435903	0.834212	0.0222833	0.816692	0.0350949
ENSG00000019102	VSIG2	V-set and immunoglobulin domain containing 2 [Source:HGNC Symbol;Acc:HGNC:17149]	1.63528	0.00817869		ENSMUSG00000001943	Vsig2	V-set and immunoglobulin domain containing 2 [Source:MGI Symbol;Acc:MGI:1928009]	1.35701	0.0584264	3.73738	0.000340594	1.54826	0.179867
ENSG00000172733	PURG	purine-rich element binding protein G [Source:HGNC Symbol;Acc:HGNC:17930]	1.63521	0.000799543		ENSMUSG00000049184	Purg	purine-rich element binding protein G [Source:MGI Symbol;Acc:MGI:1922279]	1.67257	1.65417e-06	1.35478	5.2632e-07	1.57727	2.2584e-11
ENSG00000137876	RSL24D1	ribosomal L24 domain containing 1 [Source:HGNC Symbol;Acc:HGNC:18479]	1.63451	1.80184e-07		ENSMUSG00000032215	Rsl24d1	ribosomal L24 domain containing 1 [Source:MGI Symbol;Acc:MGI:2681840]	0.746579	0.000414469	0.743826	2.7193e-05	0.966155	0.734983
ENSG00000125505	MBOAT7	membrane bound O-acyltransferase domain containing 7 [Source:HGNC Symbol;Acc:HGNC:15505]	1.63439	1.74596e-09		ENSMUSG00000035596	Mboat7	membrane bound O-acyltransferase domain containing 7 [Source:MGI Symbol;Acc:MGI:1924832]	1.0847	0.463216	1.22928	0.000735172	1.35704	1.55413e-11
ENSG00000116871	MAP7D1	MAP7 domain containing 1 [Source:HGNC Symbol;Acc:HGNC:25514]	1.63384	4.09835e-07		ENSMUSG00000028849	Map7d1	MAP7 domain containing 1 [Source:MGI Symbol;Acc:MGI:2384297]	1.2714	0.0184525	1.3262	7.02763e-08	1.72176	5.00421e-35
ENSG00000140280	LYSMD2	LysM, putative peptidoglycan-binding, domain containing 2 [Source:HGNC Symbol;Acc:HGNC:28571]	1.63362	1.76328e-05		ENSMUSG00000032184	Lysmd2	LysM, putative peptidoglycan-binding, domain containing 2 [Source:MGI Symbol;Acc:MGI:1917332]	0.729389	0.00196122	0.602609	5.05679e-07	1.06607	0.526227
ENSG00000132507	EIF5A	eukaryotic translation initiation factor 5A [Source:HGNC Symbol;Acc:HGNC:3300]	1.63345	3.95598e-08		ENSMUSG00000078812	Eif5a	eukaryotic translation initiation factor 5A [Source:MGI Symbol;Acc:MGI:106248]	1.78377	1.55973e-08	1.86096	9.96878e-30	1.53278	6.9888e-21
ENSG00000143320	CRABP2	cellular retinoic acid binding protein 2 [Source:HGNC Symbol;Acc:HGNC:2339]	1.63177	5.83737e-06		ENSMUSG00000004885	Crabp2	cellular retinoic acid binding protein II [Source:MGI Symbol;Acc:MGI:88491]	4.40883	6.51895e-11	2.91372	4.85704e-06	1.10942	0.123865
ENSG00000178307	TMEM11	transmembrane protein 11 [Source:HGNC Symbol;Acc:HGNC:16823]	1.63144	8.03342e-08		ENSMUSG00000043284	Tmem11	transmembrane protein 11 [Source:MGI Symbol;Acc:MGI:2144726]	2.05554	5.48568e-14	1.57099	8.99032e-11	1.35544	7.02932e-05
ENSG00000110906	KCTD10	potassium channel tetramerization domain containing 10 [Source:HGNC Symbol;Acc:HGNC:23236]	1.63143	9.16263e-11		ENSMUSG00000001098	Kctd10	potassium channel tetramerisation domain containing 10 [Source:MGI Symbol;Acc:MGI:2141207]	1.1327	0.429034	0.935843	0.414529	1.65453	2.31677e-19
ENSG00000168005	C11orf84	chromosome 11 open reading frame 84 [Source:HGNC Symbol;Acc:HGNC:25115]	1.63136	8.91453e-10		ENSMUSG00000024970	AI846148	expressed sequence AI846148 [Source:MGI Symbol;Acc:MGI:2147611]	0.738759	0.00863276	0.851645	0.0442745	1.1576	0.0446365
ENSG00000119280	C1orf198	chromosome 1 open reading frame 198 [Source:HGNC Symbol;Acc:HGNC:25900]	1.63075	3.93485e-07		ENSMUSG00000031983	2310022B05Rik	RIKEN cDNA 2310022B05 gene [Source:MGI Symbol;Acc:MGI:1916801]	1.07688	0.546709	0.796901	0.000560076	1.09322	0.15508
ENSG00000110851	PRDM4	PR domain containing 4 [Source:HGNC Symbol;Acc:HGNC:9348]	1.63075	2.92756e-08		ENSMUSG00000035529	Prdm4	PR domain containing 4 [Source:MGI Symbol;Acc:MGI:1920093]	1.03036	0.901992	0.833997	0.00429474	1.07316	0.298549
ENSG00000180616	SSTR2	somatostatin receptor 2 [Source:HGNC Symbol;Acc:HGNC:11331]	1.63041	0.00481738		ENSMUSG00000047904	Sstr2	somatostatin receptor 2 [Source:MGI Symbol;Acc:MGI:98328]	5.14518	1.66504e-22	6.67576	7.61978e-159	3.77461	1.96581e-59
ENSG00000099624	ATP5D	ATP synthase, H+ transporting, mitochondrial F1 complex, delta subunit [Source:HGNC Symbol;Acc:HGNC:837]	1.63032	3.21255e-08		ENSMUSG00000003072	Atp5d	ATP synthase, H+ transporting, mitochondrial F1 complex, delta subunit [Source:MGI Symbol;Acc:MGI:1913293]	1.77191	2.99175e-08	2.04638	1.34273e-42	1.77597	1.29465e-30
ENSG00000123575	FAM199X	family with sequence similarity 199, X-linked [Source:HGNC Symbol;Acc:HGNC:25195]	1.62989	1.45708e-06		ENSMUSG00000042595	Fam199x	family with sequence similarity 199, X-linked [Source:MGI Symbol;Acc:MGI:2384304]	1.00707	0.977456	0.837009	0.0072331	1.11506	0.19181
ENSG00000113448	PDE4D	phosphodiesterase 4D, cAMP-specific [Source:HGNC Symbol;Acc:HGNC:8783]	1.62985	1.90381e-07		ENSMUSG00000021699	Pde4d	phosphodiesterase 4D, cAMP specific [Source:MGI Symbol;Acc:MGI:99555]	1.99393	1.88178e-34	3.0745	1.35372e-108	1.83088	7.70883e-19
ENSG00000166173	LARP6	La ribonucleoprotein domain family, member 6 [Source:HGNC Symbol;Acc:HGNC:24012]	1.62949	1.76827e-07		ENSMUSG00000034839	Larp6	La ribonucleoprotein domain family, member 6 [Source:MGI Symbol;Acc:MGI:1914807]	0.477032	6.07377e-14	0.468754	1.37299e-12	0.52509	8.35771e-13
ENSG00000114315	HES1	hes family bHLH transcription factor 1 [Source:HGNC Symbol;Acc:HGNC:5192]	1.62894	1.42773e-07		ENSMUSG00000022528	Hes1	hairy and enhancer of split 1 (Drosophila) [Source:MGI Symbol;Acc:MGI:104853]	1.15054	0.556699	1.39005	0.00867766	1.29824	0.00379607
ENSG00000105063	PPP6R1	protein phosphatase 6, regulatory subunit 1 [Source:HGNC Symbol;Acc:HGNC:29195]	1.62825	1.65678e-09		ENSMUSG00000052296	Ppp6r1	protein phosphatase 6, regulatory subunit 1 [Source:MGI Symbol;Acc:MGI:2442163]	1.00682	0.971818	1.00775	0.935064	1.17414	0.00051499
ENSG00000116161	CACYBP	calcyclin binding protein [Source:HGNC Symbol;Acc:HGNC:30423]	1.62764	3.96889e-09		ENSMUSG00000014226	Cacybp	calcyclin binding protein [Source:MGI Symbol;Acc:MGI:1270839]	1.06964	0.529639	1.03538	0.64091	1.08122	0.154267
ENSG00000005893	LAMP2	lysosomal-associated membrane protein 2 [Source:HGNC Symbol;Acc:HGNC:6501]	1.62749	3.08169e-10		ENSMUSG00000016534	Lamp2	lysosomal-associated membrane protein 2 [Source:MGI Symbol;Acc:MGI:96748]	1.90594	8.33952e-10	1.48587	5.04715e-13	1.39116	3.70393e-14
ENSG00000065613	SLK	STE20-like kinase [Source:HGNC Symbol;Acc:HGNC:11088]	1.62744	4.40835e-07		ENSMUSG00000025060	Slk	STE20-like kinase [Source:MGI Symbol;Acc:MGI:103241]	2.1455	1.70301e-28	1.29386	0.000124351	1.50185	2.66003e-12
ENSG00000136240	KDELR2	KDEL (Lys-Asp-Glu-Leu) endoplasmic reticulum protein retention receptor 2 [Source:HGNC Symbol;Acc:HGNC:6305]	1.62704	3.71432e-07		ENSMUSG00000079111	Kdelr2	KDEL (Lys-Asp-Glu-Leu) endoplasmic reticulum protein retention receptor 2 [Source:MGI Symbol;Acc:MGI:1914163]	0.745031	0.0123587	0.857704	0.0159966	1.21086	0.000186508
ENSG00000071859	FAM50A	family with sequence similarity 50, member A [Source:HGNC Symbol;Acc:HGNC:18786]	1.62656	0.000312342		ENSMUSG00000001962	Fam50a	family with sequence similarity 50, member A [Source:MGI Symbol;Acc:MGI:1351626]	1.30722	0.0146317	1.11097	0.22341	1.32176	9.75959e-06
ENSG00000166130	IKBIP	IKBKB interacting protein [Source:HGNC Symbol;Acc:HGNC:26430]	1.62616	6.37579e-06		ENSMUSG00000019975	Ikbip	IKBKB interacting protein [Source:MGI Symbol;Acc:MGI:1914704]	0.973423	0.886388	0.972539	0.809153	1.20884	0.00192812
ENSG00000065559	MAP2K4	mitogen-activated protein kinase kinase 4 [Source:HGNC Symbol;Acc:HGNC:6844]	1.62601	2.24547e-17		ENSMUSG00000033352	Map2k4	mitogen-activated protein kinase kinase 4 [Source:MGI Symbol;Acc:MGI:1346869]	0.859331	0.190764	0.968868	0.691552	1.03841	0.510323
ENSG00000182149	IST1	increased sodium tolerance 1 homolog (yeast) [Source:HGNC Symbol;Acc:HGNC:28977]	1.62515	5.39167e-06		ENSMUSG00000031729	Ist1	increased sodium tolerance 1 homolog (yeast) [Source:MGI Symbol;Acc:MGI:1919205]	1.63984	5.77228e-10	1.39185	4.53193e-09	1.52452	1.30711e-18
ENSG00000120948	TARDBP	TAR DNA binding protein [Source:HGNC Symbol;Acc:HGNC:11571]	1.62502	3.9553e-08		ENSMUSG00000041459	Tardbp	TAR DNA binding protein [Source:MGI Symbol;Acc:MGI:2387629]	1.10755	0.450049	1.27357	1.77416e-06	1.30882	6.43142e-10
ENSG00000115137	DNAJC27	DnaJ (Hsp40) homolog, subfamily C, member 27 [Source:HGNC Symbol;Acc:HGNC:30290]	1.6247	2.28857e-05		ENSMUSG00000020657	Dnajc27	DnaJ (Hsp40) homolog, subfamily C, member 27 [Source:MGI Symbol;Acc:MGI:2443036]	0.963657	0.715224	1.16562	0.0454312	1.0371	0.61522
ENSG00000179456	ZBTB18	zinc finger and BTB domain containing 18 [Source:HGNC Symbol;Acc:HGNC:13030]	1.62454	5.31326e-09		ENSMUSG00000063659	Zbtb18	zinc finger and BTB domain containing 18 [Source:MGI Symbol;Acc:MGI:1353609]	0.848513	0.094912	0.487044	2.49452e-51	1.25589	0.000107396
ENSG00000106546	AHR	aryl hydrocarbon receptor [Source:HGNC Symbol;Acc:HGNC:348]	1.62441	0.000156183		ENSMUSG00000019256	Ahr	aryl-hydrocarbon receptor [Source:MGI Symbol;Acc:MGI:105043]	0.92412	0.61483	0.799718	0.0699175	1.32046	3.05807e-05
ENSG00000170291	ELP5	elongator acetyltransferase complex subunit 5 [Source:HGNC Symbol;Acc:HGNC:30617]	1.62421	5.95771e-09		ENSMUSG00000018565	Elp5	elongator acetyltransferase complex subunit 5 [Source:MGI Symbol;Acc:MGI:1859017]	1.75964	1.88663e-11	1.33226	2.64574e-06	1.3845	1.90629e-09
ENSG00000180398	MCFD2	multiple coagulation factor deficiency 2 [Source:HGNC Symbol;Acc:HGNC:18451]	1.62397	1.30884e-20		ENSMUSG00000024150	Mcfd2	multiple coagulation factor deficiency 2 [Source:MGI Symbol;Acc:MGI:2183439]	1.11854	0.49634	1.02081	0.854527	1.35738	1.77791e-07
ENSG00000163162	RNF149	ring finger protein 149 [Source:HGNC Symbol;Acc:HGNC:23137]	1.62385	6.92696e-08		ENSMUSG00000048234	Rnf149	ring finger protein 149 [Source:MGI Symbol;Acc:MGI:2677438]	1.1051	0.601257	1.3222	0.000470475	1.21672	0.0142962
ENSG00000071127	WDR1	WD repeat domain 1 [Source:HGNC Symbol;Acc:HGNC:12754]	1.62356	2.09333e-09		ENSMUSG00000005103	Wdr1	WD repeat domain 1 [Source:MGI Symbol;Acc:MGI:1337100]	1.41929	2.14914e-05	1.12526	0.0310043	1.35264	6.03248e-13
ENSG00000068366	ACSL4	acyl-CoA synthetase long-chain family member 4 [Source:HGNC Symbol;Acc:HGNC:3571]	1.62332	2.47228e-07		ENSMUSG00000031278	Acsl4	acyl-CoA synthetase long-chain family member 4 [Source:MGI Symbol;Acc:MGI:1354713]	1.52384	2.445e-12	3.6829	4.07101e-115	2.33449	1.21544e-11
ENSG00000130024	PHF10	PHD finger protein 10 [Source:HGNC Symbol;Acc:HGNC:18250]	1.62315	3.02366e-07		ENSMUSG00000023883	Phf10	PHD finger protein 10 [Source:MGI Symbol;Acc:MGI:1919307]	1.75334	1.2841e-07	1.82508	7.45519e-26	1.68137	1.14354e-23
ENSG00000008283	CYB561	cytochrome b561 [Source:HGNC Symbol;Acc:HGNC:2571]	1.62314	3.9553e-08		ENSMUSG00000019590	Cyb561	cytochrome b-561 [Source:MGI Symbol;Acc:MGI:103253]	0.68077	0.00395117	0.407232	2.22482e-24	1.00484	0.958766
ENSG00000207864	MIR27B	microRNA 27b [Source:HGNC Symbol;Acc:HGNC:31614]	1.6231	0.546565		ENSMUSG00000065475	Mir27b	microRNA 27b [Source:MGI Symbol;Acc:MGI:2676903]	0.427238	0.208589	0.730192	0.633274	1.17086	0.870301
ENSG00000170027	YWHAG	tyrosine 3-monooxygenase/tryptophan 5-monooxygenase activation protein, gamma [Source:HGNC Symbol;Acc:HGNC:12852]	1.62265	9.16807e-07		ENSMUSG00000051391	Ywhag	tyrosine 3-monooxygenase/tryptophan 5-monooxygenase activation protein, gamma polypeptide [Source:MGI Symbol;Acc:MGI:108109]	0.987603	0.899819	1.03451	0.649365	1.21774	1.45601e-06
ENSG00000148411	NACC2	NACC family member 2, BEN and BTB (POZ) domain containing [Source:HGNC Symbol;Acc:HGNC:23846]	1.62227	3.28452e-05		ENSMUSG00000026932	Nacc2	nucleus accumbens associated 2, BEN and BTB (POZ) domain containing [Source:MGI Symbol;Acc:MGI:1915241]	1.16102	0.545698	1.33059	9.21164e-07	1.36332	1.13986e-10
ENSG00000185591	SP1	Sp1 transcription factor [Source:HGNC Symbol;Acc:HGNC:11205]	1.62047	0.000303458		ENSMUSG00000001280	Sp1	trans-acting transcription factor 1 [Source:MGI Symbol;Acc:MGI:98372]	1.72513	0.000258949	1.17481	0.0156871	1.21258	0.000165359
ENSG00000055070	SZRD1	SUZ RNA binding domain containing 1 [Source:HGNC Symbol;Acc:HGNC:30232]	1.62038	4.51445e-18		ENSMUSG00000040842	Szrd1	SUZ RNA binding domain containing 1 [Source:MGI Symbol;Acc:MGI:1098672]	1.5721	0.000805268	1.35735	6.04669e-08	1.55583	1.98564e-17
ENSG00000127124	HIVEP3	human immunodeficiency virus type I enhancer binding protein 3 [Source:HGNC Symbol;Acc:HGNC:13561]	1.61885	0.00486346		ENSMUSG00000028634	Hivep3	human immunodeficiency virus type I enhancer binding protein 3 [Source:MGI Symbol;Acc:MGI:106589]	0.954881	0.74164	0.697781	2.68024e-06	1.36928	5.70161e-05
ENSG00000129159	KCNC1	potassium channel, voltage gated Shaw related subfamily C, member 1 [Source:HGNC Symbol;Acc:HGNC:6233]	1.61867	0.00120922		ENSMUSG00000058975	Kcnc1	potassium voltage gated channel, Shaw-related subfamily, member 1 [Source:MGI Symbol;Acc:MGI:96667]	0.768001	0.000236653	1.03744	0.685828	1.35199	2.53265e-07
ENSG00000170385	SLC30A1	solute carrier family 30 (zinc transporter), member 1 [Source:HGNC Symbol;Acc:HGNC:11012]	1.61857	4.79268e-05		ENSMUSG00000037434	Slc30a1	solute carrier family 30 (zinc transporter), member 1 [Source:MGI Symbol;Acc:MGI:1345281]	0.788647	0.0213249	0.830055	0.0310492	0.934679	0.426171
ENSG00000068024	HDAC4	histone deacetylase 4 [Source:HGNC Symbol;Acc:HGNC:14063]	1.61832	2.31084e-08		ENSMUSG00000026313	Hdac4	histone deacetylase 4 [Source:MGI Symbol;Acc:MGI:3036234]	1.24471	0.0223388	1.46384	2.85861e-10	1.77771	9.80592e-27
ENSG00000133112	TPT1	tumor protein, translationally-controlled 1 [Source:HGNC Symbol;Acc:HGNC:12022]	1.61707	6.35293e-11		ENSMUSG00000060126	Tpt1	tumor protein, translationally-controlled 1 [Source:MGI Symbol;Acc:MGI:104890]	2.00907	8.79494e-27	1.63968	7.93492e-22	1.45422	1.66454e-19
ENSG00000171867	PRNP	prion protein [Source:HGNC Symbol;Acc:HGNC:9449]	1.61704	0.00315078		ENSMUSG00000079037	Prnp	prion protein [Source:MGI Symbol;Acc:MGI:97769]	1.4072	0.000448394	1.01349	0.926968	1.47939	1.78132e-18
ENSG00000213626	LBH	limb bud and heart development [Source:HGNC Symbol;Acc:HGNC:29532]	1.61672	1.13284e-12		ENSMUSG00000024063	Lbh	limb-bud and heart [Source:MGI Symbol;Acc:MGI:1925139]	1.42565	0.00286212	2.25776	4.41962e-42	2.5424	1.33219e-94
ENSG00000099942	CRKL	v-crk avian sarcoma virus CT10 oncogene homolog-like [Source:HGNC Symbol;Acc:HGNC:2363]	1.61532	1.31996e-06		ENSMUSG00000006134	Crkl	v-crk sarcoma virus CT10 oncogene homolog (avian)-like [Source:MGI Symbol;Acc:MGI:104686]	2.91874	3.15247e-26	1.90893	6.38411e-24	1.76684	2.86984e-26
ENSG00000137693	YAP1	Yes-associated protein 1 [Source:HGNC Symbol;Acc:HGNC:16262]	1.61434	3.68563e-05		ENSMUSG00000053110	Yap1	yes-associated protein 1 [Source:MGI Symbol;Acc:MGI:103262]	1.80146	1.3643e-14	1.60358	2.63235e-12	1.57076	3.43697e-21
ENSG00000114302	PRKAR2A	protein kinase, cAMP-dependent, regulatory, type II, alpha [Source:HGNC Symbol;Acc:HGNC:9391]	1.61402	8.45141e-19		ENSMUSG00000032601	Prkar2a	protein kinase, cAMP dependent regulatory, type II alpha [Source:MGI Symbol;Acc:MGI:108025]	1.5427	3.11812e-06	1.91977	3.82058e-31	1.08465	0.140337
ENSG00000198742	SMURF1	SMAD specific E3 ubiquitin protein ligase 1 [Source:HGNC Symbol;Acc:HGNC:16807]	1.61327	4.66901e-05		ENSMUSG00000038780	Smurf1	SMAD specific E3 ubiquitin protein ligase 1 [Source:MGI Symbol;Acc:MGI:1923038]	0.93173	0.532985	0.885122	0.0562758	1.25739	2.86142e-06
ENSG00000112511	PHF1	PHD finger protein 1 [Source:HGNC Symbol;Acc:HGNC:8919]	1.6131	6.60404e-10		ENSMUSG00000024193	Phf1	PHD finger protein 1 [Source:MGI Symbol;Acc:MGI:98647]	1.19143	0.150489	1.25275	0.00400938	1.27083	7.01303e-05
ENSG00000160785	SLC25A44	solute carrier family 25, member 44 [Source:HGNC Symbol;Acc:HGNC:29036]	1.61304	6.58106e-07		ENSMUSG00000050144	Slc25a44	solute carrier family 25, member 44 [Source:MGI Symbol;Acc:MGI:2444391]	0.882466	0.0508771	1.05612	0.493699	1.16585	0.00684054
ENSG00000196756	SNHG17	small nucleolar RNA host gene 17 [Source:HGNC Symbol;Acc:HGNC:48600]	1.61303	0.00165845		ENSMUSG00000085385	Snhg17	small nucleolar RNA host gene 17 [Source:MGI Symbol;Acc:MGI:1915358]	0.977045	0.92983	0.778244	0.00212606	1.02935	0.81333
ENSG00000173404	INSM1	insulinoma-associated 1 [Source:HGNC Symbol;Acc:HGNC:6090]	1.61279	2.91189e-05		ENSMUSG00000068154	Insm1	insulinoma-associated 1 [Source:MGI Symbol;Acc:MGI:1859980]	0.884127	0.716005	1.34646	3.18843e-06	1.34098	0.0856688
ENSG00000176171	BNIP3	BCL2/adenovirus E1B 19kDa interacting protein 3 [Source:HGNC Symbol;Acc:HGNC:1084]	1.61269	9.1231e-11		ENSMUSG00000078566	Bnip3	BCL2/adenovirus E1B interacting protein 3 [Source:MGI Symbol;Acc:MGI:109326]	0.997622	0.955203	0.989948	0.814871	1.15996	0.00134479
ENSG00000068323	TFE3	transcription factor binding to IGHM enhancer 3 [Source:HGNC Symbol;Acc:HGNC:11752]	1.61244	6.93111e-06		ENSMUSG00000000134	Tfe3	transcription factor E3 [Source:MGI Symbol;Acc:MGI:98511]	1.17334	0.0354671	1.16735	0.0429144	1.41047	2.80315e-10
ENSG00000108424	KPNB1	karyopherin (importin) beta 1 [Source:HGNC Symbol;Acc:HGNC:6400]	1.61224	3.04806e-08		ENSMUSG00000001440	Kpnb1	karyopherin (importin) beta 1 [Source:MGI Symbol;Acc:MGI:107532]	1.05722	0.564559	1.04434	0.51046	1.07499	0.119898
ENSG00000161654	LSM12	LSM12 homolog [Source:HGNC Symbol;Acc:HGNC:26407]	1.61192	4.03461e-06		ENSMUSG00000020922	Lsm12	LSM12 homolog (S. cerevisiae) [Source:MGI Symbol;Acc:MGI:1919592]	2.27381	2.86421e-22	1.97973	9.93211e-30	1.8389	5.37678e-23
ENSG00000114796	KLHL24	kelch-like family member 24 [Source:HGNC Symbol;Acc:HGNC:25947]	1.61169	0.000521334		ENSMUSG00000062901	Klhl24	kelch-like 24 [Source:MGI Symbol;Acc:MGI:1923035]	0.60188	1.33867e-08	1.07079	0.358027	1.29669	1.09188e-06
ENSG00000197045	GMFB	glia maturation factor, beta [Source:HGNC Symbol;Acc:HGNC:4373]	1.61141	8.31821e-11		ENSMUSG00000062014	Gmfb	glia maturation factor, beta [Source:MGI Symbol;Acc:MGI:1927133]	1.15306	0.104306	0.993625	0.948057	1.14246	0.00347041
ENSG00000150403	TMCO3	transmembrane and coiled-coil domains 3 [Source:HGNC Symbol;Acc:HGNC:20329]	1.61104	7.70324e-11		ENSMUSG00000038497	Tmco3	transmembrane and coiled-coil domains 3 [Source:MGI Symbol;Acc:MGI:2444946]	1.10112	0.432327	0.882106	0.0870645	1.00201	0.982367
ENSG00000106397	PLOD3	procollagen-lysine, 2-oxoglutarate 5-dioxygenase 3 [Source:HGNC Symbol;Acc:HGNC:9083]	1.61068	1.34065e-07		ENSMUSG00000004846	Plod3	procollagen-lysine, 2-oxoglutarate 5-dioxygenase 3 [Source:MGI Symbol;Acc:MGI:1347008]	1.11961	0.129134	1.11952	0.0988949	1.21402	0.000376236
ENSG00000100147	CCDC134	coiled-coil domain containing 134 [Source:HGNC Symbol;Acc:HGNC:26185]	1.61056	0.0108901		ENSMUSG00000068114	Ccdc134	coiled-coil domain containing 134 [Source:MGI Symbol;Acc:MGI:1923707]	1.06862	0.741471	0.88567	0.347102	0.922877	0.568406
ENSG00000085978	ATG16L1	autophagy related 16-like 1 [Source:HGNC Symbol;Acc:HGNC:21498]	1.60976	8.02446e-07		ENSMUSG00000026289	Atg16l1	autophagy related 16-like 1 (S. cerevisiae) [Source:MGI Symbol;Acc:MGI:1924290]	0.754404	0.00205059	0.939181	0.398236	0.976282	0.781723
ENSG00000100364	KIAA0930	KIAA0930 [Source:HGNC Symbol;Acc:HGNC:1314]	1.60966	2.00147e-10		ENSMUSG00000036046	5031439G07Rik	RIKEN cDNA 5031439G07 gene [Source:MGI Symbol;Acc:MGI:2444899]	1.4097	6.9335e-06	1.28036	4.31017e-07	1.34346	2.5788e-11
ENSG00000085415	SEH1L	SEH1-like nucleoporin [Source:HGNC Symbol;Acc:HGNC:30379]	1.60882	3.59613e-10		ENSMUSG00000079614	Seh1l	SEH1-like (S. cerevisiae [Source:MGI Symbol;Acc:MGI:1919374]	0.984861	0.891297	0.89384	0.127034	1.14683	0.0118947
ENSG00000161547	SRSF2	serine/arginine-rich splicing factor 2 [Source:HGNC Symbol;Acc:HGNC:10783]	1.60823	3.63253e-05		ENSMUSG00000034120	Srsf2	serine/arginine-rich splicing factor 2 [Source:MGI Symbol;Acc:MGI:98284]	0.938448	0.659519	1.04732	0.514099	1.1633	0.00161998
ENSG00000063587	ZNF275	zinc finger protein 275 [Source:HGNC Symbol;Acc:HGNC:13069]	1.60804	8.68398e-08		ENSMUSG00000031365	Zfp275	zinc finger protein 275 [Source:MGI Symbol;Acc:MGI:1350985]	1.08575	0.617673	1.12916	0.0968799	0.927815	0.318473
ENSG00000015153	YAF2	YY1 associated factor 2 [Source:HGNC Symbol;Acc:HGNC:17363]	1.60768	1.22266e-05		ENSMUSG00000022634	Yaf2	YY1 associated factor 2 [Source:MGI Symbol;Acc:MGI:1914307]	1.28584	0.00852157	1.3795	6.0338e-08	1.34775	1.00683e-06
ENSG00000256235	SMIM3	small integral membrane protein 3 [Source:HGNC Symbol;Acc:HGNC:30248]	1.60697	0.000121414		ENSMUSG00000038059	Smim3	small integral membrane protein 3 [Source:MGI Symbol;Acc:MGI:1917088]	1.92545	0.000870418	1.30341	0.407096	1.2491	0.321818
ENSG00000203952	CCDC160	coiled-coil domain containing 160 [Source:HGNC Symbol;Acc:HGNC:37286]	1.60687	1.87321e-05		ENSMUSG00000073207	Ccdc160	coiled-coil domain containing 160 [Source:MGI Symbol;Acc:MGI:3588225]	0.390337	9.35336e-05	0.596724	0.0660293	0.422843	2.04404e-06
ENSG00000198833	UBE2J1	ubiquitin-conjugating enzyme E2, J1 [Source:HGNC Symbol;Acc:HGNC:17598]	1.60607	2.4842e-16		ENSMUSG00000028277	Ube2j1	ubiquitin-conjugating enzyme E2J 1 [Source:MGI Symbol;Acc:MGI:1926245]	1.71438	1.59269e-08	2.19843	5.01988e-45	1.79716	5.74966e-31
ENSG00000212283	SNORD89	small nucleolar RNA, C/D box 89 [Source:HGNC Symbol;Acc:HGNC:32750]	1.60543	0.470379		ENSMUSG00000077704	Snord89	small nucleolar RNA, C/D box 89 [Source:MGI Symbol;Acc:MGI:3819562]	2.1977	0.184364	1.66977	0.329123	1.00887	0.992757
ENSG00000166598	HSP90B1	heat shock protein 90kDa beta (Grp94), member 1 [Source:HGNC Symbol;Acc:HGNC:12028]	1.6054	2.21302e-09		ENSMUSG00000020048	Hsp90b1	heat shock protein 90, beta (Grp94), member 1 [Source:MGI Symbol;Acc:MGI:98817]	1.33474	0.00013528	1.29104	7.2332e-07	1.18535	0.00011464
ENSG00000102786	INTS6	integrator complex subunit 6 [Source:HGNC Symbol;Acc:HGNC:14879]	1.60526	1.10449e-06		ENSMUSG00000035161	Ints6	integrator complex subunit 6 [Source:MGI Symbol;Acc:MGI:1202397]	0.783467	0.0213119	1.17368	0.13445	1.00264	0.986143
ENSG00000107404	DVL1	dishevelled segment polarity protein 1 [Source:HGNC Symbol;Acc:HGNC:3084]	1.60521	1.12377e-06		ENSMUSG00000029071	Dvl1	dishevelled, dsh homolog 1 (Drosophila) [Source:MGI Symbol;Acc:MGI:94941]	1.38094	1.57916e-06	1.5146	6.80737e-16	1.49832	2.8946e-17
ENSG00000166086	JAM3	junctional adhesion molecule 3 [Source:HGNC Symbol;Acc:HGNC:15532]	1.60495	3.17195e-06		ENSMUSG00000031990	Jam3	junction adhesion molecule 3 [Source:MGI Symbol;Acc:MGI:1933825]	1.40153	0.00785777	1.19183	0.00929429	1.11151	0.135946
ENSG00000091039	OSBPL8	oxysterol binding protein-like 8 [Source:HGNC Symbol;Acc:HGNC:16396]	1.60478	2.47542e-05		ENSMUSG00000020189	Osbpl8	oxysterol binding protein-like 8 [Source:MGI Symbol;Acc:MGI:2443807]	1.52233	6.57126e-05	1.31323	4.80987e-08	1.27134	1.28798e-05
ENSG00000143753	DEGS1	delta(4)-desaturase, sphingolipid 1 [Source:HGNC Symbol;Acc:HGNC:13709]	1.60457	1.87465e-06		ENSMUSG00000038633	Degs1	degenerative spermatocyte homolog 1 (Drosophila) [Source:MGI Symbol;Acc:MGI:1097711]	1.52635	3.22687e-06	1.29566	9.92423e-06	1.19399	0.000446854
ENSG00000124209	RAB22A	RAB22A, member RAS oncogene family [Source:HGNC Symbol;Acc:HGNC:9764]	1.60436	3.18257e-17		ENSMUSG00000027519	Rab22a	RAB22A, member RAS oncogene family [Source:MGI Symbol;Acc:MGI:105072]	1.03016	0.880946	1.06881	0.373455	1.36991	1.51014e-11
ENSG00000096717	SIRT1	sirtuin 1 [Source:HGNC Symbol;Acc:HGNC:14929]	1.60435	0.000645343		ENSMUSG00000020063	Sirt1	sirtuin 1 [Source:MGI Symbol;Acc:MGI:2135607]	1.03853	0.908113	0.946978	0.553635	0.955121	0.625826
ENSG00000121621	KIF18A	kinesin family member 18A [Source:HGNC Symbol;Acc:HGNC:29441]	1.60419	0.00054187		ENSMUSG00000027115	Kif18a	kinesin family member 18A [Source:MGI Symbol;Acc:MGI:2446977]	18.6832	2.11403e-111	6.38801	1.5148e-22	4.02994	4.09692e-31
ENSG00000113575	PPP2CA	protein phosphatase 2, catalytic subunit, alpha isozyme [Source:HGNC Symbol;Acc:HGNC:9299]	1.60314	5.55876e-05		ENSMUSG00000020349	Ppp2ca	protein phosphatase 2 (formerly 2A), catalytic subunit, alpha isoform [Source:MGI Symbol;Acc:MGI:1321159]	1.64534	2.43439e-13	1.89173	4.44997e-37	1.32618	9.16773e-11
ENSG00000119669	IRF2BPL	interferon regulatory factor 2 binding protein-like [Source:HGNC Symbol;Acc:HGNC:14282]	1.60257	2.60832e-06		ENSMUSG00000034168	Irf2bpl	interferon regulatory factor 2 binding protein-like [Source:MGI Symbol;Acc:MGI:2442463]	1.79479	4.78231e-08	2.49643	1.13112e-08	1.62102	2.59798e-18
ENSG00000061337	LZTS1	leucine zipper, putative tumor suppressor 1 [Source:HGNC Symbol;Acc:HGNC:13861]	1.60232	7.45021e-09		ENSMUSG00000036306	Lzts1	leucine zipper, putative tumor suppressor 1 [Source:MGI Symbol;Acc:MGI:2684762]	0.548493	9.18417e-13	0.418715	3.52235e-45	0.759281	0.0169373
ENSG00000101367	MAPRE1	microtubule-associated protein, RP/EB family, member 1 [Source:HGNC Symbol;Acc:HGNC:6890]	1.60228	1.81016e-14		ENSMUSG00000027479	Mapre1	microtubule-associated protein, RP/EB family, member 1 [Source:MGI Symbol;Acc:MGI:891995]	1.28344	6.60846e-07	1.13252	0.0174597	1.27423	6.70561e-09
ENSG00000105821	DNAJC2	DnaJ (Hsp40) homolog, subfamily C, member 2 [Source:HGNC Symbol;Acc:HGNC:13192]	1.60194	0.000101252		ENSMUSG00000029014	Dnajc2	DnaJ (Hsp40) homolog, subfamily C, member 2 [Source:MGI Symbol;Acc:MGI:99470]	0.820438	0.0426196	0.640772	5.06677e-12	0.704138	1.16522e-06
ENSG00000102007	PLP2	proteolipid protein 2 (colonic epithelium-enriched) [Source:HGNC Symbol;Acc:HGNC:9087]	1.60154	0.0206755		ENSMUSG00000031146	Plp2	proteolipid protein 2 [Source:MGI Symbol;Acc:MGI:1298382]	1.18512	0.315989	0.956284	0.813235	1.22888	0.0138182
ENSG00000168275	COA6	cytochrome c oxidase assembly factor 6 [Source:HGNC Symbol;Acc:HGNC:18025]	1.60086	1.97712e-05		ENSMUSG00000051671	Coa6	cytochrome c oxidase assembly factor 6 [Source:MGI Symbol;Acc:MGI:1915142]	0.675333	0.00240997	0.672455	0.00400231	0.861204	0.333227
ENSG00000172292	CERS6	ceramide synthase 6 [Source:HGNC Symbol;Acc:HGNC:23826]	1.60004	1.15641e-05		ENSMUSG00000027035	Cers6	ceramide synthase 6 [Source:MGI Symbol;Acc:MGI:2442564]	1.6114	0.000216568	1.55787	5.03185e-17	1.48151	2.84051e-10
ENSG00000162236	STX5	syntaxin 5 [Source:HGNC Symbol;Acc:HGNC:11440]	1.60001	3.56654e-07		ENSMUSG00000010110	Stx5a	syntaxin 5A [Source:MGI Symbol;Acc:MGI:1928483]	2.75179	8.72335e-56	2.20988	7.80116e-53	1.57075	1.7418e-20
ENSG00000146232	NFKBIE	nuclear factor of kappa light polypeptide gene enhancer in B-cells inhibitor, epsilon [Source:HGNC Symbol;Acc:HGNC:7799]	1.6	3.07153e-05		ENSMUSG00000023947	Nfkbie	nuclear factor of kappa light polypeptide gene enhancer in B cells inhibitor, epsilon [Source:MGI Symbol;Acc:MGI:1194908]	1.84762	0.00498079	1.84262	6.85163e-05	1.24872	0.195746
ENSG00000125868	DSTN	destrin (actin depolymerizing factor) [Source:HGNC Symbol;Acc:HGNC:15750]	1.5994	1.57636e-12		ENSMUSG00000015932	Dstn	destrin [Source:MGI Symbol;Acc:MGI:1929270]	1.58561	7.28322e-16	1.41346	9.69393e-12	1.3339	1.40132e-10
ENSG00000118939	UCHL3	ubiquitin carboxyl-terminal esterase L3 (ubiquitin thiolesterase) [Source:HGNC Symbol;Acc:HGNC:12515]	1.59815	0.000129256		ENSMUSG00000022111	Uchl3	ubiquitin carboxyl-terminal esterase L3 (ubiquitin thiolesterase) [Source:MGI Symbol;Acc:MGI:1355274]	1.2917	0.00724583	1.07367	0.472255	1.04273	0.687395
ENSG00000162616	DNAJB4	DnaJ (Hsp40) homolog, subfamily B, member 4 [Source:HGNC Symbol;Acc:HGNC:14886]	1.59811	0.00665402		ENSMUSG00000028035	Dnajb4	DnaJ (Hsp40) homolog, subfamily B, member 4 [Source:MGI Symbol;Acc:MGI:1914285]	4.47769	6.75155e-87	2.61348	1.14749e-62	1.66348	3.38533e-17
ENSG00000198900	TOP1	topoisomerase (DNA) I [Source:HGNC Symbol;Acc:HGNC:11986]	1.59801	3.64557e-05		ENSMUSG00000070544	Top1	topoisomerase (DNA) I [Source:MGI Symbol;Acc:MGI:98788]	1.64625	4.04126e-09	1.40687	1.50354e-12	1.32717	7.15894e-08
ENSG00000186416	NKRF	NFKB repressing factor [Source:HGNC Symbol;Acc:HGNC:19374]	1.59654	0.00146213		ENSMUSG00000044149	Nkrf	NF-kappaB repressing factor [Source:MGI Symbol;Acc:MGI:1924536]	1.82551	3.01441e-08	2.18301	3.97834e-06	1.39761	1.60752e-07
ENSG00000115310	RTN4	reticulon 4 [Source:HGNC Symbol;Acc:HGNC:14085]	1.59568	6.53746e-08		ENSMUSG00000020458	Rtn4	reticulon 4 [Source:MGI Symbol;Acc:MGI:1915835]	1.12036	0.0965365	1.11909	0.0348635	1.38083	4.37665e-15
ENSG00000040633	PHF23	PHD finger protein 23 [Source:HGNC Symbol;Acc:HGNC:28428]	1.5952	1.44386e-11		ENSMUSG00000018572	Phf23	PHD finger protein 23 [Source:MGI Symbol;Acc:MGI:1925496]	1.16173	0.0829247	1.0542	0.51481	1.24553	0.000207104
ENSG00000176049	JAKMIP2	janus kinase and microtubule interacting protein 2 [Source:HGNC Symbol;Acc:HGNC:29067]	1.59513	0.000175939		ENSMUSG00000024502	Jakmip2	janus kinase and microtubule interacting protein 2 [Source:MGI Symbol;Acc:MGI:1923467]	1.34675	0.0120333	1.03721	0.628933	1.10101	0.130097
ENSG00000071054	MAP4K4	mitogen-activated protein kinase kinase kinase kinase 4 [Source:HGNC Symbol;Acc:HGNC:6866]	1.59461	1.72354e-10		ENSMUSG00000026074	Map4k4	mitogen-activated protein kinase kinase kinase kinase 4 [Source:MGI Symbol;Acc:MGI:1349394]	1.47864	4.18864e-05	1.35086	6.29842e-10	1.49916	1.31298e-24
ENSG00000164164	OTUD4	OTU deubiquitinase 4 [Source:HGNC Symbol;Acc:HGNC:24949]	1.59446	0.00328105		ENSMUSG00000036990	Otud4	OTU domain containing 4 [Source:MGI Symbol;Acc:MGI:1098801]	0.864637	0.10086	1.05038	0.607604	0.991257	0.910506
ENSG00000153015	CWC27	CWC27 spliceosome-associated protein homolog [Source:HGNC Symbol;Acc:HGNC:10664]	1.59407	5.71758e-10		ENSMUSG00000021715	Cwc27	CWC27 spliceosome-associated protein homolog (S. cerevisiae) [Source:MGI Symbol;Acc:MGI:1914535]	1.16467	0.179603	0.984382	0.871492	0.968227	0.793184
ENSG00000157502	MUM1L1	melanoma associated antigen (mutated) 1-like 1 [Source:HGNC Symbol;Acc:HGNC:26583]	1.59388	0.00285893		ENSMUSG00000042515	Mum1l1	melanoma associated antigen (mutated) 1-like 1 [Source:MGI Symbol;Acc:MGI:2445062]	5.3588	1.45306e-29	2.55273	1.89712e-21	1.47785	1.21268e-05
ENSG00000078304	PPP2R5C	protein phosphatase 2, regulatory subunit B', gamma [Source:HGNC Symbol;Acc:HGNC:9311]	1.59302	1.2814e-07		ENSMUSG00000017843	Ppp2r5c	protein phosphatase 2, regulatory subunit B', gamma [Source:MGI Symbol;Acc:MGI:1349475]	1.10093	0.248244	1.28946	2.35426e-05	1.10449	0.0490738
ENSG00000136450	SRSF1	serine/arginine-rich splicing factor 1 [Source:HGNC Symbol;Acc:HGNC:10780]	1.59228	5.2121e-05		ENSMUSG00000018379	Srsf1	serine/arginine-rich splicing factor 1 [Source:MGI Symbol;Acc:MGI:98283]	1.71135	6.32289e-11	1.47001	2.07106e-10	1.10561	0.0300787
ENSG00000106682	EIF4H	eukaryotic translation initiation factor 4H [Source:HGNC Symbol;Acc:HGNC:12741]	1.59189	6.38709e-09		ENSMUSG00000040731	Eif4h	eukaryotic translation initiation factor 4H [Source:MGI Symbol;Acc:MGI:1341822]	1.28661	0.000516205	1.14677	0.0120759	1.29334	5.16212e-10
ENSG00000119048	UBE2B	ubiquitin-conjugating enzyme E2B [Source:HGNC Symbol;Acc:HGNC:12473]	1.5916	1.77131e-07		ENSMUSG00000020390	Ube2b	ubiquitin-conjugating enzyme E2B [Source:MGI Symbol;Acc:MGI:102944]	1.56017	1.92525e-06	1.72312	3.54899e-15	1.32083	3.15453e-08
ENSG00000167680	SEMA6B	sema domain, transmembrane domain (TM), and cytoplasmic domain, (semaphorin) 6B [Source:HGNC Symbol;Acc:HGNC:10739]	1.59136	7.13081e-06		ENSMUSG00000001227	Sema6b	sema domain, transmembrane domain (TM), and cytoplasmic domain, (semaphorin) 6B [Source:MGI Symbol;Acc:MGI:1202889]	0.684181	0.000731746	0.508865	2.77756e-32	0.73512	1.30897e-05
ENSG00000134186	PRPF38B	pre-mRNA processing factor 38B [Source:HGNC Symbol;Acc:HGNC:25512]	1.59111	4.95131e-05		ENSMUSG00000027881	Prpf38b	PRP38 pre-mRNA processing factor 38 (yeast) domain containing B [Source:MGI Symbol;Acc:MGI:1914171]	1.47723	5.49374e-08	1.34508	2.29334e-08	1.46162	2.4563e-14
ENSG00000011260	UTP18	UTP18 small subunit (SSU) processome component homolog (yeast) [Source:HGNC Symbol;Acc:HGNC:24274]	1.5909	6.68876e-08		ENSMUSG00000054079	Utp18	UTP18, small subunit (SSU) processome component, homolog (yeast) [Source:MGI Symbol;Acc:MGI:1923402]	0.769188	0.00301715	0.892482	0.155821	0.922496	0.313935
ENSG00000154370	TRIM11	tripartite motif containing 11 [Source:HGNC Symbol;Acc:HGNC:16281]	1.59084	0.000119569		ENSMUSG00000020455	Trim11	tripartite motif-containing 11 [Source:MGI Symbol;Acc:MGI:2137355]	0.615351	2.41131e-08	0.790028	0.002496	1.1109	0.210534
ENSG00000123136	DDX39A	DEAD (Asp-Glu-Ala-Asp) box polypeptide 39A [Source:HGNC Symbol;Acc:HGNC:17821]	1.59073	0.000358978		ENSMUSG00000005481	Ddx39	DEAD (Asp-Glu-Ala-Asp) box polypeptide 39 [Source:MGI Symbol;Acc:MGI:1915528]	0.969758	0.862998	0.745705	1.05351e-05	1.0322	0.705526
ENSG00000116752	BCAS2	breast carcinoma amplified sequence 2 [Source:HGNC Symbol;Acc:HGNC:975]	1.59048	0.000122373		ENSMUSG00000005687	Bcas2	breast carcinoma amplified sequence 2 [Source:MGI Symbol;Acc:MGI:1915433]	1.20135	0.0244412	1.15981	0.0137822	1.11288	0.0690604
ENSG00000163466	ARPC2	actin related protein 2/3 complex, subunit 2, 34kDa [Source:HGNC Symbol;Acc:HGNC:705]	1.59046	5.98169e-14		ENSMUSG00000006304	Arpc2	actin related protein 2/3 complex, subunit 2 [Source:MGI Symbol;Acc:MGI:1923959]	1.3477	0.000911458	1.17396	0.00561957	1.26196	1.10245e-07
ENSG00000070423	RNF126	ring finger protein 126 [Source:HGNC Symbol;Acc:HGNC:21151]	1.5901	4.11145e-05		ENSMUSG00000035890	Rnf126	ring finger protein 126 [Source:MGI Symbol;Acc:MGI:1917544]	1.01211	0.946798	1.01355	0.902922	1.26918	6.81298e-05
ENSG00000122824	NUDT10	nudix (nucleoside diphosphate linked moiety X)-type motif 10 [Source:HGNC Symbol;Acc:HGNC:17621]	1.58971	2.90757e-05		ENSMUSG00000073293	Nudt10	nudix (nucleoside diphosphate linked moiety X)-type motif 10 [Source:MGI Symbol;Acc:MGI:2147931]	1.13783	0.394417	0.924816	0.398593	1.05615	0.62044
ENSG00000176624	MEX3C	mex-3 RNA binding family member C [Source:HGNC Symbol;Acc:HGNC:28040]	1.58883	6.60696e-06		ENSMUSG00000037253	Mex3c	mex3 homolog C (C. elegans) [Source:MGI Symbol;Acc:MGI:2652843]	2.23449	7.26716e-18	1.86145	2.16754e-36	1.57273	3.20171e-19
ENSG00000174749	C4orf32	chromosome 4 open reading frame 32 [Source:HGNC Symbol;Acc:HGNC:26813]	1.58833	0.000232335		ENSMUSG00000050549	5730508B09Rik	RIKEN cDNA 5730508B09 gene [Source:MGI Symbol;Acc:MGI:1917867]	1.10274	0.557414	1.12754	0.526398	1.27643	0.311567
ENSG00000171357	LURAP1	leucine rich adaptor protein 1 [Source:HGNC Symbol;Acc:HGNC:32327]	1.58819	0.041713		ENSMUSG00000028701	Lurap1	leucine rich adaptor protein 1 [Source:MGI Symbol;Acc:MGI:1915325]	1.63079	0.00128794	1.51815	0.00012494	0.864888	0.256851
ENSG00000133703	KRAS	Kirsten rat sarcoma viral oncogene homolog [Source:HGNC Symbol;Acc:HGNC:6407]	1.58779	7.9987e-09		ENSMUSG00000030265	Kras	v-Ki-ras2 Kirsten rat sarcoma viral oncogene homolog [Source:MGI Symbol;Acc:MGI:96680]	1.35654	0.000119879	1.26948	5.21273e-06	1.13351	0.0237102
ENSG00000110435	PDHX	pyruvate dehydrogenase complex, component X [Source:HGNC Symbol;Acc:HGNC:21350]	1.5877	2.29543e-05		ENSMUSG00000010914	Pdhx	pyruvate dehydrogenase complex, component X [Source:MGI Symbol;Acc:MGI:1351627]	0.759069	1.56545e-05	0.834102	0.00572874	0.880838	0.0505597
ENSG00000095209	TMEM38B	transmembrane protein 38B [Source:HGNC Symbol;Acc:HGNC:25535]	1.58622	6.64942e-07		ENSMUSG00000028420	Tmem38b	transmembrane protein 38B [Source:MGI Symbol;Acc:MGI:1098718]	1.19602	0.166622	1.39509	0.0151605	1.11911	0.400046
ENSG00000160551	TAOK1	TAO kinase 1 [Source:HGNC Symbol;Acc:HGNC:29259]	1.5855	4.35674e-05		ENSMUSG00000017291	Taok1	TAO kinase 1 [Source:MGI Symbol;Acc:MGI:1914490]	0.773874	0.0142296	0.950096	0.438978	0.969622	0.648798
ENSG00000062194	GPBP1	GC-rich promoter binding protein 1 [Source:HGNC Symbol;Acc:HGNC:29520]	1.58545	2.15696e-09		ENSMUSG00000032745	Gpbp1	GC-rich promoter binding protein 1 [Source:MGI Symbol;Acc:MGI:1920524]	1.24957	0.0118034	1.6511	1.17785e-18	1.38167	1.24421e-11
ENSG00000100852	ARHGAP5	Rho GTPase activating protein 5 [Source:HGNC Symbol;Acc:HGNC:675]	1.58521	0.000787437		ENSMUSG00000035133	Arhgap5	Rho GTPase activating protein 5 [Source:MGI Symbol;Acc:MGI:1332637]	1.31913	0.00337382	1.46708	2.94286e-14	1.06902	0.273273
ENSG00000017797	RALBP1	ralA binding protein 1 [Source:HGNC Symbol;Acc:HGNC:9841]	1.5848	1.90205e-10		ENSMUSG00000024096	Ralbp1	ralA binding protein 1 [Source:MGI Symbol;Acc:MGI:108466]	1.34626	0.00437354	1.82449	0.0279624	1.52533	2.99505e-16
ENSG00000138623	SEMA7A	semaphorin 7A, GPI membrane anchor (John Milton Hagen blood group) [Source:HGNC Symbol;Acc:HGNC:10741]	1.5834	7.78466e-08		ENSMUSG00000038264	Sema7a	sema domain, immunoglobulin domain (Ig), and GPI membrane anchor, (semaphorin) 7A [Source:MGI Symbol;Acc:MGI:1306826]	0.765008	0.0390938	0.426681	4.78232e-51	1.5619	5.81085e-13
ENSG00000150787	PTS	6-pyruvoyltetrahydropterin synthase [Source:HGNC Symbol;Acc:HGNC:9689]	1.58289	4.91931e-12		ENSMUSG00000032067	Pts	6-pyruvoyl-tetrahydropterin synthase [Source:MGI Symbol;Acc:MGI:1338783]	0.957434	0.808145	0.812547	0.0271463	0.825165	0.0989168
ENSG00000198478	SH3BGRL2	SH3 domain binding glutamate-rich protein like 2 [Source:HGNC Symbol;Acc:HGNC:15567]	1.58276	4.50933e-07		ENSMUSG00000032261	Sh3bgrl2	SH3 domain binding glutamic acid-rich protein like 2 [Source:MGI Symbol;Acc:MGI:1915350]	1.0371	0.88661	1.22921	0.0140217	1.31668	0.00202337
ENSG00000163902	RPN1	ribophorin I [Source:HGNC Symbol;Acc:HGNC:10381]	1.58243	6.10886e-10		ENSMUSG00000030062	Rpn1	ribophorin I [Source:MGI Symbol;Acc:MGI:98084]	1.11514	0.302155	1.14136	0.0187731	1.239	8.29583e-07
ENSG00000139880	CDH24	cadherin 24, type 2 [Source:HGNC Symbol;Acc:HGNC:14265]	1.5822	0.016978		ENSMUSG00000059674	Cdh24	cadherin-like 24 [Source:MGI Symbol;Acc:MGI:1928330]	1.08135	0.792602	1.30873	0.00590349	1.15661	0.0833581
ENSG00000105401	CDC37	cell division cycle 37 [Source:HGNC Symbol;Acc:HGNC:1735]	1.58191	5.21265e-07		ENSMUSG00000019471	Cdc37	cell division cycle 37 [Source:MGI Symbol;Acc:MGI:109531]	1.2341	0.0899214	1.03506	0.684049	1.33053	1.68883e-09
ENSG00000164713	BRI3	brain protein I3 [Source:HGNC Symbol;Acc:HGNC:1109]	1.58187	1.38768e-06		ENSMUSG00000047843	Bri3	brain protein I3 [Source:MGI Symbol;Acc:MGI:1933174]	1.41111	0.0125496	1.10666	0.37264	1.69593	2.77704e-12
ENSG00000100242	SUN2	Sad1 and UNC84 domain containing 2 [Source:HGNC Symbol;Acc:HGNC:14210]	1.5815	3.07153e-05		ENSMUSG00000042524	Sun2	Sad1 and UNC84 domain containing 2 [Source:MGI Symbol;Acc:MGI:2443011]	1.48251	0.000349639	0.847292	0.00706068	1.61914	4.19979e-13
ENSG00000179562	GCC1	GRIP and coiled-coil domain containing 1 [Source:HGNC Symbol;Acc:HGNC:19095]	1.58078	2.06031e-06		ENSMUSG00000029708	Gcc1	golgi coiled coil 1 [Source:MGI Symbol;Acc:MGI:1921625]	1.58269	1.48258e-05	1.0489	0.66769	1.26222	0.0012641
ENSG00000105202	FBL	fibrillarin [Source:HGNC Symbol;Acc:HGNC:3599]	1.58037	1.26129e-06		ENSMUSG00000046865	Fbl	fibrillarin [Source:MGI Symbol;Acc:MGI:95486]	4.00611	4.31136e-57	2.91184	2.54815e-91	2.19837	3.79831e-33
ENSG00000060069	CTDP1	CTD (carboxy-terminal domain, RNA polymerase II, polypeptide A) phosphatase, subunit 1 [Source:HGNC Symbol;Acc:HGNC:2498]	1.57981	2.30511e-07		ENSMUSG00000033323	Ctdp1	CTD (carboxy-terminal domain, RNA polymerase II, polypeptide A) phosphatase, subunit 1 [Source:MGI Symbol;Acc:MGI:1926953]	2.43	2.08785e-23	1.66072	2.42033e-17	1.91815	3.28655e-19
ENSG00000101216	GMEB2	glucocorticoid modulatory element binding protein 2 [Source:HGNC Symbol;Acc:HGNC:4371]	1.57925	4.16997e-11		ENSMUSG00000038705	Gmeb2	glucocorticoid modulatory element binding protein 2 [Source:MGI Symbol;Acc:MGI:2652836]	3.29864	5.97747e-38	2.68516	3.78071e-68	2.34498	3.77995e-35
ENSG00000006712	PAF1	PAF1 homolog, Paf1/RNA polymerase II complex component [Source:HGNC Symbol;Acc:HGNC:25459]	1.57856	9.2725e-13		ENSMUSG00000003437	Paf1	Paf1, RNA polymerase II associated factor, homolog (S. cerevisiae) [Source:MGI Symbol;Acc:MGI:1923988]	1.36249	7.86799e-05	1.30835	1.16502e-06	1.24301	6.44792e-05
ENSG00000108946	PRKAR1A	protein kinase, cAMP-dependent, regulatory, type I, alpha [Source:HGNC Symbol;Acc:HGNC:9388]	1.57855	1.52061e-06		ENSMUSG00000020612	Prkar1a	protein kinase, cAMP dependent regulatory, type I, alpha [Source:MGI Symbol;Acc:MGI:104878]	1.2033	0.00184751	1.3493	1.32013e-08	1.41678	1.35285e-18
ENSG00000123374	CDK2	cyclin-dependent kinase 2 [Source:HGNC Symbol;Acc:HGNC:1771]	1.57838	6.1339e-06		ENSMUSG00000025358	Cdk2	cyclin-dependent kinase 2 [Source:MGI Symbol;Acc:MGI:104772]	1.78855	0.00138793	1.1261	0.24808	1.36374	9.1973e-05
ENSG00000186862	PDZD7	PDZ domain containing 7 [Source:HGNC Symbol;Acc:HGNC:26257]	1.57817	0.00108295		ENSMUSG00000074818	Pdzd7	PDZ domain containing 7 [Source:MGI Symbol;Acc:MGI:3608325]	1.05392	0.91238	1.24304	0.229609	1.75628	0.000728128
ENSG00000143549	TPM3	tropomyosin 3 [Source:HGNC Symbol;Acc:HGNC:12012]	1.57791	6.07562e-14		ENSMUSG00000027940	Tpm3	tropomyosin 3, gamma [Source:MGI Symbol;Acc:MGI:1890149]	1.63545	1.97964e-15	1.47538	6.55959e-15	1.21928	1.68112e-05
ENSG00000176095	IP6K1	inositol hexakisphosphate kinase 1 [Source:HGNC Symbol;Acc:HGNC:18360]	1.57751	4.17602e-05		ENSMUSG00000032594	Ip6k1	inositol hexaphosphate kinase 1 [Source:MGI Symbol;Acc:MGI:1351633]	1.10297	0.18538	1.31527	2.41545e-06	1.27328	3.89735e-08
ENSG00000188895	MSL1	male-specific lethal 1 homolog (Drosophila) [Source:HGNC Symbol;Acc:HGNC:27905]	1.57743	4.99287e-10		ENSMUSG00000052915	Msl1	male-specific lethal 1 homolog (Drosophila) [Source:MGI Symbol;Acc:MGI:1921276]	0.98006	0.833295	1.06278	0.377479	1.23249	2.708e-06
ENSG00000088986	DYNLL1	dynein, light chain, LC8-type 1 [Source:HGNC Symbol;Acc:HGNC:15476]	1.57724	4.38423e-09		ENSMUSG00000009013	Dynll1	dynein light chain LC8-type 1 [Source:MGI Symbol;Acc:MGI:1861457]	1.11196	0.392882	0.966764	0.73053	1.24051	3.47825e-06
ENSG00000147224	PRPS1	phosphoribosyl pyrophosphate synthetase 1 [Source:HGNC Symbol;Acc:HGNC:9462]	1.57704	0.000386693		ENSMUSG00000031432	Prps1	phosphoribosyl pyrophosphate synthetase 1 [Source:MGI Symbol;Acc:MGI:97775]	1.1404	0.148278	1.02098	0.825459	1.029	0.722029
ENSG00000146856	AGBL3	ATP/GTP binding protein-like 3 [Source:HGNC Symbol;Acc:HGNC:27981]	1.57678	8.90185e-05		ENSMUSG00000038836	Agbl3	ATP/GTP binding protein-like 3 [Source:MGI Symbol;Acc:MGI:1923473]	0.679918	0.000143601	0.790517	0.0393804	0.613415	1.73908e-05
ENSG00000125266	EFNB2	ephrin-B2 [Source:HGNC Symbol;Acc:HGNC:3227]	1.57661	0.000349958		ENSMUSG00000001300	Efnb2	ephrin B2 [Source:MGI Symbol;Acc:MGI:105097]	1.56723	1.42799e-06	1.3863	0.0551043	1.65892	5.22641e-26
ENSG00000011405	PIK3C2A	phosphatidylinositol-4-phosphate 3-kinase, catalytic subunit type 2 alpha [Source:HGNC Symbol;Acc:HGNC:8971]	1.57634	0.000472626		ENSMUSG00000030660	Pik3c2a	phosphatidylinositol 3-kinase, C2 domain containing, alpha polypeptide [Source:MGI Symbol;Acc:MGI:1203729]	2.13428	9.47624e-10	1.80035	2.27928e-30	1.43321	7.60532e-11
ENSG00000146676	PURB	purine-rich element binding protein B [Source:HGNC Symbol;Acc:HGNC:9702]	1.57607	6.83783e-05		ENSMUSG00000094483	Purb	purine rich element binding protein B [Source:MGI Symbol;Acc:MGI:1338779]	1.36976	0.000140076	2.1885	1.95917e-60	1.65715	8.63365e-29
ENSG00000197965	MPZL1	myelin protein zero-like 1 [Source:HGNC Symbol;Acc:HGNC:7226]	1.57593	5.18657e-10		ENSMUSG00000026566	Mpzl1	myelin protein zero-like 1 [Source:MGI Symbol;Acc:MGI:1915731]	1.14332	0.0909282	0.902402	0.254169	1.11001	0.0561625
ENSG00000004478	FKBP4	FK506 binding protein 4, 59kDa [Source:HGNC Symbol;Acc:HGNC:3720]	1.57532	2.61365e-08		ENSMUSG00000030357	Fkbp4	FK506 binding protein 4 [Source:MGI Symbol;Acc:MGI:95543]	0.842736	0.0908183	0.804874	2.29927e-05	0.876993	0.00835853
ENSG00000254585	MAGEL2	melanoma antigen family L2 [Source:HGNC Symbol;Acc:HGNC:6814]	1.57518	7.04532e-06		ENSMUSG00000056972	Magel2	melanoma antigen, family L, 2 [Source:MGI Symbol;Acc:MGI:1351648]	4.79141	2.76694e-50	5.72936	1.0724e-82	3.2962	1.34778e-114
ENSG00000170500	LONRF2	LON peptidase N-terminal domain and ring finger 2 [Source:HGNC Symbol;Acc:HGNC:24788]	1.57496	0.000980385		ENSMUSG00000048814	Lonrf2	LON peptidase N-terminal domain and ring finger 2 [Source:MGI Symbol;Acc:MGI:1920209]	0.663127	3.6451e-07	0.670446	8.44024e-10	0.626557	3.80905e-23
ENSG00000184545	DUSP8	dual specificity phosphatase 8 [Source:HGNC Symbol;Acc:HGNC:3074]	1.5746	5.06918e-06		ENSMUSG00000037887	Dusp8	dual specificity phosphatase 8 [Source:MGI Symbol;Acc:MGI:106626]	1.71017	1.91616e-08	1.76008	2.08941e-18	1.50066	4.67261e-14
ENSG00000109572	CLCN3	chloride channel, voltage-sensitive 3 [Source:HGNC Symbol;Acc:HGNC:2021]	1.57397	4.03978e-06		ENSMUSG00000004319	Clcn3	chloride channel 3 [Source:MGI Symbol;Acc:MGI:103555]	2.08949	9.66831e-22	2.16839	2.55432e-37	1.5066	4.83816e-13
ENSG00000257218	GATC	glutamyl-tRNA(Gln) amidotransferase, subunit C [Source:HGNC Symbol;Acc:HGNC:25068]	1.57393	1.18285e-05		ENSMUSG00000029536	Gatc	glutamyl-tRNA(Gln) amidotransferase, subunit C [Source:MGI Symbol;Acc:MGI:1923776]	1.0711	0.431167	1.26648	0.00416031	0.903072	0.195217
ENSG00000172346	CSDC2	cold shock domain containing C2, RNA binding [Source:HGNC Symbol;Acc:HGNC:30359]	1.57361	7.35073e-07		ENSMUSG00000042109	Csdc2	cold shock domain containing C2, RNA binding [Source:MGI Symbol;Acc:MGI:2146027]	1.21386	0.0042056	1.23268	8.52987e-05	1.37848	3.68379e-13
ENSG00000168807	SNTB2	syntrophin, beta 2 (dystrophin-associated protein A1, 59kDa, basic component 2) [Source:HGNC Symbol;Acc:HGNC:11169]	1.57317	0.0089095		ENSMUSG00000041308	Sntb2	syntrophin, basic 2 [Source:MGI Symbol;Acc:MGI:101771]	3.08381	1.09537e-15	2.21362	9.20706e-19	2.08308	3.76048e-24
ENSG00000171044	XKR6	XK, Kell blood group complex subunit-related family, member 6 [Source:HGNC Symbol;Acc:HGNC:27806]	1.57317	0.00615314		ENSMUSG00000035067	Xkr6	X Kell blood group precursor related family member 6 homolog [Source:MGI Symbol;Acc:MGI:2447765]	1.92944	9.48223e-06	1.13369	0.178059	1.52985	8.51216e-05
ENSG00000101109	STK4	serine/threonine kinase 4 [Source:HGNC Symbol;Acc:HGNC:11408]	1.57282	7.23397e-06		ENSMUSG00000018209	Stk4	serine/threonine kinase 4 [Source:MGI Symbol;Acc:MGI:1929004]	0.562711	7.11377e-13	0.74543	4.10156e-07	1.08377	0.222937
ENSG00000111596	CNOT2	CCR4-NOT transcription complex, subunit 2 [Source:HGNC Symbol;Acc:HGNC:7878]	1.57249	2.07337e-05		ENSMUSG00000020166	Cnot2	CCR4-NOT transcription complex, subunit 2 [Source:MGI Symbol;Acc:MGI:1919318]	0.860362	0.0808535	0.936218	0.322555	1.00579	0.96394
ENSG00000165476	REEP3	receptor accessory protein 3 [Source:HGNC Symbol;Acc:HGNC:23711]	1.57239	0.000230376		ENSMUSG00000019873	Reep3	receptor accessory protein 3 [Source:MGI Symbol;Acc:MGI:88930]	1.65329	3.30028e-06	1.31899	8.15823e-07	1.43125	1.42676e-12
ENSG00000105085	MED26	mediator complex subunit 26 [Source:HGNC Symbol;Acc:HGNC:2376]	1.57233	0.000148742		ENSMUSG00000045248	Med26	mediator complex subunit 26 [Source:MGI Symbol;Acc:MGI:1917875]	2.25192	2.46111e-10	1.67129	2.3452e-10	1.58892	6.13065e-08
ENSG00000075413	MARK3	MAP/microtubule affinity-regulating kinase 3 [Source:HGNC Symbol;Acc:HGNC:6897]	1.57229	1.07744e-07		ENSMUSG00000007411	Mark3	MAP/microtubule affinity regulating kinase 3 [Source:MGI Symbol;Acc:MGI:1341865]	1.26204	0.000339962	1.30902	9.13478e-07	1.23407	5.00437e-06
ENSG00000137449	CPEB2	cytoplasmic polyadenylation element binding protein 2 [Source:HGNC Symbol;Acc:HGNC:21745]	1.57107	0.00123568		ENSMUSG00000039782	Cpeb2	cytoplasmic polyadenylation element binding protein 2 [Source:MGI Symbol;Acc:MGI:2442640]	2.21274	3.35119e-07	3.06817	1.96776e-83	1.51923	1.1419e-12
ENSG00000082153	BZW1	basic leucine zipper and W2 domains 1 [Source:HGNC Symbol;Acc:HGNC:18380]	1.57105	3.6048e-08		ENSMUSG00000051223	Bzw1	basic leucine zipper and W2 domains 1 [Source:MGI Symbol;Acc:MGI:1914132]	1.03393	0.690257	1.04976	0.440894	1.11975	0.00945821
ENSG00000105227	PRX	periaxin [Source:HGNC Symbol;Acc:HGNC:13797]	1.57082	0.0438617		ENSMUSG00000053198	Prx	periaxin [Source:MGI Symbol;Acc:MGI:108176]	1.9324	9.45975e-05	1.24073	0.270987	1.48613	0.000145418
ENSG00000067334	DNTTIP2	deoxynucleotidyltransferase, terminal, interacting protein 2 [Source:HGNC Symbol;Acc:HGNC:24013]	1.57078	0.000303552		ENSMUSG00000039756	Dnttip2	deoxynucleotidyltransferase, terminal, interacting protein 2 [Source:MGI Symbol;Acc:MGI:1923173]	1.31593	0.00029247	1.08482	0.293109	1.07938	0.297508
ENSG00000168000	BSCL2	Berardinelli-Seip congenital lipodystrophy 2 (seipin) [Source:HGNC Symbol;Acc:HGNC:15832]	1.57023	0.00148423		ENSMUSG00000071657	Bscl2	Berardinelli-Seip congenital lipodystrophy 2 homolog (seipin) [Source:MGI Symbol;Acc:MGI:1298392]	1.05498	0.659344	0.969386	0.712689	1.05613	0.454053
ENSG00000124486	USP9X	ubiquitin specific peptidase 9, X-linked [Source:HGNC Symbol;Acc:HGNC:12632]	1.57023	0.000109877		ENSMUSG00000031010	Usp9x	ubiquitin specific peptidase 9, X chromosome [Source:MGI Symbol;Acc:MGI:894681]	1.45149	0.000334231	1.75158	9.49039e-29	1.15662	0.00505147
ENSG00000147050	KDM6A	lysine (K)-specific demethylase 6A [Source:HGNC Symbol;Acc:HGNC:12637]	1.57022	0.00161146		ENSMUSG00000037369	Kdm6a	lysine (K)-specific demethylase 6A [Source:MGI Symbol;Acc:MGI:1095419]	2.73718	4.82719e-18	1.66525	9.58358e-19	1.04019	0.664508
ENSG00000080824	HSP90AA1	heat shock protein 90kDa alpha (cytosolic), class A member 1 [Source:HGNC Symbol;Acc:HGNC:5253]	1.56997	9.93658e-09		ENSMUSG00000021270	Hsp90aa1	heat shock protein 90, alpha (cytosolic), class A member 1 [Source:MGI Symbol;Acc:MGI:96250]	1.30373	9.55982e-07	1.39099	1.18337e-10	1.25374	4.04851e-08
ENSG00000120053	GOT1	glutamic-oxaloacetic transaminase 1, soluble [Source:HGNC Symbol;Acc:HGNC:4432]	1.56955	5.50357e-08		ENSMUSG00000025190	Got1	glutamic-oxaloacetic transaminase 1, soluble [Source:MGI Symbol;Acc:MGI:95791]	1.32015	5.16984e-05	1.14536	0.0376703	1.49903	4.51951e-16
ENSG00000076067	RBMS2	RNA binding motif, single stranded interacting protein 2 [Source:HGNC Symbol;Acc:HGNC:9909]	1.56953	0.000135065		ENSMUSG00000040043	Rbms2	RNA binding motif, single stranded interacting protein 2 [Source:MGI Symbol;Acc:MGI:1861776]	3.29425	8.0449e-25	2.51717	1.74122e-26	1.41463	5.33251e-11
ENSG00000184916	JAG2	jagged 2 [Source:HGNC Symbol;Acc:HGNC:6189]	1.56933	2.77385e-05		ENSMUSG00000002799	Jag2	jagged 2 [Source:MGI Symbol;Acc:MGI:1098270]	0.510014	7.89738e-18	0.468248	1.46331e-33	0.600376	6.90226e-12
ENSG00000168917	SLC35G2	solute carrier family 35, member G2 [Source:HGNC Symbol;Acc:HGNC:28480]	1.56916	9.83874e-05		ENSMUSG00000070287	Slc35g2	solute carrier family 35, member G2 [Source:MGI Symbol;Acc:MGI:2685365]	0.901178	0.69892	0.802152	0.272545	0.547826	8.58946e-10
ENSG00000176428	VPS37D	vacuolar protein sorting 37 homolog D (S. cerevisiae) [Source:HGNC Symbol;Acc:HGNC:18287]	1.56857	3.64827e-06		ENSMUSG00000043614	Vps37d	vacuolar protein sorting 37D (yeast) [Source:MGI Symbol;Acc:MGI:2159402]	0.852891	0.275624	0.693865	1.9193e-06	0.861723	0.129741
ENSG00000189410	SH2D5	SH2 domain containing 5 [Source:HGNC Symbol;Acc:HGNC:28819]	1.56854	0.00114664		ENSMUSG00000045349	Sh2d5	SH2 domain containing 5 [Source:MGI Symbol;Acc:MGI:2446215]	1.00451	0.99866	0.601438	1.96782e-06	1.43007	5.91339e-05
ENSG00000145990	GFOD1	glucose-fructose oxidoreductase domain containing 1 [Source:HGNC Symbol;Acc:HGNC:21096]	1.56802	0.00132645		ENSMUSG00000051335	Gfod1	glucose-fructose oxidoreductase domain containing 1 [Source:MGI Symbol;Acc:MGI:2145304]	1.97357	9.93249e-06	1.11595	0.428268	1.09538	0.251615
ENSG00000130224	LRCH2	leucine-rich repeats and calponin homology (CH) domain containing 2 [Source:HGNC Symbol;Acc:HGNC:29292]	1.56775	1.98295e-05		ENSMUSG00000031290	Lrch2	leucine-rich repeats and calponin homology (CH) domain containing 2 [Source:MGI Symbol;Acc:MGI:2147870]	1.0093	0.969281	0.883243	0.0812366	0.88601	0.10031
ENSG00000187555	USP7	ubiquitin specific peptidase 7 (herpes virus-associated) [Source:HGNC Symbol;Acc:HGNC:12630]	1.56746	1.55841e-10		ENSMUSG00000022710	Usp7	ubiquitin specific peptidase 7 [Source:MGI Symbol;Acc:MGI:2182061]	1.02961	0.773495	1.42099	1.79833e-13	1.26907	1.90506e-07
ENSG00000179632	MAF1	MAF1 homolog, negative regulator of RNA polymerase III [Source:HGNC Symbol;Acc:HGNC:24966]	1.56714	1.17411e-05		ENSMUSG00000022553	Maf1	MAF1 homolog (S. cerevisiae) [Source:MGI Symbol;Acc:MGI:1916127]	0.998216	0.956477	1.05047	0.561203	1.30418	2.67161e-06
ENSG00000085465	OVGP1	oviductal glycoprotein 1, 120kDa [Source:HGNC Symbol;Acc:HGNC:8524]	1.5664	0.00686835		ENSMUSG00000074340	Ovgp1	oviductal glycoprotein 1 [Source:MGI Symbol;Acc:MGI:106661]	1.09168	0.673298	2.06844	6.88941e-10	1.38906	0.0250462
ENSG00000154639	CXADR	coxsackie virus and adenovirus receptor [Source:HGNC Symbol;Acc:HGNC:2559]	1.56618	1.13704e-08		ENSMUSG00000022865	Cxadr	coxsackie virus and adenovirus receptor [Source:MGI Symbol;Acc:MGI:1201679]	1.38033	2.97251e-05	1.53258	1.83723e-18	1.37209	6.9952e-12
ENSG00000104888	SLC17A7	solute carrier family 17 (vesicular glutamate transporter), member 7 [Source:HGNC Symbol;Acc:HGNC:16704]	1.56602	0.00472938		ENSMUSG00000070570	Slc17a7	solute carrier family 17 (sodium-dependent inorganic phosphate cotransporter), member 7 [Source:MGI Symbol;Acc:MGI:1920211]	0.947518	0.737171	0.830787	0.017896	1.13215	0.660731
ENSG00000266297	MIR744	microRNA 744 [Source:HGNC Symbol;Acc:HGNC:33658]	1.566	0.614881		ENSMUSG00000076460	Mir744	microRNA 744 [Source:MGI Symbol;Acc:MGI:3691603]	1.59636	0.746484	1.34153	0.597128	1.18636
ENSG00000178950	GAK	cyclin G associated kinase [Source:HGNC Symbol;Acc:HGNC:4113]	1.56573	7.09772e-07		ENSMUSG00000062234	Gak	cyclin G associated kinase [Source:MGI Symbol;Acc:MGI:2442153]	1.74101	5.78295e-13	2.04006	9.93116e-47	2.01178	6.22125e-43
ENSG00000112290	WASF1	WAS protein family, member 1 [Source:HGNC Symbol;Acc:HGNC:12732]	1.56552	1.7186e-05		ENSMUSG00000019831	Wasf1	WAS protein family, member 1 [Source:MGI Symbol;Acc:MGI:1890563]	1.0164	0.907134	0.906826	0.267667	1.03755	0.640965
ENSG00000145293	ENOPH1	enolase-phosphatase 1 [Source:HGNC Symbol;Acc:HGNC:24599]	1.56506	2.9308e-11		ENSMUSG00000029326	Enoph1	enolase-phosphatase 1 [Source:MGI Symbol;Acc:MGI:1915120]	1.42366	6.40843e-06	1.17691	0.014579	1.44289	1.15741e-08
ENSG00000124380	SNRNP27	small nuclear ribonucleoprotein 27kDa (U4/U6.U5) [Source:HGNC Symbol;Acc:HGNC:30240]	1.56486	4.15617e-07		ENSMUSG00000001158	Snrnp27	small nuclear ribonucleoprotein 27 (U4/U6.U5) [Source:MGI Symbol;Acc:MGI:1913868]	0.90004	0.466766	0.637596	1.09979e-09	0.848363	0.0439982
ENSG00000181588	MEX3D	mex-3 RNA binding family member D [Source:HGNC Symbol;Acc:HGNC:16734]	1.56452	1.36536e-05		ENSMUSG00000048696	Mex3d	mex3 homolog D (C. elegans) [Source:MGI Symbol;Acc:MGI:2681847]	1.10957	0.63351	1.05733	0.505368	1.36368	6.68039e-08
ENSG00000136891	TEX10	testis expressed 10 [Source:HGNC Symbol;Acc:HGNC:25988]	1.56445	0.000191995		ENSMUSG00000028345	Tex10	testis expressed gene 10 [Source:MGI Symbol;Acc:MGI:1344413]	1.2398	0.0315459	1.09957	0.240932	1.15555	0.0309251
ENSG00000106701	FSD1L	fibronectin type III and SPRY domain containing 1-like [Source:HGNC Symbol;Acc:HGNC:13753]	1.56404	5.3031e-13		ENSMUSG00000054752	Fsd1l	fibronectin type III and SPRY domain containing 1-like [Source:MGI Symbol;Acc:MGI:2442443]	0.706644	9.62101e-06	0.634985	1.14924e-18	0.882801	0.0868405
ENSG00000185115	NDNL2	necdin-like 2 [Source:HGNC Symbol;Acc:HGNC:7677]	1.56368	2.94989e-07		ENSMUSG00000100937	1700020D05Rik	RIKEN cDNA 1700020D05 gene [Source:MGI Symbol;Acc:MGI:1922805]	1.31769	0.49634	1.27382	0.368235	1.14826	0.806494
ENSG00000107863	ARHGAP21	Rho GTPase activating protein 21 [Source:HGNC Symbol;Acc:HGNC:23725]	1.56352	0.000118515		ENSMUSG00000036591	Arhgap21	Rho GTPase activating protein 21 [Source:MGI Symbol;Acc:MGI:1918685]	1.32958	2.24049e-06	1.38109	1.51544e-11	1.24758	1.45354e-05
ENSG00000221823	PPP3R1	protein phosphatase 3, regulatory subunit B, alpha [Source:HGNC Symbol;Acc:HGNC:9317]	1.56328	6.82796e-08		ENSMUSG00000033953	Ppp3r1	protein phosphatase 3, regulatory subunit B, alpha isoform (calcineurin B, type I) [Source:MGI Symbol;Acc:MGI:107172]	1.08093	0.322406	1.25674	7.57034e-05	1.09647	0.052978
ENSG00000106086	PLEKHA8	pleckstrin homology domain containing, family A (phosphoinositide binding specific) member 8 [Source:HGNC Symbol;Acc:HGNC:30037]	1.5629	1.06047e-07		ENSMUSG00000005225	Plekha8	pleckstrin homology domain containing, family A (phosphoinositide binding specific) member 8 [Source:MGI Symbol;Acc:MGI:2681164]	0.515651	4.27489e-13	0.517756	1.04967e-23	0.80064	0.00251825
ENSG00000144583	2004-03-01	membrane-associated ring finger (C3HC4) 4, E3 ubiquitin protein ligase [Source:HGNC Symbol;Acc:HGNC:29269]	1.56288	8.87308e-06		ENSMUSG00000039372	2004-03-01	membrane-associated ring finger (C3HC4) 4 [Source:MGI Symbol;Acc:MGI:2683550]	1.57563	8.82143e-14	1.46729	1.81445e-08	2.85825	1.91016e-12
ENSG00000183337	BCOR	BCL6 corepressor [Source:HGNC Symbol;Acc:HGNC:20893]	1.56285	0.00138431		ENSMUSG00000040363	Bcor	BCL6 interacting corepressor [Source:MGI Symbol;Acc:MGI:1918708]	3.78922	5.21932e-26	3.13086	7.59779e-112	2.26302	1.00152e-43
ENSG00000134324	LPIN1	lipin 1 [Source:HGNC Symbol;Acc:HGNC:13345]	1.5628	4.89748e-05		ENSMUSG00000020593	Lpin1	lipin 1 [Source:MGI Symbol;Acc:MGI:1891340]	1.71175	3.67241e-09	1.88388	1.35808e-27	2.54681	7.79964e-57
ENSG00000127947	PTPN12	protein tyrosine phosphatase, non-receptor type 12 [Source:HGNC Symbol;Acc:HGNC:9645]	1.56233	4.36441e-07		ENSMUSG00000028771	Ptpn12	protein tyrosine phosphatase, non-receptor type 12 [Source:MGI Symbol;Acc:MGI:104673]	1.5552	2.07675e-05	1.35819	2.39381e-07	1.54603	1.98564e-17
ENSG00000153012	LGI2	leucine-rich repeat LGI family, member 2 [Source:HGNC Symbol;Acc:HGNC:18710]	1.56213	0.0357042		ENSMUSG00000039252	Lgi2	leucine-rich repeat LGI family, member 2 [Source:MGI Symbol;Acc:MGI:2180196]	0.873658	0.262815	1.17648	0.0505106	1.06831	0.350114
ENSG00000144597	EAF1	ELL associated factor 1 [Source:HGNC Symbol;Acc:HGNC:20907]	1.56181	2.88684e-06		ENSMUSG00000021890	Eaf1	ELL associated factor 1 [Source:MGI Symbol;Acc:MGI:1921677]	0.853507	0.155704	1.03881	0.74657	1.31161	5.23343e-05
ENSG00000184182	UBE2F	ubiquitin-conjugating enzyme E2F (putative) [Source:HGNC Symbol;Acc:HGNC:12480]	1.56115	1.38394e-07		ENSMUSG00000034343	Ube2f	ubiquitin-conjugating enzyme E2F (putative) [Source:MGI Symbol;Acc:MGI:1915171]	1.00652	0.967922	0.888585	0.170532	1.23966	0.00083283
ENSG00000106459	NRF1	nuclear respiratory factor 1 [Source:HGNC Symbol;Acc:HGNC:7996]	1.56113	0.027443		ENSMUSG00000058440	Nrf1	nuclear respiratory factor 1 [Source:MGI Symbol;Acc:MGI:1332235]	1.46245	0.013391	1.40623	4.46776e-08	1.32502	1.61078e-05
ENSG00000061676	NCKAP1	NCK-associated protein 1 [Source:HGNC Symbol;Acc:HGNC:7666]	1.56082	1.10685e-16		ENSMUSG00000027002	Nckap1	NCK-associated protein 1 [Source:MGI Symbol;Acc:MGI:1355333]	1.11355	0.327005	1.2815	2.0908e-06	1.20368	8.77357e-06
ENSG00000123095	BHLHE41	basic helix-loop-helix family, member e41 [Source:HGNC Symbol;Acc:HGNC:16617]	1.56034	0.000285417		ENSMUSG00000030256	Bhlhe41	basic helix-loop-helix family, member e41 [Source:MGI Symbol;Acc:MGI:1930704]	0.859155	0.551909	1.35884	0.0663954	0.773451	0.0154818
ENSG00000186591	UBE2H	ubiquitin-conjugating enzyme E2H [Source:HGNC Symbol;Acc:HGNC:12484]	1.56018	0.000725213		ENSMUSG00000039159	Ube2h	ubiquitin-conjugating enzyme E2H [Source:MGI Symbol;Acc:MGI:104632]	2.51325	3.58315e-57	2.00714	5.17927e-25	1.47294	3.0286e-16
ENSG00000142634	EFHD2	EF-hand domain family, member D2 [Source:HGNC Symbol;Acc:HGNC:28670]	1.56001	9.78307e-06		ENSMUSG00000040659	Efhd2	EF hand domain containing 2 [Source:MGI Symbol;Acc:MGI:106504]	1.18401	0.166315	0.907589	0.208406	1.42762	1.37063e-09
ENSG00000118046	STK11	serine/threonine kinase 11 [Source:HGNC Symbol;Acc:HGNC:11389]	1.55981	0.000599647		ENSMUSG00000003068	Stk11	serine/threonine kinase 11 [Source:MGI Symbol;Acc:MGI:1341870]	1.62965	1.09192e-07	1.44432	9.7062e-11	1.49759	4.24396e-15
ENSG00000057252	SOAT1	sterol O-acyltransferase 1 [Source:HGNC Symbol;Acc:HGNC:11177]	1.55964	1.95029e-07		ENSMUSG00000026600	Soat1	sterol O-acyltransferase 1 [Source:MGI Symbol;Acc:MGI:104665]	2.17714	1.84843e-07	1.45451	4.15128e-11	1.53925	1.54113e-18
ENSG00000040199	PHLPP2	PH domain and leucine rich repeat protein phosphatase 2 [Source:HGNC Symbol;Acc:HGNC:29149]	1.55935	1.3714e-06		ENSMUSG00000031732	Phlpp2	PH domain and leucine rich repeat protein phosphatase 2 [Source:MGI Symbol;Acc:MGI:2444928]	0.571616	1.24268e-12	0.760834	0.000138029	0.900667	0.119359
ENSG00000168461	RAB31	RAB31, member RAS oncogene family [Source:HGNC Symbol;Acc:HGNC:9771]	1.55922	3.38042e-06		ENSMUSG00000056515	Rab31	RAB31, member RAS oncogene family [Source:MGI Symbol;Acc:MGI:1914603]	1.4442	3.9082e-09	1.09081	0.135873	1.36782	4.97164e-11
ENSG00000068697	LAPTM4A	lysosomal protein transmembrane 4 alpha [Source:HGNC Symbol;Acc:HGNC:6924]	1.55921	8.5644e-05		ENSMUSG00000020585	Laptm4a	lysosomal-associated protein transmembrane 4A [Source:MGI Symbol;Acc:MGI:108017]	1.31983	0.0121451	1.2027	0.00103761	1.20365	5.85481e-06
ENSG00000102221	JADE3	jade family PHD finger 3 [Source:HGNC Symbol;Acc:HGNC:22982]	1.55894	0.000101747		ENSMUSG00000037315	Jade3	jade family PHD finger 3 [Source:MGI Symbol;Acc:MGI:2148019]	1.09346	0.549405	1.04954	0.676275	1.01538	0.910112
ENSG00000153208	MERTK	MER proto-oncogene, tyrosine kinase [Source:HGNC Symbol;Acc:HGNC:7027]	1.55889	0.000243565		ENSMUSG00000014361	Mertk	c-mer proto-oncogene tyrosine kinase [Source:MGI Symbol;Acc:MGI:96965]	1.26139	0.320015	1.14925	0.477177	1.2283	0.0444315
ENSG00000107854	TNKS2	tankyrase, TRF1-interacting ankyrin-related ADP-ribose polymerase 2 [Source:HGNC Symbol;Acc:HGNC:15677]	1.55844	1.76136e-05		ENSMUSG00000024811	Tnks2	tankyrase, TRF1-interacting ankyrin-related ADP-ribose polymerase 2 [Source:MGI Symbol;Acc:MGI:1921743]	1.22469	0.0142883	1.27647	1.57852e-05	1.29683	1.42273e-09
ENSG00000101558	VAPA	VAMP (vesicle-associated membrane protein)-associated protein A, 33kDa [Source:HGNC Symbol;Acc:HGNC:12648]	1.55811	2.03051e-07		ENSMUSG00000024091	Vapa	vesicle-associated membrane protein, associated protein A [Source:MGI Symbol;Acc:MGI:1353561]	1.15972	0.0798449	1.25437	0.000330717	1.30763	3.64685e-09
ENSG00000164182	NDUFAF2	NADH dehydrogenase (ubiquinone) complex I, assembly factor 2 [Source:HGNC Symbol;Acc:HGNC:28086]	1.5581	1.48067e-06		ENSMUSG00000068184	Ndufaf2	NADH dehydrogenase (ubiquinone) 1 alpha subcomplex, assembly factor 2 [Source:MGI Symbol;Acc:MGI:1922847]	1.26848	0.0691035	0.992663	0.947102	1.08309	0.604927
ENSG00000114446	IFT57	intraflagellar transport 57 [Source:HGNC Symbol;Acc:HGNC:17367]	1.55755	1.71506e-07		ENSMUSG00000032965	Ift57	intraflagellar transport 57 [Source:MGI Symbol;Acc:MGI:1921166]	1.12265	0.23064	0.970361	0.840742	0.879235	0.13751
ENSG00000100564	PIGH	phosphatidylinositol glycan anchor biosynthesis, class H [Source:HGNC Symbol;Acc:HGNC:8964]	1.55746	4.48114e-07		ENSMUSG00000021120	Pigh	phosphatidylinositol glycan anchor biosynthesis, class H [Source:MGI Symbol;Acc:MGI:99463]	0.51239	1.85554e-06	0.50267	2.74436e-08	0.563721	3.48812e-06
ENSG00000147883	CDKN2B	cyclin-dependent kinase inhibitor 2B (p15, inhibits CDK4) [Source:HGNC Symbol;Acc:HGNC:1788]	1.55711	0.062765		ENSMUSG00000073802	Cdkn2b	cyclin-dependent kinase inhibitor 2B (p15, inhibits CDK4) [Source:MGI Symbol;Acc:MGI:104737]	1.44617	0.393731	1.0395	0.923139	1.41587	0.000367201
ENSG00000108010	GLRX3	glutaredoxin 3 [Source:HGNC Symbol;Acc:HGNC:15987]	1.55711	2.625e-09		ENSMUSG00000031068	Glrx3	glutaredoxin 3 [Source:MGI Symbol;Acc:MGI:1353653]	1.17711	0.061686	1.05243	0.494334	1.12977	0.0176303
ENSG00000135046	ANXA1	annexin A1 [Source:HGNC Symbol;Acc:HGNC:533]	1.55683	0.0217931		ENSMUSG00000024659	Anxa1	annexin A1 [Source:MGI Symbol;Acc:MGI:96819]	1.44831	0.22171	1.2599	0.0325086	1.73918	6.8567e-19
ENSG00000109332	UBE2D3	ubiquitin-conjugating enzyme E2D 3 [Source:HGNC Symbol;Acc:HGNC:12476]	1.55644	5.25307e-07		ENSMUSG00000078578	Ube2d3	ubiquitin-conjugating enzyme E2D 3 [Source:MGI Symbol;Acc:MGI:1913355]	1.38403	3.21718e-07	1.45347	1.16637e-12	1.23095	4.1963e-06
ENSG00000085832	EPS15	epidermal growth factor receptor pathway substrate 15 [Source:HGNC Symbol;Acc:HGNC:3419]	1.55643	3.58292e-05		ENSMUSG00000028552	Eps15	epidermal growth factor receptor pathway substrate 15 [Source:MGI Symbol;Acc:MGI:104583]	1.71425	2.91937e-06	2.55612	5.47125e-10	1.41685	4.04374e-11
ENSG00000164542	KIAA0895	KIAA0895 [Source:HGNC Symbol;Acc:HGNC:22206]	1.55625	3.02414e-07		ENSMUSG00000036411	9530077C05Rik	RIKEN cDNA 9530077C05 gene [Source:MGI Symbol;Acc:MGI:1915533]	1.93963	1.24094e-11	1.29798	0.00852856	1.00505	0.960655
ENSG00000159884	CCDC107	coiled-coil domain containing 107 [Source:HGNC Symbol;Acc:HGNC:28465]	1.55621	8.0619e-05		ENSMUSG00000028461	Ccdc107	coiled-coil domain containing 107 [Source:MGI Symbol;Acc:MGI:1913423]	1.12544	0.395968	1.00838	0.963409	1.09638	0.424434
ENSG00000175104	TRAF6	TNF receptor-associated factor 6, E3 ubiquitin protein ligase [Source:HGNC Symbol;Acc:HGNC:12036]	1.55514	0.00228057		ENSMUSG00000027164	Traf6	TNF receptor-associated factor 6 [Source:MGI Symbol;Acc:MGI:108072]	1.12672	0.322981	0.963022	0.714244	1.17518	0.0365818
ENSG00000131148	EMC8	ER membrane protein complex subunit 8 [Source:HGNC Symbol;Acc:HGNC:7864]	1.55489	4.15445e-05		ENSMUSG00000031819	Emc8	ER membrane protein complex subunit 8 [Source:MGI Symbol;Acc:MGI:1343095]	0.878739	0.180054	0.796599	0.000182387	0.906991	0.130024
ENSG00000163605	PPP4R2	protein phosphatase 4, regulatory subunit 2 [Source:HGNC Symbol;Acc:HGNC:18296]	1.55479	2.6512e-09		ENSMUSG00000052144	Ppp4r2	protein phosphatase 4, regulatory subunit 2 [Source:MGI Symbol;Acc:MGI:3027896]	0.972532	0.835828	1.37678	6.66946e-08	1.47079	2.33375e-14
ENSG00000023902	PLEKHO1	pleckstrin homology domain containing, family O member 1 [Source:HGNC Symbol;Acc:HGNC:24310]	1.55444	3.62184e-13		ENSMUSG00000015745	Plekho1	pleckstrin homology domain containing, family O member 1 [Source:MGI Symbol;Acc:MGI:1914470]	1.19648	0.0871607	0.817976	0.00404077	1.20356	0.0233444
ENSG00000110400	PVRL1	poliovirus receptor-related 1 (herpesvirus entry mediator C) [Source:HGNC Symbol;Acc:HGNC:9706]	1.55416	3.59536e-05		ENSMUSG00000032012	Pvrl1	poliovirus receptor-related 1 [Source:MGI Symbol;Acc:MGI:1926483]	0.787787	0.00624899	1.3834	7.71886e-06	1.39125	8.11991e-08
ENSG00000141480	ARRB2	arrestin, beta 2 [Source:HGNC Symbol;Acc:HGNC:712]	1.55328	1.02276e-08		ENSMUSG00000060216	Arrb2	arrestin, beta 2 [Source:MGI Symbol;Acc:MGI:99474]	1.39705	5.60053e-09	1.24303	0.000470435	1.26259	2.89226e-05
ENSG00000169992	NLGN2	neuroligin 2 [Source:HGNC Symbol;Acc:HGNC:14290]	1.55298	2.24219e-06		ENSMUSG00000051790	Nlgn2	neuroligin 2 [Source:MGI Symbol;Acc:MGI:2681835]	1.16361	0.0435197	1.42134	2.85998e-11	1.28579	9.30308e-10
ENSG00000196976	LAGE3	L antigen family, member 3 [Source:HGNC Symbol;Acc:HGNC:26058]	1.5525	3.54088e-05		ENSMUSG00000015289	Lage3	L antigen family, member 3 [Source:MGI Symbol;Acc:MGI:1913442]	0.965084	0.867558	0.62261	1.00053e-06	0.69862	0.000588506
ENSG00000141378	PTRH2	peptidyl-tRNA hydrolase 2 [Source:HGNC Symbol;Acc:HGNC:24265]	1.55248	1.22537e-06		ENSMUSG00000072582	Ptrh2	peptidyl-tRNA hydrolase 2 [Source:MGI Symbol;Acc:MGI:2444848]	0.452874	6.0205e-07	0.486256	3.1018e-26	0.491271	3.69581e-18
ENSG00000132436	FIGNL1	fidgetin-like 1 [Source:HGNC Symbol;Acc:HGNC:13286]	1.55205	0.00161409		ENSMUSG00000035455	Fignl1	fidgetin-like 1 [Source:MGI Symbol;Acc:MGI:1890648]	0.480071	0.010931	0.37037	9.57195e-21	0.435022	3.65974e-08
ENSG00000139155	SLCO1C1	solute carrier organic anion transporter family, member 1C1 [Source:HGNC Symbol;Acc:HGNC:13819]	1.55204	2.0006e-05		ENSMUSG00000030235	Slco1c1	solute carrier organic anion transporter family, member 1c1 [Source:MGI Symbol;Acc:MGI:1889679]	1.53435	0.00604201	2.20395	3.97109e-24	1.22815	0.163945
ENSG00000122741	DCAF10	DDB1 and CUL4 associated factor 10 [Source:HGNC Symbol;Acc:HGNC:23686]	1.5519	3.14316e-10		ENSMUSG00000035572	Dcaf10	DDB1 and CUL4 associated factor 10 [Source:MGI Symbol;Acc:MGI:2140179]	1.07893	0.520657	1.12351	0.114484	1.27439	2.85818e-05
ENSG00000112514	CUTA	cutA divalent cation tolerance homolog (E. coli) [Source:HGNC Symbol;Acc:HGNC:21101]	1.55186	4.6197e-06		ENSMUSG00000024194	Cuta	cutA divalent cation tolerance homolog (E. coli) [Source:MGI Symbol;Acc:MGI:1914925]	1.30765	0.0293917	1.06469	0.551347	1.25949	0.0011892
ENSG00000101745	ANKRD12	ankyrin repeat domain 12 [Source:HGNC Symbol;Acc:HGNC:29135]	1.55163	0.000136939		ENSMUSG00000034647	Ankrd12	ankyrin repeat domain 12 [Source:MGI Symbol;Acc:MGI:1914357]	0.653274	7.25797e-06	1.17106	0.00429444	1.18434	0.00323575
ENSG00000149925	ALDOA	aldolase A, fructose-bisphosphate [Source:HGNC Symbol;Acc:HGNC:414]	1.55076	2.77039e-08		ENSMUSG00000030695	Aldoa	aldolase A, fructose-bisphosphate [Source:MGI Symbol;Acc:MGI:87994]	1.19805	0.12004	1.49375	1.06381e-17	1.40487	3.90626e-19
ENSG00000171208	NETO2	neuropilin (NRP) and tolloid (TLL)-like 2 [Source:HGNC Symbol;Acc:HGNC:14644]	1.55056	3.5759e-10		ENSMUSG00000036902	Neto2	neuropilin (NRP) and tolloid (TLL)-like 2 [Source:MGI Symbol;Acc:MGI:1921763]	1.08638	0.710134	0.991552	0.945966	1.18157	0.0174973
ENSG00000072401	UBE2D1	ubiquitin-conjugating enzyme E2D 1 [Source:HGNC Symbol;Acc:HGNC:12474]	1.55042	4.81222e-05		ENSMUSG00000019927	Ube2d1	ubiquitin-conjugating enzyme E2D 1 [Source:MGI Symbol;Acc:MGI:2384911]	0.633736	7.61033e-07	0.53104	8.91264e-29	0.894075	0.0720011
ENSG00000129083	COPB1	coatomer protein complex, subunit beta 1 [Source:HGNC Symbol;Acc:HGNC:2231]	1.55025	2.56708e-08		ENSMUSG00000030754	Copb1	coatomer protein complex, subunit beta 1 [Source:MGI Symbol;Acc:MGI:1917599]	1.0956	0.211353	1.13915	0.0350315	1.21722	1.75073e-05
ENSG00000076826	CAMSAP3	calmodulin regulated spectrin-associated protein family, member 3 [Source:HGNC Symbol;Acc:HGNC:29307]	1.54996	1.0257e-08		ENSMUSG00000044433	Camsap3	calmodulin regulated spectrin-associated protein family, member 3 [Source:MGI Symbol;Acc:MGI:1916947]	0.784203	0.000569979	0.554482	1.31226e-23	0.802003	0.00012395
ENSG00000008256	CYTH3	cytohesin 3 [Source:HGNC Symbol;Acc:HGNC:9504]	1.54994	7.34066e-10		ENSMUSG00000018001	Cyth3	cytohesin 3 [Source:MGI Symbol;Acc:MGI:1335107]	0.656301	4.46527e-11	0.578169	2.00412e-20	1.42201	2.10641e-11
ENSG00000077147	TM9SF3	transmembrane 9 superfamily member 3 [Source:HGNC Symbol;Acc:HGNC:21529]	1.54969	1.92247e-06		ENSMUSG00000025016	Tm9sf3	transmembrane 9 superfamily member 3 [Source:MGI Symbol;Acc:MGI:1914262]	1.2349	0.00375196	1.24909	5.03477e-06	1.25278	7.31352e-08
ENSG00000115904	SOS1	son of sevenless homolog 1 (Drosophila) [Source:HGNC Symbol;Acc:HGNC:11187]	1.54963	3.02713e-06		ENSMUSG00000024241	Sos1	son of sevenless homolog 1 (Drosophila) [Source:MGI Symbol;Acc:MGI:98354]	1.3386	3.85961e-05	1.61014	2.4746e-13	1.10088	0.113412
ENSG00000182287	AP1S2	adaptor-related protein complex 1, sigma 2 subunit [Source:HGNC Symbol;Acc:HGNC:560]	1.54922	6.88285e-07		ENSMUSG00000031367	Ap1s2	adaptor-related protein complex 1, sigma 2 subunit [Source:MGI Symbol;Acc:MGI:1889383]	1.17509	0.253019	1.33732	2.27125e-05	1.09439	0.121455
ENSG00000128266	GNAZ	guanine nucleotide binding protein (G protein), alpha z polypeptide [Source:HGNC Symbol;Acc:HGNC:4395]	1.54921	8.77698e-07		ENSMUSG00000040009	Gnaz	guanine nucleotide binding protein, alpha z subunit [Source:MGI Symbol;Acc:MGI:95780]	0.846678	0.0944329	0.969051	0.716338	0.955317	0.479536
ENSG00000147799	ARHGAP39	Rho GTPase activating protein 39 [Source:HGNC Symbol;Acc:HGNC:29351]	1.54843	0.000293986		ENSMUSG00000033697	Arhgap39	Rho GTPase activating protein 39 [Source:MGI Symbol;Acc:MGI:107858]	0.863299	0.0938124	0.791481	4.38531e-05	1.20953	0.00168975
ENSG00000105855	ITGB8	integrin, beta 8 [Source:HGNC Symbol;Acc:HGNC:6163]	1.54829	8.61524e-05		ENSMUSG00000025321	Itgb8	integrin beta 8 [Source:MGI Symbol;Acc:MGI:1338035]	2.09638	0.000135707	1.95018	1.14159e-35	1.89914	2.27191e-25
ENSG00000196924	FLNA	filamin A, alpha [Source:HGNC Symbol;Acc:HGNC:3754]	1.54816	4.67748e-05		ENSMUSG00000031328	Flna	filamin, alpha [Source:MGI Symbol;Acc:MGI:95556]	0.891715	0.627346	0.958067	0.695965	1.13422	0.00203531
ENSG00000066933	MYO9A	myosin IXA [Source:HGNC Symbol;Acc:HGNC:7608]	1.54806	0.000479291		ENSMUSG00000039585	Myo9a	myosin IXa [Source:MGI Symbol;Acc:MGI:107735]	1.16415	0.269142	1.01632	0.836281	1.03743	0.565084
ENSG00000149269	PAK1	p21 protein (Cdc42/Rac)-activated kinase 1 [Source:HGNC Symbol;Acc:HGNC:8590]	1.54795	9.06622e-10		ENSMUSG00000030774	Pak1	p21 protein (Cdc42/Rac)-activated kinase 1 [Source:MGI Symbol;Acc:MGI:1339975]	1.39638	5.89557e-05	1.23467	0.000584667	1.60518	8.32361e-25
ENSG00000220205	VAMP2	vesicle-associated membrane protein 2 (synaptobrevin 2) [Source:HGNC Symbol;Acc:HGNC:12643]	1.54714	1.4185e-06		ENSMUSG00000020894	Vamp2	vesicle-associated membrane protein 2 [Source:MGI Symbol;Acc:MGI:1313277]	1.16179	0.0258835	1.66438	6.22935e-18	1.36976	6.21886e-13
ENSG00000123992	DNPEP	aspartyl aminopeptidase [Source:HGNC Symbol;Acc:HGNC:2981]	1.5469	1.18576e-08		ENSMUSG00000026209	Dnpep	aspartyl aminopeptidase [Source:MGI Symbol;Acc:MGI:1278328]	1.08627	0.601257	0.93556	0.365424	1.06375	0.370697
ENSG00000162545	CAMK2N1	calcium/calmodulin-dependent protein kinase II inhibitor 1 [Source:HGNC Symbol;Acc:HGNC:24190]	1.5462	2.20597e-08		ENSMUSG00000046447	Camk2n1	calcium/calmodulin-dependent protein kinase II inhibitor 1 [Source:MGI Symbol;Acc:MGI:1913509]	1.14706	0.242287	1.41787	1.32553e-08	1.60394	2.29475e-19
ENSG00000163444	TMEM183A	transmembrane protein 183A [Source:HGNC Symbol;Acc:HGNC:20173]	1.54521	2.3382e-08		ENSMUSG00000042305	Tmem183a	transmembrane protein 183A [Source:MGI Symbol;Acc:MGI:1914729]	1.6309	6.93114e-09	1.51185	5.90978e-16	1.47522	4.61548e-16
ENSG00000171150	SOCS5	suppressor of cytokine signaling 5 [Source:HGNC Symbol;Acc:HGNC:16852]	1.54499	2.6101e-05		ENSMUSG00000037104	Socs5	suppressor of cytokine signaling 5 [Source:MGI Symbol;Acc:MGI:2385459]	0.569989	3.73614e-17	0.694208	5.9017e-08	1.15043	0.0233444
ENSG00000005339	CREBBP	CREB binding protein [Source:HGNC Symbol;Acc:HGNC:2348]	1.54497	0.00154746		ENSMUSG00000022521	Crebbp	CREB binding protein [Source:MGI Symbol;Acc:MGI:1098280]	1.80905	5.87066e-10	1.55773	7.51783e-20	1.42823	3.10012e-10
ENSG00000166012	TAF1D	TATA box binding protein (TBP)-associated factor, RNA polymerase I, D, 41kDa [Source:HGNC Symbol;Acc:HGNC:28759]	1.54486	1.60353e-05		ENSMUSG00000031939	Taf1d	TATA box binding protein (Tbp)-associated factor, RNA polymerase I, D [Source:MGI Symbol;Acc:MGI:1922566]	2.53215	2.38963e-31	2.0373	1.19349e-33	1.73273	2.75796e-15
ENSG00000128891	C15orf57	chromosome 15 open reading frame 57 [Source:HGNC Symbol;Acc:HGNC:28295]	1.54467	8.36992e-05		ENSMUSG00000039983	Ccdc32	coiled-coil domain containing 32 [Source:MGI Symbol;Acc:MGI:2685477]	0.7698	0.00341925	0.659655	3.80171e-08	0.815543	0.0340777
ENSG00000165312	OTUD1	OTU deubiquitinase 1 [Source:HGNC Symbol;Acc:HGNC:27346]	1.54465	0.00136655		ENSMUSG00000043415	Otud1	OTU domain containing 1 [Source:MGI Symbol;Acc:MGI:1918448]	2.55177	2.52471e-18	2.38231	1.0009e-27	2.02647	3.56685e-08
ENSG00000174437	ATP2A2	ATPase, Ca++ transporting, cardiac muscle, slow twitch 2 [Source:HGNC Symbol;Acc:HGNC:812]	1.54459	3.75173e-08		ENSMUSG00000029467	Atp2a2	ATPase, Ca++ transporting, cardiac muscle, slow twitch 2 [Source:MGI Symbol;Acc:MGI:88110]	1.28365	0.0450705	1.44067	8.00938e-11	1.21211	3.94948e-06
ENSG00000143337	TOR1AIP1	torsin A interacting protein 1 [Source:HGNC Symbol;Acc:HGNC:29456]	1.54422	0.000604169		ENSMUSG00000026466	Tor1aip1	torsin A interacting protein 1 [Source:MGI Symbol;Acc:MGI:3582693]	5.54132	1.32089e-34	2.91503	7.11896e-46	1.58966	1.6258e-16
ENSG00000152784	PRDM8	PR domain containing 8 [Source:HGNC Symbol;Acc:HGNC:13993]	1.5442	0.00626716		ENSMUSG00000035456	Prdm8	PR domain containing 8 [Source:MGI Symbol;Acc:MGI:1924880]	2.39718	5.78143e-11	3.87995	2.54553e-74	0.901317	0.70999
ENSG00000101236	RNF24	ring finger protein 24 [Source:HGNC Symbol;Acc:HGNC:13779]	1.54415	0.000142749		ENSMUSG00000048911	Rnf24	ring finger protein 24 [Source:MGI Symbol;Acc:MGI:1261771]	1.038	0.829587	0.852559	0.0193314	1.61021	4.90979e-21
ENSG00000010017	RANBP9	RAN binding protein 9 [Source:HGNC Symbol;Acc:HGNC:13727]	1.54349	5.43129e-07		ENSMUSG00000038546	Ranbp9	RAN binding protein 9 [Source:MGI Symbol;Acc:MGI:1928741]	1.45824	3.30984e-07	1.25221	8.36935e-05	1.09812	0.130005
ENSG00000104164	BLOC1S6	biogenesis of lysosomal organelles complex-1, subunit 6, pallidin [Source:HGNC Symbol;Acc:HGNC:8549]	1.54299	1.33245e-06		ENSMUSG00000005804	Bloc1s6	biogenesis of lysosomal organelles complex-1, subunit 6, pallidin [Source:MGI Symbol;Acc:MGI:1927580]	0.84977	0.0832815	0.821587	0.00118491	0.783309	8.88813e-06
ENSG00000163781	TOPBP1	topoisomerase (DNA) II binding protein 1 [Source:HGNC Symbol;Acc:HGNC:17008]	1.54294	5.15901e-05		ENSMUSG00000032555	Topbp1	topoisomerase (DNA) II binding protein 1 [Source:MGI Symbol;Acc:MGI:1920018]	0.807902	0.207921	0.926318	0.258996	0.89345	0.0727112
ENSG00000125107	CNOT1	CCR4-NOT transcription complex, subunit 1 [Source:HGNC Symbol;Acc:HGNC:7877]	1.54284	0.000615446		ENSMUSG00000036550	Cnot1	CCR4-NOT transcription complex, subunit 1 [Source:MGI Symbol;Acc:MGI:2442402]	0.898994	0.26576	1.09093	0.140001	1.11283	0.0378789
ENSG00000131435	PDLIM4	PDZ and LIM domain 4 [Source:HGNC Symbol;Acc:HGNC:16501]	1.5426	0.00507359		ENSMUSG00000020388	Pdlim4	PDZ and LIM domain 4 [Source:MGI Symbol;Acc:MGI:1353470]	1.34466	0.00147711	0.893933	0.335794	1.05022	0.716684
ENSG00000169047	IRS1	insulin receptor substrate 1 [Source:HGNC Symbol;Acc:HGNC:6125]	1.54248	3.59536e-05		ENSMUSG00000055980	Irs1	insulin receptor substrate 1 [Source:MGI Symbol;Acc:MGI:99454]	1.13223	0.283748	1.48147	2.22079e-11	1.05572	0.483708
ENSG00000174460	ZCCHC12	zinc finger, CCHC domain containing 12 [Source:HGNC Symbol;Acc:HGNC:27273]	1.54229	3.73208e-08		ENSMUSG00000036699	Zcchc12	zinc finger, CCHC domain containing 12 [Source:MGI Symbol;Acc:MGI:1919943]	1.28127	0.000419126	1.31765	3.52288e-07	1.2236	1.32659e-05
ENSG00000165113	GKAP1	G kinase anchoring protein 1 [Source:HGNC Symbol;Acc:HGNC:17496]	1.54207	9.16245e-07		ENSMUSG00000021552	Gkap1	G kinase anchoring protein 1 [Source:MGI Symbol;Acc:MGI:1891694]	1.30878	0.0462516	1.07711	0.473967	1.09945	0.266267
ENSG00000147234	FRMPD3	FERM and PDZ domain containing 3 [Source:HGNC Symbol;Acc:HGNC:29382]	1.54185	8.8901e-05		ENSMUSG00000042425	Frmpd3	FERM and PDZ domain containing 3 [Source:MGI Symbol;Acc:MGI:3646547]	0.927607	0.749497	0.98712	0.961798	0.839789	0.37016
ENSG00000073008	PVR	poliovirus receptor [Source:HGNC Symbol;Acc:HGNC:9705]	1.54185	2.96652e-10		ENSMUSG00000040511	Pvr	poliovirus receptor [Source:MGI Symbol;Acc:MGI:107741]	4.81461	7.51149e-86	3.50363	5.62869e-48	1.9298	9.03748e-17
ENSG00000214595	EML6	echinoderm microtubule associated protein like 6 [Source:HGNC Symbol;Acc:HGNC:35412]	1.54157	0.00193424		ENSMUSG00000044072	Eml6	echinoderm microtubule associated protein like 6 [Source:MGI Symbol;Acc:MGI:2442895]	0.898497	0.428212	0.848084	0.0371047	0.759684	0.000668948
ENSG00000052749	RRP12	ribosomal RNA processing 12 homolog [Source:HGNC Symbol;Acc:HGNC:29100]	1.54141	0.00219361		ENSMUSG00000035049	Rrp12	ribosomal RNA processing 12 homolog (S. cerevisiae) [Source:MGI Symbol;Acc:MGI:2147437]	0.619874	9.03159e-10	0.56191	2.13166e-16	0.73138	0.000149865
ENSG00000196449	YRDC	yrdC N(6)-threonylcarbamoyltransferase domain containing [Source:HGNC Symbol;Acc:HGNC:28905]	1.54058	3.05988e-05		ENSMUSG00000028889	Yrdc	yrdC domain containing (E.coli) [Source:MGI Symbol;Acc:MGI:2387201]	0.993586	0.973198	1.33429	0.00025555	1.18254	0.0577853
ENSG00000168615	ADAM9	ADAM metallopeptidase domain 9 [Source:HGNC Symbol;Acc:HGNC:216]	1.54053	0.00232912		ENSMUSG00000031555	Adam9	a disintegrin and metallopeptidase domain 9 (meltrin gamma) [Source:MGI Symbol;Acc:MGI:105376]	1.9277	8.55742e-12	1.9099	1.39601e-33	1.74568	3.32822e-25
ENSG00000166900	STX3	syntaxin 3 [Source:HGNC Symbol;Acc:HGNC:11438]	1.54022	0.00185743		ENSMUSG00000041488	Stx3	syntaxin 3 [Source:MGI Symbol;Acc:MGI:103077]	0.906987	0.469397	0.900762	0.350026	1.29706	0.000165225
ENSG00000140575	IQGAP1	IQ motif containing GTPase activating protein 1 [Source:HGNC Symbol;Acc:HGNC:6110]	1.54012	0.00023592		ENSMUSG00000030536	Iqgap1	IQ motif containing GTPase activating protein 1 [Source:MGI Symbol;Acc:MGI:1352757]	1.49086	0.00574327	1.1067	0.152021	1.4099	3.51958e-12
ENSG00000198929	NOS1AP	nitric oxide synthase 1 (neuronal) adaptor protein [Source:HGNC Symbol;Acc:HGNC:16859]	1.54004	0.023941		ENSMUSG00000038473	Nos1ap	nitric oxide synthase 1 (neuronal) adaptor protein [Source:MGI Symbol;Acc:MGI:1917979]	0.786438	0.0218604	1.30634	0.0114605	1.2893	0.0430574
ENSG00000130066	SAT1	spermidine/spermine N1-acetyltransferase 1 [Source:HGNC Symbol;Acc:HGNC:10540]	1.53894	2.64054e-07		ENSMUSG00000025283	Sat1	spermidine/spermine N1-acetyl transferase 1 [Source:MGI Symbol;Acc:MGI:98233]	2.94058	2.80625e-14	1.82037	1.85588e-13	2.08541	2.02536e-42
ENSG00000179889	PDXDC1	pyridoxal-dependent decarboxylase domain containing 1 [Source:HGNC Symbol;Acc:HGNC:28995]	1.53891	1.41265e-08		ENSMUSG00000022680	Pdxdc1	pyridoxal-dependent decarboxylase domain containing 1 [Source:MGI Symbol;Acc:MGI:1920909]	1.11935	0.414554	0.995167	0.968825	1.24972	2.35503e-06
ENSG00000168785	TSPAN5	tetraspanin 5 [Source:HGNC Symbol;Acc:HGNC:17753]	1.53887	0.00332986		ENSMUSG00000028152	Tspan5	tetraspanin 5 [Source:MGI Symbol;Acc:MGI:1928096]	1.00211	0.990346	0.960753	0.605927	1.33239	3.17036e-09
ENSG00000132718	SYT11	synaptotagmin XI [Source:HGNC Symbol;Acc:HGNC:19239]	1.53882	0.000403927		ENSMUSG00000068923	Syt11	synaptotagmin XI [Source:MGI Symbol;Acc:MGI:1859547]	0.927842	0.253839	0.993413	0.972954	0.970068	0.571387
ENSG00000068383	INPP5A	inositol polyphosphate-5-phosphatase, 40kDa [Source:HGNC Symbol;Acc:HGNC:6076]	1.53875	2.79429e-06		ENSMUSG00000025477	Inpp5a	inositol polyphosphate-5-phosphatase A [Source:MGI Symbol;Acc:MGI:2686961]	1.32225	1.81674e-05	1.41544	4.00567e-05	1.74134	2.52123e-24
ENSG00000188343	FAM92A1	family with sequence similarity 92, member A1 [Source:HGNC Symbol;Acc:HGNC:30452]	1.53792	8.73009e-10		ENSMUSG00000028218	Fam92a	family with sequence similarity 92, member A [Source:MGI Symbol;Acc:MGI:1915349]	1.07947	0.472753	0.907308	0.179873	0.974083	0.784899
ENSG00000188766	SPRED3	sprouty-related, EVH1 domain containing 3 [Source:HGNC Symbol;Acc:HGNC:31041]	1.53787	0.00014202		ENSMUSG00000037239	Spred3	sprouty-related, EVH1 domain containing 3 [Source:MGI Symbol;Acc:MGI:2142186]	0.775678	0.00218041	1.29731	2.41237e-05	0.987508	0.882346
ENSG00000169714	CNBP	CCHC-type zinc finger, nucleic acid binding protein [Source:HGNC Symbol;Acc:HGNC:13164]	1.53787	4.71776e-08		ENSMUSG00000030057	Cnbp	cellular nucleic acid binding protein [Source:MGI Symbol;Acc:MGI:88431]	1.59021	8.82908e-12	1.78153	9.29933e-27	1.53235	3.2892e-21
ENSG00000148082	SHC3	SHC (Src homology 2 domain containing) transforming protein 3 [Source:HGNC Symbol;Acc:HGNC:18181]	1.53766	1.04036e-08		ENSMUSG00000021448	Shc3	src homology 2 domain-containing transforming protein C3 [Source:MGI Symbol;Acc:MGI:106179]	0.922605	0.509683	1.37463	7.39947e-09	1.32769	0.00130517
ENSG00000187051	RPS19BP1	ribosomal protein S19 binding protein 1 [Source:HGNC Symbol;Acc:HGNC:28749]	1.53707	0.000197305		ENSMUSG00000051518	Rps19bp1	ribosomal protein S19 binding protein 1 [Source:MGI Symbol;Acc:MGI:1913788]	0.954487	0.750883	0.777548	0.00444811	1.13526	0.180257
ENSG00000133687	TMTC1	transmembrane and tetratricopeptide repeat containing 1 [Source:HGNC Symbol;Acc:HGNC:24099]	1.53692	1.14018e-05		ENSMUSG00000030306	Tmtc1	transmembrane and tetratricopeptide repeat containing 1 [Source:MGI Symbol;Acc:MGI:3039590]	0.615512	7.59916e-05	0.548681	3.76282e-19	0.93504	0.3644
ENSG00000100422	CERK	ceramide kinase [Source:HGNC Symbol;Acc:HGNC:19256]	1.53691	9.18504e-10		ENSMUSG00000035891	Cerk	ceramide kinase [Source:MGI Symbol;Acc:MGI:2386052]	1.27736	0.00141421	1.09888	0.177425	1.04992	0.479275
ENSG00000090565	RAB11FIP3	RAB11 family interacting protein 3 (class II) [Source:HGNC Symbol;Acc:HGNC:17224]	1.53665	1.76759e-07		ENSMUSG00000037098	Rab11fip3	RAB11 family interacting protein 3 (class II) [Source:MGI Symbol;Acc:MGI:2444431]	0.746199	0.000103271	0.974775	0.770076	1.22961	0.000281082
ENSG00000155897	ADCY8	adenylate cyclase 8 (brain) [Source:HGNC Symbol;Acc:HGNC:239]	1.5366	0.000491111		ENSMUSG00000022376	Adcy8	adenylate cyclase 8 [Source:MGI Symbol;Acc:MGI:1341110]	1.13946	0.0796806	1.69639	1.01169e-08	1.05877	0.393212
ENSG00000126524	SBDS	Shwachman-Bodian-Diamond syndrome [Source:HGNC Symbol;Acc:HGNC:19440]	1.53646	3.87171e-05		ENSMUSG00000025337	Sbds	Shwachman-Bodian-Diamond syndrome homolog (human) [Source:MGI Symbol;Acc:MGI:1913961]	4.18268	2.43537e-67	1.73139	5.81608e-18	1.73523	1.548e-22
ENSG00000107643	MAPK8	mitogen-activated protein kinase 8 [Source:HGNC Symbol;Acc:HGNC:6881]	1.53616	1.26421e-05		ENSMUSG00000021936	Mapk8	mitogen-activated protein kinase 8 [Source:MGI Symbol;Acc:MGI:1346861]	1.23749	0.00462014	1.09499	0.188939	1.23381	5.95051e-05
ENSG00000116667	C1orf21	chromosome 1 open reading frame 21 [Source:HGNC Symbol;Acc:HGNC:15494]	1.53609	1.03847e-05		ENSMUSG00000032666	1700025G04Rik	RIKEN cDNA 1700025G04 gene [Source:MGI Symbol;Acc:MGI:1916649]	1.10654	0.424731	1.34696	6.52903e-07	1.04738	0.534427
ENSG00000128683	GAD1	glutamate decarboxylase 1 (brain, 67kDa) [Source:HGNC Symbol;Acc:HGNC:4092]	1.53584	1.17466e-05		ENSMUSG00000070880	Gad1	glutamate decarboxylase 1 [Source:MGI Symbol;Acc:MGI:95632]	1.11399	0.225493	2.68177	1.01779e-12	1.94291	8.30077e-30
ENSG00000177125	ZBTB34	zinc finger and BTB domain containing 34 [Source:HGNC Symbol;Acc:HGNC:31446]	1.53549	0.000139073		ENSMUSG00000068966	Zbtb34	zinc finger and BTB domain containing 34 [Source:MGI Symbol;Acc:MGI:2685195]	0.413072	3.70279e-28	0.732056	0.000404625	1.23905	0.00161426
ENSG00000177119	ANO6	anoctamin 6 [Source:HGNC Symbol;Acc:HGNC:25240]	1.53537	0.000361858		ENSMUSG00000064210	Ano6	anoctamin 6 [Source:MGI Symbol;Acc:MGI:2145890]	1.72228	1.08355e-07	1.44577	2.43807e-09	1.63596	2.60444e-20
ENSG00000143164	DCAF6	DDB1 and CUL4 associated factor 6 [Source:HGNC Symbol;Acc:HGNC:30002]	1.53524	2.08817e-09		ENSMUSG00000026571	Dcaf6	DDB1 and CUL4 associated factor 6 [Source:MGI Symbol;Acc:MGI:1921356]	1.38912	9.47144e-09	1.34297	1.19399e-07	1.55239	1.07555e-17
ENSG00000070540	WIPI1	WD repeat domain, phosphoinositide interacting 1 [Source:HGNC Symbol;Acc:HGNC:25471]	1.5352	0.000282631		ENSMUSG00000041895	Wipi1	WD repeat domain, phosphoinositide interacting 1 [Source:MGI Symbol;Acc:MGI:1261864]	1.31789	0.00135891	1.03016	0.811638	1.2304	0.00023281
ENSG00000124214	STAU1	staufen double-stranded RNA binding protein 1 [Source:HGNC Symbol;Acc:HGNC:11370]	1.53503	1.86425e-07		ENSMUSG00000039536	Stau1	staufen (RNA binding protein) homolog 1 (Drosophila) [Source:MGI Symbol;Acc:MGI:1338864]	1.39548	9.96278e-07	1.20417	0.00158548	1.17974	0.00152303
ENSG00000112787	FBRSL1	fibrosin-like 1 [Source:HGNC Symbol;Acc:HGNC:29308]	1.53502	3.8646e-05		ENSMUSG00000043323	Fbrsl1	fibrosin-like 1 [Source:MGI Symbol;Acc:MGI:1920907]	0.918729	0.603893	0.934317	0.499383	1.26535	8.70844e-05
ENSG00000138069	RAB1A	RAB1A, member RAS oncogene family [Source:HGNC Symbol;Acc:HGNC:9758]	1.53499	2.5443e-09		ENSMUSG00000020149	Rab1	RAB1, member RAS oncogene family [Source:MGI Symbol;Acc:MGI:97842]	1.35108	1.05819e-06	1.20777	0.000286824	1.38386	2.23734e-15
ENSG00000120688	WBP4	WW domain binding protein 4 [Source:HGNC Symbol;Acc:HGNC:12739]	1.53492	2.3724e-08		ENSMUSG00000022023	Wbp4	WW domain binding protein 4 [Source:MGI Symbol;Acc:MGI:109568]	0.741759	0.000138305	0.740067	8.65801e-07	0.946517	0.555426
ENSG00000143322	ABL2	ABL proto-oncogene 2, non-receptor tyrosine kinase [Source:HGNC Symbol;Acc:HGNC:77]	1.5347	0.0015446		ENSMUSG00000026596	Abl2	v-abl Abelson murine leukemia viral oncogene 2 (arg, Abelson-related gene) [Source:MGI Symbol;Acc:MGI:87860]	1.25469	0.0035584	1.04903	0.504392	1.41218	8.13365e-12
ENSG00000100285	NEFH	neurofilament, heavy polypeptide [Source:HGNC Symbol;Acc:HGNC:7737]	1.53418	0.000480369		ENSMUSG00000020396	Nefh	neurofilament, heavy polypeptide [Source:MGI Symbol;Acc:MGI:97309]	0.330391	3.31189e-23	0.31316	5.10655e-09	1.17475	0.0679778
ENSG00000164086	DUSP7	dual specificity phosphatase 7 [Source:HGNC Symbol;Acc:HGNC:3073]	1.53386	3.08031e-07		ENSMUSG00000053716	Dusp7	dual specificity phosphatase 7 [Source:MGI Symbol;Acc:MGI:2387100]	0.263791	2.22703e-25	0.549247	9.05247e-13	0.832722	0.0285105
ENSG00000055609	KMT2C	lysine (K)-specific methyltransferase 2C [Source:HGNC Symbol;Acc:HGNC:13726]	1.53354	0.00543892		ENSMUSG00000038056	Kmt2c	lysine (K)-specific methyltransferase 2C [Source:MGI Symbol;Acc:MGI:2444959]	1.48313	0.001137	1.41672	1.26903e-12	1.39268	4.18957e-08
ENSG00000134684	YARS	tyrosyl-tRNA synthetase [Source:HGNC Symbol;Acc:HGNC:12840]	1.53335	0.000877665		ENSMUSG00000028811	Yars	tyrosyl-tRNA synthetase [Source:MGI Symbol;Acc:MGI:2147627]	1.15441	0.0502446	1.53028	8.90018e-16	1.48335	1.16727e-18
ENSG00000075975	MKRN2	makorin ring finger protein 2 [Source:HGNC Symbol;Acc:HGNC:7113]	1.53297	8.77698e-07		ENSMUSG00000000439	Mkrn2	makorin, ring finger protein, 2 [Source:MGI Symbol;Acc:MGI:1914277]	1.22622	0.0483997	1.01619	0.871071	1.11791	0.133743
ENSG00000157500	APPL1	adaptor protein, phosphotyrosine interaction, PH domain and leucine zipper containing 1 [Source:HGNC Symbol;Acc:HGNC:24035]	1.53297	4.38102e-07		ENSMUSG00000040760	Appl1	adaptor protein, phosphotyrosine interaction, PH domain and leucine zipper containing 1 [Source:MGI Symbol;Acc:MGI:1920243]	1.05294	0.706788	0.977064	0.779245	1.57413	6.27322e-15
ENSG00000102543	CDADC1	cytidine and dCMP deaminase domain containing 1 [Source:HGNC Symbol;Acc:HGNC:20299]	1.53267	9.93395e-07		ENSMUSG00000021982	Cdadc1	cytidine and dCMP deaminase domain containing 1 [Source:MGI Symbol;Acc:MGI:1919141]	0.747069	0.00383265	0.827997	0.0824429	0.816784	0.0369091
ENSG00000154803	FLCN	folliculin [Source:HGNC Symbol;Acc:HGNC:27310]	1.53254	5.93769e-07		ENSMUSG00000032633	Flcn	folliculin [Source:MGI Symbol;Acc:MGI:2442184]	2.25596	3.2769e-07	2.6878	3.22389e-80	2.25102	4.83875e-62
ENSG00000135018	UBQLN1	ubiquilin 1 [Source:HGNC Symbol;Acc:HGNC:12508]	1.53246	1.54711e-09		ENSMUSG00000005312	Ubqln1	ubiquilin 1 [Source:MGI Symbol;Acc:MGI:1860276]	1.56698	6.78383e-14	1.56765	8.00196e-18	1.26201	2.32361e-07
ENSG00000119844	AFTPH	aftiphilin [Source:HGNC Symbol;Acc:HGNC:25951]	1.53222	4.87379e-05		ENSMUSG00000049659	Aftph	aftiphilin [Source:MGI Symbol;Acc:MGI:1923012]	1.19843	0.00761317	1.63509	3.34339e-18	1.24856	2.9511e-05
ENSG00000011638	TMEM159	transmembrane protein 159 [Source:HGNC Symbol;Acc:HGNC:30136]	1.53189	0.00224863		ENSMUSG00000030917	Tmem159	transmembrane protein 159 [Source:MGI Symbol;Acc:MGI:1925752]	1.12894	0.549021	0.872576	0.694484	1.44732	0.00512983
ENSG00000117477	CCDC181	coiled-coil domain containing 181 [Source:HGNC Symbol;Acc:HGNC:28051]	1.53177	0.000154549		ENSMUSG00000026578	Ccdc181	coiled-coil domain containing 181 [Source:MGI Symbol;Acc:MGI:1922145]	0.894226	0.571638	0.630635	3.78083e-08	0.573911	6.58712e-09
ENSG00000134851	TMEM165	transmembrane protein 165 [Source:HGNC Symbol;Acc:HGNC:30760]	1.53167	1.57042e-09		ENSMUSG00000029234	Tmem165	transmembrane protein 165 [Source:MGI Symbol;Acc:MGI:894407]	0.795715	0.0317301	0.941815	0.478126	1.10414	0.0898363
ENSG00000109819	PPARGC1A	peroxisome proliferator-activated receptor gamma, coactivator 1 alpha [Source:HGNC Symbol;Acc:HGNC:9237]	1.53161	8.90238e-08		ENSMUSG00000029167	Ppargc1a	peroxisome proliferative activated receptor, gamma, coactivator 1 alpha [Source:MGI Symbol;Acc:MGI:1342774]	1.09826	0.487183	1.80397	8.5884e-14	1.3991	7.16621e-05
ENSG00000213639	PPP1CB	protein phosphatase 1, catalytic subunit, beta isozyme [Source:HGNC Symbol;Acc:HGNC:9282]	1.53146	1.45329e-07		ENSMUSG00000014956	Ppp1cb	protein phosphatase 1, catalytic subunit, beta isoform [Source:MGI Symbol;Acc:MGI:104871]	1.44342	9.98074e-05	1.41067	8.18025e-12	1.50882	2.18394e-19
ENSG00000160408	ST6GALNAC6	ST6 (alpha-N-acetyl-neuraminyl-2,3-beta-galactosyl-1,3)-N-acetylgalactosaminide alpha-2,6-sialyltransferase 6 [Source:HGNC Symbol;Acc:HGNC:23364]	1.53144	1.29918e-06		ENSMUSG00000026811	St6galnac6	ST6 (alpha-N-acetyl-neuraminyl-2,3-beta-galactosyl-1,3)-N-acetylgalactosaminide alpha-2,6-sialyltransferase 6 [Source:MGI Symbol;Acc:MGI:1355316]	0.943209	0.722981	0.768121	4.00206e-05	1.00803	0.943761
ENSG00000110811	P3H3	prolyl 3-hydroxylase 3 [Source:HGNC Symbol;Acc:HGNC:19318]	1.53133	0.00116501		ENSMUSG00000023191	P3h3	prolyl 3-hydroxylase 3 [Source:MGI Symbol;Acc:MGI:1315208]	0.955257	0.781609	0.782687	0.00708951	0.904723	0.109854
ENSG00000103888	CEMIP	cell migration inducing protein, hyaluronan binding [Source:HGNC Symbol;Acc:HGNC:29213]	1.53078	0.0116543		ENSMUSG00000052353	Cemip	cell migration inducing protein, hyaluronan binding [Source:MGI Symbol;Acc:MGI:2443629]	0.83005	0.311685	0.662538	7.90296e-09	1.6543	0.0524771
ENSG00000116260	QSOX1	quiescin Q6 sulfhydryl oxidase 1 [Source:HGNC Symbol;Acc:HGNC:9756]	1.53071	4.13368e-07		ENSMUSG00000033684	Qsox1	quiescin Q6 sulfhydryl oxidase 1 [Source:MGI Symbol;Acc:MGI:1330818]	1.4215	4.71603e-05	0.994882	0.942504	1.27969	9.10095e-06
ENSG00000143013	LMO4	LIM domain only 4 [Source:HGNC Symbol;Acc:HGNC:6644]	1.52965	5.75325e-05		ENSMUSG00000028266	Lmo4	LIM domain only 4 [Source:MGI Symbol;Acc:MGI:109360]	1.26643	0.116632	1.01306	0.964229	1.21042	0.000234304
ENSG00000100650	SRSF5	serine/arginine-rich splicing factor 5 [Source:HGNC Symbol;Acc:HGNC:10787]	1.5294	1.71561e-05		ENSMUSG00000021134	Srsf5	serine/arginine-rich splicing factor 5 [Source:MGI Symbol;Acc:MGI:98287]	1.96844	1.87039e-25	2.43687	7.73327e-77	1.51434	5.9688e-23
ENSG00000112149	CD83	CD83 molecule [Source:HGNC Symbol;Acc:HGNC:1703]	1.52935	2.45528e-06		ENSMUSG00000015396	Cd83	CD83 antigen [Source:MGI Symbol;Acc:MGI:1328316]	0.878336	0.801155	1.04208	0.923866	0.563663	1.09339e-07
ENSG00000165782	TMEM55B	transmembrane protein 55B [Source:HGNC Symbol;Acc:HGNC:19299]	1.52927	7.58136e-08		ENSMUSG00000035953	Tmem55b	transmembrane protein 55b [Source:MGI Symbol;Acc:MGI:2448501]	1.00997	0.968147	1.1385	0.0492876	1.73413	2.65036e-27
ENSG00000130734	ATG4D	autophagy related 4D, cysteine peptidase [Source:HGNC Symbol;Acc:HGNC:20789]	1.52846	5.18334e-06		ENSMUSG00000002820	Atg4d	autophagy related 4D, cysteine peptidase [Source:MGI Symbol;Acc:MGI:2444308]	0.504582	1.45854e-13	0.641865	1.12932e-05	0.89668	0.292723
ENSG00000168724	DNAJC21	DnaJ (Hsp40) homolog, subfamily C, member 21 [Source:HGNC Symbol;Acc:HGNC:27030]	1.52842	3.03676e-08		ENSMUSG00000044224	Dnajc21	DnaJ (Hsp40) homolog, subfamily C, member 21 [Source:MGI Symbol;Acc:MGI:1925371]	0.986525	0.934806	0.969902	0.824148	1.24464	0.00639981
ENSG00000141425	RPRD1A	regulation of nuclear pre-mRNA domain containing 1A [Source:HGNC Symbol;Acc:HGNC:25560]	1.52807	3.62572e-11		ENSMUSG00000040446	Rprd1a	regulation of nuclear pre-mRNA domain containing 1A [Source:MGI Symbol;Acc:MGI:2385066]	1.34396	0.00666318	1.59235	1.28773e-13	1.37612	1.36119e-07
ENSG00000117020	AKT3	v-akt murine thymoma viral oncogene homolog 3 [Source:HGNC Symbol;Acc:HGNC:393]	1.52768	4.16528e-08		ENSMUSG00000019699	Akt3	thymoma viral proto-oncogene 3 [Source:MGI Symbol;Acc:MGI:1345147]	1.00369	1	1.074	0.315033	1.20027	8.03332e-05
ENSG00000167565	SERTAD3	SERTA domain containing 3 [Source:HGNC Symbol;Acc:HGNC:17931]	1.52765	0.000680494		ENSMUSG00000055200	Sertad3	SERTA domain containing 3 [Source:MGI Symbol;Acc:MGI:2180697]	4.08536	5.50863e-23	2.82759	6.45496e-16	2.02991	5.58155e-10
ENSG00000140859	KIFC3	kinesin family member C3 [Source:HGNC Symbol;Acc:HGNC:6326]	1.52742	3.73526e-09		ENSMUSG00000031788	Kifc3	kinesin family member C3 [Source:MGI Symbol;Acc:MGI:109202]	0.889229	0.296013	0.767588	3.23945e-05	0.884282	0.104287
ENSG00000115541	HSPE1	heat shock 10kDa protein 1 [Source:HGNC Symbol;Acc:HGNC:5269]	1.52727	5.51267e-05		ENSMUSG00000073676	Hspe1	heat shock protein 1 (chaperonin 10) [Source:MGI Symbol;Acc:MGI:104680]	1.23914	0.0349131	1.10065	0.266744	1.07705	0.288655
ENSG00000101327	PDYN	prodynorphin [Source:HGNC Symbol;Acc:HGNC:8820]	1.52657	0.0859208		ENSMUSG00000027400	Pdyn	prodynorphin [Source:MGI Symbol;Acc:MGI:97535]	1.08733	0.679037	1.21347	0.265356	0.893895	0.568733
ENSG00000019505	SYT13	synaptotagmin XIII [Source:HGNC Symbol;Acc:HGNC:14962]	1.52576	7.71434e-14		ENSMUSG00000027220	Syt13	synaptotagmin XIII [Source:MGI Symbol;Acc:MGI:1933945]	1.06332	0.620377	1.0639	0.632794	1.50559	6.4986e-14
ENSG00000105355	PLIN3	perilipin 3 [Source:HGNC Symbol;Acc:HGNC:16893]	1.52574	0.000218792		ENSMUSG00000024197	Plin3	perilipin 3 [Source:MGI Symbol;Acc:MGI:1914155]	0.934097	0.801562	0.630334	0.000319946	0.693876	1.79684e-07
ENSG00000079332	SAR1A	secretion associated, Ras related GTPase 1A [Source:HGNC Symbol;Acc:HGNC:10534]	1.52525	2.08527e-07		ENSMUSG00000020088	Sar1a	SAR1 gene homolog A (S. cerevisiae) [Source:MGI Symbol;Acc:MGI:98230]	1.69847	1.00817e-20	1.59927	5.01426e-17	1.5138	3.37787e-22
ENSG00000025796	SEC63	SEC63 homolog (S. cerevisiae) [Source:HGNC Symbol;Acc:HGNC:21082]	1.52512	6.55465e-08		ENSMUSG00000019802	Sec63	SEC63-like (S. cerevisiae) [Source:MGI Symbol;Acc:MGI:2155302]	1.40262	6.38467e-09	1.19072	0.00167341	1.20081	0.00033326
ENSG00000175606	TMEM70	transmembrane protein 70 [Source:HGNC Symbol;Acc:HGNC:26050]	1.52504	1.67626e-06		ENSMUSG00000025940	Tmem70	transmembrane protein 70 [Source:MGI Symbol;Acc:MGI:1915068]	0.748774	0.00124119	0.589813	1.91725e-11	0.630108	2.38689e-10
ENSG00000100532	CGRRF1	cell growth regulator with ring finger domain 1 [Source:HGNC Symbol;Acc:HGNC:15528]	1.52495	1.3251e-05		ENSMUSG00000055128	Cgrrf1	cell growth regulator with ring finger domain 1 [Source:MGI Symbol;Acc:MGI:1916368]	2.40985	1.08403e-08	1.75329	6.50403e-06	1.55172	2.53217e-05
ENSG00000109472	CPE	carboxypeptidase E [Source:HGNC Symbol;Acc:HGNC:2303]	1.52457	8.14473e-08		ENSMUSG00000037852	Cpe	carboxypeptidase E [Source:MGI Symbol;Acc:MGI:101932]	1.24152	0.0129255	1.29264	5.6646e-08	1.268	1.32608e-09
ENSG00000156140	ADAMTS3	ADAM metallopeptidase with thrombospondin type 1 motif, 3 [Source:HGNC Symbol;Acc:HGNC:219]	1.52444	0.000110248		ENSMUSG00000043635	Adamts3	a disintegrin-like and metallopeptidase (reprolysin type) with thrombospondin type 1 motif, 3 [Source:MGI Symbol;Acc:MGI:3045353]	0.919343	0.571196	0.974801	0.789797	0.991711	0.980008
ENSG00000094975	SUCO	SUN domain containing ossification factor [Source:HGNC Symbol;Acc:HGNC:1240]	1.5243	7.70346e-05		ENSMUSG00000040297	Suco	SUN domain containing ossification factor [Source:MGI Symbol;Acc:MGI:2138346]	2.28106	2.56495e-23	1.62979	5.80335e-21	1.40679	6.39179e-10
ENSG00000183255	PTTG1IP	pituitary tumor-transforming 1 interacting protein [Source:HGNC Symbol;Acc:HGNC:13524]	1.52383	9.53784e-07		ENSMUSG00000009291	Pttg1ip	pituitary tumor-transforming 1 interacting protein [Source:MGI Symbol;Acc:MGI:2652132]	1.99122	3.03102e-14	1.46682	1.32957e-11	1.5472	1.12324e-21
ENSG00000117152	RGS4	regulator of G-protein signaling 4 [Source:HGNC Symbol;Acc:HGNC:10000]	1.52328	4.71679e-05		ENSMUSG00000038530	Rgs4	regulator of G-protein signaling 4 [Source:MGI Symbol;Acc:MGI:108409]	1.74606	4.35249e-05	12.0487	1.57636e-36	2.59665	7.98953e-08
ENSG00000138413	IDH1	isocitrate dehydrogenase 1 (NADP+), soluble [Source:HGNC Symbol;Acc:HGNC:5382]	1.5229	4.5848e-07		ENSMUSG00000025950	Idh1	isocitrate dehydrogenase 1 (NADP+), soluble [Source:MGI Symbol;Acc:MGI:96413]	0.87101	0.0821367	0.92209	0.188123	1.01675	0.770742
ENSG00000158796	DEDD	death effector domain containing [Source:HGNC Symbol;Acc:HGNC:2755]	1.5226	1.13015e-05		ENSMUSG00000013973	Dedd	death effector domain-containing [Source:MGI Symbol;Acc:MGI:1333874]	0.812839	0.0746856	1.00621	0.979185	1.05893	0.718432
ENSG00000147416	ATP6V1B2	ATPase, H+ transporting, lysosomal 56/58kDa, V1 subunit B2 [Source:HGNC Symbol;Acc:HGNC:854]	1.52252	1.10222e-12		ENSMUSG00000006273	Atp6v1b2	ATPase, H+ transporting, lysosomal V1 subunit B2 [Source:MGI Symbol;Acc:MGI:109618]	0.99021	0.945835	1.19971	0.000259889	1.25137	4.40276e-08
ENSG00000143195	ILDR2	immunoglobulin-like domain containing receptor 2 [Source:HGNC Symbol;Acc:HGNC:18131]	1.52246	0.000480369		ENSMUSG00000040612	Ildr2	immunoglobulin-like domain containing receptor 2 [Source:MGI Symbol;Acc:MGI:1196370]	0.899768	0.406794	1.05758	0.528858	1.33293	2.9239e-07
ENSG00000138606	SHF	Src homology 2 domain containing F [Source:HGNC Symbol;Acc:HGNC:25116]	1.52229	1.47959e-05		ENSMUSG00000033256	Shf	Src homology 2 domain containing F [Source:MGI Symbol;Acc:MGI:3613669]	1.13709	0.443539	0.852128	0.0539075	1.2263	0.0151682
ENSG00000113916	BCL6	B-cell CLL/lymphoma 6 [Source:HGNC Symbol;Acc:HGNC:1001]	1.52213	0.000386693		ENSMUSG00000022508	Bcl6	B cell leukemia/lymphoma 6 [Source:MGI Symbol;Acc:MGI:107187]	1.46076	0.00197197	3.09925	6.28395e-59	2.00227	2.4553e-08
ENSG00000185716	C16orf52	chromosome 16 open reading frame 52 [Source:HGNC Symbol;Acc:HGNC:27087]	1.52175	2.00562e-05		ENSMUSG00000046096	BC030336	cDNA sequence BC030336 [Source:MGI Symbol;Acc:MGI:2446240]	0.830536	0.0185409	0.930873	0.346525	1.12978	0.080008
ENSG00000166165	CKB	creatine kinase, brain [Source:HGNC Symbol;Acc:HGNC:1991]	1.52138	6.05171e-07		ENSMUSG00000001270	Ckb	creatine kinase, brain [Source:MGI Symbol;Acc:MGI:88407]	1.33888	0.00856327	1.22082	3.57682e-05	1.32943	1.01863e-11
ENSG00000169991	IFFO2	intermediate filament family orphan 2 [Source:HGNC Symbol;Acc:HGNC:27006]	1.52112	1.53518e-05		ENSMUSG00000041025	Iffo2	intermediate filament family orphan 2 [Source:MGI Symbol;Acc:MGI:2140675]	0.660584	2.81485e-05	0.545833	2.37831e-17	1.23684	0.0017021
ENSG00000182670	TTC3	tetratricopeptide repeat domain 3 [Source:HGNC Symbol;Acc:HGNC:12393]	1.521	2.75592e-06		ENSMUSG00000040785	Ttc3	tetratricopeptide repeat domain 3 [Source:MGI Symbol;Acc:MGI:1276539]	1.14182	0.132114	1.42244	9.73114e-12	1.2157	2.74085e-06
ENSG00000044574	HSPA5	heat shock 70kDa protein 5 (glucose-regulated protein, 78kDa) [Source:HGNC Symbol;Acc:HGNC:5238]	1.52028	3.15183e-12		ENSMUSG00000026864	Hspa5	heat shock protein 5 [Source:MGI Symbol;Acc:MGI:95835]	2.87697	3.05792e-21	2.28096	6.49778e-46	1.3437	2.26955e-08
ENSG00000241697	TMEFF1	transmembrane protein with EGF-like and two follistatin-like domains 1 [Source:HGNC Symbol;Acc:HGNC:11866]	1.52016	0.00129067		ENSMUSG00000028347	Tmeff1	transmembrane protein with EGF-like and two follistatin-like domains 1 [Source:MGI Symbol;Acc:MGI:1926810]	0.960079	0.789858	1.09129	0.129928	1.06064	0.263444
ENSG00000185988	PLK5	polo-like kinase 5 [Source:HGNC Symbol;Acc:HGNC:27001]	1.51979	0.0137371		ENSMUSG00000035486	Plk5	polo-like kinase 5 [Source:MGI Symbol;Acc:MGI:3026984]	1.30104	0.3942	1.00005	0.978605	1.37595	0.000699166
ENSG00000196498	NCOR2	nuclear receptor corepressor 2 [Source:HGNC Symbol;Acc:HGNC:7673]	1.51977	4.56938e-07		ENSMUSG00000029478	Ncor2	nuclear receptor co-repressor 2 [Source:MGI Symbol;Acc:MGI:1337080]	1.24097	0.000935706	1.1677	0.0496437	1.28781	0.078722
ENSG00000153006	SREK1IP1	SREK1-interacting protein 1 [Source:HGNC Symbol;Acc:HGNC:26716]	1.51975	0.00013752		ENSMUSG00000021716	Srek1ip1	splicing regulatory glutamine/lysine-rich protein 1interacting protein 1 [Source:MGI Symbol;Acc:MGI:1914538]	0.48329	2.18802e-09	0.557292	4.99918e-12	0.595422	4.36376e-09
ENSG00000130147	SH3BP4	SH3-domain binding protein 4 [Source:HGNC Symbol;Acc:HGNC:10826]	1.51972	5.64961e-06		ENSMUSG00000036206	Sh3bp4	SH3-domain binding protein 4 [Source:MGI Symbol;Acc:MGI:2138297]	0.703344	0.000379303	0.84456	0.0142656	1.57092	9.34193e-16
ENSG00000146112	PPP1R18	protein phosphatase 1, regulatory subunit 18 [Source:HGNC Symbol;Acc:HGNC:29413]	1.51945	4.05268e-07		ENSMUSG00000034595	Ppp1r18	protein phosphatase 1, regulatory subunit 18 [Source:MGI Symbol;Acc:MGI:1923698]	1.29186	0.0584232	0.549572	2.16058e-15	1.31464	0.000201273
ENSG00000095203	EPB41L4B	erythrocyte membrane protein band 4.1 like 4B [Source:HGNC Symbol;Acc:HGNC:19818]	1.51916	3.53232e-12		ENSMUSG00000028434	Epb4.1l4b	erythrocyte protein band 4.1 like 4b [Source:MGI Symbol;Acc:MGI:1859149]	1.15916	0.603893	0.90361	0.52918	0.907061	0.279338
ENSG00000152242	C18orf25	chromosome 18 open reading frame 25 [Source:HGNC Symbol;Acc:HGNC:28172]	1.51911	2.93254e-05		ENSMUSG00000047466	8030462N17Rik	RIKEN cDNA 8030462N17 gene [Source:MGI Symbol;Acc:MGI:2444951]	1.06462	0.785359	1.28093	0.0010849	1.46926	8.80757e-06
ENSG00000054356	PTPRN	protein tyrosine phosphatase, receptor type, N [Source:HGNC Symbol;Acc:HGNC:9676]	1.51904	0.0420302		ENSMUSG00000026204	Ptprn	protein tyrosine phosphatase, receptor type, N [Source:MGI Symbol;Acc:MGI:102765]	1.28073	0.00539977	3.63031	2.87227e-127	1.75677	7.33189e-30
ENSG00000187860	CCDC157	coiled-coil domain containing 157 [Source:HGNC Symbol;Acc:HGNC:33854]	1.51903	6.05256e-06		ENSMUSG00000051427	Ccdc157	coiled-coil domain containing 157 [Source:MGI Symbol;Acc:MGI:3041210]	1.05809	0.807251	0.965181	0.715082	1.19895	0.00434892
ENSG00000075420	FNDC3B	fibronectin type III domain containing 3B [Source:HGNC Symbol;Acc:HGNC:24670]	1.51861	7.21837e-05		ENSMUSG00000039286	Fndc3b	fibronectin type III domain containing 3B [Source:MGI Symbol;Acc:MGI:1919257]	1.62627	1.1066e-06	1.67217	9.62097e-18	1.47145	8.52524e-17
ENSG00000126003	PLAGL2	pleiomorphic adenoma gene-like 2 [Source:HGNC Symbol;Acc:HGNC:9047]	1.51848	1.44248e-11		ENSMUSG00000051413	Plagl2	pleiomorphic adenoma gene-like 2 [Source:MGI Symbol;Acc:MGI:1933165]	0.628315	0.00779676	0.877805	0.417953	1.26944	0.00180735
ENSG00000205903	ZNF316	zinc finger protein 316 [Source:HGNC Symbol;Acc:HGNC:13843]	1.51835	0.000948315		ENSMUSG00000046658	Zfp316	zinc finger protein 316 [Source:MGI Symbol;Acc:MGI:1860402]	0.406147	5.44842e-34	0.506297	1.94405e-29	0.520287	1.18382e-19
ENSG00000197540	GZMM	granzyme M (lymphocyte met-ase 1) [Source:HGNC Symbol;Acc:HGNC:4712]	1.51808	0.368491		ENSMUSG00000054206	Gzmm	granzyme M (lymphocyte met-ase 1) [Source:MGI Symbol;Acc:MGI:99549]	1.6105	0.0581792	1.77281	0.000458873	1.46301	0.163656
ENSG00000099822	HCN2	hyperpolarization activated cyclic nucleotide gated potassium channel 2 [Source:HGNC Symbol;Acc:HGNC:4846]	1.51781	5.36754e-05		ENSMUSG00000020331	Hcn2	hyperpolarization-activated, cyclic nucleotide-gated K+ 2 [Source:MGI Symbol;Acc:MGI:1298210]	0.863708	0.297796	0.780943	0.00129064	0.93221	0.393555
ENSG00000104142	VPS18	vacuolar protein sorting 18 homolog (S. cerevisiae) [Source:HGNC Symbol;Acc:HGNC:15972]	1.51721	5.01543e-05		ENSMUSG00000034216	Vps18	vacuolar protein sorting 18 (yeast) [Source:MGI Symbol;Acc:MGI:2443626]	0.94776	0.712562	0.924376	0.320079	1.21075	0.00271585
ENSG00000197111	PCBP2	poly(rC) binding protein 2 [Source:HGNC Symbol;Acc:HGNC:8648]	1.51713	2.72057e-07		ENSMUSG00000056851	Pcbp2	poly(rC) binding protein 2 [Source:MGI Symbol;Acc:MGI:108202]	1.45902	7.25125e-08	1.36956	5.57683e-07	1.56108	5.4442e-27
ENSG00000198894	CIPC	CLOCK-interacting pacemaker [Source:HGNC Symbol;Acc:HGNC:20365]	1.51618	5.45451e-06		ENSMUSG00000034157	Cipc	CLOCK interacting protein, circadian [Source:MGI Symbol;Acc:MGI:1919185]	0.516507	1.45617e-23	0.595497	8.33141e-17	0.566869	1.85064e-20
ENSG00000093000	NUP50	nucleoporin 50kDa [Source:HGNC Symbol;Acc:HGNC:8065]	1.5157	0.00024387		ENSMUSG00000016619	Nup50	nucleoporin 50 [Source:MGI Symbol;Acc:MGI:1351502]	1.31799	0.00763647	1.39661	9.26511e-08	1.46141	1.07841e-10
ENSG00000219200	RNASEK	ribonuclease, RNase K [Source:HGNC Symbol;Acc:HGNC:33911]	1.51565	0.000389647		ENSMUSG00000093989	Rnasek	ribonuclease, RNase K [Source:MGI Symbol;Acc:MGI:106369]	1.53642	0.0716391	2.86395	9.59752e-05	2.14763	0.0424654
ENSG00000183576	SETD3	SET domain containing 3 [Source:HGNC Symbol;Acc:HGNC:20493]	1.51555	9.73251e-10		ENSMUSG00000056770	Setd3	SET domain containing 3 [Source:MGI Symbol;Acc:MGI:1289184]	1.23173	0.00155837	1.24112	0.000372634	1.23568	1.4954e-05
ENSG00000096384	HSP90AB1	heat shock protein 90kDa alpha (cytosolic), class B member 1 [Source:HGNC Symbol;Acc:HGNC:5258]	1.5155	9.77519e-07		ENSMUSG00000023944	Hsp90ab1	heat shock protein 90 alpha (cytosolic), class B member 1 [Source:MGI Symbol;Acc:MGI:96247]	1.33126	1.45148e-07	1.40458	1.32957e-11	1.35056	4.43449e-15
ENSG00000256463	SALL3	spalt-like transcription factor 3 [Source:HGNC Symbol;Acc:HGNC:10527]	1.51543	2.72341e-05		ENSMUSG00000024565	Sall3	sal-like 3 (Drosophila) [Source:MGI Symbol;Acc:MGI:109295]	1.12327	0.528235	1.60186	8.72173e-16	1.52821	5.61811e-08
ENSG00000100124	ANKRD54	ankyrin repeat domain 54 [Source:HGNC Symbol;Acc:HGNC:25185]	1.51533	3.11334e-06		ENSMUSG00000033055	Ankrd54	ankyrin repeat domain 54 [Source:MGI Symbol;Acc:MGI:2444209]	0.811577	0.0977802	0.913892	0.316795	1.03711	0.749149
ENSG00000010310	GIPR	gastric inhibitory polypeptide receptor [Source:HGNC Symbol;Acc:HGNC:4271]	1.51532	0.194968		ENSMUSG00000030406	Gipr	gastric inhibitory polypeptide receptor [Source:MGI Symbol;Acc:MGI:1352753]	0.853527	0.51776	0.834644	0.120371	1.20039	0.0830977
ENSG00000127870	RNF6	ring finger protein (C3H2C3 type) 6 [Source:HGNC Symbol;Acc:HGNC:10069]	1.51506	0.00329245		ENSMUSG00000029634	Rnf6	ring finger protein (C3H2C3 type) 6 [Source:MGI Symbol;Acc:MGI:1921382]	0.739275	0.0050105	0.921316	0.343518	1.2248	0.00246251
ENSG00000097021	ACOT7	acyl-CoA thioesterase 7 [Source:HGNC Symbol;Acc:HGNC:24157]	1.51496	3.86451e-09		ENSMUSG00000028937	Acot7	acyl-CoA thioesterase 7 [Source:MGI Symbol;Acc:MGI:1917275]	0.98799	0.938341	0.73352	9.77758e-08	1.13822	0.00769179
ENSG00000139190	VAMP1	vesicle-associated membrane protein 1 (synaptobrevin 1) [Source:HGNC Symbol;Acc:HGNC:12642]	1.51448	3.60438e-08		ENSMUSG00000030337	Vamp1	vesicle-associated membrane protein 1 [Source:MGI Symbol;Acc:MGI:1313276]	1.26653	0.0810889	1.24884	0.0918084	1.34457	9.54833e-10
ENSG00000168439	STIP1	stress-induced phosphoprotein 1 [Source:HGNC Symbol;Acc:HGNC:11387]	1.51398	3.54078e-06		ENSMUSG00000024966	Stip1	stress-induced phosphoprotein 1 [Source:MGI Symbol;Acc:MGI:109130]	0.93017	0.376702	0.847654	0.0022146	1.05376	0.362804
ENSG00000115966	ATF2	activating transcription factor 2 [Source:HGNC Symbol;Acc:HGNC:784]	1.51388	5.76956e-09		ENSMUSG00000027104	Atf2	activating transcription factor 2 [Source:MGI Symbol;Acc:MGI:109349]	0.958576	0.624097	1.09674	0.172768	1.0471	0.428473
ENSG00000158292	GPR153	G protein-coupled receptor 153 [Source:HGNC Symbol;Acc:HGNC:23618]	1.51378	0.0142534		ENSMUSG00000042804	Gpr153	G protein-coupled receptor 153 [Source:MGI Symbol;Acc:MGI:1916157]	0.765113	0.00989388	0.904186	0.304847	1.11321	0.0878469
ENSG00000127481	UBR4	ubiquitin protein ligase E3 component n-recognin 4 [Source:HGNC Symbol;Acc:HGNC:30313]	1.51329	5.19436e-05		ENSMUSG00000066036	Ubr4	ubiquitin protein ligase E3 component n-recognin 4 [Source:MGI Symbol;Acc:MGI:1916366]	1.39936	0.000140654	1.33524	2.37094e-09	1.28289	6.68819e-08
[truncated: 9,844 more rows]
