# Supplementary material for: Evidence for evolutionary divergence of activity-dependent gene expression in developing neurons
Source: eLife journal article supplement (doi:10.7554/elife.20337), 2016-10-01
Supplement: supp [file elife-20337-supp-v1.zip › elife_poa_e20337_Figure_2_source_data_2.xlsx]

## Sheet: Fig. S2e
human_gene	human_gene_name	human_description	Fold Change (Hum-ESC-neurons)	Fold Change Mus DIV10 CORT neurons	LOG2(DRI)-Hun-ESC vs Mus DIV10 CORT	Basal Hum-ESC neurons (FPKM)	Basal Mus-DIV10 CORT neurons	LOG2(DBEI)-Hum-ESC vs Mus DIV10 CORT	.
ENSG00000111262	KCNA1	potassium channel, voltage gated shaker related subfamily A, member 1 [Source:HGNC Symbol;Acc:HGNC:6218]	12.6156	1.08472	3.53982	0.140885	5.27157	-5.22564
ENSG00000186594	MIR22HG	MIR22 host gene [Source:HGNC Symbol;Acc:HGNC:28219]	10.0308	1.00211	3.32332	3.01166	14.2478	-2.24211
ENSG00000171246	NPTX1	neuronal pentraxin I [Source:HGNC Symbol;Acc:HGNC:7952]	15.013	1.59155	3.23771	5.84612	8.26894	-0.500223
ENSG00000197921	HES5	hes family bHLH transcription factor 5 [Source:HGNC Symbol;Acc:HGNC:19764]	0.981226	0.111875	3.1327	11.176	6.32833	0.82051
ENSG00000187626	ZKSCAN4	zinc finger with KRAB and SCAN domains 4 [Source:HGNC Symbol;Acc:HGNC:13854]	0.669287	0.0777075	3.1065	4.41872	2.20548	1.00254
ENSG00000160179	ABCG1	ATP-binding cassette, sub-family G (WHITE), member 1 [Source:HGNC Symbol;Acc:HGNC:73]	3.28377	0.39969	3.0384	3.35404	3.30293	0.0221563
ENSG00000278129	ZNF8	zinc finger protein 8 [Source:HGNC Symbol;Acc:HGNC:13154]	1.05488	0.131004	3.00939	2.66209	2.8219	-0.0841089
ENSG00000179388	EGR3	early growth response 3 [Source:HGNC Symbol;Acc:HGNC:3240]	26.2577	3.80006	2.78865	0.197786	17.5389	-6.47047
ENSG00000144647	POMGNT2	protein O-linked mannose N-acetylglucosaminyltransferase 2 (beta 1,4-) [Source:HGNC Symbol;Acc:HGNC:25902]	1.39975	0.217673	2.68494	27.3783	19.7224	0.473194
ENSG00000207870	MIR221	microRNA 221 [Source:HGNC Symbol;Acc:HGNC:31601]	15.1639	2.40108	2.65888	0.0846333	0.729744	-3.10809
ENSG00000135750	KCNK1	potassium channel, two pore domain subfamily K, member 1 [Source:HGNC Symbol;Acc:HGNC:6272]	5.74274	0.930657	2.62542	2.71513	16.4819	-2.60179
ENSG00000119737	GPR75	G protein-coupled receptor 75 [Source:HGNC Symbol;Acc:HGNC:4526]	3.50633	0.575449	2.6072	0.575189	2.09809	-1.86697
ENSG00000198435	NRARP	NOTCH-regulated ankyrin repeat protein [Source:HGNC Symbol;Acc:HGNC:33843]	1.89951	0.321371	2.56332	11.2568	2.28448	2.30086
ENSG00000164086	DUSP7	dual specificity phosphatase 7 [Source:HGNC Symbol;Acc:HGNC:3073]	1.53386	0.263791	2.5397	8.59168	14.8682	-0.791221
ENSG00000128285	MCHR1	melanin-concentrating hormone receptor 1 [Source:HGNC Symbol;Acc:HGNC:4479]	5.9918	1.0333	2.53573	2.39022	2.21445	0.110196
ENSG00000130164	LDLR	low density lipoprotein receptor [Source:HGNC Symbol;Acc:HGNC:6547]	4.43166	0.777664	2.51063	7.54694	12.1151	-0.682838
ENSG00000167550	RHEBL1	Ras homolog enriched in brain like 1 [Source:HGNC Symbol;Acc:HGNC:21166]	3.21047	0.572703	2.48693	1.53995	11.4079	-2.88907
ENSG00000158792	SPATA2L	spermatogenesis associated 2-like [Source:HGNC Symbol;Acc:HGNC:28393]	4.39331	0.789525	2.47625	7.55018	13.6227	-0.851432
ENSG00000099625	CBARP	calcium channel, voltage-dependent, beta subunit associated regulatory protein [Source:HGNC Symbol;Acc:HGNC:28617]	5.34159	0.969747	2.46159	19.4855	102.685	-2.39775
ENSG00000185924	RTN4RL1	reticulon 4 receptor-like 1 [Source:HGNC Symbol;Acc:HGNC:21329]	2.53812	0.466999	2.44227	4.25892	17.3978	-2.03035
ENSG00000281398	SNHG4	small nucleolar RNA host gene 4 [Source:HGNC Symbol;Acc:HGNC:32964]	3.38588	0.626945	2.43312	0.57499	7.20486	-3.64736
ENSG00000273274	ZBTB8B	zinc finger and BTB domain containing 8B [Source:HGNC Symbol;Acc:HGNC:37057]	0.615236	0.115898	2.40828	2.40794	1.96464	0.293533
ENSG00000100219	XBP1	X-box binding protein 1 [Source:HGNC Symbol;Acc:HGNC:12801]	3.46146	0.654314	2.40332	15.1933	31.4851	-1.05123
ENSG00000122254	HS3ST2	heparan sulfate (glucosamine) 3-O-sulfotransferase 2 [Source:HGNC Symbol;Acc:HGNC:5195]	6.52271	1.24247	2.39226	1.72304	16.1475	-3.22828
ENSG00000276600	RAB7B	RAB7B, member RAS oncogene family [Source:HGNC Symbol;Acc:HGNC:30513]	3.78533	0.732494	2.36953	0.317391	0.630162	-0.989461
ENSG00000142544	CTU1	cytosolic thiouridylase subunit 1 [Source:HGNC Symbol;Acc:HGNC:29590]	0.860693	0.167284	2.3632	4.46432	7.75099	-0.795942
ENSG00000163961	RNF168	ring finger protein 168, E3 ubiquitin protein ligase [Source:HGNC Symbol;Acc:HGNC:26661]	2.03754	0.405341	2.32962	3.97549	10.301	-1.37358
ENSG00000170214	ADRA1B	adrenoceptor alpha 1B [Source:HGNC Symbol;Acc:HGNC:278]	4.28919	0.856586	2.32403	2.307	2.34186	-0.0216329
ENSG00000145506	NKD2	naked cuticle homolog 2 (Drosophila) [Source:HGNC Symbol;Acc:HGNC:17046]	5.4227	1.10721	2.29208	6.26863	2.18831	1.51833
ENSG00000173258	ZNF483	zinc finger protein 483 [Source:HGNC Symbol;Acc:HGNC:23384]	1.05258	0.215481	2.2883	1.54056	2.6248	-0.768754
ENSG00000109089	CDR2L	cerebellar degeneration-related protein 2-like [Source:HGNC Symbol;Acc:HGNC:29999]	2.77861	0.577638	2.26613	9.26123	7.52186	0.300115
ENSG00000100285	NEFH	neurofilament, heavy polypeptide [Source:HGNC Symbol;Acc:HGNC:7737]	1.53418	0.330391	2.21522	3.51696	4.8253	-0.456289
ENSG00000066735	KIF26A	kinesin family member 26A [Source:HGNC Symbol;Acc:HGNC:20226]	1.84386	0.39771	2.21294	3.54238	2.52816	0.486628
ENSG00000182318	ZSCAN22	zinc finger and SCAN domain containing 22 [Source:HGNC Symbol;Acc:HGNC:4929]	1.21854	0.265537	2.19817	2.02679	2.81566	-0.474278
ENSG00000204060	FOXO6	forkhead box O6 [Source:HGNC Symbol;Acc:HGNC:24814]	2.66213	0.581152	2.19559	7.2203	30.0747	-2.05842
ENSG00000198805	PNP	purine nucleoside phosphorylase [Source:HGNC Symbol;Acc:HGNC:7892]	2.39551	0.524145	2.1923	4.53954	4.09268	0.1495
ENSG00000143067	ZNF697	zinc finger protein 697 [Source:HGNC Symbol;Acc:HGNC:32034]	1.28391	0.281755	2.18803	13.9406	4.83812	1.52677
ENSG00000197362	ZNF786	zinc finger protein 786 [Source:HGNC Symbol;Acc:HGNC:21806]	0.687899	0.151126	2.18645	5.43445	2.12038	1.35781
ENSG00000171621	SPSB1	splA/ryanodine receptor domain and SOCS box containing 1 [Source:HGNC Symbol;Acc:HGNC:30628]	6.99343	1.55077	2.17302	0.445937	3.11023	-2.80211
ENSG00000214309	MBLAC1	metallo-beta-lactamase domain containing 1 [Source:HGNC Symbol;Acc:HGNC:22180]	1.81024	0.406356	2.15536	3.77844	3.73629	0.0161833
ENSG00000171174	RBKS	ribokinase [Source:HGNC Symbol;Acc:HGNC:30325]	3.75953	0.84541	2.15283	1.60309	0.889781	0.849335
ENSG00000260001	TGFBR3L	transforming growth factor, beta receptor III-like [Source:HGNC Symbol;Acc:HGNC:44152]	0.888442	0.200092	2.15062	0.999537	2.66235	-1.41337
ENSG00000136213	CHST12	carbohydrate (chondroitin 4) sulfotransferase 12 [Source:HGNC Symbol;Acc:HGNC:17423]	0.867833	0.196503	2.14287	1.2313	10.3523	-3.07169
ENSG00000116903	EXOC8	exocyst complex component 8 [Source:HGNC Symbol;Acc:HGNC:24659]	1.08581	0.246656	2.1382	5.51074	6.03842	-0.131924
ENSG00000151470	C4orf33	chromosome 4 open reading frame 33 [Source:HGNC Symbol;Acc:HGNC:27025]	4.17285	0.955861	2.12616	2.71946	1.09977	1.30612
ENSG00000104856	RELB	v-rel avian reticuloendotheliosis viral oncogene homolog B [Source:HGNC Symbol;Acc:HGNC:9956]	9.02962	2.09415	2.1083	1.27708	1.00036	0.35233
ENSG00000183307	CECR6	cat eye syndrome chromosome region, candidate 6 [Source:HGNC Symbol;Acc:HGNC:1844]	0.994725	0.231397	2.10393	10.8036	11.6013	-0.102781
ENSG00000134480	CCNH	cyclin H [Source:HGNC Symbol;Acc:HGNC:1594]	3.67807	0.868252	2.08276	13.9721	24.6875	-0.821235
ENSG00000166002	SMCO4	single-pass membrane protein with coiled-coil domains 4 [Source:HGNC Symbol;Acc:HGNC:24810]	2.08001	0.492261	2.0791	1.44301	2.06487	-0.516976
ENSG00000183665	TRMT12	tRNA methyltransferase 12 homolog (S. cerevisiae) [Source:HGNC Symbol;Acc:HGNC:26091]	1.25085	0.296368	2.07745	6.49104	2.40615	1.43172
ENSG00000166886	NAB2	NGFI-A binding protein 2 (EGR1 binding protein 2) [Source:HGNC Symbol;Acc:HGNC:7627]	4.37924	1.04254	2.07057	15.8977	6.38336	1.31643
ENSG00000159167	STC1	stanniocalcin 1 [Source:HGNC Symbol;Acc:HGNC:11373]	3.96951	0.945768	2.0694	4.19219	5.72802	-0.450335
ENSG00000144815	NXPE3	neurexophilin and PC-esterase domain family, member 3 [Source:HGNC Symbol;Acc:HGNC:28238]	1.25571	0.299321	2.06874	4.95046	1.70226	1.54011
ENSG00000170425	ADORA2B	adenosine A2b receptor [Source:HGNC Symbol;Acc:HGNC:264]	1.64671	0.393471	2.06526	1.42956	1.36343	0.0683343
ENSG00000254470	AP5B1	adaptor-related protein complex 5, beta 1 subunit [Source:HGNC Symbol;Acc:HGNC:25104]	1.44605	0.348284	2.05378	5.07635	1.42162	1.83626
ENSG00000106346	USP42	ubiquitin specific peptidase 42 [Source:HGNC Symbol;Acc:HGNC:20068]	1.7098	0.413781	2.04689	10.5774	8.27091	0.354866
ENSG00000203952	CCDC160	coiled-coil domain containing 160 [Source:HGNC Symbol;Acc:HGNC:37286]	1.60687	0.390337	2.04146	4.30817	1.14417	1.91277
ENSG00000151151	IPMK	inositol polyphosphate multikinase [Source:HGNC Symbol;Acc:HGNC:20739]	2.05152	0.499655	2.03769	4.26097	8.90585	-1.06357
ENSG00000171303	KCNK3	potassium channel, two pore domain subfamily K, member 3 [Source:HGNC Symbol;Acc:HGNC:6278]	2.0856	0.512549	2.0247	9.15465	4.41663	1.05156
ENSG00000215012	C22orf29	chromosome 22 open reading frame 29 [Source:HGNC Symbol;Acc:HGNC:26112]	0.935403	0.229895	2.02461	7.56298	1.75135	2.11049
ENSG00000137962	ARHGAP29	Rho GTPase activating protein 29 [Source:HGNC Symbol;Acc:HGNC:30207]	3.3104	0.814318	2.02334	1.25497	3.03238	-1.27279
ENSG00000157613	CREB3L1	cAMP responsive element binding protein 3-like 1 [Source:HGNC Symbol;Acc:HGNC:18856]	3.36335	0.833354	2.0129	3.88184	4.92784	-0.344214
ENSG00000060138	YBX3	Y box binding protein 3 [Source:HGNC Symbol;Acc:HGNC:2428]	2.81436	0.702423	2.00239	1.81392	47.2936	-4.70446
ENSG00000254656	RTL1	retrotransposon-like 1 [Source:HGNC Symbol;Acc:HGNC:14665]	2.19907	0.553574	1.99005	2.85015	1.32589	1.10407
ENSG00000182362	YBEY	ybeY metallopeptidase (putative) [Source:HGNC Symbol;Acc:HGNC:1299]	0.902959	0.227427	1.98926	8.78532	0.872123	3.33249
ENSG00000146858	ZC3HAV1L	zinc finger CCCH-type, antiviral 1-like [Source:HGNC Symbol;Acc:HGNC:22423]	1.02834	0.261543	1.9752	1.09147	1.28784	-0.23868
ENSG00000160062	ZBTB8A	zinc finger and BTB domain containing 8A [Source:HGNC Symbol;Acc:HGNC:24172]	0.759879	0.193495	1.97348	3.14572	2.74474	0.196719
ENSG00000151025	GPR158	G protein-coupled receptor 158 [Source:HGNC Symbol;Acc:HGNC:23689]	2.73381	0.703372	1.95855	1.30387	4.71608	-1.85478
ENSG00000103642	LACTB	lactamase, beta [Source:HGNC Symbol;Acc:HGNC:16468]	1.37726	0.354841	1.95656	4.11058	8.4306	-1.03629
ENSG00000250366	TUNAR	TCL1 upstream neural differentiation-associated RNA [Source:HGNC Symbol;Acc:HGNC:44088]	3.77257	0.980423	1.94407	12.0341	10.5663	0.187655
ENSG00000172171	TEFM	transcription elongation factor, mitochondrial [Source:HGNC Symbol;Acc:HGNC:26223]	0.916021	0.238992	1.93842	3.15619	3.59779	-0.188927
ENSG00000116133	DHCR24	24-dehydrocholesterol reductase [Source:HGNC Symbol;Acc:HGNC:2859]	3.28923	0.85878	1.93739	43.4493	56.2848	-0.373413
ENSG00000158470	B4GALT5	UDP-Gal:betaGlcNAc beta 1,4- galactosyltransferase, polypeptide 5 [Source:HGNC Symbol;Acc:HGNC:928]	1.90833	0.501777	1.9272	33.4709	14.5433	1.20255
ENSG00000207864	MIR27B	microRNA 27b [Source:HGNC Symbol;Acc:HGNC:31614]	1.6231	0.427238	1.92564	1.19616	4.49917	-1.91125
ENSG00000040608	RTN4R	reticulon 4 receptor [Source:HGNC Symbol;Acc:HGNC:18601]	1.44754	0.383208	1.9174	12.6132	28.2595	-1.16381
ENSG00000169981	ZNF35	zinc finger protein 35 [Source:HGNC Symbol;Acc:HGNC:13099]	1.67083	0.44518	1.9081	3.8001	1.22653	1.63145
ENSG00000205903	ZNF316	zinc finger protein 316 [Source:HGNC Symbol;Acc:HGNC:13843]	1.51835	0.406147	1.90243	27.8095	7.03796	1.98235
ENSG00000117143	UAP1	UDP-N-acetylglucosamine pyrophosphorylase 1 [Source:HGNC Symbol;Acc:HGNC:12457]	3.63377	0.977211	1.89472	13.3798	32.5293	-1.28168
ENSG00000177125	ZBTB34	zinc finger and BTB domain containing 34 [Source:HGNC Symbol;Acc:HGNC:31446]	1.53549	0.413072	1.89423	5.40488	8.96816	-0.730548
ENSG00000162413	KLHL21	kelch-like family member 21 [Source:HGNC Symbol;Acc:HGNC:29041]	2.10709	0.569206	1.88823	3.78915	4.40389	-0.216903
ENSG00000173805	HAP1	huntingtin-associated protein 1 [Source:HGNC Symbol;Acc:HGNC:4812]	3.57943	0.969892	1.88383	1.9571	27.2008	-3.79687
ENSG00000178163	ZNF518B	zinc finger protein 518B [Source:HGNC Symbol;Acc:HGNC:29365]	1.36747	0.373466	1.87246	8.88323	5.98849	0.568893
ENSG00000175087	PDIK1L	PDLIM1 interacting kinase 1 like [Source:HGNC Symbol;Acc:HGNC:18981]	0.806938	0.22067	1.87057	21.9469	6.89447	1.6705
ENSG00000143171	RXRG	retinoid X receptor, gamma [Source:HGNC Symbol;Acc:HGNC:10479]	1.09792	0.30062	1.86876	3.67829	8.75177	-1.25054
ENSG00000249992	TMEM158	transmembrane protein 158 (gene/pseudogene) [Source:HGNC Symbol;Acc:HGNC:30293]	2.23077	0.612258	1.86533	12.3875	75.7	-2.61141
ENSG00000185338	SOCS1	suppressor of cytokine signaling 1 [Source:HGNC Symbol;Acc:HGNC:19383]	2.01621	0.553478	1.86505	0.575599	1.50911	-1.39057
ENSG00000187867	PALM3	paralemmin 3 [Source:HGNC Symbol;Acc:HGNC:33274]	2.19549	0.602841	1.86469	3.04334	5.11382	-0.748744
ENSG00000164615	CAMLG	calcium modulating ligand [Source:HGNC Symbol;Acc:HGNC:1471]	1.48297	0.407971	1.86195	34.8022	29.8157	0.223108
ENSG00000157557	ETS2	v-ets avian erythroblastosis virus E26 oncogene homolog 2 [Source:HGNC Symbol;Acc:HGNC:3489]	3.806	1.05271	1.85417	9.05722	10.4856	-0.211272
ENSG00000124659	TBCC	tubulin folding cofactor C [Source:HGNC Symbol;Acc:HGNC:11580]	0.966851	0.268204	1.84997	20.9078	11.4703	0.866137
ENSG00000127993	RBM48	RNA binding motif protein 48 [Source:HGNC Symbol;Acc:HGNC:21785]	1.29287	0.359305	1.84729	3.70849	2.68029	0.468443
ENSG00000173875	ZNF791	zinc finger protein 791 [Source:HGNC Symbol;Acc:HGNC:26895]	1.29248	0.360066	1.8438	5.32182	1.81066	1.5554
ENSG00000172893	DHCR7	7-dehydrocholesterol reductase [Source:HGNC Symbol;Acc:HGNC:2860]	2.41579	0.674831	1.8399	29.0764	50.716	-0.802592
ENSG00000135953	MFSD9	major facilitator superfamily domain containing 9 [Source:HGNC Symbol;Acc:HGNC:28158]	1.25383	0.350717	1.83797	5.70291	1.36601	2.06173
ENSG00000109084	TMEM97	transmembrane protein 97 [Source:HGNC Symbol;Acc:HGNC:28106]	3.26619	0.914466	1.83661	10.1492	18.1766	-0.840711
ENSG00000178074	C2orf69	chromosome 2 open reading frame 69 [Source:HGNC Symbol;Acc:HGNC:26799]	2.2922	0.647354	1.82411	9.88882	8.80749	0.167067
ENSG00000119326	CTNNAL1	catenin (cadherin-associated protein), alpha-like 1 [Source:HGNC Symbol;Acc:HGNC:2512]	4.59152	1.29809	1.82258	3.6579	3.95352	-0.112124
ENSG00000211568	MIR670	microRNA 670 [Source:HGNC Symbol;Acc:HGNC:37304]	39.2989	11.1327	1.81968	0.195538	0.382824	-0.969231
ENSG00000121578	B4GALT4	UDP-Gal:betaGlcNAc beta 1,4- galactosyltransferase, polypeptide 4 [Source:HGNC Symbol;Acc:HGNC:927]	1.25983	0.362588	1.79682	4.39365	8.16365	-0.893795
ENSG00000164631	ZNF12	zinc finger protein 12 [Source:HGNC Symbol;Acc:HGNC:12902]	1.26006	0.363739	1.79251	9.39634	6.52346	0.526462
ENSG00000054967	RELT	RELT tumor necrosis factor receptor [Source:HGNC Symbol;Acc:HGNC:13764]	5.93585	1.72135	1.78591	2.6739	1.65753	0.68991
ENSG00000171612	SLC25A33	solute carrier family 25 (pyrimidine nucleotide carrier), member 33 [Source:HGNC Symbol;Acc:HGNC:29681]	2.50553	0.730482	1.77819	5.34169	10.8417	-1.02122
ENSG00000141378	PTRH2	peptidyl-tRNA hydrolase 2 [Source:HGNC Symbol;Acc:HGNC:24265]	1.55248	0.452874	1.77739	3.9267	6.3168	-0.685875
ENSG00000166173	LARP6	La ribonucleoprotein domain family, member 6 [Source:HGNC Symbol;Acc:HGNC:24012]	1.62949	0.477032	1.77226	8.28302	12.9315	-0.642658
ENSG00000127418	FGFRL1	fibroblast growth factor receptor-like 1 [Source:HGNC Symbol;Acc:HGNC:3693]	1.40919	0.413449	1.76909	7.23469	6.97961	0.0517858
ENSG00000005513	SOX8	SRY (sex determining region Y)-box 8 [Source:HGNC Symbol;Acc:HGNC:11203]	1.20738	0.354403	1.76841	6.43187	2.68808	1.25866
ENSG00000141750	STAC2	SH3 and cysteine rich domain 2 [Source:HGNC Symbol;Acc:HGNC:23990]	3.84141	1.13052	1.76466	1.26281	8.55017	-2.75931
ENSG00000186480	INSIG1	insulin induced gene 1 [Source:HGNC Symbol;Acc:HGNC:6083]	5.62932	1.65729	1.76413	26.1399	49.3467	-0.916701
ENSG00000170485	NPAS2	neuronal PAS domain protein 2 [Source:HGNC Symbol;Acc:HGNC:7895]	2.14178	0.63075	1.76367	0.905849	6.15085	-2.76344
ENSG00000105849	TWISTNB	TWIST neighbor [Source:HGNC Symbol;Acc:HGNC:18027]	1.84734	0.544258	1.76309	4.05918	3.76161	0.10984
ENSG00000180530	NRIP1	nuclear receptor interacting protein 1 [Source:HGNC Symbol;Acc:HGNC:8001]	1.73267	0.514402	1.75203	5.06887	11.4569	-1.17648
ENSG00000155090	KLF10	Kruppel-like factor 10 [Source:HGNC Symbol;Acc:HGNC:11810]	3.10931	0.923704	1.75109	8.18782	4.61471	0.827241
ENSG00000152193	RNF219	ring finger protein 219 [Source:HGNC Symbol;Acc:HGNC:20308]	0.94021	0.280385	1.74557	9.73824	4.16457	1.2255
ENSG00000100294	MCAT	malonyl CoA:ACP acyltransferase (mitochondrial) [Source:HGNC Symbol;Acc:HGNC:29622]	1.14294	0.342104	1.74024	14.0751	12.2787	0.196988
ENSG00000072310	SREBF1	sterol regulatory element binding transcription factor 1 [Source:HGNC Symbol;Acc:HGNC:11289]	1.04898	0.316647	1.72804	6.12585	17.6426	-1.52608
ENSG00000112242	E2F3	E2F transcription factor 3 [Source:HGNC Symbol;Acc:HGNC:3115]	1.73972	0.526488	1.72439	3.5062	8.78644	-1.32537
ENSG00000174405	LIG4	ligase IV, DNA, ATP-dependent [Source:HGNC Symbol;Acc:HGNC:6601]	1.37929	0.420718	1.71301	10.422	4.98586	1.06371
ENSG00000179455	MKRN3	makorin ring finger protein 3 [Source:HGNC Symbol;Acc:HGNC:7114]	1.06538	0.32636	1.70683	7.81519	12.3289	-0.657696
ENSG00000134058	CDK7	cyclin-dependent kinase 7 [Source:HGNC Symbol;Acc:HGNC:1778]	1.20487	0.36959	1.70487	12.1231	6.01623	1.01083
ENSG00000110104	CCDC86	coiled-coil domain containing 86 [Source:HGNC Symbol;Acc:HGNC:28359]	1.77677	0.54627	1.70157	5.7686	2.52798	1.19024
ENSG00000058600	POLR3E	polymerase (RNA) III (DNA directed) polypeptide E (80kD) [Source:HGNC Symbol;Acc:HGNC:30347]	1.40694	0.433457	1.6986	9.64983	9.63768	0.00181855
ENSG00000132436	FIGNL1	fidgetin-like 1 [Source:HGNC Symbol;Acc:HGNC:13286]	1.55205	0.480071	1.69285	7.95032	0.992401	3.00202
ENSG00000210112	MT-TM	mitochondrially encoded tRNA methionine [Source:HGNC Symbol;Acc:HGNC:7492]	2.51733	0.779287	1.69167	1.44105	11.5353	-3.00087
ENSG00000177051	FBXO46	F-box protein 46 [Source:HGNC Symbol;Acc:HGNC:25069]	1.0009	0.310651	1.68793	5.24165	5.14826	0.0259382
ENSG00000188486	H2AFX	H2A histone family, member X [Source:HGNC Symbol;Acc:HGNC:4739]	1.41467	0.44412	1.67144	28.3903	35.2456	-0.312044
ENSG00000110880	CORO1C	coronin, actin binding protein, 1C [Source:HGNC Symbol;Acc:HGNC:2254]	2.25755	0.710838	1.66716	40.2141	30.5449	0.396766
ENSG00000182963	GJC1	gap junction protein, gamma 1, 45kDa [Source:HGNC Symbol;Acc:HGNC:4280]	2.48342	0.783535	1.66426	3.08789	5.91841	-0.938589
ENSG00000100003	SEC14L2	SEC14-like lipid binding 2 [Source:HGNC Symbol;Acc:HGNC:10699]	2.09561	0.661232	1.66414	2.48027	3.69058	-0.573349
ENSG00000071205	ARHGAP10	Rho GTPase activating protein 10 [Source:HGNC Symbol;Acc:HGNC:26099]	3.6149	1.14067	1.66408	0.445446	2.45986	-2.46525
ENSG00000196150	ZNF250	zinc finger protein 250 [Source:HGNC Symbol;Acc:HGNC:13044]	0.830015	0.262575	1.66041	5.64455	3.92943	0.522539
ENSG00000078237	TIGAR	TP53 induced glycolysis regulatory phosphatase [Source:HGNC Symbol;Acc:HGNC:1185]	1.19021	0.376618	1.66004	6.30567	6.40987	-0.0236447
ENSG00000207563	MIR23B	microRNA 23b [Source:HGNC Symbol;Acc:HGNC:31606]	1.3151	0.416603	1.65842	0.928272	3.48755	-1.9096
ENSG00000240849	TMEM189	transmembrane protein 189 [Source:HGNC Symbol;Acc:HGNC:16735]	2.71944	0.863703	1.6547	4.14337	21.9198	-2.40336
ENSG00000153006	SREK1IP1	SREK1-interacting protein 1 [Source:HGNC Symbol;Acc:HGNC:26716]	1.51975	0.48329	1.65288	5.46328	4.92432	0.149844
ENSG00000146587	RBAK	RB-associated KRAB zinc finger [Source:HGNC Symbol;Acc:HGNC:17680]	0.900258	0.288109	1.64372	5.13894	3.99069	0.364833
ENSG00000143153	ATP1B1	ATPase, Na+/K+ transporting, beta 1 polypeptide [Source:HGNC Symbol;Acc:HGNC:804]	3.62789	1.16758	1.63561	80.0879	481.826	-2.58886
ENSG00000160999	SH2B2	SH2B adaptor protein 2 [Source:HGNC Symbol;Acc:HGNC:17381]	2.10722	0.678364	1.63521	15.1602	8.48926	0.836575
ENSG00000134594	RAB33A	RAB33A, member RAS oncogene family [Source:HGNC Symbol;Acc:HGNC:9773]	2.4008	0.774501	1.63217	20.0326	32.4691	-0.696716
ENSG00000215193	PEX26	peroxisomal biogenesis factor 26 [Source:HGNC Symbol;Acc:HGNC:22965]	1.01818	0.328958	1.63002	4.53871	5.74931	-0.341104
ENSG00000243335	KCTD7	potassium channel tetramerization domain containing 7 [Source:HGNC Symbol;Acc:HGNC:21957]	1.74411	0.564317	1.62791	32.7728	6.6567	2.29962
ENSG00000125657	TNFSF9	tumor necrosis factor (ligand) superfamily, member 9 [Source:HGNC Symbol;Acc:HGNC:11939]	2.42724	0.786935	1.625	1.94278	1.18454	0.7138
ENSG00000109762	SNX25	sorting nexin 25 [Source:HGNC Symbol;Acc:HGNC:21883]	2.69808	0.876237	1.62254	7.61401	21.4241	-1.49251
ENSG00000184916	JAG2	jagged 2 [Source:HGNC Symbol;Acc:HGNC:6189]	1.56933	0.510014	1.62154	11.2436	18.7304	-0.736282
ENSG00000147383	NSDHL	NAD(P) dependent steroid dehydrogenase-like [Source:HGNC Symbol;Acc:HGNC:13398]	2.42469	0.788199	1.62117	16.1497	54.3034	-1.74953
ENSG00000139438	FAM222A	family with sequence similarity 222, member A [Source:HGNC Symbol;Acc:HGNC:25915]	3.10489	1.01099	1.61877	13.1731	4.38149	1.5881
ENSG00000156471	PTDSS1	phosphatidylserine synthase 1 [Source:HGNC Symbol;Acc:HGNC:9587]	3.04611	0.992985	1.61713	16.141	31.88	-0.981921
ENSG00000160161	CILP2	cartilage intermediate layer protein 2 [Source:HGNC Symbol;Acc:HGNC:24213]	1.09633	0.35903	1.6105	1.62567	1.73581	-0.094578
ENSG00000166292	TMEM100	transmembrane protein 100 [Source:HGNC Symbol;Acc:HGNC:25607]	4.50051	1.47721	1.60722	0.681973	4.32476	-2.66483
ENSG00000100564	PIGH	phosphatidylinositol glycan anchor biosynthesis, class H [Source:HGNC Symbol;Acc:HGNC:8964]	1.55746	0.51239	1.60389	13.5587	2.85665	2.24682
ENSG00000106086	PLEKHA8	pleckstrin homology domain containing, family A (phosphoinositide binding specific) member 8 [Source:HGNC Symbol;Acc:HGNC:30037]	1.5629	0.515651	1.59976	7.29162	2.53049	1.52682
ENSG00000204950	LRRC10B	leucine rich repeat containing 10B [Source:HGNC Symbol;Acc:HGNC:37215]	1.3859	0.45726	1.59974	25.9018	3.15363	3.03796
ENSG00000119760	SUPT7L	suppressor of Ty 7 (S. cerevisiae)-like [Source:HGNC Symbol;Acc:HGNC:30632]	1.12643	0.37183	1.59905	21.1051	6.19481	1.76846
ENSG00000130734	ATG4D	autophagy related 4D, cysteine peptidase [Source:HGNC Symbol;Acc:HGNC:20789]	1.52846	0.504582	1.59892	12.3784	8.25493	0.584502
ENSG00000244405	ETV5	ets variant 5 [Source:HGNC Symbol;Acc:HGNC:3494]	2.89319	0.956669	1.59657	7.56918	16.6648	-1.13859
ENSG00000139354	GAS2L3	growth arrest-specific 2 like 3 [Source:HGNC Symbol;Acc:HGNC:27475]	2.74468	0.910392	1.59208	2.2903	1.0763	1.08946
ENSG00000172336	POP7	POP7 homolog, ribonuclease P/MRP subunit [Source:HGNC Symbol;Acc:HGNC:19949]	1.44959	0.481414	1.59029	35.3852	18.0432	0.971693
ENSG00000085644	ZNF213	zinc finger protein 213 [Source:HGNC Symbol;Acc:HGNC:13005]	0.746678	0.248219	1.58887	9.79462	1.96656	2.31632
ENSG00000005175	RPAP3	RNA polymerase II associated protein 3 [Source:HGNC Symbol;Acc:HGNC:26151]	2.0762	0.690916	1.58736	10.7616	16.147	-0.58538
ENSG00000151689	INPP1	inositol polyphosphate-1-phosphatase [Source:HGNC Symbol;Acc:HGNC:6071]	1.96775	0.655061	1.58684	13.6367	5.41464	1.33256
ENSG00000102096	PIM2	Pim-2 proto-oncogene, serine/threonine kinase [Source:HGNC Symbol;Acc:HGNC:8987]	3.80593	1.26742	1.58636	4.82329	16.7648	-1.79734
ENSG00000156232	WHAMM	WAS protein homolog associated with actin, golgi membranes and microtubules [Source:HGNC Symbol;Acc:HGNC:30493]	1.76632	0.588332	1.58604	3.00502	5.39896	-0.845308
ENSG00000197119	SLC25A29	solute carrier family 25 (mitochondrial carnitine/acylcarnitine carrier), member 29 [Source:HGNC Symbol;Acc:HGNC:20116]	1.06699	0.355511	1.58557	24.297	9.7077	1.32358
ENSG00000117868	ESYT2	extended synaptotagmin-like protein 2 [Source:HGNC Symbol;Acc:HGNC:22211]	4.42068	1.47573	1.58284	7.73457	12.2592	-0.664472
ENSG00000170364	SETMAR	SET domain and mariner transposase fusion gene [Source:HGNC Symbol;Acc:HGNC:10762]	0.713268	0.238704	1.57922	8.19468	2.26022	1.85823
ENSG00000198168	SVIP	small VCP/p97-interacting protein [Source:HGNC Symbol;Acc:HGNC:25238]	1.7824	0.598044	1.57549	4.17208	9.21893	-1.14383
ENSG00000240694	PNMA2	paraneoplastic Ma antigen 2 [Source:HGNC Symbol;Acc:HGNC:9159]	0.995407	0.335445	1.56921	66.6759	17.0933	1.96373
ENSG00000120437	ACAT2	acetyl-CoA acetyltransferase 2 [Source:HGNC Symbol;Acc:HGNC:94]	2.57018	0.869677	1.56332	23.3882	88.8213	-1.92513
ENSG00000133818	RRAS2	related RAS viral (r-ras) oncogene homolog 2 [Source:HGNC Symbol;Acc:HGNC:17271]	1.77692	0.601448	1.56287	10.9032	36.826	-1.75598
ENSG00000183955	SETD8	SET domain containing (lysine methyltransferase) 8 [Source:HGNC Symbol;Acc:HGNC:29489]	2.53887	0.860218	1.56141	9.03048	21.6986	-1.26473
ENSG00000169826	CSGALNACT2	chondroitin sulfate N-acetylgalactosaminyltransferase 2 [Source:HGNC Symbol;Acc:HGNC:24292]	2.40678	0.815706	1.56098	11.0132	3.16336	1.7997
ENSG00000099617	EFNA2	ephrin-A2 [Source:HGNC Symbol;Acc:HGNC:3222]	1.66883	0.566424	1.55888	15.1258	9.97617	0.60045
ENSG00000122140	MRPS2	mitochondrial ribosomal protein S2 [Source:HGNC Symbol;Acc:HGNC:14495]	1.21466	0.413352	1.55511	23.788	11.1916	1.08781
ENSG00000198894	CIPC	CLOCK-interacting pacemaker [Source:HGNC Symbol;Acc:HGNC:20365]	1.51618	0.516507	1.55358	14.1416	15.369	-0.120079
ENSG00000167508	MVD	mevalonate (diphospho) decarboxylase [Source:HGNC Symbol;Acc:HGNC:7529]	1.98344	0.676418	1.55202	57.4907	77.9363	-0.438967
ENSG00000103005	USB1	U6 snRNA biogenesis 1 [Source:HGNC Symbol;Acc:HGNC:25792]	1.12079	0.383074	1.54882	17.4625	11.1578	0.646206
ENSG00000061337	LZTS1	leucine zipper, putative tumor suppressor 1 [Source:HGNC Symbol;Acc:HGNC:13861]	1.60232	0.548493	1.54661	9.67057	12.6053	-0.382358
ENSG00000116095	PLEKHA3	pleckstrin homology domain containing, family A (phosphoinositide binding specific) member 3 [Source:HGNC Symbol;Acc:HGNC:14338]	1.50982	0.517699	1.54419	1.78823	9.17955	-2.35989
ENSG00000139826	ABHD13	abhydrolase domain containing 13 [Source:HGNC Symbol;Acc:HGNC:20293]	1.88734	0.648035	1.54221	3.93844	10.9051	-1.4693
ENSG00000131459	GFPT2	glutamine-fructose-6-phosphate transaminase 2 [Source:HGNC Symbol;Acc:HGNC:4242]	2.59863	0.895689	1.53668	2.9069	5.6915	-0.96933
ENSG00000132334	PTPRE	protein tyrosine phosphatase, receptor type, E [Source:HGNC Symbol;Acc:HGNC:9669]	1.36357	0.470051	1.5365	4.61762	6.70892	-0.538929
ENSG00000182022	CHST15	carbohydrate (N-acetylgalactosamine 4-sulfate 6-O) sulfotransferase 15 [Source:HGNC Symbol;Acc:HGNC:18137]	1.17118	0.404378	1.53419	7.48637	8.5267	-0.18772
ENSG00000034152	MAP2K3	mitogen-activated protein kinase kinase 3 [Source:HGNC Symbol;Acc:HGNC:6843]	2.65397	0.916559	1.53385	7.57333	6.35372	0.253327
ENSG00000175592	FOSL1	FOS-like antigen 1 [Source:HGNC Symbol;Acc:HGNC:13718]	9.58141	3.31441	1.53148	0.442467	3.33544	-2.91424
ENSG00000109066	TMEM104	transmembrane protein 104 [Source:HGNC Symbol;Acc:HGNC:25984]	1.71927	0.596199	1.52793	4.47667	3.30825	0.436361
ENSG00000177054	ZDHHC13	zinc finger, DHHC-type containing 13 [Source:HGNC Symbol;Acc:HGNC:18413]	0.936439	0.325531	1.52439	4.96648	14.2358	-1.51922
ENSG00000042429	MED17	mediator complex subunit 17 [Source:HGNC Symbol;Acc:HGNC:2375]	1.32234	0.459875	1.52378	11.5073	7.59872	0.598723
ENSG00000169427	KCNK9	potassium channel, two pore domain subfamily K, member 9 [Source:HGNC Symbol;Acc:HGNC:6283]	2.41538	0.840366	1.52316	6.00043	19.4775	-1.69867
ENSG00000108559	NUP88	nucleoporin 88kDa [Source:HGNC Symbol;Acc:HGNC:8067]	1.85633	0.648207	1.51793	10.3996	22.0218	-1.0824
ENSG00000104267	CA2	carbonic anhydrase II [Source:HGNC Symbol;Acc:HGNC:1373]	4.59677	1.60528	1.51779	2.45833	6.98327	-1.50623
ENSG00000179820	MYADM	myeloid-associated differentiation marker [Source:HGNC Symbol;Acc:HGNC:7544]	1.81566	0.634877	1.51594	9.45205	17.5739	-0.894732
ENSG00000173166	RAPH1	Ras association (RalGDS/AF-6) and pleckstrin homology domains 1 [Source:HGNC Symbol;Acc:HGNC:14436]	2.08067	0.727546	1.51594	1.26627	12.8826	-3.34677
ENSG00000202566	MIR421	microRNA 421 [Source:HGNC Symbol;Acc:HGNC:32793]	0.757888	0.265147	1.51519	7.01157	3.22968	1.11834
ENSG00000069849	ATP1B3	ATPase, Na+/K+ transporting, beta 3 polypeptide [Source:HGNC Symbol;Acc:HGNC:806]	3.45917	1.2105	1.51482	73.4851	34.9856	1.07069
ENSG00000143590	EFNA3	ephrin-A3 [Source:HGNC Symbol;Acc:HGNC:3223]	2.05631	0.721915	1.51016	14.4617	34.2283	-1.24295
ENSG00000123607	TTC21B	tetratricopeptide repeat domain 21B [Source:HGNC Symbol;Acc:HGNC:25660]	1.13784	0.399779	1.50902	5.32936	3.23769	0.718998
ENSG00000167695	FAM57A	family with sequence similarity 57, member A [Source:HGNC Symbol;Acc:HGNC:29646]	0.988067	0.348277	1.50437	9.22723	3.92101	1.23467
ENSG00000167968	DNASE1L2	deoxyribonuclease I-like 2 [Source:HGNC Symbol;Acc:HGNC:2958]	1.00147	0.353457	1.50251	3.17139	2.97135	0.0939975
ENSG00000008513	ST3GAL1	ST3 beta-galactoside alpha-2,3-sialyltransferase 1 [Source:HGNC Symbol;Acc:HGNC:10862]	1.69842	0.60037	1.50027	2.91139	14.1652	-2.28258
ENSG00000142065	ZFP14	ZFP14 zinc finger protein [Source:HGNC Symbol;Acc:HGNC:29312]	0.700863	0.247774	1.50011	5.40738	3.71238	0.542585
ENSG00000196588	MKL1	megakaryoblastic leukemia (translocation) 1 [Source:HGNC Symbol;Acc:HGNC:14334]	2.15952	0.763499	1.50001	16.7546	14.3907	0.219418
ENSG00000197483	ZNF628	zinc finger protein 628 [Source:HGNC Symbol;Acc:HGNC:28054]	2.33152	0.824955	1.49888	2.74182	4.57312	-0.738048
ENSG00000022567	SLC45A4	solute carrier family 45, member 4 [Source:HGNC Symbol;Acc:HGNC:29196]	2.50837	0.887945	1.49821	2.77382	10.8715	-1.9706
ENSG00000181830	SLC35C1	solute carrier family 35 (GDP-fucose transporter), member C1 [Source:HGNC Symbol;Acc:HGNC:20197]	0.816749	0.289442	1.49662	9.32461	6.01884	0.631558
ENSG00000107443	CCNJ	cyclin J [Source:HGNC Symbol;Acc:HGNC:23434]	1.0254	0.363424	1.49646	8.00736	3.15376	1.34426
ENSG00000185818	NAT8L	N-acetyltransferase 8-like (GCN5-related, putative) [Source:HGNC Symbol;Acc:HGNC:26742]	1.24637	0.442302	1.49462	28.1699	20.9732	0.425605
ENSG00000165661	QSOX2	quiescin Q6 sulfhydryl oxidase 2 [Source:HGNC Symbol;Acc:HGNC:30249]	1.4074	0.499812	1.49358	8.63938	7.36311	0.230612
ENSG00000177453	NIM1K	NIM1 serine/threonine protein kinase [Source:HGNC Symbol;Acc:HGNC:28646]	1.38404	0.494515	1.4848	3.87425	2.89522	0.420245
ENSG00000210176	MT-TH	mitochondrially encoded tRNA histidine [Source:HGNC Symbol;Acc:HGNC:7487]	1.32589	0.473785	1.48465	29.5475	4.1621	2.82765
ENSG00000215251	FASTKD5	FAST kinase domains 5 [Source:HGNC Symbol;Acc:HGNC:25790]	1.91944	0.686586	1.48317	10.746	1.28219	3.06712
ENSG00000101109	STK4	serine/threonine kinase 4 [Source:HGNC Symbol;Acc:HGNC:11408]	1.57282	0.562711	1.48289	4.5229	10.8007	-1.2558
ENSG00000184675	AMER1	APC membrane recruitment protein 1 [Source:HGNC Symbol;Acc:HGNC:26837]	1.9572	0.701422	1.48043	4.33478	4.82528	-0.154655
ENSG00000196850	PPTC7	PTC7 protein phosphatase homolog [Source:HGNC Symbol;Acc:HGNC:30695]	1.99658	0.716212	1.47907	5.2602	6.78444	-0.367111
ENSG00000164169	PRMT9	protein arginine methyltransferase 9 [Source:HGNC Symbol;Acc:HGNC:25099]	2.36539	0.85193	1.47327	4.63871	5.88515	-0.343354
ENSG00000127824	TUBA4A	tubulin, alpha 4a [Source:HGNC Symbol;Acc:HGNC:12407]	2.02846	0.731432	1.47159	0.570347	50.2442	-6.46097
ENSG00000169032	MAP2K1	mitogen-activated protein kinase kinase 1 [Source:HGNC Symbol;Acc:HGNC:6840]	2.91026	1.05032	1.47032	18.0695	66.8706	-1.88782
ENSG00000126903	SLC10A3	solute carrier family 10, member 3 [Source:HGNC Symbol;Acc:HGNC:22979]	1.38984	0.501776	1.4698	3.96146	0.844884	2.22921
ENSG00000147679	UTP23	UTP23, small subunit (SSU) processome component, homolog (yeast) [Source:HGNC Symbol;Acc:HGNC:28224]	0.913484	0.330222	1.46794	5.43178	3.20104	0.762884
ENSG00000178171	AMER3	APC membrane recruitment protein 3 [Source:HGNC Symbol;Acc:HGNC:26771]	0.618795	0.224067	1.46553	7.13657	14.6365	-1.03627
ENSG00000169359	SLC33A1	solute carrier family 33 (acetyl-CoA transporter), member 1 [Source:HGNC Symbol;Acc:HGNC:95]	0.893769	0.324353	1.46234	2.7353	8.02907	-1.55353
ENSG00000122386	ZNF205	zinc finger protein 205 [Source:HGNC Symbol;Acc:HGNC:12996]	1.14702	0.417686	1.4574	11.911	10.4151	0.193614
ENSG00000106009	BRAT1	BRCA1-associated ATM activator 1 [Source:HGNC Symbol;Acc:HGNC:21701]	0.858027	0.31314	1.45422	13.1496	9.70549	0.438149
ENSG00000100311	PDGFB	platelet-derived growth factor beta polypeptide [Source:HGNC Symbol;Acc:HGNC:8800]	2.44046	0.891656	1.45259	2.01639	8.42979	-2.06372
ENSG00000040199	PHLPP2	PH domain and leucine rich repeat protein phosphatase 2 [Source:HGNC Symbol;Acc:HGNC:29149]	1.55935	0.571616	1.44783	4.55057	9.37581	-1.0429
ENSG00000181638	ZFP41	ZFP41 zinc finger protein [Source:HGNC Symbol;Acc:HGNC:26786]	0.817588	0.300056	1.44614	6.39331	7.45034	-0.220742
ENSG00000122687	FTSJ2	FtsJ RNA methyltransferase homolog 2 (E. coli) [Source:HGNC Symbol;Acc:HGNC:16352]	0.664446	0.24464	1.44149	12.4481	5.29619	1.23289
ENSG00000171150	SOCS5	suppressor of cytokine signaling 5 [Source:HGNC Symbol;Acc:HGNC:16852]	1.54499	0.569989	1.43859	9.30194	15.5083	-0.73744
ENSG00000112972	HMGCS1	3-hydroxy-3-methylglutaryl-CoA synthase 1 (soluble) [Source:HGNC Symbol;Acc:HGNC:5007]	3.8205	1.41105	1.43699	140.266	496.844	-1.82462
ENSG00000141956	PRDM15	PR domain containing 15 [Source:HGNC Symbol;Acc:HGNC:13999]	1.48234	0.549067	1.43282	2.25673	3.57922	-0.665408
ENSG00000221988	PPT2	palmitoyl-protein thioesterase 2 [Source:HGNC Symbol;Acc:HGNC:9326]	1.7985	0.666988	1.43106	6.29695	7.09063	-0.17126
ENSG00000181315	ZNF322	zinc finger protein 322 [Source:HGNC Symbol;Acc:HGNC:23640]	1.05562	0.391551	1.43081	2.56444	10.6645	-2.0561
ENSG00000171488	LRRC8C	leucine rich repeat containing 8 family, member C [Source:HGNC Symbol;Acc:HGNC:25075]	3.00058	1.11389	1.42963	1.06937	4.40618	-2.04277
ENSG00000198746	GPATCH3	G patch domain containing 3 [Source:HGNC Symbol;Acc:HGNC:25720]	1.2096	0.44942	1.42839	8.03694	2.74202	1.55141
ENSG00000171865	RNASEH1	ribonuclease H1 [Source:HGNC Symbol;Acc:HGNC:18466]	0.761493	0.283133	1.42735	10.1653	5.77105	0.816746
ENSG00000151617	EDNRA	endothelin receptor type A [Source:HGNC Symbol;Acc:HGNC:3179]	2.43249	0.905802	1.42517	0.923564	0.929427	-0.00912923
ENSG00000107554	DNMBP	dynamin binding protein [Source:HGNC Symbol;Acc:HGNC:30373]	2.32435	0.866293	1.4239	2.1451	1.56453	0.455313
ENSG00000114796	KLHL24	kelch-like family member 24 [Source:HGNC Symbol;Acc:HGNC:25947]	1.61169	0.60188	1.42102	7.71462	12.2901	-0.671826
ENSG00000160191	PDE9A	phosphodiesterase 9A [Source:HGNC Symbol;Acc:HGNC:8795]	1.44702	0.540787	1.41995	9.19936	9.06795	0.0207576
ENSG00000164949	GEM	GTP binding protein overexpressed in skeletal muscle [Source:HGNC Symbol;Acc:HGNC:4234]	24.8533	9.29726	1.41856	0.972675	2.92718	-1.58948
ENSG00000100784	RPS6KA5	ribosomal protein S6 kinase, 90kDa, polypeptide 5 [Source:HGNC Symbol;Acc:HGNC:10434]	1.86866	0.700152	1.41626	0.466826	7.2715	-3.9613
ENSG00000196581	AJAP1	adherens junctions associated protein 1 [Source:HGNC Symbol;Acc:HGNC:30801]	1.7418	0.654479	1.41216	6.32582	14.0815	-1.15447
ENSG00000171368	TPPP	tubulin polymerization promoting protein [Source:HGNC Symbol;Acc:HGNC:24164]	1.63913	0.616511	1.41073	14.5678	25.4267	-0.803555
ENSG00000160908	ZNF394	zinc finger protein 394 [Source:HGNC Symbol;Acc:HGNC:18832]	1.23201	0.463426	1.41061	4.04893	2.85092	0.506116
ENSG00000087448	KLHL42	kelch-like family member 42 [Source:HGNC Symbol;Acc:HGNC:29252]	0.988749	0.372042	1.41014	20.9361	3.59425	2.54223
ENSG00000105447	GRWD1	glutamate-rich WD repeat containing 1 [Source:HGNC Symbol;Acc:HGNC:21270]	1.32097	0.498206	1.40678	5.30344	13.4771	-1.34551
ENSG00000261609	GAN	gigaxonin [Source:HGNC Symbol;Acc:HGNC:4137]	1.82656	0.689204	1.40613	2.02287	3.13881	-0.633814
ENSG00000134758	RNF138	ring finger protein 138, E3 ubiquitin protein ligase [Source:HGNC Symbol;Acc:HGNC:17765]	1.71221	0.646349	1.40547	9.16602	8.44562	0.118092
ENSG00000234616	JRK	Jrk helix-turn-helix protein [Source:HGNC Symbol;Acc:HGNC:6199]	0.608345	0.230259	1.40163	5.68596	1.5167	1.90647
ENSG00000197147	LRRC8B	leucine rich repeat containing 8 family, member B [Source:HGNC Symbol;Acc:HGNC:30692]	2.16333	0.822778	1.39468	6.78286	41.9259	-2.62787
ENSG00000156427	FGF18	fibroblast growth factor 18 [Source:HGNC Symbol;Acc:HGNC:3674]	0.632685	0.240836	1.39344	0.829185	3.60357	-2.11966
ENSG00000101188	NTSR1	neurotensin receptor 1 (high affinity) [Source:HGNC Symbol;Acc:HGNC:8039]	1.45886	0.555647	1.3926	0.904559	14.7881	-4.03108
ENSG00000169902	TPST1	tyrosylprotein sulfotransferase 1 [Source:HGNC Symbol;Acc:HGNC:12020]	1.92699	0.734801	1.39092	17.9327	16.3083	0.136991
ENSG00000114450	GNB4	guanine nucleotide binding protein (G protein), beta polypeptide 4 [Source:HGNC Symbol;Acc:HGNC:20731]	2.05741	0.786017	1.38819	5.18732	20.6828	-1.99537
ENSG00000138031	ADCY3	adenylate cyclase 3 [Source:HGNC Symbol;Acc:HGNC:234]	1.36588	0.522141	1.38732	5.23811	8.4592	-0.691475
ENSG00000178233	TMEM151B	transmembrane protein 151B [Source:HGNC Symbol;Acc:HGNC:21315]	1.78823	0.684312	1.38581	37.0313	25.3224	0.548331
ENSG00000125772	GPCPD1	glycerophosphocholine phosphodiesterase 1 [Source:HGNC Symbol;Acc:HGNC:26957]	1.82851	0.700089	1.38506	4.12317	17.2337	-2.06341
ENSG00000154127	UBASH3B	ubiquitin associated and SH3 domain containing B [Source:HGNC Symbol;Acc:HGNC:29884]	2.41181	0.923635	1.38472	7.78987	8.04679	-0.0468131
ENSG00000134709	HOOK1	hook microtubule-tethering protein 1 [Source:HGNC Symbol;Acc:HGNC:19884]	1.37915	0.52888	1.38277	2.97735	12.2655	-2.0425
ENSG00000218891	ZNF579	zinc finger protein 579 [Source:HGNC Symbol;Acc:HGNC:26646]	1.32152	0.507208	1.38155	16.3836	15.6264	0.0682665
ENSG00000138617	PARP16	poly (ADP-ribose) polymerase family, member 16 [Source:HGNC Symbol;Acc:HGNC:26040]	0.598646	0.229796	1.38135	6.53904	1.64	1.99539
ENSG00000149295	DRD2	dopamine receptor D2 [Source:HGNC Symbol;Acc:HGNC:3023]	1.12081	0.430821	1.37939	3.10533	5.33475	-0.780675
ENSG00000047056	WDR37	WD repeat domain 37 [Source:HGNC Symbol;Acc:HGNC:31406]	1.8353	0.706421	1.37742	26.7324	18.1825	0.556038
ENSG00000185477	GPRIN3	GPRIN family member 3 [Source:HGNC Symbol;Acc:HGNC:27733]	1.23709	0.476662	1.37591	4.04728	2.65901	0.606065
ENSG00000010295	IFFO1	intermediate filament family orphan 1 [Source:HGNC Symbol;Acc:HGNC:24970]	1.49112	0.574923	1.37495	9.06861	6.84739	0.405326
ENSG00000006194	ZNF263	zinc finger protein 263 [Source:HGNC Symbol;Acc:HGNC:13056]	1.76549	0.680757	1.37485	13.7456	5.13311	1.42106
ENSG00000171451	DSEL	dermatan sulfate epimerase-like [Source:HGNC Symbol;Acc:HGNC:18144]	2.50684	0.96702	1.37425	2.01875	5.34493	-1.40471
ENSG00000183655	KLHL25	kelch-like family member 25 [Source:HGNC Symbol;Acc:HGNC:25732]	1.21486	0.468832	1.37365	11.609	11.6569	-0.0059451
ENSG00000114745	GORASP1	golgi reassembly stacking protein 1, 65kDa [Source:HGNC Symbol;Acc:HGNC:16769]	1.73314	0.668873	1.37359	16.5833	8.77109	0.918898
ENSG00000204386	NEU1	sialidase 1 (lysosomal sialidase) [Source:HGNC Symbol;Acc:HGNC:7758]	1.96031	0.757553	1.37166	6.77234	10.9927	-0.698822
ENSG00000103066	PLA2G15	phospholipase A2, group XV [Source:HGNC Symbol;Acc:HGNC:17163]	1.71532	0.663283	1.37078	11.5535	11.0302	0.066874
ENSG00000154370	TRIM11	tripartite motif containing 11 [Source:HGNC Symbol;Acc:HGNC:16281]	1.59084	0.615351	1.37031	4.14396	8.0832	-0.963917
ENSG00000253710	ALG11	ALG11, alpha-1,2-mannosyltransferase [Source:HGNC Symbol;Acc:HGNC:32456]	0.967597	0.374734	1.36854	2.24933	6.04032	-1.42513
ENSG00000148331	ASB6	ankyrin repeat and SOCS box containing 6 [Source:HGNC Symbol;Acc:HGNC:17181]	1.35115	0.524361	1.36556	11.9412	8.74775	0.448965
ENSG00000166478	ZNF143	zinc finger protein 143 [Source:HGNC Symbol;Acc:HGNC:12928]	2.13216	0.829179	1.36256	8.6608	3.58998	1.27052
ENSG00000125650	PSPN	persephin [Source:HGNC Symbol;Acc:HGNC:9579]	2.04656	0.799268	1.35645	1.45722	0.778518	0.904416
ENSG00000106351	AGFG2	ArfGAP with FG repeats 2 [Source:HGNC Symbol;Acc:HGNC:5177]	1.2904	0.504052	1.35617	2.04827	17.7621	-3.11632
ENSG00000078269	SYNJ2	synaptojanin 2 [Source:HGNC Symbol;Acc:HGNC:11504]	2.16054	0.844134	1.35585	0.797491	4.34627	-2.44624
ENSG00000197024	ZNF398	zinc finger protein 398 [Source:HGNC Symbol;Acc:HGNC:18373]	1.08697	0.425141	1.35429	7.34631	3.87126	0.924216
ENSG00000171813	PWWP2B	PWWP domain containing 2B [Source:HGNC Symbol;Acc:HGNC:25150]	3.2484	1.27085	1.35394	5.90604	1.1632	2.3441
ENSG00000099958	DERL3	derlin 3 [Source:HGNC Symbol;Acc:HGNC:14236]	2.3523	0.920405	1.35373	1.07761	0.811923	0.408414
ENSG00000206432	TMEM200C	transmembrane protein 200C [Source:HGNC Symbol;Acc:HGNC:37208]	1.45782	0.570648	1.35314	2.80504	8.69892	-1.63281
ENSG00000131871	VIMP	VCP-interacting membrane selenoprotein [Source:HGNC Symbol;Acc:HGNC:30396]	1.69448	0.66488	1.34968	13.2601	28.6396	-1.11092
ENSG00000101189	MRGBP	MRG/MORF4L binding protein [Source:HGNC Symbol;Acc:HGNC:15866]	0.987051	0.388471	1.34532	9.0059	8.93988	0.0106149
ENSG00000070961	ATP2B1	ATPase, Ca++ transporting, plasma membrane 1 [Source:HGNC Symbol;Acc:HGNC:814]	2.54808	1.00479	1.34252	21.8277	73.9462	-1.76032
ENSG00000135900	MRPL44	mitochondrial ribosomal protein L44 [Source:HGNC Symbol;Acc:HGNC:16650]	1.03433	0.407875	1.3425	21.001	11.2369	0.902221
ENSG00000259330	INAFM2	InaF-motif containing 2 [Source:HGNC Symbol;Acc:HGNC:35165]	1.01803	0.402509	1.33869	13.4438	12.3035	0.127872
ENSG00000173376	NDNF	neuron-derived neurotrophic factor [Source:HGNC Symbol;Acc:HGNC:26256]	1.23835	0.490694	1.33552	3.60887	3.1198	0.210094
ENSG00000198315	ZKSCAN8	zinc finger with KRAB and SCAN domains 8 [Source:HGNC Symbol;Acc:HGNC:12983]	1.11347	0.441435	1.33479	11.1488	1.85302	2.58894
ENSG00000213638	ADAT3	adenosine deaminase, tRNA-specific 3 [Source:HGNC Symbol;Acc:HGNC:25151]	1.76825	0.701595	1.33362	2.37382	1.20882	0.973606
ENSG00000135631	RAB11FIP5	RAB11 family interacting protein 5 (class I) [Source:HGNC Symbol;Acc:HGNC:24845]	2.49646	0.993581	1.32918	5.89934	17.4623	-1.56562
ENSG00000079459	FDFT1	farnesyl-diphosphate farnesyltransferase 1 [Source:HGNC Symbol;Acc:HGNC:3629]	2.50755	0.998596	1.3283	67.4559	84.6637	-0.327799
ENSG00000134109	EDEM1	ER degradation enhancer, mannosidase alpha-like 1 [Source:HGNC Symbol;Acc:HGNC:18967]	1.42098	0.566634	1.3264	3.97621	8.17951	-1.04062
ENSG00000113456	RAD1	RAD1 checkpoint DNA exonuclease [Source:HGNC Symbol;Acc:HGNC:9806]	1.21435	0.484668	1.32512	8.175	1.94653	2.07031
ENSG00000159256	MORC3	MORC family CW-type zinc finger 3 [Source:HGNC Symbol;Acc:HGNC:23572]	1.2515	0.499576	1.32488	10.5088	9.14564	0.200448
ENSG00000129355	CDKN2D	cyclin-dependent kinase inhibitor 2D (p19, inhibits CDK4) [Source:HGNC Symbol;Acc:HGNC:1790]	1.69587	0.677984	1.3227	70.7565	58.9127	0.264284
ENSG00000108064	TFAM	transcription factor A, mitochondrial [Source:HGNC Symbol;Acc:HGNC:11741]	1.09072	0.436386	1.3216	11.7457	8.55909	0.456607
ENSG00000108557	RAI1	retinoic acid induced 1 [Source:HGNC Symbol;Acc:HGNC:9834]	1.46914	0.588346	1.32024	15.9557	15.3228	0.0583913
ENSG00000133687	TMTC1	transmembrane and tetratricopeptide repeat containing 1 [Source:HGNC Symbol;Acc:HGNC:24099]	1.53692	0.615512	1.32018	2.98027	7.5498	-1.341
ENSG00000178951	ZBTB7A	zinc finger and BTB domain containing 7A [Source:HGNC Symbol;Acc:HGNC:18078]	1.22612	0.491136	1.31991	3.40517	6.65047	-0.965727
ENSG00000162992	NEUROD1	neuronal differentiation 1 [Source:HGNC Symbol;Acc:HGNC:7762]	0.740259	0.296983	1.31765	5.71515	11.5938	-1.0205
ENSG00000052749	RRP12	ribosomal RNA processing 12 homolog [Source:HGNC Symbol;Acc:HGNC:29100]	1.54141	0.619874	1.3142	8.84093	11.4402	-0.371846
ENSG00000152944	MED21	mediator complex subunit 21 [Source:HGNC Symbol;Acc:HGNC:11473]	2.13615	0.859464	1.3135	18.8504	9.04744	1.05902
ENSG00000142279	WTIP	Wilms tumor 1 interacting protein [Source:HGNC Symbol;Acc:HGNC:20964]	1.4482	0.583911	1.31044	1.5457	7.06368	-2.19216
ENSG00000119630	PGF	placental growth factor [Source:HGNC Symbol;Acc:HGNC:8893]	0.886833	0.358127	1.30819	0.698396	0.774879	-0.149925
ENSG00000148154	UGCG	UDP-glucose ceramide glucosyltransferase [Source:HGNC Symbol;Acc:HGNC:12524]	1.83046	0.739644	1.3073	13.3925	31.1284	-1.21681
ENSG00000157538	DSCR3	Down syndrome critical region 3 [Source:HGNC Symbol;Acc:HGNC:3044]	1.43043	0.578584	1.30585	8.43343	16.8655	-0.999886
ENSG00000130479	MAP1S	microtubule-associated protein 1S [Source:HGNC Symbol;Acc:HGNC:15715]	1.73645	0.702952	1.30464	23.2152	19.4505	0.255258
ENSG00000165724	ZMYND19	zinc finger, MYND-type containing 19 [Source:HGNC Symbol;Acc:HGNC:21146]	1.72397	0.698151	1.30412	32.836	16.2394	1.01578
ENSG00000122012	SV2C	synaptic vesicle glycoprotein 2C [Source:HGNC Symbol;Acc:HGNC:30670]	4.00274	1.62309	1.30224	4.42556	6.39258	-0.530539
ENSG00000143842	SOX13	SRY (sex determining region Y)-box 13 [Source:HGNC Symbol;Acc:HGNC:11192]	0.786224	0.318981	1.30147	7.57435	1.26115	2.58639
ENSG00000115641	FHL2	four and a half LIM domains 2 [Source:HGNC Symbol;Acc:HGNC:3703]	2.7697	1.12457	1.30036	0.817558	6.69273	-3.0332
ENSG00000138622	HCN4	hyperpolarization activated cyclic nucleotide gated potassium channel 4 [Source:HGNC Symbol;Acc:HGNC:16882]	1.22921	0.500047	1.2976	8.25188	11.0286	-0.41845
ENSG00000177374	HIC1	hypermethylated in cancer 1 [Source:HGNC Symbol;Acc:HGNC:4909]	4.38006	1.7821	1.29738	0.461052	0.519848	-0.173162
ENSG00000183114	FAM43B	family with sequence similarity 43, member B [Source:HGNC Symbol;Acc:HGNC:31791]	0.693827	0.282395	1.29686	5.82493	11.2137	-0.944948
ENSG00000008853	RHOBTB2	Rho-related BTB domain containing 2 [Source:HGNC Symbol;Acc:HGNC:18756]	1.43188	0.583298	1.2956	17.3522	16.7124	0.0542037
ENSG00000106635	BCL7B	B-cell CLL/lymphoma 7B [Source:HGNC Symbol;Acc:HGNC:1005]	1.27373	0.519603	1.29358	15.0187	10.6101	0.501325
ENSG00000196352	CD55	CD55 molecule, decay accelerating factor for complement (Cromer blood group) [Source:HGNC Symbol;Acc:HGNC:2665]	2.6271	1.07331	1.2914	1.01537	1.21434	-0.258171
ENSG00000134508	CABLES1	Cdk5 and Abl enzyme substrate 1 [Source:HGNC Symbol;Acc:HGNC:25097]	1.11191	0.454472	1.29078	1.784	4.63883	-1.37865
ENSG00000072401	UBE2D1	ubiquitin-conjugating enzyme E2D 1 [Source:HGNC Symbol;Acc:HGNC:12474]	1.55042	0.633736	1.2907	23.3487	38.4057	-0.717978
ENSG00000160233	LRRC3	leucine rich repeat containing 3 [Source:HGNC Symbol;Acc:HGNC:14965]	1.32295	0.540998	1.29007	6.02607	12.8903	-1.097
ENSG00000134531	EMP1	epithelial membrane protein 1 [Source:HGNC Symbol;Acc:HGNC:3333]	10.3801	4.2454	1.28984	0.70074	3.3795	-2.26986
ENSG00000103018	CYB5B	cytochrome b5 type B (outer mitochondrial membrane) [Source:HGNC Symbol;Acc:HGNC:24374]	2.1008	0.859447	1.28946	17.5972	48.2728	-1.45586
ENSG00000100426	ZBED4	zinc finger, BED-type containing 4 [Source:HGNC Symbol;Acc:HGNC:20721]	0.980378	0.401258	1.28881	7.96334	1.38563	2.52283
ENSG00000176619	LMNB2	lamin B2 [Source:HGNC Symbol;Acc:HGNC:6638]	1.79084	0.733395	1.28798	23.1258	11.0018	1.07177
ENSG00000170619	COMMD5	COMM domain containing 5 [Source:HGNC Symbol;Acc:HGNC:17902]	0.96796	0.397521	1.28392	16.64	12.727	0.386766
ENSG00000135048	TMEM2	transmembrane protein 2 [Source:HGNC Symbol;Acc:HGNC:11869]	2.53953	1.04312	1.28365	5.80616	5.79986	0.0015655
ENSG00000180667	YOD1	YOD1 deubiquitinase [Source:HGNC Symbol;Acc:HGNC:25035]	1.83511	0.754212	1.28283	3.57095	1.8064	0.983192
ENSG00000182827	ACBD3	acyl-CoA binding domain containing 3 [Source:HGNC Symbol;Acc:HGNC:15453]	1.33539	0.549217	1.28181	18.1356	14.5555	0.317256
ENSG00000188167	TMPPE	transmembrane protein with metallophosphoesterase domain [Source:HGNC Symbol;Acc:HGNC:33865]	1.24435	0.512234	1.28052	0.503303	2.02522	-2.00858
ENSG00000177839	PCDHB9	protocadherin beta 9 [Source:HGNC Symbol;Acc:HGNC:8694]	1.76609	0.727691	1.27916	2.33858	2.15097	0.120644
ENSG00000164933	SLC25A32	solute carrier family 25 (mitochondrial folate carrier), member 32 [Source:HGNC Symbol;Acc:HGNC:29683]	1.49074	0.615084	1.27717	7.5683	2.9724	1.34834
ENSG00000185989	RASA3	RAS p21 protein activator 3 [Source:HGNC Symbol;Acc:HGNC:20331]	1.12077	0.462492	1.27699	13.9622	13.5317	0.0451876
ENSG00000070444	MNT	MAX network transcriptional repressor [Source:HGNC Symbol;Acc:HGNC:7188]	2.00474	0.827674	1.27628	12.2	17.4768	-0.518566
ENSG00000126261	UBA2	ubiquitin-like modifier activating enzyme 2 [Source:HGNC Symbol;Acc:HGNC:30661]	1.72725	0.713962	1.27456	28.6515	35.584	-0.31262
ENSG00000153487	ING1	inhibitor of growth family, member 1 [Source:HGNC Symbol;Acc:HGNC:6062]	2.18026	0.902017	1.27327	5.67941	22.4217	-1.98108
ENSG00000126003	PLAGL2	pleiomorphic adenoma gene-like 2 [Source:HGNC Symbol;Acc:HGNC:9047]	1.51848	0.628315	1.27307	7.81396	1.44596	2.43403
ENSG00000104140	RHOV	ras homolog family member V [Source:HGNC Symbol;Acc:HGNC:18313]	0.955483	0.395943	1.27094	5.11359	12.1814	-1.25227
ENSG00000183624	HMCES	5-hydroxymethylcytosine (hmC) binding, ES cell-specific [Source:HGNC Symbol;Acc:HGNC:24446]	2.04605	0.849485	1.26818	12.7428	10.1372	0.330016
ENSG00000011105	TSPAN9	tetraspanin 9 [Source:HGNC Symbol;Acc:HGNC:21640]	2.17707	0.90392	1.26812	9.31022	17.8297	-0.937393
ENSG00000169926	KLF13	Kruppel-like factor 13 [Source:HGNC Symbol;Acc:HGNC:13672]	1.72347	0.716326	1.26663	7.49693	23.0748	-1.62194
ENSG00000168395	ING5	inhibitor of growth family, member 5 [Source:HGNC Symbol;Acc:HGNC:19421]	1.0926	0.454931	1.26404	7.0014	2.52011	1.47416
ENSG00000083799	CYLD	cylindromatosis (turban tumor syndrome) [Source:HGNC Symbol;Acc:HGNC:2584]	1.73668	0.723644	1.26298	9.43683	6.24873	0.594741
ENSG00000168061	SAC3D1	SAC3 domain containing 1 [Source:HGNC Symbol;Acc:HGNC:30179]	1.15624	0.482917	1.25959	11.3565	19.0399	-0.745515
ENSG00000116525	TRIM62	tripartite motif containing 62 [Source:HGNC Symbol;Acc:HGNC:25574]	1.19477	0.499601	1.25788	8.81931	15.7827	-0.839608
ENSG00000177427	MIEF2	mitochondrial elongation factor 2 [Source:HGNC Symbol;Acc:HGNC:17920]	0.986669	0.412774	1.25721	10.5417	9.80378	0.104701
ENSG00000122966	CIT	citron rho-interacting serine/threonine kinase [Source:HGNC Symbol;Acc:HGNC:1985]	1.43597	0.600918	1.25679	5.03635	5.82679	-0.210325
ENSG00000069998	CECR5	cat eye syndrome chromosome region, candidate 5 [Source:HGNC Symbol;Acc:HGNC:1843]	1.23987	0.518913	1.25663	15.2498	8.70589	0.808724
ENSG00000132801	ZSWIM3	zinc finger, SWIM-type containing 3 [Source:HGNC Symbol;Acc:HGNC:16157]	0.495344	0.207703	1.25391	4.32963	4.16093	0.0573362
ENSG00000008283	CYB561	cytochrome b561 [Source:HGNC Symbol;Acc:HGNC:2571]	1.62314	0.68077	1.25355	18.7406	15.2153	0.300642
ENSG00000103540	CCP110	centriolar coiled coil protein 110kDa [Source:HGNC Symbol;Acc:HGNC:24342]	1.38066	0.579299	1.25298	14.3583	7.10512	1.01496
ENSG00000103264	FBXO31	F-box protein 31 [Source:HGNC Symbol;Acc:HGNC:16510]	1.64117	0.689034	1.25208	8.71785	32.0652	-1.87896
ENSG00000101745	ANKRD12	ankyrin repeat domain 12 [Source:HGNC Symbol;Acc:HGNC:29135]	1.55163	0.653274	1.24803	11.5928	12.1316	-0.0655476
ENSG00000170500	LONRF2	LON peptidase N-terminal domain and ring finger 2 [Source:HGNC Symbol;Acc:HGNC:24788]	1.57496	0.663127	1.24796	18.9267	32.6131	-0.785033
ENSG00000187486	KCNJ11	potassium channel, inwardly rectifying subfamily J, member 11 [Source:HGNC Symbol;Acc:HGNC:6257]	1.03213	0.435142	1.24607	2.61823	5.51876	-1.07575
ENSG00000099804	CDC34	cell division cycle 34 [Source:HGNC Symbol;Acc:HGNC:1734]	1.93416	0.815899	1.24525	42.7968	28.2746	0.597999
ENSG00000168275	COA6	cytochrome c oxidase assembly factor 6 [Source:HGNC Symbol;Acc:HGNC:18025]	1.60086	0.675333	1.24517	11.8239	14.7436	-0.318388
ENSG00000139496	NUPL1	nucleoporin like 1 [Source:HGNC Symbol;Acc:HGNC:20261]	1.95253	0.824269	1.24416	13.8593	28.083	-1.01884
ENSG00000220008	LINGO3	leucine rich repeat and Ig domain containing 3 [Source:HGNC Symbol;Acc:HGNC:21206]	0.935099	0.39492	1.24356	1.23323	7.76882	-2.65525
ENSG00000153113	CAST	calpastatin [Source:HGNC Symbol;Acc:HGNC:1515]	4.23281	1.78866	1.24274	6.15016	0.587442	3.38811
ENSG00000081189	MEF2C	myocyte enhancer factor 2C [Source:HGNC Symbol;Acc:HGNC:6996]	2.88961	1.22157	1.24213	3.40799	194.158	-5.83217
ENSG00000108179	PPIF	peptidylprolyl isomerase F [Source:HGNC Symbol;Acc:HGNC:9259]	1.72925	0.731235	1.24174	13.1126	7.56052	0.794394
ENSG00000262919	FAM58A	family with sequence similarity 58, member A [Source:HGNC Symbol;Acc:HGNC:28434]	1.23989	0.524955	1.23995	15.4314	8.75624	0.817484
ENSG00000008256	CYTH3	cytohesin 3 [Source:HGNC Symbol;Acc:HGNC:9504]	1.54994	0.656301	1.23978	10.7148	21.0282	-0.972722
ENSG00000168490	PHYHIP	phytanoyl-CoA 2-hydroxylase interacting protein [Source:HGNC Symbol;Acc:HGNC:16865]	1.77453	0.751753	1.23911	9.55583	37.8735	-1.98674
ENSG00000136856	SLC2A8	solute carrier family 2 (facilitated glucose transporter), member 8 [Source:HGNC Symbol;Acc:HGNC:13812]	1.26157	0.534889	1.2379	10.0088	6.10677	0.712781
ENSG00000155275	TRMT44	tRNA methyltransferase 44 homolog (S. cerevisiae) [Source:HGNC Symbol;Acc:HGNC:26653]	1.41971	0.602427	1.23674	3.9619	2.50721	0.660108
ENSG00000131409	LRRC4B	leucine rich repeat containing 4B [Source:HGNC Symbol;Acc:HGNC:25042]	1.15862	0.491743	1.23644	89.7018	98.8443	-0.14002
ENSG00000023909	GCLM	glutamate-cysteine ligase, modifier subunit [Source:HGNC Symbol;Acc:HGNC:4312]	1.78059	0.75652	1.2349	3.39579	10.4872	-1.62682
ENSG00000114956	DGUOK	deoxyguanosine kinase [Source:HGNC Symbol;Acc:HGNC:2858]	1.02127	0.433978	1.23467	62.6267	6.64786	3.23581
ENSG00000143494	VASH2	vasohibin 2 [Source:HGNC Symbol;Acc:HGNC:25723]	1.24785	0.530514	1.23398	20.0063	16.0981	0.313569
ENSG00000244274	DBNDD2	dysbindin (dystrobrevin binding protein 1) domain containing 2 [Source:HGNC Symbol;Acc:HGNC:15881]	1.4909	0.634246	1.23307	1.38502	6.82993	-2.30197
ENSG00000186352	ANKRD37	ankyrin repeat domain 37 [Source:HGNC Symbol;Acc:HGNC:29593]	1.20539	0.513316	1.23158	3.77536	6.93304	-0.876873
ENSG00000132975	GPR12	G protein-coupled receptor 12 [Source:HGNC Symbol;Acc:HGNC:4466]	0.800579	0.34096	1.23144	7.2316	18.5347	-1.35784
ENSG00000148572	NRBF2	nuclear receptor binding factor 2 [Source:HGNC Symbol;Acc:HGNC:19692]	1.32436	0.564786	1.22952	10.197	5.02918	1.01974
ENSG00000141542	RAB40B	RAB40B, member RAS oncogene family [Source:HGNC Symbol;Acc:HGNC:18284]	1.23331	0.527601	1.22502	7.20462	16.1513	-1.16465
ENSG00000140950	TLDC1	TBC/LysM-associated domain containing 1 [Source:HGNC Symbol;Acc:HGNC:29325]	0.989948	0.4235	1.22499	3.64867	5.96959	-0.710262
ENSG00000110108	TMEM109	transmembrane protein 109 [Source:HGNC Symbol;Acc:HGNC:28771]	1.09894	0.470906	1.22261	5.10837	15.2659	-1.57938
ENSG00000163376	KBTBD8	kelch repeat and BTB (POZ) domain containing 8 [Source:HGNC Symbol;Acc:HGNC:30691]	0.54501	0.23357	1.22243	2.0491	1.26647	0.694172
ENSG00000120137	PANK3	pantothenate kinase 3 [Source:HGNC Symbol;Acc:HGNC:19365]	1.95457	0.837834	1.22212	24.4242	22.0966	0.14449
ENSG00000204315	FKBPL	FK506 binding protein like [Source:HGNC Symbol;Acc:HGNC:13949]	1.22229	0.523943	1.2221	4.55795	4.84383	-0.0877617
ENSG00000112130	RNF8	ring finger protein 8, E3 ubiquitin protein ligase [Source:HGNC Symbol;Acc:HGNC:10071]	1.36297	0.58456	1.22134	6.32108	3.25349	0.958185
ENSG00000135974	C2orf49	chromosome 2 open reading frame 49 [Source:HGNC Symbol;Acc:HGNC:28772]	1.43868	0.617548	1.22012	9.34606	11.8945	-0.347861
ENSG00000167680	SEMA6B	sema domain, transmembrane domain (TM), and cytoplasmic domain, (semaphorin) 6B [Source:HGNC Symbol;Acc:HGNC:10739]	1.59136	0.684181	1.21781	31.4457	39.2654	-0.320395
ENSG00000100281	HMGXB4	HMG box domain containing 4 [Source:HGNC Symbol;Acc:HGNC:5003]	0.822548	0.354269	1.21525	10.2896	5.69549	0.853302
ENSG00000164244	PRRC1	proline-rich coiled-coil 1 [Source:HGNC Symbol;Acc:HGNC:28164]	1.34291	0.578746	1.21436	9.59393	9.08364	0.078852
ENSG00000146856	AGBL3	ATP/GTP binding protein-like 3 [Source:HGNC Symbol;Acc:HGNC:27981]	1.57678	0.679918	1.21355	1.45768	2.21973	-0.606709
ENSG00000156097	GPR61	G protein-coupled receptor 61 [Source:HGNC Symbol;Acc:HGNC:13300]	0.667408	0.287816	1.21342	3.13771	5.89004	-0.908566
ENSG00000090470	PDCD7	programmed cell death 7 [Source:HGNC Symbol;Acc:HGNC:8767]	0.870635	0.375613	1.21282	9.95182	8.96109	0.151287
ENSG00000169710	FASN	fatty acid synthase [Source:HGNC Symbol;Acc:HGNC:3594]	2.07984	0.89771	1.21215	59.1803	69.0345	-0.222201
ENSG00000088205	DDX18	DEAD (Asp-Glu-Ala-Asp) box polypeptide 18 [Source:HGNC Symbol;Acc:HGNC:2741]	1.16774	0.504048	1.21209	14.736	6.87951	1.09897
ENSG00000103121	CMC2	C-x(9)-C motif containing 2 [Source:HGNC Symbol;Acc:HGNC:24447]	2.20425	0.952098	1.21111	3.07571	3.02197	0.0254326
ENSG00000124225	PMEPA1	prostate transmembrane protein, androgen induced 1 [Source:HGNC Symbol;Acc:HGNC:14107]	4.90643	2.12056	1.21023	6.26109	11.4489	-0.870717
ENSG00000136940	PDCL	phosducin-like [Source:HGNC Symbol;Acc:HGNC:8770]	1.25855	0.543952	1.21022	12.3076	11.219	0.133611
ENSG00000197063	MAFG	v-maf avian musculoaponeurotic fibrosarcoma oncogene homolog G [Source:HGNC Symbol;Acc:HGNC:6781]	2.43027	1.05046	1.2101	14.913	25.3832	-0.767302
ENSG00000110921	MVK	mevalonate kinase [Source:HGNC Symbol;Acc:HGNC:7530]	2.13996	0.925189	1.20976	8.84323	41.9683	-2.24666
ENSG00000131873	CHSY1	chondroitin sulfate synthase 1 [Source:HGNC Symbol;Acc:HGNC:17198]	2.12409	0.919588	1.20778	9.68956	2.75049	1.81674
ENSG00000176915	ANKLE2	ankyrin repeat and LEM domain containing 2 [Source:HGNC Symbol;Acc:HGNC:29101]	1.44175	0.624556	1.20692	8.55742	5.83557	0.552301
ENSG00000184986	TMEM121	transmembrane protein 121 [Source:HGNC Symbol;Acc:HGNC:20511]	1.03814	0.449885	1.20637	10.7547	20.6381	-0.940342
ENSG00000115421	PAPOLG	poly(A) polymerase gamma [Source:HGNC Symbol;Acc:HGNC:14982]	0.828251	0.358959	1.20625	5.98144	7.22319	-0.272143
ENSG00000198912	C1orf174	chromosome 1 open reading frame 174 [Source:HGNC Symbol;Acc:HGNC:27915]	1.01924	0.441766	1.20615	6.56446	9.70323	-0.563788
ENSG00000136274	NACAD	NAC alpha domain containing [Source:HGNC Symbol;Acc:HGNC:22196]	0.845978	0.367036	1.2047	27.3869	18.8026	0.542555
ENSG00000176903	PNMA1	paraneoplastic Ma antigen 1 [Source:HGNC Symbol;Acc:HGNC:9158]	1.34277	0.582869	1.20397	120.089	3.21265	5.2242
ENSG00000111641	NOP2	NOP2 nucleolar protein [Source:HGNC Symbol;Acc:HGNC:7867]	1.26392	0.548844	1.20343	12.9398	18.8577	-0.543341
ENSG00000169991	IFFO2	intermediate filament family orphan 2 [Source:HGNC Symbol;Acc:HGNC:27006]	1.52112	0.660584	1.20332	5.77573	6.37347	-0.142077
ENSG00000132740	IGHMBP2	immunoglobulin mu binding protein 2 [Source:HGNC Symbol;Acc:HGNC:5542]	1.13664	0.494469	1.20082	8.02387	3.39287	1.24179
ENSG00000003989	SLC7A2	solute carrier family 7 (cationic amino acid transporter, y+ system), member 2 [Source:HGNC Symbol;Acc:HGNC:11060]	1.7428	0.758707	1.19979	0.602613	2.42738	-2.0101
ENSG00000187531	SIRT7	sirtuin 7 [Source:HGNC Symbol;Acc:HGNC:14935]	1.3693	0.596836	1.19803	6.03225	11.4657	-0.926557
ENSG00000077458	FAM76B	family with sequence similarity 76, member B [Source:HGNC Symbol;Acc:HGNC:28492]	1.29035	0.562482	1.19788	10.8165	8.01868	0.431796
ENSG00000172458	IL17D	interleukin 17D [Source:HGNC Symbol;Acc:HGNC:5984]	1.147	0.500313	1.19696	5.54541	15.0927	-1.44448
ENSG00000115762	PLEKHB2	pleckstrin homology domain containing, family B (evectins) member 2 [Source:HGNC Symbol;Acc:HGNC:19236]	1.89727	0.828136	1.19599	50.5064	50.6537	-0.00419984
ENSG00000121058	COIL	coilin [Source:HGNC Symbol;Acc:HGNC:2184]	0.954168	0.416488	1.19597	14.2752	7.06875	1.01398
ENSG00000176595	KBTBD11	kelch repeat and BTB (POZ) domain containing 11 [Source:HGNC Symbol;Acc:HGNC:29104]	1.19714	0.522729	1.19545	19.3953	7.79649	1.31481
ENSG00000166446	CDYL2	chromodomain protein, Y-like 2 [Source:HGNC Symbol;Acc:HGNC:23030]	1.32369	0.57799	1.19544	2.54938	2.34886	0.118182
ENSG00000178974	FBXO34	F-box protein 34 [Source:HGNC Symbol;Acc:HGNC:20201]	2.15612	0.943225	1.19276	12.2606	10.3203	0.248552
ENSG00000133069	TMCC2	transmembrane and coiled-coil domain family 2 [Source:HGNC Symbol;Acc:HGNC:24239]	2.07238	0.906725	1.19255	21.7873	51.4268	-1.23903
ENSG00000111450	STX2	syntaxin 2 [Source:HGNC Symbol;Acc:HGNC:3403]	1.67156	0.731429	1.1924	11.9719	8.98903	0.413415
ENSG00000261221	ZNF865	zinc finger protein 865 [Source:HGNC Symbol;Acc:HGNC:38705]	1.31189	0.574091	1.19229	10.2135	8.47613	0.268999
ENSG00000157927	RADIL	Ras association and DIL domains [Source:HGNC Symbol;Acc:HGNC:22226]	0.901518	0.395586	1.18837	4.40153	6.04909	-0.458715
ENSG00000168286	THAP11	THAP domain containing 11 [Source:HGNC Symbol;Acc:HGNC:23194]	0.946445	0.41568	1.18705	15.6448	18.4263	-0.236077
ENSG00000122696	SLC25A51	solute carrier family 25, member 51 [Source:HGNC Symbol;Acc:HGNC:23323]	1.87146	0.822237	1.18654	6.02352	23.2246	-1.94697
ENSG00000110172	CHORDC1	cysteine and histidine-rich domain (CHORD) containing 1 [Source:HGNC Symbol;Acc:HGNC:14525]	1.83284	0.805888	1.18542	9.00458	23.5507	-1.38704
ENSG00000104549	SQLE	squalene epoxidase [Source:HGNC Symbol;Acc:HGNC:11279]	3.14327	1.38306	1.1844	60.9406	96.3921	-0.661512
ENSG00000234912	SNHG20	small nucleolar RNA host gene 20 [Source:HGNC Symbol;Acc:HGNC:33099]	1.3271	0.584361	1.18335	4.62426	5.99417	-0.374337
ENSG00000066248	NGEF	neuronal guanine nucleotide exchange factor [Source:HGNC Symbol;Acc:HGNC:7807]	1.73438	0.764129	1.18253	4.3272	61.4985	-3.82904
ENSG00000156735	BAG4	BCL2-associated athanogene 4 [Source:HGNC Symbol;Acc:HGNC:940]	1.12812	0.497212	1.18198	7.41896	7.85523	-0.0824369
ENSG00000099992	TBC1D10A	TBC1 domain family, member 10A [Source:HGNC Symbol;Acc:HGNC:23609]	1.36647	0.602759	1.1808	2.32355	14.9637	-2.68706
ENSG00000137309	HMGA1	high mobility group AT-hook 1 [Source:HGNC Symbol;Acc:HGNC:5010]	2.38481	1.05421	1.17771	62.034	11.5817	2.42122
ENSG00000177981	ASB8	ankyrin repeat and SOCS box containing 8 [Source:HGNC Symbol;Acc:HGNC:17183]	0.817353	0.361458	1.17713	21.6891	14.5686	0.574109
ENSG00000166848	TERF2IP	telomeric repeat binding factor 2, interacting protein [Source:HGNC Symbol;Acc:HGNC:19246]	1.43003	0.632592	1.1767	167.212	19.1287	3.12787
ENSG00000223802	CERS1	ceramide synthase 1 [Source:HGNC Symbol;Acc:HGNC:14253]	1.78479	0.790046	1.17575	5.19077	20.3041	-1.96775
ENSG00000125779	PANK2	pantothenate kinase 2 [Source:HGNC Symbol;Acc:HGNC:15894]	1.41687	0.627292	1.1755	7.6268	10.0367	-0.396133
ENSG00000164484	TMEM200A	transmembrane protein 200A [Source:HGNC Symbol;Acc:HGNC:21075]	1.7665	0.782125	1.17543	6.1518	7.35468	-0.257652
ENSG00000198855	FICD	FIC domain containing [Source:HGNC Symbol;Acc:HGNC:18416]	0.564828	0.250112	1.17524	1.98134	3.19318	-0.688515
ENSG00000158445	KCNB1	potassium channel, voltage gated Shab related subfamily B, member 1 [Source:HGNC Symbol;Acc:HGNC:6231]	1.63558	0.724768	1.17421	3.39839	9.9447	-1.54908
ENSG00000176058	TPRN	taperin [Source:HGNC Symbol;Acc:HGNC:26894]	1.21833	0.540172	1.17341	8.56377	3.94103	1.11967
ENSG00000166170	BAG5	BCL2-associated athanogene 5 [Source:HGNC Symbol;Acc:HGNC:941]	1.37817	0.611204	1.17302	12.8206	18.5518	-0.533096
ENSG00000187650	VMAC	vimentin-type intermediate filament associated coiled-coil protein [Source:HGNC Symbol;Acc:HGNC:33803]	0.853951	0.378824	1.17262	1.93428	4.37572	-1.17773
ENSG00000146072	TNFRSF21	tumor necrosis factor receptor superfamily, member 21 [Source:HGNC Symbol;Acc:HGNC:13469]	1.15196	0.511305	1.17184	24.5164	23.9095	0.0361575
ENSG00000224470	ATXN1L	ataxin 1-like [Source:HGNC Symbol;Acc:HGNC:33279]	2.04278	0.908777	1.16854	4.56617	6.2837	-0.460631
ENSG00000103168	TAF1C	TATA box binding protein (TBP)-associated factor, RNA polymerase I, C, 110kDa [Source:HGNC Symbol;Acc:HGNC:11534]	0.84934	0.377898	1.16834	22.4184	5.30329	2.07973
ENSG00000160539	PPAPDC3	phosphatidic acid phosphatase type 2 domain containing 3 [Source:HGNC Symbol;Acc:HGNC:28174]	1.14724	0.510518	1.16814	6.47193	10.9873	-0.763573
ENSG00000065989	PDE4A	phosphodiesterase 4A, cAMP-specific [Source:HGNC Symbol;Acc:HGNC:8780]	1.67213	0.744527	1.16729	7.93787	16.2418	-1.03289
ENSG00000075426	FOSL2	FOS-like antigen 2 [Source:HGNC Symbol;Acc:HGNC:3798]	34.3315	15.2887	1.16707	1.24605	12.3155	-3.30504
ENSG00000103056	SMPD3	sphingomyelin phosphodiesterase 3, neutral membrane (neutral sphingomyelinase II) [Source:HGNC Symbol;Acc:HGNC:14240]	1.77414	0.790549	1.16619	12.9075	56.8252	-2.13832
ENSG00000143079	CTTNBP2NL	CTTNBP2 N-terminal like [Source:HGNC Symbol;Acc:HGNC:25330]	1.24923	0.557121	1.16498	13.638	14.1609	-0.0542759
ENSG00000085788	DDHD2	DDHD domain containing 2 [Source:HGNC Symbol;Acc:HGNC:29106]	1.29299	0.576669	1.1649	19.0636	10.1249	0.912919
ENSG00000140280	LYSMD2	LysM, putative peptidoglycan-binding, domain containing 2 [Source:HGNC Symbol;Acc:HGNC:28571]	1.63362	0.729389	1.16331	4.67771	24.2783	-2.37579
ENSG00000133316	WDR74	WD repeat domain 74 [Source:HGNC Symbol;Acc:HGNC:25529]	2.04496	0.913425	1.16272	10.7641	23.8607	-1.1484
ENSG00000124201	ZNFX1	zinc finger, NFX1-type containing 1 [Source:HGNC Symbol;Acc:HGNC:29271]	1.26398	0.565225	1.16108	4.77403	5.2193	-0.128648
ENSG00000180035	ZNF48	zinc finger protein 48 [Source:HGNC Symbol;Acc:HGNC:13114]	0.973165	0.435278	1.16075	17.3335	10.0536	0.785859
ENSG00000175093	SPSB4	splA/ryanodine receptor domain and SOCS box containing 4 [Source:HGNC Symbol;Acc:HGNC:30630]	0.986943	0.441633	1.16012	11.6231	4.49142	1.37176
ENSG00000196368	NUDT11	nudix (nucleoside diphosphate linked moiety X)-type motif 11 [Source:HGNC Symbol;Acc:HGNC:18011]	2.32383	1.04075	1.15888	39.7902	15.4715	1.3628
ENSG00000170468	C14orf169	chromosome 14 open reading frame 169 [Source:HGNC Symbol;Acc:HGNC:20968]	0.65169	0.291975	1.15834	9.15554	5.84081	0.648476
ENSG00000167394	ZNF668	zinc finger protein 668 [Source:HGNC Symbol;Acc:HGNC:25821]	0.853111	0.38249	1.15731	3.39577	5.4917	-0.693515
ENSG00000245532	NEAT1	nuclear paraspeckle assembly transcript 1 (non-protein coding) [Source:HGNC Symbol;Acc:HGNC:30815]	2.63414	1.18168	1.15649	5.71826	2.44688	1.22463
ENSG00000185163	DDX51	DEAD (Asp-Glu-Ala-Asp) box polypeptide 51 [Source:HGNC Symbol;Acc:HGNC:20082]	1.39689	0.627193	1.15524	13.5669	4.70301	1.52843
ENSG00000155760	FZD7	frizzled class receptor 7 [Source:HGNC Symbol;Acc:HGNC:4045]	1.48052	0.666428	1.15158	12.8248	1.82301	2.81455
ENSG00000187231	SESTD1	SEC14 and spectrin domains 1 [Source:HGNC Symbol;Acc:HGNC:18379]	1.41955	0.639366	1.15072	13.0464	17.0033	-0.382163
ENSG00000174151	CYB561D1	cytochrome b561 family, member D1 [Source:HGNC Symbol;Acc:HGNC:26804]	1.09143	0.491735	1.15026	3.43687	2.77473	0.30875
ENSG00000106701	FSD1L	fibronectin type III and SPRY domain containing 1-like [Source:HGNC Symbol;Acc:HGNC:13753]	1.56404	0.706644	1.14622	7.83966	12.4116	-0.662832
ENSG00000234127	TRIM26	tripartite motif containing 26 [Source:HGNC Symbol;Acc:HGNC:12962]	1.49372	0.674993	1.14596	17.9623	4.8628	1.88511
ENSG00000150401	DCUN1D2	DCN1, defective in cullin neddylation 1, domain containing 2 [Source:HGNC Symbol;Acc:HGNC:20328]	1.32397	0.598306	1.14591	10.2314	13.6428	-0.415136
ENSG00000123297	TSFM	Ts translation elongation factor, mitochondrial [Source:HGNC Symbol;Acc:HGNC:12367]	1.11616	0.504566	1.14542	10.2125	13.5323	-0.406061
ENSG00000127863	TNFRSF19	tumor necrosis factor receptor superfamily, member 19 [Source:HGNC Symbol;Acc:HGNC:11915]	2.16195	0.978162	1.14419	5.05598	10.3068	-1.02754
ENSG00000168005	C11orf84	chromosome 11 open reading frame 84 [Source:HGNC Symbol;Acc:HGNC:25115]	1.63136	0.738759	1.1429	16.3067	8.80333	0.889342
ENSG00000069966	GNB5	guanine nucleotide binding protein (G protein), beta 5 [Source:HGNC Symbol;Acc:HGNC:4401]	1.99306	0.904626	1.13959	8.77939	47.4916	-2.43548
ENSG00000117676	RPS6KA1	ribosomal protein S6 kinase, 90kDa, polypeptide 1 [Source:HGNC Symbol;Acc:HGNC:10430]	2.02058	0.917482	1.13902	4.46894	3.03871	0.556475
ENSG00000177301	KCNA2	potassium channel, voltage gated shaker related subfamily A, member 2 [Source:HGNC Symbol;Acc:HGNC:6220]	1.07008	0.486039	1.13858	1.81734	6.19514	-1.7693
ENSG00000175832	ETV4	ets variant 4 [Source:HGNC Symbol;Acc:HGNC:3493]	1.63637	0.744152	1.13683	3.86058	5.92467	-0.617917
ENSG00000182307	C8orf33	chromosome 8 open reading frame 33 [Source:HGNC Symbol;Acc:HGNC:26104]	1.07	0.4872	1.13503	47.7911	12.4502	1.94057
ENSG00000147912	FBXO10	F-box protein 10 [Source:HGNC Symbol;Acc:HGNC:13589]	0.816113	0.371996	1.13348	3.35313	13.5806	-2.01797
ENSG00000116786	PLEKHM2	pleckstrin homology domain containing, family M (with RUN domain) member 2 [Source:HGNC Symbol;Acc:HGNC:29131]	1.34942	0.615733	1.13197	24.7153	12.603	0.97164
ENSG00000213780	GTF2H4	general transcription factor IIH, polypeptide 4, 52kDa [Source:HGNC Symbol;Acc:HGNC:4658]	1.12501	0.513491	1.13153	1.4978	5.28582	-1.81928
ENSG00000137876	RSL24D1	ribosomal L24 domain containing 1 [Source:HGNC Symbol;Acc:HGNC:18479]	1.63451	0.746579	1.13049	51.1727	19.2194	1.41281
ENSG00000153786	ZDHHC7	zinc finger, DHHC-type containing 7 [Source:HGNC Symbol;Acc:HGNC:18459]	1.12725	0.51489	1.13048	12.5626	15.4627	-0.299654
ENSG00000010270	STARD3NL	STARD3 N-terminal like [Source:HGNC Symbol;Acc:HGNC:19169]	1.89978	0.868158	1.1298	29.3269	12.0171	1.28713
ENSG00000151491	EPS8	epidermal growth factor receptor pathway substrate 8 [Source:HGNC Symbol;Acc:HGNC:3420]	1.70804	0.781593	1.12785	13.0092	10.1092	0.363865
ENSG00000115540	MOB4	MOB family member 4, phocein [Source:HGNC Symbol;Acc:HGNC:17261]	1.24548	0.569976	1.12773	15.2402	27.9177	-0.8733
ENSG00000136240	KDELR2	KDEL (Lys-Asp-Glu-Leu) endoplasmic reticulum protein retention receptor 2 [Source:HGNC Symbol;Acc:HGNC:6305]	1.62704	0.745031	1.12688	44.9828	18.6816	1.26775
ENSG00000176845	METRNL	meteorin, glial cell differentiation regulator-like [Source:HGNC Symbol;Acc:HGNC:27584]	3.16613	1.44993	1.12673	8.37377	2.31405	1.85545
ENSG00000183520	UTP11L	UTP11-like, U3 small nucleolar ribonucleoprotein (yeast) [Source:HGNC Symbol;Acc:HGNC:24329]	1.27248	0.583235	1.12549	18.383	4.55552	2.01268
ENSG00000128228	SDF2L1	stromal cell-derived factor 2-like 1 [Source:HGNC Symbol;Acc:HGNC:10676]	2.06926	0.948886	1.12481	5.30524	4.0097	0.403924
ENSG00000156502	SUPV3L1	suppressor of var1, 3-like 1 (S. cerevisiae) [Source:HGNC Symbol;Acc:HGNC:11471]	1.17872	0.540523	1.1248	14.0092	8.30328	0.754626
ENSG00000038219	BOD1L1	biorientation of chromosomes in cell division 1-like 1 [Source:HGNC Symbol;Acc:HGNC:31792]	1.31033	0.600907	1.12472	13.4239	7.02937	0.933339
ENSG00000114268	PFKFB4	6-phosphofructo-2-kinase/fructose-2,6-biphosphatase 4 [Source:HGNC Symbol;Acc:HGNC:8875]	1.18939	0.545644	1.12419	8.03273	7.40897	0.116617
ENSG00000125945	ZNF436	zinc finger protein 436 [Source:HGNC Symbol;Acc:HGNC:20814]	0.768715	0.352698	1.12401	15.4535	28.9174	-0.904004
ENSG00000128564	VGF	VGF nerve growth factor inducible [Source:HGNC Symbol;Acc:HGNC:12684]	7.39095	3.39208	1.12359	114.811	77.5354	0.566329
ENSG00000147955	SIGMAR1	sigma non-opioid intracellular receptor 1 [Source:HGNC Symbol;Acc:HGNC:8157]	0.764523	0.351314	1.1218	34.8068	24.6678	0.496739
ENSG00000183186	C2CD4C	C2 calcium-dependent domain containing 4C [Source:HGNC Symbol;Acc:HGNC:29417]	1.07604	0.4945	1.12169	15.1266	2.45618	2.6226
ENSG00000185049	NELFA	negative elongation factor complex member A [Source:HGNC Symbol;Acc:HGNC:12768]	1.22806	0.565137	1.11971	17.3507	8.02913	1.11168
ENSG00000163156	SCNM1	sodium channel modifier 1 [Source:HGNC Symbol;Acc:HGNC:23136]	1.63612	0.753859	1.11791	12.7038	9.01683	0.494566
ENSG00000148459	PDSS1	prenyl (decaprenyl) diphosphate synthase, subunit 1 [Source:HGNC Symbol;Acc:HGNC:17759]	0.968264	0.44616	1.11784	4.50025	6.34697	-0.496063
ENSG00000133641	C12orf29	chromosome 12 open reading frame 29 [Source:HGNC Symbol;Acc:HGNC:25322]	1.13052	0.520961	1.11774	6.59484	5.31643	0.310881
ENSG00000186479	RGS7BP	regulator of G-protein signaling 7 binding protein [Source:HGNC Symbol;Acc:HGNC:23271]	3.63347	1.67547	1.11678	3.18031	24.7552	-2.96049
ENSG00000168876	ANKRD49	ankyrin repeat domain 49 [Source:HGNC Symbol;Acc:HGNC:25970]	0.637135	0.294102	1.11528	4.28426	5.75276	-0.425207
ENSG00000128965	CHAC1	ChaC glutathione-specific gamma-glutamylcyclotransferase 1 [Source:HGNC Symbol;Acc:HGNC:28680]	5.84968	2.70106	1.11483	9.7058	7.18108	0.434646
ENSG00000198355	PIM3	Pim-3 proto-oncogene, serine/threonine kinase [Source:HGNC Symbol;Acc:HGNC:19310]	4.39713	2.03073	1.11456	13.8257	20.4889	-0.567488
ENSG00000183248	PRR36	proline rich 36 [Source:HGNC Symbol;Acc:HGNC:26172]	0.930987	0.43005	1.11426	31.4148	21.5059	0.546714
ENSG00000164323	CFAP97	cilia and flagella associated protein 97 [Source:HGNC Symbol;Acc:HGNC:29276]	0.77332	0.357645	1.11254	14.1896	3.83802	1.8864
ENSG00000130147	SH3BP4	SH3-domain binding protein 4 [Source:HGNC Symbol;Acc:HGNC:10826]	1.51972	0.703344	1.1115	13.0872	5.39149	1.2794
ENSG00000180921	FAM83H	family with sequence similarity 83, member H [Source:HGNC Symbol;Acc:HGNC:24797]	0.843444	0.390388	1.11138	0.773576	1.59362	-1.0427
ENSG00000102890	ELMO3	engulfment and cell motility 3 [Source:HGNC Symbol;Acc:HGNC:17289]	1.02865	0.476258	1.11093	1.61546	0.798748	1.01613
ENSG00000166016	ABTB2	ankyrin repeat and BTB (POZ) domain containing 2 [Source:HGNC Symbol;Acc:HGNC:23842]	2.78317	1.28992	1.10944	7.24554	1.93783	1.90265
ENSG00000114383	TUSC2	tumor suppressor candidate 2 [Source:HGNC Symbol;Acc:HGNC:17034]	1.1008	0.510326	1.10906	38.3231	33.9765	0.173676
ENSG00000067191	CACNB1	calcium channel, voltage-dependent, beta 1 subunit [Source:HGNC Symbol;Acc:HGNC:1401]	2.13384	0.989424	1.10879	19.2412	38.8864	-1.01507
ENSG00000168918	INPP5D	inositol polyphosphate-5-phosphatase, 145kDa [Source:HGNC Symbol;Acc:HGNC:6079]	0.957944	0.444356	1.10822	0.605909	1.09533	-0.854198
ENSG00000100744	GSKIP	GSK3B interacting protein [Source:HGNC Symbol;Acc:HGNC:20343]	1.80941	0.839968	1.10712	6.74219	5.45858	0.30469
ENSG00000184277	TM2D3	TM2 domain containing 3 [Source:HGNC Symbol;Acc:HGNC:24128]	1.16296	0.540077	1.10656	35.3929	11.5455	1.61613
ENSG00000145911	N4BP3	NEDD4 binding protein 3 [Source:HGNC Symbol;Acc:HGNC:29852]	2.06989	0.96152	1.10617	5.18677	4.42458	0.229295
ENSG00000204519	ZNF551	zinc finger protein 551 [Source:HGNC Symbol;Acc:HGNC:25108]	0.800613	0.372585	1.10353	3.56845	2.12192	0.74993
ENSG00000094841	UPRT	uracil phosphoribosyltransferase (FUR1) homolog (S. cerevisiae) [Source:HGNC Symbol;Acc:HGNC:28334]	1.18426	0.551403	1.10281	10.3699	4.0263	1.36488
ENSG00000128191	DGCR8	DGCR8 microprocessor complex subunit [Source:HGNC Symbol;Acc:HGNC:2847]	1.13389	0.527967	1.10276	13.6142	9.14772	0.57363
ENSG00000156853	ZNF689	zinc finger protein 689 [Source:HGNC Symbol;Acc:HGNC:25173]	0.510323	0.237627	1.10271	7.90474	2.92136	1.43608
ENSG00000179564	LSMEM2	leucine-rich single-pass membrane protein 2 [Source:HGNC Symbol;Acc:HGNC:26781]	1.05085	0.489412	1.10244	1.35947	1.69972	-0.322252
ENSG00000136273	HUS1	HUS1 checkpoint clamp component [Source:HGNC Symbol;Acc:HGNC:5309]	1.33034	0.620222	1.10093	3.38827	2.07815	0.705253
ENSG00000166106	ADAMTS15	ADAM metallopeptidase with thrombospondin type 1 motif, 15 [Source:HGNC Symbol;Acc:HGNC:16305]	0.903559	0.421368	1.10054	2.37428	3.99744	-0.751585
ENSG00000152223	EPG5	ectopic P-granules autophagy protein 5 homolog (C. elegans) [Source:HGNC Symbol;Acc:HGNC:29331]	0.903609	0.421737	1.09935	4.27005	4.90123	-0.19889
ENSG00000139112	GABARAPL1	GABA(A) receptor-associated protein like 1 [Source:HGNC Symbol;Acc:HGNC:4068]	3.19116	1.4896	1.09915	35.2947	158.229	-2.16449
ENSG00000163932	PRKCD	protein kinase C, delta [Source:HGNC Symbol;Acc:HGNC:9399]	2.00525	0.936165	1.09895	1.24002	6.27962	-2.34031
ENSG00000132603	NIP7	NIP7, nucleolar pre-rRNA processing protein [Source:HGNC Symbol;Acc:HGNC:24328]	1.19265	0.556804	1.09893	5.03602	14.4818	-1.52388
ENSG00000165219	GAPVD1	GTPase activating protein and VPS9 domains 1 [Source:HGNC Symbol;Acc:HGNC:23375]	1.43887	0.672097	1.0982	8.88899	17.4913	-0.976549
ENSG00000147324	MFHAS1	malignant fibrous histiocytoma amplified sequence 1 [Source:HGNC Symbol;Acc:HGNC:16982]	2.30495	1.07768	1.09681	8.34546	10.345	-0.309869
ENSG00000145860	RNF145	ring finger protein 145 [Source:HGNC Symbol;Acc:HGNC:20853]	1.28619	0.602096	1.09504	38.451	25.2619	0.606059
ENSG00000175229	GAL3ST3	galactose-3-O-sulfotransferase 3 [Source:HGNC Symbol;Acc:HGNC:24144]	1.11911	0.524308	1.09387	11.1272	21.6318	-0.959059
ENSG00000085978	ATG16L1	autophagy related 16-like 1 [Source:HGNC Symbol;Acc:HGNC:21498]	1.60976	0.754404	1.09344	13.3209	21.4767	-0.689085
ENSG00000136997	MYC	v-myc avian myelocytomatosis viral oncogene homolog [Source:HGNC Symbol;Acc:HGNC:7553]	1.44671	0.67825	1.09289	9.13845	17.8229	-0.963709
ENSG00000164221	CCDC112	coiled-coil domain containing 112 [Source:HGNC Symbol;Acc:HGNC:28599]	1.04944	0.492053	1.09274	23.1363	9.13213	1.34114
ENSG00000058063	ATP11B	ATPase, class VI, type 11B [Source:HGNC Symbol;Acc:HGNC:13553]	2.1939	1.02869	1.0927	4.11416	22.8357	-2.47262
ENSG00000115761	NOL10	nucleolar protein 10 [Source:HGNC Symbol;Acc:HGNC:25862]	1.25475	0.58881	1.09153	4.80167	11.6125	-1.27407
ENSG00000180875	GREM2	gremlin 2, DAN family BMP antagonist [Source:HGNC Symbol;Acc:HGNC:17655]	2.49832	1.17241	1.09148	4.26902	7.43282	-0.800005
ENSG00000267909	CCDC177	coiled-coil domain containing 177 [Source:HGNC Symbol;Acc:HGNC:23243]	0.489269	0.22967	1.09107	7.66686	4.25198	0.850499
ENSG00000127080	IPPK	inositol 1,3,4,5,6-pentakisphosphate 2-kinase [Source:HGNC Symbol;Acc:HGNC:14645]	1.0064	0.472636	1.09041	1.8796	5.70367	-1.60146
ENSG00000125449	ARMC7	armadillo repeat containing 7 [Source:HGNC Symbol;Acc:HGNC:26168]	1.05164	0.494396	1.08891	5.80314	4.09904	0.50155
ENSG00000136848	DAB2IP	DAB2 interacting protein [Source:HGNC Symbol;Acc:HGNC:17294]	1.46564	0.689328	1.08827	32.5161	25.2489	0.364929
ENSG00000119574	ZBTB45	zinc finger and BTB domain containing 45 [Source:HGNC Symbol;Acc:HGNC:23715]	0.668669	0.314767	1.08701	13.3661	11.6918	0.193084
ENSG00000196867	ZFP28	ZFP28 zinc finger protein [Source:HGNC Symbol;Acc:HGNC:17801]	0.943505	0.444387	1.08621	3.09093	3.94774	-0.352984
ENSG00000111911	HINT3	histidine triad nucleotide binding protein 3 [Source:HGNC Symbol;Acc:HGNC:18468]	1.50852	0.711116	1.08497	26.9822	8.02098	1.75016
ENSG00000115525	ST3GAL5	ST3 beta-galactoside alpha-2,3-sialyltransferase 5 [Source:HGNC Symbol;Acc:HGNC:10872]	1.94909	0.919367	1.08409	14.6654	33.8574	-1.20705
ENSG00000160256	FAM207A	family with sequence similarity 207, member A [Source:HGNC Symbol;Acc:HGNC:15811]	1.03191	0.487092	1.08305	11.6667	13.5886	-0.22
ENSG00000122912	SLC25A16	solute carrier family 25 (mitochondrial carrier), member 16 [Source:HGNC Symbol;Acc:HGNC:10986]	0.988592	0.466913	1.08222	3.98313	12.8945	-1.69478
ENSG00000166454	ATMIN	ATM interactor [Source:HGNC Symbol;Acc:HGNC:29034]	1.30933	0.61857	1.08182	21.7253	9.70897	1.16199
ENSG00000150893	FREM2	FRAS1 related extracellular matrix protein 2 [Source:HGNC Symbol;Acc:HGNC:25396]	1.26208	0.596391	1.08148	0.596329	1.78814	-1.58428
ENSG00000116062	MSH6	mutS homolog 6 [Source:HGNC Symbol;Acc:HGNC:7329]	1.39806	0.660662	1.08144	9.31624	5.52764	0.753085
ENSG00000146909	NOM1	nucleolar protein with MIF4G domain 1 [Source:HGNC Symbol;Acc:HGNC:13244]	1.15917	0.548364	1.07988	3.39466	3.523	-0.0535357
ENSG00000125834	STK35	serine/threonine kinase 35 [Source:HGNC Symbol;Acc:HGNC:16254]	1.96182	0.928496	1.07922	5.8856	7.0189	-0.254055
ENSG00000155034	FBXL18	F-box and leucine-rich repeat protein 18 [Source:HGNC Symbol;Acc:HGNC:21874]	1.30661	0.618736	1.07844	6.62611	6.97337	-0.0736934
ENSG00000099814	CEP170B	centrosomal protein 170B [Source:HGNC Symbol;Acc:HGNC:20362]	1.91245	0.905979	1.07787	20.4964	48.2802	-1.23606
ENSG00000129159	KCNC1	potassium channel, voltage gated Shaw related subfamily C, member 1 [Source:HGNC Symbol;Acc:HGNC:6233]	1.61867	0.768001	1.07563	8.23856	13.0863	-0.667588
ENSG00000101134	DOK5	docking protein 5 [Source:HGNC Symbol;Acc:HGNC:16173]	1.76994	0.840442	1.07448	27.3388	66.0221	-1.272
ENSG00000171161	ZNF672	zinc finger protein 672 [Source:HGNC Symbol;Acc:HGNC:26179]	1.02017	0.484894	1.07307	14.1138	8.54016	0.724767
ENSG00000172375	C2CD2L	C2CD2-like [Source:HGNC Symbol;Acc:HGNC:29000]	1.87714	0.892462	1.07268	8.58674	28.462	-1.72885
ENSG00000137252	HCRTR2	hypocretin (orexin) receptor 2 [Source:HGNC Symbol;Acc:HGNC:4849]	2.07771	0.987856	1.07262	2.61907	1.24451	1.07348
ENSG00000168795	ZBTB5	zinc finger and BTB domain containing 5 [Source:HGNC Symbol;Acc:HGNC:23836]	1.23544	0.58753	1.0723	16.5272	6.89677	1.26085
ENSG00000112852	PCDHB2	protocadherin beta 2 [Source:HGNC Symbol;Acc:HGNC:8687]	1.39425	0.663081	1.07223	19.1034	2.65024	2.84964
ENSG00000118655	DCLRE1B	DNA cross-link repair 1B [Source:HGNC Symbol;Acc:HGNC:17641]	0.662552	0.315216	1.07169	5.80399	1.38076	2.07158
ENSG00000196419	XRCC6	X-ray repair complementing defective repair in Chinese hamster cells 6 [Source:HGNC Symbol;Acc:HGNC:4055]	1.37183	0.65269	1.07163	95.7199	4.24355	4.49548
ENSG00000135108	FBXO21	F-box protein 21 [Source:HGNC Symbol;Acc:HGNC:13592]	1.06517	0.506925	1.07124	26.3237	50.8343	-0.94944
ENSG00000167536	DHRS13	dehydrogenase/reductase (SDR family) member 13 [Source:HGNC Symbol;Acc:HGNC:28326]	1.09429	0.520826	1.07113	12.7468	11.0545	0.205505
ENSG00000165389	SPTSSA	serine palmitoyltransferase, small subunit A [Source:HGNC Symbol;Acc:HGNC:20361]	2.38273	1.13531	1.06953	12.0534	32.1491	-1.41533
ENSG00000116691	MIIP	migration and invasion inhibitory protein [Source:HGNC Symbol;Acc:HGNC:25715]	1.11303	0.530372	1.06942	22.2207	6.48644	1.77641
ENSG00000128791	TWSG1	twisted gastrulation BMP signaling modulator 1 [Source:HGNC Symbol;Acc:HGNC:12429]	1.74651	0.832321	1.06926	6.75528	11.8197	-0.807104
ENSG00000108861	DUSP3	dual specificity phosphatase 3 [Source:HGNC Symbol;Acc:HGNC:3069]	2.21007	1.05381	1.06847	11.9103	13.7812	-0.210492
ENSG00000205927	OLIG2	oligodendrocyte lineage transcription factor 2 [Source:HGNC Symbol;Acc:HGNC:9398]	1.28174	0.611329	1.06808	0.947743	4.62541	-2.28701
ENSG00000135241	PNPLA8	patatin-like phospholipase domain containing 8 [Source:HGNC Symbol;Acc:HGNC:28900]	2.57122	1.22677	1.06759	20.5454	34.6044	-0.75214
ENSG00000135299	ANKRD6	ankyrin repeat domain 6 [Source:HGNC Symbol;Acc:HGNC:17280]	1.35729	0.647591	1.06758	18.6223	7.61322	1.29045
ENSG00000141560	FN3KRP	fructosamine 3 kinase related protein [Source:HGNC Symbol;Acc:HGNC:25700]	1.04153	0.497126	1.06703	24.096	4.4514	2.43647
ENSG00000105711	SCN1B	sodium channel, voltage gated, type I beta subunit [Source:HGNC Symbol;Acc:HGNC:10586]	2.84032	1.35694	1.06569	0.568412	49.8332	-6.45403
ENSG00000160294	MCM3AP	minichromosome maintenance complex component 3 associated protein [Source:HGNC Symbol;Acc:HGNC:6946]	0.995506	0.47571	1.06535	16.8431	10.7224	0.651531
ENSG00000130584	ZBTB46	zinc finger and BTB domain containing 46 [Source:HGNC Symbol;Acc:HGNC:16094]	0.99989	0.477866	1.06516	7.55065	3.1283	1.27122
ENSG00000179271	GADD45GIP1	growth arrest and DNA-damage-inducible, gamma interacting protein 1 [Source:HGNC Symbol;Acc:HGNC:29996]	1.27026	0.607182	1.06492	19.7037	6.80838	1.53308
ENSG00000110435	PDHX	pyruvate dehydrogenase complex, component X [Source:HGNC Symbol;Acc:HGNC:21350]	1.5877	0.759069	1.06463	23.1789	28.1199	-0.278781
ENSG00000105186	ANKRD27	ankyrin repeat domain 27 (VPS9 domain) [Source:HGNC Symbol;Acc:HGNC:25310]	1.32674	0.634372	1.06448	6.02777	9.86979	-0.711395
ENSG00000089916	GPATCH2L	G patch domain containing 2-like [Source:HGNC Symbol;Acc:HGNC:20210]	1.22462	0.585691	1.06413	7.82026	11.9271	-0.608953
ENSG00000128268	MGAT3	mannosyl (beta-1,4-)-glycoprotein beta-1,4-N-acetylglucosaminyltransferase [Source:HGNC Symbol;Acc:HGNC:7046]	1.17335	0.561408	1.06351	28.7265	39.8639	-0.472699
ENSG00000181817	LSM10	LSM10, U7 small nuclear RNA associated [Source:HGNC Symbol;Acc:HGNC:17562]	1.07626	0.515713	1.06139	26.2566	10.8959	1.26889
ENSG00000165512	ZNF22	zinc finger protein 22 [Source:HGNC Symbol;Acc:HGNC:13012]	1.05045	0.503584	1.0607	11.9435	12.0105	-0.00805936
ENSG00000138185	ENTPD1	ectonucleoside triphosphate diphosphohydrolase 1 [Source:HGNC Symbol;Acc:HGNC:3363]	0.908621	0.435614	1.06063	3.65024	1.3828	1.4004
ENSG00000164758	MED30	mediator complex subunit 30 [Source:HGNC Symbol;Acc:HGNC:23032]	2.01264	0.964971	1.06053	7.71441	15.5077	-1.00736
ENSG00000210194	MT-TE	mitochondrially encoded tRNA glutamic acid [Source:HGNC Symbol;Acc:HGNC:7479]	1.08748	0.522007	1.05885	108.85	93.9946	0.211688
ENSG00000198146	ZNF770	zinc finger protein 770 [Source:HGNC Symbol;Acc:HGNC:26061]	0.731583	0.351314	1.05826	17.1218	9.35778	0.871594
ENSG00000076321	KLHL20	kelch-like family member 20 [Source:HGNC Symbol;Acc:HGNC:25056]	0.916673	0.440317	1.05787	10.2709	7.14053	0.524455
ENSG00000198369	SPRED2	sprouty-related, EVH1 domain containing 2 [Source:HGNC Symbol;Acc:HGNC:17722]	2.21094	1.06315	1.05632	10.3953	22.077	-1.0866
ENSG00000149639	SOGA1	suppressor of glucose, autophagy associated 1 [Source:HGNC Symbol;Acc:HGNC:16111]	1.10441	0.53113	1.05614	22.0239	16.3043	0.433822
ENSG00000185112	FAM43A	family with sequence similarity 43, member A [Source:HGNC Symbol;Acc:HGNC:26888]	1.24919	0.601521	1.05431	5.23161	4.09673	0.352781
ENSG00000140564	FURIN	furin (paired basic amino acid cleaving enzyme) [Source:HGNC Symbol;Acc:HGNC:8568]	1.92356	0.927059	1.05305	8.33019	9.91866	-0.251796
ENSG00000173638	SLC19A1	solute carrier family 19 (folate transporter), member 1 [Source:HGNC Symbol;Acc:HGNC:10937]	1.3132	0.633367	1.05198	6.7362	5.9381	0.181933
ENSG00000196422	PPP1R26	protein phosphatase 1, regulatory subunit 26 [Source:HGNC Symbol;Acc:HGNC:29089]	0.989016	0.477059	1.05183	17.4336	6.63458	1.3938
ENSG00000023330	ALAS1	5'-aminolevulinate synthase 1 [Source:HGNC Symbol;Acc:HGNC:396]	1.17857	0.568811	1.05101	26.6061	13.6049	0.96763
ENSG00000003987	MTMR7	myotubularin related protein 7 [Source:HGNC Symbol;Acc:HGNC:7454]	1.09183	0.527223	1.05026	8.47949	22.5143	-1.40879
ENSG00000167964	RAB26	RAB26, member RAS oncogene family [Source:HGNC Symbol;Acc:HGNC:14259]	1.72717	0.834121	1.05008	4.11708	7.48979	-0.863302
ENSG00000177150	FAM210A	family with sequence similarity 210, member A [Source:HGNC Symbol;Acc:HGNC:28346]	1.17178	0.565992	1.04985	3.90441	3.41482	0.193294
ENSG00000138623	SEMA7A	semaphorin 7A, GPI membrane anchor (John Milton Hagen blood group) [Source:HGNC Symbol;Acc:HGNC:10741]	1.5834	0.765008	1.04948	4.14929	51.0507	-3.62099
ENSG00000120688	WBP4	WW domain binding protein 4 [Source:HGNC Symbol;Acc:HGNC:12739]	1.53492	0.741759	1.04914	5.89877	15.4528	-1.38938
ENSG00000011260	UTP18	UTP18 small subunit (SSU) processome component homolog (yeast) [Source:HGNC Symbol;Acc:HGNC:24274]	1.5909	0.769188	1.04844	17.2306	12.0296	0.51839
ENSG00000102057	KCND1	potassium channel, voltage gated Shal related subfamily D, member 1 [Source:HGNC Symbol;Acc:HGNC:6237]	1.14475	0.553571	1.0482	1.36925	3.17011	-1.21115
ENSG00000267796	LIN37	lin-37 DREAM MuvB core complex component [Source:HGNC Symbol;Acc:HGNC:33234]	0.919716	0.445647	1.04529	5.65937	12.2004	-1.10821
ENSG00000101463	SYNDIG1	synapse differentiation inducing 1 [Source:HGNC Symbol;Acc:HGNC:15885]	1.29421	0.627356	1.04472	7.5269	18.7139	-1.31398
ENSG00000196437	ZNF569	zinc finger protein 569 [Source:HGNC Symbol;Acc:HGNC:24737]	0.960178	0.465565	1.04432	5.30884	5.88686	-0.1491
ENSG00000164045	CDC25A	cell division cycle 25A [Source:HGNC Symbol;Acc:HGNC:1725]	1.33031	0.64535	1.04361	4.25051	2.63631	0.689114
ENSG00000090565	RAB11FIP3	RAB11 family interacting protein 3 (class II) [Source:HGNC Symbol;Acc:HGNC:17224]	1.53665	0.746199	1.04215	29.0333	22.3004	0.380639
ENSG00000141568	FOXK2	forkhead box K2 [Source:HGNC Symbol;Acc:HGNC:6036]	1.8636	0.904991	1.04212	17.5195	45.5392	-1.37815
ENSG00000089195	TRMT6	tRNA methyltransferase 6 [Source:HGNC Symbol;Acc:HGNC:20900]	0.969275	0.470838	1.04168	8.11381	6.00311	0.434669
ENSG00000177548	RABEP2	rabaptin, RAB GTPase binding effector protein 2 [Source:HGNC Symbol;Acc:HGNC:24817]	0.790918	0.384435	1.04079	4.93698	4.98464	-0.0138605
ENSG00000176022	B3GALT6	UDP-Gal:betaGal beta 1,3-galactosyltransferase polypeptide 6 [Source:HGNC Symbol;Acc:HGNC:17978]	0.874702	0.426013	1.03789	32.4403	6.08355	2.4148
ENSG00000070047	PHRF1	PHD and ring finger domains 1 [Source:HGNC Symbol;Acc:HGNC:24351]	1.09722	0.534472	1.03766	11.8889	12.7168	-0.0971162
ENSG00000170385	SLC30A1	solute carrier family 30 (zinc transporter), member 1 [Source:HGNC Symbol;Acc:HGNC:11012]	1.61857	0.788647	1.03727	4.23835	6.85433	-0.693513
ENSG00000116574	RHOU	ras homolog family member U [Source:HGNC Symbol;Acc:HGNC:17794]	0.881436	0.42948	1.03726	7.90841	28.5094	-1.84998
ENSG00000127334	DYRK2	dual-specificity tyrosine-(Y)-phosphorylation regulated kinase 2 [Source:HGNC Symbol;Acc:HGNC:3093]	1.45279	0.708024	1.03696	8.24946	28.5903	-1.79315
ENSG00000111728	ST8SIA1	ST8 alpha-N-acetyl-neuraminide alpha-2,8-sialyltransferase 1 [Source:HGNC Symbol;Acc:HGNC:10869]	1.09723	0.534743	1.03695	5.91952	4.46561	0.406623
ENSG00000102543	CDADC1	cytidine and dCMP deaminase domain containing 1 [Source:HGNC Symbol;Acc:HGNC:20299]	1.53267	0.747069	1.03674	5.18733	12.8999	-1.3143
ENSG00000112679	DUSP22	dual specificity phosphatase 22 [Source:HGNC Symbol;Acc:HGNC:16077]	1.1092	0.540673	1.03669	9.60166	11.3743	-0.244424
ENSG00000142751	GPN2	GPN-loop GTPase 2 [Source:HGNC Symbol;Acc:HGNC:25513]	1.34097	0.653774	1.03641	9.20213	5.58125	0.72138
ENSG00000234965	SHISA8	shisa family member 8 [Source:HGNC Symbol;Acc:HGNC:18351]	1.21348	0.592071	1.03531	1.53521	1.53457	0.000602626
ENSG00000127870	RNF6	ring finger protein (C3H2C3 type) 6 [Source:HGNC Symbol;Acc:HGNC:10069]	1.51506	0.739275	1.03519	5.59686	10.5529	-0.914945
ENSG00000102786	INTS6	integrator complex subunit 6 [Source:HGNC Symbol;Acc:HGNC:14879]	1.60526	0.783467	1.03486	1.9321	3.74821	-0.956032
ENSG00000160551	TAOK1	TAO kinase 1 [Source:HGNC Symbol;Acc:HGNC:29259]	1.5855	0.773874	1.03477	17.7309	13.279	0.417114
ENSG00000196504	PRPF40A	PRP40 pre-mRNA processing factor 40 homolog A [Source:HGNC Symbol;Acc:HGNC:16463]	1.42661	0.696524	1.03434	13.4231	9.53328	0.493673
ENSG00000101191	DIDO1	death inducer-obliterator 1 [Source:HGNC Symbol;Acc:HGNC:2680]	1.74102	0.850376	1.03376	13.6539	8.82806	0.629147
ENSG00000114125	RNF7	ring finger protein 7 [Source:HGNC Symbol;Acc:HGNC:10070]	1.9354	0.945413	1.03362	20.9735	40.0153	-0.931983
ENSG00000066923	STAG3	stromal antigen 3 [Source:HGNC Symbol;Acc:HGNC:11356]	1.33246	0.651015	1.03333	4.79649	2.49048	0.945555
ENSG00000121057	AKAP1	A kinase (PRKA) anchor protein 1 [Source:HGNC Symbol;Acc:HGNC:367]	0.970284	0.474391	1.03233	15.1835	17.4935	-0.204315
ENSG00000091009	RBM27	RNA binding motif protein 27 [Source:HGNC Symbol;Acc:HGNC:29243]	1.05731	0.5173	1.03133	3.56627	5.34126	-0.582762
ENSG00000133104	SPG20	spastic paraplegia 20 (Troyer syndrome) [Source:HGNC Symbol;Acc:HGNC:18514]	1.4173	0.6938	1.03055	10.0886	2.93065	1.78343
ENSG00000159248	GJD2	gap junction protein, delta 2, 36kDa [Source:HGNC Symbol;Acc:HGNC:19154]	1.31421	0.643742	1.02965	3.31807	13.0299	-1.97341
ENSG00000157796	WDR19	WD repeat domain 19 [Source:HGNC Symbol;Acc:HGNC:18340]	1.01974	0.499856	1.02861	15.8849	5.3616	1.56692
ENSG00000009830	POMT2	protein-O-mannosyltransferase 2 [Source:HGNC Symbol;Acc:HGNC:19743]	1.05161	0.515711	1.02796	9.68709	7.69351	0.332421
ENSG00000175606	TMEM70	transmembrane protein 70 [Source:HGNC Symbol;Acc:HGNC:26050]	1.52504	0.748774	1.02624	16.4904	22.5535	-0.45172
ENSG00000105248	CCDC94	coiled-coil domain containing 94 [Source:HGNC Symbol;Acc:HGNC:25518]	1.09061	0.535636	1.0258	18.9157	6.0271	1.65005
ENSG00000176490	DIRAS1	DIRAS family, GTP-binding RAS-like 1 [Source:HGNC Symbol;Acc:HGNC:19127]	1.06372	0.523128	1.02388	38.0219	39.4547	-0.0533682
ENSG00000136950	ARPC5L	actin related protein 2/3 complex, subunit 5-like [Source:HGNC Symbol;Acc:HGNC:23366]	1.79464	0.882934	1.02332	18.5132	16.3434	0.179851
ENSG00000178896	EXOSC4	exosome component 4 [Source:HGNC Symbol;Acc:HGNC:18189]	0.888591	0.43784	1.02112	11.8441	9.65471	0.294859
ENSG00000143179	UCK2	uridine-cytidine kinase 2 [Source:HGNC Symbol;Acc:HGNC:12562]	1.00725	0.496683	1.02003	8.87365	21.8239	-1.29831
ENSG00000143479	DYRK3	dual-specificity tyrosine-(Y)-phosphorylation regulated kinase 3 [Source:HGNC Symbol;Acc:HGNC:3094]	1.39049	0.685678	1.01999	3.62999	5.53047	-0.607437
ENSG00000178184	PARD6G	par-6 family cell polarity regulator gamma [Source:HGNC Symbol;Acc:HGNC:16076]	1.17846	0.581627	1.01874	3.36856	5.94879	-0.820463
ENSG00000169255	B3GALNT1	beta-1,3-N-acetylgalactosaminyltransferase 1 (globoside blood group) [Source:HGNC Symbol;Acc:HGNC:918]	0.928052	0.458352	1.01775	29.5958	28.6068	0.0490362
ENSG00000272333	KMT2B	lysine (K)-specific methyltransferase 2B [Source:HGNC Symbol;Acc:HGNC:15840]	1.36499	0.674378	1.01726	15.5128	12.7727	0.280391
ENSG00000092445	TYRO3	TYRO3 protein tyrosine kinase [Source:HGNC Symbol;Acc:HGNC:12446]	2.26062	1.11784	1.01601	4.72236	17.5069	-1.89034
ENSG00000174672	BRSK2	BR serine/threonine kinase 2 [Source:HGNC Symbol;Acc:HGNC:11405]	1.34756	0.666997	1.0146	43.7725	52.4449	-0.260776
ENSG00000197380	DACT3	dishevelled-binding antagonist of beta-catenin 3 [Source:HGNC Symbol;Acc:HGNC:30745]	2.35617	1.16654	1.01421	24.7291	47.0042	-0.92658
ENSG00000048392	RRM2B	ribonucleotide reductase M2 B (TP53 inducible) [Source:HGNC Symbol;Acc:HGNC:17296]	1.33294	0.65999	1.01409	7.84052	5.48957	0.514256
ENSG00000169895	SYAP1	synapse associated protein 1 [Source:HGNC Symbol;Acc:HGNC:16273]	2.39295	1.18546	1.01335	14.335	20.5047	-0.516413
ENSG00000169116	PARM1	prostate androgen-regulated mucin-like protein 1 [Source:HGNC Symbol;Acc:HGNC:24536]	1.75406	0.869206	1.01293	3.23167	5.21202	-0.689561
ENSG00000168172	HOOK3	hook microtubule-tethering protein 3 [Source:HGNC Symbol;Acc:HGNC:23576]	1.35296	0.670514	1.01277	3.69959	5.96824	-0.68994
ENSG00000140044	JDP2	Jun dimerization protein 2 [Source:HGNC Symbol;Acc:HGNC:17546]	1.84632	0.915486	1.01205	1.5332	9.95157	-2.69838
ENSG00000134265	NAPG	N-ethylmaleimide-sensitive factor attachment protein, gamma [Source:HGNC Symbol;Acc:HGNC:7642]	1.72172	0.85374	1.01198	19.2299	43.8869	-1.19043
ENSG00000164916	FOXK1	forkhead box K1 [Source:HGNC Symbol;Acc:HGNC:23480]	0.952312	0.473814	1.00711	7.04633	9.99649	-0.504549
ENSG00000105229	PIAS4	protein inhibitor of activated STAT, 4 [Source:HGNC Symbol;Acc:HGNC:17002]	1.15861	0.576695	1.00652	13.1818	11.795	0.160375
ENSG00000255690	TRIL	TLR4 interactor with leucine-rich repeats [Source:HGNC Symbol;Acc:HGNC:22200]	0.561965	0.279783	1.00617	8.11443	3.46985	1.22562
ENSG00000115364	MRPL19	mitochondrial ribosomal protein L19 [Source:HGNC Symbol;Acc:HGNC:14052]	1.24235	0.619004	1.00505	7.13489	5.3056	0.427376
ENSG00000128891	C15orf57	chromosome 15 open reading frame 57 [Source:HGNC Symbol;Acc:HGNC:28295]	1.54467	0.7698	1.00475	2.5727	29.9987	-3.54355
ENSG00000183579	ZNRF3	zinc and ring finger 3 [Source:HGNC Symbol;Acc:HGNC:18126]	1.38283	0.689297	1.00442	3.72796	1.90405	0.969312
ENSG00000182544	MFSD5	major facilitator superfamily domain containing 5 [Source:HGNC Symbol;Acc:HGNC:28156]	1.00706	0.501993	1.00442	13.572	21.8842	-0.689251
ENSG00000179292	TMEM151A	transmembrane protein 151A [Source:HGNC Symbol;Acc:HGNC:28497]	1.40516	0.701271	1.00269	14.0575	37.3206	-1.40863
ENSG00000138802	SEC24B	SEC24 family member B [Source:HGNC Symbol;Acc:HGNC:10704]	1.45434	0.726354	1.00162	11.6162	17.4532	-0.587351
ENSG00000109586	GALNT7	polypeptide N-acetylgalactosaminyltransferase 7 [Source:HGNC Symbol;Acc:HGNC:4129]	0.959292	0.479316	1.00099	4.33234	3.02095	0.520143
ENSG00000105325	FZR1	fizzy/cell division cycle 20 related 1 [Source:HGNC Symbol;Acc:HGNC:24824]	1.69627	0.847951	1.00031	25.1201	40.7122	-0.696619
ENSG00000088826	SMOX	spermine oxidase [Source:HGNC Symbol;Acc:HGNC:15862]	1.46186	0.73082	1.00021	11.2594	11.8909	-0.0787216
ENSG00000114904	NEK4	NIMA-related kinase 4 [Source:HGNC Symbol;Acc:HGNC:11399]	1.25567	0.62778	1.00012	6.86391	5.14272	0.416499
ENSG00000167461	RAB8A	RAB8A, member RAS oncogene family [Source:HGNC Symbol;Acc:HGNC:7007]	1.35173	0.675982	0.999753	6.2947	10.5546	-0.74567
ENSG00000198513	ATL1	atlastin GTPase 1 [Source:HGNC Symbol;Acc:HGNC:11231]	1.82904	0.914998	0.99925	24.4382	45.4759	-0.895964
ENSG00000138944	KIAA1644	KIAA1644 [Source:HGNC Symbol;Acc:HGNC:29335]	1.50817	0.754612	0.998995	13.7546	8.24821	0.737763
ENSG00000205269	TMEM170B	transmembrane protein 170B [Source:HGNC Symbol;Acc:HGNC:34244]	1.71999	0.8606	0.998983	12.73	15.1914	-0.255012
ENSG00000184205	TSPYL2	TSPY-like 2 [Source:HGNC Symbol;Acc:HGNC:24358]	2.36636	1.18408	0.998906	29.7487	26.6378	0.159351
ENSG00000180044	C3orf80	chromosome 3 open reading frame 80 [Source:HGNC Symbol;Acc:HGNC:40048]	0.494347	0.247438	0.998457	1.16001	2.81187	-1.27738
ENSG00000132005	RFX1	regulatory factor X, 1 (influences HLA class II expression) [Source:HGNC Symbol;Acc:HGNC:9982]	1.3131	0.657303	0.998348	8.44661	7.47376	0.176538
ENSG00000168303	MPLKIP	M-phase specific PLK1 interacting protein [Source:HGNC Symbol;Acc:HGNC:16002]	1.04233	0.521863	0.998073	4.06846	5.25956	-0.37046
ENSG00000126767	ELK1	ELK1, member of ETS oncogene family [Source:HGNC Symbol;Acc:HGNC:3321]	1.64524	0.823915	0.997729	13.3869	12.8808	0.0555976
ENSG00000103343	ZNF174	zinc finger protein 174 [Source:HGNC Symbol;Acc:HGNC:12963]	0.994787	0.498284	0.997421	7.45502	1.70892	2.12512
ENSG00000104221	BRF2	BRF2, RNA polymerase III transcription initiation factor 50 kDa subunit [Source:HGNC Symbol;Acc:HGNC:17298]	0.892305	0.447187	0.996659	4.99561	12.3989	-1.31147
ENSG00000111912	NCOA7	nuclear receptor coactivator 7 [Source:HGNC Symbol;Acc:HGNC:21081]	1.47372	0.738591	0.99661	9.05693	13.4515	-0.570668
ENSG00000213533	TMEM110	transmembrane protein 110 [Source:HGNC Symbol;Acc:HGNC:30526]	1.06864	0.535791	0.99604	0.557779	6.17615	-3.46894
ENSG00000254093	PINX1	PIN2/TERF1 interacting, telomerase inhibitor 1 [Source:HGNC Symbol;Acc:HGNC:30046]	1.1449	0.574242	0.995485	3.3577	4.09238	-0.285466
ENSG00000212493	SNORD19	small nucleolar RNA, C/D box 19 [Source:HGNC Symbol;Acc:HGNC:32717]	1.32164	0.663192	0.994837	2.3914	4.7853	-1.00075
ENSG00000125656	CLPP	caseinolytic mitochondrial matrix peptidase proteolytic subunit [Source:HGNC Symbol;Acc:HGNC:2084]	1.32719	0.666431	0.993846	34.9553	30.8871	0.178506
ENSG00000164284	GRPEL2	GrpE-like 2, mitochondrial (E. coli) [Source:HGNC Symbol;Acc:HGNC:21060]	1.32483	0.666216	0.991748	10.5783	9.26735	0.190874
ENSG00000197381	ADARB1	adenosine deaminase, RNA-specific, B1 [Source:HGNC Symbol;Acc:HGNC:226]	2.00151	1.00727	0.990644	6.74901	23.282	-1.78646
ENSG00000125633	CCDC93	coiled-coil domain containing 93 [Source:HGNC Symbol;Acc:HGNC:25611]	1.15635	0.581962	0.990583	14.683	5.38801	1.44632
ENSG00000154217	PITPNC1	phosphatidylinositol transfer protein, cytoplasmic 1 [Source:HGNC Symbol;Acc:HGNC:21045]	1.96208	0.987776	0.990126	12.2557	17.3106	-0.49821
ENSG00000198885	ITPRIPL1	inositol 1,4,5-trisphosphate receptor interacting protein-like 1 [Source:HGNC Symbol;Acc:HGNC:29371]	0.833141	0.419896	0.988529	0.613925	1.5886	-1.37163
ENSG00000160325	CACFD1	calcium channel flower domain containing 1 [Source:HGNC Symbol;Acc:HGNC:1365]	1.3011	0.656001	0.987968	26.4024	32.2114	-0.286901
ENSG00000188766	SPRED3	sprouty-related, EVH1 domain containing 3 [Source:HGNC Symbol;Acc:HGNC:31041]	1.53787	0.775678	0.987404	12.8873	21.9603	-0.768945
ENSG00000157827	FMNL2	formin-like 2 [Source:HGNC Symbol;Acc:HGNC:18267]	1.22957	0.620215	0.987309	25.865	15.3182	0.755756
ENSG00000182272	B4GALNT4	beta-1,4-N-acetyl-galactosaminyl transferase 4 [Source:HGNC Symbol;Acc:HGNC:26315]	1.46719	0.740278	0.986921	114.672	40.5382	1.50015
ENSG00000136710	CCDC115	coiled-coil domain containing 115 [Source:HGNC Symbol;Acc:HGNC:28178]	1.06113	0.535851	0.985694	18.1614	13.7306	0.403482
ENSG00000173011	TADA2B	transcriptional adaptor 2B [Source:HGNC Symbol;Acc:HGNC:30781]	1.25285	0.632851	0.985282	9.93537	11.067	-0.155613
ENSG00000181915	ADO	2-aminoethanethiol (cysteamine) dioxygenase [Source:HGNC Symbol;Acc:HGNC:23506]	1.19607	0.604171	0.985267	16.8098	14.3813	0.225108
ENSG00000107815	C10orf2	chromosome 10 open reading frame 2 [Source:HGNC Symbol;Acc:HGNC:1160]	0.861408	0.435295	0.984705	7.11062	4.93584	0.526679
ENSG00000163611	SPICE1	spindle and centriole associated protein 1 [Source:HGNC Symbol;Acc:HGNC:25083]	1.22459	0.61884	0.984655	1.98324	2.7891	-0.491937
ENSG00000158292	GPR153	G protein-coupled receptor 153 [Source:HGNC Symbol;Acc:HGNC:23618]	1.51378	0.765113	0.984406	20.2592	9.98812	1.02029
ENSG00000011243	AKAP8L	A kinase (PRKA) anchor protein 8-like [Source:HGNC Symbol;Acc:HGNC:29857]	1.82174	0.920912	0.984179	30.1728	34.5982	-0.19745
ENSG00000033100	CHPF2	chondroitin polymerizing factor 2 [Source:HGNC Symbol;Acc:HGNC:29270]	1.04898	0.530398	0.983839	13.4997	6.49607	1.05529
ENSG00000177732	SOX12	SRY (sex determining region Y)-box 12 [Source:HGNC Symbol;Acc:HGNC:11198]	1.41915	0.71777	0.98343	38.6859	31.1799	0.311192
ENSG00000076826	CAMSAP3	calmodulin regulated spectrin-associated protein family, member 3 [Source:HGNC Symbol;Acc:HGNC:29307]	1.54996	0.784203	0.982929	30.9797	24.347	0.347579
ENSG00000140830	TXNL4B	thioredoxin-like 4B [Source:HGNC Symbol;Acc:HGNC:26041]	1.49135	0.754753	0.982544	8.09144	4.86129	0.735055
ENSG00000120278	PLEKHG1	pleckstrin homology domain containing, family G (with RhoGef domain) member 1 [Source:HGNC Symbol;Acc:HGNC:20884]	1.34846	0.682646	0.982099	4.47556	1.53509	1.54374
ENSG00000187556	NANOS3	nanos homolog 3 (Drosophila) [Source:HGNC Symbol;Acc:HGNC:22048]	1.28964	0.653685	0.980301	6.37454	1.0879	2.55078
ENSG00000110400	PVRL1	poliovirus receptor-related 1 (herpesvirus entry mediator C) [Source:HGNC Symbol;Acc:HGNC:9706]	1.55416	0.787787	0.980257	31.9011	17.366	0.877336
ENSG00000154479	CCDC173	coiled-coil domain containing 173 [Source:HGNC Symbol;Acc:HGNC:25064]	2.27465	1.1535	0.979625	0.964993	1.5544	-0.687771
ENSG00000095397	DFNB31	deafness, autosomal recessive 31 [Source:HGNC Symbol;Acc:HGNC:16361]	2.81519	1.42942	0.977802	8.91255	5.66712	0.653223
ENSG00000171448	ZBTB26	zinc finger and BTB domain containing 26 [Source:HGNC Symbol;Acc:HGNC:23383]	0.985551	0.501066	0.975931	6.28336	1.90896	1.71875
ENSG00000073536	NLE1	notchless homolog 1 (Drosophila) [Source:HGNC Symbol;Acc:HGNC:19889]	1.19924	0.609825	0.975649	8.68643	8.85539	-0.0277922
ENSG00000106012	IQCE	IQ motif containing E [Source:HGNC Symbol;Acc:HGNC:29171]	1.2746	0.648205	0.975518	15.8315	6.12627	1.36972
ENSG00000158805	ZNF276	zinc finger protein 276 [Source:HGNC Symbol;Acc:HGNC:23330]	1.11916	0.569869	0.973711	8.24597	6.45213	0.353913
ENSG00000133935	C14orf1	chromosome 14 open reading frame 1 [Source:HGNC Symbol;Acc:HGNC:1187]	1.7548	0.894109	0.972784	23.1833	23.5065	-0.0199734
ENSG00000210184	MT-TS2	mitochondrially encoded tRNA serine 2 (AGU/C) [Source:HGNC Symbol;Acc:HGNC:7498]	0.980373	0.499541	0.972729	39.9561	14.0161	1.51133
ENSG00000207611	MIR149	microRNA 149 [Source:HGNC Symbol;Acc:HGNC:31536]	0.453411	0.231041	0.972671	14.6853	4.02097	1.86876
ENSG00000174109	C16orf91	chromosome 16 open reading frame 91 [Source:HGNC Symbol;Acc:HGNC:27558]	0.936231	0.47785	0.970306	11.1433	8.47295	0.395246
ENSG00000107290	SETX	senataxin [Source:HGNC Symbol;Acc:HGNC:445]	1.35011	0.689106	0.970283	7.61886	8.58583	-0.172384
ENSG00000133275	CSNK1G2	casein kinase 1, gamma 2 [Source:HGNC Symbol;Acc:HGNC:2455]	2.28784	1.16784	0.970145	30.1787	58.4928	-0.954729
ENSG00000166526	ZNF3	zinc finger protein 3 [Source:HGNC Symbol;Acc:HGNC:13089]	0.567109	0.289506	0.970033	14.0714	1.82203	2.94914
ENSG00000198824	CHAMP1	chromosome alignment maintaining phosphoprotein 1 [Source:HGNC Symbol;Acc:HGNC:20311]	0.6939	0.354289	0.969802	20.324	16.9835	0.259049
ENSG00000198929	NOS1AP	nitric oxide synthase 1 (neuronal) adaptor protein [Source:HGNC Symbol;Acc:HGNC:16859]	1.54004	0.786438	0.969566	2.8043	9.44249	-1.75153
ENSG00000108239	TBC1D12	TBC1 domain family, member 12 [Source:HGNC Symbol;Acc:HGNC:29082]	1.4741	0.752915	0.969277	9.34669	7.76172	0.268079
ENSG00000204128	C2orf72	chromosome 2 open reading frame 72 [Source:HGNC Symbol;Acc:HGNC:27418]	0.855744	0.437191	0.968916	23.4822	8.06175	1.54241
ENSG00000052723	SIKE1	suppressor of IKBKE 1 [Source:HGNC Symbol;Acc:HGNC:26119]	1.3108	0.669937	0.968349	13.6917	9.98782	0.45506
ENSG00000142327	RNPEPL1	arginyl aminopeptidase (aminopeptidase B)-like 1 [Source:HGNC Symbol;Acc:HGNC:10079]	0.799786	0.408787	0.968265	5.57211	11.7252	-1.07332
ENSG00000181026	AEN	apoptosis enhancing nuclease [Source:HGNC Symbol;Acc:HGNC:25722]	1.71634	0.877447	0.967954	6.78957	10.7158	-0.658345
ENSG00000177706	FAM20C	family with sequence similarity 20, member C [Source:HGNC Symbol;Acc:HGNC:22140]	1.47977	0.75676	0.967468	25.8805	28.5009	-0.139144
ENSG00000166261	ZNF202	zinc finger protein 202 [Source:HGNC Symbol;Acc:HGNC:12994]	0.814437	0.416715	0.96674	8.25412	1.8877	2.12848
ENSG00000136802	LRRC8A	leucine rich repeat containing 8 family, member A [Source:HGNC Symbol;Acc:HGNC:19027]	2.18882	1.12013	0.966491	18.5159	2.31876	2.99733
ENSG00000214113	LYRM4	LYR motif containing 4 [Source:HGNC Symbol;Acc:HGNC:21365]	1.41959	0.726545	0.966347	2.73575	7.48603	-1.45226
ENSG00000099377	HSD3B7	hydroxy-delta-5-steroid dehydrogenase, 3 beta- and steroid delta-isomerase 7 [Source:HGNC Symbol;Acc:HGNC:18324]	3.03933	1.55562	0.966263	0.818707	1.32774	-0.697558
ENSG00000105821	DNAJC2	DnaJ (Hsp40) homolog, subfamily C, member 2 [Source:HGNC Symbol;Acc:HGNC:13192]	1.60194	0.820438	0.965353	8.62511	11.0075	-0.351867
ENSG00000104490	NCALD	neurocalcin delta [Source:HGNC Symbol;Acc:HGNC:7655]	1.81318	0.929135	0.964559	42.7375	114.849	-1.42617
ENSG00000144749	LRIG1	leucine-rich repeats and immunoglobulin-like domains 1 [Source:HGNC Symbol;Acc:HGNC:17360]	1.45895	0.747742	0.964317	41.208	9.3526	2.13949
ENSG00000178252	WDR6	WD repeat domain 6 [Source:HGNC Symbol;Acc:HGNC:12758]	1.09406	0.56125	0.96297	70.0627	114.065	-0.703136
ENSG00000213390	ARHGAP19	Rho GTPase activating protein 19 [Source:HGNC Symbol;Acc:HGNC:23724]	1.1913	0.611879	0.961214	1.8143	1.08063	0.747538
ENSG00000170265	ZNF282	zinc finger protein 282 [Source:HGNC Symbol;Acc:HGNC:13076]	0.90676	0.465867	0.960803	16.8546	11.925	0.49915
ENSG00000134532	SOX5	SRY (sex determining region Y)-box 5 [Source:HGNC Symbol;Acc:HGNC:11201]	1.37776	0.707953	0.960595	3.62844	6.66203	-0.876611
ENSG00000157734	SNX22	sorting nexin 22 [Source:HGNC Symbol;Acc:HGNC:16315]	0.601475	0.309093	0.960464	2.39993	3.77696	-0.654231
ENSG00000120519	SLC10A7	solute carrier family 10, member 7 [Source:HGNC Symbol;Acc:HGNC:23088]	1.14091	0.58687	0.959066	2.89326	1.41407	1.03284
ENSG00000141098	GFOD2	glucose-fructose oxidoreductase domain containing 2 [Source:HGNC Symbol;Acc:HGNC:28159]	1.512	0.778329	0.958002	18.6436	13.5978	0.455305
ENSG00000160877	NACC1	nucleus accumbens associated 1, BEN and BTB (POZ) domain containing [Source:HGNC Symbol;Acc:HGNC:20967]	1.66146	0.855466	0.957669	15.805	29.1058	-0.880923
ENSG00000144909	OSBPL11	oxysterol binding protein-like 11 [Source:HGNC Symbol;Acc:HGNC:16397]	1.72952	0.890693	0.957372	7.84328	8.80647	-0.167107
ENSG00000182150	ERCC6L2	excision repair cross-complementation group 6-like 2 [Source:HGNC Symbol;Acc:HGNC:26922]	0.864957	0.445579	0.956947	7.46909	3.97518	0.909911
ENSG00000131043	AAR2	AAR2 splicing factor homolog [Source:HGNC Symbol;Acc:HGNC:15886]	0.834738	0.430096	0.956664	21.3055	9.99714	1.09164
ENSG00000174529	TMEM81	transmembrane protein 81 [Source:HGNC Symbol;Acc:HGNC:32349]	1.30394	0.672166	0.955991	3.08482	0.860417	1.84208
ENSG00000158458	NRG2	neuregulin 2 [Source:HGNC Symbol;Acc:HGNC:7998]	1.29153	0.666906	0.95353	2.26008	2.89346	-0.356418
ENSG00000169193	CCDC126	coiled-coil domain containing 126 [Source:HGNC Symbol;Acc:HGNC:22398]	1.11056	0.573974	0.952229	5.00548	3.77813	0.405836
ENSG00000169155	ZBTB43	zinc finger and BTB domain containing 43 [Source:HGNC Symbol;Acc:HGNC:17908]	0.995577	0.514595	0.952097	5.80796	6.82164	-0.232087
ENSG00000134686	PHC2	polyhomeotic homolog 2 (Drosophila) [Source:HGNC Symbol;Acc:HGNC:3183]	1.0852	0.561672	0.950162	27.5457	19.5356	0.495726
ENSG00000103194	USP10	ubiquitin specific peptidase 10 [Source:HGNC Symbol;Acc:HGNC:12608]	1.42825	0.739524	0.94958	32.2879	22.559	0.517292
ENSG00000146540	C7orf50	chromosome 7 open reading frame 50 [Source:HGNC Symbol;Acc:HGNC:22421]	1.05534	0.546747	0.948758	22.2146	4.89045	2.18347
ENSG00000198915	RASGEF1A	RasGEF domain family, member 1A [Source:HGNC Symbol;Acc:HGNC:24246]	1.67274	0.8669	0.94828	1.79459	27.3693	-3.93083
ENSG00000120686	UFM1	ubiquitin-fold modifier 1 [Source:HGNC Symbol;Acc:HGNC:20597]	1.64372	0.85242	0.94733	35.6591	16.6858	1.09565
ENSG00000113734	BNIP1	BCL2/adenovirus E1B 19kDa interacting protein 1 [Source:HGNC Symbol;Acc:HGNC:1082]	1.11964	0.580833	0.946846	7.39527	5.77988	0.355561
ENSG00000122033	MTIF3	mitochondrial translational initiation factor 3 [Source:HGNC Symbol;Acc:HGNC:29788]	0.819871	0.425467	0.94635	21.3328	2.57564	3.05008
ENSG00000198908	BHLHB9	basic helix-loop-helix domain containing, class B, 9 [Source:HGNC Symbol;Acc:HGNC:29353]	2.22544	1.15509	0.94608	3.31653	39.0046	-3.5559
ENSG00000162972	C2orf47	chromosome 2 open reading frame 47 [Source:HGNC Symbol;Acc:HGNC:26198]	1.10064	0.571509	0.945495	8.83118	2.89271	1.61018
ENSG00000134851	TMEM165	transmembrane protein 165 [Source:HGNC Symbol;Acc:HGNC:30760]	1.53167	0.795715	0.94478	21.5608	24.606	-0.1906
ENSG00000268182	SMIM17	small integral membrane protein 17 [Source:HGNC Symbol;Acc:HGNC:27114]	1.00394	0.521591	0.944676	4.6173	4.14966	0.154057
ENSG00000149177	PTPRJ	protein tyrosine phosphatase, receptor type, J [Source:HGNC Symbol;Acc:HGNC:9673]	1.05445	0.547911	0.944472	6.33274	6.18403	0.0342818
ENSG00000188997	KCTD21	potassium channel tetramerization domain containing 21 [Source:HGNC Symbol;Acc:HGNC:27452]	0.777338	0.404134	0.943708	3.66067	3.97507	-0.118875
ENSG00000183060	LYSMD4	LysM, putative peptidoglycan-binding, domain containing 4 [Source:HGNC Symbol;Acc:HGNC:26571]	0.750459	0.390174	0.943656	9.74356	8.66497	0.169254
ENSG00000175414	ARL10	ADP-ribosylation factor-like 10 [Source:HGNC Symbol;Acc:HGNC:22042]	1.08438	0.563929	0.943286	13.1421	39.2637	-1.579
ENSG00000178761	FAM219B	family with sequence similarity 219, member B [Source:HGNC Symbol;Acc:HGNC:24695]	1.21418	0.631999	0.941985	7.4681	7.557	-0.0170718
ENSG00000106123	EPHB6	EPH receptor B6 [Source:HGNC Symbol;Acc:HGNC:3396]	1.03154	0.537102	0.941526	12.0314	35.9772	-1.58028
ENSG00000205250	E2F4	E2F transcription factor 4, p107/p130-binding [Source:HGNC Symbol;Acc:HGNC:3118]	1.02658	0.534704	0.941035	23.6043	17.2681	0.45094
ENSG00000102879	CORO1A	coronin, actin binding protein, 1A [Source:HGNC Symbol;Acc:HGNC:2252]	1.51201	0.78809	0.940039	15.8983	82.5911	-2.37712
ENSG00000163273	NPPC	natriuretic peptide C [Source:HGNC Symbol;Acc:HGNC:7941]	2.41041	1.25645	0.939931	2.49701	15.4036	-2.62499
ENSG00000134759	ELP2	elongator acetyltransferase complex subunit 2 [Source:HGNC Symbol;Acc:HGNC:18248]	1.24625	0.649674	0.939805	8.60934	41.0032	-2.25176
ENSG00000135249	RINT1	RAD50 interactor 1 [Source:HGNC Symbol;Acc:HGNC:21876]	1.05584	0.550572	0.939393	7.77248	4.53588	0.776991
ENSG00000145907	G3BP1	GTPase activating protein (SH3 domain) binding protein 1 [Source:HGNC Symbol;Acc:HGNC:30292]	1.35144	0.705493	0.937792	8.22639	16.6967	-1.02123
ENSG00000179456	ZBTB18	zinc finger and BTB domain containing 18 [Source:HGNC Symbol;Acc:HGNC:13030]	1.62454	0.848513	0.937019	11.9434	148.37	-3.63492
ENSG00000082515	MRPL22	mitochondrial ribosomal protein L22 [Source:HGNC Symbol;Acc:HGNC:14480]	1.33999	0.699892	0.937016	4.59712	19.8248	-2.1085
ENSG00000166797	FAM96A	family with sequence similarity 96, member A [Source:HGNC Symbol;Acc:HGNC:26235]	1.02066	0.533338	0.936386	10.3619	11.8809	-0.197358
ENSG00000115942	ORC2	origin recognition complex, subunit 2 [Source:HGNC Symbol;Acc:HGNC:8488]	1.10318	0.577155	0.934642	4.37239	5.2253	-0.257091
ENSG00000109220	CHIC2	cysteine-rich hydrophobic domain 2 [Source:HGNC Symbol;Acc:HGNC:1935]	2.15155	1.12613	0.934009	7.18035	2.87889	1.31854
ENSG00000165300	SLITRK5	SLIT and NTRK-like family, member 5 [Source:HGNC Symbol;Acc:HGNC:20295]	0.717459	0.375628	0.933593	4.08547	19.7842	-2.27578
ENSG00000163781	TOPBP1	topoisomerase (DNA) II binding protein 1 [Source:HGNC Symbol;Acc:HGNC:17008]	1.54294	0.807902	0.933434	15.1725	8.00598	0.922311
ENSG00000141030	COPS3	COP9 signalosome subunit 3 [Source:HGNC Symbol;Acc:HGNC:2239]	1.37193	0.718668	0.932807	43.4567	26.1591	0.732265
ENSG00000183161	FANCF	Fanconi anemia, complementation group F [Source:HGNC Symbol;Acc:HGNC:3587]	0.519008	0.271916	0.932597	6.61609	2.64217	1.32426
ENSG00000170037	CNTROB	centrobin, centrosomal BRCA2 interacting protein [Source:HGNC Symbol;Acc:HGNC:29616]	1.64715	0.863475	0.931746	14.0615	5.07744	1.46958
ENSG00000100926	TM9SF1	transmembrane 9 superfamily member 1 [Source:HGNC Symbol;Acc:HGNC:11864]	1.36468	0.715556	0.93143	2.65317	13.0608	-2.29945
ENSG00000133657	ATP13A3	ATPase type 13A3 [Source:HGNC Symbol;Acc:HGNC:24113]	1.75841	0.922242	0.931053	14.4204	16.035	-0.153111
ENSG00000104228	TRIM35	tripartite motif containing 35 [Source:HGNC Symbol;Acc:HGNC:16285]	1.43997	0.755848	0.929866	7.52046	91.0317	-3.59748
ENSG00000115946	PNO1	partner of NOB1 homolog [Source:HGNC Symbol;Acc:HGNC:32790]	1.36774	0.71804	0.929658	8.64357	19.1497	-1.14762
ENSG00000151092	NGLY1	N-glycanase 1 [Source:HGNC Symbol;Acc:HGNC:17646]	1.21233	0.636565	0.929397	9.78547	5.86219	0.739201
ENSG00000116863	ADPRHL2	ADP-ribosylhydrolase like 2 [Source:HGNC Symbol;Acc:HGNC:21304]	0.979891	0.514825	0.92854	28.5868	15.5189	0.881327
ENSG00000203877	RIPPLY2	ripply transcriptional repressor 2 [Source:HGNC Symbol;Acc:HGNC:21390]	1.23818	0.650554	0.928477	5.85529	3.83283	0.611331
ENSG00000170113	NIPA1	non imprinted in Prader-Willi/Angelman syndrome 1 [Source:HGNC Symbol;Acc:HGNC:17043]	1.48855	0.782407	0.927918	13.2637	22.144	-0.739435
ENSG00000109171	SLAIN2	SLAIN motif family, member 2 [Source:HGNC Symbol;Acc:HGNC:29282]	1.79501	0.943897	0.927291	8.92872	11.9388	-0.419136
ENSG00000205476	CCDC85C	coiled-coil domain containing 85C [Source:HGNC Symbol;Acc:HGNC:35459]	1.4283	0.751101	0.927219	3.56704	21.7211	-2.6063
ENSG00000094880	CDC23	cell division cycle 23 [Source:HGNC Symbol;Acc:HGNC:1724]	1.07346	0.564635	0.926875	13.0804	19.051	-0.542463
ENSG00000188763	FZD9	frizzled class receptor 9 [Source:HGNC Symbol;Acc:HGNC:4047]	1.06891	0.56255	0.926091	2.91588	6.23321	-1.09605
ENSG00000101343	CRNKL1	crooked neck pre-mRNA splicing factor 1 [Source:HGNC Symbol;Acc:HGNC:15762]	1.10863	0.583468	0.926048	8.17192	6.3388	0.366465
ENSG00000088256	GNA11	guanine nucleotide binding protein (G protein), alpha 11 (Gq class) [Source:HGNC Symbol;Acc:HGNC:4379]	1.65807	0.87354	0.924558	28.9394	54.6396	-0.916912
ENSG00000165023	DIRAS2	DIRAS family, GTP-binding RAS-like 2 [Source:HGNC Symbol;Acc:HGNC:19323]	0.932097	0.491293	0.923896	32.4522	76.7925	-1.24265
ENSG00000136830	FAM129B	family with sequence similarity 129, member B [Source:HGNC Symbol;Acc:HGNC:25282]	1.16684	0.615151	0.92359	10.6555	17.082	-0.680879
ENSG00000158941	CCAR2	cell cycle and apoptosis regulator 2 [Source:HGNC Symbol;Acc:HGNC:23360]	1.08166	0.570848	0.922075	32.7466	31.7538	0.0444157
ENSG00000155545	MIER3	mesoderm induction early response 1, family member 3 [Source:HGNC Symbol;Acc:HGNC:26678]	1.06708	0.563163	0.922046	7.98387	4.56933	0.805107
ENSG00000116685	KIAA2013	KIAA2013 [Source:HGNC Symbol;Acc:HGNC:28513]	1.18735	0.626933	0.921359	12.6131	17.5986	-0.480538
ENSG00000179148	ALOXE3	arachidonate lipoxygenase 3 [Source:HGNC Symbol;Acc:HGNC:13743]	4.27779	2.25957	0.920818	0.676195	0.686459	-0.0217337
ENSG00000175155	YPEL2	yippee-like 2 [Source:HGNC Symbol;Acc:HGNC:18326]	1.65896	0.876542	0.920382	3.46965	2.56576	0.435405
ENSG00000066697	MSANTD3	Myb/SANT-like DNA-binding domain containing 3 [Source:HGNC Symbol;Acc:HGNC:23370]	1.69703	0.896788	0.920174	23.1848	11.6904	0.987855
ENSG00000065559	MAP2K4	mitogen-activated protein kinase kinase 4 [Source:HGNC Symbol;Acc:HGNC:6844]	1.62601	0.859331	0.920053	24.1582	63.4601	-1.39333
ENSG00000266524	GDF10	growth differentiation factor 10 [Source:HGNC Symbol;Acc:HGNC:4215]	1.33634	0.706316	0.919905	1.64433	7.1962	-2.12974
ENSG00000173473	SMARCC1	SWI/SNF related, matrix associated, actin dependent regulator of chromatin, subfamily c, member 1 [Source:HGNC Symbol;Acc:HGNC:11104]	1.36781	0.724125	0.917562	12.5369	23.2714	-0.892376
ENSG00000163607	GTPBP8	GTP-binding protein 8 (putative) [Source:HGNC Symbol;Acc:HGNC:25007]	1.34255	0.710985	0.91708	6.93664	9.21578	-0.409869
ENSG00000125354	2006-09-01	septin 6 [Source:HGNC Symbol;Acc:HGNC:15848]	1.42898	0.75691	0.916787	27.0008	31.4779	-0.221337
ENSG00000024048	UBR2	ubiquitin protein ligase E3 component n-recognin 2 [Source:HGNC Symbol;Acc:HGNC:21289]	0.859252	0.455217	0.916528	7.26955	12.0469	-0.728723
ENSG00000099904	ZDHHC8	zinc finger, DHHC-type containing 8 [Source:HGNC Symbol;Acc:HGNC:18474]	1.18527	0.628168	0.915998	13.2181	26.7486	-1.01695
ENSG00000125484	GTF3C4	general transcription factor IIIC, polypeptide 4, 90kDa [Source:HGNC Symbol;Acc:HGNC:4667]	1.11983	0.593592	0.915731	11.9248	10.4596	0.189142
ENSG00000150967	ABCB9	ATP-binding cassette, sub-family B (MDR/TAP), member 9 [Source:HGNC Symbol;Acc:HGNC:50]	0.955504	0.506897	0.91457	4.27716	10.0409	-1.23117
ENSG00000132613	MTSS1L	metastasis suppressor 1-like [Source:HGNC Symbol;Acc:HGNC:25094]	1.97681	1.04879	0.914442	16.755	79.4683	-2.24579
ENSG00000197879	MYO1C	myosin IC [Source:HGNC Symbol;Acc:HGNC:7597]	1.40386	0.744909	0.914263	5.0327	7.60671	-0.595939
ENSG00000011198	ABHD5	abhydrolase domain containing 5 [Source:HGNC Symbol;Acc:HGNC:21396]	1.3714	0.727726	0.914179	7.70866	9.63194	-0.321346
ENSG00000173230	GOLGB1	golgin B1 [Source:HGNC Symbol;Acc:HGNC:4429]	1.22414	0.649746	0.913822	14.6323	8.74498	0.742627
ENSG00000181220	ZNF746	zinc finger protein 746 [Source:HGNC Symbol;Acc:HGNC:21948]	0.892446	0.47401	0.912848	7.13043	8.92695	-0.324179
ENSG00000114541	FRMD4B	FERM domain containing 4B [Source:HGNC Symbol;Acc:HGNC:24886]	1.42298	0.756275	0.911931	4.89094	2.16324	1.17692
ENSG00000137656	BUD13	BUD13 homolog [Source:HGNC Symbol;Acc:HGNC:28199]	0.929199	0.493857	0.911893	9.278	2.8344	1.71077
ENSG00000196872	KIAA1211L	KIAA1211-like [Source:HGNC Symbol;Acc:HGNC:33454]	1.65398	0.879159	0.911743	0.431076	14.2244	-5.04429
ENSG00000272886	DCP1A	decapping mRNA 1A [Source:HGNC Symbol;Acc:HGNC:18714]	1.18134	0.627979	0.911635	7.25112	4.17512	0.796386
ENSG00000166455	C16orf46	chromosome 16 open reading frame 46 [Source:HGNC Symbol;Acc:HGNC:26525]	1.27795	0.679478	0.91133	2.85039	3.86169	-0.438074
ENSG00000089737	DDX24	DEAD (Asp-Glu-Ala-Asp) box helicase 24 [Source:HGNC Symbol;Acc:HGNC:13266]	1.40514	0.747561	0.910451	58.8802	43.1783	0.447477
ENSG00000213088	ACKR1	atypical chemokine receptor 1 (Duffy blood group) [Source:HGNC Symbol;Acc:HGNC:4035]	1.77447	0.944234	0.910175	10.9203	46.7846	-2.09902
ENSG00000168014	C2CD3	C2 calcium-dependent domain containing 3 [Source:HGNC Symbol;Acc:HGNC:24564]	1.08367	0.576651	0.910155	5.48702	2.78898	0.976284
ENSG00000179454	KLHL28	kelch-like family member 28 [Source:HGNC Symbol;Acc:HGNC:19741]	0.925599	0.49271	0.909649	4.81541	7.06019	-0.55205
ENSG00000168993	CPLX1	complexin 1 [Source:HGNC Symbol;Acc:HGNC:2309]	1.72025	0.916083	0.909069	13.0877	180.811	-3.78819
ENSG00000184156	KCNQ3	potassium channel, voltage gated KQT-like subfamily Q, member 3 [Source:HGNC Symbol;Acc:HGNC:6297]	1.87073	0.996496	0.908663	4.99563	23.4608	-2.23151
ENSG00000164897	TMUB1	transmembrane and ubiquitin-like domain containing 1 [Source:HGNC Symbol;Acc:HGNC:21709]	2.55005	1.35985	0.907074	17.298	15.736	0.136536
ENSG00000105298	CACTIN	cactin, spliceosome C complex subunit [Source:HGNC Symbol;Acc:HGNC:29938]	1.10022	0.586737	0.907001	8.42189	11.0072	-0.386236
ENSG00000123395	ATG101	autophagy related 101 [Source:HGNC Symbol;Acc:HGNC:25679]	2.70404	1.44206	0.906984	14.0168	27.5678	-0.975826
ENSG00000163812	ZDHHC3	zinc finger, DHHC-type containing 3 [Source:HGNC Symbol;Acc:HGNC:18470]	1.64593	0.878269	0.90617	20.4829	17.094	0.260929
ENSG00000158796	DEDD	death effector domain containing [Source:HGNC Symbol;Acc:HGNC:2755]	1.5226	0.812839	0.905499	19.9723	3.54061	2.49593
ENSG00000157881	PANK4	pantothenate kinase 4 [Source:HGNC Symbol;Acc:HGNC:19366]	1.29652	0.692286	0.905202	15.8891	11.4557	0.471974
ENSG00000111358	GTF2H3	general transcription factor IIH, polypeptide 3, 34kDa [Source:HGNC Symbol;Acc:HGNC:4657]	0.454892	0.242978	0.904699	10.717	6.74525	0.667963
ENSG00000076650	GPATCH1	G patch domain containing 1 [Source:HGNC Symbol;Acc:HGNC:24658]	0.558224	0.298476	0.90323	6.50508	7.85158	-0.271418
ENSG00000004478	FKBP4	FK506 binding protein 4, 59kDa [Source:HGNC Symbol;Acc:HGNC:3720]	1.57532	0.842736	0.90249	32.9285	58.821	-0.836995
ENSG00000120992	LYPLA1	lysophospholipase I [Source:HGNC Symbol;Acc:HGNC:6737]	1.01976	0.545733	0.901967	20.2209	3.76444	2.42534
ENSG00000100124	ANKRD54	ankyrin repeat domain 54 [Source:HGNC Symbol;Acc:HGNC:25185]	1.51533	0.811577	0.900829	22.0178	8.30356	1.40687
ENSG00000169972	PUSL1	pseudouridylate synthase-like 1 [Source:HGNC Symbol;Acc:HGNC:26914]	1.65096	0.884464	0.900427	6.53816	21.453	-1.71422
ENSG00000198719	DLL1	delta-like 1 (Drosophila) [Source:HGNC Symbol;Acc:HGNC:2908]	0.939616	0.503492	0.900102	15.3318	3.29914	2.21636
ENSG00000135454	B4GALNT1	beta-1,4-N-acetyl-galactosaminyl transferase 1 [Source:HGNC Symbol;Acc:HGNC:4117]	1.25686	0.673593	0.899877	22.6301	55.3006	-1.28906
ENSG00000160959	LRRC14	leucine rich repeat containing 14 [Source:HGNC Symbol;Acc:HGNC:20419]	0.959062	0.514066	0.89967	9.4283	6.06898	0.635543
ENSG00000171016	PYGO1	pygopus family PHD finger 1 [Source:HGNC Symbol;Acc:HGNC:30256]	1.19031	0.638489	0.898603	6.8364	6.42074	0.0904964
ENSG00000047365	ARAP2	ArfGAP with RhoGAP domain, ankyrin repeat and PH domain 2 [Source:HGNC Symbol;Acc:HGNC:16924]	1.97404	1.05905	0.898383	1.03905	7.79424	-2.90714
ENSG00000156381	ANKRD9	ankyrin repeat domain 9 [Source:HGNC Symbol;Acc:HGNC:20096]	2.07627	1.11432	0.897831	4.27587	2.05294	1.05853
ENSG00000008735	MAPK8IP2	mitogen-activated protein kinase 8 interacting protein 2 [Source:HGNC Symbol;Acc:HGNC:6883]	1.11231	0.59767	0.896135	47.3281	56.6127	-0.258429
ENSG00000090054	SPTLC1	serine palmitoyltransferase, long chain base subunit 1 [Source:HGNC Symbol;Acc:HGNC:11277]	1.05928	0.569254	0.895942	19.6683	9.94745	0.983475
ENSG00000104714	ERICH1	glutamate-rich 1 [Source:HGNC Symbol;Acc:HGNC:27234]	0.91583	0.492179	0.895895	3.37208	4.15923	-0.302678
ENSG00000171960	PPIH	peptidylprolyl isomerase H (cyclophilin H) [Source:HGNC Symbol;Acc:HGNC:14651]	1.33961	0.71995	0.895847	24.728	7.33168	1.75393
ENSG00000086589	RBM22	RNA binding motif protein 22 [Source:HGNC Symbol;Acc:HGNC:25503]	1.28314	0.689658	0.895726	32.0485	12.9552	1.30673
ENSG00000171421	MRPL36	mitochondrial ribosomal protein L36 [Source:HGNC Symbol;Acc:HGNC:14490]	1.09608	0.589302	0.895272	19.1429	17.4106	0.136842
ENSG00000186007	LEMD1	LEM domain containing 1 [Source:HGNC Symbol;Acc:HGNC:18725]	1.27917	0.687801	0.895138	8.83853	1.269	2.80012
ENSG00000166006	KCNC2	potassium channel, voltage gated Shaw related subfamily C, member 2 [Source:HGNC Symbol;Acc:HGNC:6234]	1.4687	0.789833	0.894922	1.52005	7.9498	-2.38679
ENSG00000197106	SLC6A17	solute carrier family 6 (neutral amino acid transporter), member 17 [Source:HGNC Symbol;Acc:HGNC:31399]	3.51171	1.88934	0.894291	9.30205	65.1152	-2.80737
ENSG00000102572	STK24	serine/threonine kinase 24 [Source:HGNC Symbol;Acc:HGNC:11403]	1.38504	0.745519	0.893611	4.54141	14.262	-1.65096
ENSG00000133059	DSTYK	dual serine/threonine and tyrosine protein kinase [Source:HGNC Symbol;Acc:HGNC:29043]	1.46209	0.787139	0.893338	8.03827	6.81109	0.238998
ENSG00000110047	EHD1	EH-domain containing 1 [Source:HGNC Symbol;Acc:HGNC:3242]	2.0888	1.12458	0.893291	15.9823	31.1209	-0.961407
ENSG00000228672	PROB1	proline-rich basic protein 1 [Source:HGNC Symbol;Acc:HGNC:41906]	1.03062	0.555075	0.892757	0.66227	1.63528	-1.30405
ENSG00000065600	TMEM206	transmembrane protein 206 [Source:HGNC Symbol;Acc:HGNC:25593]	1.03336	0.556803	0.892099	12.4021	7.10337	0.80401
ENSG00000204439	C6orf47	chromosome 6 open reading frame 47 [Source:HGNC Symbol;Acc:HGNC:19076]	0.814779	0.439061	0.891987	5.78116	4.00602	0.529189
ENSG00000162302	RPS6KA4	ribosomal protein S6 kinase, 90kDa, polypeptide 4 [Source:HGNC Symbol;Acc:HGNC:10433]	1.07025	0.576839	0.891708	7.31211	7.91477	-0.114259
ENSG00000113716	HMGXB3	HMG box domain containing 3 [Source:HGNC Symbol;Acc:HGNC:28982]	0.921521	0.496781	0.891407	11.3923	9.54855	0.254702
ENSG00000134644	PUM1	pumilio RNA-binding family member 1 [Source:HGNC Symbol;Acc:HGNC:14957]	1.21855	0.657203	0.89075	39.7776	28.8997	0.460903
ENSG00000144747	TMF1	TATA element modulatory factor 1 [Source:HGNC Symbol;Acc:HGNC:11870]	1.65345	0.892618	0.88936	7.54672	6.59679	0.194085
ENSG00000137947	GTF2B	general transcription factor IIB [Source:HGNC Symbol;Acc:HGNC:4648]	1.12292	0.606212	0.889359	22.4214	8.3213	1.42999
ENSG00000166979	EVA1C	eva-1 homolog C (C. elegans) [Source:HGNC Symbol;Acc:HGNC:13239]	2.38426	1.2888	0.887513	1.33136	0.519908	1.35657
ENSG00000168243	GNG4	guanine nucleotide binding protein (G protein), gamma 4 [Source:HGNC Symbol;Acc:HGNC:4407]	1.80807	0.977351	0.887501	37.31	46.333	-0.312479
ENSG00000144580	RQCD1	RCD1 required for cell differentiation1 homolog (S. pombe) [Source:HGNC Symbol;Acc:HGNC:10445]	0.991599	0.536122	0.887196	15.4597	17.0855	-0.144256
ENSG00000128011	LRFN1	leucine rich repeat and fibronectin type III domain containing 1 [Source:HGNC Symbol;Acc:HGNC:29290]	1.35583	0.733442	0.88642	9.57942	41.3742	-2.11072
ENSG00000198730	CTR9	CTR9 homolog, Paf1/RNA polymerase II complex component [Source:HGNC Symbol;Acc:HGNC:16850]	1.25341	0.678448	0.885544	17.9584	27.083	-0.592732
ENSG00000258947	TUBB3	tubulin, beta 3 class III [Source:HGNC Symbol;Acc:HGNC:20772]	0.921073	0.498753	0.884991	28.3114	878.769	-4.95603
ENSG00000136522	MRPL47	mitochondrial ribosomal protein L47 [Source:HGNC Symbol;Acc:HGNC:16652]	1.30331	0.705769	0.884909	23.2745	4.44474	2.38858
ENSG00000179918	SEPHS2	selenophosphate synthetase 2 [Source:HGNC Symbol;Acc:HGNC:19686]	0.733322	0.39726	0.884365	25.2617	28.3224	-0.164991
ENSG00000122335	SERAC1	serine active site containing 1 [Source:HGNC Symbol;Acc:HGNC:21061]	1.44165	0.781292	0.883783	4.54631	4.87139	-0.0996354
ENSG00000135541	AHI1	Abelson helper integration site 1 [Source:HGNC Symbol;Acc:HGNC:21575]	1.95916	1.06229	0.88306	11.0054	39.0736	-1.82799
ENSG00000103888	CEMIP	cell migration inducing protein, hyaluronan binding [Source:HGNC Symbol;Acc:HGNC:29213]	1.53078	0.83005	0.882997	0.524985	8.97593	-4.09571
ENSG00000164164	OTUD4	OTU deubiquitinase 4 [Source:HGNC Symbol;Acc:HGNC:24949]	1.59446	0.864637	0.882898	6.87393	11.1639	-0.699629
ENSG00000117395	EBNA1BP2	EBNA1 binding protein 2 [Source:HGNC Symbol;Acc:HGNC:15531]	1.27716	0.693926	0.880091	34.9223	21.2109	0.719341
ENSG00000176428	VPS37D	vacuolar protein sorting 37 homolog D (S. cerevisiae) [Source:HGNC Symbol;Acc:HGNC:18287]	1.56857	0.852891	0.87902	23.2821	25.1271	-0.110022
ENSG00000126464	PRR12	proline rich 12 [Source:HGNC Symbol;Acc:HGNC:29217]	0.77055	0.419064	0.878719	19.4876	15.8947	0.294006
ENSG00000182836	PLCXD3	phosphatidylinositol-specific phospholipase C, X domain containing 3 [Source:HGNC Symbol;Acc:HGNC:31822]	0.876151	0.476509	0.878676	1.29183	1.91604	-0.568715
ENSG00000153933	DGKE	diacylglycerol kinase, epsilon 64kDa [Source:HGNC Symbol;Acc:HGNC:2852]	1.00211	0.545191	0.878202	4.49978	8.92183	-0.987485
ENSG00000137267	TUBB2A	tubulin, beta 2A class IIa [Source:HGNC Symbol;Acc:HGNC:12412]	1.27263	0.692544	0.877841	289.389	878.306	-1.60171
ENSG00000135144	DTX1	deltex 1, E3 ubiquitin ligase [Source:HGNC Symbol;Acc:HGNC:3060]	1.30556	0.710951	0.876843	37.3036	38.8854	-0.0599162
ENSG00000174516	PELI3	pellino E3 ubiquitin protein ligase family member 3 [Source:HGNC Symbol;Acc:HGNC:30010]	1.15767	0.630581	0.876468	9.90356	5.60733	0.820634
ENSG00000198265	HELZ	helicase with zinc finger [Source:HGNC Symbol;Acc:HGNC:16878]	1.32846	0.723881	0.875925	5.42725	3.90917	0.473358
ENSG00000103353	UBFD1	ubiquitin family domain containing 1 [Source:HGNC Symbol;Acc:HGNC:30565]	1.35547	0.738808	0.875518	38.2646	22.2844	0.779974
ENSG00000168495	POLR3D	polymerase (RNA) III (DNA directed) polypeptide D, 44kDa [Source:HGNC Symbol;Acc:HGNC:1080]	1.14966	0.627044	0.874566	4.85373	14.585	-1.58732
ENSG00000135930	EIF4E2	eukaryotic translation initiation factor 4E family member 2 [Source:HGNC Symbol;Acc:HGNC:3293]	1.33315	0.727141	0.87453	17.157	26.0103	-0.600283
ENSG00000198727	MT-CYB	mitochondrially encoded cytochrome b [Source:HGNC Symbol;Acc:HGNC:7427]	1.24002	0.6766	0.873982	2805.38	3550.73	-0.339918
ENSG00000062582	MRPS24	mitochondrial ribosomal protein S24 [Source:HGNC Symbol;Acc:HGNC:14510]	1.83297	1.00018	0.873916	0.886804	32.7786	-5.208
ENSG00000185716	C16orf52	chromosome 16 open reading frame 52 [Source:HGNC Symbol;Acc:HGNC:27087]	1.52175	0.830536	0.873617	9.34827	12.2247	-0.387027
ENSG00000115808	STRN	striatin, calmodulin binding protein [Source:HGNC Symbol;Acc:HGNC:11424]	1.49457	0.815786	0.87347	5.38113	9.7448	-0.856724
ENSG00000119508	NR4A3	nuclear receptor subfamily 4, group A, member 3 [Source:HGNC Symbol;Acc:HGNC:7982]	18.0561	9.85874	0.87301	0.991942	21.1381	-4.41345
ENSG00000198380	GFPT1	glutamine--fructose-6-phosphate transaminase 1 [Source:HGNC Symbol;Acc:HGNC:4241]	1.68396	0.92016	0.871898	15.0891	15.6499	-0.0526494
ENSG00000144597	EAF1	ELL associated factor 1 [Source:HGNC Symbol;Acc:HGNC:20907]	1.56181	0.853507	0.87174	8.85972	4.34257	1.02871
ENSG00000128266	GNAZ	guanine nucleotide binding protein (G protein), alpha z polypeptide [Source:HGNC Symbol;Acc:HGNC:4395]	1.54921	0.846678	0.871645	36.0447	43.1442	-0.259379
ENSG00000169752	NRG4	neuregulin 4 [Source:HGNC Symbol;Acc:HGNC:29862]	0.844312	0.461513	0.871405	0.626781	0.923327	-0.55888
ENSG00000205090	TMEM240	transmembrane protein 240 [Source:HGNC Symbol;Acc:HGNC:25186]	1.29772	0.709572	0.870959	20.4005	10.0229	1.0253
ENSG00000063169	GLTSCR1	glioma tumor suppressor candidate region gene 1 [Source:HGNC Symbol;Acc:HGNC:4332]	1.20289	0.657734	0.870928	7.75006	5.94974	0.381381
ENSG00000160785	SLC25A44	solute carrier family 25, member 44 [Source:HGNC Symbol;Acc:HGNC:29036]	1.61304	0.882466	0.870171	14.5061	25.5608	-0.817269
ENSG00000163848	ZNF148	zinc finger protein 148 [Source:HGNC Symbol;Acc:HGNC:12933]	1.17033	0.640323	0.870039	7.16509	11.0244	-0.621645
ENSG00000111596	CNOT2	CCR4-NOT transcription complex, subunit 2 [Source:HGNC Symbol;Acc:HGNC:7878]	1.57249	0.860362	0.870034	14.6844	17.9907	-0.292969
ENSG00000101574	METTL4	methyltransferase like 4 [Source:HGNC Symbol;Acc:HGNC:24726]	1.0739	0.587596	0.869958	2.11628	3.89909	-0.881609
ENSG00000171992	SYNPO	synaptopodin [Source:HGNC Symbol;Acc:HGNC:30672]	0.945066	0.517527	0.868781	1.14504	11.5897	-3.33937
ENSG00000168612	ZSWIM1	zinc finger, SWIM-type containing 1 [Source:HGNC Symbol;Acc:HGNC:16155]	0.566466	0.310272	0.868453	5.11676	7.78329	-0.605148
ENSG00000175893	ZDHHC21	zinc finger, DHHC-type containing 21 [Source:HGNC Symbol;Acc:HGNC:20750]	1.07407	0.588603	0.867722	7.24192	9.01142	-0.315382
ENSG00000173404	INSM1	insulinoma-associated 1 [Source:HGNC Symbol;Acc:HGNC:6090]	1.61279	0.884127	0.867234	8.96363	4.03598	1.15116
ENSG00000196968	FUT11	fucosyltransferase 11 (alpha (1,3) fucosyltransferase) [Source:HGNC Symbol;Acc:HGNC:19233]	1.7498	0.959448	0.866917	9.36984	9.24737	0.0189817
ENSG00000176542	KIAA2018	KIAA2018 [Source:HGNC Symbol;Acc:HGNC:30494]	1.19402	0.655	0.866255	2.46753	4.16182	-0.754149
ENSG00000198786	MT-ND5	mitochondrially encoded NADH dehydrogenase 5 [Source:HGNC Symbol;Acc:HGNC:7461]	0.985265	0.540532	0.866133	2300.43	1599.91	0.523909
ENSG00000158691	ZSCAN12	zinc finger and SCAN domain containing 12 [Source:HGNC Symbol;Acc:HGNC:13172]	1.10792	0.607877	0.866008	3.62263	2.68447	0.432399
ENSG00000100142	POLR2F	polymerase (RNA) II (DNA directed) polypeptide F [Source:HGNC Symbol;Acc:HGNC:9193]	1.95058	1.07062	0.865451	1.21029	67.6339	-5.80432
ENSG00000136052	SLC41A2	solute carrier family 41 (magnesium transporter), member 2 [Source:HGNC Symbol;Acc:HGNC:31045]	1.14783	0.630287	0.864834	5.34727	9.91046	-0.89015
ENSG00000072274	TFRC	transferrin receptor [Source:HGNC Symbol;Acc:HGNC:11763]	2.33347	1.28135	0.864816	12.3166	82.9178	-2.75108
ENSG00000129317	PUS7L	pseudouridylate synthase 7-like [Source:HGNC Symbol;Acc:HGNC:25276]	0.536282	0.294523	0.864611	1.71654	1.49872	0.195778
ENSG00000141458	NPC1	Niemann-Pick disease, type C1 [Source:HGNC Symbol;Acc:HGNC:7897]	1.75273	0.96265	0.864518	5.49306	7.23077	-0.396538
ENSG00000196453	ZNF777	zinc finger protein 777 [Source:HGNC Symbol;Acc:HGNC:22213]	0.840082	0.461431	0.864414	12.8408	13.9956	-0.124234
ENSG00000152382	TADA1	transcriptional adaptor 1 [Source:HGNC Symbol;Acc:HGNC:30631]	0.882876	0.485107	0.863909	19.0859	12.6903	0.588778
ENSG00000117155	SSX2IP	synovial sarcoma, X breakpoint 2 interacting protein [Source:HGNC Symbol;Acc:HGNC:16509]	1.7727	0.974463	0.863271	4.91777	36.4275	-2.88895
ENSG00000119922	IFIT2	interferon-induced protein with tetratricopeptide repeats 2 [Source:HGNC Symbol;Acc:HGNC:5409]	1.41233	0.776737	0.862581	2.09792	1.77219	0.243422
ENSG00000103126	AXIN1	axin 1 [Source:HGNC Symbol;Acc:HGNC:903]	2.15225	1.18384	0.86238	7.34792	8.63079	-0.232157
ENSG00000198763	MT-ND2	mitochondrially encoded NADH dehydrogenase 2 [Source:HGNC Symbol;Acc:HGNC:7456]	1.17253	0.645045	0.862148	2429.03	2099.88	0.210074
ENSG00000110395	CBL	Cbl proto-oncogene, E3 ubiquitin protein ligase [Source:HGNC Symbol;Acc:HGNC:1541]	1.97896	1.08939	0.861217	6.76729	7.95693	-0.233633
ENSG00000153310	FAM49B	family with sequence similarity 49, member B [Source:HGNC Symbol;Acc:HGNC:25216]	1.26288	0.695269	0.861075	28.4508	74.2722	-1.38435
ENSG00000116604	MEF2D	myocyte enhancer factor 2D [Source:HGNC Symbol;Acc:HGNC:6997]	3.12316	1.7195	0.861016	7.96586	39.1488	-2.29707
ENSG00000123095	BHLHE41	basic helix-loop-helix family, member e41 [Source:HGNC Symbol;Acc:HGNC:16617]	1.56034	0.859155	0.860871	5.0779	1.08797	2.22259
ENSG00000165868	HSPA12A	heat shock 70kDa protein 12A [Source:HGNC Symbol;Acc:HGNC:19022]	1.36939	0.754154	0.860605	16.9082	36.7248	-1.11904
ENSG00000104164	BLOC1S6	biogenesis of lysosomal organelles complex-1, subunit 6, pallidin [Source:HGNC Symbol;Acc:HGNC:8549]	1.54299	0.84977	0.860585	32.579	31.0655	0.0686319
ENSG00000140157	NIPA2	non imprinted in Prader-Willi/Angelman syndrome 2 [Source:HGNC Symbol;Acc:HGNC:17044]	1.73932	0.958237	0.860072	14.7611	13.5516	0.123328
ENSG00000206053	HN1L	hematological and neurological expressed 1-like [Source:HGNC Symbol;Acc:HGNC:14137]	1.30973	0.721872	0.859452	13.2421	5.43084	1.28589
ENSG00000151332	MBIP	MAP3K12 binding inhibitory protein 1 [Source:HGNC Symbol;Acc:HGNC:20427]	1.3146	0.724575	0.859415	13.4549	6.80762	0.98291
ENSG00000144401	METTL21A	methyltransferase like 21A [Source:HGNC Symbol;Acc:HGNC:30476]	1.03208	0.568957	0.859169	2.90459	2.63666	0.139621
ENSG00000197852	FAM212B	family with sequence similarity 212, member B [Source:HGNC Symbol;Acc:HGNC:28045]	1.44663	0.798042	0.858163	6.65935	2.76852	1.26627
ENSG00000165775	FUNDC2	FUN14 domain containing 2 [Source:HGNC Symbol;Acc:HGNC:24925]	1.71646	0.946904	0.858144	5.93959	11.6601	-0.973141
ENSG00000166974	MAPRE2	microtubule-associated protein, RP/EB family, member 2 [Source:HGNC Symbol;Acc:HGNC:6891]	1.91738	1.05782	0.858038	73.5458	171.705	-1.22322
ENSG00000167523	SPATA33	spermatogenesis associated 33 [Source:HGNC Symbol;Acc:HGNC:26463]	1.31958	0.728021	0.858032	6.56916	2.66956	1.29911
ENSG00000077463	SIRT6	sirtuin 6 [Source:HGNC Symbol;Acc:HGNC:14934]	1.16861	0.644831	0.8578	19.8502	13.4778	0.558567
ENSG00000197183	NOL4L	nucleolar protein 4-like [Source:HGNC Symbol;Acc:HGNC:16106]	1.29795	0.716257	0.857688	30.3249	20.1364	0.590698
ENSG00000144847	IGSF11	immunoglobulin superfamily, member 11 [Source:HGNC Symbol;Acc:HGNC:16669]	1.63967	0.905123	0.857221	4.40935	9.6014	-1.12268
ENSG00000070061	IKBKAP	inhibitor of kappa light polypeptide gene enhancer in B-cells, kinase complex-associated protein [Source:HGNC Symbol;Acc:HGNC:5959]	1.50461	0.830964	0.856531	26.1084	21.1696	0.302518
ENSG00000120833	SOCS2	suppressor of cytokine signaling 2 [Source:HGNC Symbol;Acc:HGNC:19382]	1.26997	0.701409	0.856469	7.01502	11.5849	-0.723731
ENSG00000011021	CLCN6	chloride channel, voltage-sensitive 6 [Source:HGNC Symbol;Acc:HGNC:2024]	2.0219	1.11671	0.856463	22.2083	35.5941	-0.68054
ENSG00000126603	GLIS2	GLIS family zinc finger 2 [Source:HGNC Symbol;Acc:HGNC:29450]	1.76954	0.977494	0.856216	6.02338	7.23892	-0.265201
ENSG00000186395	KRT10	keratin 10, type I [Source:HGNC Symbol;Acc:HGNC:6413]	1.32921	0.73437	0.85599	11.2352	5.21047	1.10854
ENSG00000188807	TMEM201	transmembrane protein 201 [Source:HGNC Symbol;Acc:HGNC:33719]	1.32	0.729349	0.855857	13.6984	20.5113	-0.582415
ENSG00000204175	GPRIN2	G protein regulated inducer of neurite outgrowth 2 [Source:HGNC Symbol;Acc:HGNC:23730]	0.646168	0.357081	0.85566	10.2284	2.13007	2.26361
ENSG00000114554	PLXNA1	plexin A1 [Source:HGNC Symbol;Acc:HGNC:9099]	1.24352	0.687833	0.854294	38.7688	46.3849	-0.25876
ENSG00000176386	CDC26	cell division cycle 26 [Source:HGNC Symbol;Acc:HGNC:17839]	0.964663	0.533833	0.853635	6.77848	4.46961	0.600814
ENSG00000184863	RBM33	RNA binding motif protein 33 [Source:HGNC Symbol;Acc:HGNC:27223]	1.91007	1.05744	0.853043	11.5753	10.7796	0.102747
ENSG00000162073	PAQR4	progestin and adipoQ receptor family member IV [Source:HGNC Symbol;Acc:HGNC:26386]	1.43149	0.792668	0.852729	13.0077	24.8254	-0.932449
ENSG00000197498	RPF2	ribosome production factor 2 homolog [Source:HGNC Symbol;Acc:HGNC:20870]	1.29985	0.719904	0.852465	4.78513	11.846	-1.30777
ENSG00000154122	ANKH	ANKH inorganic pyrophosphate transport regulator [Source:HGNC Symbol;Acc:HGNC:15492]	1.328	0.735501	0.852451	5.76433	67.1802	-3.54281
ENSG00000106524	ANKMY2	ankyrin repeat and MYND domain containing 2 [Source:HGNC Symbol;Acc:HGNC:25370]	1.12898	0.625451	0.852045	20.5704	23.0259	-0.162689
ENSG00000067064	IDI1	isopentenyl-diphosphate delta isomerase 1 [Source:HGNC Symbol;Acc:HGNC:5387]	3.23935	1.79466	0.85199	59.9058	13.5633	2.14299
ENSG00000141577	CEP131	centrosomal protein 131kDa [Source:HGNC Symbol;Acc:HGNC:29511]	1.19476	0.661921	0.851984	8.35678	12.7025	-0.604095
ENSG00000120784	ZFP30	ZFP30 zinc finger protein [Source:HGNC Symbol;Acc:HGNC:29555]	1.01582	0.56291	0.851663	7.72173	4.99387	0.628766
ENSG00000173744	AGFG1	ArfGAP with FG repeats 1 [Source:HGNC Symbol;Acc:HGNC:5175]	1.51015	0.837041	0.851318	11.2164	22.8714	-1.02793
ENSG00000091651	ORC6	origin recognition complex, subunit 6 [Source:HGNC Symbol;Acc:HGNC:17151]	0.948422	0.525902	0.850735	6.03284	16.4592	-1.44798
ENSG00000100522	GNPNAT1	glucosamine-phosphate N-acetyltransferase 1 [Source:HGNC Symbol;Acc:HGNC:19980]	1.29646	0.718956	0.850603	3.80075	3.14656	0.272508
ENSG00000104313	EYA1	EYA transcriptional coactivator and phosphatase 1 [Source:HGNC Symbol;Acc:HGNC:3519]	2.59117	1.43837	0.849167	2.53134	0.824529	1.61826
ENSG00000031003	FAM13B	family with sequence similarity 13, member B [Source:HGNC Symbol;Acc:HGNC:1335]	1.48494	0.824465	0.84887	30.6903	36.167	-0.236889
ENSG00000143845	ETNK2	ethanolamine kinase 2 [Source:HGNC Symbol;Acc:HGNC:25575]	1.37183	0.762295	0.847685	29.3597	2.11355	3.7961
ENSG00000184232	OAF	out at first homolog [Source:HGNC Symbol;Acc:HGNC:28752]	1.02578	0.570059	0.847541	0.616907	2.6634	-2.11014
ENSG00000173825	TIGD3	tigger transposable element derived 3 [Source:HGNC Symbol;Acc:HGNC:18334]	0.69014	0.383738	0.846767	3.5312	1.89696	0.896466
ENSG00000144369	FAM171B	family with sequence similarity 171, member B [Source:HGNC Symbol;Acc:HGNC:29412]	1.87678	1.04374	0.846493	25.5577	61.5341	-1.26763
ENSG00000230590	FTX	FTX transcript, XIST regulator (non-protein coding) [Source:HGNC Symbol;Acc:HGNC:37190]	1.22071	0.679008	0.846221	1.80946	2.16727	-0.260319
ENSG00000105514	RAB3D	RAB3D, member RAS oncogene family [Source:HGNC Symbol;Acc:HGNC:9779]	1.41042	0.784734	0.845853	3.14412	18.5786	-2.56291
ENSG00000204160	ZDHHC18	zinc finger, DHHC-type containing 18 [Source:HGNC Symbol;Acc:HGNC:20712]	1.69315	0.942081	0.845791	7.72188	8.72066	-0.175486
ENSG00000083097	DOPEY1	dopey family member 1 [Source:HGNC Symbol;Acc:HGNC:21194]	1.11158	0.619112	0.844337	11.0335	6.25226	0.819441
ENSG00000113615	SEC24A	SEC24 family member A [Source:HGNC Symbol;Acc:HGNC:10703]	1.64909	0.918726	0.843966	9.44345	3.88337	1.28201
ENSG00000162728	KCNJ9	potassium channel, inwardly rectifying subfamily J, member 9 [Source:HGNC Symbol;Acc:HGNC:6270]	1.35805	0.75702	0.843137	6.51264	9.09063	-0.481136
ENSG00000147799	ARHGAP39	Rho GTPase activating protein 39 [Source:HGNC Symbol;Acc:HGNC:29351]	1.54843	0.863299	0.842878	13.8129	24.4009	-0.820911
ENSG00000160075	SSU72	SSU72 RNA polymerase II CTD phosphatase homolog (S. cerevisiae) [Source:HGNC Symbol;Acc:HGNC:25016]	1.71036	0.953681	0.842725	28.8561	32.3267	-0.163851
ENSG00000131389	SLC6A6	solute carrier family 6 (neurotransmitter transporter), member 6 [Source:HGNC Symbol;Acc:HGNC:11052]	1.9262	1.07427	0.842396	9.05673	50.5306	-2.4801
ENSG00000228300	C19orf24	chromosome 19 open reading frame 24 [Source:HGNC Symbol;Acc:HGNC:26073]	1.29767	0.723831	0.842204	8.85948	2.97075	1.5764
ENSG00000181222	POLR2A	polymerase (RNA) II (DNA directed) polypeptide A, 220kDa [Source:HGNC Symbol;Acc:HGNC:9187]	1.31196	0.732093	0.841628	36.0594	19.5104	0.886134
ENSG00000188229	TUBB4B	tubulin, beta 4B class IVb [Source:HGNC Symbol;Acc:HGNC:20771]	1.17129	0.653653	0.8415	62.9327	155.188	-1.30214
ENSG00000121741	ZMYM2	zinc finger, MYM-type 2 [Source:HGNC Symbol;Acc:HGNC:12989]	1.32232	0.738293	0.840806	16.3789	18.7294	-0.193462
ENSG00000073150	PANX2	pannexin 2 [Source:HGNC Symbol;Acc:HGNC:8600]	1.92013	1.07214	0.840709	5.94116	29.0879	-2.2916
ENSG00000168081	PNOC	prepronociceptin [Source:HGNC Symbol;Acc:HGNC:9163]	1.91582	1.06984	0.840567	4.99377	11.2665	-1.17384
ENSG00000091844	RGS17	regulator of G-protein signaling 17 [Source:HGNC Symbol;Acc:HGNC:14088]	1.19395	0.666744	0.840544	8.11692	10.648	-0.391579
ENSG00000176946	THAP4	THAP domain containing 4 [Source:HGNC Symbol;Acc:HGNC:23187]	1.3251	0.739991	0.84052	16.5465	2.85427	2.53533
ENSG00000134375	TIMM17A	translocase of inner mitochondrial membrane 17 homolog A (yeast) [Source:HGNC Symbol;Acc:HGNC:17315]	1.25802	0.702647	0.840285	31.7667	7.6907	2.04633
ENSG00000141522	ARHGDIA	Rho GDP dissociation inhibitor (GDI) alpha [Source:HGNC Symbol;Acc:HGNC:678]	1.72443	0.963246	0.840146	72.7752	202.238	-1.47453
ENSG00000100523	DDHD1	DDHD domain containing 1 [Source:HGNC Symbol;Acc:HGNC:19714]	1.48808	0.831371	0.839885	5.05813	8.86485	-0.809492
ENSG00000082213	C5orf22	chromosome 5 open reading frame 22 [Source:HGNC Symbol;Acc:HGNC:25639]	0.826962	0.46203	0.839835	10.986	9.03479	0.282106
ENSG00000174233	ADCY6	adenylate cyclase 6 [Source:HGNC Symbol;Acc:HGNC:237]	1.43547	0.802025	0.8398	15.1227	12.2648	0.302197
ENSG00000138660	AP1AR	adaptor-related protein complex 1 associated regulatory protein [Source:HGNC Symbol;Acc:HGNC:28808]	1.66056	0.927857	0.839697	16.8166	18.7451	-0.156629
ENSG00000154822	PLCL2	phospholipase C-like 2 [Source:HGNC Symbol;Acc:HGNC:9064]	1.45158	0.811331	0.839262	12.5903	16.7989	-0.416055
ENSG00000182512	GLRX5	glutaredoxin 5 [Source:HGNC Symbol;Acc:HGNC:20134]	1.7258	0.96462	0.839229	23.2556	77.9329	-1.74466
ENSG00000117385	P3H1	prolyl 3-hydroxylase 1 [Source:HGNC Symbol;Acc:HGNC:19316]	1.44085	0.805475	0.839007	10.4465	3.89913	1.42179
ENSG00000104833	TUBB4A	tubulin, beta 4A class IVa [Source:HGNC Symbol;Acc:HGNC:20774]	0.795994	0.445106	0.838609	69.7972	210.921	-1.59546
ENSG00000135127	CCDC64	coiled-coil domain containing 64 [Source:HGNC Symbol;Acc:HGNC:28095]	1.75532	0.981625	0.838489	35.2279	26.9146	0.388333
ENSG00000153012	LGI2	leucine-rich repeat LGI family, member 2 [Source:HGNC Symbol;Acc:HGNC:18710]	1.56213	0.873658	0.838375	5.96451	24.6921	-2.04957
ENSG00000204291	COL15A1	collagen, type XV, alpha 1 [Source:HGNC Symbol;Acc:HGNC:2192]	0.518502	0.290024	0.838176	0.886079	3.07372	-1.79448
ENSG00000139289	PHLDA1	pleckstrin homology-like domain, family A, member 1 [Source:HGNC Symbol;Acc:HGNC:8933]	2.24463	1.25612	0.837503	7.72035	8.02824	-0.0564177
ENSG00000174145	NWD2	NACHT and WD repeat domain containing 2 [Source:HGNC Symbol;Acc:HGNC:29229]	0.70429	0.394239	0.837098	1.46266	37.3593	-4.6748
ENSG00000148399	DPH7	diphthamide biosynthesis 7 [Source:HGNC Symbol;Acc:HGNC:25199]	0.852733	0.477501	0.836591	22.5376	8.05264	1.4848
ENSG00000240857	RDH14	retinol dehydrogenase 14 (all-trans/9-cis/11-cis) [Source:HGNC Symbol;Acc:HGNC:19979]	1.05623	0.591635	0.836148	8.49372	14.4889	-0.770476
ENSG00000111364	DDX55	DEAD (Asp-Glu-Ala-Asp) box polypeptide 55 [Source:HGNC Symbol;Acc:HGNC:20085]	0.755798	0.423546	0.835482	12.4501	7.94785	0.647525
ENSG00000205302	SNX2	sorting nexin 2 [Source:HGNC Symbol;Acc:HGNC:11173]	1.22384	0.68585	0.835453	25.3109	29.7537	-0.233314
ENSG00000099821	POLRMT	polymerase (RNA) mitochondrial (DNA directed) [Source:HGNC Symbol;Acc:HGNC:9200]	0.863258	0.483966	0.834885	14.3688	9.04831	0.667224
ENSG00000146282	RARS2	arginyl-tRNA synthetase 2, mitochondrial [Source:HGNC Symbol;Acc:HGNC:21406]	0.913967	0.512788	0.833778	25.8952	11.8255	1.13078
ENSG00000104980	TIMM44	translocase of inner mitochondrial membrane 44 homolog (yeast) [Source:HGNC Symbol;Acc:HGNC:17316]	1.45067	0.81394	0.833728	20.3917	21.255	-0.0598204
ENSG00000175264	CHST1	carbohydrate (keratan sulfate Gal-6) sulfotransferase 1 [Source:HGNC Symbol;Acc:HGNC:1969]	1.16068	0.651276	0.833627	27.1034	42.8657	-0.661353
ENSG00000147852	VLDLR	very low density lipoprotein receptor [Source:HGNC Symbol;Acc:HGNC:12698]	1.36896	0.768518	0.832931	6.01844	20.6718	-1.7802
ENSG00000142611	PRDM16	PR domain containing 16 [Source:HGNC Symbol;Acc:HGNC:14000]	1.16783	0.656118	0.831807	1.28882	1.63299	-0.341462
ENSG00000184949	FAM227A	family with sequence similarity 227, member A [Source:HGNC Symbol;Acc:HGNC:44197]	0.760889	0.427532	0.831654	2.01143	1.69987	0.242793
ENSG00000122882	ECD	ecdysoneless homolog (Drosophila) [Source:HGNC Symbol;Acc:HGNC:17029]	1.40527	0.789821	0.831246	12.6271	10.3555	0.286131
ENSG00000188158	NHS	Nance-Horan syndrome (congenital cataracts and dental anomalies) [Source:HGNC Symbol;Acc:HGNC:7820]	1.23216	0.692549	0.831195	7.27517	1.69279	2.10358
ENSG00000163673	DCLK3	doublecortin-like kinase 3 [Source:HGNC Symbol;Acc:HGNC:19005]	0.721431	0.405562	0.830939	1.04788	8.54342	-3.02734
ENSG00000159147	DONSON	downstream neighbor of SON [Source:HGNC Symbol;Acc:HGNC:2993]	1.42391	0.800574	0.830756	9.22023	8.57801	0.104159
ENSG00000100335	MIEF1	mitochondrial elongation factor 1 [Source:HGNC Symbol;Acc:HGNC:25979]	0.920584	0.517993	0.829618	14.8058	6.4288	1.20354
ENSG00000130340	SNX9	sorting nexin 9 [Source:HGNC Symbol;Acc:HGNC:14973]	1.75741	0.989411	0.828806	7.71001	2.11406	1.86671
ENSG00000088992	TESC	tescalcin [Source:HGNC Symbol;Acc:HGNC:26065]	1.74375	0.981776	0.828727	3.62859	4.65448	-0.359212
ENSG00000175040	CHST2	carbohydrate (N-acetylglucosamine-6-O) sulfotransferase 2 [Source:HGNC Symbol;Acc:HGNC:1970]	1.66691	0.938687	0.828464	11.2001	29.1162	-1.37832
ENSG00000010310	GIPR	gastric inhibitory polypeptide receptor [Source:HGNC Symbol;Acc:HGNC:4271]	1.51532	0.853527	0.828118	0.492728	37.4679	-6.24872
ENSG00000143799	PARP1	poly (ADP-ribose) polymerase 1 [Source:HGNC Symbol;Acc:HGNC:270]	1.13632	0.640228	0.827713	41.2551	27.8911	0.564768
ENSG00000173465	SSSCA1	Sjogren syndrome/scleroderma autoantigen 1 [Source:HGNC Symbol;Acc:HGNC:11328]	1.38396	0.779866	0.827501	14.9838	13.9486	0.103281
ENSG00000090447	TFAP4	transcription factor AP-4 (activating enhancer binding protein 4) [Source:HGNC Symbol;Acc:HGNC:11745]	0.781616	0.440475	0.827401	1.71618	2.03742	-0.24754
ENSG00000138709	LARP1B	La ribonucleoprotein domain family, member 1B [Source:HGNC Symbol;Acc:HGNC:24704]	2.26156	1.27497	0.826854	6.3643	3.42336	0.894589
ENSG00000197296	FITM2	fat storage-inducing transmembrane protein 2 [Source:HGNC Symbol;Acc:HGNC:16135]	1.44094	0.81239	0.826764	6.99965	6.14096	0.188817
ENSG00000142686	C1orf216	chromosome 1 open reading frame 216 [Source:HGNC Symbol;Acc:HGNC:26800]	1.35562	0.764383	0.826587	22.3414	20.6609	0.112816
ENSG00000065833	ME1	malic enzyme 1, NADP(+)-dependent, cytosolic [Source:HGNC Symbol;Acc:HGNC:6983]	2.20066	1.24088	0.826575	6.34113	28.6849	-2.17748
ENSG00000166483	WEE1	WEE1 G2 checkpoint kinase [Source:HGNC Symbol;Acc:HGNC:12761]	1.82883	1.03154	0.826126	3.47281	1.50956	1.20198
ENSG00000150961	SEC24D	SEC24 family member D [Source:HGNC Symbol;Acc:HGNC:10706]	3.01269	1.69938	0.826048	5.50641	8.50172	-0.626642
ENSG00000123689	G0S2	G0/G1 switch 2 [Source:HGNC Symbol;Acc:HGNC:30229]	0.694307	0.39176	0.825604	1.2276	0.878951	0.481986
ENSG00000140943	MBTPS1	membrane-bound transcription factor peptidase, site 1 [Source:HGNC Symbol;Acc:HGNC:15456]	0.895814	0.505465	0.825586	33.6535	18.3164	0.877622
ENSG00000084070	SMAP2	small ArfGAP2 [Source:HGNC Symbol;Acc:HGNC:25082]	1.99682	1.12698	0.825236	40.514	55.7355	-0.460176
ENSG00000092964	DPYSL2	dihydropyrimidinase-like 2 [Source:HGNC Symbol;Acc:HGNC:3014]	0.981288	0.554019	0.824741	168.857	50.4505	1.74286
ENSG00000162623	TYW3	tRNA-yW synthesizing protein 3 homolog (S. cerevisiae) [Source:HGNC Symbol;Acc:HGNC:24757]	0.65398	0.369322	0.824366	3.06809	1.89428	0.695693
ENSG00000214960	ISPD	isoprenoid synthase domain containing [Source:HGNC Symbol;Acc:HGNC:37276]	1.20383	0.680007	0.824006	0.849046	1.60275	-0.916633
ENSG00000160271	RALGDS	ral guanine nucleotide dissociation stimulator [Source:HGNC Symbol;Acc:HGNC:9842]	1.11434	0.629475	0.823974	42.6488	42.3555	0.00995479
ENSG00000100503	NIN	ninein (GSK3B interacting protein) [Source:HGNC Symbol;Acc:HGNC:14906]	1.67136	0.944424	0.823517	7.34418	5.91678	0.31179
ENSG00000131148	EMC8	ER membrane protein complex subunit 8 [Source:HGNC Symbol;Acc:HGNC:7864]	1.55489	0.878739	0.823303	20.4782	13.9816	0.550561
ENSG00000165630	PRPF18	pre-mRNA processing factor 18 [Source:HGNC Symbol;Acc:HGNC:17351]	1.36879	0.773971	0.822548	4.72893	12.2858	-1.3774
ENSG00000182173	TSEN54	TSEN54 tRNA splicing endonuclease subunit [Source:HGNC Symbol;Acc:HGNC:27561]	1.07381	0.607372	0.822085	14.2942	4.5621	1.64766
ENSG00000102753	KPNA3	karyopherin alpha 3 (importin alpha 4) [Source:HGNC Symbol;Acc:HGNC:6396]	1.30984	0.740964	0.821917	25.8085	37.2349	-0.52881
ENSG00000149480	MTA2	metastasis associated 1 family, member 2 [Source:HGNC Symbol;Acc:HGNC:7411]	1.26227	0.714329	0.82136	34.9325	24.5767	0.507278
ENSG00000103257	SLC7A5	solute carrier family 7 (amino acid transporter light chain, L system), member 5 [Source:HGNC Symbol;Acc:HGNC:11063]	3.50766	1.98504	0.821342	23.5188	48.5041	-1.04429
ENSG00000122068	FYTTD1	forty-two-three domain containing 1 [Source:HGNC Symbol;Acc:HGNC:25407]	1.80009	1.01883	0.82115	19.0986	31.1296	-0.704819
ENSG00000087338	GMCL1	germ cell-less, spermatogenesis associated 1 [Source:HGNC Symbol;Acc:HGNC:23843]	1.11193	0.629458	0.820882	5.25072	13.9801	-1.41278
ENSG00000151726	ACSL1	acyl-CoA synthetase long-chain family member 1 [Source:HGNC Symbol;Acc:HGNC:3569]	1.17535	0.665697	0.820152	18.2172	10.8526	0.747265
ENSG00000180008	SOCS4	suppressor of cytokine signaling 4 [Source:HGNC Symbol;Acc:HGNC:19392]	2.45279	1.39075	0.818559	6.2033	2.0076	1.62757
ENSG00000181234	TMEM132C	transmembrane protein 132C [Source:HGNC Symbol;Acc:HGNC:25436]	0.838369	0.475439	0.818326	6.28062	2.55496	1.29761
ENSG00000172766	NAA16	N(alpha)-acetyltransferase 16, NatA auxiliary subunit [Source:HGNC Symbol;Acc:HGNC:26164]	1.34514	0.763068	0.817874	8.14324	1.29411	2.65364
ENSG00000101265	RASSF2	Ras association (RalGDS/AF-6) domain family member 2 [Source:HGNC Symbol;Acc:HGNC:9883]	1.21751	0.690684	0.817832	25.7287	4.23636	2.60248
ENSG00000109534	GAR1	GAR1 homolog, ribonucleoprotein [Source:HGNC Symbol;Acc:HGNC:14264]	1.27456	0.723645	0.816649	10.891	12.3573	-0.182233
ENSG00000162769	FLVCR1	feline leukemia virus subgroup C cellular receptor 1 [Source:HGNC Symbol;Acc:HGNC:24682]	2.56785	1.45808	0.816487	6.8227	5.50778	0.308873
ENSG00000143319	ISG20L2	interferon stimulated exonuclease gene 20kDa-like 2 [Source:HGNC Symbol;Acc:HGNC:25745]	1.85342	1.05244	0.816457	12.0021	6.27238	0.936205
ENSG00000107819	SFXN3	sideroflexin 3 [Source:HGNC Symbol;Acc:HGNC:16087]	1.90466	1.08201	0.815822	25.1281	47.1701	-0.908572
ENSG00000050393	MCUR1	mitochondrial calcium uniporter regulator 1 [Source:HGNC Symbol;Acc:HGNC:21097]	1.44105	0.818883	0.815396	9.07991	2.19424	2.04895
ENSG00000110987	BCL7A	B-cell CLL/lymphoma 7A [Source:HGNC Symbol;Acc:HGNC:1004]	0.849515	0.482857	0.815045	19.656	31.4506	-0.678115
ENSG00000139211	AMIGO2	adhesion molecule with Ig-like domain 2 [Source:HGNC Symbol;Acc:HGNC:24073]	1.06497	0.60536	0.814945	6.3453	3.08091	1.04233
ENSG00000113282	CLINT1	clathrin interactor 1 [Source:HGNC Symbol;Acc:HGNC:23186]	1.26197	0.717427	0.814778	17.1878	8.39104	1.03446
ENSG00000175928	LRRN1	leucine rich repeat neuronal 1 [Source:HGNC Symbol;Acc:HGNC:20980]	1.0529	0.598813	0.814196	39.6821	16.515	1.26471
ENSG00000106546	AHR	aryl hydrocarbon receptor [Source:HGNC Symbol;Acc:HGNC:348]	1.62441	0.92412	0.81376	1.65787	3.59345	-1.11604
ENSG00000066629	EML1	echinoderm microtubule associated protein like 1 [Source:HGNC Symbol;Acc:HGNC:3330]	1.17846	0.670436	0.813735	9.80756	28.5517	-1.54161
ENSG00000099822	HCN2	hyperpolarization activated cyclic nucleotide gated potassium channel 2 [Source:HGNC Symbol;Acc:HGNC:4846]	1.51781	0.863708	0.813372	10.4376	28.6609	-1.4573
ENSG00000185009	AP3M1	adaptor-related protein complex 3, mu 1 subunit [Source:HGNC Symbol;Acc:HGNC:569]	1.20616	0.68647	0.813156	12.6302	8.81643	0.518606
ENSG00000145414	NAF1	nuclear assembly factor 1 ribonucleoprotein [Source:HGNC Symbol;Acc:HGNC:25126]	3.16643	1.80234	0.812985	5.23212	6.47395	-0.30725
ENSG00000175866	BAIAP2	BAI1-associated protein 2 [Source:HGNC Symbol;Acc:HGNC:947]	3.27232	1.86325	0.812495	14.0058	31.3019	-1.16023
ENSG00000172115	CYCS	cytochrome c, somatic [Source:HGNC Symbol;Acc:HGNC:19986]	1.98857	1.1326	0.812091	57.0899	19.992	1.51381
ENSG00000088247	KHSRP	KH-type splicing regulatory protein [Source:HGNC Symbol;Acc:HGNC:6316]	1.48894	0.848568	0.811183	88.7793	23.5322	1.91559
ENSG00000183891	TTC32	tetratricopeptide repeat domain 32 [Source:HGNC Symbol;Acc:HGNC:32954]	0.957927	0.545941	0.811171	16.6872	0.851176	4.29314
ENSG00000103653	CSK	c-src tyrosine kinase [Source:HGNC Symbol;Acc:HGNC:2444]	1.22772	0.699789	0.810991	33.0105	40.9491	-0.310907
ENSG00000166260	COX11	COX11 cytochrome c oxidase copper chaperone [Source:HGNC Symbol;Acc:HGNC:2261]	1.04262	0.594402	0.810707	13.8895	9.33971	0.572542
ENSG00000103326	CAPN15	calpain 15 [Source:HGNC Symbol;Acc:HGNC:11182]	1.27942	0.729815	0.809885	8.03602	9.20622	-0.196129
ENSG00000180694	TMEM64	transmembrane protein 64 [Source:HGNC Symbol;Acc:HGNC:25441]	1.67438	0.955428	0.809408	3.99939	7.92002	-0.985724
ENSG00000204120	GIGYF2	GRB10 interacting GYF protein 2 [Source:HGNC Symbol;Acc:HGNC:11960]	0.673221	0.384644	0.807557	15.9723	17.3255	-0.117326
ENSG00000177666	PNPLA2	patatin-like phospholipase domain containing 2 [Source:HGNC Symbol;Acc:HGNC:30802]	1.40701	0.803953	0.807446	15.8359	5.24602	1.59391
ENSG00000177189	RPS6KA3	ribosomal protein S6 kinase, 90kDa, polypeptide 3 [Source:HGNC Symbol;Acc:HGNC:10432]	1.99278	1.1391	0.80689	6.9204	12.0584	-0.801105
ENSG00000175581	MRPL48	mitochondrial ribosomal protein L48 [Source:HGNC Symbol;Acc:HGNC:16653]	1.66529	0.951933	0.806841	9.19384	5.26249	0.804922
ENSG00000108588	CCDC47	coiled-coil domain containing 47 [Source:HGNC Symbol;Acc:HGNC:24856]	1.71662	0.981331	0.806756	20.9494	20.949	2.18582e-05
ENSG00000138413	IDH1	isocitrate dehydrogenase 1 (NADP+), soluble [Source:HGNC Symbol;Acc:HGNC:5382]	1.5229	0.87101	0.806062	68.2414	142.471	-1.06195
ENSG00000126062	TMEM115	transmembrane protein 115 [Source:HGNC Symbol;Acc:HGNC:30055]	1.13011	0.646478	0.805795	21.5467	16.0405	0.425752
ENSG00000170903	MSANTD4	Myb/SANT-like DNA-binding domain containing 4 with coiled-coils [Source:HGNC Symbol;Acc:HGNC:29383]	0.991818	0.567367	0.805793	20.0776	20.4556	-0.0269093
ENSG00000163053	SLC16A14	solute carrier family 16, member 14 [Source:HGNC Symbol;Acc:HGNC:26417]	0.835346	0.477954	0.805502	14.3196	4.26388	1.74776
ENSG00000179152	TCAIM	T cell activation inhibitor, mitochondrial [Source:HGNC Symbol;Acc:HGNC:25241]	0.769925	0.440597	0.80526	8.98814	3.36253	1.41848
ENSG00000071246	VASH1	vasohibin 1 [Source:HGNC Symbol;Acc:HGNC:19964]	1.05547	0.604063	0.805114	17.5357	32.9481	-0.909897
ENSG00000138166	DUSP5	dual specificity phosphatase 5 [Source:HGNC Symbol;Acc:HGNC:3071]	13.8318	7.91646	0.805057	2.99737	1.87924	0.673547
ENSG00000104756	KCTD9	potassium channel tetramerization domain containing 9 [Source:HGNC Symbol;Acc:HGNC:22401]	2.1006	1.20234	0.80496	2.84899	1.57362	0.856367
ENSG00000082458	DLG3	discs, large homolog 3 (Drosophila) [Source:HGNC Symbol;Acc:HGNC:2902]	1.10292	0.63141	0.804677	15.7175	41.485	-1.40022
ENSG00000135318	NT5E	5'-nucleotidase, ecto (CD73) [Source:HGNC Symbol;Acc:HGNC:8021]	1.66289	0.952229	0.804316	1.81764	0.673642	1.43202
ENSG00000137968	SLC44A5	solute carrier family 44, member 5 [Source:HGNC Symbol;Acc:HGNC:28524]	1.00687	0.576616	0.804191	11.1962	3.96097	1.49909
ENSG00000108829	LRRC59	leucine rich repeat containing 59 [Source:HGNC Symbol;Acc:HGNC:28817]	1.78188	1.02125	0.803058	27.7852	53.2314	-0.937962
ENSG00000103365	GGA2	golgi-associated, gamma adaptin ear containing, ARF binding protein 2 [Source:HGNC Symbol;Acc:HGNC:16064]	1.64247	0.942235	0.801713	9.20894	12.5698	-0.448849
ENSG00000184900	SUMO3	small ubiquitin-like modifier 3 [Source:HGNC Symbol;Acc:HGNC:11124]	1.36129	0.781131	0.801338	65.8927	42.5789	0.629979
ENSG00000047662	FAM184B	family with sequence similarity 184, member B [Source:HGNC Symbol;Acc:HGNC:29235]	0.727458	0.417631	0.800635	1.30054	4.59703	-1.82159
ENSG00000158545	ZC3H18	zinc finger CCCH-type containing 18 [Source:HGNC Symbol;Acc:HGNC:25091]	1.33856	0.768628	0.800324	13.8356	10.418	0.409306
ENSG00000168917	SLC35G2	solute carrier family 35, member G2 [Source:HGNC Symbol;Acc:HGNC:28480]	1.56916	0.901178	0.800109	7.13893	3.49108	1.03203
ENSG00000112149	CD83	CD83 molecule [Source:HGNC Symbol;Acc:HGNC:1703]	1.52935	0.878336	0.800072	6.53266	1.85207	1.81853
ENSG00000172954	LCLAT1	lysocardiolipin acyltransferase 1 [Source:HGNC Symbol;Acc:HGNC:26756]	1.31005	0.753165	0.79858	3.51321	11.9603	-1.76739
ENSG00000112182	BACH2	BTB and CNC homology 1, basic leucine zipper transcription factor 2 [Source:HGNC Symbol;Acc:HGNC:14078]	3.5292	2.02941	0.798278	8.52755	5.97993	0.512002
ENSG00000166484	MAPK7	mitogen-activated protein kinase 7 [Source:HGNC Symbol;Acc:HGNC:6880]	0.88647	0.509766	0.798236	10.5452	21.3602	-1.01834
ENSG00000105516	DBP	D site of albumin promoter (albumin D-box) binding protein [Source:HGNC Symbol;Acc:HGNC:2697]	0.967478	0.556362	0.798204	1.7391	4.75831	-1.45211
ENSG00000025800	KPNA6	karyopherin alpha 6 (importin alpha 7) [Source:HGNC Symbol;Acc:HGNC:6399]	1.362	0.783307	0.798075	11.5568	20.8156	-0.848919
ENSG00000117616	RSRP1	arginine/serine-rich protein 1 [Source:HGNC Symbol;Acc:HGNC:25234]	1.70378	0.979894	0.798045	19.7224	105.341	-2.41716
ENSG00000124380	SNRNP27	small nuclear ribonucleoprotein 27kDa (U4/U6.U5) [Source:HGNC Symbol;Acc:HGNC:30240]	1.56486	0.90004	0.797971	20.1462	23.198	-0.203498
ENSG00000148248	SURF4	surfeit 4 [Source:HGNC Symbol;Acc:HGNC:11476]	1.70586	0.981139	0.797969	35.4553	32.4476	0.127889
ENSG00000127125	PPCS	phosphopantothenoylcysteine synthetase [Source:HGNC Symbol;Acc:HGNC:25686]	0.669437	0.385116	0.797656	20.2344	3.14154	2.68727
ENSG00000163811	WDR43	WD repeat domain 43 [Source:HGNC Symbol;Acc:HGNC:28945]	1.34525	0.77438	0.796756	9.56304	9.92334	-0.053357
ENSG00000132906	CASP9	caspase 9, apoptosis-related cysteine peptidase [Source:HGNC Symbol;Acc:HGNC:1511]	1.15682	0.665926	0.796728	3.85376	8.2807	-1.10349
ENSG00000196924	FLNA	filamin A, alpha [Source:HGNC Symbol;Acc:HGNC:3754]	1.54816	0.891715	0.795903	37.7854	59.539	-0.656005
ENSG00000140320	BAHD1	bromo adjacent homology domain containing 1 [Source:HGNC Symbol;Acc:HGNC:29153]	2.31666	1.33486	0.795361	11.9339	14.4025	-0.271261
ENSG00000109118	PHF12	PHD finger protein 12 [Source:HGNC Symbol;Acc:HGNC:20816]	1.15308	0.664442	0.795274	12.2341	13.9349	-0.187799
ENSG00000147676	MAL2	mal, T-cell differentiation protein 2 (gene/pseudogene) [Source:HGNC Symbol;Acc:HGNC:13634]	1.25143	0.721347	0.794809	11.8826	25.3833	-1.09503
ENSG00000174227	PIGG	phosphatidylinositol glycan anchor biosynthesis, class G [Source:HGNC Symbol;Acc:HGNC:25985]	0.961818	0.554769	0.793878	16.323	3.04689	2.4215
ENSG00000106105	GARS	glycyl-tRNA synthetase [Source:HGNC Symbol;Acc:HGNC:4162]	2.01541	1.16262	0.793689	58.6672	87.6861	-0.579793
ENSG00000116191	RALGPS2	Ral GEF with PH domain and SH3 binding motif 2 [Source:HGNC Symbol;Acc:HGNC:30279]	1.3884	0.80105	0.793458	8.9794	12.7263	-0.503124
ENSG00000136816	TOR1B	torsin family 1, member B (torsin B) [Source:HGNC Symbol;Acc:HGNC:11995]	1.37122	0.791232	0.79329	12.7207	7.93674	0.680559
ENSG00000134070	IRAK2	interleukin-1 receptor-associated kinase 2 [Source:HGNC Symbol;Acc:HGNC:6113]	1.07858	0.622647	0.792643	0.879168	1.04665	-0.25157
ENSG00000145390	USP53	ubiquitin specific peptidase 53 [Source:HGNC Symbol;Acc:HGNC:29255]	2.08397	1.20312	0.79256	1.7627	2.66719	-0.597534
ENSG00000090020	SLC9A1	solute carrier family 9, subfamily A (NHE1, cation proton antiporter 1), member 1 [Source:HGNC Symbol;Acc:HGNC:11071]	1.17245	0.677055	0.792185	7.0256	9.48053	-0.432346
ENSG00000197479	PCDHB11	protocadherin beta 11 [Source:HGNC Symbol;Acc:HGNC:8682]	1.37163	0.792135	0.792074	0.518943	3.06878	-2.56402
ENSG00000198742	SMURF1	SMAD specific E3 ubiquitin protein ligase 1 [Source:HGNC Symbol;Acc:HGNC:16807]	1.61327	0.93173	0.792008	12.595	17.1594	-0.446154
ENSG00000171823	FBXL14	F-box and leucine-rich repeat protein 14 [Source:HGNC Symbol;Acc:HGNC:28624]	1.17366	0.677983	0.791699	11.1473	8.96464	0.31438
ENSG00000112031	MTRF1L	mitochondrial translational release factor 1-like [Source:HGNC Symbol;Acc:HGNC:21051]	1.47438	0.851838	0.791454	4.91521	2.33441	1.0742
ENSG00000167397	VKORC1	vitamin K epoxide reductase complex, subunit 1 [Source:HGNC Symbol;Acc:HGNC:23663]	1.77607	1.0263	0.791233	9.69565	8.00128	0.277108
ENSG00000188385	JAKMIP3	Janus kinase and microtubule interacting protein 3 [Source:HGNC Symbol;Acc:HGNC:23523]	0.912342	0.527299	0.790953	4.32025	10.1953	-1.23872
ENSG00000107949	BCCIP	BRCA2 and CDKN1A interacting protein [Source:HGNC Symbol;Acc:HGNC:978]	1.35277	0.782152	0.790394	19.6377	22.8589	-0.219129
ENSG00000185262	UBALD2	UBA-like domain containing 2 [Source:HGNC Symbol;Acc:HGNC:28438]	1.83859	1.06379	0.789389	15.8387	10.6696	0.569949
ENSG00000138311	ZNF365	zinc finger protein 365 [Source:HGNC Symbol;Acc:HGNC:18194]	1.09166	0.631736	0.789125	3.20356	17.4998	-2.44959
ENSG00000006831	ADIPOR2	adiponectin receptor 2 [Source:HGNC Symbol;Acc:HGNC:24041]	2.61029	1.51062	0.789072	18.7768	22.0522	-0.231974
ENSG00000155363	MOV10	Mov10 RISC complex RNA helicase [Source:HGNC Symbol;Acc:HGNC:7200]	0.731228	0.423183	0.789041	3.42153	2.10758	0.699053
ENSG00000107295	SH3GL2	SH3-domain GRB2-like 2 [Source:HGNC Symbol;Acc:HGNC:10831]	1.64904	0.954826	0.788315	30.4098	63.0301	-1.0515
ENSG00000272674	PCDHB16	protocadherin beta 16 [Source:HGNC Symbol;Acc:HGNC:14546]	1.50268	0.870142	0.78822	2.70478	4.20338	-0.636041
ENSG00000101445	PPP1R16B	protein phosphatase 1, regulatory subunit 16B [Source:HGNC Symbol;Acc:HGNC:15850]	1.70153	0.98535	0.788124	4.39429	11.306	-1.36339
ENSG00000123908	AGO2	argonaute RISC catalytic component 2 [Source:HGNC Symbol;Acc:HGNC:3263]	2.21764	1.28449	0.787836	4.64351	11.7305	-1.33698
ENSG00000104722	NEFM	neurofilament, medium polypeptide [Source:HGNC Symbol;Acc:HGNC:7734]	2.69354	1.56026	0.78772	33.5955	26.5245	0.340942
ENSG00000198909	MAP3K3	mitogen-activated protein kinase kinase kinase 3 [Source:HGNC Symbol;Acc:HGNC:6855]	2.08331	1.20732	0.787073	5.47178	4.76658	0.199055
ENSG00000247077	PGAM5	phosphoglycerate mutase family member 5 [Source:HGNC Symbol;Acc:HGNC:28763]	1.29422	0.750209	0.786719	13.2855	17.5338	-0.400285
ENSG00000100697	DICER1	dicer 1, ribonuclease type III [Source:HGNC Symbol;Acc:HGNC:17098]	1.07102	0.620979	0.786367	16.8997	8.62121	0.971036
ENSG00000103044	HAS3	hyaluronan synthase 3 [Source:HGNC Symbol;Acc:HGNC:4820]	0.751292	0.435637	0.786246	4.01193	4.47868	-0.158776
ENSG00000196715	VKORC1L1	vitamin K epoxide reductase complex, subunit 1-like 1 [Source:HGNC Symbol;Acc:HGNC:21492]	1.29376	0.750353	0.785925	16.3137	22.0014	-0.431517
ENSG00000103111	MON1B	MON1 secretory trafficking family member B [Source:HGNC Symbol;Acc:HGNC:25020]	0.865096	0.501839	0.785637	10.6769	7.4654	0.516206
ENSG00000111880	RNGTT	RNA guanylyltransferase and 5'-phosphatase [Source:HGNC Symbol;Acc:HGNC:10073]	0.99212	0.576088	0.784225	10.4051	7.42086	0.487633
ENSG00000198841	KTI12	KTI12 chromatin associated homolog [Source:HGNC Symbol;Acc:HGNC:25160]	1.07048	0.62172	0.783916	4.90084	4.21395	0.217853
ENSG00000117222	RBBP5	retinoblastoma binding protein 5 [Source:HGNC Symbol;Acc:HGNC:9888]	1.10798	0.643905	0.783017	5.90864	10.0339	-0.763991
ENSG00000010072	SPRTN	SprT-like N-terminal domain [Source:HGNC Symbol;Acc:HGNC:25356]	1.3055	0.758786	0.782832	3.39164	6.89902	-1.02441
ENSG00000166166	TRMT61A	tRNA methyltransferase 61A [Source:HGNC Symbol;Acc:HGNC:23790]	1.06758	0.620594	0.782628	6.29711	9.22439	-0.550764
ENSG00000007376	RPUSD1	RNA pseudouridylate synthase domain containing 1 [Source:HGNC Symbol;Acc:HGNC:14173]	1.01281	0.588811	0.782488	13.9336	15.812	-0.18245
ENSG00000180773	SLC36A4	solute carrier family 36 (proton/amino acid symporter), member 4 [Source:HGNC Symbol;Acc:HGNC:19660]	1.50594	0.875506	0.782472	9.23133	17.0687	-0.886741
ENSG00000123416	TUBA1B	tubulin, alpha 1b [Source:HGNC Symbol;Acc:HGNC:18809]	1.03079	0.599316	0.782363	66.7358	128.863	-0.949304
ENSG00000146576	C7orf26	chromosome 7 open reading frame 26 [Source:HGNC Symbol;Acc:HGNC:21702]	1.25662	0.730732	0.782134	23.0604	5.15097	2.1625
ENSG00000108819	PPP1R9B	protein phosphatase 1, regulatory subunit 9B [Source:HGNC Symbol;Acc:HGNC:9298]	1.63819	0.952711	0.781995	47.2833	102.521	-1.11651
ENSG00000071575	TRIB2	tribbles pseudokinase 2 [Source:HGNC Symbol;Acc:HGNC:30809]	1.48054	0.861128	0.781827	106.009	24.8451	2.09315
ENSG00000147364	FBXO25	F-box protein 25 [Source:HGNC Symbol;Acc:HGNC:13596]	1.09466	0.636867	0.781425	6.44412	44.277	-2.7805
ENSG00000168389	MFSD2A	major facilitator superfamily domain containing 2A [Source:HGNC Symbol;Acc:HGNC:25897]	2.01955	1.17506	0.781295	8.19611	3.43192	1.25592
ENSG00000247315	ZCCHC3	zinc finger, CCHC domain containing 3 [Source:HGNC Symbol;Acc:HGNC:16230]	1.01539	0.590847	0.781173	15.6621	4.18414	1.90428
ENSG00000140859	KIFC3	kinesin family member C3 [Source:HGNC Symbol;Acc:HGNC:6326]	1.52742	0.889229	0.780466	21.4249	23.2254	-0.11641
ENSG00000141338	ABCA8	ATP-binding cassette, sub-family A (ABC1), member 8 [Source:HGNC Symbol;Acc:HGNC:38]	1.91293	1.11375	0.780359	2.1523	1.22505	0.813042
ENSG00000167566	NCKAP5L	NCK-associated protein 5-like [Source:HGNC Symbol;Acc:HGNC:29321]	1.33008	0.774495	0.780189	17.5923	8.87355	0.987363
ENSG00000198492	YTHDF2	YTH N(6)-methyladenosine RNA binding protein 2 [Source:HGNC Symbol;Acc:HGNC:31675]	1.19678	0.696958	0.78002	33.3034	13.0432	1.35237
ENSG00000112062	MAPK14	mitogen-activated protein kinase 14 [Source:HGNC Symbol;Acc:HGNC:6876]	1.30007	0.757173	0.779892	11.3682	16.381	-0.527016
ENSG00000151014	NOCT	nocturnin [Source:HGNC Symbol;Acc:HGNC:14254]	2.35097	1.3695	0.779607	4.79763	6.87803	-0.519674
ENSG00000125107	CNOT1	CCR4-NOT transcription complex, subunit 1 [Source:HGNC Symbol;Acc:HGNC:7877]	1.54284	0.898994	0.779209	17.9953	17.2467	0.0612939
ENSG00000214595	EML6	echinoderm microtubule associated protein like 6 [Source:HGNC Symbol;Acc:HGNC:35412]	1.54157	0.898497	0.778818	2.47643	4.02074	-0.6992
ENSG00000031823	RANBP3	RAN binding protein 3 [Source:HGNC Symbol;Acc:HGNC:9850]	1.22895	0.716426	0.778539	29.188	44.3903	-0.604872
ENSG00000176597	B3GNT5	UDP-GlcNAc:betaGal beta-1,3-N-acetylglucosaminyltransferase 5 [Source:HGNC Symbol;Acc:HGNC:15684]	1.39765	0.815148	0.777866	5.49765	2.47615	1.15071
ENSG00000133789	SWAP70	SWAP switching B-cell complex 70kDa subunit [Source:HGNC Symbol;Acc:HGNC:17070]	1.79111	1.04475	0.777701	2.40064	3.33507	-0.474301
ENSG00000242259	C22orf39	chromosome 22 open reading frame 39 [Source:HGNC Symbol;Acc:HGNC:27012]	1.25339	0.731327	0.777251	14.0097	8.81162	0.668943
ENSG00000161547	SRSF2	serine/arginine-rich splicing factor 2 [Source:HGNC Symbol;Acc:HGNC:10783]	1.60823	0.938448	0.777128	43.7438	83.7831	-0.937579
ENSG00000101654	RNMT	RNA (guanine-7-) methyltransferase [Source:HGNC Symbol;Acc:HGNC:10075]	1.27191	0.742195	0.777127	22.0404	17.0327	0.37184
ENSG00000163788	SNRK	SNF related kinase [Source:HGNC Symbol;Acc:HGNC:30598]	1.25987	0.735302	0.776867	12.9254	20.2258	-0.645986
ENSG00000117477	CCDC181	coiled-coil domain containing 181 [Source:HGNC Symbol;Acc:HGNC:28051]	1.53177	0.894226	0.776488	7.04041	7.19013	-0.0303589
ENSG00000143669	LYST	lysosomal trafficking regulator [Source:HGNC Symbol;Acc:HGNC:1968]	1.42324	0.831308	0.775727	4.74256	2.38057	0.99436
ENSG00000116337	AMPD2	adenosine monophosphate deaminase 2 [Source:HGNC Symbol;Acc:HGNC:469]	1.48237	0.865896	0.775642	25.8181	20.4202	0.338389
ENSG00000156374	PCGF6	polycomb group ring finger 6 [Source:HGNC Symbol;Acc:HGNC:21156]	1.14723	0.670289	0.775294	4.01945	8.56088	-1.09076
ENSG00000173418	NAA20	N(alpha)-acetyltransferase 20, NatB catalytic subunit [Source:HGNC Symbol;Acc:HGNC:15908]	1.21105	0.707651	0.775144	21.9382	19.625	0.160751
ENSG00000177614	PGBD5	piggyBac transposable element derived 5 [Source:HGNC Symbol;Acc:HGNC:19405]	1.25461	0.733178	0.775001	5.61382	28.7713	-2.35757
ENSG00000135338	LCA5	Leber congenital amaurosis 5 [Source:HGNC Symbol;Acc:HGNC:31923]	1.42597	0.833345	0.774958	3.24586	4.50777	-0.473813
ENSG00000141127	PRPSAP2	phosphoribosyl pyrophosphate synthetase-associated protein 2 [Source:HGNC Symbol;Acc:HGNC:9467]	0.836991	0.489163	0.774896	41.4694	16.9591	1.28999
ENSG00000215114	UBXN2B	UBX domain protein 2B [Source:HGNC Symbol;Acc:HGNC:27035]	1.30271	0.761454	0.77469	27.3217	9.74995	1.48658
ENSG00000096063	SRPK1	SRSF protein kinase 1 [Source:HGNC Symbol;Acc:HGNC:11305]	1.24071	0.725229	0.774663	15.0658	18.8224	-0.321176
ENSG00000159082	SYNJ1	synaptojanin 1 [Source:HGNC Symbol;Acc:HGNC:11503]	1.65917	0.969951	0.774475	13.8697	38.0121	-1.45452
ENSG00000196526	AFAP1	actin filament associated protein 1 [Source:HGNC Symbol;Acc:HGNC:24017]	1.20974	0.707215	0.774473	21.1331	18.2519	0.211452
ENSG00000125347	IRF1	interferon regulatory factor 1 [Source:HGNC Symbol;Acc:HGNC:6116]	2.13424	1.24792	0.774197	0.401693	1.36573	-1.76551
ENSG00000078804	TP53INP2	tumor protein p53 inducible nuclear protein 2 [Source:HGNC Symbol;Acc:HGNC:16104]	1.95424	1.14292	0.773889	30.4653	71.7089	-1.23498
ENSG00000138593	SECISBP2L	SECIS binding protein 2-like [Source:HGNC Symbol;Acc:HGNC:28997]	1.16805	0.683357	0.773388	20.6615	16.9343	0.286994
ENSG00000151208	DLG5	discs, large homolog 5 (Drosophila) [Source:HGNC Symbol;Acc:HGNC:2904]	1.27656	0.747158	0.772777	23.7977	13.772	0.789089
ENSG00000163818	LZTFL1	leucine zipper transcription factor-like 1 [Source:HGNC Symbol;Acc:HGNC:6741]	1.27871	0.749014	0.771627	7.53401	6.10694	0.302968
ENSG00000175455	CCDC14	coiled-coil domain containing 14 [Source:HGNC Symbol;Acc:HGNC:25766]	0.804387	0.471278	0.771311	11.1892	0.759931	3.8801
ENSG00000071564	TCF3	transcription factor 3 [Source:HGNC Symbol;Acc:HGNC:11633]	1.64702	0.96511	0.771091	22.1221	15.1089	0.550095
ENSG00000129925	TMEM8A	transmembrane protein 8A [Source:HGNC Symbol;Acc:HGNC:17205]	1.40739	0.824843	0.770832	12.2601	2.59446	2.24047
ENSG00000143621	ILF2	interleukin enhancer binding factor 2 [Source:HGNC Symbol;Acc:HGNC:6037]	1.31325	0.770105	0.770017	107.386	29.8136	1.84877
ENSG00000167657	DAPK3	death-associated protein kinase 3 [Source:HGNC Symbol;Acc:HGNC:2676]	1.66904	0.978765	0.769981	30.5741	20.099	0.605187
ENSG00000168936	TMEM129	transmembrane protein 129, E3 ubiquitin protein ligase [Source:HGNC Symbol;Acc:HGNC:25137]	0.796034	0.466818	0.76997	21.1218	7.95878	1.40812
ENSG00000159409	CELF3	CUGBP, Elav-like family member 3 [Source:HGNC Symbol;Acc:HGNC:11967]	1.4578	0.855074	0.769672	124.024	104.494	0.24719
ENSG00000130699	TAF4	TAF4 RNA polymerase II, TATA box binding protein (TBP)-associated factor, 135kDa [Source:HGNC Symbol;Acc:HGNC:11537]	1.26401	0.741596	0.769297	9.30835	6.79024	0.455062
ENSG00000160446	ZDHHC12	zinc finger, DHHC-type containing 12 [Source:HGNC Symbol;Acc:HGNC:19159]	0.940146	0.551623	0.769201	1.09942	6.03547	-2.45672
ENSG00000165732	DDX21	DEAD (Asp-Glu-Ala-Asp) box helicase 21 [Source:HGNC Symbol;Acc:HGNC:2744]	1.48689	0.873003	0.76824	14.7677	11.8817	0.313704
ENSG00000121879	PIK3CA	phosphatidylinositol-4,5-bisphosphate 3-kinase, catalytic subunit alpha [Source:HGNC Symbol;Acc:HGNC:8975]	1.77175	1.04042	0.768016	6.05822	8.57288	-0.500884
ENSG00000104687	GSR	glutathione reductase [Source:HGNC Symbol;Acc:HGNC:4623]	1.3018	0.764472	0.767974	13.8289	12.6783	0.125326
ENSG00000109917	ZPR1	ZPR1 zinc finger [Source:HGNC Symbol;Acc:HGNC:13051]	1.37433	0.807075	0.767953	6.81149	14.3603	-1.07604
ENSG00000029363	BCLAF1	BCL2-associated transcription factor 1 [Source:HGNC Symbol;Acc:HGNC:16863]	1.14591	0.673218	0.767351	33.7537	28.9267	0.222643
ENSG00000165392	WRN	Werner syndrome, RecQ helicase-like [Source:HGNC Symbol;Acc:HGNC:12791]	0.997173	0.585872	0.767259	3.10716	1.75538	0.823812
ENSG00000118263	KLF7	Kruppel-like factor 7 (ubiquitous) [Source:HGNC Symbol;Acc:HGNC:6350]	1.13216	0.665221	0.767175	16.3506	16.2531	0.00862311
ENSG00000139645	ANKRD52	ankyrin repeat domain 52 [Source:HGNC Symbol;Acc:HGNC:26614]	1.49944	0.881135	0.766993	15.7992	27.3465	-0.79151
ENSG00000136758	YME1L1	YME1-like 1 ATPase [Source:HGNC Symbol;Acc:HGNC:12843]	1.46484	0.861395	0.765997	35.463	21.7808	0.703257
ENSG00000185033	SEMA4B	sema domain, immunoglobulin domain (Ig), transmembrane domain (TM) and short cytoplasmic domain, (semaphorin) 4B [Source:HGNC Symbol;Acc:HGNC:10730]	0.878814	0.516877	0.765737	14.8475	6.53225	1.18457
ENSG00000100811	YY1	YY1 transcription factor [Source:HGNC Symbol;Acc:HGNC:12856]	2.51791	1.48102	0.765629	19.7487	26.9957	-0.450974
ENSG00000158710	TAGLN2	transgelin 2 [Source:HGNC Symbol;Acc:HGNC:11554]	2.13866	1.25833	0.765201	37.8685	9.17213	2.04567
ENSG00000020577	SAMD4A	sterile alpha motif domain containing 4A [Source:HGNC Symbol;Acc:HGNC:23023]	2.92287	1.71987	0.765082	4.06993	4.32236	-0.0868158
ENSG00000080371	RAB21	RAB21, member RAS oncogene family [Source:HGNC Symbol;Acc:HGNC:18263]	1.745	1.02713	0.7646	5.11843	30.7449	-2.58657
ENSG00000166900	STX3	syntaxin 3 [Source:HGNC Symbol;Acc:HGNC:11438]	1.54022	0.906987	0.763987	6.59099	6.58772	0.000716028
ENSG00000006432	MAP3K9	mitogen-activated protein kinase kinase kinase 9 [Source:HGNC Symbol;Acc:HGNC:6861]	1.757	1.03484	0.7637	10.087	16.8808	-0.742892
ENSG00000033030	ZCCHC8	zinc finger, CCHC domain containing 8 [Source:HGNC Symbol;Acc:HGNC:25265]	1.14619	0.675146	0.763575	5.93251	8.25239	-0.476169
ENSG00000163288	GABRB1	gamma-aminobutyric acid (GABA) A receptor, beta 1 [Source:HGNC Symbol;Acc:HGNC:4081]	1.42571	0.840258	0.762779	2.4519	7.92439	-1.6924
ENSG00000138495	COX17	COX17 cytochrome c oxidase copper chaperone [Source:HGNC Symbol;Acc:HGNC:2264]	1.10467	0.651136	0.762582	23.3306	1.28489	4.18251
ENSG00000175352	NRIP3	nuclear receptor interacting protein 3 [Source:HGNC Symbol;Acc:HGNC:1167]	2.3408	1.37996	0.762372	6.48989	29.1827	-2.16885
ENSG00000127124	HIVEP3	human immunodeficiency virus type I enhancer binding protein 3 [Source:HGNC Symbol;Acc:HGNC:13561]	1.61885	0.954881	0.761573	2.31993	8.95126	-1.94801
ENSG00000167981	ZNF597	zinc finger protein 597 [Source:HGNC Symbol;Acc:HGNC:26573]	1.23406	0.727971	0.761465	1.59515	4.36381	-1.4519
ENSG00000021762	OSBPL5	oxysterol binding protein-like 5 [Source:HGNC Symbol;Acc:HGNC:16392]	1.08062	0.637543	0.761259	18.2125	13.6681	0.414113
ENSG00000162873	KLHDC8A	kelch domain containing 8A [Source:HGNC Symbol;Acc:HGNC:25573]	1.48655	0.877211	0.760976	29.3504	5.12638	2.51737
ENSG00000169410	PTPN9	protein tyrosine phosphatase, non-receptor type 9 [Source:HGNC Symbol;Acc:HGNC:9661]	1.08858	0.642546	0.76057	9.88957	17.3611	-0.81188
ENSG00000144021	CIAO1	cytosolic iron-sulfur assembly component 1 [Source:HGNC Symbol;Acc:HGNC:14280]	0.962345	0.568119	0.76036	33.8594	14.2717	1.2464
ENSG00000156026	MCU	mitochondrial calcium uniporter [Source:HGNC Symbol;Acc:HGNC:23526]	1.18689	0.700852	0.76	8.55325	22.1174	-1.37064
ENSG00000242802	AP5Z1	adaptor-related protein complex 5, zeta 1 subunit [Source:HGNC Symbol;Acc:HGNC:22197]	1.0106	0.596785	0.759928	9.03371	4.52714	0.996718
ENSG00000131669	NINJ1	ninjurin 1 [Source:HGNC Symbol;Acc:HGNC:7824]	1.36281	0.805165	0.759231	6.99513	10.498	-0.585696
ENSG00000198954	KIF1BP	KIF1 binding protein [Source:HGNC Symbol;Acc:HGNC:23419]	1.45829	0.861644	0.759109	25.024	43.4615	-0.796425
ENSG00000166477	LEO1	LEO1 homolog, Paf1/RNA polymerase II complex component [Source:HGNC Symbol;Acc:HGNC:30401]	1.37194	0.810709	0.758956	15.9587	21.0697	-0.400822
ENSG00000143195	ILDR2	immunoglobulin-like domain containing receptor 2 [Source:HGNC Symbol;Acc:HGNC:18131]	1.52246	0.899768	0.758774	7.10395	14.5034	-1.0297
ENSG00000225697	SLC26A6	solute carrier family 26 (anion exchanger), member 6 [Source:HGNC Symbol;Acc:HGNC:14472]	1.28769	0.761157	0.758521	2.92884	4.30021	-0.554076
ENSG00000123268	ATF1	activating transcription factor 1 [Source:HGNC Symbol;Acc:HGNC:783]	1.64097	0.97009	0.758357	4.92448	3.46202	0.508359
ENSG00000134323	MYCN	v-myc avian myelocytomatosis viral oncogene neuroblastoma derived homolog [Source:HGNC Symbol;Acc:HGNC:7559]	0.756289	0.447269	0.757795	10.2352	24.3638	-1.2512
ENSG00000186130	ZBTB6	zinc finger and BTB domain containing 6 [Source:HGNC Symbol;Acc:HGNC:16764]	0.529977	0.313462	0.757639	10.0874	6.24376	0.692065
ENSG00000099385	BCL7C	B-cell CLL/lymphoma 7C [Source:HGNC Symbol;Acc:HGNC:1006]	1.3272	0.785107	0.757429	16.3878	12.6629	0.372013
ENSG00000167971	CASKIN1	CASK interacting protein 1 [Source:HGNC Symbol;Acc:HGNC:20879]	1.49058	0.882103	0.756855	24.8985	37.6703	-0.597372
ENSG00000146476	ARMT1	acidic residue methyltransferase 1 [Source:HGNC Symbol;Acc:HGNC:17872]	0.947755	0.560899	0.756772	7.58227	1.78723	2.0849
ENSG00000162923	WDR26	WD repeat domain 26 [Source:HGNC Symbol;Acc:HGNC:21208]	2.06581	1.22263	0.756719	19.3389	29.2269	-0.595791
ENSG00000162614	NEXN	nexilin (F actin binding protein) [Source:HGNC Symbol;Acc:HGNC:29557]	0.969085	0.573599	0.756581	0.628574	1.98369	-1.65803
ENSG00000163558	PRKCI	protein kinase C, iota [Source:HGNC Symbol;Acc:HGNC:9404]	1.69133	1.00154	0.755936	13.5346	16.1115	-0.251434
ENSG00000012232	EXTL3	exostosin-like glycosyltransferase 3 [Source:HGNC Symbol;Acc:HGNC:3518]	1.03275	0.611658	0.755686	20.9672	23.4821	-0.163427
ENSG00000165716	FAM69B	family with sequence similarity 69, member B [Source:HGNC Symbol;Acc:HGNC:28290]	1.23828	0.733566	0.755342	20.2471	32.2491	-0.671545
ENSG00000186174	BCL9L	B-cell CLL/lymphoma 9-like [Source:HGNC Symbol;Acc:HGNC:23688]	1.70228	1.00891	0.754673	8.5073	16.5918	-0.963698
ENSG00000087095	NLK	nemo-like kinase [Source:HGNC Symbol;Acc:HGNC:29858]	1.1343	0.672327	0.754564	23.4799	21.4808	0.128382
ENSG00000170837	GPR27	G protein-coupled receptor 27 [Source:HGNC Symbol;Acc:HGNC:4482]	1.36059	0.806464	0.754549	27.4899	58.8795	-1.09886
ENSG00000170604	IRF2BP1	interferon regulatory factor 2 binding protein 1 [Source:HGNC Symbol;Acc:HGNC:21728]	0.835301	0.495146	0.754443	22.1618	25.4773	-0.201136
ENSG00000171953	ATPAF2	ATP synthase mitochondrial F1 complex assembly factor 2 [Source:HGNC Symbol;Acc:HGNC:18802]	1.4855	0.880715	0.7542	7.24012	11.603	-0.680411
ENSG00000182154	MRPL41	mitochondrial ribosomal protein L41 [Source:HGNC Symbol;Acc:HGNC:14492]	1.06429	0.631083	0.753993	23.994	45.254	-0.91537
ENSG00000115137	DNAJC27	DnaJ (Hsp40) homolog, subfamily C, member 27 [Source:HGNC Symbol;Acc:HGNC:30290]	1.6247	0.963657	0.753587	3.98556	12.9613	-1.70136
ENSG00000135821	GLUL	glutamate-ammonia ligase [Source:HGNC Symbol;Acc:HGNC:4341]	1.28085	0.760484	0.752114	34.1186	158.697	-2.21765
ENSG00000275004	ZNF280B	zinc finger protein 280B [Source:HGNC Symbol;Acc:HGNC:23022]	0.974061	0.578463	0.751788	1.61896	2.15731	-0.414165
ENSG00000170892	TSEN34	TSEN34 tRNA splicing endonuclease subunit [Source:HGNC Symbol;Acc:HGNC:15506]	1.84019	1.09293	0.751663	17.6256	40.9761	-1.21711
ENSG00000166225	FRS2	fibroblast growth factor receptor substrate 2 [Source:HGNC Symbol;Acc:HGNC:16971]	1.31897	0.783426	0.751542	7.18645	8.76757	-0.286897
ENSG00000185344	ATP6V0A2	ATPase, H+ transporting, lysosomal V0 subunit a2 [Source:HGNC Symbol;Acc:HGNC:18481]	1.00052	0.594304	0.751475	3.95757	8.0073	-1.0167
ENSG00000169375	SIN3A	SIN3 transcription regulator family member A [Source:HGNC Symbol;Acc:HGNC:19353]	1.45912	0.867088	0.750851	11.6184	8.41116	0.466037
ENSG00000160209	PDXK	pyridoxal (pyridoxine, vitamin B6) kinase [Source:HGNC Symbol;Acc:HGNC:8819]	1.39202	0.827837	0.749763	22.403	13.9411	0.684349
ENSG00000155265	GOLGA7B	golgin A7 family, member B [Source:HGNC Symbol;Acc:HGNC:31668]	1.46894	0.873929	0.749187	11.6685	54.1527	-2.21442
ENSG00000135083	CCNJL	cyclin J-like [Source:HGNC Symbol;Acc:HGNC:25876]	0.928803	0.552841	0.748509	1.60821	1.68043	-0.0633716
ENSG00000162980	ARL5A	ADP-ribosylation factor-like 5A [Source:HGNC Symbol;Acc:HGNC:696]	1.19312	0.710295	0.748249	9.04559	23.9142	-1.40258
ENSG00000187764	SEMA4D	sema domain, immunoglobulin domain (Ig), transmembrane domain (TM) and short cytoplasmic domain, (semaphorin) 4D [Source:HGNC Symbol;Acc:HGNC:10732]	0.888103	0.528841	0.747893	10.5282	10.3197	0.0288593
ENSG00000146350	TBC1D32	TBC1 domain family, member 32 [Source:HGNC Symbol;Acc:HGNC:21485]	0.951607	0.56679	0.747552	3.88598	2.4822	0.646659
ENSG00000107371	EXOSC3	exosome component 3 [Source:HGNC Symbol;Acc:HGNC:17944]	1.04512	0.622585	0.747329	6.36682	7.21158	-0.179741
ENSG00000114331	ACAP2	ArfGAP with coiled-coil, ankyrin repeat and PH domains 2 [Source:HGNC Symbol;Acc:HGNC:16469]	1.34734	0.802785	0.74703	6.19127	10.8016	-0.802941
ENSG00000148158	SNX30	sorting nexin family member 30 [Source:HGNC Symbol;Acc:HGNC:23685]	1.33983	0.798381	0.746898	12.6223	8.48604	0.572806
ENSG00000174775	HRAS	Harvey rat sarcoma viral oncogene homolog [Source:HGNC Symbol;Acc:HGNC:5173]	1.47593	0.879555	0.746781	55.5529	50.3286	0.142483
ENSG00000175768	TOMM5	translocase of outer mitochondrial membrane 5 homolog (yeast) [Source:HGNC Symbol;Acc:HGNC:31369]	1.28892	0.76854	0.745969	4.68449	27.5516	-2.55617
ENSG00000116350	SRSF4	serine/arginine-rich splicing factor 4 [Source:HGNC Symbol;Acc:HGNC:10786]	1.42517	0.84978	0.745968	45.426	8.53351	2.41231
ENSG00000129245	FXR2	fragile X mental retardation, autosomal homolog 2 [Source:HGNC Symbol;Acc:HGNC:4024]	1.40339	0.837215	0.745249	34.9737	40.2229	-0.201745
ENSG00000143393	PI4KB	phosphatidylinositol 4-kinase, catalytic, beta [Source:HGNC Symbol;Acc:HGNC:8984]	1.45459	0.867868	0.74507	23.699	11.2875	1.0701
ENSG00000101438	SLC32A1	solute carrier family 32 (GABA vesicular transporter), member 1 [Source:HGNC Symbol;Acc:HGNC:11018]	1.85968	1.10956	0.745064	15.9396	52.5221	-1.72031
ENSG00000088899	LZTS3	Leucine zipper putative tumor suppressor 3 [Source:UniProtKB/Swiss-Prot;Acc:O60299]	1.22841	0.733584	0.743757	22.0707	15.6956	0.491776
ENSG00000198695	MT-ND6	mitochondrially encoded NADH dehydrogenase 6 [Source:HGNC Symbol;Acc:HGNC:7462]	0.956996	0.571571	0.743582	3128.49	1584.2	0.981709
ENSG00000140948	ZCCHC14	zinc finger, CCHC domain containing 14 [Source:HGNC Symbol;Acc:HGNC:24134]	1.27132	0.759847	0.742552	22.1818	27.6234	-0.316513
ENSG00000169180	XPO6	exportin 6 [Source:HGNC Symbol;Acc:HGNC:19733]	1.38013	0.825168	0.742043	31.0154	23.4405	0.403979
ENSG00000025772	TOMM34	translocase of outer mitochondrial membrane 34 [Source:HGNC Symbol;Acc:HGNC:15746]	1.13898	0.681299	0.741389	8.23248	12.4695	-0.599005
ENSG00000107130	NCS1	neuronal calcium sensor 1 [Source:HGNC Symbol;Acc:HGNC:3953]	1.41295	0.84522	0.741316	63.9033	58.6205	0.124484
ENSG00000069248	NUP133	nucleoporin 133kDa [Source:HGNC Symbol;Acc:HGNC:18016]	1.16646	0.697769	0.741314	17.1373	7.1521	1.2607
ENSG00000179988	PSTK	phosphoseryl-tRNA kinase [Source:HGNC Symbol;Acc:HGNC:28578]	0.714306	0.427419	0.740892	3.42374	6.20294	-0.857379
ENSG00000063660	GPC1	glypican 1 [Source:HGNC Symbol;Acc:HGNC:4449]	1.04136	0.623236	0.740617	81.2868	36.2439	1.16528
ENSG00000112787	FBRSL1	fibrosin-like 1 [Source:HGNC Symbol;Acc:HGNC:29308]	1.53502	0.918729	0.74055	25.1461	16.0344	0.649164
ENSG00000123360	PDE1B	phosphodiesterase 1B, calmodulin-dependent [Source:HGNC Symbol;Acc:HGNC:8775]	1.19078	0.712721	0.740498	15.0482	27.5256	-0.871179
ENSG00000260230	FRRS1L	ferric-chelate reductase 1-like [Source:HGNC Symbol;Acc:HGNC:1362]	1.18517	0.709373	0.740481	23.1332	21.377	0.1139
ENSG00000206418	RAB12	RAB12, member RAS oncogene family [Source:HGNC Symbol;Acc:HGNC:31332]	1.29306	0.77397	0.740443	31.8403	82.6409	-1.376
ENSG00000133612	AGAP3	ArfGAP with GTPase domain, ankyrin repeat and PH domain 3 [Source:HGNC Symbol;Acc:HGNC:16923]	2.37848	1.42376	0.74034	52.2284	108.433	-1.05389
ENSG00000166130	IKBIP	IKBKB interacting protein [Source:HGNC Symbol;Acc:HGNC:26430]	1.62616	0.973423	0.740331	3.82184	4.38592	-0.198612
ENSG00000135093	USP30	ubiquitin specific peptidase 30 [Source:HGNC Symbol;Acc:HGNC:20065]	0.968518	0.579781	0.74027	12.8259	9.48259	0.435709
ENSG00000163104	SMARCAD1	SWI/SNF-related, matrix-associated actin-dependent regulator of chromatin, subfamily a, containing DEAD/H box 1 [Source:HGNC Symbol;Acc:HGNC:18398]	0.969601	0.580439	0.740248	31.4869	10.0611	1.64596
ENSG00000112473	SLC39A7	solute carrier family 39 (zinc transporter), member 7 [Source:HGNC Symbol;Acc:HGNC:4927]	1.49505	0.895001	0.740228	67.882	5.21104	3.70339
ENSG00000196505	GDAP2	ganglioside induced differentiation associated protein 2 [Source:HGNC Symbol;Acc:HGNC:18010]	1.89869	1.13673	0.740108	1.40912	10.0275	-2.8311
ENSG00000102038	SMARCA1	SWI/SNF related, matrix associated, actin dependent regulator of chromatin, subfamily a, member 1 [Source:HGNC Symbol;Acc:HGNC:11097]	1.28116	0.767218	0.739748	54.0633	14.9912	1.85053
ENSG00000160218	TRAPPC10	trafficking protein particle complex 10 [Source:HGNC Symbol;Acc:HGNC:11868]	1.42896	0.855727	0.739741	6.34902	26.0788	-2.03827
ENSG00000135540	NHSL1	NHS-like 1 [Source:HGNC Symbol;Acc:HGNC:21021]	2.03642	1.21956	0.739672	3.43343	3.05689	0.167588
ENSG00000162522	KIAA1522	KIAA1522 [Source:HGNC Symbol;Acc:HGNC:29301]	1.67522	1.00327	0.739644	6.16847	4.34658	0.505032
ENSG00000243156	MICAL3	microtubule associated monooxygenase, calponin and LIM domain containing 3 [Source:HGNC Symbol;Acc:HGNC:24694]	1.20907	0.724448	0.738939	12.1764	11.8885	0.0345197
ENSG00000128585	MKLN1	muskelin 1, intracellular mediator containing kelch motifs [Source:HGNC Symbol;Acc:HGNC:7109]	1.7464	1.04666	0.738594	4.05578	6.58267	-0.698695
ENSG00000163686	ABHD6	abhydrolase domain containing 6 [Source:HGNC Symbol;Acc:HGNC:21398]	1.20522	0.722359	0.738508	9.7573	17.4815	-0.841277
ENSG00000111252	SH2B3	SH2B adaptor protein 3 [Source:HGNC Symbol;Acc:HGNC:29605]	1.19753	0.717938	0.738128	1.93196	3.48876	-0.852647
ENSG00000119231	SENP5	SUMO1/sentrin specific peptidase 5 [Source:HGNC Symbol;Acc:HGNC:28407]	1.34172	0.804573	0.737792	10.8371	12.1374	-0.163474
ENSG00000007944	MYLIP	myosin regulatory light chain interacting protein [Source:HGNC Symbol;Acc:HGNC:21155]	1.68488	1.01065	0.737363	2.24851	7.85477	-1.8046
ENSG00000075429	CACNG5	calcium channel, voltage-dependent, gamma subunit 5 [Source:HGNC Symbol;Acc:HGNC:1409]	1.09229	0.65523	0.737285	2.0255	9.98939	-2.30212
ENSG00000058453	CROCC	ciliary rootlet coiled-coil, rootletin [Source:HGNC Symbol;Acc:HGNC:21299]	0.891937	0.535077	0.737195	9.32378	4.97369	0.906598
ENSG00000117335	CD46	CD46 molecule, complement regulatory protein [Source:HGNC Symbol;Acc:HGNC:6953]	1.06941	0.64155	0.737176	13.5353	0.991146	3.77148
ENSG00000163083	INHBB	inhibin, beta B [Source:HGNC Symbol;Acc:HGNC:6067]	0.716543	0.429907	0.737028	4.8993	4.75419	0.043374
ENSG00000148082	SHC3	SHC (Src homology 2 domain containing) transforming protein 3 [Source:HGNC Symbol;Acc:HGNC:18181]	1.53766	0.922605	0.736954	19.2859	22.936	-0.250068
ENSG00000167196	FBXO22	F-box protein 22 [Source:HGNC Symbol;Acc:HGNC:13593]	1.23166	0.739059	0.736844	4.18798	21.2266	-2.34155
ENSG00000138190	EXOC6	exocyst complex component 6 [Source:HGNC Symbol;Acc:HGNC:23196]	0.981663	0.589298	0.736231	8.17623	27.9853	-1.77516
ENSG00000121864	ZNF639	zinc finger protein 639 [Source:HGNC Symbol;Acc:HGNC:30950]	1.29786	0.779213	0.73605	6.98376	10.14	-0.537981
ENSG00000100908	EMC9	ER membrane protein complex subunit 9 [Source:HGNC Symbol;Acc:HGNC:20273]	1.20658	0.724443	0.735978	16.4792	6.31045	1.38483
ENSG00000225968	ELFN1	extracellular leucine-rich repeat and fibronectin type III domain containing 1 [Source:HGNC Symbol;Acc:HGNC:33154]	1.22995	0.738631	0.735674	9.50722	7.33764	0.373707
ENSG00000182870	GALNT9	polypeptide N-acetylgalactosaminyltransferase 9 [Source:HGNC Symbol;Acc:HGNC:4131]	1.35612	0.814436	0.735613	5.46883	15.3138	-1.48553
ENSG00000086232	EIF2AK1	eukaryotic translation initiation factor 2-alpha kinase 1 [Source:HGNC Symbol;Acc:HGNC:24921]	1.16765	0.701378	0.735339	33.3556	17.7249	0.912153
ENSG00000139131	YARS2	tyrosyl-tRNA synthetase 2, mitochondrial [Source:HGNC Symbol;Acc:HGNC:24249]	1.40187	0.842196	0.735126	4.80064	7.19544	-0.583858
ENSG00000120690	ELF1	E74-like factor 1 (ets domain transcription factor) [Source:HGNC Symbol;Acc:HGNC:3316]	2.46214	1.4792	0.735094	1.83271	1.27771	0.52042
ENSG00000127399	LRRC61	leucine rich repeat containing 61 [Source:HGNC Symbol;Acc:HGNC:21704]	1.18629	0.712767	0.734959	9.81458	3.44664	1.50974
ENSG00000149930	TAOK2	TAO kinase 2 [Source:HGNC Symbol;Acc:HGNC:16835]	1.04488	0.627891	0.734749	31.1456	38.2073	-0.29482
ENSG00000088812	ATRN	attractin [Source:HGNC Symbol;Acc:HGNC:885]	1.24987	0.751215	0.734479	21.5214	31.1941	-0.535502
ENSG00000198815	FOXJ3	forkhead box J3 [Source:HGNC Symbol;Acc:HGNC:29178]	1.31071	0.7878	0.734447	17.5017	21.6864	-0.309295
ENSG00000136827	TOR1A	torsin family 1, member A (torsin A) [Source:HGNC Symbol;Acc:HGNC:3098]	1.01366	0.609495	0.733885	24.2108	22.8161	0.085602
ENSG00000064932	SBNO2	strawberry notch homolog 2 (Drosophila) [Source:HGNC Symbol;Acc:HGNC:29158]	1.27545	0.766991	0.733723	4.91426	6.08782	-0.30895
ENSG00000118276	B4GALT6	UDP-Gal:betaGlcNAc beta 1,4- galactosyltransferase, polypeptide 6 [Source:HGNC Symbol;Acc:HGNC:929]	1.25289	0.753674	0.733244	6.52372	45.2346	-2.79366
ENSG00000147234	FRMPD3	FERM and PDZ domain containing 3 [Source:HGNC Symbol;Acc:HGNC:29382]	1.54185	0.927607	0.733077	11.2173	1.08762	3.36648
ENSG00000186908	ZDHHC17	zinc finger, DHHC-type containing 17 [Source:HGNC Symbol;Acc:HGNC:18412]	1.04977	0.631931	0.732237	27.1782	23.3805	0.217147
ENSG00000224051	CPTP	ceramide-1-phosphate transfer protein [Source:HGNC Symbol;Acc:HGNC:28116]	1.0112	0.608958	0.731653	19.7099	8.21498	1.26259
ENSG00000136643	RPS6KC1	ribosomal protein S6 kinase, 52kDa, polypeptide 1 [Source:HGNC Symbol;Acc:HGNC:10439]	1.22602	0.738341	0.731623	10.7492	9.85971	0.124614
ENSG00000133619	KRBA1	KRAB-A domain containing 1 [Source:HGNC Symbol;Acc:HGNC:22228]	0.887788	0.534699	0.731489	7.40041	6.81927	0.117989
ENSG00000006062	MAP3K14	mitogen-activated protein kinase kinase kinase 14 [Source:HGNC Symbol;Acc:HGNC:6853]	1.35856	0.818776	0.730534	2.87206	1.18793	1.27364
ENSG00000167280	ENGASE	endo-beta-N-acetylglucosaminidase [Source:HGNC Symbol;Acc:HGNC:24622]	0.950815	0.573277	0.729932	9.43731	1.9373	2.28433
ENSG00000132718	SYT11	synaptotagmin XI [Source:HGNC Symbol;Acc:HGNC:19239]	1.53882	0.927842	0.72987	120.214	130.416	-0.117509
ENSG00000112200	ZNF451	zinc finger protein 451 [Source:HGNC Symbol;Acc:HGNC:21091]	0.970282	0.58509	0.729747	4.76105	7.50001	-0.655613
ENSG00000148468	FAM171A1	family with sequence similarity 171, member A1 [Source:HGNC Symbol;Acc:HGNC:23522]	1.05026	0.633331	0.729713	30.1516	20.8215	0.534159
ENSG00000156140	ADAMTS3	ADAM metallopeptidase with thrombospondin type 1 motif, 3 [Source:HGNC Symbol;Acc:HGNC:219]	1.52444	0.919343	0.729606	2.95931	5.87943	-0.990417
ENSG00000151502	VPS26B	VPS26 retromer complex component B [Source:HGNC Symbol;Acc:HGNC:28119]	1.29227	0.779409	0.729459	46.5368	27.154	0.777205
ENSG00000132196	HSD17B7	hydroxysteroid (17-beta) dehydrogenase 7 [Source:HGNC Symbol;Acc:HGNC:5215]	1.40784	0.849163	0.729369	5.04339	15.2513	-1.59647
ENSG00000176182	MYPOP	Myb-related transcription factor, partner of profilin [Source:HGNC Symbol;Acc:HGNC:20178]	1.12341	0.677764	0.729023	5.50142	6.76433	-0.298144
ENSG00000121289	CEP89	centrosomal protein 89kDa [Source:HGNC Symbol;Acc:HGNC:25907]	1.35711	0.819236	0.728191	12.0313	6.60344	0.8655
ENSG00000105643	ARRDC2	arrestin domain containing 2 [Source:HGNC Symbol;Acc:HGNC:25225]	1.24549	0.751872	0.728156	0.490227	4.69478	-3.25954
ENSG00000163171	CDC42EP3	CDC42 effector protein (Rho GTPase binding) 3 [Source:HGNC Symbol;Acc:HGNC:16943]	1.64168	0.991283	0.727805	9.70308	19.2923	-0.991509
ENSG00000067369	TP53BP1	tumor protein p53 binding protein 1 [Source:HGNC Symbol;Acc:HGNC:11999]	1.6752	1.0121	0.726987	17.9717	24.0243	-0.41877
ENSG00000124507	PACSIN1	protein kinase C and casein kinase substrate in neurons 1 [Source:HGNC Symbol;Acc:HGNC:8570]	1.16801	0.705761	0.726803	6.06513	44.0759	-2.86138
ENSG00000071462	WBSCR22	Williams Beuren syndrome chromosome region 22 [Source:HGNC Symbol;Acc:HGNC:16405]	1.46781	0.886972	0.726707	13.1304	14.214	-0.114398
ENSG00000140600	SH3GL3	SH3-domain GRB2-like 3 [Source:HGNC Symbol;Acc:HGNC:10832]	1.65133	0.997979	0.726547	22.182	18.8381	0.235736
ENSG00000081721	DUSP12	dual specificity phosphatase 12 [Source:HGNC Symbol;Acc:HGNC:3067]	1.28908	0.779344	0.72601	27.7575	5.1132	2.44058
ENSG00000147162	OGT	O-linked N-acetylglucosamine (GlcNAc) transferase [Source:HGNC Symbol;Acc:HGNC:8127]	1.65489	1.00056	0.725926	32.2301	58.3467	-0.85624
ENSG00000177932	ZNF354C	zinc finger protein 354C [Source:HGNC Symbol;Acc:HGNC:16736]	0.613582	0.37099	0.725875	8.47405	16.1096	-0.926799
ENSG00000138443	ABI2	abl-interactor 2 [Source:HGNC Symbol;Acc:HGNC:24011]	1.45863	0.882031	0.725717	13.8601	53.3327	-1.94408
ENSG00000150787	PTS	6-pyruvoyltetrahydropterin synthase [Source:HGNC Symbol;Acc:HGNC:9689]	1.58289	0.957434	0.725315	37.1995	16.566	1.16706
ENSG00000119684	MLH3	mutL homolog 3 [Source:HGNC Symbol;Acc:HGNC:7128]	0.496313	0.300226	0.725203	4.32881	3.32605	0.380159
ENSG00000117625	RCOR3	REST corepressor 3 [Source:HGNC Symbol;Acc:HGNC:25594]	0.887733	0.537096	0.724945	18.1267	7.62645	1.24903
ENSG00000104888	SLC17A7	solute carrier family 17 (vesicular glutamate transporter), member 7 [Source:HGNC Symbol;Acc:HGNC:16704]	1.56602	0.947518	0.724882	1.2581	201.704	-7.32485
ENSG00000187325	TAF9B	TAF9B RNA polymerase II, TATA box binding protein (TBP)-associated factor, 31kDa [Source:HGNC Symbol;Acc:HGNC:17306]	0.870263	0.526647	0.724615	17.778	9.96991	0.834439
ENSG00000203760	CENPW	centromere protein W [Source:HGNC Symbol;Acc:HGNC:21488]	1.42025	0.859626	0.72437	3.33442	4.09075	-0.294929
ENSG00000095002	MSH2	mutS homolog 2 [Source:HGNC Symbol;Acc:HGNC:7325]	1.06268	0.643424	0.723865	17.1503	6.95728	1.30164
ENSG00000168502	MTCL1	microtubule crosslinking factor 1 [Source:HGNC Symbol;Acc:HGNC:29121]	1.68855	1.02244	0.72377	7.38631	6.88914	0.10053
ENSG00000070495	JMJD6	jumonji domain containing 6 [Source:HGNC Symbol;Acc:HGNC:19355]	2.17341	1.31607	0.723728	11.2211	10.564	0.0870577
ENSG00000135503	ACVR1B	activin A receptor, type IB [Source:HGNC Symbol;Acc:HGNC:172]	0.958967	0.580829	0.723369	33.8765	39.306	-0.214466
ENSG00000196756	SNHG17	small nucleolar RNA host gene 17 [Source:HGNC Symbol;Acc:HGNC:48600]	1.61303	0.977045	0.723278	5.73837	4.18549	0.455247
ENSG00000162407	PPAP2B	phosphatidic acid phosphatase type 2B [Source:HGNC Symbol;Acc:HGNC:9229]	0.945984	0.573249	0.722654	54.6378	45.127	0.275908
ENSG00000142166	IFNAR1	interferon (alpha, beta and omega) receptor 1 [Source:HGNC Symbol;Acc:HGNC:5432]	0.80541	0.488153	0.72239	13.9157	16.8738	-0.278079
ENSG00000142453	CARM1	coactivator-associated arginine methyltransferase 1 [Source:HGNC Symbol;Acc:HGNC:23393]	1.17215	0.710675	0.72189	24.5693	22.6581	0.11683
ENSG00000150551	LYPD1	LY6/PLAUR domain containing 1 [Source:HGNC Symbol;Acc:HGNC:28431]	1.22406	0.742358	0.721488	17.0477	5.02364	1.76277
ENSG00000135823	STX6	syntaxin 6 [Source:HGNC Symbol;Acc:HGNC:11441]	1.44976	0.879237	0.721487	11.2976	16.2698	-0.526172
ENSG00000172031	EPHX4	epoxide hydrolase 4 [Source:HGNC Symbol;Acc:HGNC:23758]	1.70284	1.03288	0.721277	1.02524	9.79943	-3.25674
ENSG00000083168	KAT6A	K(lysine) acetyltransferase 6A [Source:HGNC Symbol;Acc:HGNC:13013]	1.08162	0.656131	0.721136	15.2279	11.4319	0.413652
ENSG00000126821	SGPP1	sphingosine-1-phosphate phosphatase 1 [Source:HGNC Symbol;Acc:HGNC:17720]	1.28299	0.778343	0.721034	4.93998	10.9818	-1.15254
ENSG00000121274	PAPD5	PAP associated domain containing 5 [Source:HGNC Symbol;Acc:HGNC:30758]	1.8966	1.15062	0.721006	5.35587	12.7502	-1.25132
ENSG00000198887	SMC5	structural maintenance of chromosomes 5 [Source:HGNC Symbol;Acc:HGNC:20465]	2.19669	1.33283	0.720841	7.71489	5.63108	0.454233
ENSG00000198729	PPP1R14C	protein phosphatase 1, regulatory (inhibitor) subunit 14C [Source:HGNC Symbol;Acc:HGNC:14952]	1.71455	1.04035	0.720759	11.3954	37.5652	-1.72095
ENSG00000189362	NEMP2	nuclear envelope integral membrane protein 2 [Source:HGNC Symbol;Acc:HGNC:33700]	0.958196	0.581435	0.720703	0.706767	1.17867	-0.737854
ENSG00000100241	SBF1	SET binding factor 1 [Source:HGNC Symbol;Acc:HGNC:10542]	1.44839	0.878996	0.720523	43.3967	37.476	0.211618
ENSG00000205084	TMEM231	transmembrane protein 231 [Source:HGNC Symbol;Acc:HGNC:37234]	0.895926	0.543969	0.719855	6.44845	4.20572	0.6166
ENSG00000176148	TCP11L1	t-complex 11, testis-specific-like 1 [Source:HGNC Symbol;Acc:HGNC:25655]	1.37737	0.836366	0.719709	4.4831	8.18503	-0.868492
ENSG00000182481	KPNA2	karyopherin alpha 2 (RAG cohort 1, importin alpha 1) [Source:HGNC Symbol;Acc:HGNC:6395]	2.6855	1.63075	0.719654	55.2779	15.6576	1.81984
ENSG00000068137	PLEKHH3	pleckstrin homology domain containing, family H (with MyTH4 domain) member 3 [Source:HGNC Symbol;Acc:HGNC:26105]	3.77816	2.29456	0.719466	7.12218	4.67304	0.607957
ENSG00000138757	G3BP2	GTPase activating protein (SH3 domain) binding protein 2 [Source:HGNC Symbol;Acc:HGNC:30291]	1.65146	1.00356	0.718609	72.8627	38.0881	0.93584
ENSG00000118197	DDX59	DEAD (Asp-Glu-Ala-Asp) box polypeptide 59 [Source:HGNC Symbol;Acc:HGNC:25360]	0.909727	0.552828	0.718603	3.8467	3.51204	0.13131
ENSG00000175213	ZNF408	zinc finger protein 408 [Source:HGNC Symbol;Acc:HGNC:20041]	0.972573	0.591181	0.718208	6.87563	5.02584	0.452127
ENSG00000183735	TBK1	TANK-binding kinase 1 [Source:HGNC Symbol;Acc:HGNC:11584]	1.27203	0.773586	0.717499	8.01348	14.4429	-0.849861
ENSG00000164024	METAP1	methionyl aminopeptidase 1 [Source:HGNC Symbol;Acc:HGNC:15789]	1.4748	0.89697	0.717383	16.1612	23.4347	-0.536118
ENSG00000170027	YWHAG	tyrosine 3-monooxygenase/tryptophan 5-monooxygenase activation protein, gamma [Source:HGNC Symbol;Acc:HGNC:12852]	1.62265	0.987603	0.716346	231.455	544.233	-1.23349
ENSG00000186318	BACE1	beta-site APP-cleaving enzyme 1 [Source:HGNC Symbol;Acc:HGNC:933]	0.98629	0.600356	0.716193	24.4235	24.9867	-0.0328876
ENSG00000171877	FRMD5	FERM domain containing 5 [Source:HGNC Symbol;Acc:HGNC:28214]	1.65598	1.00813	0.716006	7.49683	12.9415	-0.78765
ENSG00000113595	TRIM23	tripartite motif containing 23 [Source:HGNC Symbol;Acc:HGNC:660]	0.946375	0.576237	0.715749	14.2035	20.5041	-0.529663
ENSG00000111711	GOLT1B	golgi transport 1B [Source:HGNC Symbol;Acc:HGNC:20175]	1.11177	0.677018	0.715592	15.9323	16.8312	-0.0791785
ENSG00000166451	CENPN	centromere protein N [Source:HGNC Symbol;Acc:HGNC:30873]	2.00803	1.22297	0.715387	2.13266	0.971746	1.134
ENSG00000139977	NAA30	N(alpha)-acetyltransferase 30, NatC catalytic subunit [Source:HGNC Symbol;Acc:HGNC:19844]	1.22664	0.74716	0.715229	8.34187	11.0698	-0.408184
ENSG00000134461	ANKRD16	ankyrin repeat domain 16 [Source:HGNC Symbol;Acc:HGNC:23471]	0.972508	0.592495	0.714906	4.70157	10.0699	-1.09884
ENSG00000100056	DGCR14	DiGeorge syndrome critical region gene 14 [Source:HGNC Symbol;Acc:HGNC:16817]	1.081	0.658716	0.71464	7.93299	12.5025	-0.656276
ENSG00000104450	SPAG1	sperm associated antigen 1 [Source:HGNC Symbol;Acc:HGNC:11212]	1.11809	0.68135	0.714569	2.14678	2.81149	-0.389161
ENSG00000198888	MT-ND1	mitochondrially encoded NADH dehydrogenase 1 [Source:HGNC Symbol;Acc:HGNC:7455]	1.20685	0.735648	0.714164	1782.11	3055.89	-0.778001
ENSG00000123136	DDX39A	DEAD (Asp-Glu-Ala-Asp) box polypeptide 39A [Source:HGNC Symbol;Acc:HGNC:17821]	1.59073	0.969758	0.713997	32.5814	8.95278	1.86364
ENSG00000110427	KIAA1549L	KIAA1549-like [Source:HGNC Symbol;Acc:HGNC:24836]	0.954263	0.581811	0.713837	10.6441	16.336	-0.61801
ENSG00000100156	SLC16A8	solute carrier family 16 (monocarboxylate transporter), member 8 [Source:HGNC Symbol;Acc:HGNC:16270]	0.897944	0.54776	0.71308	1.53079	1.44966	0.0785645
ENSG00000103064	SLC7A6	solute carrier family 7 (amino acid transporter light chain, y+L system), member 6 [Source:HGNC Symbol;Acc:HGNC:11064]	1.36024	0.829802	0.713018	4.40657	8.21608	-0.898794
ENSG00000111670	GNPTAB	N-acetylglucosamine-1-phosphate transferase, alpha and beta subunits [Source:HGNC Symbol;Acc:HGNC:29670]	1.09691	0.669182	0.712975	27.1669	25.3802	0.0981474
ENSG00000165526	RPUSD4	RNA pseudouridylate synthase domain containing 4 [Source:HGNC Symbol;Acc:HGNC:25898]	1.19267	0.72774	0.712695	10.0082	4.13688	1.27457
ENSG00000144655	CSRNP1	cysteine-serine-rich nuclear protein 1 [Source:HGNC Symbol;Acc:HGNC:14300]	30.4216	18.5627	0.712691	1.19855	1.23881	-0.0476717
ENSG00000072071	ADGRL1	adhesion G protein-coupled receptor L1 [Source:HGNC Symbol;Acc:HGNC:20973]	1.48963	0.909772	0.711379	66.6323	78.2267	-0.23144
ENSG00000164818	DNAAF5	dynein, axonemal, assembly factor 5 [Source:HGNC Symbol;Acc:HGNC:26013]	1.15831	0.707786	0.710642	5.75292	3.38407	0.765535
ENSG00000177463	NR2C2	nuclear receptor subfamily 2, group C, member 2 [Source:HGNC Symbol;Acc:HGNC:7972]	1.00705	0.615419	0.710499	19.8503	9.99038	0.990551
ENSG00000078747	ITCH	itchy E3 ubiquitin protein ligase [Source:HGNC Symbol;Acc:HGNC:13890]	1.13218	0.692083	0.710084	8.02397	9.58655	-0.256695
ENSG00000163939	PBRM1	polybromo 1 [Source:HGNC Symbol;Acc:HGNC:30064]	1.35368	0.827536	0.70999	22.2244	13.4524	0.724282
ENSG00000078687	TNRC6C	trinucleotide repeat containing 6C [Source:HGNC Symbol;Acc:HGNC:29318]	1.11685	0.682903	0.709679	10.1458	13.0635	-0.364655
ENSG00000076944	STXBP2	syntaxin binding protein 2 [Source:HGNC Symbol;Acc:HGNC:11445]	1.43492	0.877592	0.709353	2.66618	18.2095	-2.77184
ENSG00000146414	SHPRH	SNF2 histone linker PHD RING helicase, E3 ubiquitin protein ligase [Source:HGNC Symbol;Acc:HGNC:19336]	0.827377	0.506123	0.709056	2.77355	7.53597	-1.44206
ENSG00000197114	ZGPAT	zinc finger, CCCH-type with G patch domain [Source:HGNC Symbol;Acc:HGNC:15948]	1.14122	0.698172	0.70892	4.0462	13.5725	-1.74604
ENSG00000081760	AACS	acetoacetyl-CoA synthetase [Source:HGNC Symbol;Acc:HGNC:21298]	1.21895	0.745887	0.708615	5.56223	74.0612	-3.73498
ENSG00000134294	SLC38A2	solute carrier family 38, member 2 [Source:HGNC Symbol;Acc:HGNC:13448]	3.78562	2.31668	0.708471	46.0665	34.6252	0.411896
ENSG00000179331	RAB39A	RAB39A, member RAS oncogene family [Source:HGNC Symbol;Acc:HGNC:16521]	2.3117	1.41476	0.708395	2.47594	0.586505	2.07776
ENSG00000126970	ZC4H2	zinc finger, C4H2 domain containing [Source:HGNC Symbol;Acc:HGNC:24931]	0.959659	0.587352	0.708297	11.0153	13.6434	-0.308688
ENSG00000085415	SEH1L	SEH1-like nucleoporin [Source:HGNC Symbol;Acc:HGNC:30379]	1.60882	0.984861	0.708009	5.66405	17.4557	-1.62379
ENSG00000181904	C5orf24	chromosome 5 open reading frame 24 [Source:HGNC Symbol;Acc:HGNC:26746]	1.10632	0.677262	0.707982	26.4624	39.2457	-0.568592
ENSG00000105355	PLIN3	perilipin 3 [Source:HGNC Symbol;Acc:HGNC:16893]	1.52574	0.934097	0.707861	7.83464	2.42595	1.69132
ENSG00000118960	HS1BP3	HCLS1 binding protein 3 [Source:HGNC Symbol;Acc:HGNC:24979]	0.785387	0.480851	0.707814	4.21066	4.06259	0.0516471
ENSG00000173598	NUDT4	nudix (nucleoside diphosphate linked moiety X)-type motif 4 [Source:HGNC Symbol;Acc:HGNC:8051]	1.89617	1.16102	0.707695	3.93087	132.474	-5.07472
ENSG00000171311	EXOSC1	exosome component 1 [Source:HGNC Symbol;Acc:HGNC:17286]	0.873461	0.534833	0.707654	7.21528	9.23643	-0.356279
ENSG00000137814	HAUS2	HAUS augmin-like complex, subunit 2 [Source:HGNC Symbol;Acc:HGNC:25530]	1.39912	0.856771	0.707539	5.85702	5.50093	0.0904923
ENSG00000119523	ALG2	ALG2, alpha-1,3/1,6-mannosyltransferase [Source:HGNC Symbol;Acc:HGNC:23159]	1.47538	0.903571	0.707381	6.55178	80.7418	-3.62336
ENSG00000100416	TRMU	tRNA 5-methylaminomethyl-2-thiouridylate methyltransferase [Source:HGNC Symbol;Acc:HGNC:25481]	1.03646	0.635057	0.706705	17.517	6.43127	1.44558
ENSG00000165156	ZHX1	zinc fingers and homeoboxes 1 [Source:HGNC Symbol;Acc:HGNC:12871]	1.26337	0.774289	0.706333	13.6419	13.8984	-0.0268729
ENSG00000169288	MRPL1	mitochondrial ribosomal protein L1 [Source:HGNC Symbol;Acc:HGNC:14275]	0.963967	0.590965	0.70591	16.2251	3.7958	2.09575
ENSG00000028528	SNX1	sorting nexin 1 [Source:HGNC Symbol;Acc:HGNC:11172]	1.22742	0.752644	0.705586	8.40091	22.2835	-1.40736
ENSG00000157833	GAREML	GRB2 associated, regulator of MAPK1-like [Source:HGNC Symbol;Acc:HGNC:27172]	1.11962	0.686547	0.705576	12.4088	3.39143	1.8714
ENSG00000148291	SURF2	surfeit 2 [Source:HGNC Symbol;Acc:HGNC:11475]	1.36301	0.836152	0.704959	22.2532	8.4376	1.39911
ENSG00000148343	FAM73B	family with sequence similarity 73, member B [Source:HGNC Symbol;Acc:HGNC:23621]	1.12207	0.688423	0.704794	10.1655	18.8687	-0.892309
ENSG00000104331	IMPAD1	inositol monophosphatase domain containing 1 [Source:HGNC Symbol;Acc:HGNC:26019]	1.17358	0.720448	0.703957	20.2059	27.059	-0.421335
ENSG00000210191	MT-TL2	mitochondrially encoded tRNA leucine 2 (CUN) [Source:HGNC Symbol;Acc:HGNC:7491]	1.01627	0.62423	0.70313	37.1571	11.1565	1.73575
ENSG00000174953	DHX36	DEAH (Asp-Glu-Ala-His) box polypeptide 36 [Source:HGNC Symbol;Acc:HGNC:14410]	1.15436	0.709135	0.702958	22.1873	22.6854	-0.0320304
ENSG00000168439	STIP1	stress-induced phosphoprotein 1 [Source:HGNC Symbol;Acc:HGNC:11387]	1.51398	0.93017	0.702776	66.8734	70.5356	-0.0769191
ENSG00000090975	PITPNM2	phosphatidylinositol transfer protein, membrane-associated 2 [Source:HGNC Symbol;Acc:HGNC:21044]	1.32112	0.811896	0.7024	7.26893	31.4842	-2.11481
ENSG00000135245	HILPDA	hypoxia inducible lipid droplet-associated [Source:HGNC Symbol;Acc:HGNC:28859]	0.884943	0.544056	0.701829	7.68876	5.45838	0.494279
ENSG00000196660	SLC30A10	solute carrier family 30, member 10 [Source:HGNC Symbol;Acc:HGNC:25355]	0.889154	0.546754	0.701541	4.50731	4.53269	-0.00810093
ENSG00000125149	C16orf70	chromosome 16 open reading frame 70 [Source:HGNC Symbol;Acc:HGNC:29564]	1.14575	0.704795	0.701021	10.2709	10.9689	-0.094856
ENSG00000182768	NGRN	neugrin, neurite outgrowth associated [Source:HGNC Symbol;Acc:HGNC:18077]	1.13831	0.700245	0.700965	23.3878	20.1524	0.214805
ENSG00000143847	PPFIA4	protein tyrosine phosphatase, receptor type, f polypeptide (PTPRF), interacting protein (liprin), alpha 4 [Source:HGNC Symbol;Acc:HGNC:9248]	1.36066	0.837323	0.700448	11.5077	17.0585	-0.567895
ENSG00000167977	KCTD5	potassium channel tetramerization domain containing 5 [Source:HGNC Symbol;Acc:HGNC:21423]	0.852917	0.524953	0.700218	25.1332	20.2369	0.312607
ENSG00000159128	IFNGR2	interferon gamma receptor 2 (interferon gamma transducer 1) [Source:HGNC Symbol;Acc:HGNC:5440]	1.21177	0.745874	0.700107	20.0192	36.2842	-0.857961
ENSG00000204590	GNL1	guanine nucleotide binding protein-like 1 [Source:HGNC Symbol;Acc:HGNC:4413]	2.32487	1.43105	0.700077	24.4163	50.9809	-1.06212
ENSG00000167110	GOLGA2	golgin A2 [Source:HGNC Symbol;Acc:HGNC:4425]	1.29649	0.7982	0.699788	24.5997	23.5946	0.060188
ENSG00000165322	ARHGAP12	Rho GTPase activating protein 12 [Source:HGNC Symbol;Acc:HGNC:16348]	1.30114	0.801132	0.699665	13.6723	12.9593	0.0772735
ENSG00000120159	CAAP1	caspase activity and apoptosis inhibitor 1 [Source:HGNC Symbol;Acc:HGNC:25834]	0.742658	0.457329	0.699464	6.69237	4.02091	0.734994
ENSG00000178385	PLEKHM3	pleckstrin homology domain containing, family M, member 3 [Source:HGNC Symbol;Acc:HGNC:34006]	1.11651	0.687584	0.699384	3.19143	3.2886	-0.0432704
ENSG00000180537	RNF182	ring finger protein 182 [Source:HGNC Symbol;Acc:HGNC:28522]	2.20949	1.36081	0.699252	8.53733	5.60065	0.608192
ENSG00000160408	ST6GALNAC6	ST6 (alpha-N-acetyl-neuraminyl-2,3-beta-galactosyl-1,3)-N-acetylgalactosaminide alpha-2,6-sialyltransferase 6 [Source:HGNC Symbol;Acc:HGNC:23364]	1.53144	0.943209	0.699241	17.9768	38.4957	-1.09856
ENSG00000126243	LRFN3	leucine rich repeat and fibronectin type III domain containing 3 [Source:HGNC Symbol;Acc:HGNC:28370]	0.851286	0.52435	0.699114	15.0896	19.9648	-0.403904
ENSG00000182208	MOB2	MOB kinase activator 2 [Source:HGNC Symbol;Acc:HGNC:24904]	1.44214	0.888639	0.698539	7.10437	10.923	-0.620593
ENSG00000210107	MT-TQ	mitochondrially encoded tRNA glutamine [Source:HGNC Symbol;Acc:HGNC:7495]	2.05748	1.2679	0.698436	2.33786	4.6615	-0.995603
ENSG00000087495	PHACTR3	phosphatase and actin regulator 3 [Source:HGNC Symbol;Acc:HGNC:15833]	1.69563	1.04526	0.697955	16.9704	32.4883	-0.936897
ENSG00000125875	TBC1D20	TBC1 domain family, member 20 [Source:HGNC Symbol;Acc:HGNC:16133]	1.32906	0.819299	0.697948	12.4509	20.4226	-0.71391
ENSG00000103148	NPRL3	NPR3-like, GATOR1 complex subunit [Source:HGNC Symbol;Acc:HGNC:14124]	0.960047	0.592016	0.69747	20.4904	6.17178	1.73119
ENSG00000064313	TAF2	TAF2 RNA polymerase II, TATA box binding protein (TBP)-associated factor, 150kDa [Source:HGNC Symbol;Acc:HGNC:11536]	1.19151	0.734865	0.697241	10.9614	10.2145	0.10181
ENSG00000174576	NPAS4	neuronal PAS domain protein 4 [Source:HGNC Symbol;Acc:HGNC:18983]	161.056	99.4084	0.696125	0.32272	3.48112	-3.4312
ENSG00000152684	PELO	pelota homolog (Drosophila) [Source:HGNC Symbol;Acc:HGNC:8829]	1.45573	0.898594	0.696002	5.86672	11.3989	-0.958269
ENSG00000130508	PXDN	peroxidasin [Source:HGNC Symbol;Acc:HGNC:14966]	1.29036	0.796583	0.695873	20.3206	5.57254	1.86653
ENSG00000089050	RBBP9	retinoblastoma binding protein 9 [Source:HGNC Symbol;Acc:HGNC:9892]	0.780987	0.482173	0.695748	8.81855	11.7447	-0.413399
ENSG00000141504	SAT2	spermidine/spermine N1-acetyltransferase family member 2 [Source:HGNC Symbol;Acc:HGNC:23160]	1.49436	0.922729	0.695549	45.3593	5.10106	3.15253
ENSG00000183684	ALYREF	Aly/REF export factor [Source:HGNC Symbol;Acc:HGNC:19071]	2.02131	1.24811	0.695542	31.1391	10.4084	1.58098
ENSG00000180817	PPA1	pyrophosphatase (inorganic) 1 [Source:HGNC Symbol;Acc:HGNC:9226]	1.45798	0.900325	0.695454	23.9218	53.7111	-1.1669
ENSG00000213672	NCKIPSD	NCK interacting protein with SH3 domain [Source:HGNC Symbol;Acc:HGNC:15486]	1.1079	0.684179	0.695386	7.76134	12.3844	-0.674153
ENSG00000160714	UBE2Q1	ubiquitin-conjugating enzyme E2Q family member 1 [Source:HGNC Symbol;Acc:HGNC:15698]	1.09984	0.679262	0.695253	32.2341	32.4374	-0.0090734
ENSG00000112078	KCTD20	potassium channel tetramerization domain containing 20 [Source:HGNC Symbol;Acc:HGNC:21052]	1.90067	1.17395	0.695143	18.2343	29.1508	-0.676884
ENSG00000119596	YLPM1	YLP motif containing 1 [Source:HGNC Symbol;Acc:HGNC:17798]	1.13262	0.699793	0.694667	27.1162	20.3494	0.414167
ENSG00000123575	FAM199X	family with sequence similarity 199, X-linked [Source:HGNC Symbol;Acc:HGNC:25195]	1.62989	1.00707	0.694606	22.7863	2.15563	3.40199
ENSG00000112541	PDE10A	phosphodiesterase 10A [Source:HGNC Symbol;Acc:HGNC:8772]	1.65991	1.02579	0.694369	9.77442	18.1493	-0.892829
ENSG00000273749	CYFIP1	cytoplasmic FMR1 interacting protein 1 [Source:HGNC Symbol;Acc:HGNC:13759]	1.18158	0.730333	0.694088	7.62217	13.2455	-0.797231
ENSG00000033170	FUT8	fucosyltransferase 8 (alpha (1,6) fucosyltransferase) [Source:HGNC Symbol;Acc:HGNC:4019]	0.987407	0.610431	0.693816	9.588	22.85	-1.2529
ENSG00000154118	JPH3	junctophilin 3 [Source:HGNC Symbol;Acc:HGNC:14203]	1.29934	0.803386	0.693608	20.0011	40.7409	-1.0264
ENSG00000105063	PPP6R1	protein phosphatase 6, regulatory subunit 1 [Source:HGNC Symbol;Acc:HGNC:29195]	1.62825	1.00682	0.693521	20.9522	43.5267	-1.0548
ENSG00000167136	ENDOG	endonuclease G [Source:HGNC Symbol;Acc:HGNC:3346]	1.11415	0.689219	0.692913	10.8284	5.92011	0.871126
ENSG00000132361	CLUH	clustered mitochondria (cluA/CLU1) homolog [Source:HGNC Symbol;Acc:HGNC:29094]	1.18665	0.734068	0.692905	14.3156	17.7596	-0.311015
ENSG00000176171	BNIP3	BCL2/adenovirus E1B 19kDa interacting protein 3 [Source:HGNC Symbol;Acc:HGNC:1084]	1.61269	0.997622	0.692902	54.1697	140.009	-1.36996
ENSG00000185670	ZBTB3	zinc finger and BTB domain containing 3 [Source:HGNC Symbol;Acc:HGNC:22918]	0.295254	0.1827	0.692485	1.88141	1.96398	-0.0619692
ENSG00000164610	RP9	retinitis pigmentosa 9 (autosomal dominant) [Source:HGNC Symbol;Acc:HGNC:10288]	1.37661	0.852148	0.691945	11.3956	24.0602	-1.07817
ENSG00000184307	ZDHHC23	zinc finger, DHHC-type containing 23 [Source:HGNC Symbol;Acc:HGNC:28654]	0.756179	0.468097	0.691919	0.867303	7.73653	-3.15708
ENSG00000167491	GATAD2A	GATA zinc finger domain containing 2A [Source:HGNC Symbol;Acc:HGNC:29989]	1.6412	1.01601	0.691831	9.93167	5.62894	0.819174
ENSG00000120868	APAF1	apoptotic peptidase activating factor 1 [Source:HGNC Symbol;Acc:HGNC:576]	1.12938	0.699198	0.691763	6.50987	8.40599	-0.368789
ENSG00000143156	NME7	NME/NM23 family member 7 [Source:HGNC Symbol;Acc:HGNC:20461]	1.17571	0.728055	0.69141	3.72657	6.204	-0.73535
ENSG00000173611	SCAI	suppressor of cancer cell invasion [Source:HGNC Symbol;Acc:HGNC:26709]	1.24873	0.773394	0.691192	3.47178	12.68	-1.86881
ENSG00000100603	SNW1	SNW domain containing 1 [Source:HGNC Symbol;Acc:HGNC:16696]	1.28943	0.798666	0.691064	22.1198	16.8556	0.392111
ENSG00000107929	LARP4B	La ribonucleoprotein domain family, member 4B [Source:HGNC Symbol;Acc:HGNC:28987]	1.24345	0.770312	0.690833	10.156	25.8984	-1.35053
ENSG00000116396	KCNC4	potassium channel, voltage gated Shaw related subfamily C, member 4 [Source:HGNC Symbol;Acc:HGNC:6236]	1.09548	0.678705	0.690711	2.20466	9.98929	-2.17983
ENSG00000109466	KLHL2	kelch-like family member 2 [Source:HGNC Symbol;Acc:HGNC:6353]	1.48831	0.922442	0.690146	19.5328	77.4872	-1.98806
ENSG00000130881	LRP3	low density lipoprotein receptor-related protein 3 [Source:HGNC Symbol;Acc:HGNC:6695]	1.44924	0.898309	0.690012	41.3864	33.571	0.301938
ENSG00000153395	LPCAT1	lysophosphatidylcholine acyltransferase 1 [Source:HGNC Symbol;Acc:HGNC:25718]	1.19389	0.740169	0.689748	37.1667	26.4535	0.490554
ENSG00000165886	UBTD1	ubiquitin domain containing 1 [Source:HGNC Symbol;Acc:HGNC:25683]	1.96213	1.21649	0.689701	6.08644	8.10935	-0.413986
ENSG00000140577	CRTC3	CREB regulated transcription coactivator 3 [Source:HGNC Symbol;Acc:HGNC:26148]	1.21428	0.753082	0.689224	8.53881	5.61895	0.603736
ENSG00000130956	HABP4	hyaluronan binding protein 4 [Source:HGNC Symbol;Acc:HGNC:17062]	1.79307	1.11206	0.689198	14.0968	35.3191	-1.32508
ENSG00000119900	OGFRL1	opioid growth factor receptor-like 1 [Source:HGNC Symbol;Acc:HGNC:21378]	1.01129	0.627243	0.689104	4.11219	15.0629	-1.87303
ENSG00000131061	ZNF341	zinc finger protein 341 [Source:HGNC Symbol;Acc:HGNC:15992]	0.554831	0.344153	0.688999	3.262	6.79639	-1.05901
ENSG00000105321	CCDC9	coiled-coil domain containing 9 [Source:HGNC Symbol;Acc:HGNC:24560]	1.75195	1.08675	0.68894	6.84629	11.3473	-0.728953
ENSG00000116957	TBCE	tubulin folding cofactor E [Source:HGNC Symbol;Acc:HGNC:11582]	1.06018	0.657656	0.6889	14.5626	22.1202	-0.603097
ENSG00000030110	BAK1	BCL2-antagonist/killer 1 [Source:HGNC Symbol;Acc:HGNC:949]	1.70023	1.05496	0.688551	4.29533	7.72281	-0.846358
ENSG00000277258	PCGF2	polycomb group ring finger 2 [Source:HGNC Symbol;Acc:HGNC:12929]	1.25345	0.777884	0.688272	24.808	28.757	-0.213109
ENSG00000177426	TGIF1	TGFB-induced factor homeobox 1 [Source:HGNC Symbol;Acc:HGNC:11776]	3.3431	2.07477	0.688235	2.98261	0.798507	1.9012
ENSG00000102886	GDPD3	glycerophosphodiester phosphodiesterase domain containing 3 [Source:HGNC Symbol;Acc:HGNC:28638]	1.80224	1.11859	0.688111	2.40917	0.53197	2.17912
ENSG00000159267	HLCS	holocarboxylase synthetase (biotin-(proprionyl-CoA-carboxylase (ATP-hydrolysing)) ligase) [Source:HGNC Symbol;Acc:HGNC:4976]	0.691168	0.429019	0.687995	3.89138	1.85548	1.06849
ENSG00000144645	OSBPL10	oxysterol binding protein-like 10 [Source:HGNC Symbol;Acc:HGNC:16395]	1.49352	0.927295	0.687616	0.703064	18.5842	-4.72428
ENSG00000161011	SQSTM1	sequestosome 1 [Source:HGNC Symbol;Acc:HGNC:11280]	2.31614	1.43806	0.687594	24.4311	138.818	-2.5064
ENSG00000102053	ZC3H12B	zinc finger CCCH-type containing 12B [Source:HGNC Symbol;Acc:HGNC:17407]	1.3004	0.807428	0.687546	2.31712	3.02361	-0.383941
ENSG00000185838	GNB1L	guanine nucleotide binding protein (G protein), beta polypeptide 1-like [Source:HGNC Symbol;Acc:HGNC:4397]	1.34409	0.834584	0.687502	1.17202	1.43807	-0.29514
ENSG00000148337	CIZ1	CDKN1A interacting zinc finger protein 1 [Source:HGNC Symbol;Acc:HGNC:16744]	1.21625	0.755255	0.687405	44.4304	12.626	1.81515
ENSG00000187051	RPS19BP1	ribosomal protein S19 binding protein 1 [Source:HGNC Symbol;Acc:HGNC:28749]	1.53707	0.954487	0.687384	16.2768	39.0465	-1.26238
ENSG00000090520	DNAJB11	DnaJ (Hsp40) homolog, subfamily B, member 11 [Source:HGNC Symbol;Acc:HGNC:14889]	1.64569	1.022	0.687305	18.5817	22.8081	-0.295667
ENSG00000108963	DPH1	diphthamide biosynthesis 1 [Source:HGNC Symbol;Acc:HGNC:3003]	0.807837	0.501685	0.687281	13.5372	4.15589	1.7037
ENSG00000126217	MCF2L	MCF.2 cell line derived transforming sequence-like [Source:HGNC Symbol;Acc:HGNC:14576]	0.84219	0.52306	0.687169	50.4106	43.0591	0.227411
ENSG00000100220	RTCB	RNA 2',3'-cyclic phosphate and 5'-OH ligase [Source:HGNC Symbol;Acc:HGNC:26935]	1.47996	0.919194	0.687119	35.9771	54.982	-0.611882
ENSG00000185803	SLC52A2	solute carrier family 52 (riboflavin transporter), member 2 [Source:HGNC Symbol;Acc:HGNC:30224]	1.1395	0.707752	0.687087	15.7391	6.8433	1.20159
ENSG00000066117	SMARCD1	SWI/SNF related, matrix associated, actin dependent regulator of chromatin, subfamily d, member 1 [Source:HGNC Symbol;Acc:HGNC:11106]	0.828603	0.51467	0.687033	36.2931	41.4775	-0.192632
ENSG00000167106	FAM102A	family with sequence similarity 102, member A [Source:HGNC Symbol;Acc:HGNC:31419]	1.43759	0.892944	0.687009	8.00299	6.12708	0.385338
ENSG00000123643	SLC36A1	solute carrier family 36 (proton/amino acid symporter), member 1 [Source:HGNC Symbol;Acc:HGNC:18761]	1.02414	0.636279	0.686678	8.7734	10.2459	-0.223841
ENSG00000188895	MSL1	male-specific lethal 1 homolog (Drosophila) [Source:HGNC Symbol;Acc:HGNC:27905]	1.57743	0.98006	0.686633	50.9116	41.0704	0.309897
ENSG00000133065	SLC41A1	solute carrier family 41 (magnesium transporter), member 1 [Source:HGNC Symbol;Acc:HGNC:19429]	1.87773	1.16685	0.686367	8.04067	11.6306	-0.532536
ENSG00000064300	NGFR	nerve growth factor receptor [Source:HGNC Symbol;Acc:HGNC:7809]	1.41572	0.879809	0.686277	2.04774	2.20017	-0.103586
ENSG00000159459	UBR1	ubiquitin protein ligase E3 component n-recognin 1 [Source:HGNC Symbol;Acc:HGNC:16808]	1.05908	0.658189	0.686232	9.63918	9.86435	-0.033313
ENSG00000009335	UBE3C	ubiquitin protein ligase E3C [Source:HGNC Symbol;Acc:HGNC:16803]	1.31429	0.816927	0.686007	16.5784	32.2345	-0.959304
ENSG00000196976	LAGE3	L antigen family, member 3 [Source:HGNC Symbol;Acc:HGNC:26058]	1.5525	0.965084	0.685869	15.992	6.74793	1.24483
ENSG00000151729	SLC25A4	solute carrier family 25 (mitochondrial carrier; adenine nucleotide translocator), member 4 [Source:HGNC Symbol;Acc:HGNC:10990]	1.65396	1.02848	0.685414	26.8775	382.047	-3.82928
ENSG00000169564	PCBP1	poly(rC) binding protein 1 [Source:HGNC Symbol;Acc:HGNC:8647]	1.18846	0.739181	0.685098	69.418	92.359	-0.411942
ENSG00000175764	TTLL11	tubulin tyrosine ligase-like family member 11 [Source:HGNC Symbol;Acc:HGNC:18113]	1.29009	0.802499	0.684905	4.65473	6.09076	-0.387926
ENSG00000171206	TRIM8	tripartite motif containing 8 [Source:HGNC Symbol;Acc:HGNC:15579]	1.49337	0.929264	0.684415	33.8244	32.2369	0.0693541
ENSG00000121579	NAA50	N(alpha)-acetyltransferase 50, NatE catalytic subunit [Source:HGNC Symbol;Acc:HGNC:29533]	1.70712	1.06266	0.68388	12.6707	23.02	-0.861393
ENSG00000166266	CUL5	cullin 5 [Source:HGNC Symbol;Acc:HGNC:2556]	0.969805	0.603729	0.683794	10.4853	9.89688	0.0833202
ENSG00000111913	FAM65B	family with sequence similarity 65, member B [Source:HGNC Symbol;Acc:HGNC:13872]	1.40082	0.872095	0.683716	7.9784	11.2433	-0.494894
ENSG00000124802	EEF1E1	eukaryotic translation elongation factor 1 epsilon 1 [Source:HGNC Symbol;Acc:HGNC:3212]	1.1145	0.693877	0.683641	15.2737	42.8079	-1.48682
ENSG00000157933	SKI	SKI proto-oncogene [Source:HGNC Symbol;Acc:HGNC:10896]	1.9217	1.19645	0.683629	21.3988	42.4982	-0.989875
ENSG00000144741	SLC25A26	solute carrier family 25 (S-adenosylmethionine carrier), member 26 [Source:HGNC Symbol;Acc:HGNC:20661]	1.0185	0.634218	0.683396	3.17928	4.88951	-0.620992
ENSG00000080854	IGSF9B	immunoglobulin superfamily, member 9B [Source:HGNC Symbol;Acc:HGNC:32326]	2.5243	1.57215	0.683144	3.98392	2.53011	0.654988
ENSG00000108100	CCNY	cyclin Y [Source:HGNC Symbol;Acc:HGNC:23354]	1.30371	0.812229	0.682666	16.9378	34.6325	-1.03188
ENSG00000119707	RBM25	RNA binding motif protein 25 [Source:HGNC Symbol;Acc:HGNC:23244]	1.26894	0.790588	0.682629	29.187	35.5941	-0.286311
ENSG00000247596	TWF2	twinfilin actin binding protein 2 [Source:HGNC Symbol;Acc:HGNC:9621]	0.801899	0.499637	0.682539	10.6103	20.1292	-0.923818
ENSG00000077514	POLD3	polymerase (DNA-directed), delta 3, accessory subunit [Source:HGNC Symbol;Acc:HGNC:20932]	1.26516	0.789057	0.68112	6.03319	9.25718	-0.617653
ENSG00000137500	CCDC90B	coiled-coil domain containing 90B [Source:HGNC Symbol;Acc:HGNC:28108]	0.769705	0.480097	0.680981	22.7902	6.91497	1.72062
ENSG00000110811	P3H3	prolyl 3-hydroxylase 3 [Source:HGNC Symbol;Acc:HGNC:19318]	1.53133	0.955257	0.680825	11.4111	10.7151	0.0907957
ENSG00000111790	FGFR1OP2	FGFR1 oncogene partner 2 [Source:HGNC Symbol;Acc:HGNC:23098]	1.39873	0.872762	0.680455	11.9793	12.3214	-0.0406159
ENSG00000153574	RPIA	ribose 5-phosphate isomerase A [Source:HGNC Symbol;Acc:HGNC:10297]	1.21639	0.759004	0.680425	10.3606	2.84012	1.86709
ENSG00000099999	RNF215	ring finger protein 215 [Source:HGNC Symbol;Acc:HGNC:33434]	0.722186	0.45082	0.679818	5.49059	19.954	-1.86165
ENSG00000163681	SLMAP	sarcolemma associated protein [Source:HGNC Symbol;Acc:HGNC:16643]	1.22487	0.764653	0.679756	6.42294	17.6106	-1.45514
ENSG00000274180	NATD1	N-acetyltransferase domain containing 1 [Source:HGNC Symbol;Acc:HGNC:30770]	1.04428	0.652107	0.679325	4.39096	5.93372	-0.434399
ENSG00000198961	PJA2	praja ring finger 2, E3 ubiquitin protein ligase [Source:HGNC Symbol;Acc:HGNC:17481]	1.2828	0.801062	0.679308	102.693	118.524	-0.206846
ENSG00000114098	ARMC8	armadillo repeat containing 8 [Source:HGNC Symbol;Acc:HGNC:24999]	1.23613	0.771983	0.67919	15.4286	20.7766	-0.429356
ENSG00000108306	FBXL20	F-box and leucine-rich repeat protein 20 [Source:HGNC Symbol;Acc:HGNC:24679]	1.16126	0.725282	0.67908	3.27196	6.75724	-1.04628
ENSG00000035681	NSMAF	neutral sphingomyelinase (N-SMase) activation associated factor [Source:HGNC Symbol;Acc:HGNC:8017]	1.29115	0.806463	0.678973	10.079	6.05506	0.735135
ENSG00000104142	VPS18	vacuolar protein sorting 18 homolog (S. cerevisiae) [Source:HGNC Symbol;Acc:HGNC:15972]	1.51721	0.94776	0.678832	12.9549	13.3263	-0.0407797
ENSG00000148384	INPP5E	inositol polyphosphate-5-phosphatase, 72 kDa [Source:HGNC Symbol;Acc:HGNC:21474]	1.12448	0.702608	0.678471	18.1073	5.75982	1.65248
ENSG00000157036	EXOG	endo/exonuclease (5'-3'), endonuclease G-like [Source:HGNC Symbol;Acc:HGNC:3347]	1.1323	0.707596	0.678261	9.11593	9.26256	-0.0230211
ENSG00000120324	PCDHB10	protocadherin beta 10 [Source:HGNC Symbol;Acc:HGNC:8681]	1.27998	0.799895	0.678234	5.31769	2.35086	1.17761
ENSG00000143126	CELSR2	cadherin, EGF LAG seven-pass G-type receptor 2 [Source:HGNC Symbol;Acc:HGNC:3231]	1.00529	0.628303	0.678073	27.3766	29.339	-0.0998759
ENSG00000171928	TVP23B	trans-golgi network vesicle protein 23 homolog B (S. cerevisiae) [Source:HGNC Symbol;Acc:HGNC:20399]	1.08993	0.681275	0.677929	4.24007	13.5779	-1.6791
ENSG00000074071	MRPS34	mitochondrial ribosomal protein S34 [Source:HGNC Symbol;Acc:HGNC:16618]	1.20042	0.750426	0.677753	46.2846	5.82606	2.98994
ENSG00000204227	RING1	ring finger protein 1 [Source:HGNC Symbol;Acc:HGNC:10018]	0.967887	0.605109	0.677644	50.7973	7.33679	2.79153
ENSG00000173065	FAM222B	family with sequence similarity 222, member B [Source:HGNC Symbol;Acc:HGNC:25563]	1.21154	0.75758	0.677373	15.1649	10.0483	0.59378
ENSG00000097033	SH3GLB1	SH3-domain GRB2-like endophilin B1 [Source:HGNC Symbol;Acc:HGNC:10833]	1.46525	0.916244	0.677343	30.3514	35.4143	-0.222568
ENSG00000117475	BLZF1	basic leucine zipper nuclear factor 1 [Source:HGNC Symbol;Acc:HGNC:1065]	1.32384	0.827844	0.677296	6.84334	5.56922	0.297225
ENSG00000137266	SLC22A23	solute carrier family 22, member 23 [Source:HGNC Symbol;Acc:HGNC:21106]	1.35386	0.84677	0.677034	13.7362	21.9303	-0.674943
ENSG00000003249	DBNDD1	dysbindin (dystrobrevin binding protein 1) domain containing 1 [Source:HGNC Symbol;Acc:HGNC:28455]	1.30581	0.81673	0.677011	22.7247	22.5852	0.0088841
ENSG00000163605	PPP4R2	protein phosphatase 4, regulatory subunit 2 [Source:HGNC Symbol;Acc:HGNC:18296]	1.55479	0.972532	0.676906	13.0015	13.117	-0.012762
ENSG00000118503	TNFAIP3	tumor necrosis factor, alpha-induced protein 3 [Source:HGNC Symbol;Acc:HGNC:11896]	2.32059	1.45168	0.676767	0.771591	0.825933	-0.0981876
ENSG00000132388	UBE2G1	ubiquitin-conjugating enzyme E2G 1 [Source:HGNC Symbol;Acc:HGNC:12482]	1.75134	1.09593	0.676307	15.5643	26.8552	-0.786963
ENSG00000134698	AGO4	argonaute RISC catalytic component 4 [Source:HGNC Symbol;Acc:HGNC:18424]	1.01187	0.63333	0.676001	12.9776	2.29539	2.49921
ENSG00000131437	KIF3A	kinesin family member 3A [Source:HGNC Symbol;Acc:HGNC:6319]	1.377	0.861911	0.675919	27.3502	66.723	-1.28663
ENSG00000136152	COG3	component of oligomeric golgi complex 3 [Source:HGNC Symbol;Acc:HGNC:18619]	0.937439	0.587193	0.67489	13.8705	9.36121	0.567251
ENSG00000166529	ZSCAN21	zinc finger and SCAN domain containing 21 [Source:HGNC Symbol;Acc:HGNC:13104]	0.762653	0.477879	0.674381	4.8922	8.57153	-0.809069
ENSG00000135968	GCC2	GRIP and coiled-coil domain containing 2 [Source:HGNC Symbol;Acc:HGNC:23218]	0.924829	0.5795	0.674377	4.98159	9.27445	-0.896657
ENSG00000151849	CENPJ	centromere protein J [Source:HGNC Symbol;Acc:HGNC:17272]	0.809529	0.507258	0.674363	5.95872	1.19965	2.31239
ENSG00000163875	MEAF6	MYST/Esa1-associated factor 6 [Source:HGNC Symbol;Acc:HGNC:25674]	1.40087	0.877878	0.674231	52.4413	27.3012	0.941738
ENSG00000213160	KLHL23	kelch-like family member 23 [Source:HGNC Symbol;Acc:HGNC:27506]	1.64382	1.03028	0.67402	19.6187	38.7636	-0.982474
ENSG00000144827	ABHD10	abhydrolase domain containing 10 [Source:HGNC Symbol;Acc:HGNC:25656]	0.86309	0.540971	0.673961	24.6579	4.92269	2.32453
ENSG00000215271	HOMEZ	homeobox and leucine zipper encoding [Source:HGNC Symbol;Acc:HGNC:20164]	0.459552	0.288065	0.673835	1.70139	2.52452	-0.569293
ENSG00000101193	GID8	GID complex subunit 8 [Source:HGNC Symbol;Acc:HGNC:15857]	0.99265	0.622415	0.673408	26.6719	20.8623	0.354423
ENSG00000163877	SNIP1	Smad nuclear interacting protein 1 [Source:HGNC Symbol;Acc:HGNC:30587]	1.10956	0.695785	0.673276	5.47837	6.83048	-0.318239
ENSG00000006576	PHTF2	putative homeodomain transcription factor 2 [Source:HGNC Symbol;Acc:HGNC:13411]	1.458	0.914361	0.673159	8.87155	10.3321	-0.219872
ENSG00000116793	PHTF1	putative homeodomain transcription factor 1 [Source:HGNC Symbol;Acc:HGNC:8939]	1.03076	0.646574	0.672819	7.69823	6.71973	0.196124
ENSG00000210196	MT-TP	mitochondrially encoded tRNA proline [Source:HGNC Symbol;Acc:HGNC:7494]	1.32058	0.828433	0.67271	452.041	474.509	-0.069982
ENSG00000166860	ZBTB39	zinc finger and BTB domain containing 39 [Source:HGNC Symbol;Acc:HGNC:29014]	0.698655	0.438344	0.672517	5.83473	2.2156	1.39697
ENSG00000166133	RPUSD2	RNA pseudouridylate synthase domain containing 2 [Source:HGNC Symbol;Acc:HGNC:24180]	0.569825	0.35764	0.672013	5.13962	1.47586	1.8001
ENSG00000100711	ZFYVE21	zinc finger, FYVE domain containing 21 [Source:HGNC Symbol;Acc:HGNC:20760]	0.870864	0.546664	0.671794	7.09418	6.50547	0.124983
ENSG00000119725	ZNF410	zinc finger protein 410 [Source:HGNC Symbol;Acc:HGNC:20144]	1.46956	0.922503	0.671754	0.585863	7.76438	-3.72823
ENSG00000074047	GLI2	GLI family zinc finger 2 [Source:HGNC Symbol;Acc:HGNC:4318]	1.15881	0.727773	0.671083	2.66314	0.935835	1.5088
ENSG00000170632	ARMC10	armadillo repeat containing 10 [Source:HGNC Symbol;Acc:HGNC:21706]	0.937167	0.588629	0.670946	11.4017	14.9848	-0.394243
ENSG00000171604	CXXC5	CXXC finger protein 5 [Source:HGNC Symbol;Acc:HGNC:26943]	1.33971	0.841473	0.670933	36.1379	11.0421	1.7105
ENSG00000139998	RAB15	RAB15, member RAS oncogene family [Source:HGNC Symbol;Acc:HGNC:20150]	1.40424	0.882082	0.67081	33.0568	41.4841	-0.327611
ENSG00000122729	ACO1	aconitase 1, soluble [Source:HGNC Symbol;Acc:HGNC:117]	1.1222	0.705141	0.670348	3.13286	18.4597	-2.55882
ENSG00000168137	SETD5	SET domain containing 5 [Source:HGNC Symbol;Acc:HGNC:25566]	1.18169	0.742796	0.669808	24.8749	25.812	-0.0533479
ENSG00000165185	KIAA1958	KIAA1958 [Source:HGNC Symbol;Acc:HGNC:23427]	1.72627	1.08538	0.669459	2.8206	0.88384	1.67415
ENSG00000141428	C18orf21	chromosome 18 open reading frame 21 [Source:HGNC Symbol;Acc:HGNC:28802]	1.00526	0.632074	0.669406	10.0764	11.3861	-0.176294
ENSG00000214357	NEURL1B	neuralized E3 ubiquitin protein ligase 1B [Source:HGNC Symbol;Acc:HGNC:35422]	0.779362	0.490071	0.669302	1.50067	9.25131	-2.62405
ENSG00000143970	ASXL2	additional sex combs like transcriptional regulator 2 [Source:HGNC Symbol;Acc:HGNC:23805]	1.41215	0.888156	0.669012	2.02486	2.14419	-0.0826121
ENSG00000159069	FBXW5	F-box and WD repeat domain containing 5 [Source:HGNC Symbol;Acc:HGNC:13613]	1.36419	0.858245	0.66858	48.9917	42.7577	0.196355
ENSG00000205213	LGR4	leucine-rich repeat containing G protein-coupled receptor 4 [Source:HGNC Symbol;Acc:HGNC:13299]	1.15342	0.725906	0.668069	14.6997	5.97189	1.29953
ENSG00000274211	SOCS7	suppressor of cytokine signaling 7 [Source:HGNC Symbol;Acc:HGNC:29846]	1.8776	1.18179	0.667912	15.3529	24.2418	-0.65899
ENSG00000071539	TRIP13	thyroid hormone receptor interactor 13 [Source:HGNC Symbol;Acc:HGNC:12307]	1.04187	0.65581	0.667827	6.86788	0.913514	2.91037
ENSG00000176208	ATAD5	ATPase family, AAA domain containing 5 [Source:HGNC Symbol;Acc:HGNC:25752]	0.977496	0.615383	0.667606	1.50881	1.1461	0.396679
ENSG00000197747	S100A10	S100 calcium binding protein A10 [Source:HGNC Symbol;Acc:HGNC:10487]	1.66235	1.04654	0.667603	8.05647	39.7649	-2.30328
ENSG00000159596	TMEM69	transmembrane protein 69 [Source:HGNC Symbol;Acc:HGNC:28035]	0.629735	0.396526	0.667331	8.70307	3.16925	1.45738
ENSG00000135622	SEMA4F	sema domain, immunoglobulin domain (Ig), transmembrane domain (TM) and short cytoplasmic domain, (semaphorin) 4F [Source:HGNC Symbol;Acc:HGNC:10734]	1.01267	0.637673	0.667278	9.88671	21.0193	-1.08815
ENSG00000120327	PCDHB14	protocadherin beta 14 [Source:HGNC Symbol;Acc:HGNC:8685]	1.30456	0.821507	0.667213	5.84844	4.26006	0.457179
ENSG00000144381	HSPD1	heat shock 60kDa protein 1 (chaperonin) [Source:HGNC Symbol;Acc:HGNC:5261]	1.50602	0.94858	0.6669	104.31	77.0511	0.436987
ENSG00000109911	ELP4	elongator acetyltransferase complex subunit 4 [Source:HGNC Symbol;Acc:HGNC:1171]	1.00386	0.632376	0.666705	6.94813	4.84234	0.520922
ENSG00000148296	SURF6	surfeit 6 [Source:HGNC Symbol;Acc:HGNC:11478]	0.801791	0.505094	0.666675	14.4035	8.8328	0.705479
ENSG00000077232	DNAJC10	DnaJ (Hsp40) homolog, subfamily C, member 10 [Source:HGNC Symbol;Acc:HGNC:24637]	0.900783	0.567503	0.666552	5.29375	28.2523	-2.41601
ENSG00000183723	CMTM4	CKLF-like MARVEL transmembrane domain containing 4 [Source:HGNC Symbol;Acc:HGNC:19175]	1.34268	0.845915	0.666526	8.38545	15.3476	-0.87205
ENSG00000167625	ZNF526	zinc finger protein 526 [Source:HGNC Symbol;Acc:HGNC:29415]	0.662746	0.417603	0.666326	2.35091	2.09802	0.164194
ENSG00000165688	PMPCA	peptidase (mitochondrial processing) alpha [Source:HGNC Symbol;Acc:HGNC:18667]	1.46803	0.925377	0.665767	16.3234	32.0946	-0.975389
ENSG00000130935	NOL11	nucleolar protein 11 [Source:HGNC Symbol;Acc:HGNC:24557]	0.990685	0.624571	0.665559	15.4381	10.253	0.590443
ENSG00000122591	FAM126A	family with sequence similarity 126, member A [Source:HGNC Symbol;Acc:HGNC:24587]	1.9747	1.24506	0.665423	3.11505	17.9258	-2.52471
ENSG00000108587	GOSR1	golgi SNAP receptor complex member 1 [Source:HGNC Symbol;Acc:HGNC:4430]	0.658611	0.415278	0.66535	8.69594	11.4132	-0.392292
ENSG00000100084	HIRA	histone cell cycle regulator [Source:HGNC Symbol;Acc:HGNC:4916]	1.28289	0.80907	0.665065	6.488	8.37519	-0.368348
ENSG00000120071	KANSL1	KAT8 regulatory NSL complex subunit 1 [Source:HGNC Symbol;Acc:HGNC:24565]	1.08348	0.683312	0.665061	11.4713	21.245	-0.889097
ENSG00000006695	COX10	COX10 heme A:farnesyltransferase cytochrome c oxidase assembly factor [Source:HGNC Symbol;Acc:HGNC:2260]	1.09444	0.690308	0.664883	5.57208	8.40723	-0.593416
ENSG00000124313	IQSEC2	IQ motif and Sec7 domain 2 [Source:HGNC Symbol;Acc:HGNC:29059]	1.45372	0.917058	0.664666	5.4497	24.6067	-2.1748
ENSG00000154001	PPP2R5E	protein phosphatase 2, regulatory subunit B', epsilon isoform [Source:HGNC Symbol;Acc:HGNC:9313]	1.38271	0.87234	0.664537	15.9439	36.3167	-1.18763
ENSG00000144057	ST6GAL2	ST6 beta-galactosamide alpha-2,6-sialyltranferase 2 [Source:HGNC Symbol;Acc:HGNC:10861]	0.662912	0.418323	0.664199	18.7633	35.0203	-0.900283
ENSG00000197785	ATAD3A	ATPase family, AAA domain containing 3A [Source:HGNC Symbol;Acc:HGNC:25567]	1.26175	0.796295	0.664056	11.1285	22.9934	-1.04696
ENSG00000196455	PIK3R4	phosphoinositide-3-kinase, regulatory subunit 4 [Source:HGNC Symbol;Acc:HGNC:8982]	0.922065	0.581925	0.664036	5.61857	8.6489	-0.622314
ENSG00000125944	HNRNPR	heterogeneous nuclear ribonucleoprotein R [Source:HGNC Symbol;Acc:HGNC:5047]	1.31476	0.829829	0.66391	35.4432	5.98865	2.56521
ENSG00000138867	GUCD1	guanylyl cyclase domain containing 1 [Source:HGNC Symbol;Acc:HGNC:14237]	0.674857	0.425951	0.663894	8.78836	5.22848	0.749203
ENSG00000067533	RRP15	ribosomal RNA processing 15 homolog [Source:HGNC Symbol;Acc:HGNC:24255]	1.07407	0.678068	0.663584	2.89056	3.72722	-0.366751
ENSG00000102870	ZNF629	zinc finger protein 629 [Source:HGNC Symbol;Acc:HGNC:29008]	0.736093	0.464785	0.663325	14.8772	6.58926	1.17491
ENSG00000241697	TMEFF1	transmembrane protein with EGF-like and two follistatin-like domains 1 [Source:HGNC Symbol;Acc:HGNC:11866]	1.52016	0.960079	0.662999	7.94231	103.8	-3.70811
ENSG00000162004	CCDC78	coiled-coil domain containing 78 [Source:HGNC Symbol;Acc:HGNC:14153]	0.851514	0.537965	0.662518	10.998	0.856981	3.68184
ENSG00000203485	INF2	inverted formin, FH2 and WH2 domain containing [Source:HGNC Symbol;Acc:HGNC:23791]	1.23191	0.778304	0.66249	3.8928	11.8024	-1.6002
ENSG00000110851	PRDM4	PR domain containing 4 [Source:HGNC Symbol;Acc:HGNC:9348]	1.63075	1.03036	0.662389	15.6592	15.4776	0.0168348
ENSG00000032742	IFT88	intraflagellar transport 88 [Source:HGNC Symbol;Acc:HGNC:20606]	0.860451	0.543802	0.662013	7.37923	4.82671	0.612431
ENSG00000116954	RRAGC	Ras-related GTP binding C [Source:HGNC Symbol;Acc:HGNC:19902]	1.94052	1.2266	0.661778	10.1288	21.6524	-1.09606
ENSG00000102024	PLS3	plastin 3 [Source:HGNC Symbol;Acc:HGNC:9091]	1.33161	0.842254	0.660843	12.8685	28.9151	-1.16797
ENSG00000163512	AZI2	5-azacytidine induced 2 [Source:HGNC Symbol;Acc:HGNC:24002]	1.32012	0.835064	0.660708	8.40302	19.1115	-1.18546
ENSG00000128346	C22orf23	chromosome 22 open reading frame 23 [Source:HGNC Symbol;Acc:HGNC:18589]	1.27103	0.804164	0.660438	2.90441	1.26402	1.20023
ENSG00000101180	HRH3	histamine receptor H3 [Source:HGNC Symbol;Acc:HGNC:5184]	0.794245	0.502577	0.660239	2.19122	8.20996	-1.90564
ENSG00000188986	NELFB	negative elongation factor complex member B [Source:HGNC Symbol;Acc:HGNC:24324]	1.06633	0.6748	0.660117	34.0413	23.1473	0.556445
ENSG00000124171	PARD6B	par-6 family cell polarity regulator beta [Source:HGNC Symbol;Acc:HGNC:16245]	1.12719	0.713336	0.660072	1.25234	1.78662	-0.512609
ENSG00000126226	PCID2	PCI domain containing 2 [Source:HGNC Symbol;Acc:HGNC:25653]	1.193	0.755002	0.660046	8.05922	13.897	-0.786061
ENSG00000012983	MAP4K5	mitogen-activated protein kinase kinase kinase kinase 5 [Source:HGNC Symbol;Acc:HGNC:6867]	1.40001	0.886062	0.659961	17.9192	16.1792	0.147367
ENSG00000115966	ATF2	activating transcription factor 2 [Source:HGNC Symbol;Acc:HGNC:784]	1.51388	0.958576	0.659291	28.3916	35.5038	-0.322506
ENSG00000166986	MARS	methionyl-tRNA synthetase [Source:HGNC Symbol;Acc:HGNC:6898]	1.35535	0.858209	0.65926	57.5848	24.4387	1.23652
ENSG00000163389	POGLUT1	protein O-glucosyltransferase 1 [Source:HGNC Symbol;Acc:HGNC:22954]	0.892642	0.565362	0.658906	5.24904	14.6444	-1.48022
ENSG00000242247	ARFGAP3	ADP-ribosylation factor GTPase activating protein 3 [Source:HGNC Symbol;Acc:HGNC:661]	1.457	0.9232	0.658281	18.0838	9.64235	0.90724
ENSG00000135749	PCNXL2	pecanex-like 2 (Drosophila) [Source:HGNC Symbol;Acc:HGNC:8736]	1.17194	0.742599	0.658245	7.4017	6.50241	0.186884
ENSG00000198646	NCOA6	nuclear receptor coactivator 6 [Source:HGNC Symbol;Acc:HGNC:15936]	1.48913	0.943683	0.658095	18.5178	16.5817	0.159318
ENSG00000065802	ASB1	ankyrin repeat and SOCS box containing 1 [Source:HGNC Symbol;Acc:HGNC:16011]	1.05342	0.667907	0.657365	6.82165	7.76738	-0.187309
ENSG00000158201	ABHD3	abhydrolase domain containing 3 [Source:HGNC Symbol;Acc:HGNC:18718]	1.94678	1.23457	0.657086	4.92269	3.82519	0.363913
ENSG00000144182	LIPT1	lipoyltransferase 1 [Source:HGNC Symbol;Acc:HGNC:29569]	0.870397	0.552099	0.656747	1.62377	2.90249	-0.837945
ENSG00000239305	RNF103	ring finger protein 103 [Source:HGNC Symbol;Acc:HGNC:12859]	1.68781	1.07061	0.656718	9.7455	17.0728	-0.808895
ENSG00000156642	NPTN	neuroplastin [Source:HGNC Symbol;Acc:HGNC:17867]	1.95121	1.23813	0.656205	48.9921	108.365	-1.14528
ENSG00000142530	FAM71E1	family with sequence similarity 71, member E1 [Source:HGNC Symbol;Acc:HGNC:25107]	1.14694	0.727891	0.655998	3.78662	3.55824	0.0897465
ENSG00000183137	CEP57L1	centrosomal protein 57kDa-like 1 [Source:HGNC Symbol;Acc:HGNC:21561]	0.591032	0.37522	0.6555	2.87144	1.70695	0.750355
ENSG00000135720	DYNC1LI2	dynein, cytoplasmic 1, light intermediate chain 2 [Source:HGNC Symbol;Acc:HGNC:2966]	1.33571	0.848021	0.655432	61.3345	48.0399	0.352464
ENSG00000117016	RIMS3	regulating synaptic membrane exocytosis 3 [Source:HGNC Symbol;Acc:HGNC:21292]	1.35942	0.863418	0.654865	19.7864	18.5891	0.0900492
ENSG00000165914	TTC7B	tetratricopeptide repeat domain 7B [Source:HGNC Symbol;Acc:HGNC:19858]	1.37731	0.874787	0.654852	2.24745	24.8469	-3.46671
ENSG00000198964	SGMS1	sphingomyelin synthase 1 [Source:HGNC Symbol;Acc:HGNC:29799]	1.51077	0.959648	0.654708	4.65341	4.86339	-0.0636744
ENSG00000136750	GAD2	glutamate decarboxylase 2 (pancreatic islets and brain, 65kDa) [Source:HGNC Symbol;Acc:HGNC:4093]	1.76817	1.12322	0.654613	8.54514	28.6882	-1.74728
ENSG00000170832	USP32	ubiquitin specific peptidase 32 [Source:HGNC Symbol;Acc:HGNC:19143]	1.65474	1.0515	0.654162	15.1834	19.5892	-0.367565
ENSG00000138399	FASTKD1	FAST kinase domains 1 [Source:HGNC Symbol;Acc:HGNC:26150]	0.728991	0.463283	0.654005	5.38255	6.37391	-0.243886
ENSG00000147010	SH3KBP1	SH3-domain kinase binding protein 1 [Source:HGNC Symbol;Acc:HGNC:13867]	1.50139	0.954645	0.653266	9.81923	11.3128	-0.204277
ENSG00000143434	SEMA6C	sema domain, transmembrane domain (TM), and cytoplasmic domain, (semaphorin) 6C [Source:HGNC Symbol;Acc:HGNC:10740]	1.01457	0.645122	0.653226	24.6653	22.5103	0.131894
ENSG00000076604	TRAF4	TNF receptor-associated factor 4 [Source:HGNC Symbol;Acc:HGNC:12034]	1.79904	1.14429	0.652776	20.376	23.9854	-0.235281
ENSG00000173264	GPR137	G protein-coupled receptor 137 [Source:HGNC Symbol;Acc:HGNC:24300]	1.2474	0.793559	0.652512	43.1926	40.2194	0.102894
ENSG00000084463	WBP11	WW domain binding protein 11 [Source:HGNC Symbol;Acc:HGNC:16461]	1.37591	0.875334	0.652483	29.5579	35.5482	-0.266234
ENSG00000075234	TTC38	tetratricopeptide repeat domain 38 [Source:HGNC Symbol;Acc:HGNC:26082]	1.00725	0.640821	0.652423	5.64243	0.887106	2.66914
ENSG00000131697	NPHP4	nephronophthisis 4 [Source:HGNC Symbol;Acc:HGNC:19104]	1.33417	0.849142	0.651863	7.12522	3.46495	1.0401
ENSG00000070423	RNF126	ring finger protein 126 [Source:HGNC Symbol;Acc:HGNC:21151]	1.5901	1.01211	0.651746	26.6076	57.7139	-1.11708
ENSG00000151692	RNF144A	ring finger protein 144A [Source:HGNC Symbol;Acc:HGNC:20457]	0.929546	0.591668	0.651738	16.7837	8.43756	0.992167
ENSG00000143442	POGZ	pogo transposable element with ZNF domain [Source:HGNC Symbol;Acc:HGNC:18801]	1.06265	0.676486	0.65154	31.4728	12.5148	1.33047
ENSG00000125170	DOK4	docking protein 4 [Source:HGNC Symbol;Acc:HGNC:19868]	1.33468	0.849682	0.651503	41.5676	66.0306	-0.667677
ENSG00000131188	PRR7	proline rich 7 (synaptic) [Source:HGNC Symbol;Acc:HGNC:28130]	1.45857	0.92873	0.651227	20.2376	51.1808	-1.33856
ENSG00000159753	RLTPR	RGD motif, leucine rich repeats, tropomodulin domain and proline-rich containing [Source:HGNC Symbol;Acc:HGNC:27089]	1.30107	0.828677	0.65082	5.52817	21.0474	-1.92877
ENSG00000179632	MAF1	MAF1 homolog, negative regulator of RNA polymerase III [Source:HGNC Symbol;Acc:HGNC:24966]	1.56714	0.998216	0.650705	40.0546	38.0782	0.0730021
ENSG00000160049	DFFA	DNA fragmentation factor, 45kDa, alpha polypeptide [Source:HGNC Symbol;Acc:HGNC:2772]	0.752788	0.479604	0.650401	7.39611	17.5064	-1.24304
ENSG00000182372	CLN8	ceroid-lipofuscinosis, neuronal 8 [Source:HGNC Symbol;Acc:HGNC:2079]	3.48639	2.22247	0.649566	4.41555	4.95521	-0.166355
ENSG00000151176	PLBD2	phospholipase B domain containing 2 [Source:HGNC Symbol;Acc:HGNC:27283]	1.10708	0.705946	0.649134	14.3306	12.9425	0.146983
ENSG00000157778	PSMG3	proteasome (prosome, macropain) assembly chaperone 3 [Source:HGNC Symbol;Acc:HGNC:22420]	0.921313	0.587762	0.64846	9.24494	4.58712	1.01107
ENSG00000174132	FAM174A	family with sequence similarity 174, member A [Source:HGNC Symbol;Acc:HGNC:24943]	1.14344	0.729471	0.648456	11.0089	11.0512	-0.00553798
ENSG00000196338	NLGN3	neuroligin 3 [Source:HGNC Symbol;Acc:HGNC:14289]	0.584796	0.373088	0.648415	31.1879	5.45706	2.51479
ENSG00000101413	RPRD1B	regulation of nuclear pre-mRNA domain containing 1B [Source:HGNC Symbol;Acc:HGNC:16209]	0.98229	0.626727	0.648311	12.4135	7.17439	0.79098
ENSG00000072422	RHOBTB1	Rho-related BTB domain containing 1 [Source:HGNC Symbol;Acc:HGNC:18738]	0.715333	0.456424	0.648238	5.53733	4.25025	0.381643
ENSG00000174106	LEMD3	LEM domain containing 3 [Source:HGNC Symbol;Acc:HGNC:28887]	1.45789	0.930287	0.648138	14.1985	11.8254	0.263849
ENSG00000048342	CC2D2A	coiled-coil and C2 domain containing 2A [Source:HGNC Symbol;Acc:HGNC:29253]	0.806229	0.514725	0.647387	7.15434	2.652	1.43174
ENSG00000163900	TMEM41A	transmembrane protein 41A [Source:HGNC Symbol;Acc:HGNC:30544]	1.11672	0.713249	0.646794	3.36493	13.9549	-2.05212
ENSG00000111731	C2CD5	C2 calcium-dependent domain containing 5 [Source:HGNC Symbol;Acc:HGNC:29062]	0.851823	0.544083	0.646728	26.2757	12.6458	1.05506
ENSG00000123595	RAB9A	RAB9A, member RAS oncogene family [Source:HGNC Symbol;Acc:HGNC:9792]	1.45545	0.929651	0.6467	7.27533	20.2665	-1.47801
ENSG00000087008	ACOX3	acyl-CoA oxidase 3, pristanoyl [Source:HGNC Symbol;Acc:HGNC:121]	1.24037	0.792278	0.646688	5.80073	5.40325	0.102407
ENSG00000130703	OSBPL2	oxysterol binding protein-like 2 [Source:HGNC Symbol;Acc:HGNC:15761]	1.19617	0.764051	0.646684	18.7135	28.6754	-0.615732
ENSG00000188706	ZDHHC9	zinc finger, DHHC-type containing 9 [Source:HGNC Symbol;Acc:HGNC:18475]	1.75436	1.12071	0.646532	20.1076	29.9631	-0.575446
ENSG00000160305	DIP2A	disco-interacting protein 2 homolog A [Source:HGNC Symbol;Acc:HGNC:17217]	1.03646	0.662166	0.646401	11.269	20.5624	-0.867654
ENSG00000177679	SRRM3	serine/arginine repetitive matrix 3 [Source:HGNC Symbol;Acc:HGNC:26729]	1.3569	0.866951	0.64629	18.2522	13.1112	0.477265
ENSG00000113460	BRIX1	BRX1, biogenesis of ribosomes [Source:HGNC Symbol;Acc:HGNC:24170]	1.02827	0.657095	0.646049	8.26376	8.68787	-0.0722044
ENSG00000164934	DCAF13	DDB1 and CUL4 associated factor 13 [Source:HGNC Symbol;Acc:HGNC:24535]	1.4012	0.895586	0.64576	6.14295	17.2445	-1.48913
ENSG00000120942	UBIAD1	UbiA prenyltransferase domain containing 1 [Source:HGNC Symbol;Acc:HGNC:30791]	0.750632	0.47981	0.645641	7.17445	5.23264	0.45533
ENSG00000104859	CLASRP	CLK4-associating serine/arginine rich protein [Source:HGNC Symbol;Acc:HGNC:17731]	1.37508	0.879012	0.645565	26.8995	29.3278	-0.124692
ENSG00000084112	SSH1	slingshot protein phosphatase 1 [Source:HGNC Symbol;Acc:HGNC:30579]	1.014	0.648213	0.645517	4.33407	4.99369	-0.204382
ENSG00000131370	SH3BP5	SH3-domain binding protein 5 (BTK-associated) [Source:HGNC Symbol;Acc:HGNC:10827]	1.30927	0.83709	0.645304	16.8413	30.3234	-0.84843
ENSG00000257704	INAFM1	InaF-motif containing 1 [Source:HGNC Symbol;Acc:HGNC:27406]	1.34679	0.861109	0.645258	12.2432	19.3645	-0.661439
ENSG00000151657	KIN	Kin17 DNA and RNA binding protein [Source:HGNC Symbol;Acc:HGNC:6327]	0.912337	0.58343	0.645007	3.48824	8.38748	-1.26574
ENSG00000071537	SEL1L	sel-1 suppressor of lin-12-like (C. elegans) [Source:HGNC Symbol;Acc:HGNC:10717]	0.895325	0.572613	0.64485	19.0314	31.116	-0.70928
ENSG00000002919	SNX11	sorting nexin 11 [Source:HGNC Symbol;Acc:HGNC:14975]	1.2647	0.809031	0.644526	9.49117	13.0656	-0.461117
ENSG00000177731	FLII	flightless I actin binding protein [Source:HGNC Symbol;Acc:HGNC:3750]	1.33407	0.853992	0.64354	22.7661	22.7567	0.000595804
ENSG00000183155	RABIF	RAB interacting factor [Source:HGNC Symbol;Acc:HGNC:9797]	0.947168	0.606456	0.643217	10.9739	15.9844	-0.542594
ENSG00000143368	SF3B4	splicing factor 3b, subunit 4, 49kDa [Source:HGNC Symbol;Acc:HGNC:10771]	1.23792	0.792694	0.64308	33.7166	20.8093	0.696231
ENSG00000188064	WNT7B	wingless-type MMTV integration site family, member 7B [Source:HGNC Symbol;Acc:HGNC:12787]	1.12007	0.717286	0.642965	28.6183	31.5107	-0.138905
ENSG00000189410	SH2D5	SH2 domain containing 5 [Source:HGNC Symbol;Acc:HGNC:28819]	1.56854	1.00451	0.642934	4.14703	8.07899	-0.962097
ENSG00000151012	SLC7A11	solute carrier family 7 (anionic amino acid transporter light chain, xc- system), member 11 [Source:HGNC Symbol;Acc:HGNC:11059]	2.30646	1.47715	0.642863	3.30781	2.45393	0.43078
ENSG00000168827	GFM1	G elongation factor, mitochondrial 1 [Source:HGNC Symbol;Acc:HGNC:13780]	1.04443	0.668903	0.642845	19.6017	9.29538	1.07639
ENSG00000115652	UXS1	UDP-glucuronate decarboxylase 1 [Source:HGNC Symbol;Acc:HGNC:17729]	1.17738	0.754389	0.642196	11.8893	7.95276	0.580142
ENSG00000117569	PTBP2	polypyrimidine tract binding protein 2 [Source:HGNC Symbol;Acc:HGNC:17662]	0.954964	0.611935	0.642067	9.96163	41.5822	-2.06151
ENSG00000147650	LRP12	low density lipoprotein receptor-related protein 12 [Source:HGNC Symbol;Acc:HGNC:31708]	1.17073	0.750275	0.641919	10.3864	17.4402	-0.747719
ENSG00000189227	C15orf61	chromosome 15 open reading frame 61 [Source:HGNC Symbol;Acc:HGNC:34453]	1.02065	0.654207	0.641669	3.49012	2.20076	0.665274
ENSG00000173145	NOC3L	NOC3-like DNA replication regulator [Source:HGNC Symbol;Acc:HGNC:24034]	0.859985	0.551342	0.641364	3.64597	4.83175	-0.406244
ENSG00000082641	NFE2L1	nuclear factor, erythroid 2-like 1 [Source:HGNC Symbol;Acc:HGNC:7781]	1.33289	0.854597	0.641245	50.3718	55.7755	-0.147014
ENSG00000154447	SH3RF1	SH3 domain containing ring finger 1 [Source:HGNC Symbol;Acc:HGNC:17650]	1.74066	1.11607	0.641209	8.03417	11.8689	-0.562961
ENSG00000180488	FAM73A	family with sequence similarity 73, member A [Source:HGNC Symbol;Acc:HGNC:24741]	0.783144	0.502156	0.641142	4.4209	20.8288	-2.23617
ENSG00000146433	TMEM181	transmembrane protein 181 [Source:HGNC Symbol;Acc:HGNC:20958]	1.14045	0.73127	0.641127	17.9057	15.9881	0.163417
ENSG00000166889	PATL1	protein associated with topoisomerase II homolog 1 (yeast) [Source:HGNC Symbol;Acc:HGNC:26721]	1.86654	1.19697	0.640983	12.1884	8.58974	0.504822
ENSG00000147316	MCPH1	microcephalin 1 [Source:HGNC Symbol;Acc:HGNC:6954]	1.02009	0.654169	0.640964	3.87918	3.43975	0.173446
ENSG00000026652	AGPAT4	1-acylglycerol-3-phosphate O-acyltransferase 4 [Source:HGNC Symbol;Acc:HGNC:20885]	2.12285	1.36195	0.640323	13.0798	32.2632	-1.30255
ENSG00000125652	ALKBH7	alkB homolog 7 [Source:HGNC Symbol;Acc:HGNC:21306]	1.21834	0.781794	0.640062	26.0133	14.0227	0.891484
ENSG00000157087	ATP2B2	ATPase, Ca++ transporting, plasma membrane 2 [Source:HGNC Symbol;Acc:HGNC:815]	0.776051	0.498079	0.639776	8.0333	37.3893	-2.21856
ENSG00000181873	IBA57	IBA57 homolog, iron-sulfur cluster assembly [Source:HGNC Symbol;Acc:HGNC:27302]	1.19772	0.768797	0.639619	1.3589	3.56241	-1.39042
ENSG00000163393	SLC22A15	solute carrier family 22, member 15 [Source:HGNC Symbol;Acc:HGNC:20301]	0.93574	0.600714	0.639429	4.06524	1.78435	1.18794
ENSG00000124209	RAB22A	RAB22A, member RAS oncogene family [Source:HGNC Symbol;Acc:HGNC:9764]	1.60436	1.03016	0.639127	8.09898	8.71844	-0.106329
ENSG00000172059	KLF11	Kruppel-like factor 11 [Source:HGNC Symbol;Acc:HGNC:11811]	1.0649	0.683809	0.63905	6.14172	3.65708	0.747951
ENSG00000104660	LEPROTL1	leptin receptor overlapping transcript-like 1 [Source:HGNC Symbol;Acc:HGNC:6555]	1.48305	0.952374	0.638968	29.4381	28.8233	0.0304509
ENSG00000172795	DCP2	decapping mRNA 2 [Source:HGNC Symbol;Acc:HGNC:24452]	1.0063	0.646557	0.638217	4.72215	8.00924	-0.762221
ENSG00000064547	LPAR2	lysophosphatidic acid receptor 2 [Source:HGNC Symbol;Acc:HGNC:3168]	0.874149	0.56181	0.637796	24.1649	1.11291	4.4405
ENSG00000113231	PDE8B	phosphodiesterase 8B [Source:HGNC Symbol;Acc:HGNC:8794]	1.27718	0.820852	0.637768	3.10289	3.84544	-0.309538
ENSG00000164434	FABP7	fatty acid binding protein 7, brain [Source:HGNC Symbol;Acc:HGNC:3562]	1.35276	0.869613	0.637463	87.1845	413.914	-2.24719
ENSG00000092847	AGO1	argonaute RISC catalytic component 1 [Source:HGNC Symbol;Acc:HGNC:3262]	1.1902	0.765647	0.636449	4.47232	25.7914	-2.5278
ENSG00000110697	PITPNM1	phosphatidylinositol transfer protein, membrane-associated 1 [Source:HGNC Symbol;Acc:HGNC:9003]	1.68278	1.08252	0.636446	35.8611	36.4324	-0.0228011
ENSG00000163577	EIF5A2	eukaryotic translation initiation factor 5A2 [Source:HGNC Symbol;Acc:HGNC:3301]	1.40928	0.906664	0.636318	1.11218	5.84072	-2.39275
ENSG00000178567	EPM2AIP1	EPM2A (laforin) interacting protein 1 [Source:HGNC Symbol;Acc:HGNC:19735]	0.933804	0.601129	0.635444	17.5739	28.2271	-0.683644
ENSG00000256537	SMIM10L1	small integral membrane protein 10 like 1 [Source:HGNC Symbol;Acc:HGNC:49847]	1.21663	0.783202	0.635435	8.51447	26.7513	-1.65162
ENSG00000130224	LRCH2	leucine-rich repeats and calponin homology (CH) domain containing 2 [Source:HGNC Symbol;Acc:HGNC:29292]	1.56775	1.0093	0.635344	16.9776	9.99891	0.763786
ENSG00000120709	FAM53C	family with sequence similarity 53, member C [Source:HGNC Symbol;Acc:HGNC:1336]	1.50937	0.9718	0.635211	18.9847	17.2591	0.137481
ENSG00000166676	TVP23A	trans-golgi network vesicle protein 23 homolog A (S. cerevisiae) [Source:HGNC Symbol;Acc:HGNC:20398]	1.03266	0.665068	0.634796	4.67908	9.49175	-1.02045
ENSG00000178381	ZFAND2A	zinc finger, AN1-type domain 2A [Source:HGNC Symbol;Acc:HGNC:28073]	1.23626	0.796308	0.634588	22.525	26.5774	-0.23867
ENSG00000140598	EFTUD1	elongation factor Tu GTP binding domain containing 1 [Source:HGNC Symbol;Acc:HGNC:25789]	1.16709	0.751962	0.634179	6.31211	5.04895	0.322138
ENSG00000172465	TCEAL1	transcription elongation factor A (SII)-like 1 [Source:HGNC Symbol;Acc:HGNC:11616]	1.06426	0.685728	0.634145	51.3646	6.97492	2.88052
ENSG00000177302	TOP3A	topoisomerase (DNA) III alpha [Source:HGNC Symbol;Acc:HGNC:11992]	0.932033	0.600585	0.634012	10.0352	1.52194	2.72109
ENSG00000136999	NOV	nephroblastoma overexpressed [Source:HGNC Symbol;Acc:HGNC:7885]	1.18078	0.761006	0.633763	2.80348	73.43	-4.71108
ENSG00000221968	FADS3	fatty acid desaturase 3 [Source:HGNC Symbol;Acc:HGNC:3576]	1.24219	0.800645	0.633657	8.08508	22.506	-1.47698
ENSG00000134153	EMC7	ER membrane protein complex subunit 7 [Source:HGNC Symbol;Acc:HGNC:24301]	1.43826	0.927227	0.633325	42.1018	14.9336	1.49532
ENSG00000184182	UBE2F	ubiquitin-conjugating enzyme E2F (putative) [Source:HGNC Symbol;Acc:HGNC:12480]	1.56115	1.00652	0.633229	12.1879	6.95185	0.809982
ENSG00000149679	CABLES2	Cdk5 and Abl enzyme substrate 2 [Source:HGNC Symbol;Acc:HGNC:16143]	1.42294	0.917679	0.632818	19.2767	16.6579	0.210652
ENSG00000196449	YRDC	yrdC N(6)-threonylcarbamoyltransferase domain containing [Source:HGNC Symbol;Acc:HGNC:28905]	1.54058	0.993586	0.632756	11.6508	15.5226	-0.413939
ENSG00000204065	TCEAL5	transcription elongation factor A (SII)-like 5 [Source:HGNC Symbol;Acc:HGNC:22282]	1.84687	1.19141	0.632413	10.2467	36.7501	-1.84259
ENSG00000140105	WARS	tryptophanyl-tRNA synthetase [Source:HGNC Symbol;Acc:HGNC:12729]	1.12592	0.726436	0.632202	29.7013	42.2364	-0.507963
ENSG00000103342	GSPT1	G1 to S phase transition 1 [Source:HGNC Symbol;Acc:HGNC:4621]	1.48783	0.960211	0.631783	22.2335	33.6366	-0.597298
ENSG00000168724	DNAJC21	DnaJ (Hsp40) homolog, subfamily C, member 21 [Source:HGNC Symbol;Acc:HGNC:27030]	1.52842	0.986525	0.631609	3.90962	4.42507	-0.178672
ENSG00000100207	TCF20	transcription factor 20 (AR1) [Source:HGNC Symbol;Acc:HGNC:11631]	1.21913	0.786952	0.631508	16.9961	17.0306	-0.00292467
ENSG00000137218	FRS3	fibroblast growth factor receptor substrate 3 [Source:HGNC Symbol;Acc:HGNC:16970]	0.814844	0.526048	0.631329	17.9521	9.09872	0.980414
ENSG00000119335	SET	SET nuclear proto-oncogene [Source:HGNC Symbol;Acc:HGNC:10760]	1.30565	0.842986	0.631191	145.595	63.5814	1.19529
ENSG00000162231	NXF1	nuclear RNA export factor 1 [Source:HGNC Symbol;Acc:HGNC:8071]	1.98368	1.28094	0.630976	23.7829	23.62	0.00991936
ENSG00000108443	RPS6KB1	ribosomal protein S6 kinase, 70kDa, polypeptide 1 [Source:HGNC Symbol;Acc:HGNC:10436]	1.31494	0.849149	0.630906	7.92876	12.7571	-0.686128
ENSG00000174799	CEP135	centrosomal protein 135kDa [Source:HGNC Symbol;Acc:HGNC:29086]	1.27381	0.822682	0.630746	1.99589	2.27324	-0.187719
ENSG00000157837	SPPL3	signal peptide peptidase like 3 [Source:HGNC Symbol;Acc:HGNC:30424]	1.3212	0.8533	0.630721	38.4745	37.668	0.0305642
ENSG00000129473	BCL2L2	BCL2-like 2 [Source:HGNC Symbol;Acc:HGNC:995]	1.40881	0.909958	0.6306	10.9486	15.2218	-0.475394
ENSG00000101391	CDK5RAP1	CDK5 regulatory subunit associated protein 1 [Source:HGNC Symbol;Acc:HGNC:15880]	1.01267	0.654613	0.629449	16.2543	3.76755	2.10912
ENSG00000140521	POLG	polymerase (DNA directed), gamma [Source:HGNC Symbol;Acc:HGNC:9179]	1.24661	0.805868	0.629396	9.92139	7.55611	0.392898
ENSG00000162694	EXTL2	exostosin-like glycosyltransferase 2 [Source:HGNC Symbol;Acc:HGNC:3516]	0.8803	0.569116	0.629272	15.0413	15.7106	-0.0628047
ENSG00000116473	RAP1A	RAP1A, member of RAS oncogene family [Source:HGNC Symbol;Acc:HGNC:9855]	1.47005	0.950504	0.629106	10.696	19.413	-0.85995
ENSG00000148606	POLR3A	polymerase (RNA) III (DNA directed) polypeptide A, 155kDa [Source:HGNC Symbol;Acc:HGNC:30074]	0.841876	0.54434	0.629099	13.0606	6.52538	1.00109
ENSG00000100664	EIF5	eukaryotic translation initiation factor 5 [Source:HGNC Symbol;Acc:HGNC:3299]	2.08375	1.34744	0.628958	54.0563	72.6957	-0.427407
ENSG00000118407	FILIP1	filamin A interacting protein 1 [Source:HGNC Symbol;Acc:HGNC:21015]	0.95059	0.614795	0.628718	1.75238	4.10973	-1.22973
ENSG00000142444	C19orf52	chromosome 19 open reading frame 52 [Source:HGNC Symbol;Acc:HGNC:25152]	1.14254	0.739142	0.628318	11.2282	22.1449	-0.979846
ENSG00000059145	UNKL	unkempt family zinc finger-like [Source:HGNC Symbol;Acc:HGNC:14184]	0.879571	0.569088	0.628149	5.5747	3.73911	0.576198
ENSG00000130725	UBE2M	ubiquitin-conjugating enzyme E2M [Source:HGNC Symbol;Acc:HGNC:12491]	1.49462	0.967038	0.628133	56.3939	109.371	-0.95562
ENSG00000096717	SIRT1	sirtuin 1 [Source:HGNC Symbol;Acc:HGNC:14929]	1.60435	1.03853	0.627453	10.7231	3.61661	1.56801
ENSG00000010818	HIVEP2	human immunodeficiency virus type I enhancer binding protein 2 [Source:HGNC Symbol;Acc:HGNC:4921]	2.55461	1.65365	0.627445	8.9206	28.6328	-1.68246
ENSG00000130764	LRRC47	leucine rich repeat containing 47 [Source:HGNC Symbol;Acc:HGNC:29207]	1.01938	0.659955	0.627258	29.458	16.7889	0.811155
ENSG00000151090	THRB	thyroid hormone receptor, beta [Source:HGNC Symbol;Acc:HGNC:11799]	1.0727	0.694854	0.62647	0.60814	8.00267	-3.71801
ENSG00000210127	MT-TA	mitochondrially encoded tRNA alanine [Source:HGNC Symbol;Acc:HGNC:7475]	1.5067	0.97601	0.626426	2.36065	18.3485	-2.95841
ENSG00000113327	GABRG2	gamma-aminobutyric acid (GABA) A receptor, gamma 2 [Source:HGNC Symbol;Acc:HGNC:4087]	1.34818	0.873359	0.626367	21.27	31.82	-0.581114
ENSG00000175376	EIF1AD	eukaryotic translation initiation factor 1A domain containing [Source:HGNC Symbol;Acc:HGNC:28147]	1.18284	0.766439	0.626016	8.93177	11.4513	-0.358489
ENSG00000100387	RBX1	ring-box 1, E3 ubiquitin protein ligase [Source:HGNC Symbol;Acc:HGNC:9928]	1.02948	0.667466	0.625147	31.5475	63.8302	-1.01671
ENSG00000169918	OTUD7A	OTU deubiquitinase 7A [Source:HGNC Symbol;Acc:HGNC:20718]	1.37358	0.890642	0.625029	2.40234	11.6974	-2.28367
ENSG00000133997	MED6	mediator complex subunit 6 [Source:HGNC Symbol;Acc:HGNC:19970]	1.08699	0.704815	0.625019	10.4523	10.3803	0.00996685
ENSG00000165072	MAMDC2	MAM domain containing 2 [Source:HGNC Symbol;Acc:HGNC:23673]	1.24674	0.808436	0.62495	1.0432	3.64572	-1.80519
ENSG00000103187	COTL1	coactosin-like F-actin binding protein 1 [Source:HGNC Symbol;Acc:HGNC:18304]	1.94516	1.26138	0.624894	18.8169	89.8935	-2.25619
ENSG00000111684	LPCAT3	lysophosphatidylcholine acyltransferase 3 [Source:HGNC Symbol;Acc:HGNC:30244]	0.96379	0.624994	0.624877	2.45349	11.7323	-2.25758
ENSG00000110237	ARHGEF17	Rho guanine nucleotide exchange factor (GEF) 17 [Source:HGNC Symbol;Acc:HGNC:21726]	1.11191	0.721357	0.624255	13.0741	8.94462	0.547617
ENSG00000221869	CEBPD	CCAAT/enhancer binding protein (C/EBP), delta [Source:HGNC Symbol;Acc:HGNC:1835]	2.5724	1.66891	0.624209	1.13325	3.69078	-1.70346
ENSG00000262246	CORO7	coronin 7 [Source:HGNC Symbol;Acc:HGNC:26161]	1.35226	0.877525	0.623856	4.19857	19.5267	-2.21748
ENSG00000198399	ITSN2	intersectin 2 [Source:HGNC Symbol;Acc:HGNC:6184]	1.26235	0.819385	0.6235	3.99434	5.78627	-0.534674
ENSG00000112290	WASF1	WAS protein family, member 1 [Source:HGNC Symbol;Acc:HGNC:12732]	1.56552	1.0164	0.623179	57.2912	122.267	-1.09365
ENSG00000126698	DNAJC8	DnaJ (Hsp40) homolog, subfamily C, member 8 [Source:HGNC Symbol;Acc:HGNC:15470]	1.19488	0.775824	0.623067	74.8245	37.188	1.00867
ENSG00000196821	C6orf106	chromosome 6 open reading frame 106 [Source:HGNC Symbol;Acc:HGNC:21215]	3.11513	2.02269	0.623015	12.2973	40.8625	-1.73244
ENSG00000168040	FADD	Fas (TNFRSF6)-associated via death domain [Source:HGNC Symbol;Acc:HGNC:3573]	0.740833	0.481196	0.622523	4.68166	0.720005	2.70094
ENSG00000251322	SHANK3	SH3 and multiple ankyrin repeat domains 3 [Source:HGNC Symbol;Acc:HGNC:14294]	1.76934	1.14938	0.622358	10.3188	29.2206	-1.50171
ENSG00000172667	ZMAT3	zinc finger, matrin-type 3 [Source:HGNC Symbol;Acc:HGNC:29983]	1.33523	0.867608	0.62197	7.94252	12.1376	-0.611808
ENSG00000110171	TRIM3	tripartite motif containing 3 [Source:HGNC Symbol;Acc:HGNC:10064]	1.48374	0.964198	0.621832	16.9941	58.7819	-1.79034
ENSG00000178234	GALNT11	polypeptide N-acetylgalactosaminyltransferase 11 [Source:HGNC Symbol;Acc:HGNC:19875]	1.95824	1.27277	0.621582	20.0584	10.15	0.982727
ENSG00000147416	ATP6V1B2	ATPase, H+ transporting, lysosomal 56/58kDa, V1 subunit B2 [Source:HGNC Symbol;Acc:HGNC:854]	1.52252	0.99021	0.620657	31.8306	183.606	-2.52813
ENSG00000118246	FASTKD2	FAST kinase domains 2 [Source:HGNC Symbol;Acc:HGNC:29160]	0.876782	0.570417	0.620201	7.99	2.80317	1.51114
ENSG00000139132	FGD4	FYVE, RhoGEF and PH domain containing 4 [Source:HGNC Symbol;Acc:HGNC:19125]	0.906291	0.589791	0.61977	8.13583	9.8908	-0.281798
ENSG00000162878	PKDCC	protein kinase domain containing, cytoplasmic [Source:HGNC Symbol;Acc:HGNC:25123]	0.962323	0.62642	0.619392	7.51915	9.13623	-0.281029
ENSG00000095319	NUP188	nucleoporin 188kDa [Source:HGNC Symbol;Acc:HGNC:17859]	0.930001	0.605537	0.619017	11.2771	5.86551	0.943065
ENSG00000168785	TSPAN5	tetraspanin 5 [Source:HGNC Symbol;Acc:HGNC:17753]	1.53887	1.00211	0.618834	23.5904	31.0395	-0.395907
ENSG00000156928	MALSU1	mitochondrial assembly of ribosomal large subunit 1 [Source:HGNC Symbol;Acc:HGNC:21721]	1.45255	0.946085	0.618546	5.14596	4.84526	0.086867
ENSG00000184384	MAML2	mastermind-like 2 (Drosophila) [Source:HGNC Symbol;Acc:HGNC:16259]	1.66845	1.08696	0.618218	3.50298	1.16564	1.58746
ENSG00000275700	AATF	apoptosis antagonizing transcription factor [Source:HGNC Symbol;Acc:HGNC:19235]	1.33651	0.87079	0.618076	14.4964	7.17065	1.01552
ENSG00000100075	SLC25A1	solute carrier family 25 (mitochondrial carrier; citrate transporter), member 1 [Source:HGNC Symbol;Acc:HGNC:10979]	1.31043	0.85392	0.617865	49.8905	82.6151	-0.727642
ENSG00000008710	PKD1	polycystic kidney disease 1 (autosomal dominant) [Source:HGNC Symbol;Acc:HGNC:9008]	1.39199	0.907079	0.617852	19.2951	7.82756	1.3016
ENSG00000175324	LSM1	LSM1 homolog, mRNA degradation associated [Source:HGNC Symbol;Acc:HGNC:20472]	1.18677	0.773484	0.617599	13.4327	11.1192	0.272697
ENSG00000119328	FAM206A	family with sequence similarity 206, member A [Source:HGNC Symbol;Acc:HGNC:1364]	1.26036	0.821468	0.617563	8.5917	6.2787	0.452478
ENSG00000167785	ZNF558	zinc finger protein 558 [Source:HGNC Symbol;Acc:HGNC:26422]	0.783963	0.511106	0.617163	6.78905	2.87976	1.23726
ENSG00000101096	NFATC2	nuclear factor of activated T-cells, cytoplasmic, calcineurin-dependent 2 [Source:HGNC Symbol;Acc:HGNC:7776]	9.55076	6.22698	0.617083	0.155949	1.26803	-3.02345
ENSG00000105642	KCNN1	potassium channel, calcium activated intermediate/small conductance subfamily N alpha, member 1 [Source:HGNC Symbol;Acc:HGNC:6290]	1.63812	1.0682	0.616854	8.34619	7.24051	0.205026
ENSG00000097021	ACOT7	acyl-CoA thioesterase 7 [Source:HGNC Symbol;Acc:HGNC:24157]	1.51496	0.98799	0.616707	60.6182	240.204	-1.98644
ENSG00000177045	SIX5	SIX homeobox 5 [Source:HGNC Symbol;Acc:HGNC:10891]	0.636875	0.415398	0.616517	1.07428	0.868922	0.306078
ENSG00000145220	LYAR	Ly1 antibody reactive [Source:HGNC Symbol;Acc:HGNC:26021]	1.12191	0.732104	0.615832	4.69121	9.05339	-0.948497
ENSG00000164211	STARD4	StAR-related lipid transfer (START) domain containing 4 [Source:HGNC Symbol;Acc:HGNC:18058]	3.14876	2.0549	0.615717	9.11551	26.7958	-1.55561
ENSG00000139971	C14orf37	chromosome 14 open reading frame 37 [Source:HGNC Symbol;Acc:HGNC:19846]	1.05023	0.685432	0.615614	6.8821	11.7838	-0.775879
ENSG00000171302	CANT1	calcium activated nucleotidase 1 [Source:HGNC Symbol;Acc:HGNC:19721]	0.962133	0.627963	0.615556	16.74	15.9496	0.0697771
ENSG00000164951	PDP1	pyruvate dehyrogenase phosphatase catalytic subunit 1 [Source:HGNC Symbol;Acc:HGNC:9279]	1.66677	1.08793	0.615467	15.5734	14.3346	0.119582
ENSG00000184602	SNN	stannin [Source:HGNC Symbol;Acc:HGNC:11149]	1.13464	0.740754	0.615172	95.3199	87.2116	0.128257
ENSG00000068724	TTC7A	tetratricopeptide repeat domain 7A [Source:HGNC Symbol;Acc:HGNC:19750]	0.843777	0.55087	0.615151	5.1793	1.22714	2.07745
ENSG00000115760	BIRC6	baculoviral IAP repeat containing 6 [Source:HGNC Symbol;Acc:HGNC:13516]	1.19567	0.780649	0.615078	10.199	10.8226	-0.0856283
ENSG00000100644	HIF1A	hypoxia inducible factor 1, alpha subunit (basic helix-loop-helix transcription factor) [Source:HGNC Symbol;Acc:HGNC:4910]	1.40063	0.914911	0.614374	38.7204	26.1046	0.568791
ENSG00000140995	DEF8	differentially expressed in FDCP 8 homolog (mouse) [Source:HGNC Symbol;Acc:HGNC:25969]	1.11522	0.728567	0.614193	24.5297	17.8684	0.457117
ENSG00000170759	KIF5B	kinesin family member 5B [Source:HGNC Symbol;Acc:HGNC:6324]	1.75927	1.14969	0.613723	38.915	33.5323	0.214774
ENSG00000169372	CRADD	CASP2 and RIPK1 domain containing adaptor with death domain [Source:HGNC Symbol;Acc:HGNC:2340]	0.950429	0.621199	0.613525	5.47581	2.50042	1.1309
ENSG00000110619	CARS	cysteinyl-tRNA synthetase [Source:HGNC Symbol;Acc:HGNC:1493]	1.74097	1.13878	0.6124	16.58	25.277	-0.608383
ENSG00000184967	NOC4L	nucleolar complex associated 4 homolog [Source:HGNC Symbol;Acc:HGNC:28461]	1.41411	0.925385	0.611769	14.6937	18.6737	-0.345816
ENSG00000139842	CUL4A	cullin 4A [Source:HGNC Symbol;Acc:HGNC:2554]	1.13371	0.74198	0.611599	12.0003	24.9085	-1.05357
ENSG00000242114	MTFP1	mitochondrial fission process 1 [Source:HGNC Symbol;Acc:HGNC:26945]	0.845576	0.553488	0.611383	0.828364	16.8355	-4.3451
ENSG00000155561	NUP205	nucleoporin 205kDa [Source:HGNC Symbol;Acc:HGNC:18658]	1.03425	0.677121	0.611095	9.11493	8.09154	0.171816
ENSG00000062716	VMP1	vacuole membrane protein 1 [Source:HGNC Symbol;Acc:HGNC:29559]	1.4596	0.955626	0.611057	14.6773	33.5479	-1.19263
ENSG00000046651	OFD1	oral-facial-digital syndrome 1 [Source:HGNC Symbol;Acc:HGNC:2567]	1.38721	0.908336	0.610888	5.63292	2.0089	1.48748
ENSG00000172845	SP3	Sp3 transcription factor [Source:HGNC Symbol;Acc:HGNC:11208]	1.18135	0.773732	0.610533	14.3368	13.3293	0.105122
ENSG00000131016	AKAP12	A kinase (PRKA) anchor protein 12 [Source:HGNC Symbol;Acc:HGNC:370]	1.94446	1.27378	0.610257	13.4434	6.51321	1.04546
ENSG00000102898	NUTF2	nuclear transport factor 2 [Source:HGNC Symbol;Acc:HGNC:13722]	1.32849	0.870363	0.610095	31.1612	19.6863	0.662555
ENSG00000205978	NYNRIN	NYN domain and retroviral integrase containing [Source:HGNC Symbol;Acc:HGNC:20165]	0.695826	0.455892	0.610035	10.3348	1.66212	2.63641
ENSG00000198478	SH3BGRL2	SH3 domain binding glutamate-rich protein like 2 [Source:HGNC Symbol;Acc:HGNC:15567]	1.58276	1.0371	0.609897	9.83474	4.3803	1.16686
ENSG00000160753	RUSC1	RUN and SH3 domain containing 1 [Source:HGNC Symbol;Acc:HGNC:17153]	1.35144	0.88578	0.609478	26.9738	34.5447	-0.356904
ENSG00000165209	STRBP	spermatid perinuclear RNA binding protein [Source:HGNC Symbol;Acc:HGNC:16462]	1.50055	0.983579	0.609381	14.0146	11.1451	0.330524
ENSG00000275111	ZNF2	zinc finger protein 2 [Source:HGNC Symbol;Acc:HGNC:12991]	0.515946	0.338316	0.608849	2.9145	1.97274	0.563048
ENSG00000108424	KPNB1	karyopherin (importin) beta 1 [Source:HGNC Symbol;Acc:HGNC:6400]	1.61224	1.05722	0.608785	37.0317	42.7364	-0.206704
ENSG00000138433	CIR1	corepressor interacting with RBPJ, 1 [Source:HGNC Symbol;Acc:HGNC:24217]	1.16663	0.765429	0.608011	18.8297	4.3404	2.11711
ENSG00000115233	PSMD14	proteasome (prosome, macropain) 26S subunit, non-ATPase, 14 [Source:HGNC Symbol;Acc:HGNC:16889]	1.39082	0.912535	0.607985	15.5332	51.7769	-1.73695
ENSG00000124275	MTRR	5-methyltetrahydrofolate-homocysteine methyltransferase reductase [Source:HGNC Symbol;Acc:HGNC:7473]	1.15054	0.755066	0.607634	8.56586	2.66982	1.68186
ENSG00000142186	SCYL1	SCY1-like, kinase-like 1 [Source:HGNC Symbol;Acc:HGNC:14372]	1.44405	0.947783	0.60749	35.0949	29.0682	0.271818
ENSG00000040487	PQLC2	PQ loop repeat containing 2 [Source:HGNC Symbol;Acc:HGNC:26001]	0.863109	0.566736	0.606865	13.0439	3.84635	1.76182
ENSG00000172890	NADSYN1	NAD synthetase 1 [Source:HGNC Symbol;Acc:HGNC:29832]	1.16795	0.766915	0.606835	9.19201	1.18588	2.95442
ENSG00000162975	KCNF1	potassium channel, voltage gated modifier subfamily F, member 1 [Source:HGNC Symbol;Acc:HGNC:6246]	3.54251	2.3262	0.606795	5.12552	15.8519	-1.62888
ENSG00000152969	JAKMIP1	janus kinase and microtubule interacting protein 1 [Source:HGNC Symbol;Acc:HGNC:26460]	1.31459	0.86341	0.606495	8.78169	29.2304	-1.7349
ENSG00000159921	GNE	glucosamine (UDP-N-acetyl)-2-epimerase/N-acetylmannosamine kinase [Source:HGNC Symbol;Acc:HGNC:23657]	1.03379	0.678995	0.606474	11.2541	8.06952	0.47989
ENSG00000187555	USP7	ubiquitin specific peptidase 7 (herpes virus-associated) [Source:HGNC Symbol;Acc:HGNC:12630]	1.56746	1.02961	0.606332	32.1142	38.4151	-0.258463
ENSG00000117020	AKT3	v-akt murine thymoma viral oncogene homolog 3 [Source:HGNC Symbol;Acc:HGNC:393]	1.52768	1.00369	0.606019	21.0714	72.5803	-1.78429
ENSG00000171806	METTL18	methyltransferase like 18 [Source:HGNC Symbol;Acc:HGNC:28793]	0.461763	0.303414	0.605865	4.43671	1.6839	1.39769
ENSG00000116161	CACYBP	calcyclin binding protein [Source:HGNC Symbol;Acc:HGNC:30423]	1.62764	1.06964	0.605647	30.8067	70.9777	-1.20412
ENSG00000187535	IFT140	intraflagellar transport 140 [Source:HGNC Symbol;Acc:HGNC:29077]	0.838278	0.550959	0.605482	15.0463	7.60412	0.984558
ENSG00000175063	UBE2C	ubiquitin-conjugating enzyme E2C [Source:HGNC Symbol;Acc:HGNC:15937]	1.27954	0.841113	0.605252	5.51549	1.68614	1.70976
ENSG00000165806	CASP7	caspase 7, apoptosis-related cysteine peptidase [Source:HGNC Symbol;Acc:HGNC:1508]	1.06865	0.702551	0.605121	1.0853	3.14432	-1.53466
ENSG00000197283	SYNGAP1	synaptic Ras GTPase activating protein 1 [Source:HGNC Symbol;Acc:HGNC:11497]	1.45667	0.957828	0.604836	15.6096	71.0738	-2.18688
ENSG00000090539	CHRD	chordin [Source:HGNC Symbol;Acc:HGNC:1949]	0.94013	0.618299	0.604555	3.98466	3.09785	0.36319
ENSG00000126705	AHDC1	AT hook, DNA binding motif, containing 1 [Source:HGNC Symbol;Acc:HGNC:25230]	1.32143	0.869205	0.604334	20.7497	11.1525	0.895727
ENSG00000112079	STK38	serine/threonine kinase 38 [Source:HGNC Symbol;Acc:HGNC:17847]	1.2248	0.805668	0.604285	8.63226	14.8559	-0.783227
ENSG00000099995	SF3A1	splicing factor 3a, subunit 1, 120kDa [Source:HGNC Symbol;Acc:HGNC:10765]	1.30322	0.85735	0.604125	25.3635	22.0387	0.202715
ENSG00000067082	KLF6	Kruppel-like factor 6 [Source:HGNC Symbol;Acc:HGNC:2235]	2.4972	1.64286	0.6041	14.5157	35.0789	-1.27299
ENSG00000113328	CCNG1	cyclin G1 [Source:HGNC Symbol;Acc:HGNC:1592]	1.66499	1.09554	0.603868	27.6841	19.9174	0.475025
ENSG00000102531	FNDC3A	fibronectin type III domain containing 3A [Source:HGNC Symbol;Acc:HGNC:20296]	2.04819	1.34769	0.603862	22.587	9.01174	1.32562
ENSG00000121966	CXCR4	chemokine (C-X-C motif) receptor 4 [Source:HGNC Symbol;Acc:HGNC:2561]	2.1461	1.4123	0.603666	27.1616	5.18679	2.38866
ENSG00000082153	BZW1	basic leucine zipper and W2 domains 1 [Source:HGNC Symbol;Acc:HGNC:18380]	1.57105	1.03393	0.603592	27.5905	117.538	-2.09088
ENSG00000005100	DHX33	DEAH (Asp-Glu-Ala-His) box polypeptide 33 [Source:HGNC Symbol;Acc:HGNC:16718]	0.98341	0.647337	0.603276	7.01686	6.87296	0.0298929
ENSG00000156052	GNAQ	guanine nucleotide binding protein (G protein), q polypeptide [Source:HGNC Symbol;Acc:HGNC:4390]	1.40104	0.922324	0.603157	37.2924	68.0645	-0.868022
ENSG00000153207	AHCTF1	AT hook containing transcription factor 1 [Source:HGNC Symbol;Acc:HGNC:24618]	1.39206	0.91661	0.602847	5.97396	5.85731	0.028449
ENSG00000069956	MAPK6	mitogen-activated protein kinase 6 [Source:HGNC Symbol;Acc:HGNC:6879]	2.18209	1.43683	0.602825	25.7379	35.4301	-0.461081
ENSG00000069869	NEDD4	neural precursor cell expressed, developmentally down-regulated 4, E3 ubiquitin protein ligase [Source:HGNC Symbol;Acc:HGNC:7727]	1.41343	0.930948	0.602424	1.50196	141.786	-6.56073
ENSG00000104218	CSPP1	centrosome and spindle pole associated protein 1 [Source:HGNC Symbol;Acc:HGNC:26193]	1.15939	0.763734	0.602227	5.83624	6.53535	-0.163226
ENSG00000005436	GCFC2	GC-rich sequence DNA-binding factor 2 [Source:HGNC Symbol;Acc:HGNC:1317]	0.88052	0.580638	0.600715	4.63648	1.29184	1.84361
ENSG00000209082	MT-TL1	mitochondrially encoded tRNA leucine 1 (UUA/G) [Source:HGNC Symbol;Acc:HGNC:7490]	1.87202	1.23488	0.600223	43.6624	22.6886	0.944423
ENSG00000172554	SNTG2	syntrophin, gamma 2 [Source:HGNC Symbol;Acc:HGNC:13741]	0.940484	0.620441	0.60011	1.23565	2.14818	-0.79784
ENSG00000130706	ADRM1	adhesion regulating molecule 1 [Source:HGNC Symbol;Acc:HGNC:15759]	1.47836	0.975302	0.60008	43.9344	18.409	1.25494
ENSG00000050820	BCAR1	breast cancer anti-estrogen resistance 1 [Source:HGNC Symbol;Acc:HGNC:971]	1.11838	0.737834	0.600038	19.6183	23.8577	-0.282254
ENSG00000152484	USP12	ubiquitin specific peptidase 12 [Source:HGNC Symbol;Acc:HGNC:20485]	1.68319	1.11053	0.599953	13.2742	25.33	-0.932223
ENSG00000177485	ZBTB33	zinc finger and BTB domain containing 33 [Source:HGNC Symbol;Acc:HGNC:16682]	1.41213	0.931741	0.599874	10.3111	7.24563	0.509021
ENSG00000188859	FAM78B	family with sequence similarity 78, member B [Source:HGNC Symbol;Acc:HGNC:13495]	0.990784	0.653744	0.599843	2.64432	13.6298	-2.3658
ENSG00000159164	SV2A	synaptic vesicle glycoprotein 2A [Source:HGNC Symbol;Acc:HGNC:20566]	1.39295	0.919155	0.599759	109.498	115.115	-0.0721694
ENSG00000156959	LHFPL4	lipoma HMGIC fusion partner-like 4 [Source:HGNC Symbol;Acc:HGNC:29568]	0.996949	0.657914	0.59962	23.4894	41.0337	-0.804798
ENSG00000163013	FBXO41	F-box protein 41 [Source:HGNC Symbol;Acc:HGNC:29409]	1.1085	0.731535	0.599604	24.512	32.7478	-0.417908
ENSG00000167528	ZNF641	zinc finger protein 641 [Source:HGNC Symbol;Acc:HGNC:31834]	0.777116	0.512871	0.599536	9.13159	3.30452	1.46643
ENSG00000166833	NAV2	neuron navigator 2 [Source:HGNC Symbol;Acc:HGNC:15997]	1.40439	0.927095	0.599155	6.52259	12.7609	-0.968215
ENSG00000119280	C1orf198	chromosome 1 open reading frame 198 [Source:HGNC Symbol;Acc:HGNC:25900]	1.63075	1.07688	0.598677	14.0307	26.5474	-0.919986
ENSG00000077235	GTF3C1	general transcription factor IIIC, polypeptide 1, alpha 220kDa [Source:HGNC Symbol;Acc:HGNC:4664]	1.05794	0.698683	0.598547	23.3057	18.4235	0.339133
ENSG00000165782	TMEM55B	transmembrane protein 55B [Source:HGNC Symbol;Acc:HGNC:19299]	1.52927	1.00997	0.598534	20.995	27.8688	-0.408607
ENSG00000107140	TESK1	testis-specific kinase 1 [Source:HGNC Symbol;Acc:HGNC:11731]	1.39216	0.920246	0.597239	39.59	16.0917	1.29882
ENSG00000132405	TBC1D14	TBC1 domain family, member 14 [Source:HGNC Symbol;Acc:HGNC:29246]	0.92442	0.611064	0.597225	16.9295	33.5238	-0.985648
ENSG00000174695	TMEM167A	transmembrane protein 167A [Source:HGNC Symbol;Acc:HGNC:28330]	1.05306	0.696118	0.597179	47.0314	9.81343	2.26079
ENSG00000100034	PPM1F	protein phosphatase, Mg2+/Mn2+ dependent, 1F [Source:HGNC Symbol;Acc:HGNC:19388]	0.745886	0.493104	0.597064	8.54401	8.64692	-0.0172727
ENSG00000162650	ATXN7L2	ataxin 7-like 2 [Source:HGNC Symbol;Acc:HGNC:28713]	0.870913	0.575835	0.596874	9.40503	8.6581	0.119383
ENSG00000155506	LARP1	La ribonucleoprotein domain family, member 1 [Source:HGNC Symbol;Acc:HGNC:29531]	1.17859	0.779502	0.596436	63.7432	29.0807	1.13221
ENSG00000186297	GABRA5	gamma-aminobutyric acid (GABA) A receptor, alpha 5 [Source:HGNC Symbol;Acc:HGNC:4079]	1.31879	0.872292	0.596338	4.69545	79.0866	-4.0741
ENSG00000007384	RHBDF1	rhomboid 5 homolog 1 (Drosophila) [Source:HGNC Symbol;Acc:HGNC:20561]	1.23664	0.818262	0.595796	4.27409	3.85501	0.148884
ENSG00000155980	KIF5A	kinesin family member 5A [Source:HGNC Symbol;Acc:HGNC:6323]	1.42954	0.946119	0.595459	80.3178	169.122	-1.07427
ENSG00000204438	GPANK1	G patch domain and ankyrin repeats 1 [Source:HGNC Symbol;Acc:HGNC:13920]	0.834196	0.5521	0.595456	5.42407	2.31508	1.22831
ENSG00000128567	PODXL	podocalyxin-like [Source:HGNC Symbol;Acc:HGNC:9171]	0.895871	0.592964	0.595348	9.61244	3.82961	1.3277
ENSG00000075275	CELSR1	cadherin, EGF LAG seven-pass G-type receptor 1 [Source:HGNC Symbol;Acc:HGNC:1850]	0.990793	0.655828	0.595265	5.49607	1.56926	1.80832
ENSG00000181350	LRRC75A	leucine rich repeat containing 75A [Source:HGNC Symbol;Acc:HGNC:32403]	2.31738	1.53394	0.595254	5.11152	4.36775	0.22686
ENSG00000084676	NCOA1	nuclear receptor coactivator 1 [Source:HGNC Symbol;Acc:HGNC:7668]	1.42049	0.940634	0.594689	13.7509	18.3225	-0.414093
ENSG00000265808	SEC22B	SEC22 vesicle trafficking protein homolog B (S. cerevisiae) (gene/pseudogene) [Source:HGNC Symbol;Acc:HGNC:10700]	1.66485	1.10274	0.594291	4.5888	21.4321	-2.22358
ENSG00000136404	TM6SF1	transmembrane 6 superfamily member 1 [Source:HGNC Symbol;Acc:HGNC:11860]	1.40421	0.93021	0.59413	0.76615	1.81048	-1.24067
ENSG00000180185	FAHD1	fumarylacetoacetate hydrolase domain containing 1 [Source:HGNC Symbol;Acc:HGNC:14169]	0.775696	0.51388	0.59406	15.6338	5.94151	1.39576
ENSG00000108788	MLX	MLX, MAX dimerization protein [Source:HGNC Symbol;Acc:HGNC:11645]	1.00766	0.66774	0.593655	11.2651	19.1592	-0.76617
ENSG00000108389	MTMR4	myotubularin related protein 4 [Source:HGNC Symbol;Acc:HGNC:7452]	0.871157	0.577368	0.593441	41.747	24.2669	0.782684
ENSG00000132522	GPS2	G protein pathway suppressor 2 [Source:HGNC Symbol;Acc:HGNC:4550]	1.3412	0.88928	0.592818	7.0195	13.4833	-0.941738
ENSG00000135686	KLHL36	kelch-like family member 36 [Source:HGNC Symbol;Acc:HGNC:17844]	1.05754	0.701298	0.592608	10.8828	3.08141	1.82039
ENSG00000273611	ZNHIT3	zinc finger, HIT-type containing 3 [Source:HGNC Symbol;Acc:HGNC:12309]	0.961014	0.63734	0.592496	9.83003	16.267	-0.726676
ENSG00000165046	LETM2	leucine zipper-EF-hand containing transmembrane protein 2 [Source:HGNC Symbol;Acc:HGNC:14648]	1.48755	0.986567	0.592444	4.42729	2.4934	0.828312
ENSG00000253352	TUG1	taurine up-regulated 1 (non-protein coding) [Source:HGNC Symbol;Acc:HGNC:26066]	0.954726	0.633241	0.592331	49.0076	23.1108	1.08444
ENSG00000213281	NRAS	neuroblastoma RAS viral (v-ras) oncogene homolog [Source:HGNC Symbol;Acc:HGNC:7989]	1.26994	0.842363	0.592249	20.8364	22.0337	-0.0806067
ENSG00000154719	MRPL39	mitochondrial ribosomal protein L39 [Source:HGNC Symbol;Acc:HGNC:14027]	1.31413	0.871857	0.591944	14.1498	9.23619	0.615415
ENSG00000100147	CCDC134	coiled-coil domain containing 134 [Source:HGNC Symbol;Acc:HGNC:26185]	1.61056	1.06862	0.59181	3.02155	3.91176	-0.372528
ENSG00000140403	DNAJA4	DnaJ (Hsp40) homolog, subfamily A, member 4 [Source:HGNC Symbol;Acc:HGNC:14885]	1.77799	1.17984	0.591658	0.667677	4.02417	-2.59147
ENSG00000125505	MBOAT7	membrane bound O-acyltransferase domain containing 7 [Source:HGNC Symbol;Acc:HGNC:15505]	1.63439	1.0847	0.591452	41.2338	41.0401	0.00679289
ENSG00000115419	GLS	glutaminase [Source:HGNC Symbol;Acc:HGNC:4331]	2.05021	1.36072	0.591397	24.0796	65.7941	-1.45015
ENSG00000069275	NUCKS1	nuclear casein kinase and cyclin-dependent kinase substrate 1 [Source:HGNC Symbol;Acc:HGNC:29923]	1.02324	0.679215	0.591203	69.7989	29.8438	1.22577
ENSG00000163516	ANKZF1	ankyrin repeat and zinc finger domain containing 1 [Source:HGNC Symbol;Acc:HGNC:25527]	1.06733	0.708482	0.591199	20.1636	6.69858	1.58983
ENSG00000177917	ARL6IP6	ADP-ribosylation factor-like 6 interacting protein 6 [Source:HGNC Symbol;Acc:HGNC:24048]	0.869252	0.577008	0.591184	8.03756	5.32337	0.594418
ENSG00000109736	MFSD10	major facilitator superfamily domain containing 10 [Source:HGNC Symbol;Acc:HGNC:16894]	1.16046	0.770418	0.590985	43.5875	10.1299	2.1053
ENSG00000137845	ADAM10	ADAM metallopeptidase domain 10 [Source:HGNC Symbol;Acc:HGNC:188]	1.04372	0.692921	0.590978	7.10686	22.5342	-1.66483
ENSG00000197601	FAR1	fatty acyl CoA reductase 1 [Source:HGNC Symbol;Acc:HGNC:26222]	1.69683	1.12657	0.590908	14.9768	20.5732	-0.458041
ENSG00000105088	OLFM2	olfactomedin 2 [Source:HGNC Symbol;Acc:HGNC:17189]	1.50338	0.998594	0.590241	88.0669	154.713	-0.812927
ENSG00000065154	OAT	ornithine aminotransferase [Source:HGNC Symbol;Acc:HGNC:8091]	1.70208	1.13069	0.590091	52.6401	48.8404	0.108087
ENSG00000166167	BTRC	beta-transducin repeat containing E3 ubiquitin protein ligase [Source:HGNC Symbol;Acc:HGNC:1144]	1.09492	0.727498	0.589814	15.9319	18.9198	-0.247973
ENSG00000047315	POLR2B	polymerase (RNA) II (DNA directed) polypeptide B, 140kDa [Source:HGNC Symbol;Acc:HGNC:9188]	1.27121	0.844633	0.589799	48.4047	23.154	1.06388
ENSG00000163624	CDS1	CDP-diacylglycerol synthase (phosphatidate cytidylyltransferase) 1 [Source:HGNC Symbol;Acc:HGNC:1800]	2.02088	1.34281	0.589735	6.22072	14.547	-1.22557
ENSG00000079999	KEAP1	kelch-like ECH-associated protein 1 [Source:HGNC Symbol;Acc:HGNC:23177]	0.825084	0.548302	0.589571	21.0743	17.0564	0.30517
ENSG00000121871	SLITRK3	SLIT and NTRK-like family, member 3 [Source:HGNC Symbol;Acc:HGNC:23501]	0.621457	0.413195	0.58883	16.4468	16.8562	-0.0354776
ENSG00000196628	TCF4	transcription factor 4 [Source:HGNC Symbol;Acc:HGNC:11634]	1.39367	0.926733	0.588669	10.6467	73.6512	-2.7903
ENSG00000172985	SH3RF3	SH3 domain containing ring finger 3 [Source:HGNC Symbol;Acc:HGNC:24699]	1.6813	1.11814	0.588478	3.17151	23.4113	-2.88396
ENSG00000163870	TPRA1	transmembrane protein, adipocyte asscociated 1 [Source:HGNC Symbol;Acc:HGNC:30413]	1.21506	0.808151	0.588327	18.7028	5.84696	1.6775
ENSG00000139514	SLC7A1	solute carrier family 7 (cationic amino acid transporter, y+ system), member 1 [Source:HGNC Symbol;Acc:HGNC:11057]	2.75586	1.83338	0.587997	9.46704	15.4517	-0.70678
ENSG00000198169	ZNF251	zinc finger protein 251 [Source:HGNC Symbol;Acc:HGNC:13045]	1.00533	0.66884	0.587931	19.8597	19.6587	0.0146798
ENSG00000152404	CWF19L2	CWF19-like 2, cell cycle control (S. pombe) [Source:HGNC Symbol;Acc:HGNC:26508]	1.15701	0.770273	0.586957	3.44959	3.31265	0.0584407
ENSG00000136002	ARHGEF4	Rho guanine nucleotide exchange factor (GEF) 4 [Source:HGNC Symbol;Acc:HGNC:684]	0.986915	0.657164	0.586673	26.6126	15.1715	0.810742
ENSG00000187961	KLHL17	kelch-like family member 17 [Source:HGNC Symbol;Acc:HGNC:24023]	1.23103	0.819746	0.586623	14.8916	14.8585	0.00321109
ENSG00000142002	DPP9	dipeptidyl-peptidase 9 [Source:HGNC Symbol;Acc:HGNC:18648]	1.19025	0.792615	0.586574	6.80684	17.6076	-1.37114
ENSG00000185453	C19orf68	chromosome 19 open reading frame 68 [Source:HGNC Symbol;Acc:HGNC:34495]	0.838077	0.558145	0.586443	5.63743	3.04947	0.88648
ENSG00000164902	PHAX	phosphorylated adaptor for RNA export [Source:HGNC Symbol;Acc:HGNC:10241]	0.889832	0.592667	0.586311	17.7101	26.5906	-0.586339
ENSG00000011566	MAP4K3	mitogen-activated protein kinase kinase kinase kinase 3 [Source:HGNC Symbol;Acc:HGNC:6865]	1.36818	0.911276	0.586296	15.0636	23.1291	-0.618637
ENSG00000113161	HMGCR	3-hydroxy-3-methylglutaryl-CoA reductase [Source:HGNC Symbol;Acc:HGNC:5006]	2.64291	1.76117	0.585594	86.7139	118.438	-0.4498
ENSG00000086061	DNAJA1	DnaJ (Hsp40) homolog, subfamily A, member 1 [Source:HGNC Symbol;Acc:HGNC:5229]	1.75781	1.17139	0.585564	206.617	65.2389	1.66315
ENSG00000074855	ANO8	anoctamin 8 [Source:HGNC Symbol;Acc:HGNC:29329]	0.996975	0.664401	0.585503	48.7824	30.1635	0.693558
ENSG00000156983	BRPF1	bromodomain and PHD finger containing, 1 [Source:HGNC Symbol;Acc:HGNC:14255]	1.40841	0.938726	0.585288	6.61915	7.25695	-0.132716
ENSG00000130827	PLXNA3	plexin A3 [Source:HGNC Symbol;Acc:HGNC:9101]	1.19358	0.795558	0.585253	15.0316	28.0363	-0.899294
ENSG00000175216	CKAP5	cytoskeleton associated protein 5 [Source:HGNC Symbol;Acc:HGNC:28959]	1.03954	0.693073	0.584873	45.1825	36.58	0.304709
ENSG00000204304	PBX2	pre-B-cell leukemia homeobox 2 [Source:HGNC Symbol;Acc:HGNC:8633]	0.869259	0.579607	0.584712	28.9094	11.7364	1.30055
ENSG00000110917	MLEC	malectin [Source:HGNC Symbol;Acc:HGNC:28973]	1.24287	0.82891	0.584392	21.5886	23.5506	-0.125495
ENSG00000197872	FAM49A	family with sequence similarity 49, member A [Source:HGNC Symbol;Acc:HGNC:25373]	1.25136	0.834657	0.584247	18.9784	141.419	-2.89754
ENSG00000104375	STK3	serine/threonine kinase 3 [Source:HGNC Symbol;Acc:HGNC:11406]	1.15866	0.772827	0.584245	0.889522	3.99816	-2.16823
ENSG00000119878	CRIPT	cysteine-rich PDZ-binding protein [Source:HGNC Symbol;Acc:HGNC:14312]	1.4464	0.964755	0.584227	8.31758	42.2084	-2.34329
ENSG00000116983	HPCAL4	hippocalcin like 4 [Source:HGNC Symbol;Acc:HGNC:18212]	1.30016	0.867258	0.58416	40.2659	37.9001	0.0873593
ENSG00000103494	RPGRIP1L	RPGRIP1-like [Source:HGNC Symbol;Acc:HGNC:29168]	0.741951	0.494951	0.584039	4.78069	4.85955	-0.0236031
ENSG00000123983	ACSL3	acyl-CoA synthetase long-chain family member 3 [Source:HGNC Symbol;Acc:HGNC:3570]	1.64726	1.09889	0.58402	32.7011	47.7566	-0.546361
ENSG00000185518	SV2B	synaptic vesicle glycoprotein 2B [Source:HGNC Symbol;Acc:HGNC:16874]	1.03974	0.693648	0.58395	0.847107	29.9414	-5.14345
ENSG00000104472	CHRAC1	chromatin accessibility complex 1 [Source:HGNC Symbol;Acc:HGNC:13544]	0.827179	0.551889	0.583821	4.29545	4.35766	-0.0207444
ENSG00000156453	PCDH1	protocadherin 1 [Source:HGNC Symbol;Acc:HGNC:8655]	0.755	0.503772	0.583704	20.9454	38.0883	-0.862718
ENSG00000198546	ZNF511	zinc finger protein 511 [Source:HGNC Symbol;Acc:HGNC:28445]	1.3598	0.90741	0.583565	2.62008	15.7304	-2.58588
ENSG00000116455	WDR77	WD repeat domain 77 [Source:HGNC Symbol;Acc:HGNC:29652]	1.02039	0.680932	0.583538	12.1245	10.7325	0.175935
ENSG00000102781	KATNAL1	katanin p60 subunit A-like 1 [Source:HGNC Symbol;Acc:HGNC:28361]	1.19106	0.79519	0.582876	8.22158	10.4028	-0.339479
ENSG00000186862	PDZD7	PDZ domain containing 7 [Source:HGNC Symbol;Acc:HGNC:26257]	1.57817	1.05392	0.582488	5.53671	1.32952	2.05813
ENSG00000143870	PDIA6	protein disulfide isomerase family A, member 6 [Source:HGNC Symbol;Acc:HGNC:30168]	1.46444	0.978388	0.581874	34.8061	81.1979	-1.2221
ENSG00000159792	PSKH1	protein serine kinase H1 [Source:HGNC Symbol;Acc:HGNC:9529]	0.75993	0.507713	0.581854	8.09341	2.59544	1.64077
ENSG00000182504	CEP97	centrosomal protein 97kDa [Source:HGNC Symbol;Acc:HGNC:26244]	1.07884	0.72097	0.581465	5.46296	1.35144	2.01518
ENSG00000119801	YPEL5	yippee-like 5 [Source:HGNC Symbol;Acc:HGNC:18329]	2.34988	1.57053	0.581338	35.5744	15.8066	1.17031
ENSG00000133216	EPHB2	EPH receptor B2 [Source:HGNC Symbol;Acc:HGNC:3393]	1.05706	0.706731	0.580827	20.3829	7.36942	1.46774
ENSG00000183475	ASB7	ankyrin repeat and SOCS box containing 7 [Source:HGNC Symbol;Acc:HGNC:17182]	1.32175	0.8838	0.580654	3.65003	4.37996	-0.263011
ENSG00000075292	ZNF638	zinc finger protein 638 [Source:HGNC Symbol;Acc:HGNC:17894]	0.847001	0.56636	0.580645	27.4485	13.1725	1.05919
ENSG00000141456	PELP1	proline, glutamate and leucine rich protein 1 [Source:HGNC Symbol;Acc:HGNC:30134]	1.15706	0.773691	0.580637	20.0679	15.4353	0.378655
ENSG00000160613	PCSK7	proprotein convertase subtilisin/kexin type 7 [Source:HGNC Symbol;Acc:HGNC:8748]	0.990504	0.662326	0.580621	3.94755	7.10216	-0.847302
ENSG00000143919	CAMKMT	calmodulin-lysine N-methyltransferase [Source:HGNC Symbol;Acc:HGNC:26276]	1.38036	0.923131	0.58044	3.57619	6.92091	-0.95254
ENSG00000169718	DUS1L	dihydrouridine synthase 1-like [Source:HGNC Symbol;Acc:HGNC:30086]	0.87677	0.586867	0.579165	15.3606	10.0592	0.610718
ENSG00000143774	GUK1	guanylate kinase 1 [Source:HGNC Symbol;Acc:HGNC:4693]	1.68037	1.12483	0.579074	68.5932	54.9459	0.320053
ENSG00000168675	LDLRAD4	low density lipoprotein receptor class A domain containing 4 [Source:HGNC Symbol;Acc:HGNC:1224]	1.24361	0.832571	0.578895	4.26329	13.312	-1.64269
ENSG00000145016	KIAA0226	KIAA0226 [Source:HGNC Symbol;Acc:HGNC:28991]	1.5041	1.00704	0.578773	16.579	23.3263	-0.492602
ENSG00000136051	KIAA1033	KIAA1033 [Source:HGNC Symbol;Acc:HGNC:29174]	0.844341	0.565446	0.578438	6.66649	7.22116	-0.115304
ENSG00000164061	BSN	bassoon presynaptic cytomatrix protein [Source:HGNC Symbol;Acc:HGNC:1117]	1.24271	0.832398	0.578141	9.07944	18.2037	-1.00356
ENSG00000104497	SNX16	sorting nexin 16 [Source:HGNC Symbol;Acc:HGNC:14980]	1.37716	0.922533	0.578025	4.64231	23.7124	-2.35273
ENSG00000163636	PSMD6	proteasome (prosome, macropain) 26S subunit, non-ATPase, 6 [Source:HGNC Symbol;Acc:HGNC:9564]	1.26776	0.849348	0.577853	14.2862	67.0862	-2.23139
ENSG00000112996	MRPS30	mitochondrial ribosomal protein S30 [Source:HGNC Symbol;Acc:HGNC:8769]	1.37222	0.919505	0.577578	8.52262	11.0343	-0.372627
ENSG00000074696	HACD3	3-hydroxyacyl-CoA dehydratase 3 [Source:HGNC Symbol;Acc:HGNC:24175]	1.18315	0.792896	0.577432	75.8301	67.2636	0.172945
ENSG00000012963	UBR7	ubiquitin protein ligase E3 component n-recognin 7 (putative) [Source:HGNC Symbol;Acc:HGNC:20344]	1.0851	0.727411	0.576992	14.1656	14.9012	-0.0730324
ENSG00000151640	DPYSL4	dihydropyrimidinase-like 4 [Source:HGNC Symbol;Acc:HGNC:3016]	1.30351	0.873925	0.576821	71.4499	35.0544	1.02733
ENSG00000005483	KMT2E	lysine (K)-specific methyltransferase 2E [Source:HGNC Symbol;Acc:HGNC:18541]	1.05155	0.705035	0.576753	28.9268	27.3285	0.0820008
ENSG00000188283	ZNF383	zinc finger protein 383 [Source:HGNC Symbol;Acc:HGNC:18609]	0.940973	0.630908	0.576723	1.95673	3.11418	-0.670412
ENSG00000198431	TXNRD1	thioredoxin reductase 1 [Source:HGNC Symbol;Acc:HGNC:12437]	1.91993	1.28773	0.576222	28.0682	33.4303	-0.252218
ENSG00000006468	ETV1	ets variant 1 [Source:HGNC Symbol;Acc:HGNC:3490]	1.20441	0.807864	0.576147	7.17473	5.82412	0.300884
ENSG00000144524	COPS7B	COP9 signalosome subunit 7B [Source:HGNC Symbol;Acc:HGNC:16760]	0.979163	0.656961	0.575742	18.6144	6.84116	1.44411
ENSG00000188026	RILPL1	Rab interacting lysosomal protein-like 1 [Source:HGNC Symbol;Acc:HGNC:26814]	1.30784	0.877636	0.575489	3.42857	6.01034	-0.809839
ENSG00000166068	SPRED1	sprouty-related, EVH1 domain containing 1 [Source:HGNC Symbol;Acc:HGNC:20249]	2.00951	1.34859	0.575388	8.92698	15.567	-0.802245
ENSG00000120256	LRP11	low density lipoprotein receptor-related protein 11 [Source:HGNC Symbol;Acc:HGNC:16936]	1.26983	0.852724	0.57449	15.0842	50.9181	-1.75514
ENSG00000156858	PRR14	proline rich 14 [Source:HGNC Symbol;Acc:HGNC:28458]	1.22043	0.819555	0.574481	24.1085	12.7665	0.917181
ENSG00000107021	TBC1D13	TBC1 domain family, member 13 [Source:HGNC Symbol;Acc:HGNC:25571]	1.16455	0.782216	0.574137	16.2005	22.0833	-0.446923
ENSG00000139117	CPNE8	copine VIII [Source:HGNC Symbol;Acc:HGNC:23498]	1.06589	0.715955	0.574118	4.12037	20.598	-2.32166
ENSG00000106608	URGCP	upregulator of cell proliferation [Source:HGNC Symbol;Acc:HGNC:30890]	0.72541	0.487354	0.573826	9.3579	7.94286	0.236527
ENSG00000168000	BSCL2	Berardinelli-Seip congenital lipodystrophy 2 (seipin) [Source:HGNC Symbol;Acc:HGNC:15832]	1.57023	1.05498	0.573764	6.88721	19.0279	-1.46612
ENSG00000143952	VPS54	vacuolar protein sorting 54 homolog (S. cerevisiae) [Source:HGNC Symbol;Acc:HGNC:18652]	1.1815	0.79388	0.573629	7.36037	9.76575	-0.407953
ENSG00000120662	MTRF1	mitochondrial translational release factor 1 [Source:HGNC Symbol;Acc:HGNC:7469]	0.70885	0.47646	0.573125	5.79852	2.70279	1.10124
ENSG00000101236	RNF24	ring finger protein 24 [Source:HGNC Symbol;Acc:HGNC:13779]	1.54415	1.038	0.573	9.99868	9.60737	0.0575966
ENSG00000108175	ZMIZ1	zinc finger, MIZ-type containing 1 [Source:HGNC Symbol;Acc:HGNC:16493]	1.2793	0.860083	0.572807	84.2835	29.0225	1.53808
ENSG00000113805	CNTN3	contactin 3 (plasmacytoma associated) [Source:HGNC Symbol;Acc:HGNC:2173]	0.787648	0.529582	0.572698	2.36044	6.40654	-1.44049
ENSG00000212864	RNF208	ring finger protein 208 [Source:HGNC Symbol;Acc:HGNC:25420]	1.37721	0.926089	0.572528	27.3796	92.3108	-1.7534
ENSG00000123091	RNF11	ring finger protein 11 [Source:HGNC Symbol;Acc:HGNC:10056]	1.98172	1.33279	0.572301	69.5637	66.766	0.0592199
ENSG00000142409	ZNF787	zinc finger protein 787 [Source:HGNC Symbol;Acc:HGNC:26998]	1.33719	0.899409	0.572153	15.1882	7.53289	1.01168
ENSG00000168397	ATG4B	autophagy related 4B, cysteine peptidase [Source:HGNC Symbol;Acc:HGNC:20790]	1.00621	0.676952	0.571803	34.9265	17.8956	0.964717
ENSG00000110218	PANX1	pannexin 1 [Source:HGNC Symbol;Acc:HGNC:8599]	1.16696	0.785434	0.57119	25.8843	30.0873	-0.217075
ENSG00000117505	DR1	down-regulator of transcription 1, TBP-binding (negative cofactor 2) [Source:HGNC Symbol;Acc:HGNC:3017]	1.29364	0.870758	0.571092	9.5969	19.6651	-1.03499
ENSG00000171385	KCND3	potassium channel, voltage gated Shal related subfamily D, member 3 [Source:HGNC Symbol;Acc:HGNC:6239]	1.2412	0.835543	0.570953	7.4308	8.03763	-0.113254
ENSG00000119537	KDSR	3-ketodihydrosphingosine reductase [Source:HGNC Symbol;Acc:HGNC:4021]	0.987879	0.665062	0.570845	7.24237	3.87967	0.900529
ENSG00000073169	SELO	selenoprotein O [Source:EntrezGene;Acc:83642]	1.08346	0.729467	0.570733	13.122	6.601	0.991226
ENSG00000213337	ANKRD39	ankyrin repeat domain 39 [Source:HGNC Symbol;Acc:HGNC:28640]	1.04009	0.700272	0.570715	2.34498	3.10425	-0.404672
ENSG00000119559	C19orf25	chromosome 19 open reading frame 25 [Source:HGNC Symbol;Acc:HGNC:26711]	1.07976	0.727337	0.570017	13.764	11.4662	0.263513
ENSG00000130208	APOC1	apolipoprotein C-I [Source:HGNC Symbol;Acc:HGNC:607]	1.76913	1.19183	0.56986	1.82749	1.33584	0.45212
ENSG00000107833	NPM3	nucleophosmin/nucleoplasmin 3 [Source:HGNC Symbol;Acc:HGNC:7931]	1.12353	0.756962	0.569751	12.6373	14.177	-0.165868
ENSG00000165801	ARHGEF40	Rho guanine nucleotide exchange factor (GEF) 40 [Source:HGNC Symbol;Acc:HGNC:25516]	1.1848	0.798371	0.569509	14.0736	5.35297	1.39458
ENSG00000083635	NUFIP1	nuclear fragile X mental retardation protein interacting protein 1 [Source:HGNC Symbol;Acc:HGNC:8057]	1.06953	0.720773	0.569364	4.14304	4.27425	-0.0449799
[truncated: 9,303 more rows]
