# Supplementary material for: Evidence for evolutionary divergence of activity-dependent gene expression in developing neurons
Source: eLife journal article supplement (doi:10.7554/elife.20337), 2016-10-01
Supplement: supp [file elife-20337-supp-v1.zip › elife_poa_e20337_Figure_2_source_data_3.xlsx]

## Sheet: Fig. S2b,c,d
human_gene	human_gene_name	human_description	Basal Hum-ESC-CORT neurons	Basal Mus-DIV10 CORT neurons	Basal Mus-DIV4 CORT neurons	Basal Mus-ESC-CORT neurons
ENSG00000198804	MT-CO1	mitochondrially encoded cytochrome c oxidase I [Source:HGNC Symbol;Acc:HGNC:7419]	4885.86	5613.29	3924.35	5382.85
ENSG00000198886	MT-ND4	mitochondrially encoded NADH dehydrogenase 4 [Source:HGNC Symbol;Acc:HGNC:7459]	4129.11	1132.32	178.3	1327.73
ENSG00000198695	MT-ND6	mitochondrially encoded NADH dehydrogenase 6 [Source:HGNC Symbol;Acc:HGNC:7462]	3128.49	1584.2	85.4342	1676.9
ENSG00000198727	MT-CYB	mitochondrially encoded cytochrome b [Source:HGNC Symbol;Acc:HGNC:7427]	2805.38	3550.73	1254.51	4490
ENSG00000198763	MT-ND2	mitochondrially encoded NADH dehydrogenase 2 [Source:HGNC Symbol;Acc:HGNC:7456]	2429.03	2099.88	269.487	2213.17
ENSG00000198786	MT-ND5	mitochondrially encoded NADH dehydrogenase 5 [Source:HGNC Symbol;Acc:HGNC:7461]	2300.43	1599.91	121.487	1717.2
ENSG00000034510	TMSB10	thymosin beta 10 [Source:HGNC Symbol;Acc:HGNC:11879]	2204.63	515.291	616.691	625.431
ENSG00000167552	TUBA1A	tubulin, alpha 1a [Source:HGNC Symbol;Acc:HGNC:20766]	2196.05	2309	3997.44	1778.75
ENSG00000210082	MT-RNR2	mitochondrially encoded 16S RNA [Source:HGNC Symbol;Acc:HGNC:7471]	1998.82	588.43	12441	402.647
ENSG00000198888	MT-ND1	mitochondrially encoded NADH dehydrogenase 1 [Source:HGNC Symbol;Acc:HGNC:7455]	1782.11	3055.89	1306.91	3465.22
ENSG00000184009	ACTG1	actin gamma 1 [Source:HGNC Symbol;Acc:HGNC:144]	1399.12	369.713	560.881	349.186
ENSG00000075624	ACTB	actin, beta [Source:HGNC Symbol;Acc:HGNC:132]	1037.92	596.373	2703.24	467.291
ENSG00000104435	STMN2	stathmin 2 [Source:HGNC Symbol;Acc:HGNC:10577]	909.012	567.266	250.436	339.169
ENSG00000242265	PEG10	paternally expressed 10 [Source:HGNC Symbol;Acc:HGNC:14005]	794.039	6.91871	4.69091	158.479
ENSG00000154277	UCHL1	ubiquitin carboxyl-terminal esterase L1 (ubiquitin thiolesterase) [Source:HGNC Symbol;Acc:HGNC:12513]	686.25	757.787	457.894	484.825
ENSG00000175130	MARCKSL1	MARCKS-like 1 [Source:HGNC Symbol;Acc:HGNC:7142]	671.955	542.004	517.731	383.686
ENSG00000176788	BASP1	brain abundant, membrane attached signal protein 1 [Source:HGNC Symbol;Acc:HGNC:957]	667.25	917.96	418.081	313.852
ENSG00000109971	HSPA8	heat shock 70kDa protein 8 [Source:HGNC Symbol;Acc:HGNC:5241]	649.197	177.791	359.947	226.336
ENSG00000053438	NNAT	neuronatin [Source:HGNC Symbol;Acc:HGNC:7860]	634.786	579.801	560.357	235.31
ENSG00000111640	GAPDH	glyceraldehyde-3-phosphate dehydrogenase [Source:HGNC Symbol;Acc:HGNC:4141]	558.4	273.639	97.0463	332.094
ENSG00000105894	PTN	pleiotrophin [Source:HGNC Symbol;Acc:HGNC:9630]	548.999	152.105	197.437	242.253
ENSG00000167658	EEF2	eukaryotic translation elongation factor 2 [Source:HGNC Symbol;Acc:HGNC:3214]	524.336	461.572	723.583	667.128
ENSG00000156508	EEF1A1	eukaryotic translation elongation factor 1 alpha 1 [Source:HGNC Symbol;Acc:HGNC:3189]	506.069	1279.84	3263.86	2374.97
ENSG00000087460	GNAS	GNAS complex locus [Source:HGNC Symbol;Acc:HGNC:4392]	502.665	38.0093	2.88539	37.4343
ENSG00000211459	MT-RNR1	mitochondrially encoded 12S RNA [Source:HGNC Symbol;Acc:HGNC:7470]	500.985	656.189	2165.58	465.755
ENSG00000159335	PTMS	parathymosin [Source:HGNC Symbol;Acc:HGNC:9629]	499.955	829.112	385.169	373.612
ENSG00000137285	TUBB2B	tubulin, beta 2B class IIb [Source:HGNC Symbol;Acc:HGNC:30829]	497.201	984.004	1486.29	761.903
ENSG00000074800	ENO1	enolase 1, (alpha) [Source:HGNC Symbol;Acc:HGNC:3350]	492.351	302.147	117.956	329.309
ENSG00000065978	YBX1	Y box binding protein 1 [Source:HGNC Symbol;Acc:HGNC:8014]	489.632	399.803	451.303	259.61
ENSG00000172020	GAP43	growth associated protein 43 [Source:HGNC Symbol;Acc:HGNC:4140]	468.982	875.192	521.632	452.397
ENSG00000170091	HMP19	Neuron-specific protein family member 2 [Source:UniProtKB/Swiss-Prot;Acc:Q9Y328]	465.542	519.747	681.231	186.248
ENSG00000172757	CFL1	cofilin 1 (non-muscle) [Source:HGNC Symbol;Acc:HGNC:1874]	459.98	1050.9	936.125	621.585
ENSG00000210196	MT-TP	mitochondrially encoded tRNA proline [Source:HGNC Symbol;Acc:HGNC:7494]	452.041	474.509	298.272	352.097
ENSG00000142192	APP	amyloid beta (A4) precursor protein [Source:HGNC Symbol;Acc:HGNC:620]	451.486	519.046	188.324	394.543
ENSG00000096384	HSP90AB1	heat shock protein 90kDa alpha (cytosolic), class B member 1 [Source:HGNC Symbol;Acc:HGNC:5258]	437.402	733.971	658.605	832.376
ENSG00000113657	DPYSL3	dihydropyrimidinase-like 3 [Source:HGNC Symbol;Acc:HGNC:3015]	436.671	541.853	611.037	331.03
ENSG00000210140	MT-TC	mitochondrially encoded tRNA cysteine [Source:HGNC Symbol;Acc:HGNC:7477]	433.904	45.9976	441.07	17.6239
ENSG00000142534	RPS11	ribosomal protein S11 [Source:HGNC Symbol;Acc:HGNC:10384]	425.895	207.823	421.199	349.893
ENSG00000080824	HSP90AA1	heat shock protein 90kDa alpha (cytosolic), class A member 1 [Source:HGNC Symbol;Acc:HGNC:5253]	420.581	225.758	307.264	208.575
ENSG00000112306	RPS12	ribosomal protein S12 [Source:HGNC Symbol;Acc:HGNC:10385]	410.263	331.688	754.243	584.171
ENSG00000072832	CRMP1	collapsin response mediator protein 1 [Source:HGNC Symbol;Acc:HGNC:2365]	406.336	640.424	443.309	287.211
ENSG00000117632	STMN1	stathmin 1 [Source:HGNC Symbol;Acc:HGNC:6510]	405.623	644.942	965.362	312.903
ENSG00000196230	TUBB	tubulin, beta class I [Source:HGNC Symbol;Acc:HGNC:20778]	404.494	742.485	1141.36	669.224
ENSG00000150625	GPM6A	glycoprotein M6A [Source:HGNC Symbol;Acc:HGNC:4460]	401.798	559.789	427.429	201.116
ENSG00000161016	RPL8	ribosomal protein L8 [Source:HGNC Symbol;Acc:HGNC:10368]	396.289	314.982	450.398	464.609
ENSG00000142937	RPS8	ribosomal protein S8 [Source:HGNC Symbol;Acc:HGNC:10441]	381.626	153.658	355.559	263.589
ENSG00000134308	YWHAQ	tyrosine 3-monooxygenase/tryptophan 5-monooxygenase activation protein, theta [Source:HGNC Symbol;Acc:HGNC:12854]	371.777	116.903	121.91	95.9468
ENSG00000197746	PSAP	prosaposin [Source:HGNC Symbol;Acc:HGNC:9498]	370.174	463.869	309.259	459.017
ENSG00000187514	PTMA	prothymosin, alpha [Source:HGNC Symbol;Acc:HGNC:9623]	369.868	171.875	499.017	204.869
ENSG00000198034	RPS4X	ribosomal protein S4, X-linked [Source:HGNC Symbol;Acc:HGNC:10424]	369.737	237.068	571.804	572.966
ENSG00000108953	YWHAE	tyrosine 3-monooxygenase/tryptophan 5-monooxygenase activation protein, epsilon [Source:HGNC Symbol;Acc:HGNC:12851]	369.222	623.184	268.231	475.302
ENSG00000123562	MORF4L2	mortality factor 4 like 2 [Source:HGNC Symbol;Acc:HGNC:16849]	367.17	143.941	199.127	172.032
ENSG00000160014	CALM3	calmodulin 3 (phosphorylase kinase, delta) [Source:HGNC Symbol;Acc:HGNC:1449]	359.877	780.494	490.977	423.776
ENSG00000122406	RPL5	ribosomal protein L5 [Source:HGNC Symbol;Acc:HGNC:10360]	343.522	62.6937	198.144	121.611
ENSG00000102109	PCSK1N	proprotein convertase subtilisin/kexin type 1 inhibitor [Source:HGNC Symbol;Acc:HGNC:17301]	336.708	146.468	10.7332	28.7563
ENSG00000133872	SARAF	store-operated calcium entry-associated regulatory factor [Source:HGNC Symbol;Acc:HGNC:28789]	335.059	94.7397	73.3306	106.812
ENSG00000148303	RPL7A	ribosomal protein L7a [Source:HGNC Symbol;Acc:HGNC:10364]	333.207	201.286	472.898	297.568
ENSG00000133169	BEX1	brain expressed, X-linked 1 [Source:HGNC Symbol;Acc:HGNC:1036]	332.608	67.0624	50.2842	58.6826
ENSG00000166681	NGFRAP1	nerve growth factor receptor (TNFRSF16) associated protein 1 [Source:HGNC Symbol;Acc:HGNC:13388]	331.704	201.44	119.046	209.767
ENSG00000110321	EIF4G2	eukaryotic translation initiation factor 4 gamma, 2 [Source:HGNC Symbol;Acc:HGNC:3297]	331.287	294.422	239.542	329.945
ENSG00000148798	INA	internexin neuronal intermediate filament protein, alpha [Source:HGNC Symbol;Acc:HGNC:6057]	327.983	132.662	76.8111	151.514
ENSG00000110955	ATP5B	ATP synthase, H+ transporting, mitochondrial F1 complex, beta polypeptide [Source:HGNC Symbol;Acc:HGNC:830]	324.98	581.008	473.353	521.329
ENSG00000277443	MARCKS	myristoylated alanine-rich protein kinase C substrate [Source:HGNC Symbol;Acc:HGNC:6759]	321.594	174.864	177.555	207.155
ENSG00000231500	RPS18	ribosomal protein S18 [Source:HGNC Symbol;Acc:HGNC:10401]	311.333	77.2093	134.953	251.064
ENSG00000139970	RTN1	reticulon 1 [Source:HGNC Symbol;Acc:HGNC:10467]	308.851	481.846	192.702	262.131
ENSG00000105290	APLP1	amyloid beta (A4) precursor-like protein 1 [Source:HGNC Symbol;Acc:HGNC:597]	294.009	449.43	142.088	205.606
ENSG00000109472	CPE	carboxypeptidase E [Source:HGNC Symbol;Acc:HGNC:2303]	293.85	618.996	318.824	325.036
ENSG00000134986	NREP	neuronal regeneration related protein [Source:HGNC Symbol;Acc:HGNC:16834]	292.815	346.173	405.966	359.073
ENSG00000078369	GNB1	guanine nucleotide binding protein (G protein), beta polypeptide 1 [Source:HGNC Symbol;Acc:HGNC:4396]	290.618	400.279	251.384	281.985
ENSG00000100316	RPL3	ribosomal protein L3 [Source:HGNC Symbol;Acc:HGNC:10332]	289.525	110.67	218.555	183.615
ENSG00000137267	TUBB2A	tubulin, beta 2A class IIa [Source:HGNC Symbol;Acc:HGNC:12412]	289.389	878.306	699.7	416.144
ENSG00000111674	ENO2	enolase 2 (gamma, neuronal) [Source:HGNC Symbol;Acc:HGNC:3353]	283.931	165.844	25.5001	86.0531
ENSG00000162734	PEA15	phosphoprotein enriched in astrocytes 15 [Source:HGNC Symbol;Acc:HGNC:8822]	282.27	168.806	219.232	206.961
ENSG00000174748	RPL15	ribosomal protein L15 [Source:HGNC Symbol;Acc:HGNC:10306]	280.417	97.1062	150.739	122.956
ENSG00000177954	RPS27	ribosomal protein S27 [Source:HGNC Symbol;Acc:HGNC:10416]	278.089	118.364	374.794	249.954
ENSG00000142676	RPL11	ribosomal protein L11 [Source:HGNC Symbol;Acc:HGNC:10301]	272.427	163.072	282.944	194.688
ENSG00000111897	SERINC1	serine incorporator 1 [Source:HGNC Symbol;Acc:HGNC:13464]	271.212	337.968	224.373	220.036
ENSG00000110700	RPS13	ribosomal protein S13 [Source:HGNC Symbol;Acc:HGNC:10386]	267.116	157.681	302.365	195.885
ENSG00000118816	CCNI	cyclin I [Source:HGNC Symbol;Acc:HGNC:1595]	265.434	100.499	93.5732	82.07
ENSG00000067225	PKM	pyruvate kinase, muscle [Source:HGNC Symbol;Acc:HGNC:9021]	263.83	467.725	299.905	377.287
ENSG00000111716	LDHB	lactate dehydrogenase B [Source:HGNC Symbol;Acc:HGNC:6541]	263.028	108.776	101.687	128.716
ENSG00000174444	RPL4	ribosomal protein L4 [Source:HGNC Symbol;Acc:HGNC:10353]	262.271	296.625	549.057	577.091
ENSG00000272398	CD24	CD24 molecule [Source:HGNC Symbol;Acc:HGNC:1645]	254.935	258.218	427.185	155.202
ENSG00000177600	RPLP2	ribosomal protein, large, P2 [Source:HGNC Symbol;Acc:HGNC:10377]	253.926	150.464	194.144	169.002
ENSG00000108298	RPL19	ribosomal protein L19 [Source:HGNC Symbol;Acc:HGNC:10312]	251.152	208.725	390.982	371.953
ENSG00000170315	UBB	ubiquitin B [Source:HGNC Symbol;Acc:HGNC:12463]	250.619	179.26	225.244	157.534
ENSG00000162244	RPL29	ribosomal protein L29 [Source:HGNC Symbol;Acc:HGNC:10331]	249.741	86.8463	57.2668	66.9932
ENSG00000137154	RPS6	ribosomal protein S6 [Source:HGNC Symbol;Acc:HGNC:10429]	247.42	87.1583	194.952	197.662
ENSG00000102226	USP11	ubiquitin specific peptidase 11 [Source:HGNC Symbol;Acc:HGNC:12609]	242.57	26.3281	28.8472	47.1897
ENSG00000105223	PLD3	phospholipase D family, member 3 [Source:HGNC Symbol;Acc:HGNC:17158]	241.082	126.905	44.8418	95.7581
ENSG00000122026	RPL21	ribosomal protein L21 [Source:HGNC Symbol;Acc:HGNC:10313]	240.437	75.1035	156.039	141.803
ENSG00000186469	GNG2	guanine nucleotide binding protein (G protein), gamma 2 [Source:HGNC Symbol;Acc:HGNC:4404]	239.616	219.476	285.594	129.859
ENSG00000142541	RPL13A	ribosomal protein L13a [Source:HGNC Symbol;Acc:HGNC:10304]	239.538	227.741	331.522	307.683
ENSG00000204628	GNB2L1	guanine nucleotide binding protein (G protein), beta polypeptide 2-like 1 [Source:HGNC Symbol;Acc:HGNC:4399]	238.017	64.9523	143.24	158.087
ENSG00000100167	2003-09-01	septin 3 [Source:HGNC Symbol;Acc:HGNC:10750]	237.87	167.276	97.2805	95.1424
ENSG00000189060	H1F0	H1 histone family, member 0 [Source:HGNC Symbol;Acc:HGNC:4714]	236.12	50.2416	61.4358	86.2558
ENSG00000108654	DDX5	DEAD (Asp-Glu-Ala-Asp) box helicase 5 [Source:HGNC Symbol;Acc:HGNC:2746]	235.943	243.666	329.277	252.646
ENSG00000165119	HNRNPK	heterogeneous nuclear ribonucleoprotein K [Source:HGNC Symbol;Acc:HGNC:5044]	234.44	163.003	255.121	181.357
ENSG00000105409	ATP1A3	ATPase, Na+/K+ transporting, alpha 3 polypeptide [Source:HGNC Symbol;Acc:HGNC:801]	234.153	669.534	77.9765	364.191
ENSG00000115310	RTN4	reticulon 4 [Source:HGNC Symbol;Acc:HGNC:14085]	234.141	210.242	219.599	151.207
ENSG00000166165	CKB	creatine kinase, brain [Source:HGNC Symbol;Acc:HGNC:1991]	231.532	403.139	342.62	253.71
ENSG00000170027	YWHAG	tyrosine 3-monooxygenase/tryptophan 5-monooxygenase activation protein, gamma [Source:HGNC Symbol;Acc:HGNC:12852]	231.455	544.233	238.532	309.25
ENSG00000089157	RPLP0	ribosomal protein, large, P0 [Source:HGNC Symbol;Acc:HGNC:10371]	230.486	264.945	582.528	274.68
ENSG00000167996	FTH1	ferritin, heavy polypeptide 1 [Source:HGNC Symbol;Acc:HGNC:3976]	222.3	879.281	258.376	522.661
ENSG00000070087	PFN2	profilin 2 [Source:HGNC Symbol;Acc:HGNC:8882]	219.647	219.374	152.458	200.892
ENSG00000089220	PEBP1	phosphatidylethanolamine binding protein 1 [Source:HGNC Symbol;Acc:HGNC:8630]	218.984	294.233	247.389	146.66
ENSG00000161203	AP2M1	adaptor-related protein complex 2, mu 1 subunit [Source:HGNC Symbol;Acc:HGNC:564]	217.785	147.469	108.529	93.8212
ENSG00000092841	MYL6	myosin, light chain 6, alkali, smooth muscle and non-muscle [Source:HGNC Symbol;Acc:HGNC:7587]	215.993	244.898	350.975	330.098
ENSG00000128245	YWHAH	tyrosine 3-monooxygenase/tryptophan 5-monooxygenase activation protein, eta [Source:HGNC Symbol;Acc:HGNC:12853]	214.024	194.57	110.639	138.977
ENSG00000111669	TPI1	triosephosphate isomerase 1 [Source:HGNC Symbol;Acc:HGNC:12009]	213.773	357.423	89.2026	366.895
ENSG00000132475	H3F3B	H3 histone, family 3B (H3.3B) [Source:HGNC Symbol;Acc:HGNC:4765]	212.797	100.209	224.692	194.762
ENSG00000026025	VIM	vimentin [Source:HGNC Symbol;Acc:HGNC:12692]	212.001	77.7454	170.514	317.938
ENSG00000130985	UBA1	ubiquitin-like modifier activating enzyme 1 [Source:HGNC Symbol;Acc:HGNC:12469]	210.983	158.157	197.709	145.624
ENSG00000131711	MAP1B	microtubule-associated protein 1B [Source:HGNC Symbol;Acc:HGNC:6836]	210.736	209.252	342.032	152.046
ENSG00000149925	ALDOA	aldolase A, fructose-bisphosphate [Source:HGNC Symbol;Acc:HGNC:414]	210.093	549.24	194.33	600.443
ENSG00000149294	NCAM1	neural cell adhesion molecule 1 [Source:HGNC Symbol;Acc:HGNC:7656]	209.886	126.615	228.413	83.6765
ENSG00000167081	PBX3	pre-B-cell leukemia homeobox 3 [Source:HGNC Symbol;Acc:HGNC:8634]	207.581	7.81275	17.0829	34.4914
ENSG00000185787	MORF4L1	mortality factor 4 like 1 [Source:HGNC Symbol;Acc:HGNC:16989]	207.127	53.122	42.4732	47.2731
ENSG00000086061	DNAJA1	DnaJ (Hsp40) homolog, subfamily A, member 1 [Source:HGNC Symbol;Acc:HGNC:5229]	206.617	65.2389	64.5123	58.6988
ENSG00000157851	DPYSL5	dihydropyrimidinase-like 5 [Source:HGNC Symbol;Acc:HGNC:20637]	203.92	267.486	130.526	121.444
ENSG00000203879	GDI1	GDP dissociation inhibitor 1 [Source:HGNC Symbol;Acc:HGNC:4226]	202.173	204.68	150.258	147.876
ENSG00000143947	RPS27A	ribosomal protein S27a [Source:HGNC Symbol;Acc:HGNC:10417]	198.652	118.778	256.324	273.66
ENSG00000147403	RPL10	ribosomal protein L10 [Source:HGNC Symbol;Acc:HGNC:10298]	198.579	148.259	371.869	346.579
ENSG00000198755	RPL10A	ribosomal protein L10a [Source:HGNC Symbol;Acc:HGNC:10299]	197.004	92.4415	149.611	72.2742
ENSG00000179010	MRFAP1	Morf4 family associated protein 1 [Source:HGNC Symbol;Acc:HGNC:24549]	193.332	119.495	108.299	84.2547
ENSG00000102316	MAGED2	melanoma antigen family D2 [Source:HGNC Symbol;Acc:HGNC:16353]	193.313	46.3137	65.751	145.577
ENSG00000186310	NAP1L3	nucleosome assembly protein 1-like 3 [Source:HGNC Symbol;Acc:HGNC:7639]	190.848	24.6065	17.6621	26.32
ENSG00000078018	MAP2	microtubule-associated protein 2 [Source:HGNC Symbol;Acc:HGNC:6839]	190.282	221.786	338.801	154.594
ENSG00000126432	PRDX5	peroxiredoxin 5 [Source:HGNC Symbol;Acc:HGNC:9355]	189.785	64.9595	43.891	60.3614
ENSG00000101856	PGRMC1	progesterone receptor membrane component 1 [Source:HGNC Symbol;Acc:HGNC:16090]	189.449	218.363	142.721	223.643
ENSG00000189159	HN1	hematological and neurological expressed 1 [Source:HGNC Symbol;Acc:HGNC:14569]	187.433	245.858	421.907	199.304
ENSG00000145425	RPS3A	ribosomal protein S3A [Source:HGNC Symbol;Acc:HGNC:10421]	185.395	202.165	417.379	185.217
ENSG00000143761	ARF1	ADP-ribosylation factor 1 [Source:HGNC Symbol;Acc:HGNC:652]	184.609	187.911	146.558	161.117
ENSG00000187957	DNER	delta/notch-like EGF repeat containing [Source:HGNC Symbol;Acc:HGNC:24456]	184.439	173.673	103.843	82.8977
ENSG00000156482	RPL30	ribosomal protein L30 [Source:HGNC Symbol;Acc:HGNC:10333]	183.858	39.5311	84.8427	38.4987
ENSG00000140319	SRP14	signal recognition particle 14kDa (homologous Alu RNA binding protein) [Source:HGNC Symbol;Acc:HGNC:11299]	183.753	126.045	106.557	87.1129
ENSG00000113758	DBN1	drebrin 1 [Source:HGNC Symbol;Acc:HGNC:2695]	183.484	209.453	202.964	94.0827
ENSG00000213190	MLLT11	myeloid/lymphoid or mixed-lineage leukemia; translocated to, 11 [Source:HGNC Symbol;Acc:HGNC:16997]	182.696	387.646	213.141	230.765
ENSG00000179218	CALR	calreticulin [Source:HGNC Symbol;Acc:HGNC:1455]	181.844	193.372	185.37	317.595
ENSG00000171951	SCG2	secretogranin II [Source:HGNC Symbol;Acc:HGNC:10575]	181.714	75.7389	17.8813	142.522
ENSG00000133318	RTN3	reticulon 3 [Source:HGNC Symbol;Acc:HGNC:10469]	181.68	274.042	98.4777	196.152
ENSG00000143933	CALM2	calmodulin 2 (phosphorylase kinase, delta) [Source:HGNC Symbol;Acc:HGNC:1445]	181.131	517.118	326.369	267.895
ENSG00000136942	RPL35	ribosomal protein L35 [Source:HGNC Symbol;Acc:HGNC:10344]	180.357	102.521	176.619	128.388
ENSG00000077279	DCX	doublecortin [Source:HGNC Symbol;Acc:HGNC:2714]	176.267	96.2439	112.124	64.2219
ENSG00000114631	PODXL2	podocalyxin-like 2 [Source:HGNC Symbol;Acc:HGNC:17936]	174.092	96.7408	97.3641	70.9819
ENSG00000185551	NR2F2	nuclear receptor subfamily 2, group F, member 2 [Source:HGNC Symbol;Acc:HGNC:7976]	173.793	6.41533	5.89694	17.5127
ENSG00000046653	GPM6B	glycoprotein M6B [Source:HGNC Symbol;Acc:HGNC:4461]	173.48	203.685	166.856	113.168
ENSG00000104852	SNRNP70	small nuclear ribonucleoprotein 70kDa (U1) [Source:HGNC Symbol;Acc:HGNC:11150]	172.823	128.926	123.829	102.854
ENSG00000164924	YWHAZ	tyrosine 3-monooxygenase/tryptophan 5-monooxygenase activation protein, zeta [Source:HGNC Symbol;Acc:HGNC:12855]	170.96	221.85	208.871	144.757
ENSG00000139644	TMBIM6	transmembrane BAX inhibitor motif containing 6 [Source:HGNC Symbol;Acc:HGNC:11723]	170.657	118.89	104.039	130.306
ENSG00000181163	NPM1	nucleophosmin (nucleolar phosphoprotein B23, numatrin) [Source:HGNC Symbol;Acc:HGNC:7910]	170.136	121.599	263.351	296.019
ENSG00000107223	EDF1	endothelial differentiation-related factor 1 [Source:HGNC Symbol;Acc:HGNC:3164]	170.064	90.4668	66.5593	56.9489
ENSG00000092964	DPYSL2	dihydropyrimidinase-like 2 [Source:HGNC Symbol;Acc:HGNC:3014]	168.857	50.4505	378.909	52.275
ENSG00000101210	EEF1A2	eukaryotic translation elongation factor 1 alpha 2 [Source:HGNC Symbol;Acc:HGNC:3192]	167.946	221.356	75.5511	112.332
ENSG00000197457	STMN3	stathmin-like 3 [Source:HGNC Symbol;Acc:HGNC:15926]	167.406	694.651	360.535	294.075
ENSG00000166848	TERF2IP	telomeric repeat binding factor 2, interacting protein [Source:HGNC Symbol;Acc:HGNC:19246]	167.212	19.1287	21.961	20.8685
ENSG00000089009	RPL6	ribosomal protein L6 [Source:HGNC Symbol;Acc:HGNC:10362]	167.157	153.403	289.825	299.907
ENSG00000198910	L1CAM	L1 cell adhesion molecule [Source:HGNC Symbol;Acc:HGNC:6470]	166.498	147.666	74.1095	71.9685
ENSG00000135486	HNRNPA1	heterogeneous nuclear ribonucleoprotein A1 [Source:HGNC Symbol;Acc:HGNC:5031]	165.949	136.135	348.847	177.532
ENSG00000197694	SPTAN1	spectrin, alpha, non-erythrocytic 1 [Source:HGNC Symbol;Acc:HGNC:11273]	165.62	225.432	300.066	131.533
ENSG00000173812	EIF1	eukaryotic translation initiation factor 1 [Source:HGNC Symbol;Acc:HGNC:3249]	165.245	153.479	34.2731	181.743
ENSG00000150991	UBC	ubiquitin C [Source:HGNC Symbol;Acc:HGNC:12468]	164.721	11.7393	32.1596	3.77872
ENSG00000149557	FEZ1	fasciculation and elongation protein zeta 1 (zygin I) [Source:HGNC Symbol;Acc:HGNC:3659]	163.37	214.443	239.602	129.955
ENSG00000145741	BTF3	basic transcription factor 3 [Source:HGNC Symbol;Acc:HGNC:1125]	162.272	114.293	168.379	139.528
ENSG00000116560	SFPQ	splicing factor proline/glutamine-rich [Source:HGNC Symbol;Acc:HGNC:10774]	162.202	94.5334	114.816	78.427
ENSG00000149273	RPS3	ribosomal protein S3 [Source:HGNC Symbol;Acc:HGNC:10420]	162.041	103.499	159.613	139.308
ENSG00000220205	VAMP2	vesicle-associated membrane protein 2 (synaptobrevin 2) [Source:HGNC Symbol;Acc:HGNC:12643]	161.967	496.751	31.0048	241.746
ENSG00000120885	CLU	clusterin [Source:HGNC Symbol;Acc:HGNC:2095]	161.43	111.081	77.3193	122.492
ENSG00000185236	RAB11B	RAB11B, member RAS oncogene family [Source:HGNC Symbol;Acc:HGNC:9761]	161.371	18.1724	16.7949	27.3441
ENSG00000143742	SRP9	signal recognition particle 9kDa [Source:HGNC Symbol;Acc:HGNC:11304]	161.007	5.31877	6.69967	13.3131
ENSG00000105696	TMEM59L	transmembrane protein 59-like [Source:HGNC Symbol;Acc:HGNC:13237]	158.413	48.7687	19.5087	19.7888
ENSG00000035862	TIMP2	TIMP metallopeptidase inhibitor 2 [Source:HGNC Symbol;Acc:HGNC:11821]	156.825	143.916	51.1164	116.664
ENSG00000006128	TAC1	tachykinin, precursor 1 [Source:HGNC Symbol;Acc:HGNC:11517]	156.629	7.36383	1.22737	1.06209
ENSG00000186868	MAPT	microtubule-associated protein tau [Source:HGNC Symbol;Acc:HGNC:6893]	154.324	366.912	363.75	245.496
ENSG00000137818	RPLP1	ribosomal protein, large, P1 [Source:HGNC Symbol;Acc:HGNC:10372]	153.985	704.729	702.695	498.791
ENSG00000130294	KIF1A	kinesin family member 1A [Source:HGNC Symbol;Acc:HGNC:888]	153.885	203.91	143.203	132.878
ENSG00000116288	PARK7	parkinson protein 7 [Source:HGNC Symbol;Acc:HGNC:16369]	153.88	95.1264	90.3548	90.942
ENSG00000176340	COX8A	cytochrome c oxidase subunit VIIIA (ubiquitous) [Source:HGNC Symbol;Acc:HGNC:2294]	153.116	395.153	172.157	226.905
ENSG00000083845	RPS5	ribosomal protein S5 [Source:HGNC Symbol;Acc:HGNC:10426]	152.937	249.998	457.177	424.552
ENSG00000070831	CDC42	cell division cycle 42 [Source:HGNC Symbol;Acc:HGNC:1736]	152.585	215.582	242.265	233.087
ENSG00000166598	HSP90B1	heat shock protein 90kDa beta (Grp94), member 1 [Source:HGNC Symbol;Acc:HGNC:12028]	152.33	81.6678	82.5012	169.777
ENSG00000204580	DDR1	discoidin domain receptor tyrosine kinase 1 [Source:HGNC Symbol;Acc:HGNC:2730]	152.262	24.8542	28.9661	47.1836
ENSG00000169567	HINT1	histidine triad nucleotide binding protein 1 [Source:HGNC Symbol;Acc:HGNC:4912]	152.081	269.676	228.242	212.974
ENSG00000105640	RPL18A	ribosomal protein L18a [Source:HGNC Symbol;Acc:HGNC:10311]	151.887	106.285	235.573	183.055
ENSG00000188322	SBK1	SH3 domain binding kinase 1 [Source:HGNC Symbol;Acc:HGNC:17699]	151.107	131.12	156.922	88.9966
ENSG00000102409	BEX4	brain expressed, X-linked 4 [Source:HGNC Symbol;Acc:HGNC:25475]	149.142	37.6713	28.2835	19.5512
ENSG00000175745	NR2F1	nuclear receptor subfamily 2, group F, member 1 [Source:HGNC Symbol;Acc:HGNC:7975]	148.895	68.322	32.9379	28.6401
ENSG00000171033	PKIA	protein kinase (cAMP-dependent, catalytic) inhibitor alpha [Source:HGNC Symbol;Acc:HGNC:9017]	148.134	156.131	201.744	152.587
ENSG00000114942	EEF1B2	eukaryotic translation elongation factor 1 beta 2 [Source:HGNC Symbol;Acc:HGNC:3208]	147.817	96.9893	138.091	176.261
ENSG00000105649	RAB3A	RAB3A, member RAS oncogene family [Source:HGNC Symbol;Acc:HGNC:9777]	147.745	322.36	129.937	156.801
ENSG00000173660	UQCRH	ubiquinol-cytochrome c reductase hinge protein [Source:HGNC Symbol;Acc:HGNC:12590]	146.364	112.463	149.745	150.598
ENSG00000102003	SYP	synaptophysin [Source:HGNC Symbol;Acc:HGNC:11506]	146.128	242.008	39.7897	114.113
ENSG00000084234	APLP2	amyloid beta (A4) precursor-like protein 2 [Source:HGNC Symbol;Acc:HGNC:598]	145.676	165.984	91.7896	167.841
ENSG00000168824	D4S234E	Neuron-specific protein family member 1 [Source:UniProtKB/Swiss-Prot;Acc:P42857]	145.655	282.004	268.262	162.983
ENSG00000119335	SET	SET nuclear proto-oncogene [Source:HGNC Symbol;Acc:HGNC:10760]	145.595	63.5814	149.025	60.0728
ENSG00000124422	USP22	ubiquitin specific peptidase 22 [Source:HGNC Symbol;Acc:HGNC:12621]	145.328	160.373	198.918	124.943
ENSG00000179222	MAGED1	melanoma antigen family D1 [Source:HGNC Symbol;Acc:HGNC:6813]	144.576	255.067	297.206	358.86
ENSG00000182899	RPL35A	ribosomal protein L35a [Source:HGNC Symbol;Acc:HGNC:10345]	143.968	19.2537	30.3498	46.4739
ENSG00000127022	CANX	calnexin [Source:HGNC Symbol;Acc:HGNC:1473]	142.741	82.4541	141.35	137.885
ENSG00000168374	ARF4	ADP-ribosylation factor 4 [Source:HGNC Symbol;Acc:HGNC:655]	142.277	83.1323	70.9913	117.755
ENSG00000144713	RPL32	ribosomal protein L32 [Source:HGNC Symbol;Acc:HGNC:10336]	141.636	189.505	339.211	287.494
ENSG00000152795	HNRNPDL	heterogeneous nuclear ribonucleoprotein D-like [Source:HGNC Symbol;Acc:HGNC:5037]	141.194	100.007	114.117	85.8492
ENSG00000255302	EID1	EP300 interacting inhibitor of differentiation 1 [Source:HGNC Symbol;Acc:HGNC:1191]	140.516	194.473	212.227	197.59
ENSG00000137726	FXYD6	FXYD domain containing ion transport regulator 6 [Source:HGNC Symbol;Acc:HGNC:4030]	140.495	167.434	149.768	156.304
ENSG00000112972	HMGCS1	3-hydroxy-3-methylglutaryl-CoA synthase 1 (soluble) [Source:HGNC Symbol;Acc:HGNC:5007]	140.266	496.844	366.207	364.638
ENSG00000170540	ARL6IP1	ADP-ribosylation factor-like 6 interacting protein 1 [Source:HGNC Symbol;Acc:HGNC:697]	138.429	121.438	110.444	111.836
ENSG00000172270	BSG	basigin (Ok blood group) [Source:HGNC Symbol;Acc:HGNC:1116]	138.238	365.064	150.312	380.728
ENSG00000075785	RAB7A	RAB7A, member RAS oncogene family [Source:HGNC Symbol;Acc:HGNC:9788]	138.217	143.613	70.4565	140.269
ENSG00000099622	CIRBP	cold inducible RNA binding protein [Source:HGNC Symbol;Acc:HGNC:1982]	137.311	73.6817	84.0126	84.0469
ENSG00000135916	ITM2C	integral membrane protein 2C [Source:HGNC Symbol;Acc:HGNC:6175]	136.48	87.0951	52.2207	112.069
ENSG00000075618	FSCN1	fascin actin-bundling protein 1 [Source:HGNC Symbol;Acc:HGNC:11148]	135.73	256.876	137.08	142.254
ENSG00000168280	KIF5C	kinesin family member 5C [Source:HGNC Symbol;Acc:HGNC:6325]	134.929	154.139	175.976	109.695
ENSG00000128272	ATF4	activating transcription factor 4 [Source:HGNC Symbol;Acc:HGNC:786]	134.753	100.779	74.8957	90.7459
ENSG00000147604	RPL7	ribosomal protein L7 [Source:HGNC Symbol;Acc:HGNC:10363]	134.622	131.965	371.92	324.948
ENSG00000130255	RPL36	ribosomal protein L36 [Source:HGNC Symbol;Acc:HGNC:13631]	134.14	218.408	244.414	201.026
ENSG00000136295	TTYH3	tweety family member 3 [Source:HGNC Symbol;Acc:HGNC:22222]	134.094	153.127	43.9393	73.8268
ENSG00000078668	VDAC3	voltage-dependent anion channel 3 [Source:HGNC Symbol;Acc:HGNC:12674]	133.502	99.3692	127.749	111.227
ENSG00000092096	SLC22A17	solute carrier family 22, member 17 [Source:HGNC Symbol;Acc:HGNC:23095]	133.447	213.788	85.8568	128.606
ENSG00000213923	CSNK1E	casein kinase 1, epsilon [Source:HGNC Symbol;Acc:HGNC:2453]	133.208	72.0019	88.3029	48.7467
ENSG00000105372	RPS19	ribosomal protein S19 [Source:HGNC Symbol;Acc:HGNC:10402]	133.051	51.3788	113.031	86.0756
ENSG00000118181	RPS25	ribosomal protein S25 [Source:HGNC Symbol;Acc:HGNC:10413]	132.621	190.799	436.045	299.487
ENSG00000067840	PDZD4	PDZ domain containing 4 [Source:HGNC Symbol;Acc:HGNC:21167]	132.343	42.0117	50.1727	30.9714
ENSG00000023734	STRAP	serine/threonine kinase receptor associated protein [Source:HGNC Symbol;Acc:HGNC:30796]	131.932	71.5535	66.9737	65.6444
ENSG00000205336	ADGRG1	adhesion G protein-coupled receptor G1 [Source:HGNC Symbol;Acc:HGNC:4512]	131.81	37.8634	34.4213	38.3668
ENSG00000129951	LPPR3	Lipid phosphate phosphatase-related protein type 3 [Source:UniProtKB/Swiss-Prot;Acc:Q6T4P5]	131.496	101.353	104.215	71.8162
ENSG00000196262	PPIA	peptidylprolyl isomerase A (cyclophilin A) [Source:HGNC Symbol;Acc:HGNC:9253]	131.168	177.427	215.391	156.447
ENSG00000103363	TCEB2	transcription elongation factor B (SIII), polypeptide 2 (18kDa, elongin B) [Source:HGNC Symbol;Acc:HGNC:11619]	131.032	238.873	252.006	213.104
ENSG00000104960	PTOV1	prostate tumor overexpressed 1 [Source:HGNC Symbol;Acc:HGNC:9632]	130.371	74.6925	81.856	73.7888
ENSG00000071082	RPL31	ribosomal protein L31 [Source:HGNC Symbol;Acc:HGNC:10334]	130.336	122.498	320.637	198.689
ENSG00000168028	RPSA	ribosomal protein SA [Source:HGNC Symbol;Acc:HGNC:6502]	129.967	179.211	422.086	287.547
ENSG00000184897	H1FX	H1 histone family, member X [Source:HGNC Symbol;Acc:HGNC:4722]	129.114	40.7309	6.1414	13.1872
ENSG00000105520	LPPR2	Lipid phosphate phosphatase-related protein type 2 [Source:UniProtKB/Swiss-Prot;Acc:Q96GM1]	129.069	124.041	40.6751	46.8507
ENSG00000105701	FKBP8	FK506 binding protein 8, 38kDa [Source:HGNC Symbol;Acc:HGNC:3724]	128.21	106.155	110.089	90.7112
ENSG00000126267	COX6B1	cytochrome c oxidase subunit VIb polypeptide 1 (ubiquitous) [Source:HGNC Symbol;Acc:HGNC:2280]	128.072	319.271	333.712	291.551
ENSG00000178719	GRINA	glutamate receptor, ionotropic, N-methyl D-aspartate-associated protein 1 (glutamate binding) [Source:HGNC Symbol;Acc:HGNC:4589]	128.015	149.151	89.0828	119.257
ENSG00000168653	NDUFS5	NADH dehydrogenase (ubiquinone) Fe-S protein 5, 15kDa (NADH-coenzyme Q reductase) [Source:HGNC Symbol;Acc:HGNC:7712]	127.181	68.9013	61.8996	17.318
ENSG00000122566	HNRNPA2B1	heterogeneous nuclear ribonucleoprotein A2/B1 [Source:HGNC Symbol;Acc:HGNC:5033]	127.11	223.611	128.961	190.602
ENSG00000130558	OLFM1	olfactomedin 1 [Source:HGNC Symbol;Acc:HGNC:17187]	126.589	230.375	69.7373	140.194
ENSG00000163682	RPL9	ribosomal protein L9 [Source:HGNC Symbol;Acc:HGNC:10369]	125.945	68.7266	146.211	110.552
ENSG00000014641	MDH1	malate dehydrogenase 1, NAD (soluble) [Source:HGNC Symbol;Acc:HGNC:6970]	125.596	198.663	104.599	159.13
ENSG00000101367	MAPRE1	microtubule-associated protein, RP/EB family, member 1 [Source:HGNC Symbol;Acc:HGNC:6890]	125.55	41.3903	44.8127	47.614
ENSG00000115053	NCL	nucleolin [Source:HGNC Symbol;Acc:HGNC:7667]	125.366	41.1876	39.6449	62.9779
ENSG00000099783	HNRNPM	heterogeneous nuclear ribonucleoprotein M [Source:HGNC Symbol;Acc:HGNC:5046]	124.993	36.9374	39.024	41.3677
ENSG00000128524	ATP6V1F	ATPase, H+ transporting, lysosomal 14kDa, V1 subunit F [Source:HGNC Symbol;Acc:HGNC:16832]	124.729	79.8965	70.5997	68.6998
ENSG00000171858	RPS21	ribosomal protein S21 [Source:HGNC Symbol;Acc:HGNC:10409]	124.475	271.726	292.592	246.272
ENSG00000171617	ENC1	ectodermal-neural cortex 1 (with BTB domain) [Source:HGNC Symbol;Acc:HGNC:3345]	124.087	157.878	177.592	57.3958
ENSG00000159409	CELF3	CUGBP, Elav-like family member 3 [Source:HGNC Symbol;Acc:HGNC:11967]	124.024	104.494	41.7228	25.9001
ENSG00000132872	SYT4	synaptotagmin IV [Source:HGNC Symbol;Acc:HGNC:11512]	123.42	86.8614	132.468	47.0565
ENSG00000113140	SPARC	secreted protein, acidic, cysteine-rich (osteonectin) [Source:HGNC Symbol;Acc:HGNC:11219]	123.27	84.892	109.439	905.229
ENSG00000178531	CTXN1	cortexin 1 [Source:HGNC Symbol;Acc:HGNC:31108]	122.822	249.405	74.146	65.5497
ENSG00000138326	RPS24	ribosomal protein S24 [Source:HGNC Symbol;Acc:HGNC:10411]	122.814	205.476	453.163	406.591
ENSG00000132507	EIF5A	eukaryotic translation initiation factor 5A [Source:HGNC Symbol;Acc:HGNC:3300]	122.792	302.116	188.99	227.074
ENSG00000182636	NDN	necdin, melanoma antigen (MAGE) family member [Source:HGNC Symbol;Acc:HGNC:7675]	122.778	250.832	144.31	293.899
ENSG00000137409	MTCH1	mitochondrial carrier 1 [Source:HGNC Symbol;Acc:HGNC:17586]	122.487	216.548	166.969	201.866
ENSG00000089693	MLF2	myeloid leukemia factor 2 [Source:HGNC Symbol;Acc:HGNC:7126]	121.873	155.121	78.4855	72.7438
ENSG00000136888	ATP6V1G1	ATPase, H+ transporting, lysosomal 13kDa, V1 subunit G1 [Source:HGNC Symbol;Acc:HGNC:864]	121.047	68.3356	111.605	70.5316
ENSG00000167815	PRDX2	peroxiredoxin 2 [Source:HGNC Symbol;Acc:HGNC:9353]	120.758	203.399	277.339	189.341
ENSG00000109180	OCIAD1	OCIA domain containing 1 [Source:HGNC Symbol;Acc:HGNC:16074]	120.246	57.892	48.6837	65.7307
ENSG00000132718	SYT11	synaptotagmin XI [Source:HGNC Symbol;Acc:HGNC:19239]	120.214	130.416	95.0853	85.242
ENSG00000176903	PNMA1	paraneoplastic Ma antigen 1 [Source:HGNC Symbol;Acc:HGNC:9158]	120.089	3.21265	3.06487	0.948009
ENSG00000015592	STMN4	stathmin-like 4 [Source:HGNC Symbol;Acc:HGNC:16078]	119.855	260.908	179.196	162.27
ENSG00000136854	STXBP1	syntaxin binding protein 1 [Source:HGNC Symbol;Acc:HGNC:11444]	119.841	293.389	66.5922	162.042
ENSG00000162512	SDC3	syndecan 3 [Source:HGNC Symbol;Acc:HGNC:10660]	119.779	167.848	64.3677	142.526
ENSG00000100201	DDX17	DEAD (Asp-Glu-Ala-Asp) box helicase 17 [Source:HGNC Symbol;Acc:HGNC:2740]	119.606	94.4836	106.441	105.633
ENSG00000124766	SOX4	SRY (sex determining region Y)-box 4 [Source:HGNC Symbol;Acc:HGNC:11200]	119.532	28.322	38.1194	14.0427
ENSG00000196405	EVL	Enah/Vasp-like [Source:HGNC Symbol;Acc:HGNC:20234]	119.405	113.268	79.4085	72.9359
ENSG00000131507	NDFIP1	Nedd4 family interacting protein 1 [Source:HGNC Symbol;Acc:HGNC:17592]	119.036	497.722	230.692	330.508
ENSG00000133134	BEX2	brain expressed X-linked 2 [Source:HGNC Symbol;Acc:HGNC:30933]	118.951	230.388	168.928	182.755
ENSG00000167614	TTYH1	tweety family member 1 [Source:HGNC Symbol;Acc:HGNC:13476]	117.572	56.5713	42.8686	54.8109
ENSG00000243449	C4orf48	chromosome 4 open reading frame 48 [Source:HGNC Symbol;Acc:HGNC:34437]	117.506	73.0349	34.8112	20.0682
ENSG00000105767	CADM4	cell adhesion molecule 4 [Source:HGNC Symbol;Acc:HGNC:30825]	116.861	185.046	115.447	84.4519
ENSG00000136930	PSMB7	proteasome (prosome, macropain) subunit, beta type, 7 [Source:HGNC Symbol;Acc:HGNC:9544]	116.831	31.3752	31.159	29.1317
ENSG00000018189	RUFY3	RUN and FYVE domain containing 3 [Source:HGNC Symbol;Acc:HGNC:30285]	116.738	95.8571	105.234	80.217
ENSG00000149806	FAU	Finkel-Biskis-Reilly murine sarcoma virus (FBR-MuSV) ubiquitously expressed [Source:HGNC Symbol;Acc:HGNC:3597]	116.614	191.79	200.75	169.352
ENSG00000172354	GNB2	guanine nucleotide binding protein (G protein), beta polypeptide 2 [Source:HGNC Symbol;Acc:HGNC:4398]	116.61	270.755	215.884	166.705
ENSG00000108468	CBX1	chromobox homolog 1 [Source:HGNC Symbol;Acc:HGNC:1551]	116.018	25.7584	45.1937	34.8349
ENSG00000102225	CDK16	cyclin-dependent kinase 16 [Source:HGNC Symbol;Acc:HGNC:8749]	115.994	106.551	54.2503	73.8995
ENSG00000166226	CCT2	chaperonin containing TCP1, subunit 2 (beta) [Source:HGNC Symbol;Acc:HGNC:1615]	115.944	127.711	181.271	143.786
ENSG00000172201	ID4	inhibitor of DNA binding 4, dominant negative helix-loop-helix protein [Source:HGNC Symbol;Acc:HGNC:5363]	115.415	38.2955	43.9155	78.2069
ENSG00000165629	ATP5C1	ATP synthase, H+ transporting, mitochondrial F1 complex, gamma polypeptide 1 [Source:HGNC Symbol;Acc:HGNC:833]	115.362	118.367	124.543	112.745
ENSG00000198794	SCAMP5	secretory carrier membrane protein 5 [Source:HGNC Symbol;Acc:HGNC:30386]	114.926	137.773	73.6923	83.6728
ENSG00000128564	VGF	VGF nerve growth factor inducible [Source:HGNC Symbol;Acc:HGNC:12684]	114.811	77.5354	8.55623	62.0706
ENSG00000088986	DYNLL1	dynein, light chain, LC8-type 1 [Source:HGNC Symbol;Acc:HGNC:15476]	114.78	127.982	99.596	72.9801
ENSG00000182272	B4GALNT4	beta-1,4-N-acetyl-galactosaminyl transferase 4 [Source:HGNC Symbol;Acc:HGNC:26315]	114.672	40.5382	34.3042	25.2523
ENSG00000131469	RPL27	ribosomal protein L27 [Source:HGNC Symbol;Acc:HGNC:10328]	114.382	124.447	193.474	165.249
ENSG00000120438	TCP1	t-complex 1 [Source:HGNC Symbol;Acc:HGNC:11655]	114.264	57.2773	89.4789	74.14
ENSG00000177519	RPRM	reprimo, TP53 dependent G2 arrest mediator candidate [Source:HGNC Symbol;Acc:HGNC:24201]	114.052	64.1048	35.5182	23.1666
ENSG00000127184	COX7C	cytochrome c oxidase subunit VIIc [Source:HGNC Symbol;Acc:HGNC:2292]	114.001	89.0849	101.045	47.3039
ENSG00000135624	CCT7	chaperonin containing TCP1, subunit 7 (eta) [Source:HGNC Symbol;Acc:HGNC:1622]	113.511	65.2321	82.2076	68.0138
ENSG00000147140	NONO	non-POU domain containing, octamer-binding [Source:HGNC Symbol;Acc:HGNC:7871]	112.883	88.4717	159.246	98.6671
ENSG00000171533	MAP6	microtubule-associated protein 6 [Source:HGNC Symbol;Acc:HGNC:6868]	112.553	78.9878	39.3775	53.7391
ENSG00000162545	CAMK2N1	calcium/calmodulin-dependent protein kinase II inhibitor 1 [Source:HGNC Symbol;Acc:HGNC:24190]	112.323	37.2578	10.4817	24.5559
ENSG00000009307	CSDE1	cold shock domain containing E1, RNA-binding [Source:HGNC Symbol;Acc:HGNC:29905]	112.079	33.6583	149.399	57.0883
ENSG00000050165	DKK3	dickkopf WNT signaling pathway inhibitor 3 [Source:HGNC Symbol;Acc:HGNC:2893]	111.928	24.5446	21.9324	14.287
ENSG00000103034	NDRG4	NDRG family member 4 [Source:HGNC Symbol;Acc:HGNC:14466]	111.85	386.984	130.089	190.112
ENSG00000022267	FHL1	four and a half LIM domains 1 [Source:HGNC Symbol;Acc:HGNC:3702]	111.755	75.0846	39.4137	67.674
ENSG00000084764	MAPRE3	microtubule-associated protein, RP/EB family, member 3 [Source:HGNC Symbol;Acc:HGNC:6892]	111.711	67.8899	18.8428	37.5281
ENSG00000171603	CLSTN1	calsyntenin 1 [Source:HGNC Symbol;Acc:HGNC:17447]	111.67	217.829	141.496	147.464
ENSG00000112695	COX7A2	cytochrome c oxidase subunit VIIa polypeptide 2 (liver) [Source:HGNC Symbol;Acc:HGNC:2288]	111.374	133.807	151.382	112.63
ENSG00000008988	RPS20	ribosomal protein S20 [Source:HGNC Symbol;Acc:HGNC:10405]	111.293	38.804	71.4553	74.1209
ENSG00000132639	SNAP25	synaptosomal-associated protein, 25kDa [Source:HGNC Symbol;Acc:HGNC:11132]	111.139	159.772	35.7072	92.6478
ENSG00000136238	RAC1	ras-related C3 botulinum toxin substrate 1 (rho family, small GTP binding protein Rac1) [Source:HGNC Symbol;Acc:HGNC:9801]	109.51	76.2281	65.9765	70.1523
ENSG00000159164	SV2A	synaptic vesicle glycoprotein 2A [Source:HGNC Symbol;Acc:HGNC:20566]	109.498	115.115	41.3204	78.8341
ENSG00000170035	UBE2E3	ubiquitin-conjugating enzyme E2E 3 [Source:HGNC Symbol;Acc:HGNC:12479]	109.408	77.0852	94.2692	57.3964
ENSG00000006125	AP2B1	adaptor-related protein complex 2, beta 1 subunit [Source:HGNC Symbol;Acc:HGNC:563]	109.388	104.802	89.9023	93.9221
ENSG00000133112	TPT1	tumor protein, translationally-controlled 1 [Source:HGNC Symbol;Acc:HGNC:12022]	109.29	288.606	383.43	532.084
ENSG00000101843	PSMD10	proteasome (prosome, macropain) 26S subunit, non-ATPase, 10 [Source:HGNC Symbol;Acc:HGNC:9555]	109.135	9.24371	8.73681	12.3436
ENSG00000210194	MT-TE	mitochondrially encoded tRNA glutamic acid [Source:HGNC Symbol;Acc:HGNC:7479]	108.85	93.9946	7.47393	53.5177
ENSG00000196123	KIAA0895L	KIAA0895-like [Source:HGNC Symbol;Acc:HGNC:34408]	108.686	39.8688	13.9055	22.4956
ENSG00000182774	RPS17	ribosomal protein S17 [Source:HGNC Symbol;Acc:HGNC:10397]	108.629	198.446	411.289	307.357
ENSG00000197756	RPL37A	ribosomal protein L37a [Source:HGNC Symbol;Acc:HGNC:10348]	108.178	177.15	436.038	267.924
ENSG00000142657	PGD	phosphogluconate dehydrogenase [Source:HGNC Symbol;Acc:HGNC:8891]	107.906	21.8207	16.4955	35.6867
ENSG00000143621	ILF2	interleukin enhancer binding factor 2 [Source:HGNC Symbol;Acc:HGNC:6037]	107.386	29.8136	57.043	39.0463
ENSG00000176956	LY6H	lymphocyte antigen 6 complex, locus H [Source:HGNC Symbol;Acc:HGNC:6728]	106.793	109.872	44.2789	50.3279
ENSG00000122565	CBX3	chromobox homolog 3 [Source:HGNC Symbol;Acc:HGNC:1553]	106.646	22.2908	49.6353	22.0435
ENSG00000111775	COX6A1	cytochrome c oxidase subunit VIa polypeptide 1 [Source:HGNC Symbol;Acc:HGNC:2277]	106.544	386.652	204.142	189.156
ENSG00000118680	MYL12B	myosin, light chain 12B, regulatory [Source:HGNC Symbol;Acc:HGNC:29827]	106.391	159.594	145.099	91.4684
ENSG00000071575	TRIB2	tribbles pseudokinase 2 [Source:HGNC Symbol;Acc:HGNC:30809]	106.009	24.8451	38.1377	42.2483
ENSG00000130726	TRIM28	tripartite motif containing 28 [Source:HGNC Symbol;Acc:HGNC:16384]	105.197	76.2878	138.836	97.651
ENSG00000213585	VDAC1	voltage-dependent anion channel 1 [Source:HGNC Symbol;Acc:HGNC:12669]	104.656	216.923	116.163	219.174
ENSG00000170899	GSTA4	glutathione S-transferase alpha 4 [Source:HGNC Symbol;Acc:HGNC:4629]	104.56	20.5256	22.8625	53.2578
ENSG00000106537	TSPAN13	tetraspanin 13 [Source:HGNC Symbol;Acc:HGNC:21643]	104.516	149.554	107.882	106.665
ENSG00000084731	KIF3C	kinesin family member 3C [Source:HGNC Symbol;Acc:HGNC:6321]	104.465	52.5727	48.8132	28.2628
ENSG00000116871	MAP7D1	MAP7 domain containing 1 [Source:HGNC Symbol;Acc:HGNC:25514]	104.422	93.3115	55.1602	48.8744
ENSG00000144381	HSPD1	heat shock 60kDa protein 1 (chaperonin) [Source:HGNC Symbol;Acc:HGNC:5261]	104.31	77.0511	94.9166	98.7034
ENSG00000105568	PPP2R1A	protein phosphatase 2, regulatory subunit A, alpha [Source:HGNC Symbol;Acc:HGNC:9302]	104.174	334.795	224.9	270.715
ENSG00000102144	PGK1	phosphoglycerate kinase 1 [Source:HGNC Symbol;Acc:HGNC:8896]	104.114	202.441	99.4824	229.157
ENSG00000121774	KHDRBS1	KH domain containing, RNA binding, signal transduction associated 1 [Source:HGNC Symbol;Acc:HGNC:18116]	104.068	45.2291	37.8716	48.1939
ENSG00000168159	RNF187	ring finger protein 187 [Source:HGNC Symbol;Acc:HGNC:27146]	103.791	257.252	136.93	153.474
ENSG00000163468	CCT3	chaperonin containing TCP1, subunit 3 (gamma) [Source:HGNC Symbol;Acc:HGNC:1616]	103.723	56.6088	91.8718	71.0029
ENSG00000166313	APBB1	amyloid beta (A4) precursor protein-binding, family B, member 1 (Fe65) [Source:HGNC Symbol;Acc:HGNC:581]	103.103	144.052	86.2371	76.6802
ENSG00000135404	CD63	CD63 molecule [Source:HGNC Symbol;Acc:HGNC:1692]	103.102	49.0477	35.1961	226.572
ENSG00000156976	EIF4A2	eukaryotic translation initiation factor 4A2 [Source:HGNC Symbol;Acc:HGNC:3284]	102.89	181.751	208.832	153.492
ENSG00000138069	RAB1A	RAB1A, member RAS oncogene family [Source:HGNC Symbol;Acc:HGNC:9758]	102.694	109.278	72.1099	104.935
ENSG00000198961	PJA2	praja ring finger 2, E3 ubiquitin protein ligase [Source:HGNC Symbol;Acc:HGNC:17481]	102.693	118.524	87.3072	106.353
ENSG00000135940	COX5B	cytochrome c oxidase subunit Vb [Source:HGNC Symbol;Acc:HGNC:2269]	102.409	120.914	95.043	100.96
ENSG00000144834	TAGLN3	transgelin 3 [Source:HGNC Symbol;Acc:HGNC:29868]	102.313	110.397	78.3895	53.5731
ENSG00000101182	PSMA7	proteasome (prosome, macropain) subunit, alpha type, 7 [Source:HGNC Symbol;Acc:HGNC:9536]	102.31	77.476	89.7976	64.4699
ENSG00000136810	TXN	thioredoxin [Source:HGNC Symbol;Acc:HGNC:12435]	102.204	130.913	98.9033	85.4877
ENSG00000132692	BCAN	brevican [Source:HGNC Symbol;Acc:HGNC:23059]	102.075	32.5491	70.81	49.7616
ENSG00000164091	WDR82	WD repeat domain 82 [Source:HGNC Symbol;Acc:HGNC:28826]	101.793	49.8867	87.4741	60.596
ENSG00000105270	CLIP3	CAP-GLY domain containing linker protein 3 [Source:HGNC Symbol;Acc:HGNC:24314]	101.759	208.281	26.9724	95.5044
ENSG00000186468	RPS23	ribosomal protein S23 [Source:HGNC Symbol;Acc:HGNC:10410]	101.6	111.959	294.462	181.043
ENSG00000079462	PAFAH1B3	platelet-activating factor acetylhydrolase 1b, catalytic subunit 3 (29kDa) [Source:HGNC Symbol;Acc:HGNC:8576]	101.464	72.4033	100.771	80.174
ENSG00000114391	RPL24	ribosomal protein L24 [Source:HGNC Symbol;Acc:HGNC:10325]	101.214	22.8104	30.0735	36.6036
ENSG00000176749	CDK5R1	cyclin-dependent kinase 5, regulatory subunit 1 (p35) [Source:HGNC Symbol;Acc:HGNC:1775]	101.197	126.461	131.815	41.8089
ENSG00000134313	KIDINS220	kinase D-interacting substrate, 220kDa [Source:HGNC Symbol;Acc:HGNC:29508]	101.079	67.6115	121.958	65.5778
ENSG00000123144	C19orf43	chromosome 19 open reading frame 43 [Source:HGNC Symbol;Acc:HGNC:28424]	100.997	91.855	67.7749	51.0416
ENSG00000166619	BLCAP	bladder cancer associated protein [Source:HGNC Symbol;Acc:HGNC:1055]	100.456	54.2521	45.4321	110.025
ENSG00000198911	SREBF2	sterol regulatory element binding transcription factor 2 [Source:HGNC Symbol;Acc:HGNC:11290]	100.371	76.8432	32.0086	56.7559
ENSG00000108828	VAT1	vesicle amine transport 1 [Source:HGNC Symbol;Acc:HGNC:16919]	99.8623	44.4096	33.7202	102.266
ENSG00000135387	CAPRIN1	cell cycle associated protein 1 [Source:HGNC Symbol;Acc:HGNC:6743]	99.575	67.0981	119.534	87.7903
ENSG00000174871	CNIH2	cornichon family AMPA receptor auxiliary protein 2 [Source:HGNC Symbol;Acc:HGNC:28744]	99.4044	341.062	109.728	88.0236
ENSG00000089280	FUS	FUS RNA binding protein [Source:HGNC Symbol;Acc:HGNC:4010]	98.8435	68.6354	6.84596	82.2227
ENSG00000104964	AES	amino-terminal enhancer of split [Source:HGNC Symbol;Acc:HGNC:307]	98.5118	259.282	155.819	208.315
ENSG00000115268	RPS15	ribosomal protein S15 [Source:HGNC Symbol;Acc:HGNC:10388]	98.4452	357.05	514.373	457.773
ENSG00000091972	CD200	CD200 molecule [Source:HGNC Symbol;Acc:HGNC:7203]	98.1441	123.302	60.5449	80.7249
ENSG00000182670	TTC3	tetratricopeptide repeat domain 3 [Source:HGNC Symbol;Acc:HGNC:12393]	98.0873	154.587	211.316	199.88
ENSG00000136193	SCRN1	secernin 1 [Source:HGNC Symbol;Acc:HGNC:22192]	97.3777	78.8015	82.3619	50.9581
ENSG00000168385	2002-09-01	septin 2 [Source:HGNC Symbol;Acc:HGNC:7729]	97.3631	25.4757	62.6582	64.4058
ENSG00000100320	RBFOX2	RNA binding protein, fox-1 homolog (C. elegans) 2 [Source:HGNC Symbol;Acc:HGNC:9906]	97.3393	57.3676	68.9403	57.9564
ENSG00000005486	RHBDD2	rhomboid domain containing 2 [Source:HGNC Symbol;Acc:HGNC:23082]	97.1866	14.6278	6.71549	15.3698
ENSG00000170889	RPS9	ribosomal protein S9 [Source:HGNC Symbol;Acc:HGNC:10442]	97.0148	152.596	296.563	266.747
ENSG00000156515	HK1	hexokinase 1 [Source:HGNC Symbol;Acc:HGNC:4922]	97.0062	109.953	56.8024	83.558
ENSG00000276293	PIP4K2B	phosphatidylinositol-5-phosphate 4-kinase, type II, beta [Source:HGNC Symbol;Acc:HGNC:8998]	96.9275	76.5801	59.7071	53.1968
ENSG00000057757	PITHD1	PITH (C-terminal proteasome-interacting domain of thioredoxin-like) domain containing 1 [Source:HGNC Symbol;Acc:HGNC:25022]	96.7648	26.3849	19.3645	23.4649
ENSG00000100650	SRSF5	serine/arginine-rich splicing factor 5 [Source:HGNC Symbol;Acc:HGNC:10787]	96.3901	66.8873	81.3437	64.0892
ENSG00000254999	BRK1	BRICK1, SCAR/WAVE actin-nucleating complex subunit [Source:HGNC Symbol;Acc:HGNC:23057]	95.807	110.669	89.5257	83.98
ENSG00000196419	XRCC6	X-ray repair complementing defective repair in Chinese hamster cells 6 [Source:HGNC Symbol;Acc:HGNC:4055]	95.7199	4.24355	9.11316	7.6228
ENSG00000155368	DBI	diazepam binding inhibitor (GABA receptor modulator, acyl-CoA binding protein) [Source:HGNC Symbol;Acc:HGNC:2690]	95.427	199.617	386.47	366.507
ENSG00000184602	SNN	stannin [Source:HGNC Symbol;Acc:HGNC:11149]	95.3199	87.2116	101.475	57.5346
ENSG00000104695	PPP2CB	protein phosphatase 2, catalytic subunit, beta isozyme [Source:HGNC Symbol;Acc:HGNC:9300]	95.2494	81.7916	71.0566	66.9033
ENSG00000108947	EFNB3	ephrin-B3 [Source:HGNC Symbol;Acc:HGNC:3228]	95.2237	87.4127	39.5949	63.7719
ENSG00000054793	ATP9A	ATPase, class II, type 9A [Source:HGNC Symbol;Acc:HGNC:13540]	94.9738	166.827	151.272	122.955
ENSG00000176871	WSB2	WD repeat and SOCS box containing 2 [Source:HGNC Symbol;Acc:HGNC:19222]	94.9439	132.778	72.301	63.1513
ENSG00000175203	DCTN2	dynactin 2 (p50) [Source:HGNC Symbol;Acc:HGNC:2712]	94.3668	173.719	126.44	132.815
ENSG00000215021	PHB2	prohibitin 2 [Source:HGNC Symbol;Acc:HGNC:30306]	94.3477	43.9352	39.2123	44.5686
ENSG00000110958	PTGES3	prostaglandin E synthase 3 (cytosolic) [Source:HGNC Symbol;Acc:HGNC:16049]	93.8527	37.8189	100.719	51.6297
ENSG00000044574	HSPA5	heat shock 70kDa protein 5 (glucose-regulated protein, 78kDa) [Source:HGNC Symbol;Acc:HGNC:5238]	93.8071	88.1029	94.5019	166.206
ENSG00000068615	REEP1	receptor accessory protein 1 [Source:HGNC Symbol;Acc:HGNC:25786]	93.6423	122.017	95.7785	101.713
ENSG00000019505	SYT13	synaptotagmin XIII [Source:HGNC Symbol;Acc:HGNC:14962]	92.9488	15.7448	3.37362	31.8377
ENSG00000132341	RAN	RAN, member RAS oncogene family [Source:HGNC Symbol;Acc:HGNC:9846]	92.5837	71.3566	91.5221	68.3299
ENSG00000132563	REEP2	receptor accessory protein 2 [Source:HGNC Symbol;Acc:HGNC:17975]	92.4871	70.3448	36.7225	40.9928
ENSG00000164919	COX6C	cytochrome c oxidase subunit VIc [Source:HGNC Symbol;Acc:HGNC:2285]	92.3987	45.0269	41.2154	30.9585
ENSG00000125534	PPDPF	pancreatic progenitor cell differentiation and proliferation factor [Source:HGNC Symbol;Acc:HGNC:16142]	92.3523	50.2217	38.0524	32.281
ENSG00000245910	SNHG6	small nucleolar RNA host gene 6 [Source:HGNC Symbol;Acc:HGNC:32965]	92.2511	20.6309	21.351	13.9302
ENSG00000070756	PABPC1	poly(A) binding protein, cytoplasmic 1 [Source:HGNC Symbol;Acc:HGNC:8554]	92.082	102.841	68.2945	153.994
ENSG00000100632	ERH	enhancer of rudimentary homolog (Drosophila) [Source:HGNC Symbol;Acc:HGNC:3447]	91.9624	48.1237	65.3702	42.6964
ENSG00000187189	TSPYL4	TSPY-like 4 [Source:HGNC Symbol;Acc:HGNC:21559]	91.8446	72.246	58.7931	94.7363
ENSG00000129351	ILF3	interleukin enhancer binding factor 3, 90kDa [Source:HGNC Symbol;Acc:HGNC:6038]	91.5294	37.9251	63.0275	44.7961
ENSG00000067560	RHOA	ras homolog family member A [Source:HGNC Symbol;Acc:HGNC:667]	91.4641	26.3309	21.4944	38.874
ENSG00000156261	CCT8	chaperonin containing TCP1, subunit 8 (theta) [Source:HGNC Symbol;Acc:HGNC:1623]	91.4399	99.1834	120.797	115.833
ENSG00000143862	ARL8A	ADP-ribosylation factor-like 8A [Source:HGNC Symbol;Acc:HGNC:25192]	91.3426	260.463	97.5355	151.037
ENSG00000052802	MSMO1	methylsterol monooxygenase 1 [Source:HGNC Symbol;Acc:HGNC:10545]	91.1721	66.5569	46.0334	42.9867
ENSG00000171130	ATP6V0E2	ATPase, H+ transporting V0 subunit e2 [Source:HGNC Symbol;Acc:HGNC:21723]	91.0827	199.563	98.3681	144.245
ENSG00000090097	PCBP4	poly(rC) binding protein 4 [Source:HGNC Symbol;Acc:HGNC:8652]	90.8004	132.138	109.917	85.2569
ENSG00000167792	NDUFV1	NADH dehydrogenase (ubiquinone) flavoprotein 1, 51kDa [Source:HGNC Symbol;Acc:HGNC:7716]	90.7558	72.6445	67.2325	61.5911
ENSG00000031698	SARS	seryl-tRNA synthetase [Source:HGNC Symbol;Acc:HGNC:10537]	90.6388	55.0283	56.5025	59.5429
ENSG00000116251	RPL22	ribosomal protein L22 [Source:HGNC Symbol;Acc:HGNC:10315]	90.5555	76.4467	130.645	77.3018
ENSG00000172137	CALB2	calbindin 2 [Source:HGNC Symbol;Acc:HGNC:1435]	90.5179	31.7896	21.9078	59.2062
ENSG00000152583	SPARCL1	SPARC-like 1 (hevin) [Source:HGNC Symbol;Acc:HGNC:11220]	90.3126	173.661	106.834	387.628
ENSG00000143612	C1orf43	chromosome 1 open reading frame 43 [Source:HGNC Symbol;Acc:HGNC:29876]	90.1228	14.6193	23.8423	21.0319
ENSG00000102317	RBM3	RNA binding motif (RNP1, RRM) protein 3 [Source:HGNC Symbol;Acc:HGNC:9900]	90.1111	32.441	60.0061	46.1831
ENSG00000125743	SNRPD2	small nuclear ribonucleoprotein D2 polypeptide 16.5kDa [Source:HGNC Symbol;Acc:HGNC:11159]	90.0408	104.124	108.937	64.3156
ENSG00000168036	CTNNB1	catenin (cadherin-associated protein), beta 1, 88kDa [Source:HGNC Symbol;Acc:HGNC:2514]	90.021	180.577	283.84	224.136
ENSG00000108518	PFN1	profilin 1 [Source:HGNC Symbol;Acc:HGNC:8881]	89.8552	76.6394	61.3164	88.5288
ENSG00000168268	NT5DC2	5'-nucleotidase domain containing 2 [Source:HGNC Symbol;Acc:HGNC:25717]	89.83	9.83375	33.7635	65.5852
ENSG00000146731	CCT6A	chaperonin containing TCP1, subunit 6A (zeta 1) [Source:HGNC Symbol;Acc:HGNC:1620]	89.7619	116.505	158.191	112.913
ENSG00000131409	LRRC4B	leucine rich repeat containing 4B [Source:HGNC Symbol;Acc:HGNC:25042]	89.7018	98.8443	82.8358	50.9325
ENSG00000197451	HNRNPAB	heterogeneous nuclear ribonucleoprotein A/B [Source:HGNC Symbol;Acc:HGNC:5034]	89.4636	113.153	107.715	82.4001
ENSG00000182220	ATP6AP2	ATPase, H+ transporting, lysosomal accessory protein 2 [Source:HGNC Symbol;Acc:HGNC:18305]	89.2752	111.407	61.1731	87.5494
ENSG00000007168	PAFAH1B1	platelet-activating factor acetylhydrolase 1b, regulatory subunit 1 (45kDa) [Source:HGNC Symbol;Acc:HGNC:8574]	88.9459	99.3148	92.7513	78.6591
ENSG00000088247	KHSRP	KH-type splicing regulatory protein [Source:HGNC Symbol;Acc:HGNC:6316]	88.7793	23.5322	27.1648	23.3313
ENSG00000105193	RPS16	ribosomal protein S16 [Source:HGNC Symbol;Acc:HGNC:10396]	88.4609	182.003	230.943	263.086
ENSG00000166780	C16orf45	chromosome 16 open reading frame 45 [Source:HGNC Symbol;Acc:HGNC:19213]	88.3939	102.905	59.3365	58.4924
ENSG00000113013	HSPA9	heat shock 70kDa protein 9 (mortalin) [Source:HGNC Symbol;Acc:HGNC:5244]	88.2979	79.339	97.8602	130.247
ENSG00000072778	ACADVL	acyl-CoA dehydrogenase, very long chain [Source:HGNC Symbol;Acc:HGNC:92]	88.2384	10.2602	13.0788	14.5907
ENSG00000164754	RAD21	RAD21 cohesin complex component [Source:HGNC Symbol;Acc:HGNC:9811]	88.174	38.5428	50.6114	74.5027
ENSG00000125691	RPL23	ribosomal protein L23 [Source:HGNC Symbol;Acc:HGNC:10316]	88.1699	144.832	356.875	332.052
ENSG00000184613	NELL2	neural EGFL like 2 [Source:HGNC Symbol;Acc:HGNC:7751]	88.1052	236.683	160.645	44.2521
ENSG00000105088	OLFM2	olfactomedin 2 [Source:HGNC Symbol;Acc:HGNC:17189]	88.0669	154.713	58.794	90.5727
ENSG00000163041	H3F3A	H3 histone, family 3A [Source:HGNC Symbol;Acc:HGNC:4764]	87.9293	35.4104	95.061	55.5772
ENSG00000127616	SMARCA4	SWI/SNF related, matrix associated, actin dependent regulator of chromatin, subfamily a, member 4 [Source:HGNC Symbol;Acc:HGNC:11100]	87.9054	42.2028	68.9312	46.8267
ENSG00000099956	SMARCB1	SWI/SNF related, matrix associated, actin dependent regulator of chromatin, subfamily b, member 1 [Source:HGNC Symbol;Acc:HGNC:11103]	87.7674	10.9584	15.785	14.0188
ENSG00000099795	NDUFB7	NADH dehydrogenase (ubiquinone) 1 beta subcomplex, 7, 18kDa [Source:HGNC Symbol;Acc:HGNC:7702]	87.5041	9.47997	10.2744	7.25392
ENSG00000168906	MAT2A	methionine adenosyltransferase II, alpha [Source:HGNC Symbol;Acc:HGNC:6904]	87.4787	69.3985	64.7118	83.1689
ENSG00000108946	PRKAR1A	protein kinase, cAMP-dependent, regulatory, type I, alpha [Source:HGNC Symbol;Acc:HGNC:9388]	87.4389	168.759	115.856	148.438
ENSG00000164434	FABP7	fatty acid binding protein 7, brain [Source:HGNC Symbol;Acc:HGNC:3562]	87.1845	413.914	1295.2	630.943
ENSG00000204463	BAG6	BCL2-associated athanogene 6 [Source:HGNC Symbol;Acc:HGNC:13919]	87.1018	75.9245	75.241	68.6277
ENSG00000113161	HMGCR	3-hydroxy-3-methylglutaryl-CoA reductase [Source:HGNC Symbol;Acc:HGNC:5006]	86.7139	118.438	114.178	73.6534
ENSG00000135052	GOLM1	golgi membrane protein 1 [Source:HGNC Symbol;Acc:HGNC:15451]	86.6614	9.85029	18.7441	19.3681
ENSG00000160469	BRSK1	BR serine/threonine kinase 1 [Source:HGNC Symbol;Acc:HGNC:18994]	86.6492	86.0841	39.3034	45.132
ENSG00000126950	TMEM35	transmembrane protein 35 [Source:HGNC Symbol;Acc:HGNC:25864]	86.5573	90.8413	71.3654	52.8817
ENSG00000174684	B4GAT1	beta-1,4-glucuronyltransferase 1 [Source:HGNC Symbol;Acc:HGNC:15685]	86.5118	40.1047	21.9722	42.0517
ENSG00000105058	FAM32A	family with sequence similarity 32, member A [Source:HGNC Symbol;Acc:HGNC:24563]	86.4749	56.635	71.1824	50.5147
ENSG00000058262	SEC61A1	Sec61 alpha 1 subunit (S. cerevisiae) [Source:HGNC Symbol;Acc:HGNC:18276]	86.437	45.9019	42.8321	71.842
ENSG00000129562	DAD1	defender against cell death 1 [Source:HGNC Symbol;Acc:HGNC:2664]	86.404	17.3227	11.9619	15.5949
ENSG00000148053	NTRK2	neurotrophic tyrosine kinase, receptor, type 2 [Source:HGNC Symbol;Acc:HGNC:8032]	86.1621	88.2897	65.3938	68.2429
ENSG00000105254	TBCB	tubulin folding cofactor B [Source:HGNC Symbol;Acc:HGNC:1989]	86.0928	64.5676	60.2544	45.5842
ENSG00000075461	CACNG4	calcium channel, voltage-dependent, gamma subunit 4 [Source:HGNC Symbol;Acc:HGNC:1408]	86.0543	56.7405	34.1553	57.9418
ENSG00000006118	TMEM132A	transmembrane protein 132A [Source:HGNC Symbol;Acc:HGNC:31092]	85.9126	61.8177	46.5396	37.164
ENSG00000152234	ATP5A1	ATP synthase, H+ transporting, mitochondrial F1 complex, alpha subunit 1, cardiac muscle [Source:HGNC Symbol;Acc:HGNC:823]	85.8458	374.545	317.345	320.093
ENSG00000099341	PSMD8	proteasome (prosome, macropain) 26S subunit, non-ATPase, 8 [Source:HGNC Symbol;Acc:HGNC:9566]	85.7275	78.8717	83.8758	75.1643
ENSG00000082014	SMARCD3	SWI/SNF related, matrix associated, actin dependent regulator of chromatin, subfamily d, member 3 [Source:HGNC Symbol;Acc:HGNC:11108]	85.721	15.1446	13.4005	10.6174
ENSG00000122705	CLTA	clathrin, light chain A [Source:HGNC Symbol;Acc:HGNC:2090]	85.5988	135.608	95.5711	100.84
ENSG00000106723	SPIN1	spindlin 1 [Source:HGNC Symbol;Acc:HGNC:11243]	85.5983	58.1793	77.3809	67.2876
ENSG00000165678	GHITM	growth hormone inducible transmembrane protein [Source:HGNC Symbol;Acc:HGNC:17281]	85.5415	79.2022	44.35	76.2321
ENSG00000170043	TRAPPC1	trafficking protein particle complex 1 [Source:HGNC Symbol;Acc:HGNC:19894]	85.5025	38.3402	43.0199	54.4995
ENSG00000111229	ARPC3	actin related protein 2/3 complex, subunit 3, 21kDa [Source:HGNC Symbol;Acc:HGNC:706]	85.4589	157.504	137.913	83.7459
ENSG00000077097	TOP2B	topoisomerase (DNA) II beta 180kDa [Source:HGNC Symbol;Acc:HGNC:11990]	85.4371	48.2812	115.264	53.3884
ENSG00000132688	NES	nestin [Source:HGNC Symbol;Acc:HGNC:7756]	85.4012	5.20249	34.8802	16.5526
ENSG00000104897	SF3A2	splicing factor 3a, subunit 2, 66kDa [Source:HGNC Symbol;Acc:HGNC:10766]	85.2137	18.9561	10.568	20.0064
ENSG00000167526	RPL13	ribosomal protein L13 [Source:HGNC Symbol;Acc:HGNC:10303]	85.1949	92.2434	136.634	107.733
ENSG00000099864	PALM	paralemmin [Source:HGNC Symbol;Acc:HGNC:8594]	85.1289	155.407	87.8472	70.6272
ENSG00000126457	PRMT1	protein arginine methyltransferase 1 [Source:HGNC Symbol;Acc:HGNC:5187]	85.0755	77.4279	57.5304	84.9505
ENSG00000079246	XRCC5	X-ray repair complementing defective repair in Chinese hamster cells 5 (double-strand-break rejoining) [Source:HGNC Symbol;Acc:HGNC:12833]	84.7385	3.62529	7.79171	7.28353
ENSG00000118705	RPN2	ribophorin II [Source:HGNC Symbol;Acc:HGNC:10382]	84.402	55.3171	58.2633	101.438
ENSG00000167468	GPX4	glutathione peroxidase 4 [Source:HGNC Symbol;Acc:HGNC:4556]	84.3941	110.901	80.0241	84.0034
ENSG00000196683	TOMM7	translocase of outer mitochondrial membrane 7 homolog (yeast) [Source:HGNC Symbol;Acc:HGNC:21648]	84.394	32.0367	41.2574	26.3027
ENSG00000124785	NRN1	neuritin 1 [Source:HGNC Symbol;Acc:HGNC:17972]	84.3219	22.6694	9.66932	65.5031
ENSG00000105605	CACNG7	calcium channel, voltage-dependent, gamma subunit 7 [Source:HGNC Symbol;Acc:HGNC:13626]	84.2881	67.7621	19.1619	38.6546
ENSG00000108175	ZMIZ1	zinc finger, MIZ-type containing 1 [Source:HGNC Symbol;Acc:HGNC:16493]	84.2835	29.0225	10.565	44.3205
ENSG00000104904	OAZ1	ornithine decarboxylase antizyme 1 [Source:HGNC Symbol;Acc:HGNC:8095]	84.2107	49.4401	53.8761	31.9122
ENSG00000144485	HES6	hes family bHLH transcription factor 6 [Source:HGNC Symbol;Acc:HGNC:18254]	84.1501	31.7395	36.2953	20.3846
ENSG00000142168	SOD1	superoxide dismutase 1, soluble [Source:HGNC Symbol;Acc:HGNC:11179]	84.101	236.372	209.812	221.279
ENSG00000114784	EIF1B	eukaryotic translation initiation factor 1B [Source:HGNC Symbol;Acc:HGNC:30792]	83.9023	128.364	176.01	68.1016
ENSG00000130638	ATXN10	ataxin 10 [Source:HGNC Symbol;Acc:HGNC:10549]	83.6798	157.689	116.703	165.887
ENSG00000099284	H2AFY2	H2A histone family, member Y2 [Source:HGNC Symbol;Acc:HGNC:14453]	83.6705	33.5185	55.5975	47.8581
ENSG00000204681	GABBR1	gamma-aminobutyric acid (GABA) B receptor, 1 [Source:HGNC Symbol;Acc:HGNC:4070]	83.4437	116.141	70.2219	92.798
ENSG00000122756	CNTFR	ciliary neurotrophic factor receptor [Source:HGNC Symbol;Acc:HGNC:2170]	83.4229	28.5698	13.5861	32.5171
ENSG00000115963	RND3	Rho family GTPase 3 [Source:HGNC Symbol;Acc:HGNC:671]	83.2508	12.3378	36.9895	38.9605
ENSG00000174460	ZCCHC12	zinc finger, CCHC domain containing 12 [Source:HGNC Symbol;Acc:HGNC:27273]	82.9699	58.236	40.8991	118.883
ENSG00000171867	PRNP	prion protein [Source:HGNC Symbol;Acc:HGNC:9449]	82.7615	155.935	173.32	88.9753
ENSG00000131116	ZNF428	zinc finger protein 428 [Source:HGNC Symbol;Acc:HGNC:20804]	82.5763	51.9786	37.7233	31.4649
ENSG00000175582	RAB6A	RAB6A, member RAS oncogene family [Source:HGNC Symbol;Acc:HGNC:9786]	82.5257	156.393	89.4465	126.72
ENSG00000163466	ARPC2	actin related protein 2/3 complex, subunit 2, 34kDa [Source:HGNC Symbol;Acc:HGNC:705]	82.4923	195.159	125.911	125.971
ENSG00000163902	RPN1	ribophorin I [Source:HGNC Symbol;Acc:HGNC:10381]	82.4845	49.5922	42.9644	64.9455
ENSG00000169714	CNBP	CCHC-type zinc finger, nucleic acid binding protein [Source:HGNC Symbol;Acc:HGNC:13164]	82.4257	101.27	103.393	100.92
ENSG00000165802	NSMF	NMDA receptor synaptonuclear signaling and neuronal migration factor [Source:HGNC Symbol;Acc:HGNC:29843]	82.4078	187.433	80.722	36.8647
ENSG00000182093	WRB	tryptophan rich basic protein [Source:HGNC Symbol;Acc:HGNC:12790]	82.3385	34.1236	45.5613	30.0259
ENSG00000156298	TSPAN7	tetraspanin 7 [Source:HGNC Symbol;Acc:HGNC:11854]	82.3219	63.2811	36.7114	43.0024
ENSG00000159352	PSMD4	proteasome (prosome, macropain) 26S subunit, non-ATPase, 4 [Source:HGNC Symbol;Acc:HGNC:9561]	82.2721	45.9438	53.917	48.0291
ENSG00000100823	APEX1	APEX nuclease (multifunctional DNA repair enzyme) 1 [Source:HGNC Symbol;Acc:HGNC:587]	82.259	14.2346	17.6009	11.3436
ENSG00000091664	SLC17A6	solute carrier family 17 (vesicular glutamate transporter), member 6 [Source:HGNC Symbol;Acc:HGNC:16703]	82.1601	14.7688	12.2949	93.9758
ENSG00000161970	RPL26	ribosomal protein L26 [Source:HGNC Symbol;Acc:HGNC:10327]	82.0847	62.4001	161.721	337.504
ENSG00000170004	CHD3	chromodomain helicase DNA binding protein 3 [Source:HGNC Symbol;Acc:HGNC:1918]	81.7629	109.997	131.244	75.7866
ENSG00000153187	HNRNPU	heterogeneous nuclear ribonucleoprotein U (scaffold attachment factor A) [Source:HGNC Symbol;Acc:HGNC:5048]	81.5012	20.5317	26.8454	19.8404
ENSG00000105401	CDC37	cell division cycle 37 [Source:HGNC Symbol;Acc:HGNC:1735]	81.4143	53.1156	36.1867	47.9583
ENSG00000168066	SF1	splicing factor 1 [Source:HGNC Symbol;Acc:HGNC:12950]	81.3136	43.9029	25.6666	40.5903
ENSG00000063660	GPC1	glypican 1 [Source:HGNC Symbol;Acc:HGNC:4449]	81.2868	36.2439	40.9019	33.1797
ENSG00000228474	OST4	oligosaccharyltransferase complex subunit 4 (non-catalytic) [Source:HGNC Symbol;Acc:HGNC:32483]	81.2596	16.4024	12.623	22.1825
ENSG00000125971	DYNLRB1	dynein, light chain, roadblock-type 1 [Source:HGNC Symbol;Acc:HGNC:15468]	81.2205	191.278	137.472	139.613
ENSG00000277586	NEFL	neurofilament, light polypeptide [Source:HGNC Symbol;Acc:HGNC:7739]	81.1786	43.2403	17.2578	133.571
ENSG00000137343	ATAT1	alpha tubulin acetyltransferase 1 [Source:HGNC Symbol;Acc:HGNC:21186]	81.1761	97.5214	51.1003	67.6948
ENSG00000169750	RAC3	ras-related C3 botulinum toxin substrate 3 (rho family, small GTP binding protein Rac3) [Source:HGNC Symbol;Acc:HGNC:9803]	81.1288	191.098	112.763	116.171
ENSG00000169992	NLGN2	neuroligin 2 [Source:HGNC Symbol;Acc:HGNC:14290]	81.1126	82.4889	24.0298	59.2522
ENSG00000130287	NCAN	neurocan [Source:HGNC Symbol;Acc:HGNC:2465]	81.1056	77.5762	155.623	54.7019
ENSG00000077080	ACTL6B	actin-like 6B [Source:HGNC Symbol;Acc:HGNC:160]	81.0952	39.467	30.8299	16.391
ENSG00000084207	GSTP1	glutathione S-transferase pi 1 [Source:HGNC Symbol;Acc:HGNC:4638]	81.035	108.414	105.043	61.3113
ENSG00000143256	PFDN2	prefoldin subunit 2 [Source:HGNC Symbol;Acc:HGNC:8867]	80.876	23.8811	9.92698	22.3514
ENSG00000130522	JUND	jun D proto-oncogene [Source:HGNC Symbol;Acc:HGNC:6206]	80.8381	38.5109	12.5697	20.3422
ENSG00000169783	LINGO1	leucine rich repeat and Ig domain containing 1 [Source:HGNC Symbol;Acc:HGNC:21205]	80.821	98.225	22.6055	37.2791
ENSG00000068745	IP6K2	inositol hexakisphosphate kinase 2 [Source:HGNC Symbol;Acc:HGNC:17313]	80.8134	51.0627	48.2483	40.1179
ENSG00000165637	VDAC2	voltage-dependent anion channel 2 [Source:HGNC Symbol;Acc:HGNC:12672]	80.5084	93.7412	80.5738	92.2295
ENSG00000137942	FNBP1L	formin binding protein 1-like [Source:HGNC Symbol;Acc:HGNC:20851]	80.4541	79.7148	68.6437	57.1191
ENSG00000104765	BNIP3L	BCL2/adenovirus E1B 19kDa interacting protein 3-like [Source:HGNC Symbol;Acc:HGNC:1085]	80.3778	52.0512	48.2328	43.4911
ENSG00000155980	KIF5A	kinesin family member 5A [Source:HGNC Symbol;Acc:HGNC:6323]	80.3178	169.122	72.7747	90.2545
ENSG00000167654	ATCAY	ataxia, cerebellar, Cayman type [Source:HGNC Symbol;Acc:HGNC:779]	80.2532	95.8001	73.1396	48.427
ENSG00000143153	ATP1B1	ATPase, Na+/K+ transporting, beta 1 polypeptide [Source:HGNC Symbol;Acc:HGNC:804]	80.0879	481.826	109.28	204.081
ENSG00000164405	UQCRQ	ubiquinol-cytochrome c reductase, complex III subunit VII, 9.5kDa [Source:HGNC Symbol;Acc:HGNC:29594]	79.8746	71.4981	24.9602	30.9177
ENSG00000105323	HNRNPUL1	heterogeneous nuclear ribonucleoprotein U-like 1 [Source:HGNC Symbol;Acc:HGNC:17011]	79.8202	37.6782	55.6233	44.3675
ENSG00000170558	CDH2	cadherin 2, type 1, N-cadherin (neuronal) [Source:HGNC Symbol;Acc:HGNC:1759]	79.7657	45.1669	91.1463	39.5639
ENSG00000168913	ENHO	energy homeostasis associated [Source:HGNC Symbol;Acc:HGNC:24838]	79.7601	40.6155	30.9655	33.0208
ENSG00000187601	MAGEH1	melanoma antigen family H1 [Source:HGNC Symbol;Acc:HGNC:24092]	79.6891	27.0285	33.5456	34.3055
ENSG00000184702	2005-09-01	septin 5 [Source:HGNC Symbol;Acc:HGNC:9164]	79.4605	228.783	132.382	85.5609
ENSG00000141367	CLTC	clathrin, heavy chain (Hc) [Source:HGNC Symbol;Acc:HGNC:2092]	79.2328	107.884	114.236	126.414
ENSG00000171314	PGAM1	phosphoglycerate mutase 1 (brain) [Source:HGNC Symbol;Acc:HGNC:8888]	79.0586	109.26	36.1781	79.5825
ENSG00000179950	PUF60	poly-U binding splicing factor 60KDa [Source:HGNC Symbol;Acc:HGNC:17042]	79.0352	80.3012	89.5847	85.3576
ENSG00000146701	MDH2	malate dehydrogenase 2, NAD (mitochondrial) [Source:HGNC Symbol;Acc:HGNC:6971]	78.9582	201.15	91.4848	159.299
ENSG00000182809	CRIP2	cysteine-rich protein 2 [Source:HGNC Symbol;Acc:HGNC:2361]	78.7736	204.906	125.843	42.3275
ENSG00000166913	YWHAB	tyrosine 3-monooxygenase/tryptophan 5-monooxygenase activation protein, beta [Source:HGNC Symbol;Acc:HGNC:12849]	78.7273	262.656	101.561	218.435
ENSG00000010810	FYN	FYN proto-oncogene, Src family tyrosine kinase [Source:HGNC Symbol;Acc:HGNC:4037]	78.6433	79.0702	92.4423	53.9375
ENSG00000155876	RRAGA	Ras-related GTP binding A [Source:HGNC Symbol;Acc:HGNC:16963]	78.3574	92.464	31.0402	66.9757
ENSG00000105404	RABAC1	Rab acceptor 1 (prenylated) [Source:HGNC Symbol;Acc:HGNC:9794]	78.3426	134.372	58.2809	67.8468
ENSG00000196465	MYL6B	myosin, light chain 6B, alkali, smooth muscle and non-muscle [Source:HGNC Symbol;Acc:HGNC:29823]	78.2304	28.5748	12.1512	23.9755
ENSG00000173726	TOMM20	translocase of outer mitochondrial membrane 20 homolog (yeast) [Source:HGNC Symbol;Acc:HGNC:20947]	78.2023	45.9512	45.1411	43.1275
ENSG00000005249	PRKAR2B	protein kinase, cAMP-dependent, regulatory, type II, beta [Source:HGNC Symbol;Acc:HGNC:9392]	78.1682	98.7873	81.3055	55.2862
ENSG00000107281	NPDC1	neural proliferation, differentiation and control, 1 [Source:HGNC Symbol;Acc:HGNC:7899]	77.8149	197.231	87.9626	105.848
ENSG00000167978	SRRM2	serine/arginine repetitive matrix 2 [Source:HGNC Symbol;Acc:HGNC:16639]	77.5016	77.1824	38.0602	75.0773
ENSG00000137207	YIPF3	Yip1 domain family, member 3 [Source:HGNC Symbol;Acc:HGNC:21023]	77.2964	26.7539	9.04124	25.7801
ENSG00000174938	SEZ6L2	seizure related 6 homolog (mouse)-like 2 [Source:HGNC Symbol;Acc:HGNC:30844]	77.2632	70.2467	32.1147	56.0808
ENSG00000096746	HNRNPH3	heterogeneous nuclear ribonucleoprotein H3 (2H9) [Source:HGNC Symbol;Acc:HGNC:5043]	77.1211	16.6932	21.4312	21.9669
ENSG00000004059	ARF5	ADP-ribosylation factor 5 [Source:HGNC Symbol;Acc:HGNC:658]	76.9637	149.868	80.1511	78.0995
ENSG00000152102	FAM168B	family with sequence similarity 168, member B [Source:HGNC Symbol;Acc:HGNC:27016]	76.7583	94.6355	118.675	85.3031
ENSG00000063244	U2AF2	U2 small nuclear RNA auxiliary factor 2 [Source:HGNC Symbol;Acc:HGNC:23156]	76.7404	58.3329	81.8309	69.8329
ENSG00000204256	BRD2	bromodomain containing 2 [Source:HGNC Symbol;Acc:HGNC:1103]	76.651	88.1547	70.8143	64.5358
ENSG00000102804	TSC22D1	TSC22 domain family, member 1 [Source:HGNC Symbol;Acc:HGNC:16826]	76.5843	106.908	104.989	98.5828
ENSG00000142507	PSMB6	proteasome (prosome, macropain) subunit, beta type, 6 [Source:HGNC Symbol;Acc:HGNC:9543]	76.5731	101.965	140.418	116.225
ENSG00000270647	TAF15	TAF15 RNA polymerase II, TATA box binding protein (TBP)-associated factor, 68kDa [Source:HGNC Symbol;Acc:HGNC:11547]	76.474	35.5025	9.04218	44.1647
ENSG00000163539	CLASP2	cytoplasmic linker associated protein 2 [Source:HGNC Symbol;Acc:HGNC:17078]	76.4416	67.4756	99.6868	63.7121
ENSG00000173915	USMG5	up-regulated during skeletal muscle growth 5 homolog (mouse) [Source:HGNC Symbol;Acc:HGNC:30889]	76.2111	232.04	288.222	168.577
ENSG00000124702	KLHDC3	kelch domain containing 3 [Source:HGNC Symbol;Acc:HGNC:20704]	76.1765	81.5039	35.5032	59.9178
ENSG00000117519	CNN3	calponin 3, acidic [Source:HGNC Symbol;Acc:HGNC:2157]	76.0905	64.2982	117.971	127.055
ENSG00000162188	GNG3	guanine nucleotide binding protein (G protein), gamma 3 [Source:HGNC Symbol;Acc:HGNC:4405]	75.9403	166.418	66.5628	123.343
ENSG00000074696	HACD3	3-hydroxyacyl-CoA dehydratase 3 [Source:HGNC Symbol;Acc:HGNC:24175]	75.8301	67.2636	79.8758	74.2522
ENSG00000174437	ATP2A2	ATPase, Ca++ transporting, cardiac muscle, slow twitch 2 [Source:HGNC Symbol;Acc:HGNC:812]	75.7505	128.215	75.474	95.0148
ENSG00000178498	DTX3	deltex 3, E3 ubiquitin ligase [Source:HGNC Symbol;Acc:HGNC:24457]	75.669	103.847	73.9419	97.6789
ENSG00000106367	AP1S1	adaptor-related protein complex 1, sigma 1 subunit [Source:HGNC Symbol;Acc:HGNC:559]	75.6569	113.681	40.2037	75.6659
ENSG00000189043	NDUFA4	NDUFA4, mitochondrial complex associated [Source:HGNC Symbol;Acc:HGNC:7687]	75.6389	138.097	140.088	85.5963
ENSG00000120265	PCMT1	protein-L-isoaspartate (D-aspartate) O-methyltransferase [Source:HGNC Symbol;Acc:HGNC:8728]	75.4469	39.8496	28.0103	32.9478
ENSG00000155096	AZIN1	antizyme inhibitor 1 [Source:HGNC Symbol;Acc:HGNC:16432]	75.4044	85.874	75.3768	57.3561
ENSG00000132670	PTPRA	protein tyrosine phosphatase, receptor type, A [Source:HGNC Symbol;Acc:HGNC:9664]	75.2484	77.5411	63.1359	48.6204
ENSG00000126698	DNAJC8	DnaJ (Hsp40) homolog, subfamily C, member 8 [Source:HGNC Symbol;Acc:HGNC:15470]	74.8245	37.188	40.7918	45.2686
ENSG00000157514	TSC22D3	TSC22 domain family, member 3 [Source:HGNC Symbol;Acc:HGNC:3051]	74.7253	6.82754	7.78464	14.1488
ENSG00000077380	DYNC1I2	dynein, cytoplasmic 1, intermediate chain 2 [Source:HGNC Symbol;Acc:HGNC:2964]	74.6181	61.5461	73.0576	54.5889
ENSG00000004487	KDM1A	lysine (K)-specific demethylase 1A [Source:HGNC Symbol;Acc:HGNC:29079]	74.5861	55.5512	95.3736	50.7551
ENSG00000131100	ATP6V1E1	ATPase, H+ transporting, lysosomal 31kDa, V1 subunit E1 [Source:HGNC Symbol;Acc:HGNC:857]	74.525	81.4445	54.058	58.3441
ENSG00000139182	CLSTN3	calsyntenin 3 [Source:HGNC Symbol;Acc:HGNC:18371]	74.4742	92.5992	40.1633	69.5723
ENSG00000104969	SGTA	small glutamine-rich tetratricopeptide repeat (TPR)-containing, alpha [Source:HGNC Symbol;Acc:HGNC:10819]	74.4441	92.5151	60.1425	77.4737
ENSG00000135829	DHX9	DEAH (Asp-Glu-Ala-His) box helicase 9 [Source:HGNC Symbol;Acc:HGNC:2750]	74.3662	60.0749	29.6526	71.2801
ENSG00000089199	CHGB	chromogranin B [Source:HGNC Symbol;Acc:HGNC:1930]	74.3501	72.3814	28.6362	59.1017
ENSG00000087258	GNAO1	guanine nucleotide binding protein (G protein), alpha activating activity polypeptide O [Source:HGNC Symbol;Acc:HGNC:4389]	74.3486	381.469	105.669	157.265
ENSG00000134333	LDHA	lactate dehydrogenase A [Source:HGNC Symbol;Acc:HGNC:6535]	74.0799	530.595	140.512	421.488
ENSG00000067715	SYT1	synaptotagmin I [Source:HGNC Symbol;Acc:HGNC:11509]	73.8764	214.157	74.746	58.1492
ENSG00000138107	ACTR1A	ARP1 actin-related protein 1 homolog A, centractin alpha (yeast) [Source:HGNC Symbol;Acc:HGNC:167]	73.7127	119.329	128.442	99.808
ENSG00000183044	ABAT	4-aminobutyrate aminotransferase [Source:HGNC Symbol;Acc:HGNC:23]	73.6082	31.8535	26.5112	37.5628
ENSG00000077549	CAPZB	capping protein (actin filament) muscle Z-line, beta [Source:HGNC Symbol;Acc:HGNC:1491]	73.5953	128.507	71.0375	121.696
ENSG00000175166	PSMD2	proteasome (prosome, macropain) 26S subunit, non-ATPase, 2 [Source:HGNC Symbol;Acc:HGNC:9559]	73.5752	98.4089	102.627	106.884
ENSG00000166974	MAPRE2	microtubule-associated protein, RP/EB family, member 2 [Source:HGNC Symbol;Acc:HGNC:6891]	73.5458	171.705	70.9667	86.7911
ENSG00000105887	MTPN	myotrophin [Source:HGNC Symbol;Acc:HGNC:15667]	73.5375	155.943	127.625	89.524
ENSG00000069849	ATP1B3	ATPase, Na+/K+ transporting, beta 3 polypeptide [Source:HGNC Symbol;Acc:HGNC:806]	73.4851	34.9856	30.6988	59.553
ENSG00000162613	FUBP1	far upstream element (FUSE) binding protein 1 [Source:HGNC Symbol;Acc:HGNC:4004]	73.4296	20.2249	47.0884	22.2882
ENSG00000121653	MAPK8IP1	mitogen-activated protein kinase 8 interacting protein 1 [Source:HGNC Symbol;Acc:HGNC:6882]	73.4209	153.963	85.9086	90.0209
ENSG00000153815	CMIP	c-Maf inducing protein [Source:HGNC Symbol;Acc:HGNC:24319]	73.3256	142.714	48.9366	73.1537
ENSG00000143727	ACP1	acid phosphatase 1, soluble [Source:HGNC Symbol;Acc:HGNC:122]	73.2633	5.67692	7.70112	6.26713
ENSG00000092199	HNRNPC	heterogeneous nuclear ribonucleoprotein C (C1/C2) [Source:HGNC Symbol;Acc:HGNC:5035]	73.2306	58.996	84.3277	71.927
ENSG00000105419	MEIS3	Meis homeobox 3 [Source:HGNC Symbol;Acc:HGNC:29537]	73.2291	21.9982	24.853	21.6857
ENSG00000110076	NRXN2	neurexin 2 [Source:HGNC Symbol;Acc:HGNC:8009]	73.0837	118.763	39.8112	55.2865
ENSG00000057608	GDI2	GDP dissociation inhibitor 2 [Source:HGNC Symbol;Acc:HGNC:4227]	72.9699	88.9986	140.821	151.938
ENSG00000138757	G3BP2	GTPase activating protein (SH3 domain) binding protein 2 [Source:HGNC Symbol;Acc:HGNC:30291]	72.8627	38.0881	45.0367	38.421
ENSG00000138760	SCARB2	scavenger receptor class B, member 2 [Source:HGNC Symbol;Acc:HGNC:1665]	72.7772	42.7739	69.1585	51.3093
ENSG00000141522	ARHGDIA	Rho GDP dissociation inhibitor (GDI) alpha [Source:HGNC Symbol;Acc:HGNC:678]	72.7752	202.238	89.7785	211.608
ENSG00000101421	CHMP4B	charged multivesicular body protein 4B [Source:HGNC Symbol;Acc:HGNC:16171]	72.618	110.112	72.0942	92.2791
ENSG00000196361	ELAVL3	ELAV like neuron-specific RNA binding protein 3 [Source:HGNC Symbol;Acc:HGNC:3314]	72.6164	110.673	89.2491	63.4033
ENSG00000164442	CITED2	Cbp/p300-interacting transactivator, with Glu/Asp-rich carboxy-terminal domain, 2 [Source:HGNC Symbol;Acc:HGNC:1987]	72.569	37.3184	12.5419	45.4568
ENSG00000113141	IK	IK cytokine, down-regulator of HLA II [Source:HGNC Symbol;Acc:HGNC:5958]	72.3699	46.7436	65.4788	65.4605
ENSG00000087365	SF3B2	splicing factor 3b, subunit 2, 145kDa [Source:HGNC Symbol;Acc:HGNC:10769]	72.342	76.416	102.984	88.6392
ENSG00000205531	NAP1L4	nucleosome assembly protein 1-like 4 [Source:HGNC Symbol;Acc:HGNC:7640]	72.0496	81.2676	93.892	83.76
ENSG00000198242	RPL23A	ribosomal protein L23a [Source:HGNC Symbol;Acc:HGNC:10317]	72.0239	133.742	310.28	217.815
ENSG00000104388	RAB2A	RAB2A, member RAS oncogene family [Source:HGNC Symbol;Acc:HGNC:9763]	71.8456	168.357	136.581	130.686
ENSG00000161682	FAM171A2	family with sequence similarity 171, member A2 [Source:HGNC Symbol;Acc:HGNC:30480]	71.6437	90.8789	59.9225	42.5679
ENSG00000166595	FAM96B	family with sequence similarity 96, member B [Source:HGNC Symbol;Acc:HGNC:24261]	71.5399	24.8485	25.2054	18.5341
ENSG00000112514	CUTA	cutA divalent cation tolerance homolog (E. coli) [Source:HGNC Symbol;Acc:HGNC:21101]	71.5204	48.5231	38.1642	43.9168
ENSG00000167986	DDB1	damage-specific DNA binding protein 1, 127kDa [Source:HGNC Symbol;Acc:HGNC:2717]	71.5104	76.9073	123.043	141.172
ENSG00000151640	DPYSL4	dihydropyrimidinase-like 4 [Source:HGNC Symbol;Acc:HGNC:3016]	71.4499	35.0544	29.5156	30.6599
ENSG00000198728	LDB1	LIM domain binding 1 [Source:HGNC Symbol;Acc:HGNC:6532]	71.397	42.9209	69.1616	57.3565
ENSG00000157216	SSBP3	single stranded DNA binding protein 3 [Source:HGNC Symbol;Acc:HGNC:15674]	71.3713	33.6681	44.8183	45.2954
ENSG00000165280	VCP	valosin containing protein [Source:HGNC Symbol;Acc:HGNC:12666]	71.2651	52.5969	76.9165	113.406
ENSG00000184117	NIPSNAP1	nipsnap homolog 1 (C. elegans) [Source:HGNC Symbol;Acc:HGNC:7827]	71.1893	47.4862	43.727	39.7608
ENSG00000175334	BANF1	barrier to autointegration factor 1 [Source:HGNC Symbol;Acc:HGNC:17397]	71.042	97.2852	79.7226	74.0501
ENSG00000164985	PSIP1	PC4 and SFRS1 interacting protein 1 [Source:HGNC Symbol;Acc:HGNC:9527]	70.929	93.7554	109.1	87.2044
ENSG00000114573	ATP6V1A	ATPase, H+ transporting, lysosomal 70kDa, V1 subunit A [Source:HGNC Symbol;Acc:HGNC:851]	70.8218	138.655	71.5819	88.9335
ENSG00000169045	HNRNPH1	heterogeneous nuclear ribonucleoprotein H1 (H) [Source:HGNC Symbol;Acc:HGNC:5041]	70.7634	73.93	138.19	94.5333
ENSG00000129355	CDKN2D	cyclin-dependent kinase inhibitor 2D (p19, inhibits CDK4) [Source:HGNC Symbol;Acc:HGNC:1790]	70.7565	58.9127	20.6075	29.3355
ENSG00000172809	RPL38	ribosomal protein L38 [Source:HGNC Symbol;Acc:HGNC:10349]	70.7383	219.434	424.755	202.98
ENSG00000107874	CUEDC2	CUE domain containing 2 [Source:HGNC Symbol;Acc:HGNC:28352]	70.5739	58.0342	42.7376	37.9033
ENSG00000137312	FLOT1	flotillin 1 [Source:HGNC Symbol;Acc:HGNC:3757]	70.5661	67.9226	30.6021	42.2634
ENSG00000004777	ARHGAP33	Rho GTPase activating protein 33 [Source:HGNC Symbol;Acc:HGNC:23085]	70.5376	113.461	25.5519	38.0951
ENSG00000117410	ATP6V0B	ATPase, H+ transporting, lysosomal 21kDa, V0 subunit b [Source:HGNC Symbol;Acc:HGNC:861]	70.5335	257.467	131.269	137.675
ENSG00000042753	AP2S1	adaptor-related protein complex 2, sigma 1 subunit [Source:HGNC Symbol;Acc:HGNC:565]	70.5202	161.899	104.408	88.6087
ENSG00000215301	DDX3X	DEAD (Asp-Glu-Ala-Asp) box helicase 3, X-linked [Source:HGNC Symbol;Acc:HGNC:2745]	70.502	67.2087	114.526	96.8347
ENSG00000005022	SLC25A5	solute carrier family 25 (mitochondrial carrier; adenine nucleotide translocator), member 5 [Source:HGNC Symbol;Acc:HGNC:10991]	70.4719	129.034	136.222	155.521
ENSG00000170142	UBE2E1	ubiquitin-conjugating enzyme E2E 1 [Source:HGNC Symbol;Acc:HGNC:12477]	70.3645	16.628	12.7647	15.2146
ENSG00000100591	AHSA1	AHA1, activator of heat shock 90kDa protein ATPase homolog 1 (yeast) [Source:HGNC Symbol;Acc:HGNC:1189]	70.302	72.5166	73.2456	68.9937
ENSG00000155959	VBP1	von Hippel-Lindau binding protein 1 [Source:HGNC Symbol;Acc:HGNC:12662]	70.2994	52.6593	62.9993	59.3082
ENSG00000221983	UBA52	ubiquitin A-52 residue ribosomal protein fusion product 1 [Source:HGNC Symbol;Acc:HGNC:12458]	70.2398	0.692362	0.435377	0.827867
ENSG00000214253	FIS1	fission, mitochondrial 1 [Source:HGNC Symbol;Acc:HGNC:21689]	70.2293	74.3389	78.4288	83.514
ENSG00000178252	WDR6	WD repeat domain 6 [Source:HGNC Symbol;Acc:HGNC:12758]	70.0627	114.065	105.866	135.684
ENSG00000069275	NUCKS1	nuclear casein kinase and cyclin-dependent kinase substrate 1 [Source:HGNC Symbol;Acc:HGNC:29923]	69.7989	29.8438	74.8154	30.9713
ENSG00000169976	SF3B5	splicing factor 3b, subunit 5, 10kDa [Source:HGNC Symbol;Acc:HGNC:21083]	69.7977	8.45048	5.80208	4.58621
ENSG00000104833	TUBB4A	tubulin, beta 4A class IVa [Source:HGNC Symbol;Acc:HGNC:20774]	69.7972	210.921	36.3843	85.9825
ENSG00000182916	TCEAL7	transcription elongation factor A (SII)-like 7 [Source:HGNC Symbol;Acc:HGNC:28336]	69.7384	2.04516	1.2452	1.65179
ENSG00000128739	SNRPN	small nuclear ribonucleoprotein polypeptide N [Source:HGNC Symbol;Acc:HGNC:11164]	69.7089	213.097	84.0977	180.739
ENSG00000143878	RHOB	ras homolog family member B [Source:HGNC Symbol;Acc:HGNC:668]	69.6958	102.058	60.2626	49.5463
ENSG00000123091	RNF11	ring finger protein 11 [Source:HGNC Symbol;Acc:HGNC:10056]	69.5637	66.766	43.8367	43.7481
ENSG00000241468	ATP5J2	ATP synthase, H+ transporting, mitochondrial Fo complex, subunit F2 [Source:HGNC Symbol;Acc:HGNC:848]	69.5457	43.7107	44.2583	36.2913
ENSG00000088367	EPB41L1	erythrocyte membrane protein band 4.1-like 1 [Source:HGNC Symbol;Acc:HGNC:3378]	69.511	76.4155	48.3712	50.7789
ENSG00000169564	PCBP1	poly(rC) binding protein 1 [Source:HGNC Symbol;Acc:HGNC:8647]	69.418	92.359	26.9149	85.499
ENSG00000130175	PRKCSH	protein kinase C substrate 80K-H [Source:HGNC Symbol;Acc:HGNC:9411]	69.3692	46.0952	47.8081	68.3588
ENSG00000182087	TMEM259	transmembrane protein 259 [Source:HGNC Symbol;Acc:HGNC:17039]	69.3388	43.5733	21.3621	27.5514
ENSG00000171724	VAT1L	vesicle amine transport 1-like [Source:HGNC Symbol;Acc:HGNC:29315]	69.3188	15.3084	17.7486	44.443
ENSG00000134824	FADS2	fatty acid desaturase 2 [Source:HGNC Symbol;Acc:HGNC:3575]	69.2246	173.575	165.314	214.546
ENSG00000116729	WLS	wntless Wnt ligand secretion mediator [Source:HGNC Symbol;Acc:HGNC:30238]	69.0485	8.75168	12.8418	66.4972
ENSG00000109475	RPL34	ribosomal protein L34 [Source:HGNC Symbol;Acc:HGNC:10340]	69.0352	38.4208	82.6882	62.8705
ENSG00000100380	ST13	suppression of tumorigenicity 13 (colon carcinoma) (Hsp70 interacting protein) [Source:HGNC Symbol;Acc:HGNC:11343]	68.8863	61.2297	84.4793	75.2209
ENSG00000204469	PRRC2A	proline-rich coiled-coil 2A [Source:HGNC Symbol;Acc:HGNC:13918]	68.8703	86.7733	48.6924	78.7504
ENSG00000067057	PFKP	phosphofructokinase, platelet [Source:HGNC Symbol;Acc:HGNC:8878]	68.8693	112.075	37.2874	61.728
ENSG00000244038	DDOST	dolichyl-diphosphooligosaccharide--protein glycosyltransferase subunit (non-catalytic) [Source:HGNC Symbol;Acc:HGNC:2728]	68.8245	55.3667	54.5078	98.9654
ENSG00000185624	P4HB	prolyl 4-hydroxylase, beta polypeptide [Source:HGNC Symbol;Acc:HGNC:8548]	68.7059	49.2478	89.8938	227.757
ENSG00000115524	SF3B1	splicing factor 3b, subunit 1, 155kDa [Source:HGNC Symbol;Acc:HGNC:10768]	68.6209	51.196	100.802	63.3839
ENSG00000143774	GUK1	guanylate kinase 1 [Source:HGNC Symbol;Acc:HGNC:4693]	68.5932	54.9459	43.2008	52.9485
ENSG00000084623	EIF3I	eukaryotic translation initiation factor 3, subunit I [Source:HGNC Symbol;Acc:HGNC:3272]	68.4525	32.8178	44.5484	45.0397
ENSG00000116030	SUMO1	small ubiquitin-like modifier 1 [Source:HGNC Symbol;Acc:HGNC:12502]	68.4396	40.6749	69.0231	46.6641
ENSG00000109046	WSB1	WD repeat and SOCS box containing 1 [Source:HGNC Symbol;Acc:HGNC:19221]	68.3381	53.7108	78.697	79.602
ENSG00000105576	TNPO2	transportin 2 [Source:HGNC Symbol;Acc:HGNC:19998]	68.3262	53.401	51.5048	41.3431
ENSG00000138413	IDH1	isocitrate dehydrogenase 1 (NADP+), soluble [Source:HGNC Symbol;Acc:HGNC:5382]	68.2414	142.471	195.086	164.827
ENSG00000182117	NOP10	NOP10 ribonucleoprotein [Source:HGNC Symbol;Acc:HGNC:14378]	68.1096	37.0533	41.1641	27.5357
ENSG00000116852	KIF21B	kinesin family member 21B [Source:HGNC Symbol;Acc:HGNC:29442]	68.0548	85.6221	57.3748	42.4008
ENSG00000090372	STRN4	striatin, calmodulin binding protein 4 [Source:HGNC Symbol;Acc:HGNC:15721]	68.0126	62.4465	61.6402	46.6517
ENSG00000127483	HP1BP3	heterochromatin protein 1, binding protein 3 [Source:HGNC Symbol;Acc:HGNC:24973]	67.9153	38.8074	61.0133	45.7858
ENSG00000112473	SLC39A7	solute carrier family 39 (zinc transporter), member 7 [Source:HGNC Symbol;Acc:HGNC:4927]	67.882	5.21104	4.02587	7.29608
ENSG00000106278	PTPRZ1	protein tyrosine phosphatase, receptor-type, Z polypeptide 1 [Source:HGNC Symbol;Acc:HGNC:9685]	67.8793	53.0812	71.1116	27.3293
ENSG00000134121	CHL1	cell adhesion molecule L1-like [Source:HGNC Symbol;Acc:HGNC:1939]	67.5561	136.899	124.234	50.4598
ENSG00000079459	FDFT1	farnesyl-diphosphate farnesyltransferase 1 [Source:HGNC Symbol;Acc:HGNC:3629]	67.4559	84.6637	79.951	57.208
ENSG00000087274	ADD1	adducin 1 (alpha) [Source:HGNC Symbol;Acc:HGNC:243]	67.4455	87.0129	84.7528	86.3369
ENSG00000188191	PRKAR1B	protein kinase, cAMP-dependent, regulatory, type I, beta [Source:HGNC Symbol;Acc:HGNC:9390]	67.4422	208.479	83.883	118.506
ENSG00000138071	ACTR2	ARP2 actin-related protein 2 homolog (yeast) [Source:HGNC Symbol;Acc:HGNC:169]	67.4334	105.402	73.866	78.6111
ENSG00000164587	RPS14	ribosomal protein S14 [Source:HGNC Symbol;Acc:HGNC:10387]	67.4321	275.135	443.522	459.643
ENSG00000182013	PNMAL1	paraneoplastic Ma antigen family-like 1 [Source:HGNC Symbol;Acc:HGNC:25578]	67.3394	31.8242	36.9488	19.6368
ENSG00000089818	NECAP1	NECAP endocytosis associated 1 [Source:HGNC Symbol;Acc:HGNC:24539]	67.3127	67.354	40.6899	49.9884
ENSG00000123349	PFDN5	prefoldin subunit 5 [Source:HGNC Symbol;Acc:HGNC:8869]	67.2469	70.4097	96.9825	88.6385
ENSG00000174231	PRPF8	pre-mRNA processing factor 8 [Source:HGNC Symbol;Acc:HGNC:17340]	67.1647	39.2257	57.1848	57.3241
ENSG00000107105	ELAVL2	ELAV like neuron-specific RNA binding protein 2 [Source:HGNC Symbol;Acc:HGNC:3313]	67.1277	39.6923	27.9485	37.3851
ENSG00000168439	STIP1	stress-induced phosphoprotein 1 [Source:HGNC Symbol;Acc:HGNC:11387]	66.8734	70.5356	80.8983	68.9378
ENSG00000105426	PTPRS	protein tyrosine phosphatase, receptor type, S [Source:HGNC Symbol;Acc:HGNC:9681]	66.7536	102.202	136.6	70.0964
ENSG00000123416	TUBA1B	tubulin, alpha 1b [Source:HGNC Symbol;Acc:HGNC:18809]	66.7358	128.863	137.072	90.924
ENSG00000240694	PNMA2	paraneoplastic Ma antigen 2 [Source:HGNC Symbol;Acc:HGNC:9159]	66.6759	17.0933	16.5336	9.72838
ENSG00000072071	ADGRL1	adhesion G protein-coupled receptor L1 [Source:HGNC Symbol;Acc:HGNC:20973]	66.6323	78.2267	55.7238	50.0135
ENSG00000106636	YKT6	YKT6 v-SNARE homolog (S. cerevisiae) [Source:HGNC Symbol;Acc:HGNC:16959]	66.5969	72.0845	63.8095	70.5499
ENSG00000149926	FAM57B	family with sequence similarity 57, member B [Source:HGNC Symbol;Acc:HGNC:25295]	66.239	68.6511	8.81403	40.7534
ENSG00000118418	HMGN3	high mobility group nucleosomal binding domain 3 [Source:HGNC Symbol;Acc:HGNC:12312]	66.2329	56.0402	34.6698	19.8935
ENSG00000166426	CRABP1	cellular retinoic acid binding protein 1 [Source:HGNC Symbol;Acc:HGNC:2338]	66.1801	5.82347	4.98642	59.9559
ENSG00000177875	CCDC184	coiled-coil domain containing 184 [Source:HGNC Symbol;Acc:HGNC:33749]	66.115	29.5711	9.53508	37.4
ENSG00000115484	CCT4	chaperonin containing TCP1, subunit 4 (delta) [Source:HGNC Symbol;Acc:HGNC:1617]	66.1015	68.4159	100.78	89.2659
ENSG00000198830	HMGN2	high mobility group nucleosomal binding domain 2 [Source:HGNC Symbol;Acc:HGNC:4986]	66.0128	11.9956	24.7226	18.083
ENSG00000131473	ACLY	ATP citrate lyase [Source:HGNC Symbol;Acc:HGNC:115]	65.9819	125.1	89.9816	128.764
ENSG00000137817	PARP6	poly (ADP-ribose) polymerase family, member 6 [Source:HGNC Symbol;Acc:HGNC:26921]	65.9589	81.674	56.9145	51.8962
ENSG00000175826	CTDNEP1	CTD nuclear envelope phosphatase 1 [Source:HGNC Symbol;Acc:HGNC:19085]	65.9531	39.7466	15.2022	56.3045
ENSG00000101152	DNAJC5	DnaJ (Hsp40) homolog, subfamily C, member 5 [Source:HGNC Symbol;Acc:HGNC:16235]	65.8972	78.3695	58.0014	76.3189
ENSG00000184900	SUMO3	small ubiquitin-like modifier 3 [Source:HGNC Symbol;Acc:HGNC:11124]	65.8927	42.5789	46.4243	54.1967
ENSG00000198732	SMOC1	SPARC related modular calcium binding 1 [Source:HGNC Symbol;Acc:HGNC:20318]	65.8409	4.80622	11.3277	31.2204
ENSG00000067445	TRO	trophinin [Source:HGNC Symbol;Acc:HGNC:12326]	65.6077	34.2164	48.3416	35.2095
ENSG00000225783	MIAT	myocardial infarction associated transcript (non-protein coding) [Source:HGNC Symbol;Acc:HGNC:33425]	65.5707	66.2055	57.8256	27.5471
ENSG00000144746	ARL6IP5	ADP-ribosylation factor-like 6 interacting protein 5 [Source:HGNC Symbol;Acc:HGNC:16937]	65.559	85.2997	52.8966	56.6908
ENSG00000181191	PJA1	praja ring finger 1, E3 ubiquitin protein ligase [Source:HGNC Symbol;Acc:HGNC:16648]	65.4548	82.4475	79.5437	77.2414
ENSG00000115128	SF3B6	splicing factor 3b, subunit 6, 14kDa [Source:HGNC Symbol;Acc:HGNC:30096]	65.4184	33.7534	47.1563	42.3111
ENSG00000117450	PRDX1	peroxiredoxin 1 [Source:HGNC Symbol;Acc:HGNC:9352]	65.368	54.0673	65.2362	96.7769
ENSG00000109654	TRIM2	tripartite motif containing 2 [Source:HGNC Symbol;Acc:HGNC:15974]	65.339	51.3386	120.225	33.006
ENSG00000178982	EIF3K	eukaryotic translation initiation factor 3, subunit K [Source:HGNC Symbol;Acc:HGNC:24656]	65.2623	78.6376	127.548	123.597
ENSG00000133083	DCLK1	doublecortin-like kinase 1 [Source:HGNC Symbol;Acc:HGNC:2700]	65.1986	133.915	115.955	88.2954
ENSG00000034713	GABARAPL2	GABA(A) receptor-associated protein like 2 [Source:HGNC Symbol;Acc:HGNC:13291]	64.9654	53.1193	49.5987	43.4314
ENSG00000114867	EIF4G1	eukaryotic translation initiation factor 4 gamma, 1 [Source:HGNC Symbol;Acc:HGNC:3296]	64.906	99.6453	86.4818	103.88
ENSG00000178913	TAF7	TAF7 RNA polymerase II, TATA box binding protein (TBP)-associated factor, 55kDa [Source:HGNC Symbol;Acc:HGNC:11541]	64.8059	4.00772	9.20429	9.05674
ENSG00000142089	IFITM3	interferon induced transmembrane protein 3 [Source:HGNC Symbol;Acc:HGNC:5414]	64.7716	19.3367	13.7126	99.1782
ENSG00000141424	SLC39A6	solute carrier family 39 (zinc transporter), member 6 [Source:HGNC Symbol;Acc:HGNC:18607]	64.6557	34.2249	39.6074	39.5078
ENSG00000175416	CLTB	clathrin, light chain B [Source:HGNC Symbol;Acc:HGNC:2091]	64.4779	63.8872	39.3143	34.5299
ENSG00000134884	ARGLU1	arginine and glutamate rich 1 [Source:HGNC Symbol;Acc:HGNC:25482]	64.2519	56.7618	71.2325	43.9151
ENSG00000175550	DRAP1	DR1-associated protein 1 (negative cofactor 2 alpha) [Source:HGNC Symbol;Acc:HGNC:3019]	64.2017	110.412	85.7645	72.1711
ENSG00000132821	VSTM2L	V-set and transmembrane domain containing 2 like [Source:HGNC Symbol;Acc:HGNC:16096]	64.147	149.659	14.1437	32.0695
ENSG00000164032	H2AFZ	H2A histone family, member Z [Source:HGNC Symbol;Acc:HGNC:4741]	64.0563	61.6679	94.8158	53.8085
ENSG00000089597	GANAB	glucosidase, alpha; neutral AB [Source:HGNC Symbol;Acc:HGNC:4138]	63.9455	35.1364	41.1227	69.2917
ENSG00000112697	TMEM30A	transmembrane protein 30A [Source:HGNC Symbol;Acc:HGNC:16667]	63.9432	89.6724	61.2461	71.6487
ENSG00000107130	NCS1	neuronal calcium sensor 1 [Source:HGNC Symbol;Acc:HGNC:3953]	63.9033	58.6205	56.3698	45.5579
ENSG00000106803	SEC61B	Sec61 beta subunit [Source:HGNC Symbol;Acc:HGNC:16993]	63.8909	32.1106	28.8309	44.4656
ENSG00000124767	GLO1	glyoxalase I [Source:HGNC Symbol;Acc:HGNC:4323]	63.8752	24.9902	42.1533	76.3254
ENSG00000178741	COX5A	cytochrome c oxidase subunit Va [Source:HGNC Symbol;Acc:HGNC:2267]	63.7814	175.994	70.0729	99.5239
ENSG00000155506	LARP1	La ribonucleoprotein domain family, member 1 [Source:HGNC Symbol;Acc:HGNC:29531]	63.7432	29.0807	24.2957	35.8549
ENSG00000079215	SLC1A3	solute carrier family 1 (glial high affinity glutamate transporter), member 3 [Source:HGNC Symbol;Acc:HGNC:10941]	63.6946	93.7245	106.899	61.3818
ENSG00000169020	ATP5I	ATP synthase, H+ transporting, mitochondrial Fo complex, subunit E [Source:HGNC Symbol;Acc:HGNC:846]	63.5762	94.3148	103.322	74.6879
ENSG00000213722	DDAH2	dimethylarginine dimethylaminohydrolase 2 [Source:HGNC Symbol;Acc:HGNC:2716]	63.5554	49.1421	80.5643	66.5963
ENSG00000125868	DSTN	destrin (actin depolymerizing factor) [Source:HGNC Symbol;Acc:HGNC:15750]	63.485	124.833	148.295	97.2935
ENSG00000173457	PPP1R14B	protein phosphatase 1, regulatory (inhibitor) subunit 14B [Source:HGNC Symbol;Acc:HGNC:9057]	63.4387	61.1087	121.807	50.6246
ENSG00000147224	PRPS1	phosphoribosyl pyrophosphate synthetase 1 [Source:HGNC Symbol;Acc:HGNC:9462]	63.2623	37.7868	26.0324	27.5815
ENSG00000197102	DYNC1H1	dynein, cytoplasmic 1, heavy chain 1 [Source:HGNC Symbol;Acc:HGNC:2961]	63.231	59.0558	100.716	47.0376
ENSG00000063177	RPL18	ribosomal protein L18 [Source:HGNC Symbol;Acc:HGNC:10310]	63.1899	45.1193	73.3687	62.0171
ENSG00000130382	MLLT1	myeloid/lymphoid or mixed-lineage leukemia; translocated to, 1 [Source:HGNC Symbol;Acc:HGNC:7134]	63.1852	39.6464	31.5213	31.9549
ENSG00000170390	DCLK2	doublecortin-like kinase 2 [Source:HGNC Symbol;Acc:HGNC:19002]	63.0503	22.3923	28.5062	21.5102
ENSG00000188229	TUBB4B	tubulin, beta 4B class IVb [Source:HGNC Symbol;Acc:HGNC:20771]	62.9327	155.188	112.506	141.893
ENSG00000161082	CELF5	CUGBP, Elav-like family member 5 [Source:HGNC Symbol;Acc:HGNC:14058]	62.8914	92.3823	20.3001	25.8993
ENSG00000205581	HMGN1	high mobility group nucleosome binding domain 1 [Source:HGNC Symbol;Acc:HGNC:4984]	62.8769	25.7033	74.1025	53.0039
ENSG00000204308	RNF5	ring finger protein 5, E3 ubiquitin protein ligase [Source:HGNC Symbol;Acc:HGNC:10068]	62.7238	42.8127	10.819	22.9229
ENSG00000178035	IMPDH2	IMP (inosine 5'-monophosphate) dehydrogenase 2 [Source:HGNC Symbol;Acc:HGNC:6053]	62.6637	22.7026	41.5239	42.3299
ENSG00000196507	TCEAL3	transcription elongation factor A (SII)-like 3 [Source:HGNC Symbol;Acc:HGNC:28247]	62.6521	18.1709	11.6191	7.60363
ENSG00000114956	DGUOK	deoxyguanosine kinase [Source:HGNC Symbol;Acc:HGNC:2858]	62.6267	6.64786	10.3259	7.29346
ENSG00000105438	KDELR1	KDEL (Lys-Asp-Glu-Leu) endoplasmic reticulum protein retention receptor 1 [Source:HGNC Symbol;Acc:HGNC:6304]	62.6017	48.8997	36.8173	88.6727
ENSG00000054148	PHPT1	phosphohistidine phosphatase 1 [Source:HGNC Symbol;Acc:HGNC:30033]	62.5951	17.2421	5.92998	11.6879
ENSG00000197958	RPL12	ribosomal protein L12 [Source:HGNC Symbol;Acc:HGNC:10302]	62.591	49.9364	92.894	86.9069
ENSG00000125356	NDUFA1	NADH dehydrogenase (ubiquinone) 1 alpha subcomplex, 1, 7.5kDa [Source:HGNC Symbol;Acc:HGNC:7683]	62.5433	98.2253	81.8358	75.252
ENSG00000198258	UBL5	ubiquitin-like 5 [Source:HGNC Symbol;Acc:HGNC:13736]	62.4842	31.2605	30.7133	22.2171
ENSG00000172500	FIBP	fibroblast growth factor (acidic) intracellular binding protein [Source:HGNC Symbol;Acc:HGNC:3705]	62.4184	27.2923	36.8751	23.9621
ENSG00000131165	CHMP1A	charged multivesicular body protein 1A [Source:HGNC Symbol;Acc:HGNC:8740]	62.4027	61.5837	52.4383	49.5891
ENSG00000168090	COPS6	COP9 signalosome subunit 6 [Source:HGNC Symbol;Acc:HGNC:21749]	62.3974	53.8986	24.4785	53.3699
ENSG00000198825	INPP5F	inositol polyphosphate-5-phosphatase F [Source:HGNC Symbol;Acc:HGNC:17054]	62.3214	81.1477	75.0484	155.587
ENSG00000188157	AGRN	agrin [Source:HGNC Symbol;Acc:HGNC:329]	62.2179	53.8619	60.6109	47.0901
ENSG00000177885	GRB2	growth factor receptor-bound protein 2 [Source:HGNC Symbol;Acc:HGNC:4566]	62.1915	82.0657	45.8865	57.4644
ENSG00000142875	PRKACB	protein kinase, cAMP-dependent, catalytic, beta [Source:HGNC Symbol;Acc:HGNC:9381]	62.187	103.618	91.8093	92.3841
ENSG00000196814	MVB12B	multivesicular body subunit 12B [Source:HGNC Symbol;Acc:HGNC:23368]	62.1604	38.5124	40.1867	36.0631
ENSG00000152556	PFKM	phosphofructokinase, muscle [Source:HGNC Symbol;Acc:HGNC:8877]	62.1194	86.0824	53.2009	53.5541
ENSG00000101161	PRPF6	pre-mRNA processing factor 6 [Source:HGNC Symbol;Acc:HGNC:15860]	62.0502	21.9126	31.6644	28.259
ENSG00000137309	HMGA1	high mobility group AT-hook 1 [Source:HGNC Symbol;Acc:HGNC:5010]	62.034	11.5817	8.70787	13.7556
ENSG00000173511	VEGFB	vascular endothelial growth factor B [Source:HGNC Symbol;Acc:HGNC:12681]	62.0034	40.642	15.1563	36.2579
ENSG00000153774	CFDP1	craniofacial development protein 1 [Source:HGNC Symbol;Acc:HGNC:1873]	61.7993	63.5319	95.6814	92.845
ENSG00000181449	SOX2	SRY (sex determining region Y)-box 2 [Source:HGNC Symbol;Acc:HGNC:11195]	61.7826	31.96	44.8477	23.8085
ENSG00000140391	TSPAN3	tetraspanin 3 [Source:HGNC Symbol;Acc:HGNC:17752]	61.7423	214.226	147.965	166.428
ENSG00000196235	SUPT5H	suppressor of Ty 5 homolog (S. cerevisiae) [Source:HGNC Symbol;Acc:HGNC:11469]	61.682	54.0278	56.8222	55.8897
ENSG00000103160	HSDL1	hydroxysteroid dehydrogenase like 1 [Source:HGNC Symbol;Acc:HGNC:16475]	61.6691	26.8572	42.7968	31.077
ENSG00000101474	APMAP	adipocyte plasma membrane associated protein [Source:HGNC Symbol;Acc:HGNC:13238]	61.6505	19.0781	13.5428	18.1252
ENSG00000033627	ATP6V0A1	ATPase, H+ transporting, lysosomal V0 subunit a1 [Source:HGNC Symbol;Acc:HGNC:865]	61.539	142.304	51.5317	87.7922
ENSG00000144028	SNRNP200	small nuclear ribonucleoprotein 200kDa (U5) [Source:HGNC Symbol;Acc:HGNC:30859]	61.5003	22.8762	42.4111	34.2466
ENSG00000130724	CHMP2A	charged multivesicular body protein 2A [Source:HGNC Symbol;Acc:HGNC:30216]	61.4788	46.2991	59.3198	65.2551
ENSG00000140941	MAP1LC3B	microtubule-associated protein 1 light chain 3 beta [Source:HGNC Symbol;Acc:HGNC:13352]	61.4226	48.4328	54.3498	40.8788
ENSG00000065000	AP3D1	adaptor-related protein complex 3, delta 1 subunit [Source:HGNC Symbol;Acc:HGNC:568]	61.3654	64.7675	59.3679	56.7697
ENSG00000090273	NUDC	nudC nuclear distribution protein [Source:HGNC Symbol;Acc:HGNC:8045]	61.3368	71.3219	71.808	64.5274
ENSG00000135720	DYNC1LI2	dynein, cytoplasmic 1, light intermediate chain 2 [Source:HGNC Symbol;Acc:HGNC:2966]	61.3345	48.0399	55.3256	47.3192
ENSG00000010322	NISCH	nischarin [Source:HGNC Symbol;Acc:HGNC:18006]	61.316	104.453	68.1334	124.579
ENSG00000100804	PSMB5	proteasome (prosome, macropain) subunit, beta type, 5 [Source:HGNC Symbol;Acc:HGNC:9542]	61.3056	63.9533	43.5744	37.3808
ENSG00000132535	DLG4	discs, large homolog 4 (Drosophila) [Source:HGNC Symbol;Acc:HGNC:2903]	61.2805	182.116	51.3869	84.8952
ENSG00000004779	NDUFAB1	NADH dehydrogenase (ubiquinone) 1, alpha/beta subcomplex, 1, 8kDa [Source:HGNC Symbol;Acc:HGNC:7694]	61.2787	14.6522	12.0933	11.7418
ENSG00000213760	ATP6V1G2	ATPase, H+ transporting, lysosomal 13kDa, V1 subunit G2 [Source:HGNC Symbol;Acc:HGNC:862]	61.2207	82.3724	18.7863	47.1666
ENSG00000104853	CLPTM1	cleft lip and palate associated transmembrane protein 1 [Source:HGNC Symbol;Acc:HGNC:2087]	61.1541	43.1907	35.0557	49.7929
ENSG00000088832	FKBP1A	FK506 binding protein 1A, 12kDa [Source:HGNC Symbol;Acc:HGNC:3711]	61.1091	221.048	51.8096	103.609
ENSG00000184840	TMED9	transmembrane emp24 protein transport domain containing 9 [Source:HGNC Symbol;Acc:HGNC:24878]	60.9901	61.3529	38.6694	77.6236
ENSG00000104549	SQLE	squalene epoxidase [Source:HGNC Symbol;Acc:HGNC:11279]	60.9406	96.3921	53.5961	62.9009
ENSG00000154723	ATP5J	ATP synthase, H+ transporting, mitochondrial Fo complex, subunit F6 [Source:HGNC Symbol;Acc:HGNC:847]	60.919	104.116	71.7666	114.988
ENSG00000107742	SPOCK2	sparc/osteonectin, cwcv and kazal-like domains proteoglycan (testican) 2 [Source:HGNC Symbol;Acc:HGNC:13564]	60.863	107.909	46.4658	65.3007
ENSG00000115306	SPTBN1	spectrin, beta, non-erythrocytic 1 [Source:HGNC Symbol;Acc:HGNC:11275]	60.8558	133.524	136.12	109.511
ENSG00000101460	MAP1LC3A	microtubule-associated protein 1 light chain 3 alpha [Source:HGNC Symbol;Acc:HGNC:6838]	60.6379	213.192	80.9902	96.7711
ENSG00000110107	PRPF19	pre-mRNA processing factor 19 [Source:HGNC Symbol;Acc:HGNC:17896]	60.6363	37.1462	37.5194	42.9474
ENSG00000108344	PSMD3	proteasome (prosome, macropain) 26S subunit, non-ATPase, 3 [Source:HGNC Symbol;Acc:HGNC:9560]	60.6349	54.484	36.7301	48.4397
ENSG00000097021	ACOT7	acyl-CoA thioesterase 7 [Source:HGNC Symbol;Acc:HGNC:24157]	60.6182	240.204	110.687	124.452
ENSG00000124562	SNRPC	small nuclear ribonucleoprotein polypeptide C [Source:HGNC Symbol;Acc:HGNC:11157]	60.4392	5.269	5.9368	4.47069
ENSG00000062485	CS	citrate synthase [Source:HGNC Symbol;Acc:HGNC:2422]	60.3693	132.623	101.839	137.31
ENSG00000111371	SLC38A1	solute carrier family 38, member 1 [Source:HGNC Symbol;Acc:HGNC:13447]	60.2737	29.1663	29.8709	48.2569
ENSG00000143569	UBAP2L	ubiquitin associated protein 2-like [Source:HGNC Symbol;Acc:HGNC:29877]	60.2528	43.1029	31.6864	58.1826
ENSG00000129596	CDO1	cysteine dioxygenase type 1 [Source:HGNC Symbol;Acc:HGNC:1795]	60.1901	24.2314	23.3915	44.7568
ENSG00000130332	LSM7	LSM7 homolog, U6 small nuclear RNA and mRNA degradation associated [Source:HGNC Symbol;Acc:HGNC:20470]	60.1869	36.2382	40.9093	30.9997
ENSG00000131584	ACAP3	ArfGAP with coiled-coil, ankyrin repeat and PH domains 3 [Source:HGNC Symbol;Acc:HGNC:16754]	60.1268	53.6695	39.9693	21.3161
ENSG00000074317	SNCB	synuclein, beta [Source:HGNC Symbol;Acc:HGNC:11140]	60.118	242.208	8.7609	109.144
ENSG00000155093	PTPRN2	protein tyrosine phosphatase, receptor type, N polypeptide 2 [Source:HGNC Symbol;Acc:HGNC:9677]	59.9728	56.0954	26.5547	32.4235
ENSG00000067064	IDI1	isopentenyl-diphosphate delta isomerase 1 [Source:HGNC Symbol;Acc:HGNC:5387]	59.9058	13.5633	9.87057	7.01136
ENSG00000034053	APBA2	amyloid beta (A4) precursor protein-binding, family A, member 2 [Source:HGNC Symbol;Acc:HGNC:579]	59.8608	65.1487	61.325	38.8164
ENSG00000178980	SEPW1	selenoprotein W, 1 [Source:HGNC Symbol;Acc:HGNC:10752]	59.8591	720.347	313.41	320.923
ENSG00000154917	RAB6B	RAB6B, member RAS oncogene family [Source:HGNC Symbol;Acc:HGNC:14902]	59.6482	214.707	51.7704	139.512
ENSG00000164054	SHISA5	shisa family member 5 [Source:HGNC Symbol;Acc:HGNC:30376]	59.6008	18.645	15.0318	33.0546
ENSG00000132155	RAF1	Raf-1 proto-oncogene, serine/threonine kinase [Source:HGNC Symbol;Acc:HGNC:9829]	59.5901	24.2232	33.0169	22.3765
ENSG00000107758	PPP3CB	protein phosphatase 3, catalytic subunit, beta isozyme [Source:HGNC Symbol;Acc:HGNC:9315]	59.4974	126.182	72.3578	70.9872
ENSG00000059915	PSD	pleckstrin and Sec7 domain containing [Source:HGNC Symbol;Acc:HGNC:9507]	59.4961	145.732	66.3312	37.6933
ENSG00000178952	TUFM	Tu translation elongation factor, mitochondrial [Source:HGNC Symbol;Acc:HGNC:12420]	59.4662	24.075	35.041	22.582
ENSG00000096092	TMEM14A	transmembrane protein 14A [Source:HGNC Symbol;Acc:HGNC:21076]	59.455	7.36127	4.31693	4.66357
ENSG00000134287	ARF3	ADP-ribosylation factor 3 [Source:HGNC Symbol;Acc:HGNC:654]	59.3047	281.141	63.6027	113.571
ENSG00000054523	KIF1B	kinesin family member 1B [Source:HGNC Symbol;Acc:HGNC:16636]	59.2727	89.6892	74.5023	61.1323
ENSG00000071054	MAP4K4	mitogen-activated protein kinase kinase kinase kinase 4 [Source:HGNC Symbol;Acc:HGNC:6866]	59.2338	59.9178	113.209	67.1168
ENSG00000169710	FASN	fatty acid synthase [Source:HGNC Symbol;Acc:HGNC:3594]	59.1803	69.0345	87.1989	53.3822
ENSG00000184076	UQCR10	ubiquinol-cytochrome c reductase, complex III subunit X [Source:HGNC Symbol;Acc:HGNC:30863]	59.1749	119.359	99.0902	99.9373
ENSG00000143324	XPR1	xenotropic and polytropic retrovirus receptor 1 [Source:HGNC Symbol;Acc:HGNC:12827]	59.1561	35.2713	42.4521	39.798
ENSG00000241685	ARPC1A	actin related protein 2/3 complex, subunit 1A, 41kDa [Source:HGNC Symbol;Acc:HGNC:703]	59.1465	92.235	75.9437	78.0916
ENSG00000253719	ATXN7L3B	ataxin 7-like 3B [Source:HGNC Symbol;Acc:HGNC:37931]	59.1115	110.4	122.826	113.374
ENSG00000075945	KIFAP3	kinesin-associated protein 3 [Source:HGNC Symbol;Acc:HGNC:17060]	59.1035	107.317	95.2873	82.7713
ENSG00000196961	AP2A1	adaptor-related protein complex 2, alpha 1 subunit [Source:HGNC Symbol;Acc:HGNC:561]	59.0683	100.157	39.674	53.0562
ENSG00000125841	NRSN2	neurensin 2 [Source:HGNC Symbol;Acc:HGNC:16229]	58.9742	10.1385	0.942351	34.0702
ENSG00000101489	CELF4	CUGBP, Elav-like family member 4 [Source:HGNC Symbol;Acc:HGNC:14015]	58.9257	126.163	68.1501	60.1139
ENSG00000160310	PRMT2	protein arginine methyltransferase 2 [Source:HGNC Symbol;Acc:HGNC:5186]	58.9035	84.0171	68.3351	66.1545
ENSG00000114353	GNAI2	guanine nucleotide binding protein (G protein), alpha inhibiting activity polypeptide 2 [Source:HGNC Symbol;Acc:HGNC:4385]	58.884	109.687	93.0212	141.041
ENSG00000089737	DDX24	DEAD (Asp-Glu-Ala-Asp) box helicase 24 [Source:HGNC Symbol;Acc:HGNC:13266]	58.8802	43.1783	44.3416	54.9233
ENSG00000167615	LENG8	leukocyte receptor cluster (LRC) member 8 [Source:HGNC Symbol;Acc:HGNC:15500]	58.8758	48.9779	16.5579	33.3808
ENSG00000126247	CAPNS1	calpain, small subunit 1 [Source:HGNC Symbol;Acc:HGNC:1481]	58.8322	89.5075	64.2692	117.711
ENSG00000138834	MAPK8IP3	mitogen-activated protein kinase 8 interacting protein 3 [Source:HGNC Symbol;Acc:HGNC:6884]	58.8	53.3533	43.5267	33.0803
ENSG00000020129	NCDN	neurochondrin [Source:HGNC Symbol;Acc:HGNC:17597]	58.7875	185.705	73.7473	51.8279
ENSG00000189403	HMGB1	high mobility group box 1 [Source:HGNC Symbol;Acc:HGNC:4983]	58.6803	41.2144	86.3033	33.1851
ENSG00000106105	GARS	glycyl-tRNA synthetase [Source:HGNC Symbol;Acc:HGNC:4162]	58.6672	87.6861	98.7103	92.5335
ENSG00000129625	REEP5	receptor accessory protein 5 [Source:HGNC Symbol;Acc:HGNC:30077]	58.5729	203.945	91.5891	165.076
ENSG00000143420	ENSA	endosulfine alpha [Source:HGNC Symbol;Acc:HGNC:3360]	58.5107	41.9574	43.195	46.9765
ENSG00000166257	SCN3B	sodium channel, voltage gated, type III beta subunit [Source:HGNC Symbol;Acc:HGNC:20665]	58.4278	53.4273	39.8657	52.2417
ENSG00000100604	CHGA	chromogranin A [Source:HGNC Symbol;Acc:HGNC:1929]	58.3408	66.956	34.7102	60.7802
ENSG00000133243	BTBD2	BTB (POZ) domain containing 2 [Source:HGNC Symbol;Acc:HGNC:15504]	58.3343	32.9102	22.3564	26.3682
ENSG00000233927	RPS28	ribosomal protein S28 [Source:HGNC Symbol;Acc:HGNC:10418]	58.3274	111.356	258.65	127.612
ENSG00000142549	IGLON5	IgLON family member 5 [Source:HGNC Symbol;Acc:HGNC:34550]	58.2598	30.9022	9.62209	44.3685
ENSG00000065609	SNAP91	synaptosomal-associated protein, 91kDa [Source:HGNC Symbol;Acc:HGNC:14986]	58.2555	132.756	60.3528	56.1655
ENSG00000159377	PSMB4	proteasome (prosome, macropain) subunit, beta type, 4 [Source:HGNC Symbol;Acc:HGNC:9541]	58.2391	114.048	111.662	102.951
ENSG00000116754	SRSF11	serine/arginine-rich splicing factor 11 [Source:HGNC Symbol;Acc:HGNC:10782]	58.1492	62.2847	52.5355	64.9276
ENSG00000213626	LBH	limb bud and heart development [Source:HGNC Symbol;Acc:HGNC:29532]	58.1423	25.0456	14.3223	39.0995
ENSG00000085662	AKR1B1	aldo-keto reductase family 1, member B1 (aldose reductase) [Source:HGNC Symbol;Acc:HGNC:381]	58.0522	6.94203	8.25539	8.69833
ENSG00000159840	ZYX	zyxin [Source:HGNC Symbol;Acc:HGNC:13200]	58.043	14.3164	9.23032	31.8544
ENSG00000155511	GRIA1	glutamate receptor, ionotropic, AMPA 1 [Source:HGNC Symbol;Acc:HGNC:4571]	58.0283	66.0516	62.1469	15.2198
ENSG00000108561	C1QBP	complement component 1, q subcomponent binding protein [Source:HGNC Symbol;Acc:HGNC:1243]	57.9053	32.1365	18.039	35.8052
ENSG00000129055	ANAPC13	anaphase promoting complex subunit 13 [Source:HGNC Symbol;Acc:HGNC:24540]	57.8628	12.4829	16.2223	14.4159
ENSG00000084090	STARD7	StAR-related lipid transfer (START) domain containing 7 [Source:HGNC Symbol;Acc:HGNC:18063]	57.786	68.0225	68.8354	45.1272
ENSG00000115457	IGFBP2	insulin-like growth factor binding protein 2, 36kDa [Source:HGNC Symbol;Acc:HGNC:5471]	57.716	91.1472	121.11	239.575
ENSG00000166986	MARS	methionyl-tRNA synthetase [Source:HGNC Symbol;Acc:HGNC:6898]	57.5848	24.4387	23.9926	26.9947
ENSG00000167508	MVD	mevalonate (diphospho) decarboxylase [Source:HGNC Symbol;Acc:HGNC:7529]	57.4907	77.9363	30.6877	33.5805
ENSG00000143321	HDGF	hepatoma-derived growth factor [Source:HGNC Symbol;Acc:HGNC:4856]	57.4096	61.8008	71.0376	85.3179
ENSG00000160360	GPSM1	G-protein signaling modulator 1 [Source:HGNC Symbol;Acc:HGNC:17858]	57.3796	62.0855	67.4412	48.9382
ENSG00000104763	ASAH1	N-acylsphingosine amidohydrolase (acid ceramidase) 1 [Source:HGNC Symbol;Acc:HGNC:735]	57.3421	11.6648	16.3106	36.4285
ENSG00000117419	ERI3	ERI1 exoribonuclease family member 3 [Source:HGNC Symbol;Acc:HGNC:17276]	57.2971	113.967	85.3269	71.9511
ENSG00000112290	WASF1	WAS protein family, member 1 [Source:HGNC Symbol;Acc:HGNC:12732]	57.2912	122.267	15.2168	35.38
ENSG00000159363	ATP13A2	ATPase type 13A2 [Source:HGNC Symbol;Acc:HGNC:30213]	57.2838	92.9249	59.3967	51.1737
ENSG00000095059	DHPS	deoxyhypusine synthase [Source:HGNC Symbol;Acc:HGNC:2869]	57.2509	32.8543	21.6889	22.0728
ENSG00000158321	AUTS2	autism susceptibility candidate 2 [Source:HGNC Symbol;Acc:HGNC:14262]	57.1356	13.8274	17.8113	13.9308
ENSG00000172115	CYCS	cytochrome c, somatic [Source:HGNC Symbol;Acc:HGNC:19986]	57.0899	19.992	14.1347	12.2925
ENSG00000119421	NDUFA8	NADH dehydrogenase (ubiquinone) 1 alpha subcomplex, 8, 19kDa [Source:HGNC Symbol;Acc:HGNC:7692]	57.0815	92.2206	66.6243	71.8334
ENSG00000172379	ARNT2	aryl-hydrocarbon receptor nuclear translocator 2 [Source:HGNC Symbol;Acc:HGNC:16876]	56.9669	58.6212	39.3636	46.7626
ENSG00000142156	COL6A1	collagen, type VI, alpha 1 [Source:HGNC Symbol;Acc:HGNC:2211]	56.9106	5.22449	7.72996	190.622
ENSG00000174238	PITPNA	phosphatidylinositol transfer protein, alpha [Source:HGNC Symbol;Acc:HGNC:9001]	56.8683	112.044	50.7335	58.436
ENSG00000113575	PPP2CA	protein phosphatase 2, catalytic subunit, alpha isozyme [Source:HGNC Symbol;Acc:HGNC:9299]	56.8511	72.7943	64.3968	70.3759
ENSG00000167005	NUDT21	nudix (nucleoside diphosphate linked moiety X)-type motif 21 [Source:HGNC Symbol;Acc:HGNC:13870]	56.8248	16.5279	41.3542	19.4875
ENSG00000111481	COPZ1	coatomer protein complex, subunit zeta 1 [Source:HGNC Symbol;Acc:HGNC:2243]	56.7043	61.7026	49.4533	86.7805
ENSG00000129990	SYT5	synaptotagmin V [Source:HGNC Symbol;Acc:HGNC:11513]	56.6973	99.2173	58.2069	19.043
ENSG00000131171	SH3BGRL	SH3 domain binding glutamate-rich protein like [Source:HGNC Symbol;Acc:HGNC:10823]	56.6838	68.3565	99.2104	73.8691
ENSG00000022840	RNF10	ring finger protein 10 [Source:HGNC Symbol;Acc:HGNC:10055]	56.5378	103.307	54.0183	81.6182
ENSG00000126945	HNRNPH2	heterogeneous nuclear ribonucleoprotein H2 (H') [Source:HGNC Symbol;Acc:HGNC:5042]	56.5017	22.164	31.8637	20.5948
ENSG00000177030	DEAF1	DEAF1 transcription factor [Source:HGNC Symbol;Acc:HGNC:14677]	56.4517	75.0746	35.9425	52.4033
ENSG00000102172	SMS	spermine synthase [Source:HGNC Symbol;Acc:HGNC:11123]	56.4167	43.5802	43.428	35.2042
ENSG00000143543	JTB	jumping translocation breakpoint [Source:HGNC Symbol;Acc:HGNC:6201]	56.4101	25.8466	23.3225	25.4174
ENSG00000130725	UBE2M	ubiquitin-conjugating enzyme E2M [Source:HGNC Symbol;Acc:HGNC:12491]	56.3939	109.371	67.5363	68.2219
ENSG00000071553	ATP6AP1	ATPase, H+ transporting, lysosomal accessory protein 1 [Source:HGNC Symbol;Acc:HGNC:868]	56.3283	175.103	91.9134	151.978
ENSG00000166794	PPIB	peptidylprolyl isomerase B (cyclophilin B) [Source:HGNC Symbol;Acc:HGNC:9255]	56.3208	49.1487	55.162	97.23
ENSG00000100979	PLTP	phospholipid transfer protein [Source:HGNC Symbol;Acc:HGNC:9093]	56.3114	9.42908	5.09127	43.1044
ENSG00000142230	SAE1	SUMO1 activating enzyme subunit 1 [Source:HGNC Symbol;Acc:HGNC:30660]	56.2016	63.0271	61.8205	86.4514
ENSG00000108848	LUC7L3	LUC7-like 3 pre-mRNA splicing factor [Source:HGNC Symbol;Acc:HGNC:24309]	56.1559	43.7153	57.813	34.4778
ENSG00000108465	CDK5RAP3	CDK5 regulatory subunit associated protein 3 [Source:HGNC Symbol;Acc:HGNC:18673]	56.1047	16.5639	19.3413	19.089
ENSG00000204619	PPP1R11	protein phosphatase 1, regulatory (inhibitor) subunit 11 [Source:HGNC Symbol;Acc:HGNC:9285]	56.0887	28.3318	34.7539	26.5977
ENSG00000010256	UQCRC1	ubiquinol-cytochrome c reductase core protein I [Source:HGNC Symbol;Acc:HGNC:12585]	56.0469	82.7619	63.5128	69.3045
ENSG00000044115	CTNNA1	catenin (cadherin-associated protein), alpha 1, 102kDa [Source:HGNC Symbol;Acc:HGNC:2509]	56.0102	12.5885	35.4	47.1318
ENSG00000115307	AUP1	ancient ubiquitous protein 1 [Source:HGNC Symbol;Acc:HGNC:891]	55.9502	21.4228	17.7729	25.202
ENSG00000111667	USP5	ubiquitin specific peptidase 5 (isopeptidase T) [Source:HGNC Symbol;Acc:HGNC:12628]	55.789	74.2786	80.1536	75.8512
ENSG00000149600	COMMD7	COMM domain containing 7 [Source:HGNC Symbol;Acc:HGNC:16223]	55.786	11.4215	11.6193	9.72762
ENSG00000130066	SAT1	spermidine/spermine N1-acetyltransferase 1 [Source:HGNC Symbol;Acc:HGNC:10540]	55.7474	16.8252	11.0379	29.6811
ENSG00000167460	TPM4	tropomyosin 4 [Source:HGNC Symbol;Acc:HGNC:12013]	55.715	13.0958	52.5323	56.5974
ENSG00000099817	POLR2E	polymerase (RNA) II (DNA directed) polypeptide E, 25kDa [Source:HGNC Symbol;Acc:HGNC:9192]	55.6292	19.4	14.2569	13.6092
ENSG00000170348	TMED10	transmembrane emp24-like trafficking protein 10 (yeast) [Source:HGNC Symbol;Acc:HGNC:16998]	55.6163	39.2336	29.5509	62.4779
ENSG00000167004	PDIA3	protein disulfide isomerase family A, member 3 [Source:HGNC Symbol;Acc:HGNC:4606]	55.6136	116.037	67.9618	173.344
ENSG00000264364	DYNLL2	dynein, light chain, LC8-type 2 [Source:HGNC Symbol;Acc:HGNC:24596]	55.5876	179.871	32.9723	180.474
ENSG00000174775	HRAS	Harvey rat sarcoma viral oncogene homolog [Source:HGNC Symbol;Acc:HGNC:5173]	55.5529	50.3286	28.7261	24.17
ENSG00000089248	ERP29	endoplasmic reticulum protein 29 [Source:HGNC Symbol;Acc:HGNC:13799]	55.4876	17.2008	14.1788	24.1825
ENSG00000175756	AURKAIP1	aurora kinase A interacting protein 1 [Source:HGNC Symbol;Acc:HGNC:24114]	55.4588	29.0507	28.4703	35.3934
ENSG00000008056	SYN1	synapsin I [Source:HGNC Symbol;Acc:HGNC:11494]	55.4458	159.089	8.93427	85.5379
ENSG00000106682	EIF4H	eukaryotic translation initiation factor 4H [Source:HGNC Symbol;Acc:HGNC:12741]	55.3854	125.241	119.036	106.342
ENSG00000110042	DTX4	deltex 4, E3 ubiquitin ligase [Source:HGNC Symbol;Acc:HGNC:29151]	55.2869	31.3591	37.4115	28.4105
ENSG00000182481	KPNA2	karyopherin alpha 2 (RAG cohort 1, importin alpha 1) [Source:HGNC Symbol;Acc:HGNC:6395]	55.2779	15.6576	32.9853	19.3421
ENSG00000147274	RBMX	RNA binding motif protein, X-linked [Source:HGNC Symbol;Acc:HGNC:9910]	55.2698	37.7751	79.3706	28.7505
ENSG00000113068	PFDN1	prefoldin subunit 1 [Source:HGNC Symbol;Acc:HGNC:8866]	55.2483	41.2249	42.2254	44.5098
ENSG00000127884	ECHS1	enoyl CoA hydratase, short chain, 1, mitochondrial [Source:HGNC Symbol;Acc:HGNC:3151]	55.1931	14.1679	14.5722	14.4567
ENSG00000013275	PSMC4	proteasome (prosome, macropain) 26S subunit, ATPase, 4 [Source:HGNC Symbol;Acc:HGNC:9551]	55.1911	47.2031	64.4178	54.2237
ENSG00000157005	SST	somatostatin [Source:HGNC Symbol;Acc:HGNC:11329]	55.1818	244.296	64.1131	18.3417
ENSG00000204843	DCTN1	dynactin 1 [Source:HGNC Symbol;Acc:HGNC:2711]	55.168	104.256	63.9305	61.5978
ENSG00000025770	NCAPH2	non-SMC condensin II complex, subunit H2 [Source:HGNC Symbol;Acc:HGNC:25071]	55.137	27.5779	34.8949	30.6108
ENSG00000125304	TM9SF2	transmembrane 9 superfamily member 2 [Source:HGNC Symbol;Acc:HGNC:11865]	55.0519	35.927	36.1793	58.4296
ENSG00000127561	SYNGR3	synaptogyrin 3 [Source:HGNC Symbol;Acc:HGNC:11501]	55.035	148.696	63.1878	67.0929
ENSG00000149657	LSM14B	LSM family member 14B [Source:HGNC Symbol;Acc:HGNC:15887]	54.9789	68.5223	84.335	47.3554
ENSG00000015171	ZMYND11	zinc finger, MYND-type containing 11 [Source:HGNC Symbol;Acc:HGNC:16966]	54.9202	71.9181	71.2163	45.9801
ENSG00000086598	TMED2	transmembrane emp24 domain trafficking protein 2 [Source:HGNC Symbol;Acc:HGNC:16996]	54.8941	17.3137	32.9184	29.2705
ENSG00000109332	UBE2D3	ubiquitin-conjugating enzyme E2D 3 [Source:HGNC Symbol;Acc:HGNC:12476]	54.8712	13.2576	15.0985	15.0147
ENSG00000183255	PTTG1IP	pituitary tumor-transforming 1 interacting protein [Source:HGNC Symbol;Acc:HGNC:13524]	54.8257	19.2254	22.7434	55.3894
ENSG00000112335	SNX3	sorting nexin 3 [Source:HGNC Symbol;Acc:HGNC:11174]	54.7478	98.6217	62.3572	88.5376
ENSG00000139910	NOVA1	neuro-oncological ventral antigen 1 [Source:HGNC Symbol;Acc:HGNC:7886]	54.7351	5.56151	3.70287	46.5706
ENSG00000136720	HS6ST1	heparan sulfate 6-O-sulfotransferase 1 [Source:HGNC Symbol;Acc:HGNC:5201]	54.7034	29.9523	23.5526	32.1393
ENSG00000165916	PSMC3	proteasome (prosome, macropain) 26S subunit, ATPase, 3 [Source:HGNC Symbol;Acc:HGNC:9549]	54.7032	70.8167	72.7218	68.7137
ENSG00000117984	CTSD	cathepsin D [Source:HGNC Symbol;Acc:HGNC:2529]	54.6964	101.579	146.187	197.298
ENSG00000197111	PCBP2	poly(rC) binding protein 2 [Source:HGNC Symbol;Acc:HGNC:8648]	54.6861	54.9007	13.7245	101.452
ENSG00000122203	KIAA1191	KIAA1191 [Source:HGNC Symbol;Acc:HGNC:29209]	54.6813	56.9986	57.7947	62.3546
ENSG00000162407	PPAP2B	phosphatidic acid phosphatase type 2B [Source:HGNC Symbol;Acc:HGNC:9229]	54.6378	45.127	41.5212	84.0823
ENSG00000160679	CHTOP	chromatin target of PRMT1 [Source:HGNC Symbol;Acc:HGNC:24511]	54.6349	57.4687	65.8325	54.1124
ENSG00000136485	DCAF7	DDB1 and CUL4 associated factor 7 [Source:HGNC Symbol;Acc:HGNC:30915]	54.6036	68.0721	50.5804	107.955
ENSG00000102241	HTATSF1	HIV-1 Tat specific factor 1 [Source:HGNC Symbol;Acc:HGNC:5276]	54.5815	28.3653	39.0813	33.1392
ENSG00000105698	USF2	upstream transcription factor 2, c-fos interacting [Source:HGNC Symbol;Acc:HGNC:12594]	54.5727	37.9943	24.6509	22.5942
ENSG00000162706	CADM3	cell adhesion molecule 3 [Source:HGNC Symbol;Acc:HGNC:17601]	54.571	140.319	59.8935	56.6988
ENSG00000167283	ATP5L	ATP synthase, H+ transporting, mitochondrial Fo complex, subunit G [Source:HGNC Symbol;Acc:HGNC:14247]	54.4936	86.1055	135.365	93.0128
ENSG00000129636	ITFG1	integrin alpha FG-GAP repeat containing 1 [Source:HGNC Symbol;Acc:HGNC:30697]	54.3045	94.2665	74.3899	73.1333
ENSG00000266412	NCOA4	nuclear receptor coactivator 4 [Source:HGNC Symbol;Acc:HGNC:7671]	54.2794	6.54916	14.5168	8.585
ENSG00000111678	C12orf57	chromosome 12 open reading frame 57 [Source:HGNC Symbol;Acc:HGNC:29521]	54.2655	24.0387	7.99603	13.1061
ENSG00000087152	ATXN7L3	ataxin 7-like 3 [Source:HGNC Symbol;Acc:HGNC:25416]	54.2599	77.0162	48.9096	55.9897
ENSG00000166441	RPL27A	ribosomal protein L27a [Source:HGNC Symbol;Acc:HGNC:10329]	54.1996	83.4712	150.25	110.648
ENSG00000149357	LAMTOR1	late endosomal/lysosomal adaptor, MAPK and MTOR activator 1 [Source:HGNC Symbol;Acc:HGNC:26068]	54.1988	58.9933	57.2422	64.8343
ENSG00000176171	BNIP3	BCL2/adenovirus E1B 19kDa interacting protein 3 [Source:HGNC Symbol;Acc:HGNC:1084]	54.1697	140.009	23.6584	104.554
ENSG00000101365	IDH3B	isocitrate dehydrogenase 3 (NAD+) beta [Source:HGNC Symbol;Acc:HGNC:5385]	54.0919	65.5738	52.4416	63.745
ENSG00000116752	BCAS2	breast carcinoma amplified sequence 2 [Source:HGNC Symbol;Acc:HGNC:975]	54.0633	20.4697	21.3996	18.1124
ENSG00000102038	SMARCA1	SWI/SNF related, matrix associated, actin dependent regulator of chromatin, subfamily a, member 1 [Source:HGNC Symbol;Acc:HGNC:11097]	54.0633	14.9912	20.0899	15.6406
ENSG00000176887	SOX11	SRY (sex determining region Y)-box 11 [Source:HGNC Symbol;Acc:HGNC:11191]	54.0572	19.433	111.742	21.3937
ENSG00000100664	EIF5	eukaryotic translation initiation factor 5 [Source:HGNC Symbol;Acc:HGNC:3299]	54.0563	72.6957	64.4217	76.6924
ENSG00000122515	ZMIZ2	zinc finger, MIZ-type containing 2 [Source:HGNC Symbol;Acc:HGNC:22229]	54.0324	89.2709	23.1517	43.4817
ENSG00000064607	SUGP2	SURP and G patch domain containing 2 [Source:HGNC Symbol;Acc:HGNC:18641]	53.9217	25.1957	25.8889	19.9364
ENSG00000166562	SEC11C	SEC11 homolog C, signal peptidase complex subunit [Source:HGNC Symbol;Acc:HGNC:23400]	53.9076	14.8056	10.6679	9.85747
ENSG00000130770	ATPIF1	ATPase inhibitory factor 1 [Source:HGNC Symbol;Acc:HGNC:871]	53.8919	125.32	131.506	83.6306
ENSG00000054965	FAM168A	family with sequence similarity 168, member A [Source:HGNC Symbol;Acc:HGNC:28999]	53.8237	56.004	35.2731	50.0234
ENSG00000106976	DNM1	dynamin 1 [Source:HGNC Symbol;Acc:HGNC:2972]	53.8193	132.854	25.7593	78.6563
ENSG00000197586	ENTPD6	ectonucleoside triphosphate diphosphohydrolase 6 (putative) [Source:HGNC Symbol;Acc:HGNC:3368]	53.7285	30.2818	18.8327	25.4442
ENSG00000160710	ADAR	adenosine deaminase, RNA-specific [Source:HGNC Symbol;Acc:HGNC:225]	53.6665	23.2363	18.864	21.9153
ENSG00000087087	SRRT	serrate, RNA effector molecule [Source:HGNC Symbol;Acc:HGNC:24101]	53.6469	42.2748	50.9196	39.3288
ENSG00000111276	CDKN1B	cyclin-dependent kinase inhibitor 1B (p27, Kip1) [Source:HGNC Symbol;Acc:HGNC:1785]	53.6194	21.3347	32.5746	11.8749
ENSG00000104112	SCG3	secretogranin III [Source:HGNC Symbol;Acc:HGNC:13707]	53.6013	89.478	81.1625	83.0314
ENSG00000141002	TCF25	transcription factor 25 (basic helix-loop-helix) [Source:HGNC Symbol;Acc:HGNC:29181]	53.5583	178.696	131.224	198.145
ENSG00000158773	USF1	upstream transcription factor 1 [Source:HGNC Symbol;Acc:HGNC:12593]	53.5221	36.0762	58.0071	31.1771
ENSG00000112308	C6orf62	chromosome 6 open reading frame 62 [Source:HGNC Symbol;Acc:HGNC:20998]	53.4162	90.0467	62.2028	68.9636
ENSG00000105255	FSD1	fibronectin type III and SPRY domain containing 1 [Source:HGNC Symbol;Acc:HGNC:13745]	53.412	52.2798	40.4886	36.4324
ENSG00000188186	LAMTOR4	late endosomal/lysosomal adaptor, MAPK and MTOR activator 4 [Source:HGNC Symbol;Acc:HGNC:33772]	53.3988	26.1769	27.1233	26.7307
ENSG00000232112	TMA7	translation machinery associated 7 homolog (S. cerevisiae) [Source:HGNC Symbol;Acc:HGNC:26932]	53.396	63.2726	62.5388	51.051
ENSG00000115677	HDLBP	high density lipoprotein binding protein [Source:HGNC Symbol;Acc:HGNC:4857]	53.3921	32.9348	31.1111	79.4298
ENSG00000100941	PNN	pinin, desmosome associated protein [Source:HGNC Symbol;Acc:HGNC:9162]	53.3759	34.756	31.6672	29.0381
ENSG00000107372	ZFAND5	zinc finger, AN1-type domain 5 [Source:HGNC Symbol;Acc:HGNC:13008]	53.3326	55.4296	54.9632	36.048
ENSG00000165502	RPL36AL	ribosomal protein L36a-like [Source:HGNC Symbol;Acc:HGNC:10346]	53.2547	35.9385	31.2658	25.8157
ENSG00000221890	NPTXR	neuronal pentraxin receptor [Source:HGNC Symbol;Acc:HGNC:7954]	53.1381	98.5288	21.3059	47.5487
ENSG00000122218	COPA	coatomer protein complex, subunit alpha [Source:HGNC Symbol;Acc:HGNC:2230]	53.1239	59.3713	79.1353	83.2429
ENSG00000075415	SLC25A3	solute carrier family 25 (mitochondrial carrier; phosphate carrier), member 3 [Source:HGNC Symbol;Acc:HGNC:10989]	53.0623	89.7478	50.0858	87.8701
ENSG00000117758	STX12	syntaxin 12 [Source:HGNC Symbol;Acc:HGNC:11430]	53.0537	69.5444	60.3612	53.7601
ENSG00000079785	DDX1	DEAD (Asp-Glu-Ala-Asp) box helicase 1 [Source:HGNC Symbol;Acc:HGNC:2734]	53.0319	61.6522	75.4975	69.4633
ENSG00000133606	MKRN1	makorin ring finger protein 1 [Source:HGNC Symbol;Acc:HGNC:7112]	53.0185	73.8137	65.4816	64.8053
ENSG00000164733	CTSB	cathepsin B [Source:HGNC Symbol;Acc:HGNC:2527]	52.9559	69.5243	62.9201	94.4372
ENSG00000125991	ERGIC3	ERGIC and golgi 3 [Source:HGNC Symbol;Acc:HGNC:15927]	52.85	88.1384	72.5263	97.443
ENSG00000108262	GIT1	G protein-coupled receptor kinase interacting ArfGAP 1 [Source:HGNC Symbol;Acc:HGNC:4272]	52.845	75.8504	45.8854	44.9244
ENSG00000029993	HMGB3	high mobility group box 3 [Source:HGNC Symbol;Acc:HGNC:5004]	52.7417	42.1935	59.1876	41.3431
ENSG00000145293	ENOPH1	enolase-phosphatase 1 [Source:HGNC Symbol;Acc:HGNC:24599]	52.6858	29.0382	24.2271	16.8189
ENSG00000018236	CNTN1	contactin 1 [Source:HGNC Symbol;Acc:HGNC:2171]	52.6726	119.189	75.4885	97.1873
ENSG00000065154	OAT	ornithine aminotransferase [Source:HGNC Symbol;Acc:HGNC:8091]	52.6401	48.8404	69.5382	88.7858
ENSG00000108523	RNF167	ring finger protein 167 [Source:HGNC Symbol;Acc:HGNC:24544]	52.6331	16.9398	22.4718	26.1254
ENSG00000063046	EIF4B	eukaryotic translation initiation factor 4B [Source:HGNC Symbol;Acc:HGNC:3285]	52.6122	56.1528	112.635	97.6616
ENSG00000177868	SVBP	small vasohibin binding protein [Source:HGNC Symbol;Acc:HGNC:29204]	52.5565	31.1375	45.9962	29.5541
ENSG00000277791	PSMB3	proteasome (prosome, macropain) subunit, beta type, 3 [Source:HGNC Symbol;Acc:HGNC:9540]	52.5558	36.9776	49.478	42.7397
ENSG00000133878	DUSP26	dual specificity phosphatase 26 (putative) [Source:HGNC Symbol;Acc:HGNC:28161]	52.5391	42.6743	9.72707	28.934
ENSG00000164258	NDUFS4	NADH dehydrogenase (ubiquinone) Fe-S protein 4, 18kDa (NADH-coenzyme Q reductase) [Source:HGNC Symbol;Acc:HGNC:7711]	52.4915	35.1883	42.1396	38.2004
ENSG00000161013	MGAT4B	mannosyl (alpha-1,3-)-glycoprotein beta-1,4-N-acetylglucosaminyltransferase, isozyme B [Source:HGNC Symbol;Acc:HGNC:7048]	52.4435	80.9067	39.3366	33.1182
ENSG00000163875	MEAF6	MYST/Esa1-associated factor 6 [Source:HGNC Symbol;Acc:HGNC:25674]	52.4413	27.3012	17.3668	18.7917
ENSG00000158864	NDUFS2	NADH dehydrogenase (ubiquinone) Fe-S protein 2, 49kDa (NADH-coenzyme Q reductase) [Source:HGNC Symbol;Acc:HGNC:7708]	52.4037	86.6157	81.046	89.8547
ENSG00000152377	SPOCK1	sparc/osteonectin, cwcv and kazal-like domains proteoglycan (testican) 1 [Source:HGNC Symbol;Acc:HGNC:11251]	52.3713	59.9353	12.5331	34.9678
ENSG00000136928	GABBR2	gamma-aminobutyric acid (GABA) B receptor, 2 [Source:HGNC Symbol;Acc:HGNC:4507]	52.3468	55.4032	20.6754	26.9587
ENSG00000084628	NKAIN1	Na+/K+ transporting ATPase interacting 1 [Source:HGNC Symbol;Acc:HGNC:25743]	52.3251	65.1518	46.6726	35.6544
ENSG00000084733	RAB10	RAB10, member RAS oncogene family [Source:HGNC Symbol;Acc:HGNC:9759]	52.286	103.45	85.8782	86.1088
ENSG00000133612	AGAP3	ArfGAP with GTPase domain, ankyrin repeat and PH domain 3 [Source:HGNC Symbol;Acc:HGNC:16923]	52.2284	108.433	67.3817	37.7393
ENSG00000112081	SRSF3	serine/arginine-rich splicing factor 3 [Source:HGNC Symbol;Acc:HGNC:10785]	52.1832	3.27279	0.782948	3.36357
ENSG00000107863	ARHGAP21	Rho GTPase activating protein 21 [Source:HGNC Symbol;Acc:HGNC:23725]	52.0536	31.1201	34.1776	25.8429
ENSG00000139613	SMARCC2	SWI/SNF related, matrix associated, actin dependent regulator of chromatin, subfamily c, member 2 [Source:HGNC Symbol;Acc:HGNC:11105]	51.9798	79.9044	88.3053	57.4052
ENSG00000135334	AKIRIN2	akirin 2 [Source:HGNC Symbol;Acc:HGNC:21407]	51.9475	60.5752	58.7874	48.3098
ENSG00000101361	NOP56	NOP56 ribonucleoprotein [Source:HGNC Symbol;Acc:HGNC:15911]	51.9471	30.2415	37.7045	29.8803
ENSG00000130643	CALY	calcyon neuron-specific vesicular protein [Source:HGNC Symbol;Acc:HGNC:17938]	51.8521	104.518	37.1754	68.698
ENSG00000117362	APH1A	APH1A gamma secretase subunit [Source:HGNC Symbol;Acc:HGNC:29509]	51.8391	8.92973	10.5108	11.6496
ENSG00000105613	MAST1	microtubule associated serine/threonine kinase 1 [Source:HGNC Symbol;Acc:HGNC:19034]	51.7894	37.169	10.9006	23.764
ENSG00000186106	ANKRD46	ankyrin repeat domain 46 [Source:HGNC Symbol;Acc:HGNC:27229]	51.7842	76.9144	44.1782	58.1985
ENSG00000068971	PPP2R5B	protein phosphatase 2, regulatory subunit B', beta [Source:HGNC Symbol;Acc:HGNC:9310]	51.7807	82.3818	59.667	59.7559
ENSG00000168488	ATXN2L	ataxin 2-like [Source:HGNC Symbol;Acc:HGNC:31326]	51.7419	70.868	18.1659	54.9104
ENSG00000173113	TRMT112	tRNA methyltransferase 11-2 homolog (S. cerevisiae) [Source:HGNC Symbol;Acc:HGNC:26940]	51.6771	10.5319	9.74612	10.5197
ENSG00000092051	JPH4	junctophilin 4 [Source:HGNC Symbol;Acc:HGNC:20156]	51.6046	106.724	29.7948	25.1835
ENSG00000086065	CHMP5	charged multivesicular body protein 5 [Source:HGNC Symbol;Acc:HGNC:26942]	51.5906	52.1464	60.6665	51.4127
ENSG00000167619	TMEM145	transmembrane protein 145 [Source:HGNC Symbol;Acc:HGNC:26912]	51.5756	46.0028	11.9402	29.7859
ENSG00000125166	GOT2	glutamic-oxaloacetic transaminase 2, mitochondrial [Source:HGNC Symbol;Acc:HGNC:4433]	51.5553	67.0635	56.1683	58.9484
ENSG00000105669	COPE	coatomer protein complex, subunit epsilon [Source:HGNC Symbol;Acc:HGNC:2234]	51.5403	28.9719	21.5202	32.1077
ENSG00000198408	MGEA5	meningioma expressed antigen 5 (hyaluronidase) [Source:HGNC Symbol;Acc:HGNC:7056]	51.5179	47.6903	66.288	42.218
ENSG00000105854	PON2	paraoxonase 2 [Source:HGNC Symbol;Acc:HGNC:9205]	51.5114	7.95589	9.17594	12.403
ENSG00000115226	FNDC4	fibronectin type III domain containing 4 [Source:HGNC Symbol;Acc:HGNC:20239]	51.4543	46.533	40.5217	28.7552
ENSG00000172465	TCEAL1	transcription elongation factor A (SII)-like 1 [Source:HGNC Symbol;Acc:HGNC:11616]	51.3646	6.97492	6.3093	5.70153
ENSG00000164970	FAM219A	family with sequence similarity 219, member A [Source:HGNC Symbol;Acc:HGNC:19920]	51.3075	67.1981	14.8512	35.8428
ENSG00000198356	ASNA1	arsA arsenite transporter, ATP-binding, homolog 1 (bacterial) [Source:HGNC Symbol;Acc:HGNC:752]	51.2701	66.0891	64.7175	60.8645
ENSG00000073921	PICALM	phosphatidylinositol binding clathrin assembly protein [Source:HGNC Symbol;Acc:HGNC:15514]	51.2477	52.2501	85.9378	59.1704
ENSG00000132471	WBP2	WW domain binding protein 2 [Source:HGNC Symbol;Acc:HGNC:12738]	51.2025	125.195	58.1335	89.5242
ENSG00000137876	RSL24D1	ribosomal L24 domain containing 1 [Source:HGNC Symbol;Acc:HGNC:18479]	51.1727	19.2194	26.4886	18.0686
ENSG00000181789	COPG1	coatomer protein complex, subunit gamma 1 [Source:HGNC Symbol;Acc:HGNC:2236]	51.1123	42.2112	35.6272	54.7305
ENSG00000007080	CCDC124	coiled-coil domain containing 124 [Source:HGNC Symbol;Acc:HGNC:25171]	51.0827	75.9908	39.1731	29.2348
ENSG00000125901	MRPS26	mitochondrial ribosomal protein S26 [Source:HGNC Symbol;Acc:HGNC:14045]	51.0288	11.4847	7.18797	7.60764
ENSG00000188895	MSL1	male-specific lethal 1 homolog (Drosophila) [Source:HGNC Symbol;Acc:HGNC:27905]	50.9116	41.0704	30.0484	40.453
ENSG00000004142	POLDIP2	polymerase (DNA-directed), delta interacting protein 2 [Source:HGNC Symbol;Acc:HGNC:23781]	50.8776	43.6968	48.429	46.4194
ENSG00000106244	PDAP1	PDGFA associated protein 1 [Source:HGNC Symbol;Acc:HGNC:14634]	50.8744	51.846	52.3963	43.7291
ENSG00000105655	ISYNA1	inositol-3-phosphate synthase 1 [Source:HGNC Symbol;Acc:HGNC:29821]	50.8257	10.8283	12.2305	23.8797
ENSG00000182944	EWSR1	EWS RNA-binding protein 1 [Source:HGNC Symbol;Acc:HGNC:3508]	50.8109	93.9197	164.448	97.7406
ENSG00000204227	RING1	ring finger protein 1 [Source:HGNC Symbol;Acc:HGNC:10018]	50.7973	7.33679	7.12145	8.86541
ENSG00000197858	GPAA1	glycosylphosphatidylinositol anchor attachment 1 [Source:HGNC Symbol;Acc:HGNC:4446]	50.6421	19.3833	18.3095	21.7383
ENSG00000090861	AARS	alanyl-tRNA synthetase [Source:HGNC Symbol;Acc:HGNC:20]	50.6138	46.3851	36.3877	55.3005
ENSG00000115762	PLEKHB2	pleckstrin homology domain containing, family B (evectins) member 2 [Source:HGNC Symbol;Acc:HGNC:19236]	50.5064	50.6537	18.4362	21.0259
ENSG00000126217	MCF2L	MCF.2 cell line derived transforming sequence-like [Source:HGNC Symbol;Acc:HGNC:14576]	50.4106	43.0591	75.5886	28.5768
ENSG00000149923	PPP4C	protein phosphatase 4, catalytic subunit [Source:HGNC Symbol;Acc:HGNC:9319]	50.4022	25.4068	44.4793	51.0407
ENSG00000082641	NFE2L1	nuclear factor, erythroid 2-like 1 [Source:HGNC Symbol;Acc:HGNC:7781]	50.3718	55.7755	33.7787	74.43
ENSG00000148672	GLUD1	glutamate dehydrogenase 1 [Source:HGNC Symbol;Acc:HGNC:4335]	50.3442	65.6789	83.9561	88.8029
ENSG00000167470	MIDN	midnolin [Source:HGNC Symbol;Acc:HGNC:16298]	50.3213	36.3158	39.1545	31.8371
ENSG00000184752	NDUFA12	NADH dehydrogenase (ubiquinone) 1 alpha subcomplex, 12 [Source:HGNC Symbol;Acc:HGNC:23987]	50.2446	27.7028	33.887	21.5063
ENSG00000150459	SAP18	Sin3A-associated protein, 18kDa [Source:HGNC Symbol;Acc:HGNC:10530]	50.2043	17.6506	17.0888	13.7396
ENSG00000140740	UQCRC2	ubiquinol-cytochrome c reductase core protein II [Source:HGNC Symbol;Acc:HGNC:12586]	50.0662	107.268	88.0984	100.523
ENSG00000134440	NARS	asparaginyl-tRNA synthetase [Source:HGNC Symbol;Acc:HGNC:7643]	49.9648	88.4931	71.8977	84.8957
ENSG00000111642	CHD4	chromodomain helicase DNA binding protein 4 [Source:HGNC Symbol;Acc:HGNC:1919]	49.9545	27.2617	60.1595	52.7012
ENSG00000100075	SLC25A1	solute carrier family 25 (mitochondrial carrier; citrate transporter), member 1 [Source:HGNC Symbol;Acc:HGNC:10979]	49.8905	82.6151	39.189	51.2051
ENSG00000123989	CHPF	chondroitin polymerizing factor [Source:HGNC Symbol;Acc:HGNC:24291]	49.806	41.0203	19.0554	24.6993
ENSG00000174574	AKIRIN1	akirin 1 [Source:HGNC Symbol;Acc:HGNC:25744]	49.8027	21.7013	21.2402	24.0627
ENSG00000198853	RUSC2	RUN and SH3 domain containing 2 [Source:HGNC Symbol;Acc:HGNC:23625]	49.7403	47.5733	49.3081	30.0291
ENSG00000112511	PHF1	PHD finger protein 1 [Source:HGNC Symbol;Acc:HGNC:8919]	49.727	15.4014	9.36615	19.4603
ENSG00000104408	EIF3E	eukaryotic translation initiation factor 3, subunit E [Source:HGNC Symbol;Acc:HGNC:3277]	49.6918	54.7239	107.385	89.0834
ENSG00000101350	KIF3B	kinesin family member 3B [Source:HGNC Symbol;Acc:HGNC:6320]	49.6614	37.5184	33.6319	24.8209
ENSG00000055163	CYFIP2	cytoplasmic FMR1 interacting protein 2 [Source:HGNC Symbol;Acc:HGNC:13760]	49.6599	66.4209	39.1	46.0957
ENSG00000013441	CLK1	CDC-like kinase 1 [Source:HGNC Symbol;Acc:HGNC:2068]	49.5183	16.3776	34.6814	24.2996
ENSG00000159720	ATP6V0D1	ATPase, H+ transporting, lysosomal 38kDa, V0 subunit d1 [Source:HGNC Symbol;Acc:HGNC:13724]	49.4445	159.982	102.604	130.747
ENSG00000135250	SRPK2	SRSF protein kinase 2 [Source:HGNC Symbol;Acc:HGNC:11306]	49.3923	27.8325	31.7768	21.0837
ENSG00000124194	GDAP1L1	ganglioside induced differentiation associated protein 1-like 1 [Source:HGNC Symbol;Acc:HGNC:4213]	49.3423	49.9179	35.4355	35.3165
ENSG00000131966	ACTR10	actin-related protein 10 homolog (S. cerevisiae) [Source:HGNC Symbol;Acc:HGNC:17372]	49.3031	36.2649	32.793	31.3717
ENSG00000162368	CMPK1	cytidine monophosphate (UMP-CMP) kinase 1, cytosolic [Source:HGNC Symbol;Acc:HGNC:18170]	49.2907	48.4466	34.9391	50.8445
ENSG00000166407	LMO1	LIM domain only 1 (rhombotin 1) [Source:HGNC Symbol;Acc:HGNC:6641]	49.2791	39.6457	22.9633	7.60947
ENSG00000124193	SRSF6	serine/arginine-rich splicing factor 6 [Source:HGNC Symbol;Acc:HGNC:10788]	49.273	46.4243	64.4344	69.3898
ENSG00000143294	PRCC	papillary renal cell carcinoma (translocation-associated) [Source:HGNC Symbol;Acc:HGNC:9343]	49.2491	30.2367	32.3941	30.426
ENSG00000109929	SC5D	sterol-C5-desaturase [Source:HGNC Symbol;Acc:HGNC:10547]	49.224	35.1036	30.7119	23.7214
ENSG00000127837	AAMP	angio-associated, migratory cell protein [Source:HGNC Symbol;Acc:HGNC:18]	49.1917	53.0328	46.121	54.3327
ENSG00000179364	PACS2	phosphofurin acidic cluster sorting protein 2 [Source:HGNC Symbol;Acc:HGNC:23794]	49.1634	49.1204	43.6794	37.9219
ENSG00000205937	RNPS1	RNA binding protein S1, serine-rich domain [Source:HGNC Symbol;Acc:HGNC:10080]	49.0958	35.7513	42.9178	31.105
ENSG00000132635	PCED1A	PC-esterase domain containing 1A [Source:HGNC Symbol;Acc:HGNC:16212]	49.0885	9.2416	9.57052	10.0379
ENSG00000162738	VANGL2	VANGL planar cell polarity protein 2 [Source:HGNC Symbol;Acc:HGNC:15511]	49.0563	9.50828	10.4888	16.9884
ENSG00000131051	RBM39	RNA binding motif protein 39 [Source:HGNC Symbol;Acc:HGNC:15923]	49.0421	67.733	126.243	91.0867
ENSG00000140557	ST8SIA2	ST8 alpha-N-acetyl-neuraminide alpha-2,8-sialyltransferase 2 [Source:HGNC Symbol;Acc:HGNC:10870]	49.0193	44.0676	16.114	41.1144
ENSG00000253352	TUG1	taurine up-regulated 1 (non-protein coding) [Source:HGNC Symbol;Acc:HGNC:26066]	49.0076	23.1108	44.565	39.1349
ENSG00000189241	TSPYL1	TSPY-like 1 [Source:HGNC Symbol;Acc:HGNC:12382]	48.9999	43.005	39.8798	40.9419
ENSG00000186298	PPP1CC	protein phosphatase 1, catalytic subunit, gamma isozyme [Source:HGNC Symbol;Acc:HGNC:9283]	48.9999	30.3504	53.4228	28.4742
ENSG00000156642	NPTN	neuroplastin [Source:HGNC Symbol;Acc:HGNC:17867]	48.9921	108.365	46.2939	63.3613
ENSG00000159069	FBXW5	F-box and WD repeat domain containing 5 [Source:HGNC Symbol;Acc:HGNC:13613]	48.9917	42.7577	33.5356	29.6015
ENSG00000131236	CAP1	CAP, adenylate cyclase-associated protein 1 (yeast) [Source:HGNC Symbol;Acc:HGNC:20040]	48.9811	97.005	72.8267	88.8077
ENSG00000100554	ATP6V1D	ATPase, H+ transporting, lysosomal 34kDa, V1 subunit D [Source:HGNC Symbol;Acc:HGNC:13527]	48.97	102.841	64.221	71.3074
ENSG00000177156	TALDO1	transaldolase 1 [Source:HGNC Symbol;Acc:HGNC:11559]	48.8706	81.9705	92.941	57.6242
ENSG00000169862	CTNND2	catenin (cadherin-associated protein), delta 2 [Source:HGNC Symbol;Acc:HGNC:2516]	48.8645	51.0657	41.1515	28.7738
ENSG00000099364	FBXL19	F-box and leucine-rich repeat protein 19 [Source:HGNC Symbol;Acc:HGNC:25300]	48.8301	67.644	53.2386	42.3756
ENSG00000147669	POLR2K	polymerase (RNA) II (DNA directed) polypeptide K, 7.0kDa [Source:HGNC Symbol;Acc:HGNC:9198]	48.8173	9.80523	19.3573	7.6293
ENSG00000074855	ANO8	anoctamin 8 [Source:HGNC Symbol;Acc:HGNC:29329]	48.7824	30.1635	27.7988	12.3443
ENSG00000081154	PCNP	PEST proteolytic signal containing nuclear protein [Source:HGNC Symbol;Acc:HGNC:30023]	48.7728	28.7718	35.1532	19.736
ENSG00000104341	LAPTM4B	lysosomal protein transmembrane 4 beta [Source:HGNC Symbol;Acc:HGNC:13646]	48.7665	11.9513	12.4071	40.0144
ENSG00000125827	TMX4	thioredoxin-related transmembrane protein 4 [Source:HGNC Symbol;Acc:HGNC:25237]	48.7225	38.338	39.6325	50.5915
ENSG00000132432	SEC61G	Sec61 gamma subunit [Source:HGNC Symbol;Acc:HGNC:18277]	48.6841	15.2622	25.3448	24.2635
ENSG00000149547	EI24	etoposide induced 2.4 [Source:HGNC Symbol;Acc:HGNC:13276]	48.6797	67.0573	52.3262	63.6393
ENSG00000100836	PABPN1	poly(A) binding protein, nuclear 1 [Source:HGNC Symbol;Acc:HGNC:8565]	48.6624	57.0881	29.4398	28.8307
ENSG00000162374	ELAVL4	ELAV like neuron-specific RNA binding protein 4 [Source:HGNC Symbol;Acc:HGNC:3315]	48.6177	29.7654	27.0054	48.1448
ENSG00000266472	MRPS21	mitochondrial ribosomal protein S21 [Source:HGNC Symbol;Acc:HGNC:14046]	48.5794	40.0634	45.6527	38.2573
ENSG00000145362	ANK2	ankyrin 2, neuronal [Source:HGNC Symbol;Acc:HGNC:493]	48.5196	122.44	144.673	88.2514
ENSG00000119396	RAB14	RAB14, member RAS oncogene family [Source:HGNC Symbol;Acc:HGNC:16524]	48.5045	60.8343	42.8986	54.7437
ENSG00000111726	CMAS	cytidine monophosphate N-acetylneuraminic acid synthetase [Source:HGNC Symbol;Acc:HGNC:18290]	48.4927	41.3679	29.9738	36.6081
ENSG00000130811	EIF3G	eukaryotic translation initiation factor 3, subunit G [Source:HGNC Symbol;Acc:HGNC:3274]	48.4755	54.8157	65.0798	66.4782
ENSG00000108349	CASC3	cancer susceptibility candidate 3 [Source:HGNC Symbol;Acc:HGNC:17040]	48.4549	24.1394	18.484	29.9657
ENSG00000204310	AGPAT1	1-acylglycerol-3-phosphate O-acyltransferase 1 [Source:HGNC Symbol;Acc:HGNC:324]	48.442	76.8269	48.8538	58.3637
ENSG00000185627	PSMD13	proteasome (prosome, macropain) 26S subunit, non-ATPase, 13 [Source:HGNC Symbol;Acc:HGNC:9558]	48.4202	49.999	48.5957	43.4008
ENSG00000047315	POLR2B	polymerase (RNA) II (DNA directed) polypeptide B, 140kDa [Source:HGNC Symbol;Acc:HGNC:9188]	48.4047	23.154	39.3268	31.6735
ENSG00000111843	TMEM14C	transmembrane protein 14C [Source:HGNC Symbol;Acc:HGNC:20952]	48.3192	39.1859	27.7589	43.6306
ENSG00000213593	TMX2	thioredoxin-related transmembrane protein 2 [Source:HGNC Symbol;Acc:HGNC:30739]	48.3086	35.8439	29.5034	49.8636
ENSG00000136450	SRSF1	serine/arginine-rich splicing factor 1 [Source:HGNC Symbol;Acc:HGNC:10780]	48.2954	37.6302	80.6659	50.4513
ENSG00000114646	CSPG5	chondroitin sulfate proteoglycan 5 (neuroglycan C) [Source:HGNC Symbol;Acc:HGNC:2467]	48.2212	54.3243	25.752	27.0139
ENSG00000115266	APC2	adenomatosis polyposis coli 2 [Source:HGNC Symbol;Acc:HGNC:24036]	48.1279	55.8933	66.3776	30.9008
ENSG00000100129	EIF3L	eukaryotic translation initiation factor 3, subunit L [Source:HGNC Symbol;Acc:HGNC:18138]	48.0953	55.1754	83.1776	82.0492
ENSG00000048540	LMO3	LIM domain only 3 (rhombotin-like 2) [Source:HGNC Symbol;Acc:HGNC:6643]	48.0674	28.4494	18.2253	10.4016
ENSG00000134030	CTIF	CBP80/20-dependent translation initiation factor [Source:HGNC Symbol;Acc:HGNC:23925]	48.0529	20.1178	10.4218	17.4667
ENSG00000072062	PRKACA	protein kinase, cAMP-dependent, catalytic, alpha [Source:HGNC Symbol;Acc:HGNC:9380]	48.0083	115.482	52.5702	105.586
ENSG00000124733	MEA1	male-enhanced antigen 1 [Source:HGNC Symbol;Acc:HGNC:6986]	47.9578	73.0634	63.2819	74.4095
ENSG00000141580	WDR45B	WD repeat domain 45B [Source:HGNC Symbol;Acc:HGNC:25072]	47.9295	24.7913	25.3237	35.1837
ENSG00000116649	SRM	spermidine synthase [Source:HGNC Symbol;Acc:HGNC:11296]	47.819	61.5438	52.0591	43.2591
ENSG00000110651	CD81	CD81 molecule [Source:HGNC Symbol;Acc:HGNC:1701]	47.8143	138.834	126.037	229.604
ENSG00000165283	STOML2	stomatin (EPB72)-like 2 [Source:HGNC Symbol;Acc:HGNC:14559]	47.7976	20.089	20.7787	24.4101
ENSG00000100994	PYGB	phosphorylase, glycogen; brain [Source:HGNC Symbol;Acc:HGNC:9723]	47.7943	60.7207	66.3312	87.1931
ENSG00000182307	C8orf33	chromosome 8 open reading frame 33 [Source:HGNC Symbol;Acc:HGNC:26104]	47.7911	12.4502	14.1557	17.3035
ENSG00000179091	CYC1	cytochrome c-1 [Source:HGNC Symbol;Acc:HGNC:2579]	47.7275	138.749	63.7913	95.0801
ENSG00000120727	PAIP2	poly(A) binding protein interacting protein 2 [Source:HGNC Symbol;Acc:HGNC:17970]	47.7251	68.1637	76.8415	108.776
ENSG00000163618	CADPS	Ca++-dependent secretion activator [Source:HGNC Symbol;Acc:HGNC:1426]	47.6846	63.6015	37.8541	39.7429
ENSG00000127054	CPSF3L	cleavage and polyadenylation specific factor 3-like [Source:HGNC Symbol;Acc:HGNC:26052]	47.6792	14.316	18.4711	13.438
ENSG00000160633	SAFB	scaffold attachment factor B [Source:HGNC Symbol;Acc:HGNC:10520]	47.6589	44.4107	36.0085	35.4889
ENSG00000144567	FAM134A	family with sequence similarity 134, member A [Source:HGNC Symbol;Acc:HGNC:28450]	47.5843	74.4352	46.6083	63.5457
ENSG00000145592	RPL37	ribosomal protein L37 [Source:HGNC Symbol;Acc:HGNC:10347]	47.5677	98.3631	220.385	150.112
ENSG00000164096	C4orf3	chromosome 4 open reading frame 3 [Source:HGNC Symbol;Acc:HGNC:19225]	47.4182	23.5115	23.8652	36.5999
ENSG00000117411	B4GALT2	UDP-Gal:betaGlcNAc beta 1,4- galactosyltransferase, polypeptide 2 [Source:HGNC Symbol;Acc:HGNC:925]	47.3784	36.7138	26.6206	20.5859
ENSG00000068400	GRIPAP1	GRIP1 associated protein 1 [Source:HGNC Symbol;Acc:HGNC:18706]	47.3381	26.1994	19.4458	21.2024
ENSG00000008735	MAPK8IP2	mitogen-activated protein kinase 8 interacting protein 2 [Source:HGNC Symbol;Acc:HGNC:6883]	47.3281	56.6127	35.777	28.2665
ENSG00000109107	ALDOC	aldolase C, fructose-bisphosphate [Source:HGNC Symbol;Acc:HGNC:418]	47.3225	102.116	68.4021	154.564
ENSG00000204371	EHMT2	euchromatic histone-lysine N-methyltransferase 2 [Source:HGNC Symbol;Acc:HGNC:14129]	47.3217	67.4521	71.774	47.9137
ENSG00000137216	TMEM63B	transmembrane protein 63B [Source:HGNC Symbol;Acc:HGNC:17735]	47.3213	93.5677	47.2264	47.857
ENSG00000115694	STK25	serine/threonine kinase 25 [Source:HGNC Symbol;Acc:HGNC:11404]	47.3164	64.4939	54.4968	43.3569
ENSG00000115758	ODC1	ornithine decarboxylase 1 [Source:HGNC Symbol;Acc:HGNC:8109]	47.3089	17.8012	43.3915	28.6109
ENSG00000108819	PPP1R9B	protein phosphatase 1, regulatory subunit 9B [Source:HGNC Symbol;Acc:HGNC:9298]	47.2833	102.521	68.839	43.7685
ENSG00000113387	SUB1	SUB1 homolog (S. cerevisiae) [Source:HGNC Symbol;Acc:HGNC:19985]	47.2074	74.3021	78.3515	52.1725
ENSG00000198918	RPL39	ribosomal protein L39 [Source:HGNC Symbol;Acc:HGNC:10350]	47.1934	191.943	266.518	239.469
ENSG00000147400	CETN2	centrin, EF-hand protein, 2 [Source:HGNC Symbol;Acc:HGNC:1867]	47.1744	34.3431	26.1148	26.6221
ENSG00000168003	SLC3A2	solute carrier family 3 (amino acid transporter heavy chain), member 2 [Source:HGNC Symbol;Acc:HGNC:11026]	47.1717	40.7165	28.3999	38.2586
ENSG00000221978	CCNL2	cyclin L2 [Source:HGNC Symbol;Acc:HGNC:20570]	47.17	24.4093	27.2448	34.8249
ENSG00000177879	AP3S1	adaptor-related protein complex 3, sigma 1 subunit [Source:HGNC Symbol;Acc:HGNC:2013]	47.0693	54.3763	44.7171	35.5628
ENSG00000174695	TMEM167A	transmembrane protein 167A [Source:HGNC Symbol;Acc:HGNC:28330]	47.0314	9.81343	12.4967	13.4934
ENSG00000147123	NDUFB11	NADH dehydrogenase (ubiquinone) 1 beta subcomplex, 11, 17.3kDa [Source:HGNC Symbol;Acc:HGNC:20372]	47.0052	75.9076	61.0409	63.9021
ENSG00000141698	NT5C3B	5'-nucleotidase, cytosolic IIIB [Source:HGNC Symbol;Acc:HGNC:28300]	46.9706	26.7896	24.4646	26.1441
ENSG00000116001	TIA1	TIA1 cytotoxic granule-associated RNA binding protein [Source:HGNC Symbol;Acc:HGNC:11802]	46.9493	27.3882	50.0887	28.5251
ENSG00000121390	PSPC1	paraspeckle component 1 [Source:HGNC Symbol;Acc:HGNC:20320]	46.9297	31.0399	28.6038	22.2807
ENSG00000119383	PPP2R4	protein phosphatase 2A activator, regulatory subunit 4 [Source:HGNC Symbol;Acc:HGNC:9308]	46.9283	36.3459	32.1927	40.8418
ENSG00000265972	TXNIP	thioredoxin interacting protein [Source:HGNC Symbol;Acc:HGNC:16952]	46.9225	4.3831	7.57807	89.145
ENSG00000065548	ZC3H15	zinc finger CCCH-type containing 15 [Source:HGNC Symbol;Acc:HGNC:29528]	46.8144	67.177	71.8238	60.5801
ENSG00000254377	MIR124-2HG	MIR124-2 host gene [Source:HGNC Symbol;Acc:HGNC:48723]	46.8142	15.4044	20.3685	16.7483
ENSG00000142459	EVI5L	ecotropic viral integration site 5-like [Source:HGNC Symbol;Acc:HGNC:30464]	46.8001	42.8569	40.806	32.2588
ENSG00000100321	SYNGR1	synaptogyrin 1 [Source:HGNC Symbol;Acc:HGNC:11498]	46.7547	114.316	33.5197	49.1492
ENSG00000125821	DTD1	D-tyrosyl-tRNA deacylase 1 [Source:HGNC Symbol;Acc:HGNC:16219]	46.7477	25.5069	18.3839	26.8052
ENSG00000140990	NDUFB10	NADH dehydrogenase (ubiquinone) 1 beta subcomplex, 10, 22kDa [Source:HGNC Symbol;Acc:HGNC:7696]	46.7216	74.133	61.2855	62.1365
ENSG00000108312	UBTF	upstream binding transcription factor, RNA polymerase I [Source:HGNC Symbol;Acc:HGNC:12511]	46.7055	29.9709	37.7504	32.9
ENSG00000182287	AP1S2	adaptor-related protein complex 1, sigma 2 subunit [Source:HGNC Symbol;Acc:HGNC:560]	46.6576	17.2871	23.2957	30.0606
ENSG00000130511	SSBP4	single stranded DNA binding protein 4 [Source:HGNC Symbol;Acc:HGNC:15676]	46.6522	74.1136	23.4774	33.8782
ENSG00000100991	TRPC4AP	transient receptor potential cation channel, subfamily C, member 4 associated protein [Source:HGNC Symbol;Acc:HGNC:16181]	46.6312	51.0105	43.3833	55.2972
ENSG00000151502	VPS26B	VPS26 retromer complex component B [Source:HGNC Symbol;Acc:HGNC:28119]	46.5368	27.154	25.7529	26.8361
ENSG00000112245	PTP4A1	protein tyrosine phosphatase type IVA, member 1 [Source:HGNC Symbol;Acc:HGNC:9634]	46.494	17.1187	26.0503	15.3452
ENSG00000177889	UBE2N	ubiquitin-conjugating enzyme E2N [Source:HGNC Symbol;Acc:HGNC:12492]	46.3692	38.5522	33.4839	39.8202
ENSG00000126351	THRA	thyroid hormone receptor, alpha [Source:HGNC Symbol;Acc:HGNC:11796]	46.3526	548.021	305.031	148.207
ENSG00000074071	MRPS34	mitochondrial ribosomal protein S34 [Source:HGNC Symbol;Acc:HGNC:16618]	46.2846	5.82606	0.732523	2.22504
ENSG00000041982	TNC	tenascin C [Source:HGNC Symbol;Acc:HGNC:5318]	46.2799	10.3352	62.605	32.7842
ENSG00000115216	NRBP1	nuclear receptor binding protein 1 [Source:HGNC Symbol;Acc:HGNC:7993]	46.2562	35.0691	51.3936	56.8539
ENSG00000159692	CTBP1	C-terminal binding protein 1 [Source:HGNC Symbol;Acc:HGNC:2494]	46.1714	63.7651	68.7018	60.4507
ENSG00000132153	DHX30	DEAH (Asp-Glu-Ala-His) box helicase 30 [Source:HGNC Symbol;Acc:HGNC:16716]	46.0871	29.6798	39.9569	27.983
ENSG00000087470	DNM1L	dynamin 1-like [Source:HGNC Symbol;Acc:HGNC:2973]	46.0823	67.0018	59.7512	60.1442
ENSG00000116521	SCAMP3	secretory carrier membrane protein 3 [Source:HGNC Symbol;Acc:HGNC:10565]	46.0721	35.0473	16.57	36.6722
ENSG00000134294	SLC38A2	solute carrier family 38, member 2 [Source:HGNC Symbol;Acc:HGNC:13448]	46.0665	34.6252	52.7218	48.5124
ENSG00000124214	STAU1	staufen double-stranded RNA binding protein 1 [Source:HGNC Symbol;Acc:HGNC:11370]	46.0628	29.1908	30.0641	30.7943
ENSG00000131495	NDUFA2	NADH dehydrogenase (ubiquinone) 1 alpha subcomplex, 2, 8kDa [Source:HGNC Symbol;Acc:HGNC:7685]	46.0589	73.0003	71.2905	57.243
ENSG00000148362	C9orf142	chromosome 9 open reading frame 142 [Source:HGNC Symbol;Acc:HGNC:27849]	46.0431	33.3057	26.9454	23.9133
ENSG00000104723	TUSC3	tumor suppressor candidate 3 [Source:HGNC Symbol;Acc:HGNC:30242]	46.0239	177.994	110.832	141.485
ENSG00000138650	PCDH10	protocadherin 10 [Source:HGNC Symbol;Acc:HGNC:13404]	46.0133	28.1005	28.7874	35.8287
ENSG00000163399	ATP1A1	ATPase, Na+/K+ transporting, alpha 1 polypeptide [Source:HGNC Symbol;Acc:HGNC:799]	45.9147	140.478	60.232	112.396
ENSG00000166582	CENPV	centromere protein V [Source:HGNC Symbol;Acc:HGNC:29920]	45.9009	21.269	36.7676	10.4503
ENSG00000104824	HNRNPL	heterogeneous nuclear ribonucleoprotein L [Source:HGNC Symbol;Acc:HGNC:5045]	45.8726	81.8932	116.87	69.2576
ENSG00000130787	HIP1R	huntingtin interacting protein 1 related [Source:HGNC Symbol;Acc:HGNC:18415]	45.8714	18.8338	12.9179	6.56926
ENSG00000014216	CAPN1	calpain 1, (mu/I) large subunit [Source:HGNC Symbol;Acc:HGNC:1476]	45.858	4.2556	1.40401	18.849
ENSG00000013306	SLC25A39	solute carrier family 25, member 39 [Source:HGNC Symbol;Acc:HGNC:24279]	45.7893	40.3075	29.7547	58.4969
ENSG00000138801	PAPSS1	3'-phosphoadenosine 5'-phosphosulfate synthase 1 [Source:HGNC Symbol;Acc:HGNC:8603]	45.7595	37.7745	52.1538	37.7995
ENSG00000109606	DHX15	DEAH (Asp-Glu-Ala-His) box helicase 15 [Source:HGNC Symbol;Acc:HGNC:2738]	45.7455	43.7511	84.8768	54.7906
ENSG00000185825	BCAP31	B-cell receptor-associated protein 31 [Source:HGNC Symbol;Acc:HGNC:16695]	45.6627	39.685	36.5665	64.5927
ENSG00000125651	GTF2F1	general transcription factor IIF, polypeptide 1, 74kDa [Source:HGNC Symbol;Acc:HGNC:4652]	45.5545	31.2845	42.585	26.9756
ENSG00000186591	UBE2H	ubiquitin-conjugating enzyme E2H [Source:HGNC Symbol;Acc:HGNC:12484]	45.5508	23.0253	27.4631	30.6616
ENSG00000179431	FJX1	four jointed box 1 [Source:HGNC Symbol;Acc:HGNC:17166]	45.506	38.95	19.1107	14.6383
ENSG00000115738	ID2	inhibitor of DNA binding 2, dominant negative helix-loop-helix protein [Source:HGNC Symbol;Acc:HGNC:5361]	45.4678	107.2	115.865	86.2336
ENSG00000116350	SRSF4	serine/arginine-rich splicing factor 4 [Source:HGNC Symbol;Acc:HGNC:10786]	45.426	8.53351	5.98978	7.20601
ENSG00000149313	AASDHPPT	aminoadipate-semialdehyde dehydrogenase-phosphopantetheinyl transferase [Source:HGNC Symbol;Acc:HGNC:14235]	45.3837	9.45421	12.9849	12.0074
ENSG00000141504	SAT2	spermidine/spermine N1-acetyltransferase family member 2 [Source:HGNC Symbol;Acc:HGNC:23160]	45.3593	5.10106	5.94447	7.3167
ENSG00000177432	NAP1L5	nucleosome assembly protein 1-like 5 [Source:HGNC Symbol;Acc:HGNC:19968]	45.3554	65.2661	21.1503	107.299
ENSG00000155304	HSPA13	heat shock protein 70kDa family, member 13 [Source:HGNC Symbol;Acc:HGNC:11375]	45.3265	18.5674	26.2331	26.17
ENSG00000126934	MAP2K2	mitogen-activated protein kinase kinase 2 [Source:HGNC Symbol;Acc:HGNC:6842]	45.3078	51.7779	41.4298	39.6324
ENSG00000102606	ARHGEF7	Rho guanine nucleotide exchange factor (GEF) 7 [Source:HGNC Symbol;Acc:HGNC:15607]	45.2564	55.8746	55.5752	39.2499
ENSG00000018625	ATP1A2	ATPase, Na+/K+ transporting, alpha 2 polypeptide [Source:HGNC Symbol;Acc:HGNC:800]	45.2528	35.7614	31.3763	58.246
ENSG00000164176	EDIL3	EGF-like repeats and discoidin I-like domains 3 [Source:HGNC Symbol;Acc:HGNC:3173]	45.2335	19.4329	16.302	29.6715
ENSG00000172428	MYEOV2	myeloma overexpressed 2 [Source:HGNC Symbol;Acc:HGNC:21314]	45.2184	73.288	81.0073	56.832
ENSG00000175216	CKAP5	cytoskeleton associated protein 5 [Source:HGNC Symbol;Acc:HGNC:28959]	45.1825	36.58	63.8198	41.1456
ENSG00000124172	ATP5E	ATP synthase, H+ transporting, mitochondrial F1 complex, epsilon subunit [Source:HGNC Symbol;Acc:HGNC:838]	45.1553	50.3462	43.7138	36.607
ENSG00000196531	NACA	nascent polypeptide-associated complex alpha subunit [Source:HGNC Symbol;Acc:HGNC:7629]	45.1097	22.9321	43.0604	33.5996
ENSG00000131143	COX4I1	cytochrome c oxidase subunit IV isoform 1 [Source:HGNC Symbol;Acc:HGNC:2265]	45.0982	347.97	336.121	289.224
ENSG00000172775	FAM192A	family with sequence similarity 192, member A [Source:HGNC Symbol;Acc:HGNC:29856]	45.0698	24.4211	29.8998	27.345
ENSG00000008838	MED24	mediator complex subunit 24 [Source:HGNC Symbol;Acc:HGNC:22963]	45.0647	21.5084	21.033	20.7823
ENSG00000197728	RPS26	ribosomal protein S26 [Source:HGNC Symbol;Acc:HGNC:10414]	45.0536	297.859	467.213	406.865
ENSG00000150753	CCT5	chaperonin containing TCP1, subunit 5 (epsilon) [Source:HGNC Symbol;Acc:HGNC:1618]	45.0422	108.336	188.846	168.416
ENSG00000156587	UBE2L6	ubiquitin-conjugating enzyme E2L 6 [Source:HGNC Symbol;Acc:HGNC:12490]	45.0118	2.74569	2.12093	6.19934
ENSG00000198914	POU3F3	POU class 3 homeobox 3 [Source:HGNC Symbol;Acc:HGNC:9216]	45.0009	26.9406	38.0453	8.81297
ENSG00000136240	KDELR2	KDEL (Lys-Asp-Glu-Leu) endoplasmic reticulum protein retention receptor 2 [Source:HGNC Symbol;Acc:HGNC:6305]	44.9828	18.6816	34.6487	64.7065
ENSG00000172301	COPRS	coordinator of PRMT5, differentiation stimulator [Source:HGNC Symbol;Acc:HGNC:28848]	44.957	27.9678	24.8609	32.4023
ENSG00000101439	CST3	cystatin C [Source:HGNC Symbol;Acc:HGNC:2475]	44.9482	641.376	366.832	256.643
ENSG00000134779	TPGS2	tubulin polyglutamylase complex subunit 2 [Source:HGNC Symbol;Acc:HGNC:24561]	44.9449	16.914	18.0316	24.9466
ENSG00000135390	ATP5G2	ATP synthase, H+ transporting, mitochondrial Fo complex, subunit C2 (subunit 9) [Source:HGNC Symbol;Acc:HGNC:842]	44.9441	56.8686	80.5298	68.0334
ENSG00000115073	ACTR1B	ARP1 actin-related protein 1 homolog B, centractin beta (yeast) [Source:HGNC Symbol;Acc:HGNC:168]	44.9365	68.7624	41.6402	48.9782
ENSG00000129946	SHC2	SHC (Src homology 2 domain containing) transforming protein 2 [Source:HGNC Symbol;Acc:HGNC:29869]	44.9169	17.5286	12.6851	22.2133
ENSG00000135924	DNAJB2	DnaJ (Hsp40) homolog, subfamily B, member 2 [Source:HGNC Symbol;Acc:HGNC:5228]	44.8715	16.1566	9.37271	22.7765
ENSG00000170017	ALCAM	activated leukocyte cell adhesion molecule [Source:HGNC Symbol;Acc:HGNC:400]	44.7949	18.84	28.7145	36.8175
ENSG00000183291	2015-09-01	15 kDa selenoprotein [Source:EntrezGene;Acc:9403]	44.7781	64.4927	62.3297	76.0608
ENSG00000213639	PPP1CB	protein phosphatase 1, catalytic subunit, beta isozyme [Source:HGNC Symbol;Acc:HGNC:9282]	44.7629	51.6858	59.0875	50.4009
ENSG00000125814	NAPB	N-ethylmaleimide-sensitive factor attachment protein, beta [Source:HGNC Symbol;Acc:HGNC:15751]	44.7029	93.1479	54.0945	60.3897
ENSG00000139200	PIANP	PILR alpha associated neural protein [Source:HGNC Symbol;Acc:HGNC:25338]	44.69	36.4856	5.16105	23.2882
ENSG00000080845	DLGAP4	discs, large (Drosophila) homolog-associated protein 4 [Source:HGNC Symbol;Acc:HGNC:24476]	44.6786	73.3213	38.5216	31.9918
ENSG00000163930	BAP1	BRCA1 associated protein-1 (ubiquitin carboxy-terminal hydrolase) [Source:HGNC Symbol;Acc:HGNC:950]	44.6704	43.1775	41.912	32.4335
ENSG00000085733	CTTN	cortactin [Source:HGNC Symbol;Acc:HGNC:3338]	44.6598	67.2399	56.3812	72.5354
ENSG00000120251	GRIA2	glutamate receptor, ionotropic, AMPA 2 [Source:HGNC Symbol;Acc:HGNC:4572]	44.6307	66.7246	67.6375	18.2548
ENSG00000124762	CDKN1A	cyclin-dependent kinase inhibitor 1A (p21, Cip1) [Source:HGNC Symbol;Acc:HGNC:1784]	44.6098	40.8763	4.59022	84.1111
ENSG00000047249	ATP6V1H	ATPase, H+ transporting, lysosomal 50/57kDa, V1 subunit H [Source:HGNC Symbol;Acc:HGNC:18303]	44.6098	34.0391	29.5737	24.4331
ENSG00000002834	LASP1	LIM and SH3 protein 1 [Source:HGNC Symbol;Acc:HGNC:6513]	44.6094	68.346	52.1837	78.1599
ENSG00000137168	PPIL1	peptidylprolyl isomerase (cyclophilin)-like 1 [Source:HGNC Symbol;Acc:HGNC:9260]	44.536	19.633	31.0631	16.8512
ENSG00000110925	CSRNP2	cysteine-serine-rich nuclear protein 2 [Source:HGNC Symbol;Acc:HGNC:16006]	44.5256	12.6438	27.747	11.7701
ENSG00000145919	BOD1	biorientation of chromosomes in cell division 1 [Source:HGNC Symbol;Acc:HGNC:25114]	44.496	47.625	63.2443	46.1283
ENSG00000158856	DMTN	dematin actin binding protein [Source:HGNC Symbol;Acc:HGNC:3382]	44.4854	60.5232	18.3903	18.306
ENSG00000159842	ABR	active BCR-related [Source:HGNC Symbol;Acc:HGNC:81]	44.4817	75.4982	80.9361	45.1001
ENSG00000135472	FAIM2	Fas apoptotic inhibitory molecule 2 [Source:HGNC Symbol;Acc:HGNC:17067]	44.4482	24.3613	5.36887	14.4764
ENSG00000148337	CIZ1	CDKN1A interacting zinc finger protein 1 [Source:HGNC Symbol;Acc:HGNC:16744]	44.4304	12.626	13.9368	11.2389
ENSG00000121753	ADGRB2	adhesion G protein-coupled receptor B2 [Source:HGNC Symbol;Acc:HGNC:944]	44.3834	61.5561	35.5758	31.8323
ENSG00000068697	LAPTM4A	lysosomal protein transmembrane 4 alpha [Source:HGNC Symbol;Acc:HGNC:6924]	44.3505	125.038	129.273	257.637
ENSG00000120053	GOT1	glutamic-oxaloacetic transaminase 1, soluble [Source:HGNC Symbol;Acc:HGNC:4432]	44.3291	58.4793	25.358	48.073
ENSG00000116675	DNAJC6	DnaJ (Hsp40) homolog, subfamily C, member 6 [Source:HGNC Symbol;Acc:HGNC:15469]	44.2697	49.5429	36.8832	37.1856
ENSG00000100567	PSMA3	proteasome (prosome, macropain) subunit, alpha type, 3 [Source:HGNC Symbol;Acc:HGNC:9532]	44.2402	41.3145	59.2695	41.1569
ENSG00000138385	SSB	Sjogren syndrome antigen B (autoantigen La) [Source:HGNC Symbol;Acc:HGNC:11316]	44.2359	62.5951	77.2797	73.7937
ENSG00000100348	TXN2	thioredoxin 2 [Source:HGNC Symbol;Acc:HGNC:17772]	44.2262	35.0806	22.1114	40.561
ENSG00000122545	2007-09-01	septin 7 [Source:HGNC Symbol;Acc:HGNC:1717]	44.177	110.912	118.125	97.519
ENSG00000130723	PRRC2B	proline-rich coiled-coil 2B [Source:HGNC Symbol;Acc:HGNC:28121]	44.1555	67.9359	55.4742	61.1013
ENSG00000184983	NDUFA6	NADH dehydrogenase (ubiquinone) 1 alpha subcomplex, 6, 14kDa [Source:HGNC Symbol;Acc:HGNC:7690]	44.151	105.785	90.4288	84.6186
ENSG00000111237	VPS29	VPS29 retromer complex component [Source:HGNC Symbol;Acc:HGNC:14340]	44.1365	41.4734	27.1739	26.9534
ENSG00000135069	PSAT1	phosphoserine aminotransferase 1 [Source:HGNC Symbol;Acc:HGNC:19129]	44.0174	37.134	56.0167	54.7604
ENSG00000172239	PAIP1	poly(A) binding protein interacting protein 1 [Source:HGNC Symbol;Acc:HGNC:16945]	44.015	33.7277	55.265	44.4339
ENSG00000103275	UBE2I	ubiquitin-conjugating enzyme E2I [Source:HGNC Symbol;Acc:HGNC:12485]	44.0093	33.2928	55.8469	36.9112
ENSG00000128654	MTX2	metaxin 2 [Source:HGNC Symbol;Acc:HGNC:7506]	43.9723	18.6222	17.2367	21.5539
ENSG00000128989	ARPP19	cAMP-regulated phosphoprotein, 19kDa [Source:HGNC Symbol;Acc:HGNC:16967]	43.9556	45.2838	45.2661	44.1443
ENSG00000149532	CPSF7	cleavage and polyadenylation specific factor 7, 59kDa [Source:HGNC Symbol;Acc:HGNC:30098]	43.9411	24.2844	24.2968	28.3505
ENSG00000130706	ADRM1	adhesion regulating molecule 1 [Source:HGNC Symbol;Acc:HGNC:15759]	43.9344	18.409	13.175	13.0366
ENSG00000071894	CPSF1	cleavage and polyadenylation specific factor 1, 160kDa [Source:HGNC Symbol;Acc:HGNC:2324]	43.9281	18.7626	22.9516	18.4898
ENSG00000164548	TRA2A	transformer 2 alpha homolog (Drosophila) [Source:HGNC Symbol;Acc:HGNC:16645]	43.9271	22.154	32.2236	22.9204
ENSG00000138668	HNRNPD	heterogeneous nuclear ribonucleoprotein D (AU-rich element RNA binding protein 1, 37kDa) [Source:HGNC Symbol;Acc:HGNC:5036]	43.924	28.0881	13.4957	33.2567
ENSG00000132912	DCTN4	dynactin 4 (p62) [Source:HGNC Symbol;Acc:HGNC:15518]	43.861	31.4963	48.5385	34.4161
ENSG00000165672	PRDX3	peroxiredoxin 3 [Source:HGNC Symbol;Acc:HGNC:9354]	43.7899	45.0437	34.3353	44.5195
ENSG00000174672	BRSK2	BR serine/threonine kinase 2 [Source:HGNC Symbol;Acc:HGNC:11405]	43.7725	52.4449	41.0939	24.689
ENSG00000085433	WDR47	WD repeat domain 47 [Source:HGNC Symbol;Acc:HGNC:29141]	43.753	60.8723	61.3312	31.6951
ENSG00000161547	SRSF2	serine/arginine-rich splicing factor 2 [Source:HGNC Symbol;Acc:HGNC:10783]	43.7438	83.7831	66.9164	76.1444
ENSG00000106236	NPTX2	neuronal pentraxin II [Source:HGNC Symbol;Acc:HGNC:7953]	43.7084	7.25468	1.74263	5.43787
ENSG00000119318	RAD23B	RAD23 homolog B, nucleotide excision repair protein [Source:HGNC Symbol;Acc:HGNC:9813]	43.6747	72.2622	81.4795	62.5718
ENSG00000125995	ROMO1	reactive oxygen species modulator 1 [Source:HGNC Symbol;Acc:HGNC:16185]	43.6701	69.8751	45.1242	43.893
ENSG00000209082	MT-TL1	mitochondrially encoded tRNA leucine 1 (UUA/G) [Source:HGNC Symbol;Acc:HGNC:7490]	43.6624	22.6886	7.74917	35.6012
ENSG00000130822	PNCK	pregnancy up-regulated nonubiquitous CaM kinase [Source:HGNC Symbol;Acc:HGNC:13415]	43.6542	70.2974	42.0887	35.2903
ENSG00000171224	C10orf35	chromosome 10 open reading frame 35 [Source:HGNC Symbol;Acc:HGNC:23519]	43.6428	22.592	19.6485	13.1079
ENSG00000225663	FAM195B	family with sequence similarity 195, member B [Source:HGNC Symbol;Acc:HGNC:28007]	43.6072	72.1063	46.5182	68.9181
ENSG00000109736	MFSD10	major facilitator superfamily domain containing 10 [Source:HGNC Symbol;Acc:HGNC:16894]	43.5875	10.1299	9.5306	14.0388
ENSG00000070669	ASNS	asparagine synthetase (glutamine-hydrolyzing) [Source:HGNC Symbol;Acc:HGNC:753]	43.5395	52.0491	40.7658	40.1674
ENSG00000163382	APOA1BP	apolipoprotein A-I binding protein [Source:HGNC Symbol;Acc:HGNC:18453]	43.5276	31.1894	39.288	48.1476
ENSG00000077264	PAK3	p21 protein (Cdc42/Rac)-activated kinase 3 [Source:HGNC Symbol;Acc:HGNC:8592]	43.513	24.1613	38.3818	32.7855
ENSG00000173692	PSMD1	proteasome (prosome, macropain) 26S subunit, non-ATPase, 1 [Source:HGNC Symbol;Acc:HGNC:9554]	43.5018	50.5163	59.5257	63.94
ENSG00000141030	COPS3	COP9 signalosome subunit 3 [Source:HGNC Symbol;Acc:HGNC:2239]	43.4567	26.1591	38.7865	36.7204
ENSG00000116133	DHCR24	24-dehydrocholesterol reductase [Source:HGNC Symbol;Acc:HGNC:2859]	43.4493	56.2848	27.6779	37.5107
ENSG00000185359	HGS	hepatocyte growth factor-regulated tyrosine kinase substrate [Source:HGNC Symbol;Acc:HGNC:4897]	43.4396	37.1528	35.0988	34.7175
ENSG00000120694	HSPH1	heat shock 105kDa/110kDa protein 1 [Source:HGNC Symbol;Acc:HGNC:16969]	43.4277	47.9718	22.4621	28.1558
ENSG00000100241	SBF1	SET binding factor 1 [Source:HGNC Symbol;Acc:HGNC:10542]	43.3967	37.476	40.3404	27.5277
ENSG00000102401	ARMCX3	armadillo repeat containing, X-linked 3 [Source:HGNC Symbol;Acc:HGNC:24065]	43.365	11.8027	15.1628	13.4334
ENSG00000126947	ARMCX1	armadillo repeat containing, X-linked 1 [Source:HGNC Symbol;Acc:HGNC:18073]	43.3085	34.0478	24.0953	40.1416
ENSG00000136717	BIN1	bridging integrator 1 [Source:HGNC Symbol;Acc:HGNC:1052]	43.3061	94.5515	47.887	45.3994
ENSG00000070413	DGCR2	DiGeorge syndrome critical region gene 2 [Source:HGNC Symbol;Acc:HGNC:2845]	43.2937	21.4479	20.6523	24.5027
ENSG00000008018	PSMB1	proteasome (prosome, macropain) subunit, beta type, 1 [Source:HGNC Symbol;Acc:HGNC:9537]	43.2491	133.649	153.792	127.168
ENSG00000124006	OBSL1	obscurin-like 1 [Source:HGNC Symbol;Acc:HGNC:29092]	43.2396	9.32755	7.41912	12.5196
ENSG00000090971	NAT14	N-acetyltransferase 14 (GCN5-related, putative) [Source:HGNC Symbol;Acc:HGNC:28918]	43.2373	28.1606	9.84658	8.05771
ENSG00000066032	CTNNA2	catenin (cadherin-associated protein), alpha 2 [Source:HGNC Symbol;Acc:HGNC:2510]	43.2126	51.338	69.5236	57.4018
ENSG00000173264	GPR137	G protein-coupled receptor 137 [Source:HGNC Symbol;Acc:HGNC:24300]	43.1926	40.2194	16.487	25.8004
ENSG00000122126	OCRL	oculocerebrorenal syndrome of Lowe [Source:HGNC Symbol;Acc:HGNC:8108]	43.1675	11.9734	9.47586	20.7958
ENSG00000179314	WSCD1	WSC domain containing 1 [Source:HGNC Symbol;Acc:HGNC:29060]	43.1648	19.6246	28.9678	23.9175
ENSG00000145495	2006-03-01	membrane-associated ring finger (C3HC4) 6, E3 ubiquitin protein ligase [Source:HGNC Symbol;Acc:HGNC:30550]	43.1589	62.4587	64.1158	65.9749
ENSG00000145632	PLK2	polo-like kinase 2 [Source:HGNC Symbol;Acc:HGNC:19699]	43.1434	60.9312	113.802	41.0644
ENSG00000142599	RERE	arginine-glutamic acid dipeptide (RE) repeats [Source:HGNC Symbol;Acc:HGNC:9965]	43.1362	17.8268	9.32349	25.9452
ENSG00000138758	2011-09-01	septin 11 [Source:HGNC Symbol;Acc:HGNC:25589]	43.1005	37.4567	47.6187	54.1292
ENSG00000115541	HSPE1	heat shock 10kDa protein 1 [Source:HGNC Symbol;Acc:HGNC:5269]	43.0752	55.1656	73.3279	55.2163
ENSG00000114686	MRPL3	mitochondrial ribosomal protein L3 [Source:HGNC Symbol;Acc:HGNC:10379]	43.0587	13.7138	14.1939	12.9545
ENSG00000109919	MTCH2	mitochondrial carrier 2 [Source:HGNC Symbol;Acc:HGNC:17587]	43.0233	40.1339	39.9293	41.8802
ENSG00000111786	SRSF9	serine/arginine-rich splicing factor 9 [Source:HGNC Symbol;Acc:HGNC:10791]	43.0154	37.6786	35.6838	33.0175
ENSG00000140632	GLYR1	glyoxylate reductase 1 homolog (Arabidopsis) [Source:HGNC Symbol;Acc:HGNC:24434]	42.9819	73.3177	68.6943	65.8831
ENSG00000164111	ANXA5	annexin A5 [Source:HGNC Symbol;Acc:HGNC:543]	42.9603	21.0018	28.7907	73.3835
ENSG00000159140	SON	SON DNA binding protein [Source:HGNC Symbol;Acc:HGNC:11183]	42.9346	39.3426	66.5105	48.8478
ENSG00000154146	NRGN	neurogranin (protein kinase C substrate, RC3) [Source:HGNC Symbol;Acc:HGNC:8000]	42.9027	350.352	3.93594	3.19113
ENSG00000135932	CAB39	calcium binding protein 39 [Source:HGNC Symbol;Acc:HGNC:20292]	42.8964	59.5278	73.5296	50.693
ENSG00000169169	CPT1C	carnitine palmitoyltransferase 1C [Source:HGNC Symbol;Acc:HGNC:18540]	42.8953	31.4218	21.0011	31.3201
ENSG00000117461	PIK3R3	phosphoinositide-3-kinase, regulatory subunit 3 (gamma) [Source:HGNC Symbol;Acc:HGNC:8981]	42.8762	7.10272	16.7211	37.0467
ENSG00000065427	KARS	lysyl-tRNA synthetase [Source:HGNC Symbol;Acc:HGNC:6215]	42.8148	37.5803	58.3657	56.3265
ENSG00000099246	RAB18	RAB18, member RAS oncogene family [Source:HGNC Symbol;Acc:HGNC:14244]	42.8098	70.2301	36.1154	82.045
ENSG00000099804	CDC34	cell division cycle 34 [Source:HGNC Symbol;Acc:HGNC:1734]	42.7968	28.2746	20.1612	36.8928
ENSG00000104490	NCALD	neurocalcin delta [Source:HGNC Symbol;Acc:HGNC:7655]	42.7375	114.849	52.7756	46.7047
ENSG00000007520	TSR3	TSR3, 20S rRNA accumulation, homolog (S. cerevisiae) [Source:HGNC Symbol;Acc:HGNC:14175]	42.7322	20.2311	18.1664	19.0322
ENSG00000183978	COA3	cytochrome c oxidase assembly factor 3 [Source:HGNC Symbol;Acc:HGNC:24990]	42.7038	60.8903	53.2075	46.2758
ENSG00000197894	ADH5	alcohol dehydrogenase 5 (class III), chi polypeptide [Source:HGNC Symbol;Acc:HGNC:253]	42.6849	16.5829	28.6387	26.156
ENSG00000056097	ZFR	zinc finger RNA binding protein [Source:HGNC Symbol;Acc:HGNC:17277]	42.6577	59.8427	52.3507	59.3791
ENSG00000171159	C9orf16	chromosome 9 open reading frame 16 [Source:HGNC Symbol;Acc:HGNC:17823]	42.6541	18.1533	6.82938	10.2851
ENSG00000160271	RALGDS	ral guanine nucleotide dissociation stimulator [Source:HGNC Symbol;Acc:HGNC:9842]	42.6488	42.3555	41.0808	33.2917
ENSG00000175115	PACS1	phosphofurin acidic cluster sorting protein 1 [Source:HGNC Symbol;Acc:HGNC:30032]	42.6289	32.9403	13.286	32.1268
ENSG00000171148	TADA3	transcriptional adaptor 3 [Source:HGNC Symbol;Acc:HGNC:19422]	42.6116	20.452	17.1326	16.3673
ENSG00000156411	C14orf2	chromosome 14 open reading frame 2 [Source:HGNC Symbol;Acc:HGNC:1188]	42.6014	178.187	169.372	149.648
ENSG00000114520	SNX4	sorting nexin 4 [Source:HGNC Symbol;Acc:HGNC:11175]	42.5953	37.5721	41.1702	43.7902
ENSG00000105723	GSK3A	glycogen synthase kinase 3 alpha [Source:HGNC Symbol;Acc:HGNC:4616]	42.5605	96.7827	35.2475	57.5007
ENSG00000143222	UFC1	ubiquitin-fold modifier conjugating enzyme 1 [Source:HGNC Symbol;Acc:HGNC:26941]	42.5451	23.6306	26.3566	25.4117
ENSG00000177733	HNRNPA0	heterogeneous nuclear ribonucleoprotein A0 [Source:HGNC Symbol;Acc:HGNC:5030]	42.517	118.715	70.8431	71.0871
ENSG00000068366	ACSL4	acyl-CoA synthetase long-chain family member 4 [Source:HGNC Symbol;Acc:HGNC:3571]	42.4633	35.2101	14.7332	23.7145
ENSG00000100412	ACO2	aconitase 2, mitochondrial [Source:HGNC Symbol;Acc:HGNC:118]	42.4282	121.713	112.177	122.633
ENSG00000100227	POLDIP3	polymerase (DNA-directed), delta interacting protein 3 [Source:HGNC Symbol;Acc:HGNC:23782]	42.4055	23.0558	36.497	43.8789
ENSG00000169184	MN1	meningioma (disrupted in balanced translocation) 1 [Source:HGNC Symbol;Acc:HGNC:7180]	42.3737	10.8033	32.2597	7.43075
ENSG00000184588	PDE4B	phosphodiesterase 4B, cAMP-specific [Source:HGNC Symbol;Acc:HGNC:8781]	42.3624	13.1592	13.1511	11.3185
ENSG00000106665	CLIP2	CAP-GLY domain containing linker protein 2 [Source:HGNC Symbol;Acc:HGNC:2586]	42.3586	47.1115	61.7113	30.281
ENSG00000166448	TMEM130	transmembrane protein 130 [Source:HGNC Symbol;Acc:HGNC:25429]	42.3502	95.1975	45.3302	151.109
ENSG00000132963	POMP	proteasome maturation protein [Source:HGNC Symbol;Acc:HGNC:20330]	42.3429	22.2093	20.7436	20.6454
ENSG00000129244	ATP1B2	ATPase, Na+/K+ transporting, beta 2 polypeptide [Source:HGNC Symbol;Acc:HGNC:805]	42.3132	76.7248	3.82586	90.7124
ENSG00000099889	ARVCF	armadillo repeat gene deleted in velocardiofacial syndrome [Source:HGNC Symbol;Acc:HGNC:728]	42.2862	14.3027	24.8264	22.2894
ENSG00000047849	MAP4	microtubule-associated protein 4 [Source:HGNC Symbol;Acc:HGNC:6862]	42.2679	96.8512	65.2046	83.0552
ENSG00000136261	BZW2	basic leucine zipper and W2 domains 2 [Source:HGNC Symbol;Acc:HGNC:18808]	42.2053	104.609	178.853	74.6887
ENSG00000132434	LANCL2	LanC lantibiotic synthetase component C-like 2 (bacterial) [Source:HGNC Symbol;Acc:HGNC:6509]	42.1439	54.5749	58.2528	41.5896
ENSG00000134153	EMC7	ER membrane protein complex subunit 7 [Source:HGNC Symbol;Acc:HGNC:24301]	42.1018	14.9336	8.7643	16.9195
ENSG00000149179	C11orf49	chromosome 11 open reading frame 49 [Source:HGNC Symbol;Acc:HGNC:28720]	42.0984	24.0602	26.452	21.9324
ENSG00000140264	SERF2	small EDRK-rich factor 2 [Source:HGNC Symbol;Acc:HGNC:10757]	42.0882	20.9064	15.9418	22.368
ENSG00000065665	SEC61A2	Sec61 alpha 2 subunit (S. cerevisiae) [Source:HGNC Symbol;Acc:HGNC:17702]	42.0569	28.8167	23.1311	23.7422
ENSG00000085365	SCAMP1	secretory carrier membrane protein 1 [Source:HGNC Symbol;Acc:HGNC:10563]	42.0261	63.833	41.7864	58.8871
ENSG00000100813	ACIN1	apoptotic chromatin condensation inducer 1 [Source:HGNC Symbol;Acc:HGNC:17066]	42.0217	28.4699	44.9589	32.7802
ENSG00000196576	PLXNB2	plexin B2 [Source:HGNC Symbol;Acc:HGNC:9104]	42.0166	17.4698	38.5944	42.4956
ENSG00000182004	SNRPE	small nuclear ribonucleoprotein polypeptide E [Source:HGNC Symbol;Acc:HGNC:11161]	41.9996	33.8371	75.1967	52.3952
ENSG00000007392	LUC7L	LUC7-like [Source:HGNC Symbol;Acc:HGNC:6723]	41.9894	25.6058	43.6137	30.687
ENSG00000179604	CDC42EP4	CDC42 effector protein (Rho GTPase binding) 4 [Source:HGNC Symbol;Acc:HGNC:17147]	41.9838	19.0098	30.6028	21.6011
ENSG00000170606	HSPA4	heat shock 70kDa protein 4 [Source:HGNC Symbol;Acc:HGNC:5237]	41.8793	82.4138	92.5209	78.979
ENSG00000125835	SNRPB	small nuclear ribonucleoprotein polypeptides B and B1 [Source:HGNC Symbol;Acc:HGNC:11153]	41.878	48.594	54.106	48.1635
ENSG00000198858	R3HDM4	R3H domain containing 4 [Source:HGNC Symbol;Acc:HGNC:28270]	41.8491	105.934	43.167	39.4118
ENSG00000174903	RAB1B	RAB1B, member RAS oncogene family [Source:HGNC Symbol;Acc:HGNC:18370]	41.8132	81.9121	53.1207	61.0948
ENSG00000011332	DPF1	D4, zinc and double PHD fingers family 1 [Source:HGNC Symbol;Acc:HGNC:20225]	41.7909	37.6195	45.1671	12.5311
ENSG00000179115	FARSA	phenylalanyl-tRNA synthetase, alpha subunit [Source:HGNC Symbol;Acc:HGNC:3592]	41.7713	26.0215	25.3101	18.2731
ENSG00000108389	MTMR4	myotubularin related protein 4 [Source:HGNC Symbol;Acc:HGNC:7452]	41.747	24.2669	33.3028	24.4707
ENSG00000149182	ARFGAP2	ADP-ribosylation factor GTPase activating protein 2 [Source:HGNC Symbol;Acc:HGNC:13504]	41.7198	9.82438	10.0243	12.9525
ENSG00000102030	NAA10	N(alpha)-acetyltransferase 10, NatA catalytic subunit [Source:HGNC Symbol;Acc:HGNC:18704]	41.706	5.91377	8.40294	7.76646
ENSG00000101337	TM9SF4	transmembrane 9 superfamily protein member 4 [Source:HGNC Symbol;Acc:HGNC:30797]	41.6664	29.0596	20.4422	35.6152
ENSG00000147533	GOLGA7	golgin A7 [Source:HGNC Symbol;Acc:HGNC:24876]	41.6542	35.8479	39.7799	44.1686
ENSG00000074657	ZNF532	zinc finger protein 532 [Source:HGNC Symbol;Acc:HGNC:30940]	41.6482	14.9311	28.5025	16.7835
ENSG00000135506	OS9	osteosarcoma amplified 9, endoplasmic reticulum lectin [Source:HGNC Symbol;Acc:HGNC:16994]	41.6453	41.3853	35.1552	38.2409
ENSG00000167770	OTUB1	OTU deubiquitinase, ubiquitin aldehyde binding 1 [Source:HGNC Symbol;Acc:HGNC:23077]	41.6217	85.3467	80.1334	66.151
ENSG00000160752	FDPS	farnesyl diphosphate synthase [Source:HGNC Symbol;Acc:HGNC:3631]	41.5965	20.8276	14.8679	18.8703
ENSG00000125170	DOK4	docking protein 4 [Source:HGNC Symbol;Acc:HGNC:19868]	41.5676	66.0306	51.3424	16.0481
ENSG00000138078	PREPL	prolyl endopeptidase-like [Source:HGNC Symbol;Acc:HGNC:30228]	41.5408	83.0096	32.388	75.1743
ENSG00000123240	OPTN	optineurin [Source:HGNC Symbol;Acc:HGNC:17142]	41.5263	7.0068	7.75384	11.2281
ENSG00000147684	NDUFB9	NADH dehydrogenase (ubiquinone) 1 beta subcomplex, 9, 22kDa [Source:HGNC Symbol;Acc:HGNC:7704]	41.495	146.721	121.417	102.287
ENSG00000132424	PNISR	PNN-interacting serine/arginine-rich protein [Source:HGNC Symbol;Acc:HGNC:21222]	41.4856	40.038	52.2944	32.9045
ENSG00000141127	PRPSAP2	phosphoribosyl pyrophosphate synthetase-associated protein 2 [Source:HGNC Symbol;Acc:HGNC:9467]	41.4694	16.9591	26.1728	18.4576
ENSG00000115241	PPM1G	protein phosphatase, Mg2+/Mn2+ dependent, 1G [Source:HGNC Symbol;Acc:HGNC:9278]	41.4665	63.5611	62.5878	67.7711
ENSG00000116459	ATP5F1	ATP synthase, H+ transporting, mitochondrial Fo complex, subunit B1 [Source:HGNC Symbol;Acc:HGNC:840]	41.4094	85.2648	89.6986	83.6782
ENSG00000130881	LRP3	low density lipoprotein receptor-related protein 3 [Source:HGNC Symbol;Acc:HGNC:6695]	41.3864	33.571	25.0237	21.3741
ENSG00000167702	KIFC2	kinesin family member C2 [Source:HGNC Symbol;Acc:HGNC:29530]	41.3517	89.4132	20.7029	33.4128
ENSG00000128683	GAD1	glutamate decarboxylase 1 (brain, 67kDa) [Source:HGNC Symbol;Acc:HGNC:4092]	41.3433	134.944	55.1319	22.156
ENSG00000104381	GDAP1	ganglioside induced differentiation associated protein 1 [Source:HGNC Symbol;Acc:HGNC:15968]	41.3402	50.6592	48.9981	29.8293
ENSG00000188636	LDOC1L	leucine zipper, down-regulated in cancer 1-like [Source:HGNC Symbol;Acc:HGNC:13343]	41.3313	22.9728	21.5914	15.3123
ENSG00000089351	GRAMD1A	GRAM domain containing 1A [Source:HGNC Symbol;Acc:HGNC:29305]	41.3013	73.0834	87.7239	35.6832
ENSG00000127948	POR	P450 (cytochrome) oxidoreductase [Source:HGNC Symbol;Acc:HGNC:9208]	41.3005	38.9514	32.5176	37.0346
ENSG00000144566	RAB5A	RAB5A, member RAS oncogene family [Source:HGNC Symbol;Acc:HGNC:9783]	41.2806	46.2934	38.7492	43.1017
ENSG00000143799	PARP1	poly (ADP-ribose) polymerase 1 [Source:HGNC Symbol;Acc:HGNC:270]	41.2551	27.8911	52.8742	28.9713
ENSG00000169258	GPRIN1	G protein regulated inducer of neurite outgrowth 1 [Source:HGNC Symbol;Acc:HGNC:24835]	41.2421	94.077	76.0268	39.2798
ENSG00000125505	MBOAT7	membrane bound O-acyltransferase domain containing 7 [Source:HGNC Symbol;Acc:HGNC:15505]	41.2338	41.0401	17.5374	48.4807
ENSG00000144749	LRIG1	leucine-rich repeats and immunoglobulin-like domains 1 [Source:HGNC Symbol;Acc:HGNC:17360]	41.208	9.3526	13.874	36.223
ENSG00000155115	GTF3C6	general transcription factor IIIC, polypeptide 6, alpha 35kDa [Source:HGNC Symbol;Acc:HGNC:20872]	41.1784	15.0915	22.5277	25.162
ENSG00000029725	RABEP1	rabaptin, RAB GTPase binding effector protein 1 [Source:HGNC Symbol;Acc:HGNC:17677]	41.1289	33.408	56.6474	35.306
ENSG00000100442	FKBP3	FK506 binding protein 3, 25kDa [Source:HGNC Symbol;Acc:HGNC:3719]	41.0973	87.602	64.7899	91.4842
ENSG00000049449	RCN1	reticulocalbin 1, EF-hand calcium binding domain [Source:HGNC Symbol;Acc:HGNC:9934]	41.0372	16.0574	27.2536	65.3718
ENSG00000153130	SCOC	short coiled-coil protein [Source:HGNC Symbol;Acc:HGNC:20335]	40.9585	40.2879	27.0113	26.5972
ENSG00000184007	PTP4A2	protein tyrosine phosphatase type IVA, member 2 [Source:HGNC Symbol;Acc:HGNC:9635]	40.8774	33.4891	65.3169	52.8879
ENSG00000179295	PTPN11	protein tyrosine phosphatase, non-receptor type 11 [Source:HGNC Symbol;Acc:HGNC:9644]	40.8677	22.7679	26.4958	27.0213
ENSG00000188042	ARL4C	ADP-ribosylation factor-like 4C [Source:HGNC Symbol;Acc:HGNC:698]	40.8492	40.2319	45.2861	31.0153
ENSG00000171552	BCL2L1	BCL2-like 1 [Source:HGNC Symbol;Acc:HGNC:992]	40.839	43.0024	34.3341	38.6639
ENSG00000188846	RPL14	ribosomal protein L14 [Source:HGNC Symbol;Acc:HGNC:10305]	40.8222	154.905	312.057	250.768
ENSG00000075413	MARK3	MAP/microtubule affinity-regulating kinase 3 [Source:HGNC Symbol;Acc:HGNC:6897]	40.7951	48.4897	62.3271	41.8242
ENSG00000149269	PAK1	p21 protein (Cdc42/Rac)-activated kinase 1 [Source:HGNC Symbol;Acc:HGNC:8590]	40.7861	54.9941	60.5943	53.8422
ENSG00000110881	ASIC1	acid sensing (proton gated) ion channel 1 [Source:HGNC Symbol;Acc:HGNC:100]	40.775	31.8017	22.7797	35.538
ENSG00000153904	DDAH1	dimethylarginine dimethylaminohydrolase 1 [Source:HGNC Symbol;Acc:HGNC:2715]	40.7432	77.3279	62.5945	45.9638
ENSG00000112531	QKI	QKI, KH domain containing, RNA binding [Source:HGNC Symbol;Acc:HGNC:21100]	40.7077	24.24	69.9966	45.556
ENSG00000008294	SPAG9	sperm associated antigen 9 [Source:HGNC Symbol;Acc:HGNC:14524]	40.631	42.9927	70.3785	62.8153
ENSG00000146066	HIGD2A	HIG1 hypoxia inducible domain family, member 2A [Source:HGNC Symbol;Acc:HGNC:28311]	40.6191	86.2263	70.1127	62.3452
ENSG00000166734	CASC4	cancer susceptibility candidate 4 [Source:HGNC Symbol;Acc:HGNC:24892]	40.6064	50.1365	43.6362	46.4425
ENSG00000168288	MMADHC	methylmalonic aciduria (cobalamin deficiency) cblD type, with homocystinuria [Source:HGNC Symbol;Acc:HGNC:25221]	40.5918	29.9891	33.9951	41.473
ENSG00000134291	TMEM106C	transmembrane protein 106C [Source:HGNC Symbol;Acc:HGNC:28775]	40.5646	7.39108	11.0176	12.1558
ENSG00000100403	ZC3H7B	zinc finger CCCH-type containing 7B [Source:HGNC Symbol;Acc:HGNC:30869]	40.5309	52.1864	46.8441	47.7012
ENSG00000104805	NUCB1	nucleobindin 1 [Source:HGNC Symbol;Acc:HGNC:8043]	40.5156	27.1857	25.9694	67.4255
ENSG00000084070	SMAP2	small ArfGAP2 [Source:HGNC Symbol;Acc:HGNC:25082]	40.514	55.7355	17.3662	36.4589
ENSG00000198171	DDRGK1	DDRGK domain containing 1 [Source:HGNC Symbol;Acc:HGNC:16110]	40.4729	22.4492	26.9293	31.8426
ENSG00000116688	MFN2	mitofusin 2 [Source:HGNC Symbol;Acc:HGNC:16877]	40.4695	44.1403	27.1829	43.8365
ENSG00000197226	TBC1D9B	TBC1 domain family, member 9B (with GRAM domain) [Source:HGNC Symbol;Acc:HGNC:29097]	40.4632	16.5845	14.5597	18.951
ENSG00000078053	AMPH	amphiphysin [Source:HGNC Symbol;Acc:HGNC:471]	40.4599	86.4615	42.2998	50.5773
ENSG00000174243	DDX23	DEAD (Asp-Glu-Ala-Asp) box polypeptide 23 [Source:HGNC Symbol;Acc:HGNC:17347]	40.4592	19.839	30.4523	24.3157
ENSG00000136807	CDK9	cyclin-dependent kinase 9 [Source:HGNC Symbol;Acc:HGNC:1780]	40.3782	22.4739	15.612	18.304
ENSG00000128872	TMOD2	tropomodulin 2 (neuronal) [Source:HGNC Symbol;Acc:HGNC:11872]	40.3489	75.4658	83.2333	45.2427
ENSG00000105443	CYTH2	cytohesin 2 [Source:HGNC Symbol;Acc:HGNC:9502]	40.3255	50.4682	55.8592	33.5873
ENSG00000173114	LRRN3	leucine rich repeat neuronal 3 [Source:HGNC Symbol;Acc:HGNC:17200]	40.3236	56.1916	72.3323	41.3271
ENSG00000099365	STX1B	syntaxin 1B [Source:HGNC Symbol;Acc:HGNC:18539]	40.302	111.452	20.4812	80.0213
ENSG00000132780	NASP	nuclear autoantigenic sperm protein (histone-binding) [Source:HGNC Symbol;Acc:HGNC:7644]	40.2981	24.5307	49.6512	34.1944
ENSG00000182979	MTA1	metastasis associated 1 [Source:HGNC Symbol;Acc:HGNC:7410]	40.2851	36.6945	42.9135	34.6888
ENSG00000107404	DVL1	dishevelled segment polarity protein 1 [Source:HGNC Symbol;Acc:HGNC:3084]	40.2729	30.5172	29.4054	20.3364
ENSG00000116983	HPCAL4	hippocalcin like 4 [Source:HGNC Symbol;Acc:HGNC:18212]	40.2659	37.9001	9.96392	9.66864
ENSG00000110880	CORO1C	coronin, actin binding protein, 1C [Source:HGNC Symbol;Acc:HGNC:2254]	40.2141	30.5449	40.1621	32.9226
ENSG00000087191	PSMC5	proteasome (prosome, macropain) 26S subunit, ATPase, 5 [Source:HGNC Symbol;Acc:HGNC:9552]	40.1017	77.3436	59.6335	85.0136
ENSG00000119865	CNRIP1	cannabinoid receptor interacting protein 1 [Source:HGNC Symbol;Acc:HGNC:24546]	40.0937	93.7509	33.8123	22.3218
ENSG00000185189	NRBP2	nuclear receptor binding protein 2 [Source:HGNC Symbol;Acc:HGNC:19339]	40.0935	84.6521	36.0325	67.7042
ENSG00000179632	MAF1	MAF1 homolog, negative regulator of RNA polymerase III [Source:HGNC Symbol;Acc:HGNC:24966]	40.0546	38.0782	52.6857	32.6685
ENSG00000141258	SGSM2	small G protein signaling modulator 2 [Source:HGNC Symbol;Acc:HGNC:29026]	40.0401	24.4139	16.6884	21.3062
ENSG00000180964	TCEAL8	transcription elongation factor A (SII)-like 8 [Source:HGNC Symbol;Acc:HGNC:28683]	39.9876	17.2091	21.1958	28.9938
ENSG00000196704	AMZ2	archaelysin family metallopeptidase 2 [Source:HGNC Symbol;Acc:HGNC:28041]	39.9764	51.7226	61.4326	50.5962
ENSG00000075043	KCNQ2	potassium channel, voltage gated KQT-like subfamily Q, member 2 [Source:HGNC Symbol;Acc:HGNC:6296]	39.9656	50.5044	32.5397	25.4905
ENSG00000210184	MT-TS2	mitochondrially encoded tRNA serine 2 (AGU/C) [Source:HGNC Symbol;Acc:HGNC:7498]	39.9561	14.0161	4.9829	8.36289
ENSG00000134108	ARL8B	ADP-ribosylation factor-like 8B [Source:HGNC Symbol;Acc:HGNC:25564]	39.9236	41.7889	35.9272	38.3714
ENSG00000112640	PPP2R5D	protein phosphatase 2, regulatory subunit B', delta [Source:HGNC Symbol;Acc:HGNC:9312]	39.8875	49.1684	44.2408	47.0231
ENSG00000106615	RHEB	Ras homolog enriched in brain [Source:HGNC Symbol;Acc:HGNC:10011]	39.8261	34.7684	21.5958	21.9224
ENSG00000196368	NUDT11	nudix (nucleoside diphosphate linked moiety X)-type motif 11 [Source:HGNC Symbol;Acc:HGNC:18011]	39.7902	15.4715	16.8823	13.8824
ENSG00000134644	PUM1	pumilio RNA-binding family member 1 [Source:HGNC Symbol;Acc:HGNC:14957]	39.7776	28.8997	41.7086	26.4659
ENSG00000111540	RAB5B	RAB5B, member RAS oncogene family [Source:HGNC Symbol;Acc:HGNC:9784]	39.7621	36.8426	34.7107	43.8779
ENSG00000198720	ANKRD13B	ankyrin repeat domain 13B [Source:HGNC Symbol;Acc:HGNC:26363]	39.7176	82.9597	39.058	27.9682
ENSG00000135439	AGAP2	ArfGAP with GTPase domain, ankyrin repeat and PH domain 2 [Source:HGNC Symbol;Acc:HGNC:16921]	39.7114	144.888	47.107	41.715
ENSG00000126461	SCAF1	SR-related CTD-associated factor 1 [Source:HGNC Symbol;Acc:HGNC:30403]	39.7033	31.7837	16.3886	23.9207
ENSG00000104979	C19orf53	chromosome 19 open reading frame 53 [Source:HGNC Symbol;Acc:HGNC:24991]	39.6996	57.5175	53.1203	62.9487
ENSG00000175928	LRRN1	leucine rich repeat neuronal 1 [Source:HGNC Symbol;Acc:HGNC:20980]	39.6821	16.515	21.9864	35.1152
ENSG00000143155	TIPRL	TOR signaling pathway regulator [Source:HGNC Symbol;Acc:HGNC:30231]	39.6703	17.4584	14.4453	14.099
ENSG00000151465	CDC123	cell division cycle 123 [Source:HGNC Symbol;Acc:HGNC:16827]	39.6364	28.8657	39.5109	37.0545
ENSG00000230989	HSBP1	heat shock factor binding protein 1 [Source:HGNC Symbol;Acc:HGNC:5203]	39.6345	356.301	167.799	194.434
ENSG00000171703	TCEA2	transcription elongation factor A (SII), 2 [Source:HGNC Symbol;Acc:HGNC:11614]	39.6084	12.6341	13.9635	6.37492
ENSG00000183207	RUVBL2	RuvB-like AAA ATPase 2 [Source:HGNC Symbol;Acc:HGNC:10475]	39.5984	20.6305	28.5877	20.987
ENSG00000107140	TESK1	testis-specific kinase 1 [Source:HGNC Symbol;Acc:HGNC:11731]	39.59	16.0917	11.9446	12.9765
ENSG00000108309	RUNDC3A	RUN domain containing 3A [Source:HGNC Symbol;Acc:HGNC:16984]	39.5715	119.243	92.3676	53.6026
ENSG00000170873	MTSS1	metastasis suppressor 1 [Source:HGNC Symbol;Acc:HGNC:20443]	39.5683	48.5636	54.7817	32.578
ENSG00000143702	CEP170	centrosomal protein 170kDa [Source:HGNC Symbol;Acc:HGNC:28920]	39.5612	41.7033	79.8637	36.6977
ENSG00000163344	PMVK	phosphomevalonate kinase [Source:HGNC Symbol;Acc:HGNC:9141]	39.5594	55.5616	42.4543	53.0326
ENSG00000145912	NHP2	NHP2 ribonucleoprotein [Source:HGNC Symbol;Acc:HGNC:14377]	39.5345	27.6649	26.5998	21.6048
ENSG00000171530	TBCA	tubulin folding cofactor A [Source:HGNC Symbol;Acc:HGNC:11579]	39.4601	134.682	170.733	112.609
ENSG00000130748	TMEM160	transmembrane protein 160 [Source:HGNC Symbol;Acc:HGNC:26042]	39.4416	45.8451	16.3739	17.2322
ENSG00000074319	TSG101	tumor susceptibility 101 [Source:HGNC Symbol;Acc:HGNC:15971]	39.398	45.3401	64.7661	46.9468
ENSG00000213676	ATF6B	activating transcription factor 6 beta [Source:HGNC Symbol;Acc:HGNC:2349]	39.3373	42.9999	19.0312	28.8244
ENSG00000119669	IRF2BPL	interferon regulatory factor 2 binding protein-like [Source:HGNC Symbol;Acc:HGNC:14282]	39.2964	42.7407	26.9767	17.5123
ENSG00000101294	HM13	histocompatibility (minor) 13 [Source:HGNC Symbol;Acc:HGNC:16435]	39.2686	31.4535	25.7943	19.9752
ENSG00000253305	PCDHGB6	protocadherin gamma subfamily B, 6 [Source:HGNC Symbol;Acc:HGNC:8713]	39.2649	2.65045	3.5527	6.12727
ENSG00000197157	SND1	staphylococcal nuclease and tudor domain containing 1 [Source:HGNC Symbol;Acc:HGNC:30646]	39.2424	31.3038	42.1153	37.0418
ENSG00000177700	POLR2L	polymerase (RNA) II (DNA directed) polypeptide L, 7.6kDa [Source:HGNC Symbol;Acc:HGNC:9199]	39.2415	10.8828	9.32664	7.20433
ENSG00000078725	BRINP1	bone morphogenetic protein/retinoic acid inducible neural-specific 1 [Source:HGNC Symbol;Acc:HGNC:2687]	39.2315	44.2585	17.8883	30.0898
ENSG00000105379	ETFB	electron-transfer-flavoprotein, beta polypeptide [Source:HGNC Symbol;Acc:HGNC:3482]	39.2021	4.22144	5.69798	9.44502
ENSG00000105737	GRIK5	glutamate receptor, ionotropic, kainate 5 [Source:HGNC Symbol;Acc:HGNC:4583]	39.1953	70.9245	15.8497	38.3569
ENSG00000114503	NCBP2	nuclear cap binding protein subunit 2, 20kDa [Source:HGNC Symbol;Acc:HGNC:7659]	39.0223	31.1726	30.0593	37.4369
ENSG00000101266	CSNK2A1	casein kinase 2, alpha 1 polypeptide [Source:HGNC Symbol;Acc:HGNC:2457]	39.0133	29.4037	63.5301	34.3347
ENSG00000119013	NDUFB3	NADH dehydrogenase (ubiquinone) 1 beta subcomplex, 3, 12kDa [Source:HGNC Symbol;Acc:HGNC:7698]	38.9926	52.6464	41.4171	35.0364
ENSG00000166197	NOLC1	nucleolar and coiled-body phosphoprotein 1 [Source:HGNC Symbol;Acc:HGNC:15608]	38.9647	19.4346	25.4787	21.055
ENSG00000143575	HAX1	HCLS1 associated protein X-1 [Source:HGNC Symbol;Acc:HGNC:16915]	38.9334	13.7658	20.4186	23.0758
ENSG00000184867	ARMCX2	armadillo repeat containing, X-linked 2 [Source:HGNC Symbol;Acc:HGNC:16869]	38.9174	39.609	41.4138	59.3042
ENSG00000170759	KIF5B	kinesin family member 5B [Source:HGNC Symbol;Acc:HGNC:6324]	38.915	33.5323	53.0002	26.1824
ENSG00000071859	FAM50A	family with sequence similarity 50, member A [Source:HGNC Symbol;Acc:HGNC:18786]	38.8799	14.9414	13.3103	18.7808
ENSG00000102054	RBBP7	retinoblastoma binding protein 7 [Source:HGNC Symbol;Acc:HGNC:9890]	38.8512	80.0332	76.0133	102.381
ENSG00000219438	FAM19A5	family with sequence similarity 19 (chemokine (C-C motif)-like), member A5 [Source:HGNC Symbol;Acc:HGNC:21592]	38.8063	29.3992	23.1997	25.9555
ENSG00000213995	CARKD	carbohydrate kinase domain containing [Source:HGNC Symbol;Acc:HGNC:25576]	38.7996	15.6365	18.3484	13.7371
ENSG00000114554	PLXNA1	plexin A1 [Source:HGNC Symbol;Acc:HGNC:9099]	38.7688	46.3849	32.3001	32.1499
ENSG00000180901	KCTD2	potassium channel tetramerization domain containing 2 [Source:HGNC Symbol;Acc:HGNC:21294]	38.7477	14.4914	13.109	14.236
ENSG00000160007	ARHGAP35	Rho GTPase activating protein 35 [Source:HGNC Symbol;Acc:HGNC:4591]	38.7234	30.8819	46.8044	40.1469
ENSG00000100644	HIF1A	hypoxia inducible factor 1, alpha subunit (basic helix-loop-helix transcription factor) [Source:HGNC Symbol;Acc:HGNC:4910]	38.7204	26.1046	39.7741	30.8028
ENSG00000090060	PAPOLA	poly(A) polymerase alpha [Source:HGNC Symbol;Acc:HGNC:14981]	38.7122	30.4712	31.6486	39.4754
ENSG00000177732	SOX12	SRY (sex determining region Y)-box 12 [Source:HGNC Symbol;Acc:HGNC:11198]	38.6859	31.1799	17.5688	21.1153
ENSG00000099901	RANBP1	RAN binding protein 1 [Source:HGNC Symbol;Acc:HGNC:9847]	38.6191	61.9263	88.0583	66.8119
ENSG00000133226	SRRM1	serine/arginine repetitive matrix 1 [Source:HGNC Symbol;Acc:HGNC:16638]	38.6015	33.0705	18.1336	45.3663
ENSG00000135018	UBQLN1	ubiquilin 1 [Source:HGNC Symbol;Acc:HGNC:12508]	38.5995	64.2057	59.5556	54.8041
ENSG00000124207	CSE1L	CSE1 chromosome segregation 1-like (yeast) [Source:HGNC Symbol;Acc:HGNC:2431]	38.5789	30.9693	35.7339	36.073
ENSG00000150316	CWC15	CWC15 spliceosome-associated protein [Source:HGNC Symbol;Acc:HGNC:26939]	38.5566	41.9048	59.8194	55.309
ENSG00000101199	ARFGAP1	ADP-ribosylation factor GTPase activating protein 1 [Source:HGNC Symbol;Acc:HGNC:15852]	38.5168	22.2897	22.673	28.7362
ENSG00000126524	SBDS	Shwachman-Bodian-Diamond syndrome [Source:HGNC Symbol;Acc:HGNC:19440]	38.4822	20.8643	20.1226	25.4769
ENSG00000157837	SPPL3	signal peptide peptidase like 3 [Source:HGNC Symbol;Acc:HGNC:30424]	38.4745	37.668	35.1164	37.9979
ENSG00000165821	SALL2	spalt-like transcription factor 2 [Source:HGNC Symbol;Acc:HGNC:10526]	38.4645	13.9944	19.3745	23.1115
ENSG00000145860	RNF145	ring finger protein 145 [Source:HGNC Symbol;Acc:HGNC:20853]	38.451	25.2619	24.6175	31.3098
ENSG00000174780	SRP72	signal recognition particle 72kDa [Source:HGNC Symbol;Acc:HGNC:11303]	38.4397	32.9017	41.4791	48.2357
ENSG00000157064	NMNAT2	nicotinamide nucleotide adenylyltransferase 2 [Source:HGNC Symbol;Acc:HGNC:16789]	38.4353	41.026	62.7815	24.6275
ENSG00000225921	NOL7	nucleolar protein 7, 27kDa [Source:HGNC Symbol;Acc:HGNC:21040]	38.4225	21.3442	23.6528	22.5555
ENSG00000174851	YIF1A	Yip1 interacting factor homolog A (S. cerevisiae) [Source:HGNC Symbol;Acc:HGNC:16688]	38.4197	9.17492	15.7058	16.9249
ENSG00000154928	EPHB1	EPH receptor B1 [Source:HGNC Symbol;Acc:HGNC:3392]	38.4019	6.26137	9.58411	17.7436
ENSG00000159685	CHCHD6	coiled-coil-helix-coiled-coil-helix domain containing 6 [Source:HGNC Symbol;Acc:HGNC:28184]	38.3915	27.7668	15.623	16.7883
ENSG00000130821	SLC6A8	solute carrier family 6 (neurotransmitter transporter), member 8 [Source:HGNC Symbol;Acc:HGNC:11055]	38.3431	21.7232	15.0738	21.0258
ENSG00000116679	IVNS1ABP	influenza virus NS1A binding protein [Source:HGNC Symbol;Acc:HGNC:16951]	38.3363	68.4225	118.988	62.324
ENSG00000114383	TUSC2	tumor suppressor candidate 2 [Source:HGNC Symbol;Acc:HGNC:17034]	38.3231	33.9765	26.6338	32.314
ENSG00000091129	NRCAM	neuronal cell adhesion molecule [Source:HGNC Symbol;Acc:HGNC:7994]	38.3171	50.1823	40.7732	25.6591
ENSG00000167178	ISLR2	immunoglobulin superfamily containing leucine-rich repeat 2 [Source:HGNC Symbol;Acc:HGNC:29286]	38.2736	61.9066	76.2925	32.4204
ENSG00000103353	UBFD1	ubiquitin family domain containing 1 [Source:HGNC Symbol;Acc:HGNC:30565]	38.2646	22.2844	30.499	37.6662
ENSG00000141279	NPEPPS	aminopeptidase puromycin sensitive [Source:HGNC Symbol;Acc:HGNC:7900]	38.2546	68.635	37.2828	64.2486
ENSG00000167535	CACNB3	calcium channel, voltage-dependent, beta 3 subunit [Source:HGNC Symbol;Acc:HGNC:1403]	38.2347	76.8266	66.5599	45.2585
ENSG00000146083	RNF44	ring finger protein 44 [Source:HGNC Symbol;Acc:HGNC:19180]	38.212	33.0008	15.9837	26.7979
ENSG00000141985	SH3GL1	SH3-domain GRB2-like 1 [Source:HGNC Symbol;Acc:HGNC:10830]	38.2088	30.4283	28.0577	34.1066
ENSG00000079432	CIC	capicua transcriptional repressor [Source:HGNC Symbol;Acc:HGNC:14214]	38.2013	51.5467	24.6948	28.5323
ENSG00000143384	MCL1	myeloid cell leukemia 1 [Source:HGNC Symbol;Acc:HGNC:6943]	38.1966	30.5989	42.2617	47.2044
ENSG00000142173	COL6A2	collagen, type VI, alpha 2 [Source:HGNC Symbol;Acc:HGNC:2212]	38.1851	0.801928	2.5696	121.236
ENSG00000139116	KIF21A	kinesin family member 21A [Source:HGNC Symbol;Acc:HGNC:19349]	38.1826	25.376	43.5494	23.3067
ENSG00000118432	CNR1	cannabinoid receptor 1 (brain) [Source:HGNC Symbol;Acc:HGNC:2159]	38.1543	42.2712	71.9246	11.5976
ENSG00000180228	PRKRA	protein kinase, interferon-inducible double stranded RNA dependent activator [Source:HGNC Symbol;Acc:HGNC:9438]	38.1493	19.3786	26.5917	32.2007
ENSG00000143549	TPM3	tropomyosin 3 [Source:HGNC Symbol;Acc:HGNC:12012]	38.0825	88.0311	82.1718	61.2435
ENSG00000176490	DIRAS1	DIRAS family, GTP-binding RAS-like 1 [Source:HGNC Symbol;Acc:HGNC:19127]	38.0219	39.4547	14.9018	22.862
ENSG00000182628	SKA2	spindle and kinetochore associated complex subunit 2 [Source:HGNC Symbol;Acc:HGNC:28006]	38.0215	6.66487	13.2244	10.3458
ENSG00000185222	WBP5	WW domain binding protein 5 [Source:HGNC Symbol;Acc:HGNC:30084]	37.9873	71.1594	85.2566	109.21
ENSG00000092201	SUPT16H	suppressor of Ty 16 homolog (S. cerevisiae) [Source:HGNC Symbol;Acc:HGNC:11465]	37.968	15.143	34.4551	23.8919
ENSG00000184432	COPB2	coatomer protein complex, subunit beta 2 (beta prime) [Source:HGNC Symbol;Acc:HGNC:2232]	37.9568	43.5031	69.5502	76.1116
ENSG00000022277	RTFDC1	replication termination factor 2 domain containing 1 [Source:HGNC Symbol;Acc:HGNC:15890]	37.9325	37.0494	37.3846	35.1506
ENSG00000171004	HS6ST2	heparan sulfate 6-O-sulfotransferase 2 [Source:HGNC Symbol;Acc:HGNC:19133]	37.8954	23.2322	21.0321	32.8468
ENSG00000158710	TAGLN2	transgelin 2 [Source:HGNC Symbol;Acc:HGNC:11554]	37.8685	9.17213	8.24623	34.9666
ENSG00000130177	CDC16	cell division cycle 16 [Source:HGNC Symbol;Acc:HGNC:1720]	37.8604	35.6397	53.0387	53.6134
ENSG00000088448	ANKRD10	ankyrin repeat domain 10 [Source:HGNC Symbol;Acc:HGNC:20265]	37.8532	26.0561	36.303	22.8662
ENSG00000173621	LRFN4	leucine rich repeat and fibronectin type III domain containing 4 [Source:HGNC Symbol;Acc:HGNC:28456]	37.8433	40.9292	26.1588	23.2535
ENSG00000115234	SNX17	sorting nexin 17 [Source:HGNC Symbol;Acc:HGNC:14979]	37.8404	33.0467	31.862	42.5927
ENSG00000140474	ULK3	unc-51 like kinase 3 [Source:HGNC Symbol;Acc:HGNC:19703]	37.8242	8.21827	2.67606	7.7549
ENSG00000196924	FLNA	filamin A, alpha [Source:HGNC Symbol;Acc:HGNC:3754]	37.7854	59.539	98.3872	69.7721
ENSG00000188070	C11orf95	chromosome 11 open reading frame 95 [Source:HGNC Symbol;Acc:HGNC:28449]	37.7255	49.5094	63.368	22.1926
ENSG00000131067	GGT7	gamma-glutamyltransferase 7 [Source:HGNC Symbol;Acc:HGNC:4259]	37.7236	37.7048	23.8402	20.0212
ENSG00000153956	CACNA2D1	calcium channel, voltage-dependent, alpha 2/delta subunit 1 [Source:HGNC Symbol;Acc:HGNC:1399]	37.72	37.3307	33.2852	19.4349
ENSG00000172053	QARS	glutaminyl-tRNA synthetase [Source:HGNC Symbol;Acc:HGNC:9751]	37.7076	20.652	22.8524	32.2018
ENSG00000198612	COPS8	COP9 signalosome subunit 8 [Source:HGNC Symbol;Acc:HGNC:24335]	37.6377	34.6777	30.8555	31.3106
ENSG00000103197	TSC2	tuberous sclerosis 2 [Source:HGNC Symbol;Acc:HGNC:12363]	37.6204	18.2746	18.2138	20.1199
ENSG00000198816	ZNF358	zinc finger protein 358 [Source:HGNC Symbol;Acc:HGNC:16838]	37.6043	16.3079	18.9948	21.6587
ENSG00000154174	TOMM70A	translocase of outer mitochondrial membrane 70 homolog A (S. cerevisiae) [Source:HGNC Symbol;Acc:HGNC:11985]	37.586	85.1058	84.7177	70.6638
ENSG00000067606	PRKCZ	protein kinase C, zeta [Source:HGNC Symbol;Acc:HGNC:9412]	37.5855	50.091	38.2773	20.6826
ENSG00000068796	KIF2A	kinesin heavy chain member 2A [Source:HGNC Symbol;Acc:HGNC:6318]	37.5318	42.523	26.494	32.1577
ENSG00000072506	HSD17B10	hydroxysteroid (17-beta) dehydrogenase 10 [Source:HGNC Symbol;Acc:HGNC:4800]	37.496	21.9914	34.2243	38.0366
ENSG00000184640	2009-09-01	septin 9 [Source:HGNC Symbol;Acc:HGNC:7323]	37.477	20.1813	27.4905	38.5093
ENSG00000180354	MTURN	maturin, neural progenitor differentiation regulator homolog (Xenopus) [Source:HGNC Symbol;Acc:HGNC:25457]	37.473	76.3143	81.2312	45.6508
ENSG00000136527	TRA2B	transformer 2 beta homolog (Drosophila) [Source:HGNC Symbol;Acc:HGNC:10781]	37.4713	24.1851	39.6659	31.7606
ENSG00000176884	GRIN1	glutamate receptor, ionotropic, N-methyl D-aspartate 1 [Source:HGNC Symbol;Acc:HGNC:4584]	37.4582	57.4168	10.4046	19.6753
ENSG00000100095	SEZ6L	seizure related 6 homolog (mouse)-like [Source:HGNC Symbol;Acc:HGNC:10763]	37.4296	41.7738	17.1708	27.9952
ENSG00000168894	RNF181	ring finger protein 181 [Source:HGNC Symbol;Acc:HGNC:28037]	37.384	38.772	28.3279	46.4196
ENSG00000078618	NRD1	nardilysin (N-arginine dibasic convertase) [Source:HGNC Symbol;Acc:HGNC:7995]	37.3435	36.8152	32.297	38.7785
ENSG00000130203	APOE	apolipoprotein E [Source:HGNC Symbol;Acc:HGNC:613]	37.3195	561.989	280.399	473.704
ENSG00000168243	GNG4	guanine nucleotide binding protein (G protein), gamma 4 [Source:HGNC Symbol;Acc:HGNC:4407]	37.31	46.333	11.0797	44.0288
ENSG00000135144	DTX1	deltex 1, E3 ubiquitin ligase [Source:HGNC Symbol;Acc:HGNC:3060]	37.3036	38.8854	30.0991	22.2294
ENSG00000154639	CXADR	coxsackie virus and adenovirus receptor [Source:HGNC Symbol;Acc:HGNC:2559]	37.2978	95.7621	127.311	88.7478
ENSG00000156052	GNAQ	guanine nucleotide binding protein (G protein), q polypeptide [Source:HGNC Symbol;Acc:HGNC:4390]	37.2924	68.0645	54.8614	48.1641
ENSG00000103723	AP3B2	adaptor-related protein complex 3, beta 2 subunit [Source:HGNC Symbol;Acc:HGNC:567]	37.285	65.3814	55.9343	40.7697
ENSG00000075142	SRI	sorcin [Source:HGNC Symbol;Acc:HGNC:11292]	37.2694	21.5426	17.1786	24.4193
ENSG00000132485	ZRANB2	zinc finger, RAN-binding domain containing 2 [Source:HGNC Symbol;Acc:HGNC:13058]	37.2649	65.4482	57.7015	49.5741
ENSG00000163320	CGGBP1	CGG triplet repeat binding protein 1 [Source:HGNC Symbol;Acc:HGNC:1888]	37.2366	21.1597	37.6522	30.5295
ENSG00000108960	MMD	monocyte to macrophage differentiation-associated [Source:HGNC Symbol;Acc:HGNC:7153]	37.2096	72.9388	37.9878	52.7802
ENSG00000150787	PTS	6-pyruvoyltetrahydropterin synthase [Source:HGNC Symbol;Acc:HGNC:9689]	37.1995	16.566	17.3762	12.0413
ENSG00000160917	CPSF4	cleavage and polyadenylation specific factor 4, 30kDa [Source:HGNC Symbol;Acc:HGNC:2327]	37.1916	11.0512	13.914	12.0486
ENSG00000153395	LPCAT1	lysophosphatidylcholine acyltransferase 1 [Source:HGNC Symbol;Acc:HGNC:25718]	37.1667	26.4535	35.9687	23.1497
ENSG00000210191	MT-TL2	mitochondrially encoded tRNA leucine 2 (CUN) [Source:HGNC Symbol;Acc:HGNC:7491]	37.1571	11.1565	11.486	7.60979
ENSG00000179915	NRXN1	neurexin 1 [Source:HGNC Symbol;Acc:HGNC:8008]	37.1543	57.9573	54.3925	27.1215
ENSG00000185896	LAMP1	lysosomal-associated membrane protein 1 [Source:HGNC Symbol;Acc:HGNC:6499]	37.1538	149.67	145.904	231.287
ENSG00000115875	SRSF7	serine/arginine-rich splicing factor 7 [Source:HGNC Symbol;Acc:HGNC:10789]	37.1463	47.7332	79.7188	46.6731
ENSG00000127585	FBXL16	F-box and leucine-rich repeat protein 16 [Source:HGNC Symbol;Acc:HGNC:14150]	37.1354	106.758	30.8672	32.636
ENSG00000156973	PDE6D	phosphodiesterase 6D, cGMP-specific, rod, delta [Source:HGNC Symbol;Acc:HGNC:8788]	37.1321	39.7806	21.2112	32.9154
ENSG00000164687	FABP5	fatty acid binding protein 5 (psoriasis-associated) [Source:HGNC Symbol;Acc:HGNC:3560]	37.1212	52.3849	85.3567	42.2024
ENSG00000139636	LMBR1L	limb development membrane protein 1-like [Source:HGNC Symbol;Acc:HGNC:18268]	37.0982	8.68377	14.0056	9.06686
ENSG00000185883	ATP6V0C	ATPase, H+ transporting, lysosomal 16kDa, V0 subunit c [Source:HGNC Symbol;Acc:HGNC:855]	37.0965	14.9524	3.55761	7.11242
ENSG00000213619	NDUFS3	NADH dehydrogenase (ubiquinone) Fe-S protein 3, 30kDa (NADH-coenzyme Q reductase) [Source:HGNC Symbol;Acc:HGNC:7710]	37.0468	61.5618	50.4473	57.8394
ENSG00000108424	KPNB1	karyopherin (importin) beta 1 [Source:HGNC Symbol;Acc:HGNC:6400]	37.0317	42.7364	59.2627	61.834
ENSG00000178233	TMEM151B	transmembrane protein 151B [Source:HGNC Symbol;Acc:HGNC:21315]	37.0313	25.3224	14.6589	7.8144
ENSG00000130559	CAMSAP1	calmodulin regulated spectrin-associated protein 1 [Source:HGNC Symbol;Acc:HGNC:19946]	36.9938	24.0341	39.7252	19.9739
ENSG00000115866	DARS	aspartyl-tRNA synthetase [Source:HGNC Symbol;Acc:HGNC:2678]	36.9758	25.8705	42.9928	46.6783
ENSG00000198563	DDX39B	DEAD (Asp-Glu-Ala-Asp) box polypeptide 39B [Source:HGNC Symbol;Acc:HGNC:13917]	36.9708	79.0323	96.5584	77.4471
ENSG00000106153	CHCHD2	coiled-coil-helix-coiled-coil-helix domain containing 2 [Source:HGNC Symbol;Acc:HGNC:21645]	36.9446	86.8779	66.0579	44.6916
ENSG00000122584	NXPH1	neurexophilin 1 [Source:HGNC Symbol;Acc:HGNC:20693]	36.8891	34.0227	26.0675	9.11077
ENSG00000108107	RPL28	ribosomal protein L28 [Source:HGNC Symbol;Acc:HGNC:10330]	36.8545	123.406	175.523	189.895
ENSG00000122034	GTF3A	general transcription factor IIIA [Source:HGNC Symbol;Acc:HGNC:4662]	36.846	6.98529	4.66	4.75592
ENSG00000149428	HYOU1	hypoxia up-regulated 1 [Source:HGNC Symbol;Acc:HGNC:16931]	36.7708	20.1824	21.8899	29.3894
ENSG00000196655	TRAPPC4	trafficking protein particle complex 4 [Source:HGNC Symbol;Acc:HGNC:19943]	36.7246	59.7737	52.4111	46.9205
ENSG00000102103	PQBP1	polyglutamine binding protein 1 [Source:HGNC Symbol;Acc:HGNC:9330]	36.707	38.688	46.2115	45.9625
ENSG00000144224	UBXN4	UBX domain protein 4 [Source:HGNC Symbol;Acc:HGNC:14860]	36.6932	22.1443	28.6849	31.0462
ENSG00000077147	TM9SF3	transmembrane 9 superfamily member 3 [Source:HGNC Symbol;Acc:HGNC:21529]	36.6852	39.1862	48.2454	50.8437
ENSG00000147180	ZNF711	zinc finger protein 711 [Source:HGNC Symbol;Acc:HGNC:13128]	36.6816	8.32414	15.0693	9.75927
ENSG00000108679	LGALS3BP	lectin, galactoside-binding, soluble, 3 binding protein [Source:HGNC Symbol;Acc:HGNC:6564]	36.6776	2.65719	1.57198	24.3741
ENSG00000091483	FH	fumarate hydratase [Source:HGNC Symbol;Acc:HGNC:3700]	36.6774	33.3124	24.4499	31.8605
ENSG00000074842	MYDGF	myeloid-derived growth factor [Source:HGNC Symbol;Acc:HGNC:16948]	36.6725	26.7744	19.8085	31.0023
ENSG00000105968	H2AFV	H2A histone family, member V [Source:HGNC Symbol;Acc:HGNC:20664]	36.6681	11.1103	30.0913	20.3269
ENSG00000156639	ZFAND3	zinc finger, AN1-type domain 3 [Source:HGNC Symbol;Acc:HGNC:18019]	36.6556	32.1536	32.4791	38.3651
ENSG00000110696	C11orf58	chromosome 11 open reading frame 58 [Source:HGNC Symbol;Acc:HGNC:16990]	36.6501	89.7761	86.9827	66.041
ENSG00000211460	TSN	translin [Source:HGNC Symbol;Acc:HGNC:12379]	36.6451	16.5958	26.0445	25.9552
ENSG00000166206	GABRB3	gamma-aminobutyric acid (GABA) A receptor, beta 3 [Source:HGNC Symbol;Acc:HGNC:4083]	36.6128	77.9221	55.6034	36.3919
ENSG00000121766	ZCCHC17	zinc finger, CCHC domain containing 17 [Source:HGNC Symbol;Acc:HGNC:30246]	36.6004	24.5256	22.1592	19.5467
ENSG00000189339	SLC35E2B	solute carrier family 35, member E2B [Source:HGNC Symbol;Acc:HGNC:33941]	36.5758	6.7694	10.5265	8.45173
ENSG00000095139	ARCN1	archain 1 [Source:HGNC Symbol;Acc:HGNC:649]	36.5554	41.3341	44.3195	61.1794
ENSG00000188021	UBQLN2	ubiquilin 2 [Source:HGNC Symbol;Acc:HGNC:12509]	36.4804	108.925	29.5322	70.8104
ENSG00000089063	TMEM230	transmembrane protein 230 [Source:HGNC Symbol;Acc:HGNC:15876]	36.4622	4.59066	5.13064	8.77146
ENSG00000184831	APOO	apolipoprotein O [Source:HGNC Symbol;Acc:HGNC:28727]	36.4487	14.2869	16.9872	13.4107
ENSG00000123560	PLP1	proteolipid protein 1 [Source:HGNC Symbol;Acc:HGNC:9086]	36.432	4.59809	13.5362	1.7849
ENSG00000101040	ZMYND8	zinc finger, MYND-type containing 8 [Source:HGNC Symbol;Acc:HGNC:9397]	36.4227	15.5084	16.7369	20.2802
ENSG00000166924	NYAP1	neuronal tyrosine-phosphorylated phosphoinositide-3-kinase adaptor 1 [Source:HGNC Symbol;Acc:HGNC:22009]	36.3877	51.5049	41.1726	26.9517
ENSG00000146005	PSD2	pleckstrin and Sec7 domain containing 2 [Source:HGNC Symbol;Acc:HGNC:19092]	36.3784	23.2988	28.349	21.8815
ENSG00000135002	RFK	riboflavin kinase [Source:HGNC Symbol;Acc:HGNC:30324]	36.3687	26.4563	21.7815	27.4442
ENSG00000132002	DNAJB1	DnaJ (Hsp40) homolog, subfamily B, member 1 [Source:HGNC Symbol;Acc:HGNC:5270]	36.3611	26.1974	21.8133	28.2363
ENSG00000116857	TMEM9	transmembrane protein 9 [Source:HGNC Symbol;Acc:HGNC:18823]	36.315	37.2129	26.5257	47.5087
ENSG00000102181	CD99L2	CD99 molecule-like 2 [Source:HGNC Symbol;Acc:HGNC:18237]	36.2974	52.1756	37.1791	53.7027
ENSG00000066117	SMARCD1	SWI/SNF related, matrix associated, actin dependent regulator of chromatin, subfamily d, member 1 [Source:HGNC Symbol;Acc:HGNC:11106]	36.2931	41.4775	32.2312	41.5875
ENSG00000147642	SYBU	syntabulin (syntaxin-interacting) [Source:HGNC Symbol;Acc:HGNC:26011]	36.2728	73.1937	62.3793	25.4929
ENSG00000171450	CDK5R2	cyclin-dependent kinase 5, regulatory subunit 2 (p39) [Source:HGNC Symbol;Acc:HGNC:1776]	36.2506	160.246	7.18073	39.9725
ENSG00000184545	DUSP8	dual specificity phosphatase 8 [Source:HGNC Symbol;Acc:HGNC:3074]	36.2415	43.8618	28.6651	36.9374
ENSG00000198561	CTNND1	catenin (cadherin-associated protein), delta 1 [Source:HGNC Symbol;Acc:HGNC:2515]	36.2395	2.60974	2.90028	3.27588
ENSG00000168002	POLR2G	polymerase (RNA) II (DNA directed) polypeptide G [Source:HGNC Symbol;Acc:HGNC:9194]	36.2383	47.9667	44.9507	50.2368
ENSG00000196220	SRGAP3	SLIT-ROBO Rho GTPase activating protein 3 [Source:HGNC Symbol;Acc:HGNC:19744]	36.2347	59.3673	24.3973	39.0751
ENSG00000103495	MAZ	MYC-associated zinc finger protein (purine-binding transcription factor) [Source:HGNC Symbol;Acc:HGNC:6914]	36.1993	122.383	65.1527	90.8711
ENSG00000099624	ATP5D	ATP synthase, H+ transporting, mitochondrial F1 complex, delta subunit [Source:HGNC Symbol;Acc:HGNC:837]	36.1491	140.64	63.0536	85.5189
ENSG00000171604	CXXC5	CXXC finger protein 5 [Source:HGNC Symbol;Acc:HGNC:26943]	36.1379	11.0421	9.6735	38.1861
ENSG00000100401	RANGAP1	Ran GTPase activating protein 1 [Source:HGNC Symbol;Acc:HGNC:9854]	36.126	104.283	79.5717	63.2347
ENSG00000100263	RHBDD3	rhomboid domain containing 3 [Source:HGNC Symbol;Acc:HGNC:1308]	36.1236	9.56885	8.44803	9.30262
ENSG00000165434	PGM2L1	phosphoglucomutase 2-like 1 [Source:HGNC Symbol;Acc:HGNC:20898]	36.1125	91.0747	51.9486	52.5479
ENSG00000131467	PSME3	proteasome (prosome, macropain) activator subunit 3 (PA28 gamma; Ki) [Source:HGNC Symbol;Acc:HGNC:9570]	36.1009	39.5097	25.3602	43.6296
ENSG00000067141	NEO1	neogenin 1 [Source:HGNC Symbol;Acc:HGNC:7754]	36.0989	61.7002	63.3846	51.817
ENSG00000054118	THRAP3	thyroid hormone receptor associated protein 3 [Source:HGNC Symbol;Acc:HGNC:22964]	36.0822	22.5043	40.7695	30.9829
ENSG00000237441	RGL2	ral guanine nucleotide dissociation stimulator-like 2 [Source:HGNC Symbol;Acc:HGNC:9769]	36.075	16.7152	15.4563	19.0506
ENSG00000265354	TIMM23	translocase of inner mitochondrial membrane 23 homolog (yeast) [Source:HGNC Symbol;Acc:HGNC:17312]	36.0694	27.8426	34.17	29.8141
ENSG00000181222	POLR2A	polymerase (RNA) II (DNA directed) polypeptide A, 220kDa [Source:HGNC Symbol;Acc:HGNC:9187]	36.0594	19.5104	4.37687	38.7426
ENSG00000128266	GNAZ	guanine nucleotide binding protein (G protein), alpha z polypeptide [Source:HGNC Symbol;Acc:HGNC:4395]	36.0447	43.1442	33.3946	23.7766
ENSG00000141562	NARF	nuclear prelamin A recognition factor [Source:HGNC Symbol;Acc:HGNC:29916]	36.0165	36.2142	23.3541	19.5318
ENSG00000003756	RBM5	RNA binding motif protein 5 [Source:HGNC Symbol;Acc:HGNC:9902]	35.9849	25.5888	42.6877	33.9184
ENSG00000100220	RTCB	RNA 2',3'-cyclic phosphate and 5'-OH ligase [Source:HGNC Symbol;Acc:HGNC:26935]	35.9771	54.982	77.6431	77.1156
ENSG00000064726	BTBD1	BTB (POZ) domain containing 1 [Source:HGNC Symbol;Acc:HGNC:1120]	35.9754	57.1872	55.2166	25.6376
ENSG00000100997	ABHD12	abhydrolase domain containing 12 [Source:HGNC Symbol;Acc:HGNC:15868]	35.9662	57.0661	41.1087	40.2205
ENSG00000169727	GPS1	G protein pathway suppressor 1 [Source:HGNC Symbol;Acc:HGNC:4549]	35.9559	54.7716	57.8301	48.8637
ENSG00000145730	PAM	peptidylglycine alpha-amidating monooxygenase [Source:HGNC Symbol;Acc:HGNC:8596]	35.9452	46.2368	39.4687	25.8728
ENSG00000186111	PIP5K1C	phosphatidylinositol-4-phosphate 5-kinase, type I, gamma [Source:HGNC Symbol;Acc:HGNC:8996]	35.9316	109.667	60.513	52.7042
ENSG00000075151	EIF4G3	eukaryotic translation initiation factor 4 gamma, 3 [Source:HGNC Symbol;Acc:HGNC:3298]	35.8951	37.4866	23.8665	31.3579
ENSG00000118518	RNF146	ring finger protein 146 [Source:HGNC Symbol;Acc:HGNC:21336]	35.8785	12.1663	16.5396	12.1674
ENSG00000171160	MORN4	MORN repeat containing 4 [Source:HGNC Symbol;Acc:HGNC:24001]	35.8776	58.195	31.8193	28.8473
ENSG00000110697	PITPNM1	phosphatidylinositol transfer protein, membrane-associated 1 [Source:HGNC Symbol;Acc:HGNC:9003]	35.8611	36.4324	18.9551	18.7169
ENSG00000130758	MAP3K10	mitogen-activated protein kinase kinase kinase 10 [Source:HGNC Symbol;Acc:HGNC:6849]	35.8262	83.9578	29.8643	30.9721
ENSG00000167863	ATP5H	ATP synthase, H+ transporting, mitochondrial Fo complex, subunit d [Source:HGNC Symbol;Acc:HGNC:845]	35.8219	96.4963	138.364	136.694
ENSG00000091527	CDV3	CDV3 homolog (mouse) [Source:HGNC Symbol;Acc:HGNC:26928]	35.7955	26.7959	46.3897	38.2356
ENSG00000060762	MPC1	mitochondrial pyruvate carrier 1 [Source:HGNC Symbol;Acc:HGNC:21606]	35.7934	38.1476	25.2088	24.4485
ENSG00000169855	ROBO1	roundabout guidance receptor 1 [Source:HGNC Symbol;Acc:HGNC:10249]	35.7044	13.5463	45.3175	21.8177
ENSG00000139726	DENR	density-regulated protein [Source:HGNC Symbol;Acc:HGNC:2769]	35.6919	16.3772	14.3517	16.4597
ENSG00000141551	CSNK1D	casein kinase 1, delta [Source:HGNC Symbol;Acc:HGNC:2452]	35.6616	48.3502	43.6274	70.3069
ENSG00000120686	UFM1	ubiquitin-fold modifier 1 [Source:HGNC Symbol;Acc:HGNC:20597]	35.6591	16.6858	15.592	14.3543
ENSG00000142864	SERBP1	SERPINE1 mRNA binding protein 1 [Source:HGNC Symbol;Acc:HGNC:17860]	35.647	20.0354	30.0223	19.671
ENSG00000106245	BUD31	BUD31 homolog [Source:HGNC Symbol;Acc:HGNC:29629]	35.6233	41.3707	43.2204	47.0346
ENSG00000108528	SLC25A11	solute carrier family 25 (mitochondrial carrier; oxoglutarate carrier), member 11 [Source:HGNC Symbol;Acc:HGNC:10981]	35.579	51.7635	44.1068	54.5437
ENSG00000119801	YPEL5	yippee-like 5 [Source:HGNC Symbol;Acc:HGNC:18329]	35.5744	15.8066	21.6563	16.968
ENSG00000104679	R3HCC1	R3H domain and coiled-coil containing 1 [Source:HGNC Symbol;Acc:HGNC:27329]	35.5701	18.5111	16.3833	19.5017
ENSG00000148737	TCF7L2	transcription factor 7-like 2 (T-cell specific, HMG-box) [Source:HGNC Symbol;Acc:HGNC:11641]	35.5694	0.866887	1.43327	14.066
ENSG00000075399	VPS9D1	VPS9 domain containing 1 [Source:HGNC Symbol;Acc:HGNC:13526]	35.5619	26.7299	19.1238	17.2098
ENSG00000180398	MCFD2	multiple coagulation factor deficiency 2 [Source:HGNC Symbol;Acc:HGNC:18451]	35.5576	14.4196	13.287	23.2339
ENSG00000166402	TUB	tubby bipartite transcription factor [Source:HGNC Symbol;Acc:HGNC:12406]	35.5388	58.8675	59.8602	26.3983
ENSG00000115806	GORASP2	golgi reassembly stacking protein 2, 55kDa [Source:HGNC Symbol;Acc:HGNC:17500]	35.5312	49.8142	37.2649	55.2661
ENSG00000086015	MAST2	microtubule associated serine/threonine kinase 2 [Source:HGNC Symbol;Acc:HGNC:19035]	35.5133	30.1572	32.3014	25.1444
ENSG00000104872	PIH1D1	PIH1 domain containing 1 [Source:HGNC Symbol;Acc:HGNC:26075]	35.5007	40.959	39.2029	46.984
ENSG00000168092	PAFAH1B2	platelet-activating factor acetylhydrolase 1b, catalytic subunit 2 (30kDa) [Source:HGNC Symbol;Acc:HGNC:8575]	35.4718	65.5359	81.622	74.6795
ENSG00000170515	PA2G4	proliferation-associated 2G4, 38kDa [Source:HGNC Symbol;Acc:HGNC:8550]	35.4646	51.2628	45.8997	57.4883
ENSG00000136758	YME1L1	YME1-like 1 ATPase [Source:HGNC Symbol;Acc:HGNC:12843]	35.463	21.7808	38.5539	30.4096
ENSG00000169813	HNRNPF	heterogeneous nuclear ribonucleoprotein F [Source:HGNC Symbol;Acc:HGNC:5039]	35.4616	12.3381	30.0129	19.4432
ENSG00000184402	SS18L1	synovial sarcoma translocation gene on chromosome 18-like 1 [Source:HGNC Symbol;Acc:HGNC:15592]	35.4577	22.9605	45.6421	20.9112
ENSG00000148248	SURF4	surfeit 4 [Source:HGNC Symbol;Acc:HGNC:11476]	35.4553	32.4476	33.7511	73.2871
ENSG00000103145	HCFC1R1	host cell factor C1 regulator 1 (XPO1 dependent) [Source:HGNC Symbol;Acc:HGNC:21198]	35.4535	76.8408	44.0074	82.9987
ENSG00000106089	STX1A	syntaxin 1A (brain) [Source:HGNC Symbol;Acc:HGNC:11433]	35.4493	142.226	50.7374	39.7996
ENSG00000115944	COX7A2L	cytochrome c oxidase subunit VIIa polypeptide 2 like [Source:HGNC Symbol;Acc:HGNC:2289]	35.4467	68.0782	100.338	88.1703
ENSG00000135097	MSI1	musashi RNA-binding protein 1 [Source:HGNC Symbol;Acc:HGNC:7330]	35.4454	14.1413	19.5372	20.9875
ENSG00000125944	HNRNPR	heterogeneous nuclear ribonucleoprotein R [Source:HGNC Symbol;Acc:HGNC:5047]	35.4432	5.98865	12.3624	6.98797
ENSG00000163001	CFAP36	cilia and flagella associated protein 36 [Source:HGNC Symbol;Acc:HGNC:30540]	35.4348	48.8891	44.6682	38.1241
ENSG00000038382	TRIO	trio Rho guanine nucleotide exchange factor [Source:HGNC Symbol;Acc:HGNC:12303]	35.4251	21.3144	48.5914	17.7341
ENSG00000132646	PCNA	proliferating cell nuclear antigen [Source:HGNC Symbol;Acc:HGNC:8729]	35.4184	23.8525	51.7285	26.6149
ENSG00000109390	NDUFC1	NADH dehydrogenase (ubiquinone) 1, subcomplex unknown, 1, 6kDa [Source:HGNC Symbol;Acc:HGNC:7705]	35.4072	31.3321	27.5653	23.1735
ENSG00000068308	OTUD5	OTU deubiquitinase 5 [Source:HGNC Symbol;Acc:HGNC:25402]	35.399	19.1628	18.575	19.184
ENSG00000184277	TM2D3	TM2 domain containing 3 [Source:HGNC Symbol;Acc:HGNC:24128]	35.3929	11.5455	13.6092	11.7238
ENSG00000172336	POP7	POP7 homolog, ribonuclease P/MRP subunit [Source:HGNC Symbol;Acc:HGNC:19949]	35.3852	18.0432	15.7345	12.1113
ENSG00000162517	PEF1	penta-EF-hand domain containing 1 [Source:HGNC Symbol;Acc:HGNC:30009]	35.3119	14.8725	14.9452	24.5536
ENSG00000139112	GABARAPL1	GABA(A) receptor-associated protein like 1 [Source:HGNC Symbol;Acc:HGNC:4068]	35.2947	158.229	83.5582	107.546
ENSG00000152932	RAB3C	RAB3C, member RAS oncogene family [Source:HGNC Symbol;Acc:HGNC:30269]	35.271	35.7106	33.092	36.0709
ENSG00000106484	MEST	mesoderm specific transcript [Source:HGNC Symbol;Acc:HGNC:7028]	35.2486	11.6319	42.1546	280.632
ENSG00000198689	SLC9A6	solute carrier family 9, subfamily A (NHE6, cation proton antiporter 6), member 6 [Source:HGNC Symbol;Acc:HGNC:11079]	35.2338	41.18	17.8573	37.2853
ENSG00000135127	CCDC64	coiled-coil domain containing 64 [Source:HGNC Symbol;Acc:HGNC:28095]	35.2279	26.9146	18.2101	16.763
ENSG00000070761	CFAP20	cilia and flagella associated protein 20 [Source:HGNC Symbol;Acc:HGNC:29523]	35.2262	36.2349	28.7325	29.2837
ENSG00000110786	PTPN5	protein tyrosine phosphatase, non-receptor type 5 (striatum-enriched) [Source:HGNC Symbol;Acc:HGNC:9657]	35.219	63.6512	25.487	60.7108
ENSG00000107282	APBA1	amyloid beta (A4) precursor protein-binding, family A, member 1 [Source:HGNC Symbol;Acc:HGNC:578]	35.2092	62.4182	24.1709	41.0435
ENSG00000167699	GLOD4	glyoxalase domain containing 4 [Source:HGNC Symbol;Acc:HGNC:14111]	35.1788	8.69792	10.6667	13.579
ENSG00000242372	EIF6	eukaryotic translation initiation factor 6 [Source:HGNC Symbol;Acc:HGNC:6159]	35.1255	35.1536	37.6574	41.0167
ENSG00000142186	SCYL1	SCY1-like, kinase-like 1 [Source:HGNC Symbol;Acc:HGNC:14372]	35.0949	29.0682	27.5843	36.8533
ENSG00000011009	LYPLA2	lysophospholipase II [Source:HGNC Symbol;Acc:HGNC:6738]	35.066	73.3707	32.1771	43.1424
ENSG00000114354	TFG	TRK-fused gene [Source:HGNC Symbol;Acc:HGNC:11758]	35.0659	47.2367	41.7203	59.8125
ENSG00000110367	DDX6	DEAD (Asp-Glu-Ala-Asp) box helicase 6 [Source:HGNC Symbol;Acc:HGNC:2747]	35.0365	24.695	29.9687	55.5651
ENSG00000155508	CNOT8	CCR4-NOT transcription complex, subunit 8 [Source:HGNC Symbol;Acc:HGNC:9207]	34.9949	25.8056	35.8323	31.1453
ENSG00000129245	FXR2	fragile X mental retardation, autosomal homolog 2 [Source:HGNC Symbol;Acc:HGNC:4024]	34.9737	40.2229	42.985	36.8532
ENSG00000159593	NAE1	NEDD8 activating enzyme E1 subunit 1 [Source:HGNC Symbol;Acc:HGNC:621]	34.9728	13.0946	18.4638	14.046
ENSG00000125656	CLPP	caseinolytic mitochondrial matrix peptidase proteolytic subunit [Source:HGNC Symbol;Acc:HGNC:2084]	34.9553	30.8871	25.2667	26.7652
ENSG00000213246	SUPT4H1	suppressor of Ty 4 homolog 1 (S. cerevisiae) [Source:HGNC Symbol;Acc:HGNC:11467]	34.9537	30.1146	30.7611	28.6054
ENSG00000149480	MTA2	metastasis associated 1 family, member 2 [Source:HGNC Symbol;Acc:HGNC:7411]	34.9325	24.5767	43.6165	40.897
ENSG00000168397	ATG4B	autophagy related 4B, cysteine peptidase [Source:HGNC Symbol;Acc:HGNC:20790]	34.9265	17.8956	18.3482	20.4953
ENSG00000117395	EBNA1BP2	EBNA1 binding protein 2 [Source:HGNC Symbol;Acc:HGNC:15531]	34.9223	21.2109	27.4748	18.9185
ENSG00000196937	FAM3C	family with sequence similarity 3, member C [Source:HGNC Symbol;Acc:HGNC:18664]	34.911	26.7809	24.6213	25.7029
ENSG00000205339	IPO7	importin 7 [Source:HGNC Symbol;Acc:HGNC:9852]	34.8954	43.1404	80.2755	51.1647
ENSG00000070610	GBA2	glucosidase, beta (bile acid) 2 [Source:HGNC Symbol;Acc:HGNC:18986]	34.8769	31.7262	24.0001	23.1686
ENSG00000142235	LMTK3	lemur tyrosine kinase 3 [Source:HGNC Symbol;Acc:HGNC:19295]	34.8654	85.7137	26.629	35.348
ENSG00000147955	SIGMAR1	sigma non-opioid intracellular receptor 1 [Source:HGNC Symbol;Acc:HGNC:8157]	34.8068	24.6678	16.5808	31.3175
ENSG00000143870	PDIA6	protein disulfide isomerase family A, member 6 [Source:HGNC Symbol;Acc:HGNC:30168]	34.8061	81.1979	85.4765	85.9588
ENSG00000164615	CAMLG	calcium modulating ligand [Source:HGNC Symbol;Acc:HGNC:1471]	34.8022	29.8157	30.9901	26.9522
ENSG00000094916	CBX5	chromobox homolog 5 [Source:HGNC Symbol;Acc:HGNC:1555]	34.8003	25.8948	65.8478	49.5055
ENSG00000007516	BAIAP3	BAI1-associated protein 3 [Source:HGNC Symbol;Acc:HGNC:948]	34.7936	0.996048	0.615149	4.77088
ENSG00000138095	LRPPRC	leucine-rich pentatricopeptide repeat containing [Source:HGNC Symbol;Acc:HGNC:15714]	34.7723	24.5087	30.7732	23.5391
ENSG00000068912	ERLEC1	endoplasmic reticulum lectin 1 [Source:HGNC Symbol;Acc:HGNC:25222]	34.7601	13.0843	9.95747	26.7913
ENSG00000130520	LSM4	LSM4 homolog, U6 small nuclear RNA and mRNA degradation associated [Source:HGNC Symbol;Acc:HGNC:17259]	34.7579	37.5058	28.8704	25.1767
ENSG00000198231	DDX42	DEAD (Asp-Glu-Ala-Asp) box helicase 42 [Source:HGNC Symbol;Acc:HGNC:18676]	34.7521	28.1307	41.06	34.3433
ENSG00000162191	UBXN1	UBX domain protein 1 [Source:HGNC Symbol;Acc:HGNC:18402]	34.7489	58.7123	71.3555	66.3586
ENSG00000131475	VPS25	vacuolar protein sorting 25 homolog (S. cerevisiae) [Source:HGNC Symbol;Acc:HGNC:28122]	34.6952	1.82455	0.704445	0.864524
ENSG00000123159	GIPC1	GIPC PDZ domain containing family, member 1 [Source:HGNC Symbol;Acc:HGNC:1226]	34.6921	40.2893	34.9628	34.4369
ENSG00000179195	ZNF664	zinc finger protein 664 [Source:HGNC Symbol;Acc:HGNC:25406]	34.687	18.5954	21.386	32.926
ENSG00000198218	QRICH1	glutamine-rich 1 [Source:HGNC Symbol;Acc:HGNC:24713]	34.6554	26.344	58.944	34.7591
ENSG00000170906	NDUFA3	NADH dehydrogenase (ubiquinone) 1 alpha subcomplex, 3, 9kDa [Source:HGNC Symbol;Acc:HGNC:7686]	34.637	47.8005	52.3445	52.9995
ENSG00000234741	GAS5	growth arrest-specific 5 (non-protein coding) [Source:HGNC Symbol;Acc:HGNC:16355]	34.6234	24.4988	59.5143	37.6519
ENSG00000100353	EIF3D	eukaryotic translation initiation factor 3, subunit D [Source:HGNC Symbol;Acc:HGNC:3278]	34.5971	34.2404	45.9493	50.8857
ENSG00000128463	EMC4	ER membrane protein complex subunit 4 [Source:HGNC Symbol;Acc:HGNC:28032]	34.5875	70.7849	36.4459	56.8063
ENSG00000162430	SEPN1	selenoprotein N, 1 [Source:HGNC Symbol;Acc:HGNC:15999]	34.5532	8.12395	13.526	30.9579
ENSG00000006451	RALA	v-ral simian leukemia viral oncogene homolog A (ras related) [Source:HGNC Symbol;Acc:HGNC:9839]	34.5517	76.5357	77.7351	56.179
ENSG00000141858	SAMD1	sterile alpha motif domain containing 1 [Source:HGNC Symbol;Acc:HGNC:17958]	34.5421	17.1803	22.7605	13.1736
ENSG00000071127	WDR1	WD repeat domain 1 [Source:HGNC Symbol;Acc:HGNC:12754]	34.5375	53.6346	69.3318	53.5005
ENSG00000175348	TMEM9B	TMEM9 domain family, member B [Source:HGNC Symbol;Acc:HGNC:1168]	34.5357	44.6175	30.9821	37.3209
ENSG00000122042	UBL3	ubiquitin-like 3 [Source:HGNC Symbol;Acc:HGNC:12504]	34.5259	17.6011	16.4642	12.2366
ENSG00000078808	SDF4	stromal cell derived factor 4 [Source:HGNC Symbol;Acc:HGNC:24188]	34.5112	23.7314	18.5656	36.4178
ENSG00000136143	SUCLA2	succinate-CoA ligase, ADP-forming, beta subunit [Source:HGNC Symbol;Acc:HGNC:11448]	34.4954	59.2536	37.7732	39.8338
ENSG00000186184	POLR1D	polymerase (RNA) I polypeptide D, 16kDa [Source:HGNC Symbol;Acc:HGNC:20422]	34.4902	30.2104	35.2595	22.8006
ENSG00000243279	PRAF2	PRA1 domain family, member 2 [Source:HGNC Symbol;Acc:HGNC:28911]	34.4673	47.3766	34.7816	41.1867
ENSG00000090266	NDUFB2	NADH dehydrogenase (ubiquinone) 1 beta subcomplex, 2, 8kDa [Source:HGNC Symbol;Acc:HGNC:7697]	34.4612	10.3228	8.08408	9.16955
ENSG00000169217	CD2BP2	CD2 (cytoplasmic tail) binding protein 2 [Source:HGNC Symbol;Acc:HGNC:1656]	34.4406	17.4434	30.0965	27.6163
ENSG00000205629	LCMT1	leucine carboxyl methyltransferase 1 [Source:HGNC Symbol;Acc:HGNC:17557]	34.4387	48.7139	47.2197	36.1116
ENSG00000198752	CDC42BPB	CDC42 binding protein kinase beta (DMPK-like) [Source:HGNC Symbol;Acc:HGNC:1738]	34.4202	40.5872	27.2028	28.3622
ENSG00000110514	MADD	MAP-kinase activating death domain [Source:HGNC Symbol;Acc:HGNC:6766]	34.4119	35.3104	26.2071	23.2257
ENSG00000130396	MLLT4	myeloid/lymphoid or mixed-lineage leukemia; translocated to, 4 [Source:HGNC Symbol;Acc:HGNC:7137]	34.3995	21.9419	34.098	21.599
ENSG00000102858	MGRN1	mahogunin ring finger 1, E3 ubiquitin protein ligase [Source:HGNC Symbol;Acc:HGNC:20254]	34.3945	56.702	42.1329	55.2154
ENSG00000131238	PPT1	palmitoyl-protein thioesterase 1 [Source:HGNC Symbol;Acc:HGNC:9325]	34.3622	24.7812	29.6935	49.4238
ENSG00000105671	DDX49	DEAD (Asp-Glu-Ala-Asp) box polypeptide 49 [Source:HGNC Symbol;Acc:HGNC:18684]	34.3619	11.3216	11.5776	9.05672
ENSG00000196914	ARHGEF12	Rho guanine nucleotide exchange factor (GEF) 12 [Source:HGNC Symbol;Acc:HGNC:14193]	34.3567	24.7347	35.6886	20.9109
ENSG00000078304	PPP2R5C	protein phosphatase 2, regulatory subunit B', gamma [Source:HGNC Symbol;Acc:HGNC:9311]	34.3505	37.4277	36.1241	35.1255
ENSG00000214022	REPIN1	replication initiator 1 [Source:HGNC Symbol;Acc:HGNC:17922]	34.3101	5.06147	8.61087	8.24736
ENSG00000120860	CCDC53	coiled-coil domain containing 53 [Source:HGNC Symbol;Acc:HGNC:24256]	34.31	3.2657	4.12	5.15253
ENSG00000072803	FBXW11	F-box and WD repeat domain containing 11 [Source:HGNC Symbol;Acc:HGNC:13607]	34.2914	37.2556	43.9026	43.635
ENSG00000187122	SLIT1	slit guidance ligand 1 [Source:HGNC Symbol;Acc:HGNC:11085]	34.2714	19.7771	12.0704	12.9174
ENSG00000104936	DMPK	dystrophia myotonica-protein kinase [Source:HGNC Symbol;Acc:HGNC:2933]	34.262	10.2382	6.52462	9.85737
ENSG00000141959	PFKL	phosphofructokinase, liver [Source:HGNC Symbol;Acc:HGNC:8876]	34.2375	64.6139	24.1376	63.2588
ENSG00000169223	LMAN2	lectin, mannose-binding 2 [Source:HGNC Symbol;Acc:HGNC:16986]	34.2322	16.3793	19.5313	25.7115
ENSG00000067829	IDH3G	isocitrate dehydrogenase 3 (NAD+) gamma [Source:HGNC Symbol;Acc:HGNC:5386]	34.1953	41.6919	41.9479	37.1064
ENSG00000224078	SNHG14	small nucleolar RNA host gene 14 [Source:HGNC Symbol;Acc:HGNC:37462]	34.1768	15.0252	32.813	9.25148
ENSG00000163541	SUCLG1	succinate-CoA ligase, alpha subunit [Source:HGNC Symbol;Acc:HGNC:11449]	34.1645	22.513	19.7639	25.7454
ENSG00000135821	GLUL	glutamate-ammonia ligase [Source:HGNC Symbol;Acc:HGNC:4341]	34.1186	158.697	141.91	99.2199
ENSG00000182175	RGMA	repulsive guidance molecule family member a [Source:HGNC Symbol;Acc:HGNC:30308]	34.1072	48.6276	21.0978	45.8967
ENSG00000004534	RBM6	RNA binding motif protein 6 [Source:HGNC Symbol;Acc:HGNC:9903]	34.0999	14.9885	32.4988	20.5561
ENSG00000250510	GPR162	G protein-coupled receptor 162 [Source:HGNC Symbol;Acc:HGNC:16693]	34.098	54.9713	27.151	23.937
ENSG00000143093	STRIP1	striatin interacting protein 1 [Source:HGNC Symbol;Acc:HGNC:25916]	34.0865	56.4993	50.1836	49.4248
ENSG00000179262	RAD23A	RAD23 homolog A, nucleotide excision repair protein [Source:HGNC Symbol;Acc:HGNC:9812]	34.0864	15.4836	12.8914	14.1246
ENSG00000242173	ARHGDIG	Rho GDP dissociation inhibitor (GDI) gamma [Source:HGNC Symbol;Acc:HGNC:680]	34.0783	41.6799	15.8166	19.1898
ENSG00000114120	SLC25A36	solute carrier family 25 (pyrimidine nucleotide carrier), member 36 [Source:HGNC Symbol;Acc:HGNC:25554]	34.0583	18.5841	26.9469	21.1547
ENSG00000138175	ARL3	ADP-ribosylation factor-like 3 [Source:HGNC Symbol;Acc:HGNC:694]	34.0521	76.3165	61.1437	57.6713
ENSG00000167861	HID1	HID1 domain containing [Source:HGNC Symbol;Acc:HGNC:15736]	34.0521	27.1498	13.7698	26.6588
ENSG00000188986	NELFB	negative elongation factor complex member B [Source:HGNC Symbol;Acc:HGNC:24324]	34.0413	23.1473	26.8142	30.1158
ENSG00000166710	B2M	beta-2-microglobulin [Source:HGNC Symbol;Acc:HGNC:914]	34.017	26.1214	40.5858	131.138
ENSG00000148925	BTBD10	BTB (POZ) domain containing 10 [Source:HGNC Symbol;Acc:HGNC:21445]	33.997	31.1246	28.0869	21.4614
ENSG00000177380	PPFIA3	protein tyrosine phosphatase, receptor type, f polypeptide (PTPRF), interacting protein (liprin), alpha 3 [Source:HGNC Symbol;Acc:HGNC:9247]	33.9714	37.3617	23.4624	18.2587
ENSG00000151778	SERP2	stress-associated endoplasmic reticulum protein family member 2 [Source:HGNC Symbol;Acc:HGNC:20607]	33.9545	95.416	49.5518	30.6153
ENSG00000084754	HADHA	hydroxyacyl-CoA dehydrogenase/3-ketoacyl-CoA thiolase/enoyl-CoA hydratase (trifunctional protein), alpha subunit [Source:HGNC Symbol;Acc:HGNC:4801]	33.9513	12.0583	22.1805	26.8566
ENSG00000184524	CEND1	cell cycle exit and neuronal differentiation 1 [Source:HGNC Symbol;Acc:HGNC:24153]	33.9505	108.616	31.8286	73.1473
ENSG00000116586	LAMTOR2	late endosomal/lysosomal adaptor, MAPK and MTOR activator 2 [Source:HGNC Symbol;Acc:HGNC:29796]	33.9329	60.0907	41.9057	43.9793
ENSG00000159346	ADIPOR1	adiponectin receptor 1 [Source:HGNC Symbol;Acc:HGNC:24040]	33.9282	25.0497	26.239	33.8484
ENSG00000123933	MXD4	MAX dimerization protein 4 [Source:HGNC Symbol;Acc:HGNC:13906]	33.9199	14.2995	22.4795	29.0454
ENSG00000146007	ZMAT2	zinc finger, matrin-type 2 [Source:HGNC Symbol;Acc:HGNC:26433]	33.919	58.4376	51.138	36.7931
ENSG00000147677	EIF3H	eukaryotic translation initiation factor 3, subunit H [Source:HGNC Symbol;Acc:HGNC:3273]	33.9153	105.024	126.522	145.645
ENSG00000106330	MOSPD3	motile sperm domain containing 3 [Source:HGNC Symbol;Acc:HGNC:25078]	33.9134	21.0349	2.99858	19.8816
ENSG00000124795	DEK	DEK proto-oncogene [Source:HGNC Symbol;Acc:HGNC:2768]	33.892	24.2298	42.0668	29.4944
ENSG00000198900	TOP1	topoisomerase (DNA) I [Source:HGNC Symbol;Acc:HGNC:11986]	33.8813	37.2301	60.5667	44.654
ENSG00000135503	ACVR1B	activin A receptor, type IB [Source:HGNC Symbol;Acc:HGNC:172]	33.8765	39.306	28.4009	31.082
ENSG00000063015	SEZ6	seizure related 6 homolog (mouse) [Source:HGNC Symbol;Acc:HGNC:15955]	33.8645	80.8009	29.0932	19.6753
ENSG00000144021	CIAO1	cytosolic iron-sulfur assembly component 1 [Source:HGNC Symbol;Acc:HGNC:14280]	33.8594	14.2717	15.8078	14.5199
ENSG00000066136	NFYC	nuclear transcription factor Y, gamma [Source:HGNC Symbol;Acc:HGNC:7806]	33.8315	14.3052	21.3827	19.7644
ENSG00000171206	TRIM8	tripartite motif containing 8 [Source:HGNC Symbol;Acc:HGNC:15579]	33.8244	32.2369	29.9391	20.5519
ENSG00000173020	ADRBK1	adrenergic, beta, receptor kinase 1 [Source:HGNC Symbol;Acc:HGNC:289]	33.8113	55.2842	34.4195	36.9094
ENSG00000168758	SEMA4C	sema domain, immunoglobulin domain (Ig), transmembrane domain (TM) and short cytoplasmic domain, (semaphorin) 4C [Source:HGNC Symbol;Acc:HGNC:10731]	33.785	12.6757	22.3279	15.335
ENSG00000138674	SEC31A	SEC31 homolog A, COPII coating complex component [Source:HGNC Symbol;Acc:HGNC:17052]	33.7664	25.8869	25.9459	53.33
ENSG00000029363	BCLAF1	BCL2-associated transcription factor 1 [Source:HGNC Symbol;Acc:HGNC:16863]	33.7537	28.9267	67.1951	41.6035
ENSG00000137100	DCTN3	dynactin 3 (p22) [Source:HGNC Symbol;Acc:HGNC:2713]	33.7481	103.492	87.5551	53.7519
ENSG00000143368	SF3B4	splicing factor 3b, subunit 4, 49kDa [Source:HGNC Symbol;Acc:HGNC:10771]	33.7166	20.8093	11.7549	25.3511
ENSG00000141480	ARRB2	arrestin, beta 2 [Source:HGNC Symbol;Acc:HGNC:712]	33.6843	24.9911	23.7743	33.3282
ENSG00000100592	DAAM1	dishevelled associated activator of morphogenesis 1 [Source:HGNC Symbol;Acc:HGNC:18142]	33.6837	37.2248	62.6469	33.9978
ENSG00000142669	SH3BGRL3	SH3 domain binding glutamate-rich protein like 3 [Source:HGNC Symbol;Acc:HGNC:15568]	33.668	108.639	52.6129	71.4297
ENSG00000140943	MBTPS1	membrane-bound transcription factor peptidase, site 1 [Source:HGNC Symbol;Acc:HGNC:15456]	33.6535	18.3164	28.5353	45.55
ENSG00000168958	MFF	mitochondrial fission factor [Source:HGNC Symbol;Acc:HGNC:24858]	33.6518	52.0181	52.3496	45.7339
ENSG00000119689	DLST	dihydrolipoamide S-succinyltransferase (E2 component of 2-oxo-glutarate complex) [Source:HGNC Symbol;Acc:HGNC:2911]	33.623	51.805	46.0655	58.9027
ENSG00000183726	TMEM50A	transmembrane protein 50A [Source:HGNC Symbol;Acc:HGNC:30590]	33.6009	77.3549	57.356	57.0026
ENSG00000104722	NEFM	neurofilament, medium polypeptide [Source:HGNC Symbol;Acc:HGNC:7734]	33.5955	26.5245	8.92974	45.2223
ENSG00000107175	CREB3	cAMP responsive element binding protein 3 [Source:HGNC Symbol;Acc:HGNC:2347]	33.554	21.7108	22.5168	27.4884
ENSG00000180900	SCRIB	scribbled planar cell polarity protein [Source:HGNC Symbol;Acc:HGNC:30377]	33.5327	16.5446	20.9738	16.488
ENSG00000177963	RIC8A	RIC8 guanine nucleotide exchange factor A [Source:HGNC Symbol;Acc:HGNC:29550]	33.4899	33.2617	27.5153	23.0971
ENSG00000176454	LPCAT4	lysophosphatidylcholine acyltransferase 4 [Source:HGNC Symbol;Acc:HGNC:30059]	33.4852	25.129	6.96499	12.3423
ENSG00000175573	C11orf68	chromosome 11 open reading frame 68 [Source:HGNC Symbol;Acc:HGNC:28801]	33.4754	31.8232	21.8029	31.9946
ENSG00000167674	HDGFRP2	Hepatoma-derived growth factor-related protein 2 [Source:UniProtKB/Swiss-Prot;Acc:Q7Z4V5]	33.4718	41.4403	45.0108	34.2912
ENSG00000158470	B4GALT5	UDP-Gal:betaGlcNAc beta 1,4- galactosyltransferase, polypeptide 5 [Source:HGNC Symbol;Acc:HGNC:928]	33.4709	14.5433	14.2588	11.8009
ENSG00000197006	METTL9	methyltransferase like 9 [Source:HGNC Symbol;Acc:HGNC:24586]	33.4615	36.6483	55.2176	54.883
ENSG00000166136	NDUFB8	NADH dehydrogenase (ubiquinone) 1 beta subcomplex, 8, 19kDa [Source:HGNC Symbol;Acc:HGNC:7703]	33.4435	39.2508	34.3689	41.0093
ENSG00000254726	MEX3A	mex-3 RNA binding family member A [Source:HGNC Symbol;Acc:HGNC:33482]	33.4187	14.3931	30.9306	18.922
ENSG00000183172	SMDT1	single-pass membrane protein with aspartate-rich tail 1 [Source:HGNC Symbol;Acc:HGNC:25055]	33.4113	107.9	78.1753	82.3899
ENSG00000079102	RUNX1T1	runt-related transcription factor 1; translocated to, 1 (cyclin D-related) [Source:HGNC Symbol;Acc:HGNC:1535]	33.4101	7.65172	21.9734	12.7746
ENSG00000143061	IGSF3	immunoglobulin superfamily, member 3 [Source:HGNC Symbol;Acc:HGNC:5950]	33.3956	11.682	28.3638	16.0743
ENSG00000164828	SUN1	Sad1 and UNC84 domain containing 1 [Source:HGNC Symbol;Acc:HGNC:18587]	33.3624	19.0759	23.8176	18.3381
ENSG00000086232	EIF2AK1	eukaryotic translation initiation factor 2-alpha kinase 1 [Source:HGNC Symbol;Acc:HGNC:24921]	33.3556	17.7249	11.5213	14.9176
ENSG00000160285	LSS	lanosterol synthase (2,3-oxidosqualene-lanosterol cyclase) [Source:HGNC Symbol;Acc:HGNC:6708]	33.3431	24.1996	19.1554	20.8689
ENSG00000101198	NKAIN4	Na+/K+ transporting ATPase interacting 4 [Source:HGNC Symbol;Acc:HGNC:16191]	33.3409	12.8605	13.7405	16.4124
ENSG00000133026	MYH10	myosin, heavy chain 10, non-muscle [Source:HGNC Symbol;Acc:HGNC:7568]	33.3305	53.8072	93.9175	37.8585
ENSG00000145494	NDUFS6	NADH dehydrogenase (ubiquinone) Fe-S protein 6, 13kDa (NADH-coenzyme Q reductase) [Source:HGNC Symbol;Acc:HGNC:7713]	33.3078	61.6977	61.1534	53.6416
ENSG00000198492	YTHDF2	YTH N(6)-methyladenosine RNA binding protein 2 [Source:HGNC Symbol;Acc:HGNC:31675]	33.3034	13.0432	33.3844	15.5231
ENSG00000169740	ZNF32	zinc finger protein 32 [Source:HGNC Symbol;Acc:HGNC:13095]	33.2878	25.1321	32.2263	22.1598
ENSG00000127540	UQCR11	ubiquinol-cytochrome c reductase, complex III subunit XI [Source:HGNC Symbol;Acc:HGNC:30862]	33.2744	130.389	109.691	71.2059
ENSG00000167100	SAMD14	sterile alpha motif domain containing 14 [Source:HGNC Symbol;Acc:HGNC:27312]	33.2629	91.2443	45.7302	75.9276
ENSG00000172057	ORMDL3	ORMDL sphingolipid biosynthesis regulator 3 [Source:HGNC Symbol;Acc:HGNC:16038]	33.2548	34.6181	44.3378	45.8895
ENSG00000129083	COPB1	coatomer protein complex, subunit beta 1 [Source:HGNC Symbol;Acc:HGNC:2231]	33.1916	28.9481	42.1571	53.2956
ENSG00000065518	NDUFB4	NADH dehydrogenase (ubiquinone) 1 beta subcomplex, 4, 15kDa [Source:HGNC Symbol;Acc:HGNC:7699]	33.1746	29.1133	33.4601	19.0664
ENSG00000100243	CYB5R3	cytochrome b5 reductase 3 [Source:HGNC Symbol;Acc:HGNC:2873]	33.1733	54.9103	36.2489	71.1252
ENSG00000177542	SLC25A22	solute carrier family 25 (mitochondrial carrier: glutamate), member 22 [Source:HGNC Symbol;Acc:HGNC:19954]	33.1686	59.9242	13.1301	15.3416
ENSG00000182667	NTM	neurotrimin [Source:HGNC Symbol;Acc:HGNC:17941]	33.1064	89.0383	66.8709	53.5932
ENSG00000124181	PLCG1	phospholipase C, gamma 1 [Source:HGNC Symbol;Acc:HGNC:9065]	33.0934	30.9514	47.3501	31.6605
ENSG00000233276	GPX1	glutathione peroxidase 1 [Source:HGNC Symbol;Acc:HGNC:4553]	33.0862	28.0095	29.7326	54.3898
ENSG00000083444	PLOD1	procollagen-lysine, 2-oxoglutarate 5-dioxygenase 1 [Source:HGNC Symbol;Acc:HGNC:9081]	33.0625	3.43202	5.16578	33.6352
ENSG00000139998	RAB15	RAB15, member RAS oncogene family [Source:HGNC Symbol;Acc:HGNC:20150]	33.0568	41.4841	18.7115	19.1468
ENSG00000109685	WHSC1	Wolf-Hirschhorn syndrome candidate 1 [Source:HGNC Symbol;Acc:HGNC:12766]	33.0352	29.7433	52.5962	33.2345
ENSG00000166887	VPS39	vacuolar protein sorting 39 homolog (S. cerevisiae) [Source:HGNC Symbol;Acc:HGNC:20593]	33.0343	12.8166	17.3579	14.0349
ENSG00000103653	CSK	c-src tyrosine kinase [Source:HGNC Symbol;Acc:HGNC:2444]	33.0105	40.9491	38.8948	36.0707
ENSG00000104823	ECH1	enoyl CoA hydratase 1, peroxisomal [Source:HGNC Symbol;Acc:HGNC:3149]	32.9997	22.6747	23.5575	45.1022
ENSG00000198843	SELT	SELT protein; Selenoprotein T; cDNA FLJ90525 fis, clone NT2RP4001001, highly similar to Selenoprotein T [Source:UniProtKB/TrEMBL;Acc:Q6IAK0]	32.9928	79.7515	44.3827	71.2967
ENSG00000108055	SMC3	structural maintenance of chromosomes 3 [Source:HGNC Symbol;Acc:HGNC:2468]	32.9783	16.1617	39.9166	23.5998
ENSG00000172992	DCAKD	dephospho-CoA kinase domain containing [Source:HGNC Symbol;Acc:HGNC:26238]	32.9542	56.9303	34.4561	73.6472
ENSG00000185800	DMWD	dystrophia myotonica, WD repeat containing [Source:HGNC Symbol;Acc:HGNC:2936]	32.9518	62.2333	39.4495	39.4689
ENSG00000137710	RDX	radixin [Source:HGNC Symbol;Acc:HGNC:9944]	32.9311	19.323	45.9462	35.4755
ENSG00000140545	MFGE8	milk fat globule-EGF factor 8 protein [Source:HGNC Symbol;Acc:HGNC:7036]	32.9294	69.6457	137.505	46.2174
ENSG00000004478	FKBP4	FK506 binding protein 4, 59kDa [Source:HGNC Symbol;Acc:HGNC:3720]	32.9285	58.821	70.6325	62.7681
ENSG00000120875	DUSP4	dual specificity phosphatase 4 [Source:HGNC Symbol;Acc:HGNC:3070]	32.9056	15.9389	9.31511	15.3521
ENSG00000197535	MYO5A	myosin VA (heavy chain 12, myoxin) [Source:HGNC Symbol;Acc:HGNC:7602]	32.9024	46.4231	37.5717	27.1281
ENSG00000107581	EIF3A	eukaryotic translation initiation factor 3, subunit A [Source:HGNC Symbol;Acc:HGNC:3271]	32.8973	54.4307	66.8833	65.3735
ENSG00000196781	TLE1	transducin-like enhancer of split 1 (E(sp1) homolog, Drosophila) [Source:HGNC Symbol;Acc:HGNC:11837]	32.8863	19.8278	28.1822	13.9409
ENSG00000171720	HDAC3	histone deacetylase 3 [Source:HGNC Symbol;Acc:HGNC:4854]	32.8758	32.1323	30.8325	33.3939
ENSG00000165724	ZMYND19	zinc finger, MYND-type containing 19 [Source:HGNC Symbol;Acc:HGNC:21146]	32.836	16.2394	15.8438	13.1909
ENSG00000136628	EPRS	glutamyl-prolyl-tRNA synthetase [Source:HGNC Symbol;Acc:HGNC:3418]	32.8187	30.6587	53.0828	50.4831
ENSG00000198892	SHISA4	shisa family member 4 [Source:HGNC Symbol;Acc:HGNC:27139]	32.7948	26.555	19.579	20.842
ENSG00000127419	TMEM175	transmembrane protein 175 [Source:HGNC Symbol;Acc:HGNC:28709]	32.7809	6.72177	5.05451	6.31895
ENSG00000243335	KCTD7	potassium channel tetramerization domain containing 7 [Source:HGNC Symbol;Acc:HGNC:21957]	32.7728	6.6567	4.81759	6.36998
ENSG00000185630	PBX1	pre-B-cell leukemia homeobox 1 [Source:HGNC Symbol;Acc:HGNC:8632]	32.7623	42.3044	41.1109	39.7777
ENSG00000158941	CCAR2	cell cycle and apoptosis regulator 2 [Source:HGNC Symbol;Acc:HGNC:23360]	32.7466	31.7538	48.9632	29.2365
ENSG00000132305	IMMT	inner membrane protein, mitochondrial [Source:HGNC Symbol;Acc:HGNC:6047]	32.7455	47.6757	55.9079	55.9636
ENSG00000126602	TRAP1	TNF receptor-associated protein 1 [Source:HGNC Symbol;Acc:HGNC:16264]	32.7334	23.5497	23.2333	24.7708
ENSG00000113108	APBB3	amyloid beta (A4) precursor protein-binding, family B, member 3 [Source:HGNC Symbol;Acc:HGNC:20708]	32.7316	28.5185	24.6913	33.0862
ENSG00000188529	SRSF10	serine/arginine-rich splicing factor 10 [Source:HGNC Symbol;Acc:HGNC:16713]	32.7303	18.6514	44.706	24.9421
ENSG00000165264	NDUFB6	NADH dehydrogenase (ubiquinone) 1 beta subcomplex, 6, 17kDa [Source:HGNC Symbol;Acc:HGNC:7701]	32.7294	83.4866	46.1305	55.7996
ENSG00000167972	ABCA3	ATP-binding cassette, sub-family A (ABC1), member 3 [Source:HGNC Symbol;Acc:HGNC:33]	32.7223	37.6682	22.6031	27.5299
ENSG00000131089	ARHGEF9	Cdc42 guanine nucleotide exchange factor (GEF) 9 [Source:HGNC Symbol;Acc:HGNC:14561]	32.7189	28.5761	12.6122	15.8702
ENSG00000123983	ACSL3	acyl-CoA synthetase long-chain family member 3 [Source:HGNC Symbol;Acc:HGNC:3570]	32.7011	47.7566	33.1467	39.3864
ENSG00000139624	CERS5	ceramide synthase 5 [Source:HGNC Symbol;Acc:HGNC:23749]	32.69	24.8959	24.1783	25.7198
ENSG00000141425	RPRD1A	regulation of nuclear pre-mRNA domain containing 1A [Source:HGNC Symbol;Acc:HGNC:25560]	32.6884	16.1625	13.233	9.86256
ENSG00000087088	BAX	BCL2-associated X protein [Source:HGNC Symbol;Acc:HGNC:959]	32.6626	83.087	65.2608	69.5631
ENSG00000224531	SMIM13	small integral membrane protein 13 [Source:HGNC Symbol;Acc:HGNC:27356]	32.6409	39.9183	27.8226	21.8078
ENSG00000137776	SLTM	SAFB-like, transcription modulator [Source:HGNC Symbol;Acc:HGNC:20709]	32.6388	25.1779	31.4402	22.476
ENSG00000123384	LRP1	low density lipoprotein receptor-related protein 1 [Source:HGNC Symbol;Acc:HGNC:6692]	32.6139	28.1704	42.1517	37.7225
ENSG00000123136	DDX39A	DEAD (Asp-Glu-Ala-Asp) box polypeptide 39A [Source:HGNC Symbol;Acc:HGNC:17821]	32.5814	8.95278	12.4611	9.61529
ENSG00000104164	BLOC1S6	biogenesis of lysosomal organelles complex-1, subunit 6, pallidin [Source:HGNC Symbol;Acc:HGNC:8549]	32.579	31.0655	21.1452	23.9451
ENSG00000099949	LZTR1	leucine-zipper-like transcription regulator 1 [Source:HGNC Symbol;Acc:HGNC:6742]	32.5711	56.3545	49.978	31.812
ENSG00000184014	DENND5A	DENN/MADD domain containing 5A [Source:HGNC Symbol;Acc:HGNC:19344]	32.5641	31.2115	59.0311	44.7229
ENSG00000117713	ARID1A	AT rich interactive domain 1A (SWI-like) [Source:HGNC Symbol;Acc:HGNC:11110]	32.5582	23.8861	13.2005	27.8599
ENSG00000136848	DAB2IP	DAB2 interacting protein [Source:HGNC Symbol;Acc:HGNC:17294]	32.5161	25.2489	24.4875	21.518
ENSG00000109572	CLCN3	chloride channel, voltage-sensitive 3 [Source:HGNC Symbol;Acc:HGNC:2021]	32.5114	26.7017	30.3569	24.8696
ENSG00000063322	MED29	mediator complex subunit 29 [Source:HGNC Symbol;Acc:HGNC:23074]	32.5023	10.2828	10.1828	11.2727
ENSG00000144119	C1QL2	complement component 1, q subcomponent-like 2 [Source:HGNC Symbol;Acc:HGNC:24181]	32.4784	0.611052	0.159547	1.18682
ENSG00000139637	C12orf10	chromosome 12 open reading frame 10 [Source:HGNC Symbol;Acc:HGNC:17590]	32.4713	13.9226	15.8083	16.077
ENSG00000165023	DIRAS2	DIRAS family, GTP-binding RAS-like 2 [Source:HGNC Symbol;Acc:HGNC:19323]	32.4522	76.7925	14.8185	12.028
ENSG00000176022	B3GALT6	UDP-Gal:betaGal beta 1,3-galactosyltransferase polypeptide 6 [Source:HGNC Symbol;Acc:HGNC:17978]	32.4403	6.08355	7.989	5.44588
ENSG00000196700	ZNF512B	zinc finger protein 512B [Source:HGNC Symbol;Acc:HGNC:29212]	32.4343	31.0545	30.8664	34.0326
ENSG00000198795	ZNF521	zinc finger protein 521 [Source:HGNC Symbol;Acc:HGNC:24605]	32.3956	1.42572	4.09983	18.4234
ENSG00000107263	RAPGEF1	Rap guanine nucleotide exchange factor (GEF) 1 [Source:HGNC Symbol;Acc:HGNC:4568]	32.3738	35.2579	25.5706	26.2452
ENSG00000119682	AREL1	apoptosis resistant E3 ubiquitin protein ligase 1 [Source:HGNC Symbol;Acc:HGNC:20363]	32.3609	23.7392	30.7589	23.2507
ENSG00000058404	CAMK2B	calcium/calmodulin-dependent protein kinase II beta [Source:HGNC Symbol;Acc:HGNC:1461]	32.3323	232.59	135.049	60.875
ENSG00000055130	CUL1	cullin 1 [Source:HGNC Symbol;Acc:HGNC:2551]	32.2928	49.5257	66.0051	54.6075
ENSG00000167889	MGAT5B	mannosyl (alpha-1,6-)-glycoprotein beta-1,6-N-acetyl-glucosaminyltransferase, isozyme B [Source:HGNC Symbol;Acc:HGNC:24140]	32.2894	33.3733	32.3626	16.4556
ENSG00000103194	USP10	ubiquitin specific peptidase 10 [Source:HGNC Symbol;Acc:HGNC:12608]	32.2879	22.559	23.8279	23.8168
ENSG00000159200	RCAN1	regulator of calcineurin 1 [Source:HGNC Symbol;Acc:HGNC:3040]	32.286	26.2853	26.9062	30.3778
ENSG00000169062	UPF3A	UPF3 regulator of nonsense transcripts homolog A (yeast) [Source:HGNC Symbol;Acc:HGNC:20332]	32.2738	24.5602	24.1612	22.075
ENSG00000188243	COMMD6	COMM domain containing 6 [Source:HGNC Symbol;Acc:HGNC:24015]	32.2664	16.6303	15.8993	18.4386
ENSG00000112110	MRPL18	mitochondrial ribosomal protein L18 [Source:HGNC Symbol;Acc:HGNC:14477]	32.2584	19.103	25.8349	22.1381
ENSG00000101958	GLRA2	glycine receptor, alpha 2 [Source:HGNC Symbol;Acc:HGNC:4327]	32.2557	21.0447	21.4216	19.2736
ENSG00000169139	UBE2V2	ubiquitin-conjugating enzyme E2 variant 2 [Source:HGNC Symbol;Acc:HGNC:12495]	32.2448	11.2412	12.6579	9.41785
ENSG00000102119	EMD	emerin [Source:HGNC Symbol;Acc:HGNC:3331]	32.243	28.3716	20.9145	27.2703
ENSG00000160714	UBE2Q1	ubiquitin-conjugating enzyme E2Q family member 1 [Source:HGNC Symbol;Acc:HGNC:15698]	32.2341	32.4374	28.0581	30.7834
ENSG00000147162	OGT	O-linked N-acetylglucosamine (GlcNAc) transferase [Source:HGNC Symbol;Acc:HGNC:8127]	32.2301	58.3467	66.8953	54.8731
ENSG00000198856	OSTC	oligosaccharyltransferase complex subunit (non-catalytic) [Source:HGNC Symbol;Acc:HGNC:24448]	32.2157	27.3759	33.9921	45.7368
ENSG00000104671	DCTN6	dynactin 6 [Source:HGNC Symbol;Acc:HGNC:16964]	32.214	46.7133	36.1044	36.3094
ENSG00000089486	CDIP1	cell death-inducing p53 target 1 [Source:HGNC Symbol;Acc:HGNC:13234]	32.2113	32.9413	24.7371	35.03
ENSG00000107643	MAPK8	mitogen-activated protein kinase 8 [Source:HGNC Symbol;Acc:HGNC:6881]	32.2044	44.4874	52.111	19.8275
ENSG00000037042	TUBG2	tubulin, gamma 2 [Source:HGNC Symbol;Acc:HGNC:12419]	32.1787	15.7535	5.42389	9.59948
ENSG00000161202	DVL3	dishevelled segment polarity protein 3 [Source:HGNC Symbol;Acc:HGNC:3087]	32.1667	31.3043	8.07849	25.8942
ENSG00000106052	TAX1BP1	Tax1 (human T-cell leukemia virus type I) binding protein 1 [Source:HGNC Symbol;Acc:HGNC:11575]	32.1567	32.1041	45.0578	43.2338
ENSG00000261236	BOP1	block of proliferation 1 [Source:HGNC Symbol;Acc:HGNC:15519]	32.1366	29.2188	24.406	19.0028
ENSG00000121989	ACVR2A	activin A receptor, type IIA [Source:HGNC Symbol;Acc:HGNC:173]	32.133	20.9706	37.5106	24.1602
ENSG00000187555	USP7	ubiquitin specific peptidase 7 (herpes virus-associated) [Source:HGNC Symbol;Acc:HGNC:12630]	32.1142	38.4151	61.1756	38.1841
ENSG00000147164	SNX12	sorting nexin 12 [Source:HGNC Symbol;Acc:HGNC:14976]	32.1088	20.3412	19.5691	19.3755
ENSG00000139737	SLAIN1	SLAIN motif family, member 1 [Source:HGNC Symbol;Acc:HGNC:26387]	32.091	28.0169	36.6527	9.1662
ENSG00000164880	INTS1	integrator complex subunit 1 [Source:HGNC Symbol;Acc:HGNC:24555]	32.0892	16.4094	19.9385	13.5353
ENSG00000012660	ELOVL5	ELOVL fatty acid elongase 5 [Source:HGNC Symbol;Acc:HGNC:21308]	32.087	31.2497	44.2253	45.0903
ENSG00000107745	MICU1	mitochondrial calcium uptake 1 [Source:HGNC Symbol;Acc:HGNC:1530]	32.0859	13.8476	13.8984	13.959
ENSG00000148660	CAMK2G	calcium/calmodulin-dependent protein kinase II gamma [Source:HGNC Symbol;Acc:HGNC:1463]	32.0664	55.1427	37.1607	51.9133
ENSG00000068078	FGFR3	fibroblast growth factor receptor 3 [Source:HGNC Symbol;Acc:HGNC:3690]	32.0511	9.4567	14.6213	8.91669
ENSG00000069345	DNAJA2	DnaJ (Hsp40) homolog, subfamily A, member 2 [Source:HGNC Symbol;Acc:HGNC:14884]	32.0495	67.0257	61.6414	64.1111
ENSG00000086589	RBM22	RNA binding motif protein 22 [Source:HGNC Symbol;Acc:HGNC:25503]	32.0485	12.9552	18.9079	14.9146
ENSG00000117592	PRDX6	peroxiredoxin 6 [Source:HGNC Symbol;Acc:HGNC:16753]	32.0117	59.2713	73.3254	68.6487
ENSG00000028203	VEZT	vezatin, adherens junctions transmembrane protein [Source:HGNC Symbol;Acc:HGNC:18258]	32.0088	9.71095	14.7535	7.90866
ENSG00000144744	UBA3	ubiquitin-like modifier activating enzyme 3 [Source:HGNC Symbol;Acc:HGNC:12470]	32.0026	33.2042	39.1374	38.3206
ENSG00000147027	TMEM47	transmembrane protein 47 [Source:HGNC Symbol;Acc:HGNC:18515]	31.9925	19.6283	17.4293	34.5282
ENSG00000115649	CNPPD1	cyclin Pas1/PHO80 domain containing 1 [Source:HGNC Symbol;Acc:HGNC:25220]	31.9924	11.4736	12.7743	15.7109
ENSG00000138606	SHF	Src homology 2 domain containing F [Source:HGNC Symbol;Acc:HGNC:25116]	31.9859	23.4537	15.7636	15.5884
ENSG00000100028	SNRPD3	small nuclear ribonucleoprotein D3 polypeptide 18kDa [Source:HGNC Symbol;Acc:HGNC:11160]	31.9739	24.6669	17.389	22.1155
ENSG00000138381	ASNSD1	asparagine synthetase domain containing 1 [Source:HGNC Symbol;Acc:HGNC:24910]	31.9722	1.83021	3.23509	4.04534
ENSG00000197043	ANXA6	annexin A6 [Source:HGNC Symbol;Acc:HGNC:544]	31.966	30.9651	42.4622	62.0466
ENSG00000055917	PUM2	pumilio RNA-binding family member 2 [Source:HGNC Symbol;Acc:HGNC:14958]	31.9642	33.9464	42.9077	36.8032
ENSG00000092820	EZR	ezrin [Source:HGNC Symbol;Acc:HGNC:12691]	31.9492	22.3539	39.2862	41.9706
ENSG00000120509	PDZD11	PDZ domain containing 11 [Source:HGNC Symbol;Acc:HGNC:28034]	31.9472	11.272	16.6676	19.019
ENSG00000168259	DNAJC7	DnaJ (Hsp40) homolog, subfamily C, member 7 [Source:HGNC Symbol;Acc:HGNC:12392]	31.9379	72.1771	58.9804	75.3236
ENSG00000007541	PIGQ	phosphatidylinositol glycan anchor biosynthesis, class Q [Source:HGNC Symbol;Acc:HGNC:14135]	31.9328	30.0336	13.6745	27.5786
ENSG00000110400	PVRL1	poliovirus receptor-related 1 (herpesvirus entry mediator C) [Source:HGNC Symbol;Acc:HGNC:9706]	31.9011	17.366	10.4199	13.6636
ENSG00000169957	ZNF768	zinc finger protein 768 [Source:HGNC Symbol;Acc:HGNC:26273]	31.8967	6.02411	11.2807	14.8511
ENSG00000114923	SLC4A3	solute carrier family 4 (anion exchanger), member 3 [Source:HGNC Symbol;Acc:HGNC:11029]	31.8603	28.3033	19.337	14.3146
ENSG00000163634	THOC7	THO complex 7 [Source:HGNC Symbol;Acc:HGNC:29874]	31.8504	43.9283	41.7055	51.8546
ENSG00000206418	RAB12	RAB12, member RAS oncogene family [Source:HGNC Symbol;Acc:HGNC:31332]	31.8403	82.6409	57.9327	44.306
ENSG00000147416	ATP6V1B2	ATPase, H+ transporting, lysosomal 56/58kDa, V1 subunit B2 [Source:HGNC Symbol;Acc:HGNC:854]	31.8306	183.606	84.7068	146.578
ENSG00000163444	TMEM183A	transmembrane protein 183A [Source:HGNC Symbol;Acc:HGNC:20173]	31.829	47.9428	50.0958	31.8936
ENSG00000100379	KCTD17	potassium channel tetramerization domain containing 17 [Source:HGNC Symbol;Acc:HGNC:25705]	31.8258	106.017	46.8672	68.0621
ENSG00000165443	PHYHIPL	phytanoyl-CoA 2-hydroxylase interacting protein-like [Source:HGNC Symbol;Acc:HGNC:29378]	31.8103	46.8013	13.1042	42.9766
ENSG00000132591	ERAL1	Era-like 12S mitochondrial rRNA chaperone 1 [Source:HGNC Symbol;Acc:HGNC:3424]	31.8062	7.53419	9.87313	9.93346
ENSG00000171456	ASXL1	additional sex combs like transcriptional regulator 1 [Source:HGNC Symbol;Acc:HGNC:18318]	31.8034	11.5657	15.9493	13.8216
ENSG00000127511	SIN3B	SIN3 transcription regulator family member B [Source:HGNC Symbol;Acc:HGNC:19354]	31.8006	26.9546	37.5581	27.4689
ENSG00000078140	UBE2K	ubiquitin-conjugating enzyme E2K [Source:HGNC Symbol;Acc:HGNC:4914]	31.7943	34.7938	25.2248	21.6057
ENSG00000143753	DEGS1	delta(4)-desaturase, sphingolipid 1 [Source:HGNC Symbol;Acc:HGNC:13709]	31.7778	27.9257	25.615	53.1825
ENSG00000183020	AP2A2	adaptor-related protein complex 2, alpha 2 subunit [Source:HGNC Symbol;Acc:HGNC:562]	31.774	62.7264	65.7287	56.5686
ENSG00000011451	WIZ	widely interspaced zinc finger motifs [Source:HGNC Symbol;Acc:HGNC:30917]	31.7723	21.6568	6.91002	20.9317
ENSG00000134375	TIMM17A	translocase of inner mitochondrial membrane 17 homolog A (yeast) [Source:HGNC Symbol;Acc:HGNC:17315]	31.7667	7.6907	7.88708	7.79183
ENSG00000103502	CDIPT	CDP-diacylglycerol--inositol 3-phosphatidyltransferase [Source:HGNC Symbol;Acc:HGNC:1769]	31.76	64.144	28.3683	52.3567
ENSG00000176095	IP6K1	inositol hexakisphosphate kinase 1 [Source:HGNC Symbol;Acc:HGNC:18360]	31.7297	46.0667	42.7472	43.6924
ENSG00000181790	ADGRB1	adhesion G protein-coupled receptor B1 [Source:HGNC Symbol;Acc:HGNC:943]	31.7209	46.653	14.789	21.3431
ENSG00000137497	NUMA1	nuclear mitotic apparatus protein 1 [Source:HGNC Symbol;Acc:HGNC:8059]	31.7111	10.4177	28.2385	17.427
ENSG00000167965	MLST8	MTOR associated protein, LST8 homolog [Source:HGNC Symbol;Acc:HGNC:24825]	31.7111	8.87494	8.51802	8.57582
ENSG00000163527	STT3B	STT3B, subunit of the oligosaccharyltransferase complex (catalytic) [Source:HGNC Symbol;Acc:HGNC:30611]	31.6953	34.0736	44.6939	46.3943
ENSG00000173898	SPTBN2	spectrin, beta, non-erythrocytic 2 [Source:HGNC Symbol;Acc:HGNC:11276]	31.6543	88.9067	74.5841	16.0214
ENSG00000198952	SMG5	SMG5 nonsense mediated mRNA decay factor [Source:HGNC Symbol;Acc:HGNC:24644]	31.6458	22.3639	29.0619	25.3028
ENSG00000103035	PSMD7	proteasome (prosome, macropain) 26S subunit, non-ATPase, 7 [Source:HGNC Symbol;Acc:HGNC:9565]	31.6434	71.405	47.5892	77.4614
ENSG00000111639	MRPL51	mitochondrial ribosomal protein L51 [Source:HGNC Symbol;Acc:HGNC:14044]	31.6366	7.40952	11.1241	9.59997
ENSG00000086475	SEPHS1	selenophosphate synthetase 1 [Source:HGNC Symbol;Acc:HGNC:19685]	31.6356	11.5645	17.4239	16.2833
ENSG00000063180	CA11	carbonic anhydrase XI [Source:HGNC Symbol;Acc:HGNC:1370]	31.5809	45.3328	15.7964	21.6286
ENSG00000017260	ATP2C1	ATPase, Ca++ transporting, type 2C, member 1 [Source:HGNC Symbol;Acc:HGNC:13211]	31.5761	34.766	33.4913	25.2908
ENSG00000154975	CA10	carbonic anhydrase X [Source:HGNC Symbol;Acc:HGNC:1369]	31.5747	7.3799	1.10927	27.6658
ENSG00000100387	RBX1	ring-box 1, E3 ubiquitin protein ligase [Source:HGNC Symbol;Acc:HGNC:9928]	31.5475	63.8302	82.1496	66.8647
ENSG00000103769	RAB11A	RAB11A, member RAS oncogene family [Source:HGNC Symbol;Acc:HGNC:9760]	31.5322	101.523	78.6874	74.6899
ENSG00000080822	CLDND1	claudin domain containing 1 [Source:HGNC Symbol;Acc:HGNC:1322]	31.5271	31.8046	14.17	35.6549
ENSG00000039523	FAM65A	family with sequence similarity 65, member A [Source:HGNC Symbol;Acc:HGNC:25836]	31.5248	29.4573	5.63876	20.7155
ENSG00000196072	BLOC1S2	biogenesis of lysosomal organelles complex-1, subunit 2 [Source:HGNC Symbol;Acc:HGNC:20984]	31.5135	43.4396	33.1887	35.6752
ENSG00000134684	YARS	tyrosyl-tRNA synthetase [Source:HGNC Symbol;Acc:HGNC:12840]	31.5083	49.7429	42.7096	43.7712
ENSG00000163104	SMARCAD1	SWI/SNF-related, matrix-associated actin-dependent regulator of chromatin, subfamily a, containing DEAD/H box 1 [Source:HGNC Symbol;Acc:HGNC:18398]	31.4869	10.0611	28.3301	14.9898
ENSG00000117114	ADGRL2	adhesion G protein-coupled receptor L2 [Source:HGNC Symbol;Acc:HGNC:18582]	31.4824	25.9867	34.3944	35.9633
ENSG00000173402	DAG1	dystroglycan 1 (dystrophin-associated glycoprotein 1) [Source:HGNC Symbol;Acc:HGNC:2666]	31.4794	44.1619	29.6376	65.108
ENSG00000143442	POGZ	pogo transposable element with ZNF domain [Source:HGNC Symbol;Acc:HGNC:18801]	31.4728	12.5148	11.7727	16.0134
ENSG00000167680	SEMA6B	sema domain, transmembrane domain (TM), and cytoplasmic domain, (semaphorin) 6B [Source:HGNC Symbol;Acc:HGNC:10739]	31.4457	39.2654	21.7665	10.5544
ENSG00000088833	NSFL1C	NSFL1 (p97) cofactor (p47) [Source:HGNC Symbol;Acc:HGNC:15912]	31.438	60.619	68.2806	66.9001
ENSG00000111328	CDK2AP1	cyclin-dependent kinase 2 associated protein 1 [Source:HGNC Symbol;Acc:HGNC:14002]	31.4267	11.453	39.4097	20.1932
ENSG00000163536	SERPINI1	serpin peptidase inhibitor, clade I (neuroserpin), member 1 [Source:HGNC Symbol;Acc:HGNC:8943]	31.419	41.8876	39.6217	49.0506
ENSG00000183248	PRR36	proline rich 36 [Source:HGNC Symbol;Acc:HGNC:26172]	31.4148	21.5059	2.34905	14.4069
ENSG00000197912	SPG7	spastic paraplegia 7 (pure and complicated autosomal recessive) [Source:HGNC Symbol;Acc:HGNC:11237]	31.4011	21.2031	20.4249	18.3302
ENSG00000095787	WAC	WW domain containing adaptor with coiled-coil [Source:HGNC Symbol;Acc:HGNC:17327]	31.3864	28.1297	28.6603	29.5811
ENSG00000136938	ANP32B	acidic (leucine-rich) nuclear phosphoprotein 32 family, member B [Source:HGNC Symbol;Acc:HGNC:16677]	31.3857	27.8152	13.8486	60.0491
ENSG00000109270	LAMTOR3	late endosomal/lysosomal adaptor, MAPK and MTOR activator 3 [Source:HGNC Symbol;Acc:HGNC:15606]	31.3668	14.4398	13.1138	11.49
ENSG00000005206	SPPL2B	signal peptide peptidase like 2B [Source:HGNC Symbol;Acc:HGNC:30627]	31.3642	32.9349	19.562	19.9088
ENSG00000141576	RNF157	ring finger protein 157 [Source:HGNC Symbol;Acc:HGNC:29402]	31.3602	60.5787	33.0138	48.9136
ENSG00000135164	DMTF1	cyclin D binding myb-like transcription factor 1 [Source:HGNC Symbol;Acc:HGNC:14603]	31.344	14.068	20.1276	13.2302
ENSG00000255794	RMST	rhabdomyosarcoma 2 associated transcript (non-protein coding) [Source:HGNC Symbol;Acc:HGNC:29893]	31.3387	0.347027	0.981512	6.49878
ENSG00000162736	NCSTN	nicastrin [Source:HGNC Symbol;Acc:HGNC:17091]	31.3345	26.6145	20.7374	41.4846
ENSG00000116221	MRPL37	mitochondrial ribosomal protein L37 [Source:HGNC Symbol;Acc:HGNC:14034]	31.2841	17.9479	12.3299	16.7449
ENSG00000162729	IGSF8	immunoglobulin superfamily, member 8 [Source:HGNC Symbol;Acc:HGNC:17813]	31.2629	52.6053	23.245	21.5588
ENSG00000073969	NSF	N-ethylmaleimide-sensitive factor [Source:HGNC Symbol;Acc:HGNC:8016]	31.2568	125.32	37.4581	81.173
ENSG00000166532	RIMKLB	ribosomal modification protein rimK-like family member B [Source:HGNC Symbol;Acc:HGNC:29228]	31.255	39.3419	50.8884	31.0099
ENSG00000140983	RHOT2	ras homolog family member T2 [Source:HGNC Symbol;Acc:HGNC:21169]	31.2343	9.62107	5.38921	7.43928
ENSG00000123570	RAB9B	RAB9B, member RAS oncogene family [Source:HGNC Symbol;Acc:HGNC:14090]	31.2305	11.0915	12.5315	10.7319
ENSG00000118200	CAMSAP2	calmodulin regulated spectrin-associated protein family, member 2 [Source:HGNC Symbol;Acc:HGNC:29188]	31.23	31.7276	54.6767	29.0165
ENSG00000165795	NDRG2	NDRG family member 2 [Source:HGNC Symbol;Acc:HGNC:14460]	31.2139	84.896	64.6391	88.0363
ENSG00000119705	SLIRP	SRA stem-loop interacting RNA binding protein [Source:HGNC Symbol;Acc:HGNC:20495]	31.1975	5.75151	9.36237	6.55794
ENSG00000196338	NLGN3	neuroligin 3 [Source:HGNC Symbol;Acc:HGNC:14289]	31.1879	5.45706	9.2776	4.79743
ENSG00000123143	PKN1	protein kinase N1 [Source:HGNC Symbol;Acc:HGNC:9405]	31.1649	12.7454	15.5847	7.16286
ENSG00000102898	NUTF2	nuclear transport factor 2 [Source:HGNC Symbol;Acc:HGNC:13722]	31.1612	19.6863	20.1914	21.8997
ENSG00000149930	TAOK2	TAO kinase 2 [Source:HGNC Symbol;Acc:HGNC:16835]	31.1456	38.2073	30.3034	37.2647
ENSG00000183684	ALYREF	Aly/REF export factor [Source:HGNC Symbol;Acc:HGNC:19071]	31.1391	10.4084	23.5795	10.3959
ENSG00000168209	DDIT4	DNA-damage-inducible transcript 4 [Source:HGNC Symbol;Acc:HGNC:24944]	31.1154	104.637	35.268	86.9502
ENSG00000164896	FASTK	Fas-activated serine/threonine kinase [Source:HGNC Symbol;Acc:HGNC:24676]	31.0929	18.3282	13.058	16.9288
ENSG00000088930	XRN2	5'-3' exoribonuclease 2 [Source:HGNC Symbol;Acc:HGNC:12836]	31.0834	27.6481	53.6455	30.2334
ENSG00000119655	NPC2	Niemann-Pick disease, type C2 [Source:HGNC Symbol;Acc:HGNC:14537]	31.075	16.391	28.3337	52.8023
ENSG00000155256	ZFYVE27	zinc finger, FYVE domain containing 27 [Source:HGNC Symbol;Acc:HGNC:26559]	31.0737	17.0445	14.5995	12.9273
ENSG00000169689	STRA13	stimulated by retinoic acid 13 [Source:HGNC Symbol;Acc:HGNC:11422]	31.0537	17.3303	12.4946	15.403
ENSG00000124541	RRP36	ribosomal RNA processing 36 [Source:HGNC Symbol;Acc:HGNC:21374]	31.0513	11.7769	13.6345	17.4398
ENSG00000107341	UBE2R2	ubiquitin-conjugating enzyme E2R 2 [Source:HGNC Symbol;Acc:HGNC:19907]	31.0488	33.8643	29.9293	36.0531
ENSG00000174521	TTC9B	tetratricopeptide repeat domain 9B [Source:HGNC Symbol;Acc:HGNC:26395]	31.0351	109.734	41.3765	36.1825
ENSG00000165487	MICU2	mitochondrial calcium uptake 2 [Source:HGNC Symbol;Acc:HGNC:31830]	31.0307	15.6735	23.7918	24.3493
ENSG00000138138	ATAD1	ATPase family, AAA domain containing 1 [Source:HGNC Symbol;Acc:HGNC:25903]	31.0166	52.9592	55.7142	48.497
ENSG00000169180	XPO6	exportin 6 [Source:HGNC Symbol;Acc:HGNC:19733]	31.0154	23.4405	23.1291	26.1296
ENSG00000182054	IDH2	isocitrate dehydrogenase 2 (NADP+), mitochondrial [Source:HGNC Symbol;Acc:HGNC:5383]	31.0137	20.7998	45.5391	55.0583
ENSG00000171824	EXOSC10	exosome component 10 [Source:HGNC Symbol;Acc:HGNC:9138]	31.0102	22.8062	30.5737	26.584
ENSG00000117118	SDHB	succinate dehydrogenase complex, subunit B, iron sulfur (Ip) [Source:HGNC Symbol;Acc:HGNC:10681]	30.9924	92.8716	91.7098	78.6745
ENSG00000118564	FBXL5	F-box and leucine-rich repeat protein 5 [Source:HGNC Symbol;Acc:HGNC:13602]	30.9913	13.5786	20.4355	20.4537
ENSG00000163938	GNL3	guanine nucleotide binding protein-like 3 (nucleolar) [Source:HGNC Symbol;Acc:HGNC:29931]	30.9832	17.6749	27.9275	26.3852
ENSG00000076826	CAMSAP3	calmodulin regulated spectrin-associated protein family, member 3 [Source:HGNC Symbol;Acc:HGNC:29307]	30.9797	24.347	17.9883	16.5965
ENSG00000174917	C19orf70	chromosome 19 open reading frame 70 [Source:HGNC Symbol;Acc:HGNC:33702]	30.9536	42.1803	34.4893	33.3291
ENSG00000106263	EIF3B	eukaryotic translation initiation factor 3, subunit B [Source:HGNC Symbol;Acc:HGNC:3280]	30.9532	53.6995	36.6889	59.4574
ENSG00000049759	NEDD4L	neural precursor cell expressed, developmentally down-regulated 4-like, E3 ubiquitin protein ligase [Source:HGNC Symbol;Acc:HGNC:7728]	30.9419	18.5233	24.498	12.3185
ENSG00000105677	TMEM147	transmembrane protein 147 [Source:HGNC Symbol;Acc:HGNC:30414]	30.9365	73.7672	61.7067	55.8698
ENSG00000101052	IFT52	intraflagellar transport 52 [Source:HGNC Symbol;Acc:HGNC:15901]	30.9079	7.28654	8.86027	18.5743
ENSG00000100280	AP1B1	adaptor-related protein complex 1, beta 1 subunit [Source:HGNC Symbol;Acc:HGNC:554]	30.9058	35.1903	31.5351	47.5931
ENSG00000160094	ZNF362	zinc finger protein 362 [Source:HGNC Symbol;Acc:HGNC:18079]	30.9001	23.9528	11.2696	29.1912
ENSG00000164305	CASP3	caspase 3, apoptosis-related cysteine peptidase [Source:HGNC Symbol;Acc:HGNC:1504]	30.89	84.3418	124.153	67.0016
ENSG00000114650	SCAP	SREBF chaperone [Source:HGNC Symbol;Acc:HGNC:30634]	30.8704	25.3084	21.1766	21.2848
ENSG00000172348	RCAN2	regulator of calcineurin 2 [Source:HGNC Symbol;Acc:HGNC:3041]	30.8491	23.2298	9.71065	49.3226
ENSG00000173210	ABLIM3	actin binding LIM protein family, member 3 [Source:HGNC Symbol;Acc:HGNC:29132]	30.8347	18.4909	12.6775	39.6835
ENSG00000130414	NDUFA10	NADH dehydrogenase (ubiquinone) 1 alpha subcomplex, 10, 42kDa [Source:HGNC Symbol;Acc:HGNC:7684]	30.8243	55.5201	50.1878	51.8758
ENSG00000137547	MRPL15	mitochondrial ribosomal protein L15 [Source:HGNC Symbol;Acc:HGNC:14054]	30.8194	6.65697	8.80162	7.69172
ENSG00000116161	CACYBP	calcyclin binding protein [Source:HGNC Symbol;Acc:HGNC:30423]	30.8067	70.9777	63.8476	59.1322
ENSG00000157020	SEC13	SEC13 homolog, nuclear pore and COPII coating complex component [Source:HGNC Symbol;Acc:HGNC:10697]	30.7914	31.2468	55.0606	56.9978
ENSG00000167193	CRK	v-crk avian sarcoma virus CT10 oncogene homolog [Source:HGNC Symbol;Acc:HGNC:2362]	30.7823	43.3504	45.1732	47.475
ENSG00000177697	CD151	CD151 molecule (Raph blood group) [Source:HGNC Symbol;Acc:HGNC:1630]	30.7603	12.8019	17.0348	32.1529
ENSG00000170581	STAT2	signal transducer and activator of transcription 2, 113kDa [Source:HGNC Symbol;Acc:HGNC:11363]	30.7568	10.4633	5.12188	12.4617
ENSG00000137504	CREBZF	CREB/ATF bZIP transcription factor [Source:HGNC Symbol;Acc:HGNC:24905]	30.7558	16.7277	14.7772	10.6693
ENSG00000110711	AIP	aryl hydrocarbon receptor interacting protein [Source:HGNC Symbol;Acc:HGNC:358]	30.7181	32.7044	21.0182	28.0804
ENSG00000064995	TAF11	TAF11 RNA polymerase II, TATA box binding protein (TBP)-associated factor, 28kDa [Source:HGNC Symbol;Acc:HGNC:11544]	30.706	10.6689	11.0419	11.9008
ENSG00000031003	FAM13B	family with sequence similarity 13, member B [Source:HGNC Symbol;Acc:HGNC:1335]	30.6903	36.167	30.3425	32.6137
[truncated: 9,303 more rows]
