# Supplementary material for: Evidence for evolutionary divergence of activity-dependent gene expression in developing neurons
Source: eLife journal article supplement (doi:10.7554/elife.20337), 2016-10-01
Supplement: supp [file elife-20337-supp-v1.zip › elife_poa_e20337_Figure_3_source_data_1.xlsx]

## Sheet: Fig. 3a, S3
mouse_gene	mouse_gene_name	Fold change in DIV10 WT mouse neurons	Fold change in DIV10 Tc1 neurons (the mouse ortholog)
ENSMUSG00000003545	Fosb	8.47762	9.14931
ENSMUSG00000021250	Fos	6.58055	8.0782
ENSMUSG00000045903	Npas4	6.51435	7.00468
ENSMUSG00000003032	Klf4	6.34264	6.52477
ENSMUSG00000052837	Junb	5.65344	6.32938
ENSMUSG00000042622	Maff	5.5382	5.73155
ENSMUSG00000026628	Atf3	5.51418	6.99821
ENSMUSG00000071341	Egr4	5.35108	5.23292
ENSMUSG00000023034	Nr4a1	5.16769	5.61865
ENSMUSG00000015312	Gadd45b	5.10277	5.31687
ENSMUSG00000026826	Nr4a2	4.86413	5.23826
ENSMUSG00000037868	Egr2	4.85631	5.15612
ENSMUSG00000038418	Egr1	4.69691	5.21878
ENSMUSG00000032487	Ptgs2	4.66785	6.15858
ENSMUSG00000021453	Gadd45g	4.43931	6.16245
ENSMUSG00000027520	Zdbf2	4.27881	3.54863
ENSMUSG00000049516	Spty2d1	4.25123	3.98468
ENSMUSG00000053560	Ier2	4.22706	4.71555
ENSMUSG00000024190	Dusp1	4.19903	3.89668
ENSMUSG00000006720	Zfp184	4.17323	3.77146
ENSMUSG00000032515	Csrnp1	4.13383	4.54257
ENSMUSG00000027115	Kif18a	4.1275	4.31657
ENSMUSG00000063889	Crem	4.10903	3.90652
ENSMUSG00000024014	Pim1	4.10053	4.40178
ENSMUSG00000031880	Rrad	4.09723	3.92567
ENSMUSG00000039942	Ptger4	4.07581	4.58623
ENSMUSG00000021587	Pcsk1	4.02114	3.49008
ENSMUSG00000040435	Ppp1r15a	3.94783	4.33151
ENSMUSG00000048482	Bdnf	3.87867	3.37637
ENSMUSG00000034640	Tiparp	3.8758	3.14437
ENSMUSG00000022602	Arc	3.87087	4.15966
ENSMUSG00000031266	Gla	3.86307	3.57507
ENSMUSG00000029135	Fosl2	3.82772	3.08881
ENSMUSG00000028195	Cyr61	3.82615	4.94213
ENSMUSG00000085492	Trmt61b	3.7408	3.44484
ENSMUSG00000056749	Nfil3	3.67578	3.83341
ENSMUSG00000029313	Aff1	3.67025	4.00343
ENSMUSG00000035021	Baz1a	3.6217	4.28913
ENSMUSG00000008384	Sertad1	3.60972	4.36143
ENSMUSG00000026708	Cenpl	3.57699	3.8433
ENSMUSG00000032265	Fam46a	3.52863	3.02234
ENSMUSG00000052684	Jun	3.51508	3.75808
ENSMUSG00000018541	Cwc25	3.50095	3.75546
ENSMUSG00000017418	Arl5b	3.45343	3.0753
ENSMUSG00000070305	Mpzl3	3.39909	1.92578
ENSMUSG00000031609	Sap30	3.36744	3.46657
ENSMUSG00000028967	Errfi1	3.30112	2.78033
ENSMUSG00000007617	Homer1	3.29701	3.15893
ENSMUSG00000028341	Nr4a3	3.28156	2.55287
ENSMUSG00000028214	Gem	3.25946	4.12081
ENSMUSG00000020423	Btg2	3.23606	3.48282
ENSMUSG00000040084	Bub1b	3.227	3.25541
ENSMUSG00000039114	Nrn1	3.19086	3.07224
ENSMUSG00000077167	Gm24119	3.13982	3.61171
ENSMUSG00000041560	Gltscr2	3.12988	2.87484
ENSMUSG00000024042	Sik1	3.11805	3.06476
ENSMUSG00000026655	Fam107b	3.11199	3.40891
ENSMUSG00000059991	Nptx2	3.08771	2.49533
ENSMUSG00000020893	Per1	3.0533	3.18689
ENSMUSG00000044948	Cfap43	3.01068	4.05023
ENSMUSG00000022864	D16Ertd472e	3.00278	3.06137
ENSMUSG00000000531	Grasp	2.99142	2.20517
ENSMUSG00000053475	Tnfaip6	2.96567	5.82264
ENSMUSG00000048721	Fndc9	2.96477	2.68111
ENSMUSG00000001349	Cnn1	2.95241	1.98802
ENSMUSG00000025912	Mybl1	2.90602	2.63819
ENSMUSG00000034765	Dusp5	2.90525	2.46471
ENSMUSG00000030203	Dusp16	2.84644	3.14059
ENSMUSG00000018648	Dusp14	2.8349	3.02208
ENSMUSG00000049796	Crh	2.81468	3.13812
ENSMUSG00000029062	Cdk11b	2.8134	2.23815
ENSMUSG00000035329	Fbxo33	2.80902	3.27422
ENSMUSG00000040857	Erf	2.79748	2.74345
ENSMUSG00000049649	Gpr3	2.79416	2.68943
ENSMUSG00000056501	Cebpb	2.78717	3.99501
ENSMUSG00000039879	Heca	2.78673	1.77896
ENSMUSG00000006445	Epha2	2.773	2.80775
ENSMUSG00000042599	Kdm7a	2.76409	3.01943
ENSMUSG00000022863	Btg3	2.75948	3.04758
ENSMUSG00000037447	Arid5a	2.71836	2.03496
ENSMUSG00000021760	Gpx8	2.71579	3.3328
ENSMUSG00000021365	Nedd9	2.6884	2.26154
ENSMUSG00000028893	Sesn2	2.68832	1.99288
ENSMUSG00000029333	Rasgef1b	2.6863	2.56528
ENSMUSG00000021963	Sap18	2.677	2.70967
ENSMUSG00000021738	Atxn7	2.66985	1.87742
ENSMUSG00000033364	Usp37	2.6565	2.35939
ENSMUSG00000065590	Mir212	2.65223	2.33411
ENSMUSG00000018143	Mafk	2.6344	2.79828
ENSMUSG00000032902	Slc16a1	2.63203	3.08759
ENSMUSG00000032501	Trib1	2.62665	3.3562
ENSMUSG00000022893	Adamts1	2.62278	2.64014
ENSMUSG00000092035	Peg10	2.61674	1.84672
ENSMUSG00000026646	Suv39h2	2.61353	2.98843
ENSMUSG00000029174	Tbc1d1	2.60705	2.21357
ENSMUSG00000032641	Gpr19	2.60281	2.56018
ENSMUSG00000053846	Lipg	2.59712	1.91702
ENSMUSG00000027544	Nfatc2	2.59139	3.00637
ENSMUSG00000001627	Ifrd1	2.58667	2.66045
ENSMUSG00000023905	Tnfrsf12a	2.57555	2.61851
ENSMUSG00000025366	Esyt1	2.55188	2.18988
ENSMUSG00000051855	Mest	2.54963	2.6483
ENSMUSG00000027293	Ehd4	2.54791	2.22217
ENSMUSG00000030978	Rrm1	2.54725	2.17589
ENSMUSG00000036931	Nfkbid	2.54662	2.74977
ENSMUSG00000010175	Prox1	2.53704	2.46551
ENSMUSG00000036907	C1ql2	2.49065	1.5822
ENSMUSG00000022139	Mbnl2	2.48879	2.41269
ENSMUSG00000036422	Pcdh8	2.4872	2.32134
ENSMUSG00000024521	Pmaip1	2.47669	2.44331
ENSMUSG00000028028	Alpk1	2.47009	0.970301
ENSMUSG00000027806	Tsc22d2	2.46669	2.3768
ENSMUSG00000037112	Sik2	2.46138	1.81211
ENSMUSG00000022176	Rem2	2.45461	2.35993
ENSMUSG00000046062	Ppp1r15b	2.44257	2.13756
ENSMUSG00000026466	Tor1aip1	2.44039	1.99303
ENSMUSG00000050711	Scg2	2.43684	2.27745
ENSMUSG00000028933	Xrcc2	2.43337	1.90434
ENSMUSG00000044786	Zfp36	2.43016	2.67012
ENSMUSG00000034083	Ccdc174	2.42073	2.28646
ENSMUSG00000036432	Siah2	2.42036	2.56226
ENSMUSG00000028587	Orc1	2.40796	2.19995
ENSMUSG00000048416	Mlf1	2.39409	3.95329
ENSMUSG00000019817	Plagl1	2.39211	1.87174
ENSMUSG00000065537	Mir132	2.39144	2.61925
ENSMUSG00000066278	Vps37b	2.38867	2.11458
ENSMUSG00000005148	Klf5	2.38477	2.3906
ENSMUSG00000063760	Rnf217	2.38417	2.20446
ENSMUSG00000031245	Hmgn5	2.3766	2.37108
ENSMUSG00000049493	Pls1	2.3658	1.77506
ENSMUSG00000035356	Nfkbiz	2.35685	3.01519
ENSMUSG00000042515	Mum1l1	2.35023	2.23311
ENSMUSG00000038894	Irs2	2.34733	2.18643
ENSMUSG00000051246	Msantd1	2.33204	2.63008
ENSMUSG00000049791	Fzd4	2.32515	2.25439
ENSMUSG00000051495	Irf2bp2	2.32396	2.23083
ENSMUSG00000030849	Fgfr2	2.32042	2.02606
ENSMUSG00000069114	Zbtb10	2.31738	1.90082
ENSMUSG00000037580	Gch1	2.3141	1.78393
ENSMUSG00000024256	Adcyap1	2.31338	2.1322
ENSMUSG00000032220	Myo1e	2.3095	2.6208
ENSMUSG00000025981	Coq10b	2.30322	2.04028
ENSMUSG00000062867	Impdh2	2.29826	2.00194
ENSMUSG00000003153	Slc2a3	2.29695	2.09121
ENSMUSG00000049892	Rasd1	2.26484	2.98936
ENSMUSG00000047904	Sstr2	2.26482	2.00757
ENSMUSG00000064325	Hhip	2.25905	2.2689
ENSMUSG00000027381	Bcl2l11	2.25144	1.62164
ENSMUSG00000028016	Ints12	2.24785	1.57893
ENSMUSG00000040511	Pvr	2.24677	1.72889
ENSMUSG00000042608	Stk40	2.24241	1.94845
ENSMUSG00000024232	Bambi	2.23493	2.35195
ENSMUSG00000042029	Ncapg2	2.23105	1.79135
ENSMUSG00000007589	Tinf2	2.22338	1.21788
ENSMUSG00000024261	Syt4	2.2208	2.13714
ENSMUSG00000031715	Smarca5	2.21988	1.97468
ENSMUSG00000001542	Ell2	2.21983	2.40894
ENSMUSG00000047604	Frat2	2.21729	2.86561
ENSMUSG00000031530	Dusp4	2.21712	1.95322
ENSMUSG00000056972	Magel2	2.21302	1.60755
ENSMUSG00000022601	Zbtb11	2.20467	2.11215
ENSMUSG00000058881	Zfp516	2.1953	1.55731
ENSMUSG00000035851	Ythdc1	2.19313	2.11358
ENSMUSG00000046727	Cystm1	2.192	2.39106
ENSMUSG00000033849	B3galt2	2.19135	2.58111
ENSMUSG00000021647	Cartpt	2.18785	2.62325
ENSMUSG00000033863	Klf9	2.17978	2.58011
ENSMUSG00000031668	Eif2ak3	2.17945	1.81582
ENSMUSG00000001964	Emd	2.17434	1.63854
ENSMUSG00000023919	Cenpq	2.17328	2.06159
ENSMUSG00000076335	Mir670	2.15905	2.95835
ENSMUSG00000026360	Rgs2	2.15172	2.2908
ENSMUSG00000051278	Zgrf1	2.14027	1.29445
ENSMUSG00000042406	Atf4	2.13974	2.08211
ENSMUSG00000071757	Zhx2	2.13959	2.33345
ENSMUSG00000033909	Usp36	2.13301	1.73537
ENSMUSG00000028035	Dnajb4	2.13262	2.20265
ENSMUSG00000021690	Jmy	2.11305	1.99314
ENSMUSG00000030790	Adm	2.11234	2.04983
ENSMUSG00000035545	Leng8	2.10138	1.14435
ENSMUSG00000071076	Jund	2.09898	2.11433
ENSMUSG00000078671	Chd2	2.09785	1.74197
ENSMUSG00000027832	Ptx3	2.09739	2.11743
ENSMUSG00000048109	Rbm15	2.09452	1.3465
ENSMUSG00000055320	Tead1	2.08136	2.13686
ENSMUSG00000041548	Hspb8	2.07149	2.38585
ENSMUSG00000019960	Dusp6	2.05111	2.54858
ENSMUSG00000024843	Chka	2.0499	1.99156
ENSMUSG00000025337	Sbds	2.04581	1.74198
ENSMUSG00000030699	Tbx6	2.02655	1.62641
ENSMUSG00000036478	Btg1	2.02191	2.54351
ENSMUSG00000030403	Vasp	2.02031	1.35925
ENSMUSG00000030022	Adamts9	2.01802	1.37474
ENSMUSG00000055200	Sertad3	2.01776	2.57099
ENSMUSG00000020134	Peli1	2.01417	2.21776
ENSMUSG00000064141	Zfp69	2.01058	1.45164
ENSMUSG00000004885	Crabp2	1.99999	2.5317
ENSMUSG00000068742	Cry2	1.99616	1.60494
ENSMUSG00000045414	1190002N15Rik	1.99469	2.31264
ENSMUSG00000026064	Ptp4a1	1.98933	1.65298
ENSMUSG00000046865	Fbl	1.97832	2.05681
ENSMUSG00000041846	Smek1	1.97698	1.34016
ENSMUSG00000017499	Cdc6	1.97073	3.51289
ENSMUSG00000003541	Ier3	1.95492	1.89891
ENSMUSG00000015605	Srf	1.95129	2.04253
ENSMUSG00000030847	Bag3	1.95085	1.84765
ENSMUSG00000029534	St7	1.94929	1.73222
ENSMUSG00000021815	Mss51	1.94823	1.50054
ENSMUSG00000027342	Pcna	1.94699	1.72482
ENSMUSG00000074364	Ehd2	1.94639	1.16191
ENSMUSG00000071317	Bves	1.94586	1.51795
ENSMUSG00000006736	Tspan31	1.94548	1.14826
ENSMUSG00000055866	Per2	1.93751	1.99279
ENSMUSG00000020190	Mknk2	1.93378	1.59094
ENSMUSG00000079659	Tmem243	1.93167	2.29479
ENSMUSG00000027510	Rbm38	1.92557	1.7023
ENSMUSG00000091971	Hspa1a	1.90266	1.5692
ENSMUSG00000010660	Plcd1	1.89992	1.73782
ENSMUSG00000032113	Chek1	1.89413	1.60082
ENSMUSG00000048285	Frmd6	1.8928	2.06208
ENSMUSG00000048100	Taf13	1.89021	1.90315
ENSMUSG00000032135	Mcam	1.88698	0.896352
ENSMUSG00000067586	S1pr3	1.88398	1.43628
ENSMUSG00000040363	Bcor	1.88385	1.0188
ENSMUSG00000034101	Ctnnd1	1.88268	1.95054
ENSMUSG00000020303	Stc2	1.87798	1.84267
ENSMUSG00000037416	Dmxl1	1.87456	1.36809
ENSMUSG00000028063	Lmna	1.87218	2.01589
ENSMUSG00000035840	Lysmd3	1.86589	1.64942
ENSMUSG00000033730	Egr3	1.86016	1.63649
ENSMUSG00000063550	Nup98	1.85781	1.4654
ENSMUSG00000055430	Nap1l5	1.85483	1.87093
ENSMUSG00000026094	Stk17b	1.85255	2.32417
ENSMUSG00000005413	Hmox1	1.84662	1.25915
ENSMUSG00000021959	Lats2	1.84587	1.57016
ENSMUSG00000019966	Kitl	1.8433	1.57014
ENSMUSG00000051379	Flrt3	1.83997	1.51029
ENSMUSG00000019857	Asf1a	1.83842	1.50171
ENSMUSG00000039384	Dusp10	1.82861	2.61226
ENSMUSG00000003031	Cdkn1b	1.82543	1.78713
ENSMUSG00000039473	Ubn1	1.82454	1.46834
ENSMUSG00000030878	Cdr2	1.8211	1.89451
ENSMUSG00000030208	Emp1	1.81775	2.7128
ENSMUSG00000042742	B630005N14Rik	1.8154	1.49597
ENSMUSG00000018736	Ndel1	1.81346	1.64287
ENSMUSG00000026475	Rgs16	1.81169	1.41594
ENSMUSG00000036390	Gadd45a	1.81035	2.28602
ENSMUSG00000024383	Map3k2	1.80199	1.4802
ENSMUSG00000029528	Pxn	1.79701	1.16933
ENSMUSG00000029394	Cdk2ap1	1.79205	2.42211
ENSMUSG00000071722	Spin4	1.78654	2.09502
ENSMUSG00000034485	Uaca	1.78163	2.04782
ENSMUSG00000019577	Pdk4	1.78132	1.46162
ENSMUSG00000026728	Vim	1.78114	1.84572
ENSMUSG00000026586	Prrx1	1.77938	1.09003
ENSMUSG00000041731	Pgm5	1.77263	0.122851
ENSMUSG00000028172	Tacr3	1.76983	1.97935
ENSMUSG00000005699	Pard6a	1.76345	1.77182
ENSMUSG00000020387	Jade2	1.76338	1.63269
ENSMUSG00000044067	Gpr22	1.75705	0.996649
ENSMUSG00000040287	Stac3	1.75638	2.33341
ENSMUSG00000039910	Cited2	1.7495	1.95451
ENSMUSG00000021974	Fgf9	1.7489	2.01537
ENSMUSG00000033102	Cdc14b	1.74732	1.23167
ENSMUSG00000048216	Gpr85	1.74675	1.55771
ENSMUSG00000029817	Tra2a	1.74001	2.2049
ENSMUSG00000029162	Khk	1.73899	1.66007
ENSMUSG00000087006	Gm13889	1.73725	2.31563
ENSMUSG00000025529	Zfp711	1.73199	1.37577
ENSMUSG00000025025	Mxi1	1.72856	1.7853
ENSMUSG00000052253	Zfp622	1.72676	1.84376
ENSMUSG00000028718	Stil	1.726	3.6331
ENSMUSG00000024912	Fosl1	1.72579	1.80399
ENSMUSG00000038000	Acd	1.72484	1.32943
ENSMUSG00000041408	Wapal	1.72303	1.39839
ENSMUSG00000031799	Tpm4	1.72207	1.26623
ENSMUSG00000048546	Tob2	1.72172	2.38826
ENSMUSG00000014905	Dnajb9	1.7194	1.91804
ENSMUSG00000035310	Lin54	1.71258	0.923081
ENSMUSG00000024206	Rfx2	1.71186	2.49931
ENSMUSG00000034936	Arl4d	1.71106	1.3256
ENSMUSG00000037428	Vgf	1.70533	1.50705
ENSMUSG00000031168	Ebp	1.69785	1.46938
ENSMUSG00000030124	Lag3	1.69708	1.89354
ENSMUSG00000019487	Trip10	1.69625	1.17576
ENSMUSG00000040043	Rbms2	1.69566	1.10509
ENSMUSG00000037594	BC022687	1.69536	1.49962
ENSMUSG00000038705	Gmeb2	1.69528	1.34224
ENSMUSG00000040565	Btaf1	1.69329	1.39171
ENSMUSG00000050212	Eva1b	1.69057	2.75256
ENSMUSG00000042507	Elmsan1	1.68881	1.41211
ENSMUSG00000025880	Smad7	1.6875	1.46011
ENSMUSG00000033762	Recql4	1.68053	1.2136
ENSMUSG00000029687	Ezh2	1.67772	1.62585
ENSMUSG00000027829	Ccnl1	1.6756	1.96177
ENSMUSG00000025234	Arih1	1.67511	1.41504
ENSMUSG00000032374	Plod2	1.67413	1.29819
ENSMUSG00000051159	Cited1	1.66058	2.19625
ENSMUSG00000016520	Lnx2	1.65746	0.747631
ENSMUSG00000005087	Cd44	1.65665	2.08339
ENSMUSG00000031381	Piga	1.65541	1.51253
ENSMUSG00000041695	Kcnj2	1.65261	2.21115
ENSMUSG00000053007	Creb5	1.64909	1.47526
ENSMUSG00000022178	Ajuba	1.64818	1.42157
ENSMUSG00000038594	Cep85l	1.64799	0.463354
ENSMUSG00000002413	Braf	1.64578	1.35931
ENSMUSG00000029061	Mmp23	1.64578	2.39089
ENSMUSG00000025915	Sgk3	1.64553	1.46453
ENSMUSG00000042396	Rbm7	1.64463	1.57392
ENSMUSG00000010067	Rassf1	1.64116	1.2681
ENSMUSG00000036376	Abt1	1.64002	1.39941
ENSMUSG00000037876	Jmjd1c	1.63893	1.54732
ENSMUSG00000044461	Shisa2	1.63536	2.01371
ENSMUSG00000026049	Tex30	1.63464	1.56135
ENSMUSG00000040128	Pnrc1	1.63323	2.35348
ENSMUSG00000051236	Msrb3	1.63024	0.853631
ENSMUSG00000065715	Snord7	1.62942	1.0228
ENSMUSG00000029552	Tes	1.62925	1.56445
ENSMUSG00000073434	Wdr90	1.62807	1.5114
ENSMUSG00000032611	1700102P08Rik	1.62795	1.15146
ENSMUSG00000050567	Maml1	1.62745	1.084
ENSMUSG00000037474	Dtl	1.626	1.77789
ENSMUSG00000022945	Chaf1b	1.62376	1.78683
ENSMUSG00000038518	Jarid2	1.61675	1.66765
ENSMUSG00000016239	Lonrf3	1.6115	2.20898
ENSMUSG00000032010	Usp2	1.60916	1.64302
ENSMUSG00000034165	Ccnd3	1.60877	1.2909
ENSMUSG00000039191	Rbpj	1.60766	1.28474
ENSMUSG00000020656	Grhl1	1.60709	0.99913
ENSMUSG00000027803	Wwtr1	1.60658	1.41515
ENSMUSG00000037533	Rapgef6	1.60647	1.35226
ENSMUSG00000044122	Proca1	1.60482	1.5552
ENSMUSG00000028300	3110043O21Rik	1.60157	1.55962
ENSMUSG00000055799	Tcf7l1	1.59992	0.94879
ENSMUSG00000028945	Rheb	1.59542	1.20957
ENSMUSG00000036646	Man1b1	1.59349	0.772738
ENSMUSG00000016624	Phf21b	1.59228	1.44151
ENSMUSG00000053470	Kdm3a	1.58727	1.50745
ENSMUSG00000028249	Sdcbp	1.5831	1.94819
ENSMUSG00000026615	Eprs	1.57997	1.18179
ENSMUSG00000041741	Pde3a	1.57851	0.719245
ENSMUSG00000063406	Tmed5	1.5774	1.25794
ENSMUSG00000033713	Foxn3	1.57535	1.43848
ENSMUSG00000001467	Cyp51	1.57215	1.28422
ENSMUSG00000059834	Sclt1	1.56948	1.74678
ENSMUSG00000026987	Baz2b	1.56875	0.776046
ENSMUSG00000031770	Herpud1	1.56627	1.51314
ENSMUSG00000035621	Midn	1.56531	1.25789
ENSMUSG00000050335	Lgals3	1.56492	2.35077
ENSMUSG00000021877	Arf4	1.56398	1.42352
ENSMUSG00000036315	Znrd1	1.56299	1.09588
ENSMUSG00000025225	Nfkb2	1.56245	1.70875
ENSMUSG00000071862	Lrrtm2	1.5606	1.04896
ENSMUSG00000068699	Flnc	1.55927	1.25961
ENSMUSG00000038250	Usp38	1.55854	0.982817
ENSMUSG00000021701	Plk2	1.55708	1.70372
ENSMUSG00000036693	Nop14	1.55685	1.00168
ENSMUSG00000041308	Sntb2	1.55534	1.18897
ENSMUSG00000090877	Hspa1b	1.55517	2.98473
ENSMUSG00000035397	Klf16	1.54872	1.3708
ENSMUSG00000056895	Hist3h2ba	1.54855	1.35839
ENSMUSG00000024560	Cxxc1	1.54855	1.51892
ENSMUSG00000028383	Hsdl2	1.54756	1.23211
ENSMUSG00000040152	Thbs1	1.54611	1.21859
ENSMUSG00000037730	Mynn	1.54292	1.50322
ENSMUSG00000035873	Pawr	1.54251	1.61833
ENSMUSG00000057440	Mpp7	1.54107	0.687359
ENSMUSG00000033016	Nfatc1	1.53925	2.0308
ENSMUSG00000029334	Prkg2	1.53922	-0.0233036
ENSMUSG00000032913	Lrig2	1.53823	1.19325
ENSMUSG00000049800	Sertad2	1.5333	1.46945
ENSMUSG00000035109	Shc4	1.52646	1.04108
ENSMUSG00000039552	Rsph4a	1.52514	3.03308
ENSMUSG00000005667	Mthfd2	1.52417	1.08682
ENSMUSG00000026994	Galnt3	1.5233	1.36109
ENSMUSG00000027358	Bmp2	1.52131	1.80043
ENSMUSG00000006134	Crkl	1.52063	1.03089
ENSMUSG00000037379	Spon2	1.51891	1.24876
ENSMUSG00000024423	Impact	1.51594	1.13293
ENSMUSG00000019970	Sgk1	1.51591	1.56023
ENSMUSG00000035232	Pdk3	1.51523	1.3873
ENSMUSG00000026510	Trp53bp2	1.51486	0.803247
ENSMUSG00000022055	Nefl	1.5101	1.44507
ENSMUSG00000037857	Nufip2	1.50947	1.12692
ENSMUSG00000027257	Pacsin3	1.50907	1.62008
ENSMUSG00000043279	Trim56	1.50819	0.73599
ENSMUSG00000026479	Lamc2	1.50746	0.844016
ENSMUSG00000026864	Hspa5	1.50434	1.52096
ENSMUSG00000094870	Zfp131	1.50403	1.61019
ENSMUSG00000046962	Zbtb21	1.50383	1.30533
ENSMUSG00000034832	Tet3	1.50371	0.907451
ENSMUSG00000003382	Etv3	1.50325	1.16219
ENSMUSG00000024805	Pcgf5	1.50063	1.18789
ENSMUSG00000031781	Ciapin1	1.4994	0.9216
ENSMUSG00000074170	Plekhf1	1.49865	1.48915
ENSMUSG00000089774	Slc5a3	1.49537	1.6872
ENSMUSG00000027313	Chac1	1.49382	0.0361897
ENSMUSG00000022114	Spry2	1.49307	2.05648
ENSMUSG00000027739	Rab33b	1.49027	1.31413
ENSMUSG00000038180	Spag4	1.48987	0.966672
ENSMUSG00000024816	Frmd8	1.48829	0.683986
ENSMUSG00000037993	Dhx38	1.48736	1.00456
ENSMUSG00000039395	Mreg	1.48715	1.88991
ENSMUSG00000025578	Cbx8	1.48564	1.01532
ENSMUSG00000027660	Skil	1.48188	1.31803
ENSMUSG00000006498	Ptbp1	1.47824	1.25047
ENSMUSG00000032656	36219	1.47697	1.2102
ENSMUSG00000058056	Palld	1.47613	0.910485
ENSMUSG00000032349	Elovl5	1.47613	1.53756
ENSMUSG00000028645	Slc2a1	1.47174	2.24492
ENSMUSG00000033792	Atp7a	1.46984	0.576579
ENSMUSG00000024486	Hbegf	1.46807	1.55313
ENSMUSG00000030533	Unc45a	1.46774	1.57029
ENSMUSG00000039221	Rpl22l1	1.46252	2.37588
ENSMUSG00000030423	Pop4	1.461	1.52819
ENSMUSG00000025283	Sat1	1.46055	1.3811
ENSMUSG00000070047	Fat1	1.4604	0.931994
ENSMUSG00000020994	Pnn	1.45739	1.0572
ENSMUSG00000038205	Prkab2	1.45695	1.21588
ENSMUSG00000030602	Pak4	1.4569	0.985482
ENSMUSG00000029641	Rasl11a	1.4555	1.30155
ENSMUSG00000062991	Nrg1	1.4551	1.52042
ENSMUSG00000010110	Stx5a	1.4481	0.84768
ENSMUSG00000055782	Abcd2	1.44648	1.2154
ENSMUSG00000030145	Zfp248	1.44555	0.791719
ENSMUSG00000032356	Rasgrf1	1.44515	1.36736
ENSMUSG00000021823	Vcl	1.44493	1.43287
ENSMUSG00000018102	Hist1h2bc	1.44419	1.19646
ENSMUSG00000056708	Ier5	1.44252	1.08371
ENSMUSG00000060519	Tor3a	1.44229	0.993029
ENSMUSG00000030766	Arhgap17	1.43857	1.61724
ENSMUSG00000048787	Dcun1d3	1.43642	0.876858
ENSMUSG00000045679	Pqlc3	1.43626	0.759317
ENSMUSG00000031529	Tnks	1.43028	1.1378
ENSMUSG00000021112	Mpp5	1.42966	1.17601
ENSMUSG00000015176	Nolc1	1.42792	1.01768
ENSMUSG00000003119	Cdk12	1.41921	0.700245
ENSMUSG00000048706	Lurap1l	1.41627	1.94602
ENSMUSG00000034163	Zfc3h1	1.41491	0.927108
ENSMUSG00000065147	Snora31	1.41488	2.62507
ENSMUSG00000019890	Nts	1.41158	1.91916
ENSMUSG00000023348	Trip6	1.40797	0.799728
ENSMUSG00000064339	mt-Rnr2	1.40627	1.82052
ENSMUSG00000037369	Kdm6a	1.40287	1.05007
ENSMUSG00000054409	Tmem74	1.40206	0.780472
ENSMUSG00000019952	Poc1b	1.40185	1.36356
ENSMUSG00000039568	Ubald1	1.40109	1.22849
ENSMUSG00000029249	Rest	1.39987	1.52048
ENSMUSG00000072568	Fam84b	1.39842	1.7391
ENSMUSG00000045613	Chrm2	1.39805	1.28684
ENSMUSG00000030924	2610020H08Rik	1.39552	1.70911
ENSMUSG00000039985	Fam60a	1.39429	1.87937
ENSMUSG00000051451	Crebzf	1.39188	1.81389
ENSMUSG00000026436	Elk4	1.39066	1.49962
ENSMUSG00000057367	Birc2	1.38738	0.995682
ENSMUSG00000020186	Csrp2	1.38479	1.32474
ENSMUSG00000053641	Dennd4a	1.38319	1.10257
ENSMUSG00000026740	Dnajc1	1.38252	0.461425
ENSMUSG00000021411	Pxdc1	1.38027	1.16013
ENSMUSG00000090386	Mir99ahg	1.37307	1.49285
ENSMUSG00000044864	Ankrd50	1.37208	0.942459
ENSMUSG00000104960	Snhg8	1.36984	2.05463
ENSMUSG00000030322	Mbd4	1.36952	1.14256
ENSMUSG00000041189	Chrnb1	1.36949	0.648401
ENSMUSG00000003226	Ranbp2	1.36901	1.12817
ENSMUSG00000036019	Tmtc2	1.36881	1.28474
ENSMUSG00000035274	Tpbg	1.36848	1.92189
ENSMUSG00000037519	Ppfia1	1.36784	1.4086
ENSMUSG00000022297	Fzd6	1.36756	0.50052
ENSMUSG00000032525	Nktr	1.36689	0.996624
ENSMUSG00000056306	Sertm1	1.36512	0.920371
ENSMUSG00000043929	Klhl15	1.3635	1.08899
ENSMUSG00000031438	Rnf128	1.36296	1.5707
ENSMUSG00000056211	R3hdm1	1.36177	0.965071
ENSMUSG00000031387	Renbp	1.35742	1.41075
ENSMUSG00000049191	Rgag4	1.3538	0.97741
ENSMUSG00000021113	Snapc1	1.35337	1.31257
ENSMUSG00000002732	Fkbp7	1.35334	1.35594
ENSMUSG00000024240	Epc1	1.35291	1.01897
ENSMUSG00000042712	Wbp5	1.34901	1.68116
ENSMUSG00000035164	Zc3h12c	1.34819	1.58327
ENSMUSG00000034006	Pqlc1	1.34798	1.22202
ENSMUSG00000031157	Pqbp1	1.34762	1.41301
ENSMUSG00000048756	Foxo3	1.34752	0.938338
ENSMUSG00000051579	Tceal8	1.34341	1.63168
ENSMUSG00000021319	Sfrp4	1.34164	1.05159
ENSMUSG00000026956	Uap1l1	1.34031	0.963889
ENSMUSG00000032018	Sc5d	1.3391	1.19715
ENSMUSG00000050271	D8Ertd82e	1.33635	0.223012
ENSMUSG00000043415	Otud1	1.32947	1.94599
ENSMUSG00000050052	Tdrp	1.32738	1.10634
ENSMUSG00000034135	Sik3	1.32452	0.998365
ENSMUSG00000000278	Scpep1	1.32155	0.538335
ENSMUSG00000039159	Ube2h	1.32143	1.15088
ENSMUSG00000031939	Taf1d	1.32107	1.01579
ENSMUSG00000028111	Ctsk	1.31992	1.54264
ENSMUSG00000022269	39141	1.31908	1.21644
ENSMUSG00000008855	Hdac5	1.31841	1.25609
ENSMUSG00000023067	Cdkn1a	1.31601	1.15709
ENSMUSG00000020038	Cry1	1.31309	1.07181
ENSMUSG00000030619	Eed	1.31266	0.896503
ENSMUSG00000018821	Avpi1	1.31166	1.12968
ENSMUSG00000027195	Hsd17b12	1.31148	0.880374
ENSMUSG00000049929	Lpar4	1.30881	1.05167
ENSMUSG00000025278	Flnb	1.30809	0.841979
ENSMUSG00000025340	Rabgef1	1.30766	1.06411
ENSMUSG00000049630	C1ql3	1.30437	0.866025
ENSMUSG00000022905	Kpna1	1.30397	1.33157
ENSMUSG00000024949	Sf1	1.30214	1.16404
ENSMUSG00000041135	Ripk2	1.29898	0.804421
ENSMUSG00000035725	Prkx	1.29797	1.25436
ENSMUSG00000022322	Shcbp1	1.2953	0.70427
ENSMUSG00000056429	Tgoln1	1.29469	0.648784
ENSMUSG00000089239	Gm22200	1.29452	2.98637
ENSMUSG00000021258	Ccnk	1.29391	1.16544
ENSMUSG00000061186	Sfmbt2	1.29337	1.08237
ENSMUSG00000032350	Gclc	1.29304	0.92
ENSMUSG00000020728	Cep112	1.29193	1.30582
ENSMUSG00000038187	Btbd10	1.289	1.04094
ENSMUSG00000027018	Hat1	1.28533	0.858136
ENSMUSG00000026384	Ptpn4	1.28343	0.521876
ENSMUSG00000033031	C330027C09Rik	1.27758	1.42858
ENSMUSG00000020572	Nampt	1.27303	1.1727
ENSMUSG00000033323	Ctdp1	1.2671	1.41886
ENSMUSG00000034551	Hdx	1.26648	1.66039
ENSMUSG00000034248	Slc25a37	1.26595	0.915638
ENSMUSG00000078676	Casc3	1.26575	0.571972
ENSMUSG00000002297	Dbf4	1.26563	1.14396
ENSMUSG00000026961	Lrrc26	1.26547	0.475722
ENSMUSG00000024778	Fas	1.26533	1.18753
ENSMUSG00000064427	Gm22748	1.26439	2.12201
ENSMUSG00000068732	Tmem167b	1.26324	1.40724
ENSMUSG00000028986	Klhl7	1.2621	1.22582
ENSMUSG00000047259	Mc4r	1.26142	1.4532
ENSMUSG00000035095	Fam167a	1.26131	0.794928
ENSMUSG00000037892	Pcdh18	1.26031	0.875799
ENSMUSG00000010830	Kdelr3	1.26026	1.1574
ENSMUSG00000021591	Glrx	1.25996	1.13146
ENSMUSG00000051703	Tmem198	1.25982	0.821394
ENSMUSG00000025173	Wdr45b	1.25962	0.858342
ENSMUSG00000042650	Alkbh5	1.25774	1.01556
ENSMUSG00000022911	Arl13b	1.25693	1.36451
ENSMUSG00000020525	Ppm1d	1.25682	0.964327
ENSMUSG00000011179	Odc1	1.25651	1.15015
ENSMUSG00000038668	Lpar1	1.25571	1.44565
ENSMUSG00000036822	Topors	1.25476	1.15764
ENSMUSG00000019947	Arid5b	1.25462	0.978497
ENSMUSG00000022999	Lmbr1l	1.25461	1.16121
ENSMUSG00000029314	Agpat9	1.25164	0.858395
ENSMUSG00000032648	Pygm	1.2496	1.82485
ENSMUSG00000020024	Cep83	1.24855	0.992267
ENSMUSG00000030555	Ttc23	1.24851	1.2831
ENSMUSG00000028698	Pik3r3	1.2479	0.728833
ENSMUSG00000035441	Myo1d	1.24526	0.977879
ENSMUSG00000006456	Rbm14	1.2439	0.912132
ENSMUSG00000045573	Penk	1.2433	1.60275
ENSMUSG00000055044	Pdlim1	1.24128	1.43851
ENSMUSG00000021125	Arg2	1.2377	0.684742
ENSMUSG00000028126	Pip5k1a	1.23531	1.12414
ENSMUSG00000061904	Slc25a3	1.23369	1.48931
ENSMUSG00000059401	Mamld1	1.22966	1.07835
ENSMUSG00000031431	Tsc22d3	1.22685	1.30552
ENSMUSG00000050565	Tor1aip2	1.22629	0.80415
ENSMUSG00000034059	Ypel4	1.22512	1.02334
ENSMUSG00000072969	Armcx5	1.22471	1.5184
ENSMUSG00000032231	Anxa2	1.22373	1.49937
ENSMUSG00000035456	Prdm8	1.22185	1.75371
ENSMUSG00000020185	E2f7	1.21793	1.48006
ENSMUSG00000028163	Nfkb1	1.21688	1.13503
ENSMUSG00000037621	Atoh8	1.21637	1.3149
ENSMUSG00000038612	Mcl1	1.21558	1.37815
ENSMUSG00000039989	Cbx4	1.21519	0.994109
ENSMUSG00000054717	Hmgb2	1.21377	2.53333
ENSMUSG00000038774	Ascc3	1.21324	0.953682
ENSMUSG00000057069	Ero1lb	1.2107	0.575285
ENSMUSG00000031327	Chic1	1.2084	1.23299
ENSMUSG00000040666	Sh3bgr	1.20779	1.24604
ENSMUSG00000005533	Igf1r	1.20775	0.881281
ENSMUSG00000051726	Kcnf1	1.20708	1.14013
ENSMUSG00000000567	Sox9	1.20675	2.56614
ENSMUSG00000038538	Ubn2	1.20127	0.973395
ENSMUSG00000021127	Zfp36l1	1.20026	0.827319
ENSMUSG00000025049	Taf5	1.19981	0.580986
ENSMUSG00000031226	Pbdc1	1.19909	1.2913
ENSMUSG00000022462	Slc38a2	1.19907	1.45072
ENSMUSG00000056216	Cebpg	1.19801	1.25991
ENSMUSG00000020393	Kremen1	1.1963	0.563071
ENSMUSG00000024427	Spry4	1.19265	0.907964
ENSMUSG00000070526	Peg12	1.18885	1.78039
ENSMUSG00000022858	Tra2b	1.18877	1.39172
ENSMUSG00000039652	Cpeb3	1.18869	0.813172
ENSMUSG00000024002	Brd4	1.18843	0.301845
ENSMUSG00000037815	Ctnna1	1.18602	0.951744
ENSMUSG00000051396	Hspa14	1.18589	1.14417
ENSMUSG00000035493	Tgfbi	1.18061	0.86952
ENSMUSG00000061589	Dot1l	1.1795	0.883381
ENSMUSG00000022360	Atad2	1.17919	1.4402
ENSMUSG00000055128	Cgrrf1	1.17916	0.961933
ENSMUSG00000026519	Tmem63a	1.17866	1.21097
ENSMUSG00000036022	Fam122b	1.17727	0.885346
ENSMUSG00000001763	Tspan33	1.17321	1.87917
ENSMUSG00000020922	Lsm12	1.17242	1.10071
ENSMUSG00000024789	Jak2	1.17168	0.649131
ENSMUSG00000004317	Clcn5	1.17142	0.636138
ENSMUSG00000040297	Suco	1.16956	0.777252
ENSMUSG00000035172	Plekhh3	1.16641	0.783083
ENSMUSG00000029338	Antxr2	1.16637	1.20984
ENSMUSG00000028609	Magoh	1.16492	1.29575
ENSMUSG00000023186	Vwa5a	1.16371	0.844948
ENSMUSG00000031565	Fgfr1	1.16329	1.01341
ENSMUSG00000032633	Flcn	1.1621	0.220476
ENSMUSG00000031314	Taf1	1.16082	0.850324
ENSMUSG00000042225	Ammecr1	1.15931	0.483347
ENSMUSG00000038174	Fam126b	1.15862	0.625008
ENSMUSG00000034471	Caskin2	1.15803	0.260346
ENSMUSG00000026421	Csrp1	1.15736	1.66432
ENSMUSG00000031604	Msmo1	1.15691	0.960156
ENSMUSG00000063632	Sox11	1.15605	0.77911
ENSMUSG00000074794	Arrdc3	1.15601	0.652474
ENSMUSG00000053931	Cnn3	1.15553	1.0663
ENSMUSG00000025757	Hspa4l	1.15541	0.710883
ENSMUSG00000032058	Ppp2r1b	1.15351	0.43401
ENSMUSG00000047514	Tspyl1	1.15247	1.05104
ENSMUSG00000047777	Phf13	1.15177	1.00339
ENSMUSG00000000555	Itga5	1.15054	1.66147
ENSMUSG00000028437	Ubap1	1.1504	0.503629
ENSMUSG00000020611	Gna13	1.14944	0.551383
ENSMUSG00000027173	Depdc7	1.14913	1.10021
ENSMUSG00000033083	Tbc1d4	1.14811	-0.00290634
ENSMUSG00000039081	Zfp503	1.14791	0.506084
ENSMUSG00000026317	Cln8	1.14596	0.708083
ENSMUSG00000037253	Mex3c	1.14562	0.815941
ENSMUSG00000046186	Cd109	1.14368	0.819183
ENSMUSG00000060860	Ube2s	1.14342	1.29629
ENSMUSG00000060780	Lrrtm1	1.14324	1.58761
ENSMUSG00000061143	Maml3	1.14262	0.130947
ENSMUSG00000011096	Akt1s1	1.14249	1.11943
ENSMUSG00000029177	Cenpa	1.14152	1.1565
ENSMUSG00000022641	Bbx	1.13707	1.71153
ENSMUSG00000042133	Ppig	1.13646	0.576482
ENSMUSG00000061013	Mkx	1.13573	1.26933
ENSMUSG00000033618	Map3k13	1.1339	0.569206
ENSMUSG00000046688	Tifa	1.13324	0.345824
ENSMUSG00000052504	Epha3	1.13113	0.434096
ENSMUSG00000094936	Rbm4	1.13014	0.854038
ENSMUSG00000037960	1110007C09Rik	1.12859	0.880557
ENSMUSG00000045248	Med26	1.12785	1.0948
ENSMUSG00000025665	Rps6ka6	1.12726	0.807728
ENSMUSG00000052942	Glis3	1.12682	0.610346
ENSMUSG00000070871	Ccnyl1	1.12516	0.738631
ENSMUSG00000064145	Arih2	1.1242	0.85558
ENSMUSG00000005483	Dnajb1	1.12343	1.06984
ENSMUSG00000029161	Cgref1	1.12286	0.612161
ENSMUSG00000022094	Slc39a14	1.12172	0.00927666
ENSMUSG00000038212	Hiatl1	1.12013	0.885184
ENSMUSG00000033581	Igf2bp2	1.11962	1.05675
ENSMUSG00000066189	Cacng3	1.11918	0.7375
ENSMUSG00000041153	Osgin2	1.11828	0.71531
ENSMUSG00000056313	1810011O10Rik	1.11789	1.19794
ENSMUSG00000018476	Kdm6b	1.11761	0.550802
ENSMUSG00000042772	Smg7	1.117	0.696861
ENSMUSG00000033760	Rbm4b	1.11695	1.09956
ENSMUSG00000051316	Taf7	1.11663	0.762411
ENSMUSG00000030259	Rassf8	1.11558	0.952037
ENSMUSG00000032846	Zswim6	1.11472	0.738139
ENSMUSG00000028413	B4galt1	1.11458	1.04816
ENSMUSG00000022443	Myh9	1.11448	0.503381
ENSMUSG00000027007	Ssfa2	1.11379	1.26608
ENSMUSG00000086290	Snhg12	1.11337	1.59565
ENSMUSG00000048540	Nhlh2	1.11171	0.505563
ENSMUSG00000027907	S100a11	1.11025	1.21939
ENSMUSG00000026663	Atf6	1.1102	0.755956
ENSMUSG00000034908	Sidt2	1.10971	1.02191
ENSMUSG00000082229	Nap1l2	1.10959	1.01715
ENSMUSG00000034663	Bmp2k	1.1095	1.09181
ENSMUSG00000038855	Itpkb	1.10773	0.174409
ENSMUSG00000095139	Pou3f2	1.10715	0.569085
ENSMUSG00000007655	Cav1	1.10631	0.408164
ENSMUSG00000024143	Rhoq	1.10618	0.925578
ENSMUSG00000041718	Alg13	1.10461	0.824612
ENSMUSG00000053510	Nrd1	1.10371	0.750283
ENSMUSG00000061130	Ppm1b	1.10354	0.658036
ENSMUSG00000022044	Stmn4	1.10237	1.26713
ENSMUSG00000052681	Rap1b	1.10153	1.02731
ENSMUSG00000028309	Rnf20	1.1014	0.785735
ENSMUSG00000024614	Tmx3	1.10019	0.744108
ENSMUSG00000062300	Pvrl2	1.09983	1.11864
ENSMUSG00000027361	Gabpb1	1.09971	0.963001
ENSMUSG00000028527	Ak4	1.09951	1.13891
ENSMUSG00000022426	Josd1	1.09681	0.918726
ENSMUSG00000026600	Soat1	1.09601	0.987391
ENSMUSG00000059288	Cdyl	1.09586	0.365934
ENSMUSG00000024583	Txnl1	1.09581	1.00653
ENSMUSG00000038866	Zcchc2	1.09569	0.629847
ENSMUSG00000004044	Ptrf	1.0948	1.48531
ENSMUSG00000029072	Tas1r3	1.09347	0.46619
ENSMUSG00000020892	Aloxe3	1.09346	1.07993
ENSMUSG00000031538	Plat	1.09251	0.843414
ENSMUSG00000025060	Slk	1.09189	0.401719
ENSMUSG00000035783	Acta2	1.09149	0.653848
ENSMUSG00000014496	Ankrd28	1.0903	0.90548
ENSMUSG00000034751	Mast4	1.09003	0.736057
ENSMUSG00000056666	Retsat	1.0898	1.06026
ENSMUSG00000049804	Armcx4	1.08938	0.68747
ENSMUSG00000029761	Cald1	1.08904	0.621703
ENSMUSG00000063049	Ing2	1.08762	1.32615
ENSMUSG00000070822	Zscan18	1.08743	0.901325
ENSMUSG00000029246	Ppat	1.08605	0.673319
ENSMUSG00000026730	Pter	1.08419	0.878015
ENSMUSG00000022131	Gpr180	1.08229	1.15102
ENSMUSG00000026121	Sema4c	1.08043	0.529809
ENSMUSG00000026819	Slc25a25	1.07903	0.782113
ENSMUSG00000040495	Chrm4	1.07836	1.07771
ENSMUSG00000038550	Ciart	1.07547	1.50503
ENSMUSG00000038400	Pmepa1	1.07455	1.0433
ENSMUSG00000030660	Pik3c2a	1.07242	0.481551
ENSMUSG00000039782	Cpeb2	1.07118	1.39172
ENSMUSG00000049612	Omg	1.07004	1.26508
ENSMUSG00000023963	Cyp39a1	1.06904	1.10039
ENSMUSG00000032715	Trib3	1.06904	0.211772
ENSMUSG00000032316	Clk3	1.06882	1.06992
ENSMUSG00000004591	Pkn2	1.0687	0.671204
ENSMUSG00000090673	Gm340	1.0681	0.331864
ENSMUSG00000053091	Lins	1.06713	0.975184
ENSMUSG00000063919	Srrm4	1.06474	0.237056
ENSMUSG00000034377	Tulp4	1.06306	0.563532
ENSMUSG00000002983	Relb	1.06233	0.530465
ENSMUSG00000031441	Atp11a	1.06171	0.511617
ENSMUSG00000031490	Eif4ebp1	1.0604	0.712847
ENSMUSG00000055421	Pcdh9	1.05977	1.14776
ENSMUSG00000022236	Ropn1l	1.0591	2.08427
ENSMUSG00000040289	Hey1	1.05836	1.41792
ENSMUSG00000022359	Wdyhv1	1.05782	1.23018
ENSMUSG00000029446	Psph	1.05702	1.57459
ENSMUSG00000017999	Ddx27	1.05552	1.11628
ENSMUSG00000030560	Ctsc	1.05494	1.15152
ENSMUSG00000029642	Polr1d	1.05191	1.06811
ENSMUSG00000031644	Nek1	1.05083	0.749652
ENSMUSG00000028494	Plin2	1.05023	0.984655
ENSMUSG00000039405	Prss23	1.05015	0.680538
ENSMUSG00000016528	Mapkapk2	1.05	0.782672
ENSMUSG00000049470	Aff4	1.04936	0.633209
ENSMUSG00000020580	Rock2	1.0491	0.491382
ENSMUSG00000030232	Aebp2	1.04891	0.802348
ENSMUSG00000089824	Rbm12	1.04714	-0.141461
ENSMUSG00000054976	Nyap2	1.04708	1.08069
ENSMUSG00000089911	Hiat1	1.04462	1.11418
ENSMUSG00000004319	Clcn3	1.04397	0.78165
ENSMUSG00000028034	Fubp1	1.04375	0.51813
ENSMUSG00000031297	Slc7a3	1.04365	1.13931
ENSMUSG00000028640	Tfap2c	1.04206	-0.504663
ENSMUSG00000027177	Hipk3	1.04145	1.04403
ENSMUSG00000047407	Tgif1	1.04015	1.63454
ENSMUSG00000018900	Slc22a5	1.03999	0.828648
ENSMUSG00000042364	Snx18	1.03958	1.02711
ENSMUSG00000069833	Ahnak	1.03675	1.21635
ENSMUSG00000021822	Plau	1.03551	0.720474
ENSMUSG00000035299	Mid1	1.03474	0.582745
ENSMUSG00000032280	Tle3	1.03202	0.719889
ENSMUSG00000005958	Ephb3	1.0307	0.943693
ENSMUSG00000038456	Dennd2a	1.03023	0.87245
ENSMUSG00000021243	Fcf1	1.02709	0.894659
ENSMUSG00000027811	4930579G24Rik	1.02576	2.25163
ENSMUSG00000070730	Rmdn3	1.02536	0.738712
ENSMUSG00000022770	Dlg1	1.02523	0.644324
ENSMUSG00000043284	Tmem11	1.02501	1.08099
ENSMUSG00000024360	Etf1	1.02405	0.752374
ENSMUSG00000060402	Chst8	1.02367	0.513558
ENSMUSG00000029401	Rilpl2	1.022	0.690805
ENSMUSG00000022614	Lmf2	1.0219	0.736478
ENSMUSG00000078651	Aoc2	1.01961	0.806055
ENSMUSG00000001870	Ltbp1	1.0194	0.870304
ENSMUSG00000022369	Mtbp	1.0188	0.955211
ENSMUSG00000022283	Pabpc1	1.01465	0.871658
ENSMUSG00000033319	Fem1c	1.01354	0.600112
ENSMUSG00000032733	Snx33	1.01101	0.840808
ENSMUSG00000037031	Tspan15	1.0109	0.747251
ENSMUSG00000020441	2310033P09Rik	1.01075	0.620278
ENSMUSG00000024048	Myl12a	1.01052	1.16989
ENSMUSG00000024378	Stard4	1.01024	0.574035
ENSMUSG00000026335	Pam	1.00987	0.518456
ENSMUSG00000032009	Sesn3	1.00979	0.401416
ENSMUSG00000056692	D17Wsu92e	1.00845	0.492812
ENSMUSG00000028680	Plk3	1.00781	1.03616
ENSMUSG00000053332	Gas5	1.00763	1.21887
ENSMUSG00000029068	Ccnl2	1.00644	0.669495
ENSMUSG00000038255	Neurod2	1.00643	0.528223
ENSMUSG00000003752	Itpkc	1.00587	0.261669
ENSMUSG00000034336	Ina	1.00244	0.780302
ENSMUSG00000040270	Bach2	1.00224	0.54113
ENSMUSG00000044934	Zfp367	1.00085	1.21673
ENSMUSG00000035828	Pim3	1.00062	1.29236
ENSMUSG00000025351	Cd63	1.00005	1.04469
ENSMUSG00000027456	Sdcbp2	0.999917	1.52279
ENSMUSG00000003228	Grk5	0.998131	0.655575
ENSMUSG00000067879	3110035E14Rik	0.997776	0.65186
ENSMUSG00000028191	Bcl10	0.997524	0.629855
ENSMUSG00000060126	Tpt1	0.99677	1.1383
ENSMUSG00000020283	Pex13	0.996282	0.103257
ENSMUSG00000021224	Numb	0.996045	0.175909
ENSMUSG00000031532	Saraf	0.994963	1.11428
ENSMUSG00000023852	Chd1	0.994476	0.782807
ENSMUSG00000039004	Bmp6	0.993918	0.710568
ENSMUSG00000003949	Hlf	0.993063	0.756234
ENSMUSG00000014329	Bicc1	0.992586	0.158691
ENSMUSG00000045515	Pou3f3	0.992169	1.11665
ENSMUSG00000072872	Rybp	0.991571	0.727971
ENSMUSG00000020695	Mrc2	0.990372	0.801248
ENSMUSG00000040250	Asun	0.990111	0.871539
ENSMUSG00000025321	Itgb8	0.989846	1.02788
ENSMUSG00000038806	Sde2	0.989215	0.657961
ENSMUSG00000040010	Slc7a5	0.989001	0.474084
ENSMUSG00000070576	Mn1	0.987724	0.517448
ENSMUSG00000034297	Med13	0.987626	0.248497
ENSMUSG00000021699	Pde4d	0.986804	0.735735
ENSMUSG00000054196	Cthrc1	0.986771	1.02855
ENSMUSG00000039130	Zc3hc1	0.986119	0.909318
ENSMUSG00000008200	Fnbp4	0.9851	0.736702
ENSMUSG00000007041	Clic1	0.984192	1.0956
ENSMUSG00000030779	Rbbp6	0.983853	0.631038
ENSMUSG00000035992	Fnip1	0.982896	0.738453
ENSMUSG00000023885	Thbs2	0.982803	1.44152
ENSMUSG00000035692	Isg15	0.982448	1.00189
ENSMUSG00000017144	Rnd3	0.981235	1.34843
ENSMUSG00000062248	Cks2	0.980095	0.576261
ENSMUSG00000035355	Kcnh4	0.980006	0.667011
ENSMUSG00000041328	Pcf11	0.979087	1.03209
ENSMUSG00000020069	Hnrnph3	0.978771	1.14799
ENSMUSG00000035105	Egln3	0.978442	0.762019
ENSMUSG00000021134	Srsf5	0.978349	1.03559
ENSMUSG00000009291	Pttg1ip	0.978052	0.801366
ENSMUSG00000032503	Arpp21	0.975908	0.693898
ENSMUSG00000037896	Rcor1	0.974818	0.80966
ENSMUSG00000040710	St8sia4	0.97458	0.576631
ENSMUSG00000035569	Ankrd11	0.974353	0.623964
ENSMUSG00000030095	Tmem43	0.969779	0.602547
ENSMUSG00000027423	Snx5	0.969179	1.02059
ENSMUSG00000029669	Tspan12	0.967784	1.03048
ENSMUSG00000030313	Dennd5b	0.966607	0.694521
ENSMUSG00000023953	Polh	0.965931	0.509769
ENSMUSG00000042682	Selk	0.965739	1.0719
ENSMUSG00000038679	Trps1	0.965656	0.728362
ENSMUSG00000029149	Krtcap3	0.963352	0.711909
ENSMUSG00000026193	Fn1	0.961291	0.71475
ENSMUSG00000019794	Katna1	0.960528	1.18562
ENSMUSG00000043131	Mob1a	0.959981	0.31781
ENSMUSG00000052397	Ezr	0.958426	1.02769
ENSMUSG00000035242	Oaz1	0.956459	1.16638
ENSMUSG00000032251	Irak1bp1	0.956405	0.839138
ENSMUSG00000031171	Ftsj1	0.956346	0.88773
ENSMUSG00000029670	Ing3	0.955607	1.11354
ENSMUSG00000051335	Gfod1	0.955495	0.131926
ENSMUSG00000017723	Wfdc2	0.954647	0.247872
ENSMUSG00000051403	Ppp1r37	0.954552	0.311042
ENSMUSG00000028793	Rnf19b	0.954147	0.787841
ENSMUSG00000036764	Dnajc12	0.95373	1.19702
ENSMUSG00000038520	Tbc1d17	0.953661	0.630664
ENSMUSG00000097348	Rmst	0.953646	1.20118
ENSMUSG00000027952	Pmvk	0.95311	0.856938
ENSMUSG00000040225	Prrc2c	0.951715	0.740416
ENSMUSG00000031796	Cfap20	0.951342	1.2891
ENSMUSG00000036273	Lrrk2	0.951182	0.884527
ENSMUSG00000021796	Bmpr1a	0.951004	0.594795
ENSMUSG00000040918	Slc19a2	0.950488	0.834953
ENSMUSG00000028920	Fbxo42	0.949403	0.646734
ENSMUSG00000014077	Chp1	0.948971	0.50674
ENSMUSG00000037992	Rara	0.948456	0.293096
ENSMUSG00000039578	Ccser1	0.947324	0.99581
ENSMUSG00000031207	Msn	0.946626	0.592326
ENSMUSG00000070284	Gmppb	0.945136	0.673269
ENSMUSG00000050912	Tmem123	0.94475	-0.24485
ENSMUSG00000032526	Deb1	0.944303	1.16513
ENSMUSG00000022255	Mtdh	0.944013	0.844815
ENSMUSG00000061207	Stk19	0.942749	1.224
ENSMUSG00000039218	Srrm2	0.941779	0.864294
ENSMUSG00000020108	Ddit4	0.941644	1.44535
ENSMUSG00000036411	9530077C05Rik	0.941552	0.695533
ENSMUSG00000039328	Rnf122	0.94132	0.378607
ENSMUSG00000066406	Akap13	0.939353	0.67801
ENSMUSG00000057637	Prdm2	0.938699	0.162729
ENSMUSG00000004040	Stat3	0.938687	0.834387
ENSMUSG00000031661	Nkd1	0.936238	0.331996
ENSMUSG00000010095	Slc3a2	0.936053	1.02007
ENSMUSG00000031555	Adam9	0.93454	0.570143
ENSMUSG00000039988	Ankrd13c	0.933404	0.644243
ENSMUSG00000074971	Fibin	0.931971	1.92006
ENSMUSG00000063450	Syne2	0.931719	-0.343062
ENSMUSG00000002881	Nab1	0.931577	0.649606
ENSMUSG00000035067	Xkr6	0.930975	0.69702
ENSMUSG00000022280	Rnf19a	0.930708	0.762287
ENSMUSG00000041736	Tspo	0.930541	0.785923
ENSMUSG00000078919	Dpm1	0.929985	0.915233
ENSMUSG00000044548	Dact1	0.929163	0.777517
ENSMUSG00000029767	Calu	0.929002	0.730102
ENSMUSG00000063810	Alms1	0.927446	0.687784
ENSMUSG00000070565	Rasal2	0.927029	0.127424
ENSMUSG00000027782	Kpna4	0.926811	0.393266
ENSMUSG00000021848	Otx2	0.926494	1.68549
ENSMUSG00000030342	Cd9	0.925882	0.980392
ENSMUSG00000039676	Capsl	0.925514	1.07774
ENSMUSG00000060671	Atp8b2	0.924828	0.439154
ENSMUSG00000030595	Nfkbib	0.923867	0.855127
ENSMUSG00000053198	Prx	0.922854	1.37734
ENSMUSG00000031485	Prosc	0.922098	0.605518
ENSMUSG00000027397	Slc20a1	0.918864	0.64797
ENSMUSG00000037573	Tob1	0.918069	1.24376
ENSMUSG00000093803	Ppp2r3d	0.916513	0.865207
ENSMUSG00000025162	Csnk1d	0.916184	0.500879
ENSMUSG00000035566	Pcdh17	0.916119	0.456219
ENSMUSG00000037211	Spry1	0.913414	1.74475
ENSMUSG00000001260	Gabrg1	0.912671	0.485662
ENSMUSG00000020354	Sgcd	0.912598	1.12517
ENSMUSG00000074656	Eif2s2	0.912257	0.882811
ENSMUSG00000032267	Usp28	0.911097	0.186946
ENSMUSG00000078552	Dcdc2b	0.910767	0.326853
ENSMUSG00000038059	Smim3	0.909669	1.46233
ENSMUSG00000049047	Armcx3	0.909611	0.653295
ENSMUSG00000006705	Pknox1	0.90847	0.18805
ENSMUSG00000016534	Lamp2	0.90723	0.735806
ENSMUSG00000029524	Sirt4	0.906196	1.06918
ENSMUSG00000027894	Slc6a17	0.905672	0.575715
ENSMUSG00000028273	Pdlim5	0.905211	0.629144
ENSMUSG00000038975	Rabggtb	0.905168	0.854156
ENSMUSG00000037894	H2afz	0.90441	0.995997
ENSMUSG00000032766	Gng11	0.90396	1.35967
ENSMUSG00000033161	Atp1a1	0.903567	0.771448
ENSMUSG00000021027	Ralgapa1	0.901089	0.550281
ENSMUSG00000070733	Fryl	0.900978	0.377001
ENSMUSG00000022500	Litaf	0.900817	0.782806
ENSMUSG00000030967	Zranb1	0.90032	0.768152
ENSMUSG00000026042	Col5a2	0.900111	0.762126
ENSMUSG00000026478	Lamc1	0.899485	0.403092
ENSMUSG00000045817	Zfp36l2	0.899016	1.50087
ENSMUSG00000026617	Bpnt1	0.89713	0.21961
ENSMUSG00000077704	Snord89	0.897008	0.595506
ENSMUSG00000032254	Kif23	0.895964	0.555285
ENSMUSG00000063897	DHRSX	0.895882	0.529073
ENSMUSG00000035293	G2e3	0.894075	0.641358
ENSMUSG00000041624	Gucy1a2	0.893236	0.292812
ENSMUSG00000001995	Sipa1l2	0.892363	0.217175
ENSMUSG00000040751	Lat2	0.892123	1.21542
ENSMUSG00000047495	Dlgap2	0.892011	0.138137
ENSMUSG00000025612	Bach1	0.891856	0.501323
ENSMUSG00000041313	Slc7a1	0.891682	0.590484
ENSMUSG00000021830	Txndc16	0.891249	0.728373
ENSMUSG00000021466	Ptch1	0.88974	0.793136
ENSMUSG00000042625	Safb2	0.889727	0.560159
ENSMUSG00000030895	Hpx	0.889509	2.52406
ENSMUSG00000051355	Commd1	0.889467	0.820763
ENSMUSG00000027287	Snap23	0.88938	0.316957
ENSMUSG00000043154	Ppp2r3a	0.887696	0.594957
ENSMUSG00000031024	St5	0.887641	0.277274
ENSMUSG00000001687	Ubl3	0.887371	1.08967
ENSMUSG00000021460	Auh	0.887133	0.958625
ENSMUSG00000019132	BC005537	0.886751	0.651498
ENSMUSG00000042751	Nmnat2	0.886432	0.4849
ENSMUSG00000042349	Ikbke	0.88576	1.17754
ENSMUSG00000025372	Baiap2	0.885661	0.395474
ENSMUSG00000054611	Kdm2a	0.883977	0.165822
ENSMUSG00000030671	Pde3b	0.883777	0.738799
ENSMUSG00000021253	Tgfb3	0.883726	0.338002
ENSMUSG00000030103	Bhlhe40	0.881525	0.707044
ENSMUSG00000029684	Wasl	0.881317	0.36269
ENSMUSG00000019838	Slc16a10	0.881064	1.10588
ENSMUSG00000035530	Eif1	0.880553	1.01313
ENSMUSG00000029545	Acads	0.880239	0.279668
ENSMUSG00000061762	Tac1	0.879581	1.47163
ENSMUSG00000024067	Dpy30	0.878088	0.892407
ENSMUSG00000038943	Prc1	0.877055	0.77866
ENSMUSG00000038539	Atf5	0.876768	0.89155
ENSMUSG00000032839	Trpc1	0.87568	0.514241
ENSMUSG00000024726	2410127L17Rik	0.874868	0.344556
ENSMUSG00000042903	Foxo4	0.8744	0.245754
ENSMUSG00000027601	Mtfr1	0.873115	0.110837
ENSMUSG00000016128	Stard13	0.872949	1.09979
ENSMUSG00000019880	Rspo3	0.872863	-0.100038
ENSMUSG00000032359	Ctsh	0.872219	0.528968
ENSMUSG00000064127	Med14	0.870668	0.34095
ENSMUSG00000068823	Csde1	0.86959	0.831909
ENSMUSG00000041688	Amot	0.868804	0.624637
ENSMUSG00000049969	Plekhf2	0.867923	0.889104
ENSMUSG00000058799	Nap1l1	0.867819	0.821619
ENSMUSG00000052062	Pard3b	0.867528	0.190479
ENSMUSG00000044148	1810030O07Rik	0.865605	0.603986
ENSMUSG00000022507	1810013L24Rik	0.864796	0.413765
ENSMUSG00000097195	Snhg5	0.86357	1.02111
ENSMUSG00000032332	Col12a1	0.862251	0.963817
ENSMUSG00000036192	Rorb	0.861917	0.294228
ENSMUSG00000020715	Ern1	0.86145	0.063794
ENSMUSG00000024601	Isoc1	0.860147	0.585125
ENSMUSG00000028351	Brinp1	0.859835	0.642378
ENSMUSG00000020432	Tcn2	0.85817	0.834593
ENSMUSG00000021111	Papola	0.858046	0.487256
ENSMUSG00000048450	Msx1	0.857295	0.667871
ENSMUSG00000037364	Srrt	0.856592	0.402651
ENSMUSG00000020130	Tbc1d15	0.85452	0.742605
ENSMUSG00000047213	Ythdf3	0.853773	0.595355
ENSMUSG00000060802	B2m	0.853623	0.953717
ENSMUSG00000038150	Ormdl3	0.851259	0.777616
ENSMUSG00000030056	Isy1	0.850784	-0.0429145
ENSMUSG00000046982	Tshz1	0.850475	0.924185
ENSMUSG00000070436	Serpinh1	0.850469	0.293591
ENSMUSG00000041297	Cdk13	0.850426	0.493309
ENSMUSG00000025666	Tmem47	0.850279	0.771448
ENSMUSG00000000628	Hk2	0.850239	2.01414
ENSMUSG00000037851	Iars	0.848554	0.479478
ENSMUSG00000001089	Luzp1	0.848135	0.189895
ENSMUSG00000029661	Col1a2	0.847792	0.486527
ENSMUSG00000055733	Nap1l3	0.846719	0.813313
ENSMUSG00000022521	Crebbp	0.846652	0.38756
ENSMUSG00000058709	Egln2	0.846603	0.639975
ENSMUSG00000047648	Fbxo30	0.845726	0.416308
ENSMUSG00000027552	E2f5	0.845623	0.8425
ENSMUSG00000023947	Nfkbie	0.845495	0.371413
ENSMUSG00000065422	Mir221	0.843929	-0.67405
ENSMUSG00000040843	Tiprl	0.841942	0.762433
ENSMUSG00000044201	Cdc25c	0.841816	1.05971
ENSMUSG00000020592	Sdc1	0.841443	0.772716
ENSMUSG00000014907	Naf1	0.840754	1.11148
ENSMUSG00000042626	Shc1	0.840173	0.268597
ENSMUSG00000063804	Lin28b	0.83983	0.606567
ENSMUSG00000044149	Nkrf	0.837859	0.779265
ENSMUSG00000003549	Ercc1	0.837785	0.389044
ENSMUSG00000022200	Golph3	0.837586	0.598184
ENSMUSG00000025856	Pdgfa	0.837528	0.799365
ENSMUSG00000061731	Ext1	0.837213	0.653606
ENSMUSG00000000787	Ddx3x	0.836554	0.533648
ENSMUSG00000028842	Ago3	0.835637	0.50038
ENSMUSG00000021458	2010111I01Rik	0.835568	1.21238
ENSMUSG00000032531	Amotl2	0.835391	0.0841569
ENSMUSG00000005069	Pex5	0.835139	0.72314
ENSMUSG00000029304	Spp1	0.834968	0.607464
ENSMUSG00000049878	Rlf	0.834939	0.492169
ENSMUSG00000021215	Net1	0.833373	0.852748
ENSMUSG00000063800	Prpf38a	0.832737	0.534885
ENSMUSG00000069135	Fgfr1op	0.832693	0.657308
ENSMUSG00000019818	Cd164	0.831103	0.658855
ENSMUSG00000049939	Lrrc4	0.831049	0.297661
ENSMUSG00000042508	Dmtf1	0.830654	0.637605
ENSMUSG00000022174	Dad1	0.830578	0.958436
ENSMUSG00000040482	Dxo	0.828522	0.956151
ENSMUSG00000034168	Irf2bpl	0.82774	0.663222
ENSMUSG00000034826	Nup54	0.826477	0.464408
ENSMUSG00000032717	Mdfi	0.826411	1.13361
ENSMUSG00000041552	Ptchd1	0.82603	0.691084
ENSMUSG00000078812	Eif5a	0.825687	0.955826
ENSMUSG00000064741	Snord14a	0.825353	1.39709
ENSMUSG00000038342	Mlxip	0.825318	0.279704
ENSMUSG00000043895	S1pr2	0.825299	0.573692
ENSMUSG00000024576	Csnk1a1	0.825121	0.616581
ENSMUSG00000004366	Sst	0.824812	1.06119
ENSMUSG00000078185	Chml	0.824673	0.567906
ENSMUSG00000027883	Gpsm2	0.824048	0.589863
ENSMUSG00000031167	Rbm3	0.823881	0.666001
ENSMUSG00000053110	Yap1	0.823572	1.00236
ENSMUSG00000034349	Smc4	0.823436	0.473062
ENSMUSG00000047881	Rell1	0.822689	0.701956
ENSMUSG00000061032	Rrp1	0.821056	0.861963
ENSMUSG00000023845	Lnpep	0.820185	0.278086
ENSMUSG00000036197	Gxylt1	0.820005	0.409327
ENSMUSG00000038732	Mboat1	0.819444	0.594053
ENSMUSG00000021377	Dek	0.818623	0.44162
ENSMUSG00000015143	Actn1	0.818399	0.222822
ENSMUSG00000037490	Slc2a12	0.816916	0.133567
ENSMUSG00000001020	S100a4	0.81588	1.37191
ENSMUSG00000040850	Psme4	0.815218	0.731872
ENSMUSG00000031714	Gab1	0.814113	0.925158
ENSMUSG00000024750	Zfand5	0.813098	0.851448
ENSMUSG00000058258	Idi1	0.812663	0.769187
ENSMUSG00000026004	Kansl1l	0.812562	0.676078
ENSMUSG00000049907	Rasl11b	0.812447	1.49678
ENSMUSG00000003072	Atp5d	0.812077	0.99489
ENSMUSG00000021670	Hmgcr	0.809737	0.716264
ENSMUSG00000047238	Mageh1	0.808084	0.918611
ENSMUSG00000078813	Leng1	0.807503	0.35559
ENSMUSG00000018565	Elp5	0.807502	0.74341
ENSMUSG00000036934	4921524J17Rik	0.807024	0.5651
ENSMUSG00000073542	Cep76	0.806745	0.545325
ENSMUSG00000038552	Fndc4	0.806052	0.772662
ENSMUSG00000060935	Tmem263	0.804243	0.818672
ENSMUSG00000019731	Slc35e1	0.803318	0.61903
ENSMUSG00000034042	Gpbp1l1	0.803175	0.114114
ENSMUSG00000023883	Phf10	0.802914	0.587037
ENSMUSG00000021752	Kctd6	0.802885	0.284344
ENSMUSG00000043541	Casc1	0.802799	2.65918
ENSMUSG00000038648	Creb3l2	0.802699	0.618691
ENSMUSG00000032688	Malt1	0.802472	0.3698
ENSMUSG00000083012	Fam220a	0.802418	0.68768
ENSMUSG00000025380	Fscn2	0.80201	0.624193
ENSMUSG00000071656	Lrrn4cl	0.801631	0.963907
ENSMUSG00000024593	Megf10	0.80118	0.322071
ENSMUSG00000042680	Garem	0.800972	-0.0734899
ENSMUSG00000066150	Slc31a1	0.800908	0.257204
ENSMUSG00000008540	Mgst1	0.800551	0.75897
ENSMUSG00000043099	Hic1	0.799739	0.368041
ENSMUSG00000026893	Gca	0.799706	0.0154294
ENSMUSG00000050315	Synpo2	0.797154	-0.151618
ENSMUSG00000019362	D8Ertd738e	0.79672	0.832334
ENSMUSG00000019539	Rcn3	0.796697	1.04542
ENSMUSG00000019564	Arid3a	0.795777	-0.091297
ENSMUSG00000038119	Cdon	0.794599	0.450159
ENSMUSG00000032194	Kank2	0.794549	0.129446
ENSMUSG00000024889	Rce1	0.794331	0.903137
ENSMUSG00000062234	Gak	0.794107	0.480857
ENSMUSG00000017146	Brca1	0.79358	0.190685
ENSMUSG00000001288	Rarg	0.792136	0.801494
ENSMUSG00000090841	Myl6	0.79134	1.0643
ENSMUSG00000001700	Gramd3	0.790548	0.907744
ENSMUSG00000038530	Rgs4	0.788567	1.06133
ENSMUSG00000020034	Tcp11l2	0.788486	0.43055
ENSMUSG00000064210	Ano6	0.788363	0.474897
ENSMUSG00000021585	Cast	0.787843	0.826878
ENSMUSG00000042298	Ttc19	0.787552	0.56833
ENSMUSG00000044216	Kcnj4	0.787525	0.435276
ENSMUSG00000041703	Zic5	0.787468	0.344504
ENSMUSG00000024056	Ndc80	0.787381	-0.133673
ENSMUSG00000031585	Gtf2e2	0.786244	0.476771
ENSMUSG00000046441	Cmtr2	0.785367	0.239964
ENSMUSG00000068523	Gng5	0.785035	0.970361
ENSMUSG00000037270	4932438A13Rik	0.784817	0.605159
ENSMUSG00000021306	Gpr137b	0.784739	0.702508
ENSMUSG00000028441	1110017D15Rik	0.783282	0.945104
ENSMUSG00000022744	Cldnd1	0.782929	0.726567
ENSMUSG00000098274	Rpl24	0.782658	1.20221
ENSMUSG00000039680	Mrps6	0.782363	1.08352
ENSMUSG00000006235	Epor	0.782187	1.47044
ENSMUSG00000003623	Crot	0.782045	0.362254
ENSMUSG00000029385	Ccng2	0.781855	1.08676
ENSMUSG00000021417	Eci2	0.781688	0.69902
ENSMUSG00000025358	Cdk2	0.78134	0.441327
ENSMUSG00000024776	Stambpl1	0.780596	0.604661
ENSMUSG00000063972	Nr6a1	0.779575	0.758499
ENSMUSG00000056537	Rlim	0.779251	0.381087
ENSMUSG00000008318	Relt	0.778708	1.06236
ENSMUSG00000041235	Chd7	0.777922	0.654536
ENSMUSG00000012296	Tjap1	0.777411	0.106404
ENSMUSG00000022665	Ccdc80	0.776097	0.387195
ENSMUSG00000043969	Emx2	0.776027	1.23338
ENSMUSG00000031434	Morc4	0.775809	0.702517
ENSMUSG00000037242	Clic4	0.774302	0.721097
ENSMUSG00000024587	Nars	0.772971	0.732027
ENSMUSG00000028826	Tmem57	0.771662	0.725647
ENSMUSG00000026034	Clk1	0.771474	1.04472
ENSMUSG00000028277	Ube2j1	0.771376	0.638795
ENSMUSG00000022419	Deptor	0.770844	0.977361
ENSMUSG00000048186	Bend7	0.768983	0.550492
ENSMUSG00000044340	Phlpp1	0.767783	0.524272
ENSMUSG00000027944	Hax1	0.766736	0.60599
ENSMUSG00000031523	Dlc1	0.766661	0.580529
ENSMUSG00000037887	Dusp8	0.76625	0.602684
ENSMUSG00000001419	Mef2d	0.765772	0.454031
ENSMUSG00000061517	Sox21	0.765679	1.03642
ENSMUSG00000022180	Slc7a8	0.765264	0.342824
ENSMUSG00000001280	Sp1	0.765133	0.0882106
ENSMUSG00000018379	Srsf1	0.764114	0.765373
ENSMUSG00000052911	Lamb2	0.763608	0.609911
ENSMUSG00000021838	Samd4	0.763517	0.265936
ENSMUSG00000015839	Nfe2l2	0.763327	0.728993
ENSMUSG00000028788	Ptp4a2	0.762562	0.439781
ENSMUSG00000035458	Tnni3	0.762374	1.37973
ENSMUSG00000026626	Ppp2r5a	0.762161	0.734769
ENSMUSG00000021360	Gcnt2	0.761858	0.890969
ENSMUSG00000055540	Epha6	0.761638	0.891904
ENSMUSG00000027968	Larp7	0.761479	0.341551
ENSMUSG00000033096	Apmap	0.761341	0.655392
ENSMUSG00000020088	Sar1a	0.760669	0.680625
ENSMUSG00000047126	Cltc	0.760565	0.379469
ENSMUSG00000035413	Tmem98	0.760143	0.549009
ENSMUSG00000039234	Sec24d	0.760002	0.28197
ENSMUSG00000026988	Wdsub1	0.759942	1.21759
ENSMUSG00000056050	Mia3	0.759819	0.490712
ENSMUSG00000046519	Golph3l	0.75821	0.485444
ENSMUSG00000042743	Sgtb	0.757571	0.459422
ENSMUSG00000018425	Dhx40	0.757066	0.629006
ENSMUSG00000029752	Asns	0.756641	0.868673
ENSMUSG00000003420	Fcgrt	0.755026	1.06849
ENSMUSG00000041219	Arhgap11a	0.754196	0.409013
ENSMUSG00000058587	Tmod3	0.753749	0.574528
ENSMUSG00000021000	Ctage5	0.753723	0.506537
ENSMUSG00000025255	Zfhx4	0.753394	0.520264
ENSMUSG00000028560	Usp1	0.753058	0.981128
ENSMUSG00000008730	Hipk1	0.752752	0.536858
ENSMUSG00000024290	Rock1	0.751957	0.430253
ENSMUSG00000032221	Mns1	0.751821	0.098151
ENSMUSG00000038074	Fkbp14	0.750389	0.615528
ENSMUSG00000024827	Gldc	0.750343	0.263453
ENSMUSG00000034205	Loxl2	0.750092	0.842819
ENSMUSG00000020593	Lpin1	0.749561	0.255868
ENSMUSG00000028060	2810403A07Rik	0.748375	0.580691
ENSMUSG00000032238	Rora	0.747808	1.04996
ENSMUSG00000004085	Zak	0.747499	0.038424
ENSMUSG00000006678	Pola1	0.746938	0.682229
ENSMUSG00000042496	Prdm10	0.74689	0.566949
ENSMUSG00000028552	Eps15	0.746584	0.712581
ENSMUSG00000023150	Ivns1abp	0.745679	0.802696
ENSMUSG00000016831	Tox4	0.745025	0.535935
ENSMUSG00000027215	Cd82	0.744653	0.812294
ENSMUSG00000035901	Dennd5a	0.744225	0.305259
ENSMUSG00000020493	Prr11	0.743507	0.22326
ENSMUSG00000005615	Pcyt1a	0.740462	0.162182
ENSMUSG00000039633	Lonrf1	0.738987	0.185548
ENSMUSG00000026043	Col3a1	0.738833	0.546472
ENSMUSG00000026836	Acvr1	0.737924	0.804611
ENSMUSG00000069539	Scyl2	0.736569	0.302725
ENSMUSG00000025089	Gfra1	0.734607	0.0140648
ENSMUSG00000031274	Col4a5	0.734462	0.430782
ENSMUSG00000033106	Slc7a6os	0.734357	0.736131
ENSMUSG00000038722	Bud31	0.733577	0.657963
ENSMUSG00000041453	Rpl21	0.733354	0.95435
ENSMUSG00000039202	Abhd2	0.733002	0.405121
ENSMUSG00000049184	Purg	0.732691	0.381407
ENSMUSG00000029110	Rnf4	0.732199	0.469101
ENSMUSG00000003847	Nfat5	0.731834	0.63261
ENSMUSG00000025353	Ormdl2	0.731703	0.388042
ENSMUSG00000021719	Rgs7bp	0.731532	0.660993
ENSMUSG00000021374	Nup153	0.731232	0.232405
ENSMUSG00000028019	Pdgfc	0.731157	0.938786
ENSMUSG00000071604	Fam189a2	0.73102	0.386159
ENSMUSG00000031963	Bmper	0.730573	0.725098
ENSMUSG00000074746	Pdzd8	0.729457	0.345722
ENSMUSG00000007989	Fzd3	0.72891	0.736018
ENSMUSG00000062078	Qk	0.727713	0.946712
ENSMUSG00000030718	Ppme1	0.726842	0.485887
ENSMUSG00000033685	Ucp2	0.726407	0.458597
ENSMUSG00000033502	Cdc14a	0.726072	1.19271
ENSMUSG00000044647	Csrnp3	0.725471	0.379594
ENSMUSG00000020111	Micu1	0.725329	0.392737
ENSMUSG00000022855	Senp2	0.724664	0.452618
ENSMUSG00000045294	Insig1	0.723341	0.737642
ENSMUSG00000045210	Vcpip1	0.723128	0.101312
ENSMUSG00000027654	Fam83d	0.722795	1.10102
ENSMUSG00000039361	Picalm	0.722148	0.603862
ENSMUSG00000025192	Entpd7	0.721691	0.591546
ENSMUSG00000037119	D15Ertd621e	0.721677	-0.00328243
ENSMUSG00000034401	Spata6	0.721496	0.460222
ENSMUSG00000020859	Spag9	0.721158	0.345114
ENSMUSG00000021775	Nr1d2	0.720663	0.8191
ENSMUSG00000055991	Zkscan5	0.720452	0.025415
ENSMUSG00000027168	Pax6	0.720406	0.188035
ENSMUSG00000032434	Cmtm6	0.720242	0.12365
ENSMUSG00000036446	Lum	0.71985	0.311232
ENSMUSG00000060594	Layn	0.718107	0.766244
ENSMUSG00000040734	Ppp1r13l	0.717815	0.578407
ENSMUSG00000033417	Cacul1	0.717564	0.172646
ENSMUSG00000064342	mt-Ti	0.716666	0.876046
ENSMUSG00000028438	Kif24	0.716653	0.206078
ENSMUSG00000092558	Med20	0.715224	0.485444
ENSMUSG00000027808	Serp1	0.714747	0.6135
ENSMUSG00000044906	4930503L19Rik	0.71461	0.469816
ENSMUSG00000034997	Htr2a	0.714407	0.201784
ENSMUSG00000022687	Boc	0.714123	1.30116
ENSMUSG00000039646	Vasn	0.713658	0.812655
ENSMUSG00000028821	Syf2	0.7136	0.634408
ENSMUSG00000031729	Ist1	0.71346	0.694635
ENSMUSG00000019907	Ppp1r12a	0.713438	0.363799
ENSMUSG00000022617	Chkb	0.713126	0.921552
ENSMUSG00000020349	Ppp2ca	0.712859	0.723536
ENSMUSG00000022150	Dab2	0.712598	0.327026
ENSMUSG00000020300	Cpeb4	0.712522	0.198266
ENSMUSG00000000184	Ccnd2	0.711745	0.322709
ENSMUSG00000031568	Rwdd4a	0.711708	0.224457
ENSMUSG00000041769	Ppp2r2d	0.711595	0.72391
ENSMUSG00000005125	Ndrg1	0.711208	0.580879
ENSMUSG00000022656	Pvrl3	0.710024	0.729896
ENSMUSG00000003617	Cp	0.708614	0.636557
ENSMUSG00000030629	Zfand6	0.708467	0.664076
ENSMUSG00000000028	Cdc45	0.708394	-0.137181
ENSMUSG00000023075	Akirin1	0.707934	0.548874
ENSMUSG00000070544	Top1	0.707457	0.219088
ENSMUSG00000032754	Slc8b1	0.706985	1.20762
ENSMUSG00000027593	Raly	0.706589	0.735688
ENSMUSG00000027940	Tpm3	0.706115	0.555644
ENSMUSG00000046961	Gpr156	0.705825	-0.187252
ENSMUSG00000035614	Fam179b	0.705576	0.323264
ENSMUSG00000015501	Hivep2	0.70475	0.160642
ENSMUSG00000015647	Lama5	0.704359	0.550467
ENSMUSG00000034457	Eda2r	0.703635	0.247789
ENSMUSG00000034154	Ino80	0.703362	0.505522
ENSMUSG00000028348	Murc	0.702278	0.121724
ENSMUSG00000018593	Sparc	0.702036	0.48102
ENSMUSG00000051111	Sv2c	0.701996	0.425216
ENSMUSG00000019558	Slc6a8	0.700667	0.456393
ENSMUSG00000023022	Lima1	0.699127	0.523959
ENSMUSG00000028532	Cachd1	0.698784	0.203427
ENSMUSG00000025007	Aldh18a1	0.698562	0.278643
ENSMUSG00000002996	Hbp1	0.698074	0.699783
ENSMUSG00000019873	Reep3	0.698013	0.106847
ENSMUSG00000031004	Mki67	0.697854	0.419201
ENSMUSG00000028041	Adam15	0.69696	0.718124
ENSMUSG00000025572	Tmc6	0.694936	0.70078
ENSMUSG00000027227	Sord	0.694929	0.579641
ENSMUSG00000006333	Rps9	0.694856	0.9384
ENSMUSG00000025001	Hells	0.694661	0.159739
ENSMUSG00000062202	Btbd9	0.694644	0.327853
ENSMUSG00000029086	Prom1	0.693805	0.850334
ENSMUSG00000025764	Jade1	0.692543	0.372447
ENSMUSG00000018362	Kpna2	0.690951	0.557459
ENSMUSG00000044636	Csrnp2	0.690162	-0.000653443
ENSMUSG00000027379	Bub1	0.690123	0.382444
ENSMUSG00000041702	Btbd7	0.690115	0.222195
ENSMUSG00000032802	Srxn1	0.6898	0.510852
ENSMUSG00000042305	Tmem183a	0.688609	0.574126
ENSMUSG00000022434	Fam118a	0.688608	0.937588
ENSMUSG00000039286	Fndc3b	0.68855	0.554488
ENSMUSG00000053289	Ddx10	0.68844	0.572137
ENSMUSG00000027508	Pag1	0.688395	0.385772
ENSMUSG00000064225	Paqr9	0.68786	0.47029
ENSMUSG00000017548	Suz12	0.687695	0.37232
ENSMUSG00000061983	Rps12	0.687587	1.04407
ENSMUSG00000003068	Stk11	0.687534	0.803742
ENSMUSG00000027699	Ect2	0.686917	0.426164
ENSMUSG00000038274	Fau	0.685578	1.19549
ENSMUSG00000044674	Fzd1	0.684922	0.706992
ENSMUSG00000030744	Rps3	0.684834	0.968233
ENSMUSG00000028701	Lurap1	0.684812	-0.189526
ENSMUSG00000030643	Rab30	0.6845	0.351122
ENSMUSG00000060639	Hist1h4i	0.684412	0.362237
ENSMUSG00000001156	Mxd1	0.684369	0.0399576
ENSMUSG00000030465	Psd3	0.684126	0.243755
ENSMUSG00000006941	Eif1b	0.683516	0.899465
ENSMUSG00000054823	Whsc1l1	0.683338	0.386977
ENSMUSG00000067279	Ppp1r3c	0.683207	0.876478
ENSMUSG00000032899	Styk1	0.683194	0.463651
ENSMUSG00000047844	Bex4	0.683159	1.00786
ENSMUSG00000040856	Dlk1	0.682344	0.880144
ENSMUSG00000021431	Snrnp48	0.681335	0.677752
ENSMUSG00000032402	Smad3	0.680749	0.0499592
ENSMUSG00000044795	Cyb5d1	0.680091	0.0238866
ENSMUSG00000024260	Sap130	0.679647	0.432941
ENSMUSG00000001946	Esam	0.679606	0.568967
ENSMUSG00000032449	Slc25a36	0.678883	0.632597
ENSMUSG00000050730	Arhgap42	0.678839	0.414858
ENSMUSG00000037563	Rps16	0.678592	1.02105
ENSMUSG00000048915	Efna5	0.678416	0.684423
ENSMUSG00000027935	Rab13	0.677166	0.848898
ENSMUSG00000000078	Klf6	0.676863	1.06998
ENSMUSG00000048376	F2r	0.67683	0.808437
ENSMUSG00000050896	Rtn4rl2	0.6759	0.0540076
ENSMUSG00000033377	Palmd	0.675371	0.155078
ENSMUSG00000025582	Nptx1	0.674792	0.0337911
ENSMUSG00000039801	2410089E03Rik	0.674266	0.645613
ENSMUSG00000008348	Ubc	0.673908	0.927734
ENSMUSG00000021594	Srd5a1	0.673182	0.227914
ENSMUSG00000025130	P4hb	0.673051	0.519127
ENSMUSG00000027087	Itgav	0.671991	0.441902
ENSMUSG00000053317	Sec61b	0.671317	0.99148
ENSMUSG00000059070	Rpl18	0.671237	1.00854
ENSMUSG00000028042	Zbtb7b	0.671111	0.16581
ENSMUSG00000038002	Cramp1l	0.671018	0.0144085
ENSMUSG00000052456	Asna1	0.67052	0.635659
ENSMUSG00000024725	Ostf1	0.670502	0.667706
ENSMUSG00000022105	Rb1	0.670475	0.324596
ENSMUSG00000006585	Cdt1	0.669925	0.64072
ENSMUSG00000035671	Zswim4	0.669545	0.0499702
ENSMUSG00000054499	Dedd2	0.668823	0.615675
ENSMUSG00000064337	mt-Rnr1	0.668756	1.30458
ENSMUSG00000009549	Srp14	0.668677	1.10889
ENSMUSG00000042548	Asxl1	0.668171	0.289629
ENSMUSG00000055809	Dnaaf3	0.667934	0.552043
ENSMUSG00000027893	Ahcyl1	0.667792	0.463494
ENSMUSG00000015776	Med22	0.667745	0.563784
ENSMUSG00000024998	Plce1	0.666406	-0.187727
ENSMUSG00000039911	Spsb1	0.665974	0.916783
ENSMUSG00000038024	Dennd4c	0.664736	-0.178609
ENSMUSG00000078429	Ctdsp2	0.664672	0.40551
ENSMUSG00000058571	Gpc6	0.664393	0.675338
ENSMUSG00000001131	Timp1	0.66402	1.4391
ENSMUSG00000030057	Cnbp	0.663925	0.674472
ENSMUSG00000016559	H3f3b	0.663641	0.734251
ENSMUSG00000015932	Dstn	0.663392	0.561834
ENSMUSG00000019916	P4ha1	0.663165	0.592667
ENSMUSG00000054520	Sh3bp2	0.661613	0.217583
ENSMUSG00000040466	Blvrb	0.660286	0.864386
ENSMUSG00000052488	Cherp	0.660023	0.491146
ENSMUSG00000015880	Ncapg	0.659958	0.557046
ENSMUSG00000026894	Morn5	0.659898	0.684
ENSMUSG00000027035	Cers6	0.659876	0.286771
ENSMUSG00000003429	Rps11	0.659728	0.681676
ENSMUSG00000032602	Slc25a20	0.659056	0.430243
ENSMUSG00000002289	Angptl4	0.658934	1.9776
ENSMUSG00000019854	Reps1	0.658512	0.500806
ENSMUSG00000031536	Polb	0.657588	0.961602
ENSMUSG00000090733	Rps27	0.656151	1.02969
ENSMUSG00000029708	Gcc1	0.655979	-0.285465
ENSMUSG00000019906	Lin7a	0.655457	0.351449
ENSMUSG00000032463	Faim	0.655408	0.769947
ENSMUSG00000017716	Birc5	0.655008	0.674563
ENSMUSG00000041229	Phf8	0.654047	0.0185503
ENSMUSG00000024812	Tjp2	0.65377	0.613975
ENSMUSG00000027562	Car2	0.653558	0.787143
ENSMUSG00000021182	Ccdc88c	0.653223	-0.197162
ENSMUSG00000031273	Col4a6	0.652659	0.33542
ENSMUSG00000020718	Polg2	0.651783	1.53018
ENSMUSG00000020961	Ston2	0.651376	-0.0314424
ENSMUSG00000059811	Atl2	0.65108	0.682112
ENSMUSG00000010051	Hyal1	0.650406	0.0556191
ENSMUSG00000030409	Dmpk	0.650283	0.463806
ENSMUSG00000102976	Zc3h11a	0.650085	0.0566529
ENSMUSG00000041126	H2afv	0.649965	0.638864
ENSMUSG00000038766	Gabpb2	0.649399	0.355736
ENSMUSG00000039834	Zfp335	0.649375	0.0901675
ENSMUSG00000018672	Copz2	0.649071	0.80324
ENSMUSG00000032905	Atg12	0.648967	0.636112
ENSMUSG00000034610	Zcchc11	0.648772	0.473651
ENSMUSG00000022514	Il1rap	0.648137	0.84128
ENSMUSG00000029007	Agtrap	0.647565	0.463403
ENSMUSG00000041629	Fam104a	0.647484	0.597201
ENSMUSG00000002055	Spag5	0.647209	0.764947
ENSMUSG00000029775	Klhdc10	0.647001	0.502049
ENSMUSG00000054206	Gzmm	0.646374	0.851452
ENSMUSG00000090862	Rps13	0.644841	0.950775
ENSMUSG00000005312	Ubqln1	0.644781	0.573281
ENSMUSG00000065904	Gm26109	0.644715	1.12839
ENSMUSG00000025199	Chuk	0.644709	0.290568
ENSMUSG00000039770	Ypel5	0.643916	0.886214
ENSMUSG00000049252	Lrp1b	0.643492	0.705319
ENSMUSG00000039372	36585	0.642682	0.507751
ENSMUSG00000007739	Cct4	0.642326	0.737645
ENSMUSG00000019977	Hbs1l	0.641956	0.546157
ENSMUSG00000079553	Kifc1	0.641816	0.31965
ENSMUSG00000071369	Map3k5	0.640613	0.303498
ENSMUSG00000030201	Lrp6	0.640079	0.131638
ENSMUSG00000067288	Rps28	0.63914	1.01916
ENSMUSG00000002489	Tiam1	0.63831	-0.0823735
ENSMUSG00000027239	Mdk	0.638058	0.932304
ENSMUSG00000001300	Efnb2	0.636839	0.517082
ENSMUSG00000027712	Anxa5	0.636617	0.705062
ENSMUSG00000021285	Ppp1r13b	0.636499	0.34013
ENSMUSG00000022054	Nefm	0.636386	0.423277
ENSMUSG00000008305	Tle1	0.636146	0.738766
ENSMUSG00000063785	Utp14a	0.636035	0.625061
ENSMUSG00000028771	Ptpn12	0.635427	0.388053
ENSMUSG00000022897	Dyrk1a	0.635225	0.37749
ENSMUSG00000061654	Spry3	0.634979	0.00446844
ENSMUSG00000031821	Gins2	0.634763	0.357906
ENSMUSG00000042289	Hsd3b7	0.634414	0.67607
ENSMUSG00000039007	Cpq	0.634024	0.839746
ENSMUSG00000021482	Aaed1	0.633989	0.437073
ENSMUSG00000031595	Pdgfrl	0.633507	0.663164
ENSMUSG00000020390	Ube2b	0.633486	0.675203
ENSMUSG00000008682	Rpl10	0.633482	0.802749
ENSMUSG00000004105	Angptl2	0.632893	0.856966
ENSMUSG00000040842	Szrd1	0.632711	0.32838
ENSMUSG00000021965	Ska3	0.632507	0.572929
ENSMUSG00000024558	Mapk4	0.632439	0.427363
ENSMUSG00000003355	Fkbp11	0.632189	1.41273
ENSMUSG00000034602	Mon2	0.631459	0.403159
ENSMUSG00000025223	Ldb1	0.630881	0.374063
ENSMUSG00000001768	Rin2	0.630818	0.0972372
ENSMUSG00000022034	Esco2	0.630616	0.528241
ENSMUSG00000020290	Xpo1	0.630559	0.506425
ENSMUSG00000047787	Flrt1	0.630315	-0.136005
ENSMUSG00000060938	Rpl26	0.629116	0.955951
ENSMUSG00000028495	Rps6	0.628855	0.81504
ENSMUSG00000040943	Tet2	0.62749	0.499022
ENSMUSG00000004665	Cnn2	0.627464	0.499302
ENSMUSG00000027176	Cstf3	0.626848	0.771225
ENSMUSG00000039294	BC017643	0.626637	0.421422
ENSMUSG00000040681	Hmgn1	0.625677	0.351853
ENSMUSG00000022010	Tsc22d1	0.625637	0.414124
ENSMUSG00000049124	Gm8186	0.624978	0.734659
ENSMUSG00000027787	Nmd3	0.624815	0.0119514
ENSMUSG00000055254	Ntrk2	0.624716	0.335787
ENSMUSG00000020142	Slc1a4	0.624624	0.262562
ENSMUSG00000002870	Mcm2	0.624304	-0.492242
ENSMUSG00000028108	Ecm1	0.622684	0.719379
ENSMUSG00000028179	Cth	0.621208	0.648968
ENSMUSG00000089726	Mir17hg	0.620645	0.668318
ENSMUSG00000032601	Prkar2a	0.620304	0.150405
ENSMUSG00000020260	Pofut2	0.619378	0.49412
ENSMUSG00000057110	Cntrl	0.619321	0.129864
ENSMUSG00000058600	Rpl30	0.618214	1.18312
ENSMUSG00000011960	Ccnt1	0.617363	-0.112578
ENSMUSG00000046562	Unc119b	0.616961	-0.230246
ENSMUSG00000027349	Fam98b	0.616865	0.810344
ENSMUSG00000040433	Zbtb38	0.616437	-0.0546833
ENSMUSG00000060636	Rpl35a	0.616194	1.02798
ENSMUSG00000032577	Mapkapk3	0.615566	0.243138
ENSMUSG00000075232	Amd1	0.615368	0.646901
ENSMUSG00000025404	R3hdm2	0.61522	0.296704
ENSMUSG00000040945	Rcc2	0.615079	0.679197
ENSMUSG00000019997	Ctgf	0.615027	0.956583
ENSMUSG00000028955	Vamp3	0.614918	0.559325
ENSMUSG00000041187	Prkd2	0.614899	0.0706037
ENSMUSG00000042198	Chchd7	0.614689	0.830382
ENSMUSG00000032536	Trak1	0.614344	0.336109
ENSMUSG00000003402	Prkcsh	0.614107	0.609055
ENSMUSG00000022261	Sdc2	0.613889	0.440583
ENSMUSG00000018800	Abca5	0.613205	0.209506
ENSMUSG00000017861	Mybl2	0.612353	0.110505
ENSMUSG00000041556	Fbxo2	0.612239	0.727914
ENSMUSG00000019845	Tube1	0.611954	0.0579216
ENSMUSG00000033460	Armcx1	0.61161	0.719007
ENSMUSG00000005410	Mcm5	0.611135	-0.128856
ENSMUSG00000063882	Uqcrh	0.611075	0.974076
ENSMUSG00000047215	Rpl9	0.610599	0.852431
ENSMUSG00000012609	Ttll5	0.6105	0.594448
ENSMUSG00000027193	Api5	0.610243	0.192395
ENSMUSG00000049154	Fam183b	0.610031	0.350276
ENSMUSG00000046417	Lrrc75a	0.609456	0.50222
ENSMUSG00000039396	Neil3	0.609404	0.474794
ENSMUSG00000025323	Sp4	0.609336	0.353188
ENSMUSG00000024513	Mbd2	0.609225	0.516832
ENSMUSG00000004980	Hnrnpa2b1	0.608652	0.589736
ENSMUSG00000018363	Smurf2	0.608498	0.475294
ENSMUSG00000045092	S1pr1	0.608277	0.651688
ENSMUSG00000049658	Bdp1	0.607775	0.171492
ENSMUSG00000000001	Gnai3	0.607573	0.23638
ENSMUSG00000065406	Mirlet7i	0.607296	1.04764
ENSMUSG00000038143	Stox2	0.606743	0.079067
ENSMUSG00000038633	Degs1	0.605493	0.268787
ENSMUSG00000038010	Ccdc138	0.605096	0.720952
ENSMUSG00000026238	Ptma	0.604649	0.72259
ENSMUSG00000001025	S100a6	0.604469	1.19468
ENSMUSG00000061787	Rps17	0.604158	0.894686
ENSMUSG00000032411	Tfdp2	0.603991	0.074171
ENSMUSG00000079641	Rpl39	0.602811	0.940683
ENSMUSG00000032116	Stt3a	0.602357	0.0498079
ENSMUSG00000025893	Kbtbd3	0.601466	-0.175605
ENSMUSG00000031278	Acsl4	0.601433	0.455517
ENSMUSG00000002249	Tead3	0.601224	0.187202
ENSMUSG00000030816	Rnf40	0.601047	0.345627
ENSMUSG00000021707	Dhfr	0.601043	0.239449
ENSMUSG00000090125	Pou3f1	0.601031	0.321419
ENSMUSG00000001506	Col1a1	0.600393	0.397351
ENSMUSG00000021242	Npc2	0.600284	0.727095
ENSMUSG00000022311	Csmd3	0.599644	0.533477
ENSMUSG00000024780	Cdc37l1	0.599118	0.0738706
ENSMUSG00000031556	Tm2d2	0.598981	0.630989
ENSMUSG00000025261	Huwe1	0.59875	0.223379
ENSMUSG00000005968	Tuft1	0.598577	0.819716
ENSMUSG00000047767	Atg16l2	0.598548	0.680359
ENSMUSG00000032252	Glce	0.598486	0.114924
ENSMUSG00000069094	Pde7a	0.597952	0.186428
ENSMUSG00000020189	Osbpl8	0.597559	0.0832484
ENSMUSG00000024339	Tap2	0.597236	0.625418
ENSMUSG00000021194	Chga	0.59698	0.735296
ENSMUSG00000050071	Bex1	0.596159	1.1225
ENSMUSG00000064373	Sepp1	0.596137	0.467774
ENSMUSG00000019254	Ppp1r12c	0.595982	0.510023
ENSMUSG00000015090	Ptgds	0.595852	0.67385
ENSMUSG00000023966	Rsph9	0.595434	0.780965
ENSMUSG00000048332	Lhfp	0.594674	0.300073
ENSMUSG00000043716	Rpl7	0.594551	0.765197
ENSMUSG00000024989	Cep55	0.594439	0.448885
ENSMUSG00000035898	Uba6	0.594311	0.318631
ENSMUSG00000021012	Zc3h14	0.59428	0.237273
ENSMUSG00000034275	Igsf9b	0.594248	0.403855
ENSMUSG00000030168	Adipor2	0.593997	0.394085
ENSMUSG00000021996	Esd	0.593931	0.937971
ENSMUSG00000022974	Paxbp1	0.593092	0.555692
ENSMUSG00000033308	Dpyd	0.59305	0.736596
ENSMUSG00000015522	Arnt	0.593017	0.34102
ENSMUSG00000037712	Fermt2	0.592994	0.535279
ENSMUSG00000032399	Rpl4	0.592936	0.718541
ENSMUSG00000041220	Elovl6	0.592438	0.15581
ENSMUSG00000060487	Samd5	0.592318	0.264901
ENSMUSG00000024795	Kif20b	0.592275	0.341777
ENSMUSG00000018567	Gabarap	0.592259	0.76057
ENSMUSG00000085795	Zfp703	0.591833	1.07705
ENSMUSG00000057130	Txnl4a	0.590727	0.754456
ENSMUSG00000045302	Preb	0.590284	0.356296
ENSMUSG00000003234	Abcf3	0.589872	0.333622
ENSMUSG00000030681	Mvp	0.588075	-0.0459808
ENSMUSG00000093989	Rnasek	0.587931	0.878052
ENSMUSG00000076431	Sox4	0.587175	0.365017
ENSMUSG00000027763	Mbnl1	0.586932	0.562483
ENSMUSG00000023951	Vegfa	0.586306	0.915954
ENSMUSG00000021589	Rhobtb3	0.586019	0.0591504
ENSMUSG00000004056	Akt2	0.585668	0.12705
ENSMUSG00000028480	Glipr2	0.585516	0.432843
ENSMUSG00000079215	Zfp664	0.58506	0.13175
ENSMUSG00000027882	Stxbp3	0.584984	0.0829468
ENSMUSG00000074129	Rpl13a	0.584805	1.0283
ENSMUSG00000026701	Prdx6	0.584691	0.673194
ENSMUSG00000004931	Apba3	0.584613	0.500282
ENSMUSG00000049866	Arl4c	0.584333	0.387682
ENSMUSG00000048732	Klhl11	0.584107	0.027275
ENSMUSG00000002222	Rmnd5a	0.583726	0.428572
ENSMUSG00000049517	Rps23	0.583603	0.938816
ENSMUSG00000031007	Atp6ap2	0.583271	0.700021
ENSMUSG00000041995	Zbed3	0.583178	0.838546
ENSMUSG00000031627	Irf2	0.58315	0.345333
ENSMUSG00000031521	Aga	0.582334	0.449829
ENSMUSG00000071637	Cebpd	0.58198	1.39743
ENSMUSG00000048776	Pthlh	0.58196	0.867748
ENSMUSG00000044792	Isca1	0.581822	0.719391
ENSMUSG00000063704	Mapk15	0.581155	0.544012
ENSMUSG00000045128	Rpl18a	0.58098	0.954215
ENSMUSG00000028378	Ptgr1	0.580625	0.726321
ENSMUSG00000032667	Pon2	0.580542	0.658829
ENSMUSG00000030796	Tead2	0.580445	0.602844
ENSMUSG00000022253	Nadk2	0.579437	0.598317
ENSMUSG00000030224	Strap	0.578955	0.666996
ENSMUSG00000030235	Slco1c1	0.57856	0.62041
ENSMUSG00000010154	Spire2	0.578427	0.23835
ENSMUSG00000025809	Itgb1	0.578128	0.4484
ENSMUSG00000031586	Rbpms	0.578079	0.970622
ENSMUSG00000005802	Slc30a4	0.578064	0.217939
ENSMUSG00000040189	Ccdc114	0.577903	0.462374
ENSMUSG00000040952	Rps19	0.577713	0.914552
ENSMUSG00000034994	Eef2	0.577686	0.603072
ENSMUSG00000025747	Tyms	0.577548	0.114852
ENSMUSG00000024856	Cdk2ap2	0.577398	0.788112
ENSMUSG00000022241	Tars	0.577337	0.544659
ENSMUSG00000038132	Rbm24	0.577308	0.319006
ENSMUSG00000022272	Myo10	0.576788	0.697371
ENSMUSG00000028334	Nans	0.576769	0.534482
ENSMUSG00000034906	Ncaph	0.576546	0.421892
ENSMUSG00000046768	Rhoj	0.576327	0.951783
ENSMUSG00000006412	Pfdn2	0.576283	0.511495
ENSMUSG00000018865	Sult4a1	0.576156	0.713614
ENSMUSG00000047714	Ppp1r2	0.576043	0.364789
ENSMUSG00000030536	Iqgap1	0.575819	0.351306
ENSMUSG00000102918	Pcdhgc3	0.575777	0.371593
ENSMUSG00000021391	Cenpp	0.575737	0.265973
ENSMUSG00000030161	Gabarapl1	0.575655	0.620795
ENSMUSG00000019978	Epb4.1l2	0.574848	0.415996
ENSMUSG00000021900	Btd	0.574467	0.125061
ENSMUSG00000022912	Pros1	0.574415	0.655847
ENSMUSG00000073678	Pgap1	0.574297	0.140831
ENSMUSG00000000058	Cav2	0.573885	0.431564
ENSMUSG00000029131	Dnajb6	0.573598	0.657766
ENSMUSG00000002233	Rhoc	0.573454	0.89538
ENSMUSG00000040423	Rc3h1	0.572628	0.481684
ENSMUSG00000031760	Mt3	0.572263	0.906888
ENSMUSG00000036057	Ptpn23	0.571701	0.232703
ENSMUSG00000054091	1810037I17Rik	0.571686	0.634583
ENSMUSG00000032599	Ip6k2	0.571553	0.812815
ENSMUSG00000045176	2310047M10Rik	0.571392	0.552802
ENSMUSG00000062647	Rpl7a	0.570982	0.779284
ENSMUSG00000022678	Nde1	0.570025	0.380485
ENSMUSG00000006127	Inpp5k	0.569903	0.689839
ENSMUSG00000041390	Mdfic	0.569903	0.461632
ENSMUSG00000035919	Bbs9	0.569831	0.321296
ENSMUSG00000028583	Pdpn	0.569669	0.772991
ENSMUSG00000078851	Hist3h2a	0.569384	0.411499
ENSMUSG00000029781	Fkbp9	0.568869	0.246876
ENSMUSG00000004127	Trmt10a	0.568556	0.338309
ENSMUSG00000063856	Gpx1	0.568521	0.956443
ENSMUSG00000021986	Amer2	0.56816	0.217234
ENSMUSG00000029535	Triap1	0.567059	0.397823
ENSMUSG00000028176	Lrrc7	0.566984	0.537847
ENSMUSG00000022637	Cblb	0.56643	0.133668
ENSMUSG00000036120	Rfxank	0.5661	-0.143656
ENSMUSG00000046330	Rpl37a	0.565991	1.07951
ENSMUSG00000054434	Tmem120b	0.565639	0.297959
ENSMUSG00000019856	Fam184a	0.565337	0.661402
ENSMUSG00000027881	Prpf38b	0.564775	0.441553
ENSMUSG00000029201	Ugdh	0.564052	0.262873
ENSMUSG00000041974	Spidr	0.563991	0.750319
ENSMUSG00000028173	Wls	0.56398	0.257419
ENSMUSG00000036777	Anln	0.563454	0.314991
ENSMUSG00000059586	Nsmce2	0.563114	0.47438
ENSMUSG00000029169	Dhx15	0.562771	0.325352
ENSMUSG00000070002	Ell	0.56267	-0.0431179
ENSMUSG00000026074	Map4k4	0.562618	0.265139
ENSMUSG00000042745	Id1	0.562539	1.47812
ENSMUSG00000025938	Slco5a1	0.561961	0.476218
ENSMUSG00000024359	Hspa9	0.561589	0.408229
ENSMUSG00000008393	Carhsp1	0.561273	0.464236
ENSMUSG00000067818	Myl9	0.561245	0.737137
ENSMUSG00000007613	Tgfbr1	0.560717	0.690636
ENSMUSG00000044916	1700029I15Rik	0.560605	0.755605
ENSMUSG00000020361	Hspa4	0.560487	0.357508
ENSMUSG00000040123	Zmym5	0.560406	0.24165
ENSMUSG00000053617	Sh3pxd2a	0.56024	0.449271
ENSMUSG00000042784	Muc1	0.5591	0.688965
ENSMUSG00000021264	Yy1	0.55897	0.428231
ENSMUSG00000026669	Mcm10	0.558658	0.757788
ENSMUSG00000073702	Rpl31	0.557628	0.942943
ENSMUSG00000062006	Rpl34	0.55736	0.917541
ENSMUSG00000079555	Haus3	0.557226	0.0504723
ENSMUSG00000009470	Tnpo1	0.556397	0.320242
ENSMUSG00000036461	Elf1	0.556289	0.600681
ENSMUSG00000036943	Rab8b	0.556171	-0.0107355
ENSMUSG00000067274	Rplp0	0.556143	0.689035
ENSMUSG00000025037	Maoa	0.556052	0.337661
ENSMUSG00000039001	Rps21	0.556007	1.04931
ENSMUSG00000059866	Tnip2	0.556004	0.585835
ENSMUSG00000039634	Zfp189	0.555888	-0.352265
ENSMUSG00000070972	Dnajc25	0.555542	0.676437
ENSMUSG00000046152	Fut10	0.555405	-0.47714
ENSMUSG00000028228	Cpne3	0.555386	0.0714599
ENSMUSG00000031353	Rbbp7	0.554257	0.574523
ENSMUSG00000020334	Slc22a4	0.553435	0.75011
ENSMUSG00000024900	Cpt1a	0.553114	0.496557
ENSMUSG00000066415	Msl2	0.553105	0.423841
ENSMUSG00000037487	Ubr5	0.552882	0.235577
ENSMUSG00000024533	Spire1	0.552449	0.320158
ENSMUSG00000003970	Rpl8	0.551518	0.858817
ENSMUSG00000042524	Sun2	0.551244	0.234085
ENSMUSG00000039908	Slc26a11	0.550867	0.38345
ENSMUSG00000023094	Msrb2	0.550701	0.392451
ENSMUSG00000021831	Ero1l	0.550118	0.268453
ENSMUSG00000038056	Kmt2c	0.549578	0.123405
ENSMUSG00000032181	Scg3	0.549397	0.585838
ENSMUSG00000020821	Kif1c	0.549181	0.127734
ENSMUSG00000020473	Aebp1	0.549027	0.339501
ENSMUSG00000071415	Rpl23	0.548835	0.894019
ENSMUSG00000021171	Esyt2	0.548792	0.349876
ENSMUSG00000020937	Plcd3	0.548354	0.699831
ENSMUSG00000047115	Fam221a	0.547457	1.50027
ENSMUSG00000041132	N4bp2l1	0.546573	0.659767
ENSMUSG00000071398	2410004P03Rik	0.545985	0.417911
ENSMUSG00000020330	Hmmr	0.545736	-0.367778
ENSMUSG00000027997	Casp6	0.545487	0.121289
ENSMUSG00000041028	Ghitm	0.545104	0.724992
ENSMUSG00000028689	Ccdc163	0.545086	0.451504
ENSMUSG00000020009	Ifngr1	0.545013	0.117346
ENSMUSG00000006715	Gmnn	0.544154	0.461957
ENSMUSG00000035934	Pknox2	0.544086	-0.156211
ENSMUSG00000039385	Cdh6	0.543343	0.56967
ENSMUSG00000059003	Grin2a	0.543296	0.0361485
ENSMUSG00000042105	Inpp5f	0.542872	0.25134
ENSMUSG00000010358	Ifi35	0.54285	0.959553
ENSMUSG00000031972	Acta1	0.542584	1.17862
ENSMUSG00000005054	Cstb	0.542574	0.669323
ENSMUSG00000051615	Rap2a	0.542344	0.108545
ENSMUSG00000056851	Pcbp2	0.542188	0.338159
ENSMUSG00000040997	Abhd4	0.541991	0.323367
ENSMUSG00000022257	Laptm4b	0.541858	0.819479
ENSMUSG00000057841	Rpl32	0.541713	0.939062
ENSMUSG00000066113	Adamtsl1	0.541465	0.499658
ENSMUSG00000001123	Lgals9	0.541377	0.320482
ENSMUSG00000060257	Scrt2	0.541103	0.117018
ENSMUSG00000060036	Rpl3	0.540932	0.804548
ENSMUSG00000038546	Ranbp9	0.540168	0.39712
ENSMUSG00000060032	H2afj	0.540005	0.550782
ENSMUSG00000025492	Ifitm3	0.539954	1.01281
ENSMUSG00000089762	Ier5l	0.538544	0.156854
ENSMUSG00000019942	Cdk1	0.538235	0.784238
ENSMUSG00000031786	Drc7	0.53681	0.498992
ENSMUSG00000024608	Rps14	0.536005	1.01445
ENSMUSG00000030704	Rab6a	0.53593	0.448303
ENSMUSG00000032050	Rdx	0.535686	0.374504
ENSMUSG00000058440	Nrf1	0.535679	0.0290739
ENSMUSG00000079057	Cyp4v3	0.535573	0.256375
ENSMUSG00000015599	Ttbk1	0.535223	0.20421
ENSMUSG00000038349	Plcl1	0.535118	0.226304
ENSMUSG00000022982	Sod1	0.53501	0.903781
ENSMUSG00000006676	Usp19	0.534983	0.170511
ENSMUSG00000006519	Cyba	0.534482	1.21146
ENSMUSG00000020263	Appl2	0.53447	0.234285
ENSMUSG00000066595	Mfsd7b	0.534076	0.602119
ENSMUSG00000040204	2810417H13Rik	0.533936	0.625294
ENSMUSG00000007812	Zfp655	0.533723	-0.0300078
ENSMUSG00000029070	Mxra8	0.533681	0.289682
ENSMUSG00000022508	Bcl6	0.533473	0.702145
ENSMUSG00000026880	Stom	0.533024	0.419094
ENSMUSG00000031922	Cep57	0.532895	0.514244
ENSMUSG00000029578	Wipi2	0.532636	0.414708
ENSMUSG00000020362	Cnot6	0.532258	0.104706
ENSMUSG00000027778	Ift80	0.531879	-0.276648
ENSMUSG00000026674	Ddr2	0.531826	0.281151
ENSMUSG00000028653	Trit1	0.531129	0.398408
ENSMUSG00000033949	Trim36	0.530718	0.104104
ENSMUSG00000039298	Cdk5rap2	0.529984	0.251535
ENSMUSG00000027796	Smad9	0.529909	0.32459
ENSMUSG00000096956	Snhg18	0.529756	-0.0293499
ENSMUSG00000022899	Slc15a2	0.529292	2.64943
ENSMUSG00000060601	Nr1h2	0.528448	0.553488
ENSMUSG00000032939	Nup93	0.528407	0.374102
ENSMUSG00000040797	Iqsec3	0.528209	-0.00921602
ENSMUSG00000032348	Gsta4	0.528004	0.683548
ENSMUSG00000028234	Rps20	0.527895	0.870048
ENSMUSG00000058152	Chsy3	0.52769	0.106876
ENSMUSG00000032373	Car12	0.527624	0.980025
ENSMUSG00000036181	Hist1h1c	0.527473	0.524539
ENSMUSG00000042079	Hnrnpf	0.526893	0.426354
ENSMUSG00000029864	Gstk1	0.526618	0.415313
ENSMUSG00000041605	5730559C18Rik	0.526566	0.985844
ENSMUSG00000060152	Pop5	0.526412	0.49107
ENSMUSG00000019850	Tnfaip3	0.526333	0.0953791
ENSMUSG00000031422	Morf4l2	0.526225	0.569721
ENSMUSG00000016256	Ctsz	0.525909	0.952748
ENSMUSG00000020037	Rfx4	0.525797	-0.030708
ENSMUSG00000020372	Gnb2l1	0.524699	0.742644
ENSMUSG00000036992	Nxt1	0.524465	0.545965
ENSMUSG00000040836	Gpr161	0.52417	0.18088
ENSMUSG00000023913	Pla2g7	0.522776	0.511268
ENSMUSG00000015837	Sqstm1	0.522651	0.527625
ENSMUSG00000028066	Pmf1	0.522595	0.486205
ENSMUSG00000055065	Ddx17	0.521842	0.434977
ENSMUSG00000025362	Rps26	0.521787	1.01721
ENSMUSG00000039208	Metrnl	0.521489	0.24241
ENSMUSG00000027951	Adar	0.521338	0.0818237
ENSMUSG00000014956	Ppp1cb	0.520657	0.473278
ENSMUSG00000031667	Aktip	0.520458	0.542122
ENSMUSG00000031812	Map1lc3b	0.520294	0.630184
ENSMUSG00000062785	Kcnc3	0.520085	0.0686351
ENSMUSG00000032702	Kank1	0.519948	0.000320684
ENSMUSG00000017404	Rpl19	0.519544	0.863958
ENSMUSG00000031352	Hccs	0.519298	0.228085
ENSMUSG00000038055	Dexi	0.519203	0.391158
ENSMUSG00000021477	Ctsl	0.519064	0.610931
ENSMUSG00000024087	Cyp1b1	0.518787	1.13221
ENSMUSG00000031262	Cenpi	0.518781	0.701345
ENSMUSG00000031010	Usp9x	0.518636	0.129908
ENSMUSG00000032085	Tagln	0.518419	0.506847
ENSMUSG00000021660	Btf3	0.518325	0.694603
ENSMUSG00000046743	Fat4	0.517799	-0.0664469
ENSMUSG00000020241	Col6a2	0.517588	0.187013
ENSMUSG00000037826	Ppm1k	0.517461	0.321991
ENSMUSG00000017421	Zfp207	0.517323	0.243457
ENSMUSG00000041203	2310036O22Rik	0.517278	0.844751
ENSMUSG00000037204	Atg101	0.517141	0.568614
ENSMUSG00000037795	N4bp2	0.517031	0.332011
ENSMUSG00000034467	Dynlrb2	0.516968	0.796361
ENSMUSG00000033900	Map9	0.516704	0.206487
ENSMUSG00000017009	Sdc4	0.516551	1.26356
ENSMUSG00000042688	Mapk6	0.515738	0.0857644
ENSMUSG00000028763	Hspg2	0.515446	0.185295
ENSMUSG00000034317	Trim59	0.51538	0.0683692
ENSMUSG00000042436	Mfap4	0.515139	0.18872
ENSMUSG00000063457	Rps15	0.515058	1.01682
ENSMUSG00000060798	Intu	0.514796	-0.00326787
ENSMUSG00000055531	Cpsf6	0.514744	0.405513
ENSMUSG00000012848	Rps5	0.514537	0.94863
ENSMUSG00000035314	Gdpd5	0.514126	0.514373
ENSMUSG00000056515	Rab31	0.514072	0.300253
ENSMUSG00000079834	Tmlhe	0.513814	0.510829
ENSMUSG00000039323	Igfbp2	0.513764	0.981134
ENSMUSG00000092060	Bend4	0.513479	0.399053
ENSMUSG00000029710	Ephb4	0.513007	0.208535
ENSMUSG00000025732	Fam195a	0.512761	0.840447
ENSMUSG00000025932	Eya1	0.512421	1.25333
ENSMUSG00000024393	Prrc2a	0.512341	0.222251
ENSMUSG00000024429	Gnl1	0.511494	0.506158
ENSMUSG00000024070	Prkd3	0.511434	-0.288072
ENSMUSG00000048897	Zfp710	0.511421	0.398036
ENSMUSG00000021969	Zdhhc20	0.511015	0.0578463
ENSMUSG00000039886	Tmem120a	0.510861	0.361802
ENSMUSG00000036275	9530068E07Rik	0.510702	0.33215
ENSMUSG00000025982	Sf3b1	0.510643	0.434034
ENSMUSG00000039458	Mtmr12	0.510506	0.941003
ENSMUSG00000022210	Dhrs4	0.510271	0.562873
ENSMUSG00000032440	Tgfbr2	0.510202	0.11037
ENSMUSG00000000346	Dazap2	0.510098	0.458119
ENSMUSG00000024217	Snrpc	0.50985	0.708346
ENSMUSG00000022336	Eif3e	0.509485	0.681598
ENSMUSG00000049807	Arhgap23	0.508879	0.478414
ENSMUSG00000029326	Enoph1	0.50855	0.624793
ENSMUSG00000033159	Cnppd1	0.508541	0.280344
ENSMUSG00000039137	Whrn	0.508353	0.50349
ENSMUSG00000007892	Rplp1	0.507565	1.1341
ENSMUSG00000029657	Hsph1	0.50754	0.31573
ENSMUSG00000005417	Mprip	0.507043	0.112323
ENSMUSG00000031665	Sall1	0.506563	-0.251003
ENSMUSG00000030043	Tacr1	0.506493	-0.0522735
ENSMUSG00000026683	Nuf2	0.506453	0.395739
ENSMUSG00000049504	Proser1	0.505815	-0.0376617
ENSMUSG00000071054	Safb	0.505703	0.514224
ENSMUSG00000060373	Hnrnpc	0.505139	0.584128
ENSMUSG00000024063	Lbh	0.50495	0.447352
ENSMUSG00000020811	Wscd1	0.504764	0.358943
ENSMUSG00000023353	Agap3	0.504579	0.543921
ENSMUSG00000057469	E2f6	0.504563	0.0805145
ENSMUSG00000024640	Psat1	0.503945	0.684269
ENSMUSG00000033684	Qsox1	0.503859	0.304423
ENSMUSG00000029344	Tpst2	0.503555	0.34555
ENSMUSG00000041323	Ak7	0.503058	1.02251
ENSMUSG00000008683	Rps15a	0.502896	0.768826
ENSMUSG00000010136	Pifo	0.502612	1.00522
ENSMUSG00000024219	Anks1	0.502451	-0.20349
ENSMUSG00000030432	Rpl28	0.5022	0.757392
ENSMUSG00000028291	Akirin2	0.501856	0.515481
ENSMUSG00000039219	Arid4b	0.501739	0.398592
ENSMUSG00000068394	Cep152	0.501419	-0.219161
ENSMUSG00000020044	Timp3	0.501316	-0.00973898
ENSMUSG00000005103	Wdr1	0.501311	0.414015
ENSMUSG00000034109	Golim4	0.501146	0.228179
ENSMUSG00000038970	Lmtk2	0.500449	0.110718
ENSMUSG00000030538	Cib1	0.500081	0.618406
ENSMUSG00000046818	Ddit4l	0.499327	0.357965
ENSMUSG00000020460	Rps27a	0.49918	0.951325
ENSMUSG00000002688	Prkd1	0.498756	0.560612
ENSMUSG00000042734	Ttc9	0.4987	0.209215
ENSMUSG00000028333	Anp32b	0.498136	0.777371
ENSMUSG00000001918	Slc1a5	0.498097	0.845322
ENSMUSG00000063663	Brwd3	0.497879	0.143454
ENSMUSG00000056427	Slit3	0.497677	0.250657
ENSMUSG00000029875	Ccdc184	0.496724	0.754587
ENSMUSG00000052748	Swt1	0.496644	-0.34009
ENSMUSG00000034075	Zdhhc5	0.496583	-0.000301536
ENSMUSG00000036046	5031439G07Rik	0.496216	0.300774
ENSMUSG00000026385	Dbi	0.495633	0.784136
ENSMUSG00000038658	Ric1	0.49541	0.0743321
ENSMUSG00000035805	Mlc1	0.495247	0.586025
ENSMUSG00000024817	Uhrf2	0.494891	0.475432
ENSMUSG00000029622	Arpc1b	0.494482	0.745951
ENSMUSG00000018347	Zkscan6	0.494141	-0.0611219
ENSMUSG00000057863	Rpl36	0.494093	0.993444
ENSMUSG00000048612	Myof	0.49408	0.00305339
ENSMUSG00000037455	Slc18b1	0.493508	0.379908
ENSMUSG00000060924	Csmd1	0.492627	0.377827
ENSMUSG00000005360	Slc1a3	0.491033	0.317731
ENSMUSG00000061665	Cd2ap	0.490645	0.0312257
ENSMUSG00000073802	Cdkn2b	0.490302	0.764786
ENSMUSG00000036256	Igfbp7	0.489694	0.319146
ENSMUSG00000016427	Ndufa1	0.489612	0.800875
ENSMUSG00000026393	Nek7	0.489428	-0.0838381
ENSMUSG00000030584	Dpf1	0.488696	0.453993
ENSMUSG00000027602	Map1lc3a	0.488551	0.874718
ENSMUSG00000035007	Rundc1	0.487756	0.0283656
ENSMUSG00000025290	Rps24	0.487307	0.888994
ENSMUSG00000079037	Prnp	0.487198	0.580782
ENSMUSG00000015002	Efr3a	0.486917	0.0838015
ENSMUSG00000057322	Rpl38	0.486906	1.04133
ENSMUSG00000012443	Kif11	0.486884	0.794386
ENSMUSG00000036790	Slitrk2	0.486563	0.480471
ENSMUSG00000000794	Kcnn3	0.486363	0.306832
ENSMUSG00000025967	Eef1b2	0.485748	0.794341
ENSMUSG00000021725	Parp8	0.485579	0.459363
ENSMUSG00000019802	Sec63	0.485429	0.0241942
ENSMUSG00000053950	Adnp2	0.48533	-0.10958
ENSMUSG00000000740	Rpl13	0.485137	0.926655
ENSMUSG00000028465	Tln1	0.485079	0.256084
ENSMUSG00000046364	Rpl27a	0.484894	0.900052
ENSMUSG00000065126	Snord104	0.48489	1.06536
ENSMUSG00000045875	Adra1a	0.484435	0.312626
ENSMUSG00000053398	Phgdh	0.484309	0.87379
ENSMUSG00000093930	Hmgcs1	0.484213	0.489889
ENSMUSG00000055069	Rab39	0.484052	-0.448465
ENSMUSG00000028018	Gstcd	0.48359	-0.233854
ENSMUSG00000031320	Rps4x	0.483527	0.786228
ENSMUSG00000027276	Jag1	0.482957	0.602722
ENSMUSG00000061315	Naca	0.482839	0.717301
ENSMUSG00000008153	Clstn3	0.482546	0.283249
ENSMUSG00000029655	N4bp2l2	0.482462	-0.0754015
ENSMUSG00000047412	Zbtb44	0.482127	0.42542
ENSMUSG00000034573	Ptpn13	0.482123	-0.0500756
ENSMUSG00000028873	Cdca8	0.482024	0.788168
ENSMUSG00000025508	Rplp2	0.481718	1.01228
ENSMUSG00000041841	Rpl37	0.481668	0.97808
ENSMUSG00000021009	Ptpn21	0.48161	-0.0631474
ENSMUSG00000041215	Yeats2	0.481603	0.231708
ENSMUSG00000020534	Shmt1	0.481329	0.153728
ENSMUSG00000060216	Arrb2	0.481278	0.644968
ENSMUSG00000071072	Ptges3	0.480063	0.391242
ENSMUSG00000048249	Crebrf	0.480048	0.140305
ENSMUSG00000060675	Pla2g16	0.479893	0.646384
ENSMUSG00000052423	B4galt3	0.47989	0.32894
ENSMUSG00000044768	D1Ertd622e	0.479853	0.338693
ENSMUSG00000009772	Nuak2	0.479633	0.0310999
ENSMUSG00000020570	Sypl	0.479086	0.389093
ENSMUSG00000032567	Aste1	0.479067	0.953132
ENSMUSG00000001105	Ift20	0.478886	0.486969
ENSMUSG00000025403	Shmt2	0.478845	0.494142
ENSMUSG00000032244	Fem1b	0.478822	0.0871403
ENSMUSG00000009927	Rps25	0.478544	0.76021
ENSMUSG00000062997	Rpl35	0.478537	0.865221
ENSMUSG00000040688	Tbl3	0.47849	-0.0136924
ENSMUSG00000066036	Ubr4	0.47764	0.17053
ENSMUSG00000022580	Rhpn1	0.477375	0.0302859
ENSMUSG00000030774	Pak1	0.477321	0.471904
ENSMUSG00000061273	Mmgt1	0.477169	0.295482
ENSMUSG00000017707	Serinc3	0.477052	0.33605
ENSMUSG00000023505	Cdca3	0.476975	0.633402
ENSMUSG00000025935	Tram1	0.476945	0.23342
ENSMUSG00000047446	Arl4a	0.476932	0.733819
ENSMUSG00000025580	Eif4a3	0.476788	0.46259
ENSMUSG00000039536	Stau1	0.476422	0.155205
ENSMUSG00000020462	Cfap36	0.476101	0.389315
ENSMUSG00000022364	Tbc1d31	0.476009	0.330698
ENSMUSG00000030281	Il17rc	0.475296	0.374951
ENSMUSG00000027765	P2ry1	0.47528	-0.318741
ENSMUSG00000031217	Efnb1	0.475032	0.283941
ENSMUSG00000047959	Kcna3	0.475016	-0.245657
ENSMUSG00000041797	Abca9	0.474408	0.322488
ENSMUSG00000027404	Snrpb	0.474292	0.569545
ENSMUSG00000098234	Snhg6	0.473695	0.847701
ENSMUSG00000024659	Anxa1	0.47361	1.21211
ENSMUSG00000022425	Enpp2	0.473295	0.680536
ENSMUSG00000025794	Rpl14	0.472603	0.796437
ENSMUSG00000031740	Mmp2	0.472557	0.034574
ENSMUSG00000053113	Socs3	0.472455	0.717716
ENSMUSG00000029185	Fam114a1	0.471925	0.133583
ENSMUSG00000028530	Jak1	0.471907	0.196799
ENSMUSG00000040782	Rfwd2	0.471736	0.354758
ENSMUSG00000022141	Nipbl	0.471656	-0.098014
ENSMUSG00000002015	Bcap31	0.471516	0.627009
ENSMUSG00000048799	Cep120	0.471463	0.121318
ENSMUSG00000049940	Pgrmc2	0.471456	0.374106
ENSMUSG00000041734	Kirrel	0.471261	-0.300712
ENSMUSG00000001555	Fkbp10	0.471051	0.40215
ENSMUSG00000026737	Pip4k2a	0.470491	0.235013
ENSMUSG00000026571	Dcaf6	0.470459	0.367477
ENSMUSG00000022817	Itgb5	0.470176	0.231815
ENSMUSG00000027273	Snap25	0.469462	0.400417
ENSMUSG00000079681	Zglp1	0.468977	1.59693
ENSMUSG00000047843	Bri3	0.468972	0.617493
ENSMUSG00000045382	Cxcr4	0.468682	-0.0951883
ENSMUSG00000045103	Dmd	0.468393	0.114613
ENSMUSG00000022146	Osmr	0.468103	2.08435
ENSMUSG00000033009	Ogfod1	0.467733	0.229347
ENSMUSG00000026630	Batf3	0.467706	1.44544
ENSMUSG00000032518	Rpsa	0.46739	0.813195
ENSMUSG00000039735	Fnbp1l	0.466765	0.351458
[truncated: 9,466 more rows]
