# Supplementary material for: Evidence for evolutionary divergence of activity-dependent gene expression in developing neurons
Source: eLife journal article supplement (doi:10.7554/elife.20337), 2016-10-01
Supplement: supp [file elife-20337-supp-v1.zip › elife_poa_e20337_Figure_3_source_data_2.xlsx]

## Sheet: Fig. 3b
DRI in Tc1 neurons : Fold change (human ortholog) / Fold change (mouse ortholog)	Log2(TC1 DRI)	mouse_gene_name	.	FC-hESC-neurons	FC-mouse DIV10 neurons	FC(h-ESC)/FC(mouse DIV10)	Log2 of {FC(h-ESC)/FC(mouse DIV10) }
3.93907	1.97785	Ybey		0.902959	0.227427	3.97032	1.98926
3.60434	1.84974	Ets2		3.806	1.05271	3.61545	1.85417
2.68019	1.42234	Abcg1		3.28377	0.39969	8.21578	3.0384
2.08718	1.06155	Fam207a		1.03191	0.487092	2.11851	1.08305
1.67503	0.74419	Slc37a1		0.943238	0.709771	1.32893	0.410267
1.57755	0.657684	Dip2a		1.03646	0.662166	1.56526	0.646401
1.54521	0.627808	App		1.11288	1.21054	0.919326	-0.121352
1.47755	0.563205	Pcnt		1.14676	0.794357	1.44363	0.529705
1.45298	0.539019	Mcm3ap		0.995506	0.47571	2.09267	1.06535
1.44475	0.530816	Kcnj6		1.18862	0.957273	1.24167	0.312284
1.42918	0.515187	Morc3		1.2515	0.499576	2.50512	1.32488
1.42288	0.50881	Rwdd2b		0.503517	0.636179	0.79147	-0.337393
1.38966	0.47473	Prdm15		1.48234	0.549067	2.69974	1.43282
1.36847	0.452564	Dscr3		1.43043	0.578584	2.4723	1.30585
1.35802	0.441507	C2cd2		0.932521	0.738357	1.26297	0.336818
1.28706	0.364074	Setd4		0.800082	0.628607	1.27279	0.347991
1.23321	0.302415	Ncam2		1.1508	0.918636	1.25273	0.325078
1.2276	0.295836	Wrb		1.2403	1.01471	1.22232	0.289619
1.21007	0.275092	Hlcs		0.691168	0.429019	1.61104	0.687995
1.19768	0.260239	Sumo3		1.36129	0.781131	1.74272	0.801338
1.18437	0.244124	Pdxk		1.39202	0.827837	1.68152	0.749763
1.1559	0.209017	Lss		1.13704	1.08611	1.04689	0.0661133
1.15138	0.203366	Nrip1		1.73267	0.514402	3.36832	1.75203
1.10991	0.150443	Prmt2		1.07635	0.777369	1.38461	0.469476
1.10137	0.139305	Mrpl39		1.31413	0.871857	1.50728	0.591944
1.0987	0.135797	Pcp4		0.969846	0.947689	1.02338	0.0333412
1.09661	0.133057	Dscam		1.3302	1.27378	1.04429	0.0625209
1.09627	0.132607	Atp5j		1.0955	1.10839	0.98837	-0.0168762
1.09477	0.130634	Ltn1		0.982609	0.679462	1.44616	0.532224
1.08111	0.112511	Rbm11		0.608597	0.558812	1.08909	0.123125
1.05052	0.0711019	Trappc10		1.42896	0.855727	1.66988	0.739741
1.04646	0.0655147	Adarb1		2.00151	1.00727	1.98707	0.990644
1.04312	0.0609075	Ttc3		1.521	1.14182	1.33208	0.413682
1.03771	0.0534015	Adamts1		1.45327	6.37885	0.227827	-2.13399
1.01359	0.0194686	Zbtb21		1.85558	2.88347	0.643525	-0.635932
1.01084	0.0155611	Jam2		0.997364	1.15906	0.860493	-0.216765
1.004	0.00575651	Trpm2		0.874424	1.08539	0.805633	-0.311805
1.00158	0.0022753	Lrrc3		1.32295	0.540998	2.44539	1.29007
0.967473	-0.0477074	Pcbp3		1.14751	0.943692	1.21598	0.282115
0.942101	-0.086047	Psmg1		1.1575	1.08485	1.06696	0.0935084
0.940264	-0.088862	N6amt1		0.414282	0.735543	0.563232	-0.828198
0.939809	-0.0895607	Cct8		1.22407	1.19786	1.02188	0.0312269
0.891752	-0.165286	Gabpa		1.00133	1.12487	0.890169	-0.167849
0.873041	-0.195878	Brwd1		1.07221	1.02178	1.04935	0.0694959
0.864229	-0.210515	Hunk		1.19842	1.15503	1.03757	0.0532124
0.859646	-0.218186	Usp25		1.12665	1.19279	0.944548	-0.0823037
0.852861	-0.229617	Pofut2		1.89081	1.54479	1.22399	0.291592
0.851986	-0.231098	Agpat3		0.964789	0.92937	1.03811	0.0539612
0.846933	-0.23968	Hspa13		1.08523	0.97406	1.11413	0.155914
0.819264	-0.2876	Grik1		0.920443	1.1321	0.813042	-0.298598
0.807695	-0.308117	Pfkl		0.931038	1.08752	0.856113	-0.224127
0.804623	-0.313615	Cbr1		0.805145	1.02442	0.785954	-0.347483
0.78755	-0.344557	1810043G02Rik		1.21247	1.13716	1.06622	0.0925078
0.7868	-0.34593	Dyrk1a		1.38662	1.56178	0.887846	-0.171619
0.775826	-0.366195	Dopey2		1.01572	0.967365	1.04999	0.070369
0.77037	-0.376377	Cxadr		1.56618	1.38033	1.13464	0.182233
0.761802	-0.392512	Bach1		1.14685	1.89437	0.605397	-0.724048
0.748757	-0.41743	Ube2g2		1.14584	1.06802	1.07287	0.101478
0.747803	-0.419271	Scaf4		1.40311	1.06955	1.31188	0.391635
0.72704	-0.459893	Tiam1		1.48496	1.56353	0.949751	-0.0743783
0.711981	-0.49009	Sod1		1.21383	1.45842	0.832292	-0.264838
0.709992	-0.494125	Pknox1		1.20598	1.90964	0.631525	-0.663088
0.676151	-0.564582	Wdr4		0.757096	0.821665	0.921417	-0.118074
0.650516	-0.620344	Hmgn1		0.857338	1.58373	0.541343	-0.885386
0.643913	-0.635063	Pttg1ip		1.52383	1.99122	0.765274	-0.385951
0.639234	-0.645583	Usp16		1.01715	1.25562	0.810077	-0.303869
0.625176	-0.677666	Rrp1		1.64711	1.77835	0.926199	-0.110605
0.602529	-0.730897	Rrp1b		1.27714	0.880148	1.45105	0.537101
0.570745	-0.809081	Pigp		0.713455	0.924055	0.772092	-0.373155
0.516713	-0.952565	Cstb		1.38951	1.47209	0.943906	-0.0832842
0.420163	-1.25098	Mir99ahg		0.812983	2.7485	0.295791	-1.75735
0.291466	-1.7786	Chaf1b		0.62709	3.34317	0.187573	-2.41447
