# Supplementary material for: Evidence for evolutionary divergence of activity-dependent gene expression in developing neurons
Source: eLife journal article supplement (doi:10.7554/elife.20337), 2016-10-01
Supplement: supp [file elife-20337-supp-v1.zip › elife_poa_e20337_Figure_3_source_data_3.xlsx]

## Sheet: Fig. 3c-f
3c
	Human		Mouse
	Mean	SEM	Mean	SEM
0h	1		1
4h	3.73389	1.0927	1.33978	0.260145
24h	1.45488	0.186147	1.54964	0.0585923
3d	Human		Mouse
0 h	1	0	1	0
2 h	1.44414	0.142849	0.880217	0.0981226
4 h	3.1118	0.366024	0.911935	0.0502138
8 h	1.38915	0.144506	1.70497	0.216956
3e
Hsa-ETS2-luc (con)	18.789	0.83471
Hsa-ETS2-luc (TAM67)	4.82954	0.362037
Hsa-ETS2-luc	13.6788	1.99293
Mmu-Ets2-luc	1.26388	0.135922
Hsa-ETS2(delta_AP1)-luc	1.3875	0.298013
3f	h-PTDSS1		m-PTDSS1
	average	SE	average	SE
con	1		1
2h	1.06825	0.0651011	1.06226	0.117094
4h	1.83027	0.0509028	1.03132	0.0640969
8h	2.38812	0.239556	0.804022	0.144737
	h-CCNH		m-CCNH
	average	SE	average	SE
con	1		1
2h	3.70986	0.231091	1.01401	0.240171
4h	3.61638	0.250828	1.33785	0.563733
8h	2.37295	0.142867	1.27993	0.998544
	h-ATP1B1		m-ATP1B1
	average	SE	average	SE
con	1		1
2h	1.4387	0.176314	1.30337	0.0811433
4h	2.20244	0.420544	1.34446	0.0791758
8h	2.50174	0.39978	1.28596	0.077609
	h-KCTD1		m-KCTD1
	average	SE	average	SE
con	1		1
2h	0.596564	0.0249579	1.0993	0.0943181
4h	0.340253	0.0230084	1.14755	0.155691
8h	0.413363	0.0449965	1.111	0.191605
	h-LMBRD2		m-LMBRD2
	average	SE	average	SE
con	1		1
2h	0.67044	0.0174541	1.547	0.254649
4h	0.504466	0.0452279	1.30982	0.0948013
8h	0.360502	0.0295939	1.13441	0.136729
	h-TRAFD1		m-TRAFD1
	average	SE	average	SE
con	1		1
2h	0.616024	0.0167131	1.13219	0.188247
4h	0.441588	0.0284492	1.27226	0.273057
8h	0.541453	0.0642174	1.44799	0.542331
