# Supplementary figures and images for: Evidence for evolutionary divergence of activity-dependent gene expression in developing neurons
Source: eLife journal article supplement (doi:10.7554/elife.20337), 2016-10-01

**Figure 2-figure supplement 1.**

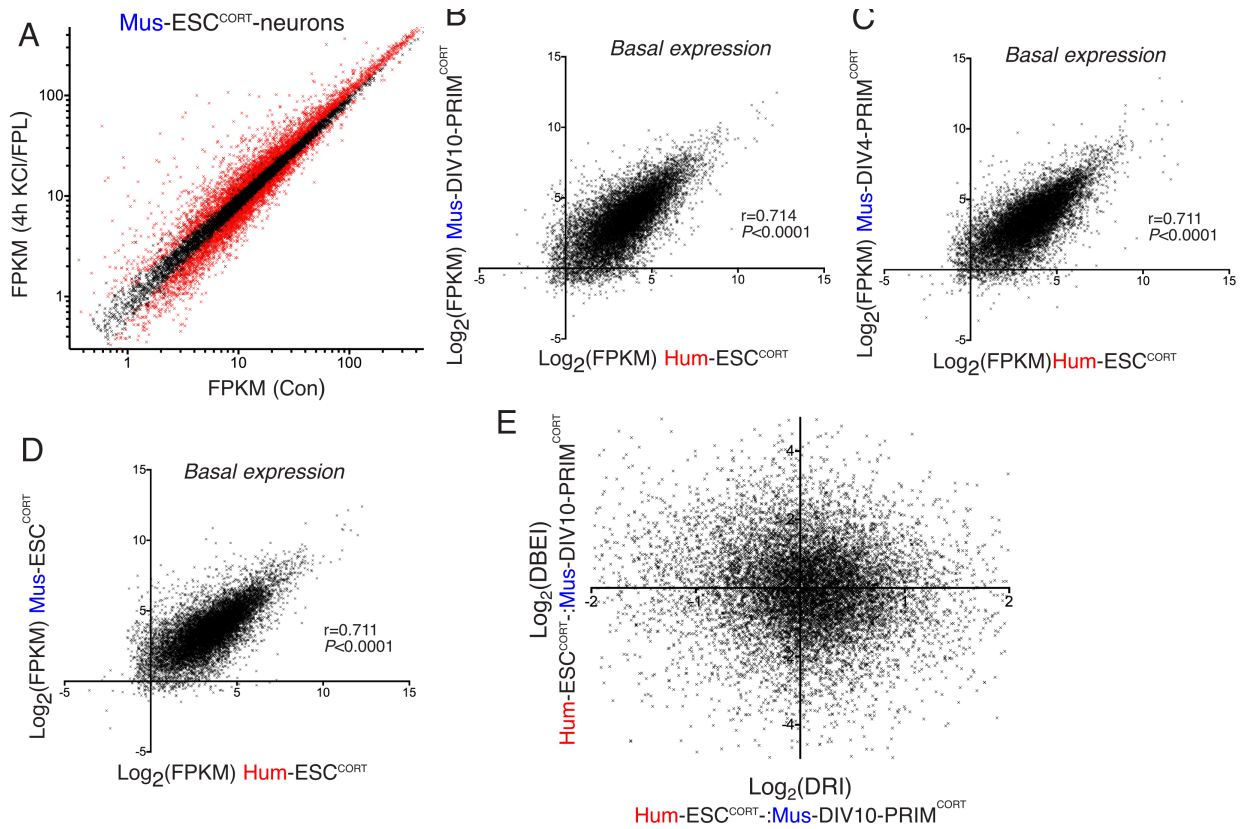

Supplement: supp [file elife-20337-supp-v1.zip]
